# Supplementary material for: Linking Transcriptional Changes over Time in Stimulated Dendritic Cells to Identify Gene Networks Activated during the Innate Immune Response
Source: PubMed Central journal article supplement (PMC3820512; doi:10.1371/journal.pcbi.1003323), 2013-11-07

Supporting Figure 1. Relationship between flow predicted for a gene and the average statistical significance of its occurrence in the optimal subnetwork

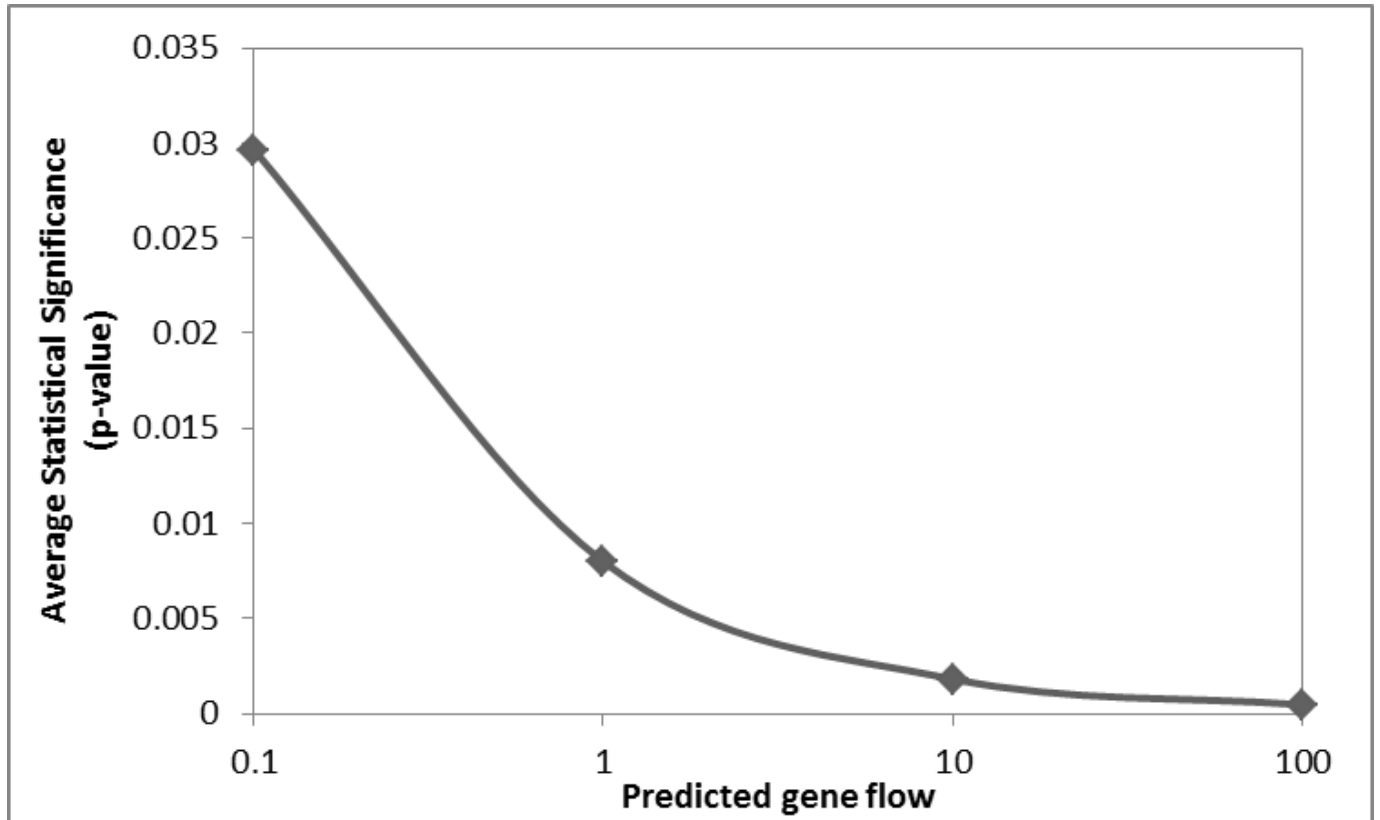

Supplement: pcbi.1003323.s001.pdf [file pcbi.1003323.s001.pdf]
