# Supplementary material for: Linking Transcriptional Changes over Time in Stimulated Dendritic Cells to Identify Gene Networks Activated during the Innate Immune Response
Source: PubMed Central journal article supplement (PMC3820512; doi:10.1371/journal.pcbi.1003323), 2013-11-07

Supporting Figure S2. The fraction of identified paths of length 3 in the optimal subnetwork having a certain fraction of genes from the same KEGG pathway.

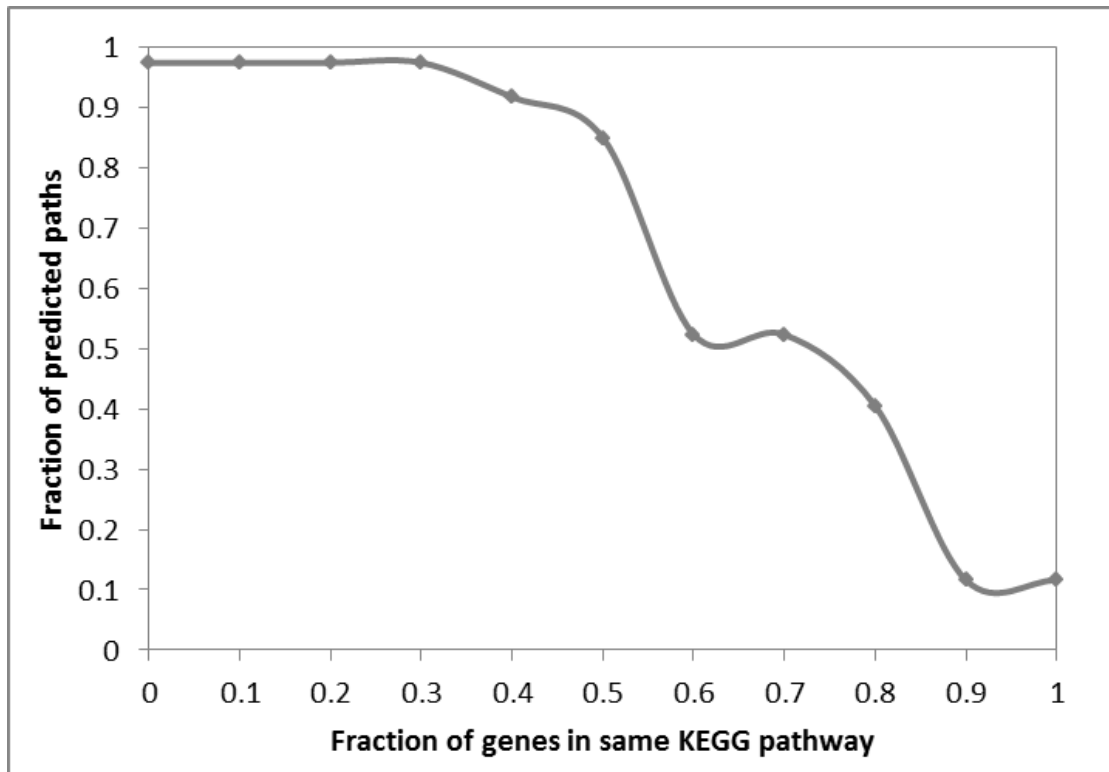

Supplement: pcbi.1003323.s002.pdf [file pcbi.1003323.s002.pdf]
