# Supplementary material for: Linking Transcriptional Changes over Time in Stimulated Dendritic Cells to Identify Gene Networks Activated during the Innate Immune Response
Source: PubMed Central journal article supplement (PMC3820512; doi:10.1371/journal.pcbi.1003323), 2013-11-07

Supporting Figure S4. Overlap between the genes within the optimal subnetwork and the KEGG Pathways in Cancer. (Pink: 0.5-1hr, Yellow: 2-4 hrs, Mintgreen: 6-8hrs, Blue: identified, Green: Not in optimal network)

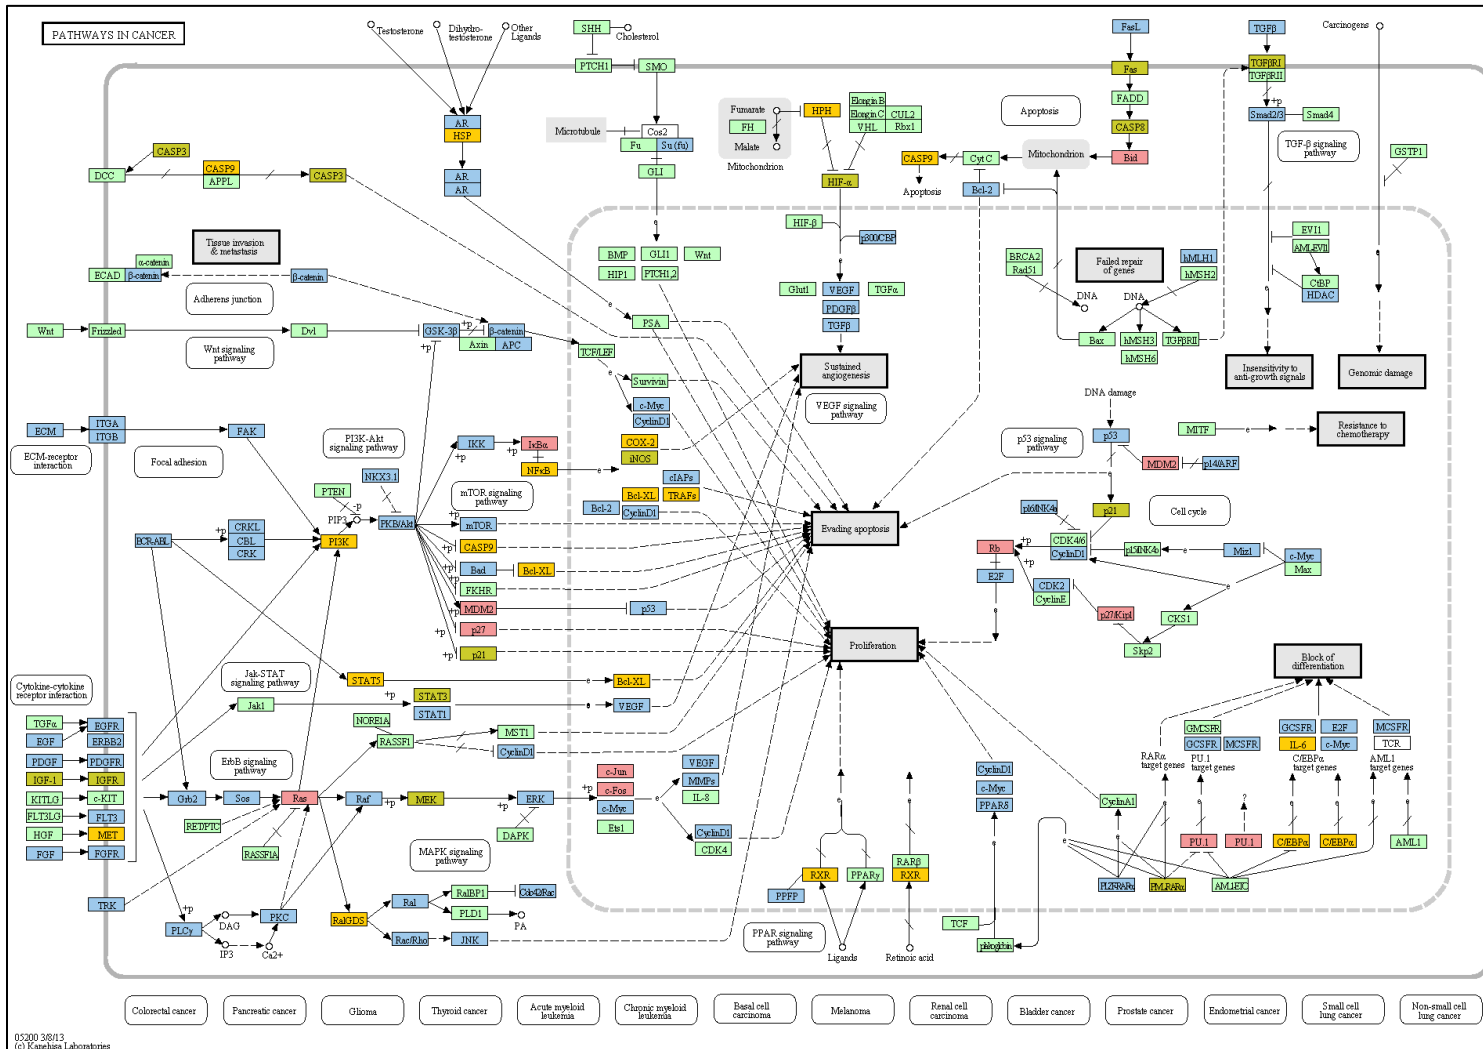

Supplement: pcbi.1003323.s004.pdf [file pcbi.1003323.s004.pdf]
