# Supplementary material for: Linking Transcriptional Changes over Time in Stimulated Dendritic Cells to Identify Gene Networks Activated during the Innate Immune Response
Source: PubMed Central journal article supplement (PMC3820512; doi:10.1371/journal.pcbi.1003323), 2013-11-07

Supporting Figure S8. Overlap between the genes within the optimal subnetwork and the KEGG NF-Kappa B Signaling pathway. (Pink: 0.5-1hr, Yellow: 2-4 hrs, Mintgreen: 6-8hrs, Blue: identified, Green: Not in optimal sub-network)

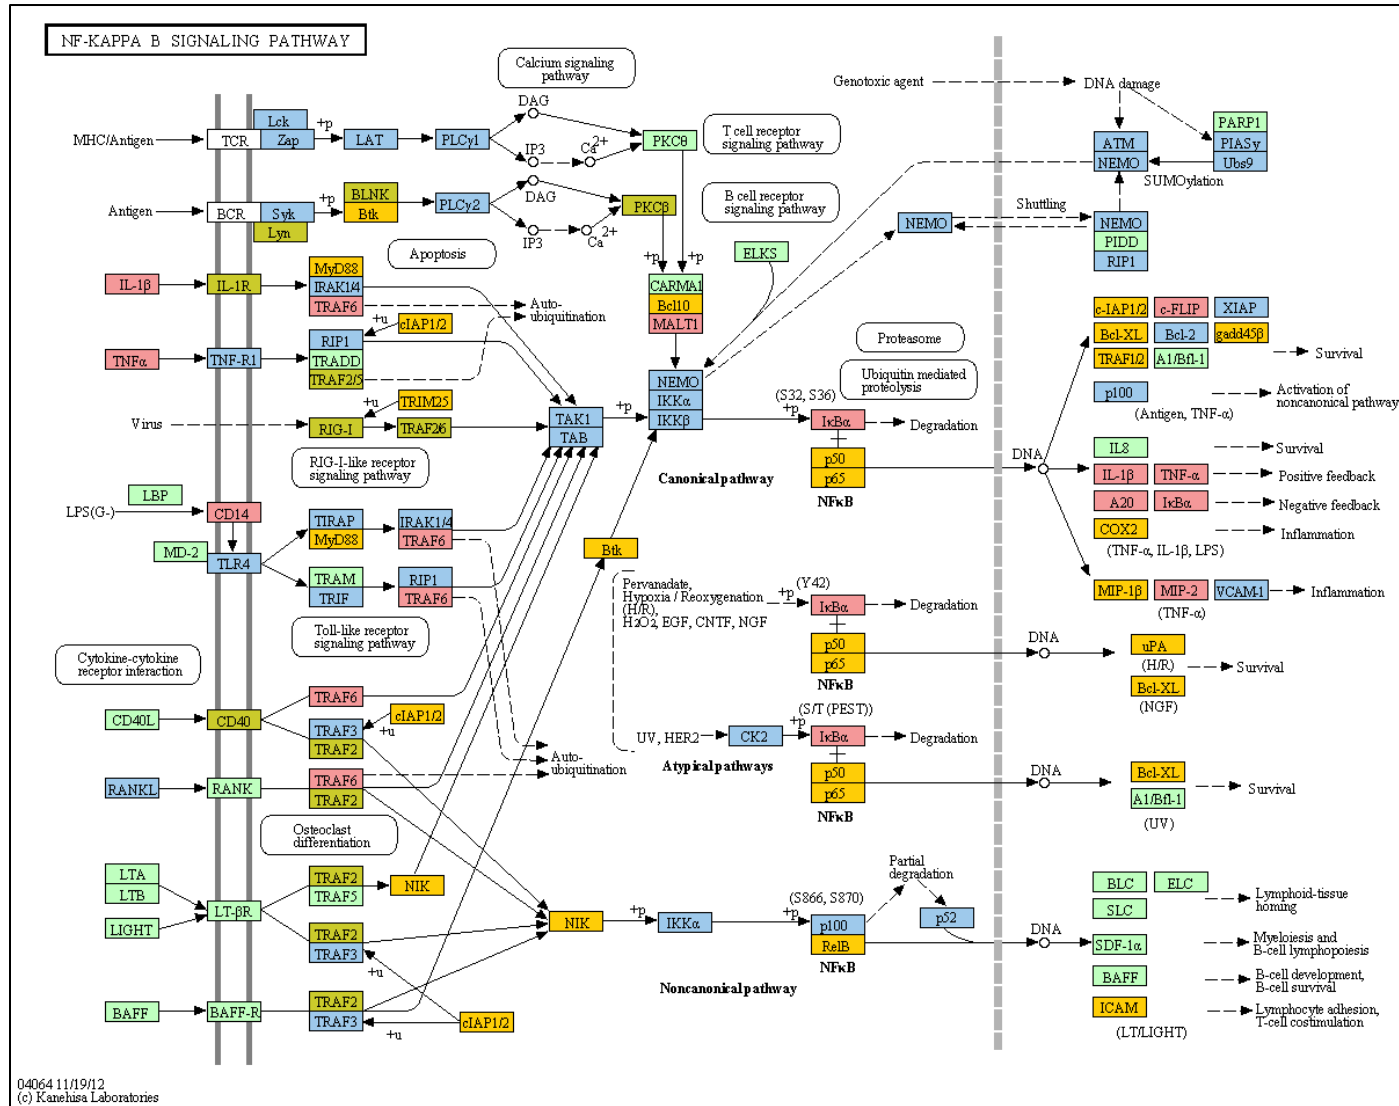

Supplement: pcbi.1003323.s008.pdf [file pcbi.1003323.s008.pdf]
