# Supplementary material for: Linking Transcriptional Changes over Time in Stimulated Dendritic Cells to Identify Gene Networks Activated during the Innate Immune Response
Source: PLoS Comput Biol. 2013 Nov 7;9(11):e1003323. doi: 10.1371/journal.pcbi.1003323 (PMC3820512; doi:10.1371/journal.pcbi.1003323)
Supplement: Table S2 — Innate immune response regulators from Amit et al. identified by the algorithm. (XLSX) [file pcbi.1003323.s010.xlsx]

## Sheet: Overlap with Amit et al.
Supporting Table S2: Innate immune response regulators from Amit et al. identified by the algorithm
Gene	ranking	Flow	Type	Significance		Type	Time of greatest fold change in expression:
Nfkb1	-14.5	76.8747	Intermediate	0		Early	0.5-1 hrs
Rela	-7.5	23.3514	Intermediate	0		Intermediate	3-4 hrs
Stat5a	-3	20.3993	Intermediate	0		Late	6-8hrs
Irf1	0	17.5324	Intermediate	0		Predicted	No detectable change in expression
Jun	11	13.6758	Early	0
Fos	0	10.3384	Early	0.0106
Stat1	17.5	8.73725	Predicted	0
Stat2	18.5	8.64814	Late	0
Atf3	10	8.29133	Late	0
Irf5	1.5	7.6002	Predicted	0
Sp1	1	7.374	Predicted	0
Atf4	-10.5	5.48905	Early	0
Fus	-10	5.37204	Intermediate	0
Nfkbiz	-21	5.25028	Early	0
Stat4	10.5	5.19849	Predicted	0.0004
Egr1	-0.5	5.19529	Early	0
Sfpi1	-2.5	4.99438	Early	0
Bcl10	6	4.47784	Intermediate	0
Relb	1.5	4.31672	Intermediate	0
Nfkb2	-1	4.0242	Predicted	0
Irf3	2	3.20437	Predicted	0
Nr4a1	-0.5	3.16451	Early	0
Cebpb	-14	2.75273	Late	0
Nmi	1.5	2.66011	Late	0
Ifi35	-1	2.61099	Late	0.0028
Ets2	3.5	2.52367	Early	0.0004
Maff	-0.5	2.41508	Early	0.0014
Cited2	8.5	2.31392	Early	0.0014
Trim25	-2	2.21171	Intermediate	0
Nfe2l2	8	2.04691	Predicted	0
Btg2	3.5	1.9321	Early	0.0034
Rbl1	9	1.81992	Predicted	0.0008
Tgif1	-1	1.73701	Early	0.0014
Lmo4	-3.5	1.70531	Late	0.0052
Ifrd1	3.5	1.70424	Early	0.0032
Klf4	-1.5	1.68265	Early	0
Irf2	-1.5	1.65379	Intermediate	0
Egr2	2.5	1.51842	Intermediate	0.0034
Rel	2	1.45101	Early	0.0028
Irf4	6	1.42792	Early	0
Hcls1	-2	1.42725	Late	0.0042
Skil	-2	1.39863	Early	0
Irf9	14.5	1.38751	Intermediate	0.0012
Id2	3	1.36483	Early	0
Sap30	-7.5	1.33374	Late	0.0016
Pml	6.5	1.25046	Late	0.0002
Bcl3	-0.5	1.10576	Intermediate	0
Zfp36l1	-0.5	1.00612	Early	0.0086
Creb3	2	1	Predicted	0.0024
Batf2	0.5	1	Late	0.011
Rb1	2	0.999999	Early	0
Hif1a	-4.5	0.983172	Late	0.0426
Mafk	0	0.920778	Intermediate	0.0002
Hdac1	-0.5	0.877756	Late	0.0024
Litaf	0	0.83193	Early	0.0118
Batf	-0.5	0.81048	Intermediate	0
Sertad1	1.5	0.718935	Early	0.013
Hopx	1.5	0.691455	Early	0.0148
Dr1	-0.5	0.587734	Predicted	0.0036
Mybbp1a	1.5	0.527807	Early	0.0104
Med21	-1.5	0.525254	Early	0.0098
Irf8	9.5	0.520248	Predicted	0.0016
