# Supplementary material for: Linking Transcriptional Changes over Time in Stimulated Dendritic Cells to Identify Gene Networks Activated during the Innate Immune Response
Source: PLoS Comput Biol. 2013 Nov 7;9(11):e1003323. doi: 10.1371/journal.pcbi.1003323 (PMC3820512; doi:10.1371/journal.pcbi.1003323)
Supplement: Table S7 — Comparison of the enrichment and significance of the GO Biological Process terms predicted in all genes versus those showing differential expression. (XLSX) [file pcbi.1003323.s015.xlsx]

## Sheet: GOBP enrichment comparison
Supporting Table S7. Comparison of the enrichment and significance of the GO Biological Process terms predicted in all genes against those showing differential expression
Category	Term	All predicted genes				Predicted genes showing differential expression
		Count	%	PValue	Fold Enrichment	Count	%	PValue	Fold Enrichment
GOTERM_BP_FAT	GO:0006468~protein amino acid phosphorylation	122	16.095	2.53752e-39	3.81475	52	8.45528	1.98042e-06	2.02573
GOTERM_BP_FAT	GO:0016310~phosphorylation	125	16.4908	3.82157e-36	3.48395	55	8.94309	5.54613e-06	1.90984
GOTERM_BP_FAT	GO:0006955~immune response	100	13.1926	4.38991e-36	4.24879	81	13.1707	3.24046e-29	4.28769
GOTERM_BP_FAT	GO:0006793~phosphorus metabolic process	137	18.0739	3.78086e-35	3.16584	67	10.8943	2.84938e-07	1.92893
GOTERM_BP_FAT	GO:0006796~phosphate metabolic process	137	18.0739	3.78086e-35	3.16584	67	10.8943	2.84938e-07	1.92893
GOTERM_BP_FAT	GO:0007242~intracellular signaling cascade	141	18.6016	5.85132e-35	3.08378	83	13.4959	2.79257e-12	2.2616
GOTERM_BP_FAT	GO:0042127~regulation of cell proliferation	103	13.5884	3.94279e-33	3.83125	75	12.1951	2.61545e-21	3.47567
GOTERM_BP_FAT	GO:0043067~regulation of programmed cell death	105	13.8522	5.5812e-33	3.75221	78	12.6829	3.80539e-22	3.47269
GOTERM_BP_FAT	GO:0010941~regulation of cell death	105	13.8522	9.00802e-33	3.73222	78	12.6829	5.30664e-22	3.45418
GOTERM_BP_FAT	GO:0042981~regulation of apoptosis	104	13.7203	9.01703e-33	3.76352	78	12.6829	1.73394e-22	3.51664
GOTERM_BP_FAT	GO:0007167~enzyme linked receptor protein signaling pathway	67	8.83905	7.1089e-28	4.91132	33	5.36585	4.89141e-08	3.01377
GOTERM_BP_FAT	GO:0019221~cytokine-mediated signaling pathway	33	4.35356	1.44913e-27	11.7927	20	3.25203	2.18935e-13	8.90433
GOTERM_BP_FAT	GO:0002684~positive regulation of immune system process	57	7.51979	1.52603e-26	5.53724	37	6.01626	5.73029e-14	4.4781
GOTERM_BP_FAT	GO:0007169~transmembrane receptor protein tyrosine kinase signaling pathway	55	7.25594	2.01024e-26	5.73254	25	4.06504	7.30579e-07	3.24637
GOTERM_BP_FAT	GO:0007243~protein kinase cascade	60	7.91557	7.95996e-26	5.08774	34	5.52846	3.31072e-10	3.59191
GOTERM_BP_FAT	GO:0008284~positive regulation of cell proliferation	64	8.44327	1.87925e-24	4.5097	40	6.50407	1.36592e-11	3.51156
GOTERM_BP_FAT	GO:0001775~cell activation	59	7.78364	5.25229e-24	4.79957	32	5.20325	1.45139e-08	3.2432
GOTERM_BP_FAT	GO:0006952~defense response	80	10.5541	1.38587e-23	3.57353	60	9.7561	4.05582e-16	3.33912
GOTERM_BP_FAT	GO:0010604~positive regulation of macromolecule metabolic process	97	12.7968	1.71288e-23	3.06658	65	10.5691	5.62205e-12	2.56017
GOTERM_BP_FAT	GO:0045321~leukocyte activation	55	7.25594	2.06552e-23	5.02579	29	4.71545	5.35349e-08	3.30151
GOTERM_BP_FAT	GO:0002694~regulation of leukocyte activation	46	6.0686	5.94075e-23	5.97755	32	5.20325	6.36854e-14	5.1807
GOTERM_BP_FAT	GO:0050865~regulation of cell activation	46	6.0686	1.06821e-22	5.90091	32	5.20325	9.21779e-14	5.11428
GOTERM_BP_FAT	GO:0010033~response to organic substance	84	11.0818	1.14676e-22	3.32869	64	10.4065	4.92449e-16	3.15971
GOTERM_BP_FAT	GO:0051249~regulation of lymphocyte activation	44	5.80475	2.13743e-22	6.11471	29	4.71545	2.60015e-12	5.02105
GOTERM_BP_FAT	GO:0001817~regulation of cytokine production	41	5.40897	2.87051e-20	5.90276	34	5.52846	4.74594e-17	6.0985
GOTERM_BP_FAT	GO:0042325~regulation of phosphorylation	59	7.78364	2.97501e-20	4.07136	40	6.50407	2.62556e-11	3.43891
GOTERM_BP_FAT	GO:0002696~positive regulation of leukocyte activation	35	4.61741	3.91778e-20	7.07487	20	3.25203	1.10846e-08	5.03679
GOTERM_BP_FAT	GO:0008283~cell proliferation	54	7.12401	4.8927e-20	4.37505	32	5.20325	1.59881e-08	3.23007
GOTERM_BP_FAT	GO:0051251~positive regulation of lymphocyte activation	34	4.48549	6.416e-20	7.2383	18	2.92683	1.63315e-07	4.77423
GOTERM_BP_FAT	GO:0050867~positive regulation of cell activation	35	4.61741	8.11428e-20	6.93478	20	3.25203	1.56432e-08	4.93705
GOTERM_BP_FAT	GO:0051098~regulation of binding	33	4.35356	1.51186e-19	7.33765	23	3.73984	4.94062e-12	6.37154
GOTERM_BP_FAT	GO:0019220~regulation of phosphate metabolic process	59	7.78364	1.93785e-19	3.92258	41	6.66667	2.09681e-11	3.39607
GOTERM_BP_FAT	GO:0051174~regulation of phosphorus metabolic process	59	7.78364	1.93785e-19	3.92258	41	6.66667	2.09681e-11	3.39607
GOTERM_BP_FAT	GO:0048584~positive regulation of response to stimulus	46	6.0686	2.38905e-19	4.94915	34	5.52846	4.24067e-13	4.55748
GOTERM_BP_FAT	GO:0009891~positive regulation of biosynthetic process	83	10.9499	2.54803e-19	2.98201	62	10.0813	5.9861e-13	2.77521
GOTERM_BP_FAT	GO:0051173~positive regulation of nitrogen compound metabolic process	80	10.5541	3.63805e-19	3.04362	58	9.43089	5.63461e-12	2.74917
GOTERM_BP_FAT	GO:0031328~positive regulation of cellular biosynthetic process	82	10.8179	5.25192e-19	2.97276	61	9.9187	1.29283e-12	2.75518
GOTERM_BP_FAT	GO:0010557~positive regulation of macromolecule biosynthetic process	79	10.4222	2.09119e-18	2.98289	57	9.26829	2.41498e-11	2.68138
GOTERM_BP_FAT	GO:0009617~response to bacterium	41	5.40897	3.4301e-18	5.22601	28	4.55285	1.25036e-10	4.44649
GOTERM_BP_FAT	GO:0051101~regulation of DNA binding	29	3.82586	4.21235e-18	7.84246	20	3.25203	5.63442e-11	6.73841
GOTERM_BP_FAT	GO:0043069~negative regulation of programmed cell death	51	6.72823	4.45204e-18	4.18279	33	5.36585	3.13788e-09	3.37197
GOTERM_BP_FAT	GO:0060548~negative regulation of cell death	51	6.72823	5.33034e-18	4.16572	33	5.36585	3.458e-09	3.3582
GOTERM_BP_FAT	GO:0043066~negative regulation of apoptosis	50	6.59631	9.47779e-18	4.18657	33	5.36585	1.86274e-09	3.44251
GOTERM_BP_FAT	GO:0010627~regulation of protein kinase cascade	40	5.27704	1.44656e-17	5.16433	25	4.06504	1.17505e-08	4.02131
GOTERM_BP_FAT	GO:0045893~positive regulation of transcription, DNA-dependent	67	8.83905	2.20523e-17	3.22305	46	7.47967	1.16517e-09	2.75692
GOTERM_BP_FAT	GO:0051254~positive regulation of RNA metabolic process	67	8.83905	3.20159e-17	3.19997	46	7.47967	1.46491e-09	2.73718
GOTERM_BP_FAT	GO:0002520~immune system development	55	7.25594	3.75158e-17	3.73101	34	5.52846	9.258e-08	2.87353
GOTERM_BP_FAT	GO:0006954~inflammatory response	47	6.20053	1.09e-16	4.18024	35	5.69106	2.02892e-11	3.87833
GOTERM_BP_FAT	GO:0045935~positive regulation of nucleobase, nucleoside, nucleotide and nucleic acid metabolic process	74	9.76253	1.28329e-16	2.90367	55	8.94309	5.16711e-11	2.68876
GOTERM_BP_FAT	GO:0051090~regulation of transcription factor activity	25	3.29815	1.46791e-16	8.47957	16	2.60163	7.02181e-09	6.76125
GOTERM_BP_FAT	GO:0046649~lymphocyte activation	43	5.67282	1.55809e-16	4.50527	20	3.25203	0.000240472	2.61069
GOTERM_BP_FAT	GO:0002237~response to molecule of bacterial origin	23	3.0343	2.13823e-16	9.39329	14	2.27642	4.10905e-08	7.12346
GOTERM_BP_FAT	GO:0050870~positive regulation of T cell activation	26	3.43008	2.55731e-16	7.88343	13	2.11382	1.02482e-05	4.91087
GOTERM_BP_FAT	GO:0009611~response to wounding	59	7.78364	2.98487e-16	3.40258	49	7.96748	3.99881e-14	3.52067
GOTERM_BP_FAT	GO:0045944~positive regulation of transcription from RNA polymerase II promoter	60	7.91557	3.10184e-16	3.35393	39	6.34146	3.98806e-08	2.71607
GOTERM_BP_FAT	GO:0043068~positive regulation of programmed cell death	49	6.46438	4.2863e-16	3.92231	42	6.82927	9.29568e-15	4.18859
GOTERM_BP_FAT	GO:0048534~hemopoietic or lymphoid organ development	52	6.86016	5.26976e-16	3.70325	34	5.52846	2.85752e-08	3.0167
GOTERM_BP_FAT	GO:0010942~positive regulation of cell death	49	6.46438	5.51384e-16	3.89118	42	6.82927	1.23819e-14	4.15535
GOTERM_BP_FAT	GO:0050863~regulation of T cell activation	32	4.22164	6.83705e-16	5.92942	20	3.25203	4.87529e-08	4.61706
GOTERM_BP_FAT	GO:0010628~positive regulation of gene expression	71	9.36675	7.26317e-16	2.91155	51	8.29268	8.85589e-10	2.60561
GOTERM_BP_FAT	GO:0044093~positive regulation of molecular function	54	7.12401	1.06323e-15	3.53149	35	5.69106	6.95194e-08	2.85171
GOTERM_BP_FAT	GO:0043065~positive regulation of apoptosis	48	6.33245	1.43076e-15	3.87325	41	6.66667	3.54645e-14	4.12184
GOTERM_BP_FAT	GO:0045941~positive regulation of transcription	69	9.1029	2.05077e-15	2.90697	50	8.13008	1.0581e-09	2.62443
GOTERM_BP_FAT	GO:0050778~positive regulation of immune response	35	4.61741	2.48408e-15	5.15009	25	4.06504	7.85152e-10	4.58311
GOTERM_BP_FAT	GO:0032944~regulation of mononuclear cell proliferation	27	3.56201	5.3138e-15	6.75398	20	3.25203	2.43683e-10	6.23303
GOTERM_BP_FAT	GO:0050670~regulation of lymphocyte proliferation	27	3.56201	5.3138e-15	6.75398	20	3.25203	2.43683e-10	6.23303
GOTERM_BP_FAT	GO:0031399~regulation of protein modification process	38	5.01319	6.22554e-15	4.60877	17	2.76423	0.000960594	2.56876
GOTERM_BP_FAT	GO:0002521~leukocyte differentiation	35	4.61741	1.0122e-14	4.93248	20	3.25203	3.7984e-06	3.51156
GOTERM_BP_FAT	GO:0070663~regulation of leukocyte proliferation	27	3.56201	1.04055e-14	6.58925	20	3.25203	3.84538e-10	6.081
GOTERM_BP_FAT	GO:0030097~hemopoiesis	47	6.20053	1.05032e-14	3.74723	31	5.04065	8.30293e-08	3.07926
GOTERM_BP_FAT	GO:0009967~positive regulation of signal transduction	38	5.01319	2.54802e-14	4.42121	26	4.22764	2.16073e-08	3.76881
GOTERM_BP_FAT	GO:0006915~apoptosis	66	8.70712	2.9105e-14	2.84038	56	9.10569	4.01243e-13	3.00258
GOTERM_BP_FAT	GO:0051094~positive regulation of developmental process	42	5.5409	6.46266e-14	3.92755	25	4.06504	5.08708e-06	2.91263
GOTERM_BP_FAT	GO:0012501~programmed cell death	66	8.70712	6.61355e-14	2.79234	56	9.10569	8.09009e-13	2.95179
GOTERM_BP_FAT	GO:0051099~positive regulation of binding	20	2.63852	1.02875e-13	8.89413	13	2.11382	1.28994e-07	7.20261
GOTERM_BP_FAT	GO:0010647~positive regulation of cell communication	39	5.14512	1.10985e-13	4.12942	27	4.39024	3.58947e-08	3.56173
GOTERM_BP_FAT	GO:0001932~regulation of protein amino acid phosphorylation	31	4.08971	1.4254e-13	5.12699	14	2.27642	0.00110484	2.88471
GOTERM_BP_FAT	GO:0042035~regulation of cytokine biosynthetic process	23	3.0343	1.80807e-13	7.19173	18	2.92683	3.26727e-10	7.01216
GOTERM_BP_FAT	GO:0042110~T cell activation	30	3.95778	2.90221e-13	5.17546	12	1.95122	0.00677008	2.57918
GOTERM_BP_FAT	GO:0001568~blood vessel development	44	5.80475	3.2561e-13	3.60868	32	5.20325	1.19431e-08	3.26978
GOTERM_BP_FAT	GO:0042108~positive regulation of cytokine biosynthetic process	19	2.5066	3.37887e-13	9.05295	13	2.11382	5.53608e-08	7.71708
GOTERM_BP_FAT	GO:0043388~positive regulation of DNA binding	19	2.5066	3.37887e-13	9.05295	13	2.11382	5.53608e-08	7.71708
GOTERM_BP_FAT	GO:0006357~regulation of transcription from RNA polymerase II promoter	76	10.0264	4.15489e-13	2.46899	57	9.26829	6.93231e-09	2.30703
GOTERM_BP_FAT	GO:0002252~immune effector process	31	4.08971	4.4937e-13	4.92353	20	3.25203	6.00659e-07	3.95748
GOTERM_BP_FAT	GO:0016265~death	68	8.97098	5.40572e-13	2.62197	57	9.26829	1.03949e-11	2.73821
GOTERM_BP_FAT	GO:0008219~cell death	67	8.83905	5.5642e-13	2.64456	57	9.26829	4.0678e-12	2.80302
GOTERM_BP_FAT	GO:0002697~regulation of immune effector process	26	3.43008	5.63273e-13	5.91257	18	2.92683	5.94404e-08	5.09975
GOTERM_BP_FAT	GO:0001944~vasculature development	44	5.80475	7.70519e-13	3.52207	33	5.36585	5.75895e-09	3.29104
GOTERM_BP_FAT	GO:0032946~positive regulation of mononuclear cell proliferation	20	2.63852	1.01364e-12	8.00471	12	1.95122	3.45587e-06	5.98371
GOTERM_BP_FAT	GO:0050671~positive regulation of lymphocyte proliferation	20	2.63852	1.01364e-12	8.00471	12	1.95122	3.45587e-06	5.98371
GOTERM_BP_FAT	GO:0051092~positive regulation of NF-kappaB transcription factor activity	15	1.97889	1.39081e-12	12.0071	10	1.62602	2.84608e-07	9.97284
GOTERM_BP_FAT	GO:0051726~regulation of cell cycle	40	5.27704	1.40839e-12	3.74052	26	4.22764	1.53482e-06	3.02913
GOTERM_BP_FAT	GO:0002250~adaptive immune response	25	3.29815	1.43472e-12	5.95589	21	3.41463	7.78804e-11	6.23303
GOTERM_BP_FAT	GO:0002460~adaptive immune response based on somatic recombination of immune receptors built from immunoglobulin superfamily domains	25	3.29815	1.43472e-12	5.95589	21	3.41463	7.78804e-11	6.23303
GOTERM_BP_FAT	GO:0006917~induction of apoptosis	35	4.61741	1.53879e-12	4.19409	27	4.39024	2.55274e-09	4.03094
GOTERM_BP_FAT	GO:0012502~induction of programmed cell death	35	4.61741	1.53879e-12	4.19409	27	4.39024	2.55274e-09	4.03094
GOTERM_BP_FAT	GO:0048732~gland development	38	5.01319	2.08151e-12	3.86014	23	3.73984	1.34099e-05	2.91086
GOTERM_BP_FAT	GO:0045619~regulation of lymphocyte differentiation	21	2.77045	2.1452e-12	7.24565	12	1.95122	1.5757e-05	5.15837
GOTERM_BP_FAT	GO:0070665~positive regulation of leukocyte proliferation	20	2.63852	2.31656e-12	7.69684	12	1.95122	5.19682e-06	5.75356
GOTERM_BP_FAT	GO:0048514~blood vessel morphogenesis	38	5.01319	2.44138e-12	3.84065	28	4.55285	2.36422e-08	3.52575
GOTERM_BP_FAT	GO:0006935~chemotaxis	28	3.69393	2.44804e-12	5.14064	16	2.60163	2.81724e-05	3.65976
GOTERM_BP_FAT	GO:0042330~taxis	28	3.69393	2.44804e-12	5.14064	16	2.60163	2.81724e-05	3.65976
GOTERM_BP_FAT	GO:0010740~positive regulation of protein kinase cascade	25	3.29815	4.35732e-12	5.68517	19	3.08943	9.40597e-09	5.38307
GOTERM_BP_FAT	GO:0031663~lipopolysaccharide-mediated signaling pathway	11	1.45119	5.40789e-12	18.3441	4	0.650407	0.0107129	8.3107
GOTERM_BP_FAT	GO:0045597~positive regulation of cell differentiation	35	4.61741	6.17068e-12	4.00236	20	3.25203	7.55988e-05	2.84938
GOTERM_BP_FAT	GO:0000165~MAPKKK cascade	28	3.69393	7.67427e-12	4.91517	14	2.27642	0.000628985	3.06184
GOTERM_BP_FAT	GO:0001819~positive regulation of cytokine production	21	2.77045	8.85242e-12	6.77818	17	2.76423	1.73347e-09	6.83622
GOTERM_BP_FAT	GO:0044092~negative regulation of molecular function	30	3.95778	9.5332e-12	4.54813	29	4.71545	2.70693e-13	5.47751
GOTERM_BP_FAT	GO:0032496~response to lipopolysaccharide	17	2.24274	9.86703e-12	8.95264	6	0.97561	0.0170216	3.93665
GOTERM_BP_FAT	GO:0032268~regulation of cellular protein metabolic process	45	5.93668	9.95834e-12	3.21618	22	3.57724	0.00437628	1.95895
GOTERM_BP_FAT	GO:0042592~homeostatic process	70	9.23483	1.58213e-11	2.39867	44	7.15447	8.21908e-05	1.87845
GOTERM_BP_FAT	GO:0043408~regulation of MAPKKK cascade	25	3.29815	1.59031e-11	5.37951	15	2.43902	1.85164e-05	4.02131
GOTERM_BP_FAT	GO:0030879~mammary gland development	24	3.16623	1.90121e-11	5.58468	13	2.11382	0.000153765	3.76881
GOTERM_BP_FAT	GO:0051091~positive regulation of transcription factor activity	16	2.11082	1.94511e-11	9.41731	10	1.62602	5.2913e-06	7.33297
GOTERM_BP_FAT	GO:0009719~response to endogenous stimulus	35	4.61741	2.65154e-11	3.80659	31	5.04065	4.60149e-11	4.20052
GOTERM_BP_FAT	GO:0002443~leukocyte mediated immunity	24	3.16623	4.0941e-11	5.39644	16	2.60163	2.2136e-06	4.48218
GOTERM_BP_FAT	GO:0030098~lymphocyte differentiation	27	3.56201	4.67406e-11	4.73963	14	2.27642	0.000628985	3.06184
GOTERM_BP_FAT	GO:0002449~lymphocyte mediated immunity	22	2.90237	7.31963e-11	5.79288	16	2.60163	2.66409e-07	5.24887
GOTERM_BP_FAT	GO:0050864~regulation of B cell activation	19	2.5066	7.46402e-11	6.91316	11	1.78862	5.60507e-05	4.98642
GOTERM_BP_FAT	GO:0035295~tube development	42	5.5409	7.56818e-11	3.18369	27	4.39024	2.18095e-05	2.54987
GOTERM_BP_FAT	GO:0043549~regulation of kinase activity	35	4.61741	8.9113e-11	3.64798	29	4.71545	2.83516e-09	3.76579
GOTERM_BP_FAT	GO:0007610~behavior	54	7.12401	1.00095e-10	2.66824	31	5.04065	0.000894742	1.90838
GOTERM_BP_FAT	GO:0002819~regulation of adaptive immune response	19	2.5066	1.04942e-10	6.78971	12	1.95122	1.10796e-05	5.3426
GOTERM_BP_FAT	GO:0002822~regulation of adaptive immune response based on somatic recombination of immune receptors built from immunoglobulin superfamily domains	19	2.5066	1.04942e-10	6.78971	12	1.95122	1.10796e-05	5.3426
GOTERM_BP_FAT	GO:0032675~regulation of interleukin-6 production	15	1.97889	1.06135e-10	9.38052	14	2.27642	1.01712e-10	10.9078
GOTERM_BP_FAT	GO:0009725~response to hormone stimulus	32	4.22164	1.30212e-10	3.88107	29	4.71545	7.82265e-11	4.38201
GOTERM_BP_FAT	GO:0002253~activation of immune response	23	3.0343	1.35064e-10	5.35199	15	2.43902	7.32769e-06	4.34862
GOTERM_BP_FAT	GO:0032870~cellular response to hormone stimulus	19	2.5066	2.02432e-10	6.55558	12	1.95122	1.5757e-05	5.15837
GOTERM_BP_FAT	GO:0048585~negative regulation of response to stimulus	20	2.63852	2.02594e-10	6.15747	13	2.11382	8.69637e-06	4.98642
GOTERM_BP_FAT	GO:0051338~regulation of transferase activity	35	4.61741	2.42684e-10	3.51966	29	4.71545	6.41506e-09	3.63332
GOTERM_BP_FAT	GO:0002764~immune response-regulating signal transduction	18	2.37467	2.57278e-10	6.92716	12	1.95122	5.19682e-06	5.75356
GOTERM_BP_FAT	GO:0045621~positive regulation of lymphocyte differentiation	15	1.97889	2.85495e-10	8.82873	7	1.13821	0.0020696	5.13308
GOTERM_BP_FAT	GO:0050730~regulation of peptidyl-tyrosine phosphorylation	18	2.37467	3.61403e-10	6.79645	9	1.46341	0.00113328	4.23375
GOTERM_BP_FAT	GO:0008285~negative regulation of cell proliferation	37	4.88127	4.19798e-10	3.30552	31	5.04065	5.98579e-09	3.45043
GOTERM_BP_FAT	GO:0001892~embryonic placenta development	19	2.5066	5.12687e-10	6.23318	13	2.11382	4.35236e-06	5.3134
GOTERM_BP_FAT	GO:0002757~immune response-activating signal transduction	17	2.24274	6.26152e-10	7.08751	11	1.78862	1.61248e-05	5.71361
GOTERM_BP_FAT	GO:0045580~regulation of T cell differentiation	17	2.24274	6.26152e-10	7.08751	9	1.46341	0.000574842	4.67477
GOTERM_BP_FAT	GO:0010648~negative regulation of cell communication	33	4.35356	6.87094e-10	3.55048	21	3.41463	5.65205e-05	2.81492
GOTERM_BP_FAT	GO:0045859~regulation of protein kinase activity	33	4.35356	6.87094e-10	3.55048	29	4.71545	1.36046e-09	3.88726
GOTERM_BP_FAT	GO:0001890~placenta development	22	2.90237	1.13555e-09	5.06045	15	2.43902	8.41775e-06	4.29864
GOTERM_BP_FAT	GO:0043009~chordate embryonic development	53	6.99208	1.22944e-09	2.5193	42	6.82927	1.27741e-07	2.48729
GOTERM_BP_FAT	GO:0031349~positive regulation of defense response	18	2.37467	1.29476e-09	6.31951	16	2.60163	4.1811e-09	6.99849
GOTERM_BP_FAT	GO:0001701~in utero embryonic development	40	5.27704	1.39354e-09	2.99802	35	5.69106	2.1791e-09	3.26825
GOTERM_BP_FAT	GO:0009968~negative regulation of signal transduction	31	4.08971	1.45436e-09	3.62787	21	3.41463	1.66775e-05	3.06184
GOTERM_BP_FAT	GO:0045582~positive regulation of T cell differentiation	14	1.84697	1.52925e-09	8.75515	6	0.97561	0.0083043	4.67477
GOTERM_BP_FAT	GO:0009792~embryonic development ending in birth or egg hatching	53	6.99208	1.70702e-09	2.49559	42	6.82927	1.65316e-07	2.46388
GOTERM_BP_FAT	GO:0032680~regulation of tumor necrosis factor production	13	1.71504	1.88462e-09	9.6353	9	1.46341	7.09159e-06	8.3107
GOTERM_BP_FAT	GO:0051240~positive regulation of multicellular organismal process	30	3.95778	1.95324e-09	3.68315	21	3.41463	8.12071e-06	3.21211
GOTERM_BP_FAT	GO:0060429~epithelium development	40	5.27704	2.15695e-09	2.95377	29	4.71545	4.24201e-06	2.66801
GOTERM_BP_FAT	GO:0042129~regulation of T cell proliferation	18	2.37467	2.34257e-09	6.10529	12	1.95122	1.86784e-05	5.07094
GOTERM_BP_FAT	GO:0001776~leukocyte homeostasis	15	1.97889	2.45123e-09	7.69684	8	1.30081	0.000799417	5.11428
GOTERM_BP_FAT	GO:0030217~T cell differentiation	20	2.63852	3.74687e-09	5.26626	9	1.46341	0.0108425	2.95249
GOTERM_BP_FAT	GO:0043410~positive regulation of MAPKKK cascade	16	2.11082	4.29151e-09	6.81252	11	1.78862	1.32338e-05	5.83517
GOTERM_BP_FAT	GO:0002274~myeloid leukocyte activation	14	1.84697	5.65521e-09	8.00471	11	1.78862	7.23602e-07	7.83581
GOTERM_BP_FAT	GO:0042102~positive regulation of T cell proliferation	14	1.84697	5.65521e-09	8.00471	8	1.30081	0.000401413	5.69877
GOTERM_BP_FAT	GO:0002703~regulation of leukocyte mediated immunity	19	2.5066	5.93722e-09	5.43177	13	2.11382	1.91428e-05	4.63025
GOTERM_BP_FAT	GO:0043434~response to peptide hormone stimulus	22	2.90237	6.27937e-09	4.63431	15	2.43902	2.37104e-05	3.93665
GOTERM_BP_FAT	GO:0048872~homeostasis of number of cells	24	3.16623	6.51949e-09	4.25029	14	2.27642	0.000577872	3.08893
GOTERM_BP_FAT	GO:0045596~negative regulation of cell differentiation	31	4.08971	6.66456e-09	3.4086	21	3.41463	4.14429e-05	2.87678
GOTERM_BP_FAT	GO:0019882~antigen processing and presentation	21	2.77045	7.02798e-09	4.83043	22	3.57724	1.96665e-11	6.30467
GOTERM_BP_FAT	GO:0051789~response to protein stimulus	21	2.77045	7.02798e-09	4.83043	16	2.60163	1.64384e-06	4.58522
GOTERM_BP_FAT	GO:0002260~lymphocyte homeostasis	13	1.71504	8.16411e-09	8.67177	7	1.13821	0.00104636	5.81749
GOTERM_BP_FAT	GO:0043085~positive regulation of catalytic activity	38	5.01319	8.48196e-09	2.91359	24	3.90244	0.000337192	2.29261
GOTERM_BP_FAT	GO:0007626~locomotory behavior	36	4.74934	9.20134e-09	3.01433	21	3.41463	0.00152019	2.19069
GOTERM_BP_FAT	GO:0016477~cell migration	36	4.74934	1.03171e-08	3.00177	25	4.06504	3.50636e-05	2.59709
GOTERM_BP_FAT	GO:0006984~ER-nuclear signaling pathway	12	1.58311	1.03415e-08	9.60566	5	0.813008	0.0164669	4.98642
GOTERM_BP_FAT	GO:0002706~regulation of lymphocyte mediated immunity	18	2.37467	1.19014e-08	5.54172	11	1.78862	0.000239626	4.21928
GOTERM_BP_FAT	GO:0019724~B cell mediated immunity	18	2.37467	1.19014e-08	5.54172	14	2.27642	1.42701e-06	5.36999
GOTERM_BP_FAT	GO:0070482~response to oxygen levels	18	2.37467	1.19014e-08	5.54172	15	2.43902	2.13438e-07	5.75356
GOTERM_BP_FAT	GO:0050871~positive regulation of B cell activation	14	1.84697	1.24381e-08	7.57203	6	0.97561	0.0152703	4.04304
GOTERM_BP_FAT	GO:0043330~response to exogenous dsRNA	9	1.18734	1.52843e-08	15.0088	4	0.650407	0.0107129	8.3107
GOTERM_BP_FAT	GO:0034976~response to endoplasmic reticulum stress	12	1.58311	1.71211e-08	9.23621	5	0.813008	0.0188603	4.79464
GOTERM_BP_FAT	GO:0032868~response to insulin stimulus	17	2.24274	1.8209e-08	5.76611	12	1.95122	1.86784e-05	5.07094
GOTERM_BP_FAT	GO:0080135~regulation of cellular response to stress	19	2.5066	1.93522e-08	5.06965	10	1.62602	0.00295498	3.32428
GOTERM_BP_FAT	GO:0046328~regulation of JNK cascade	15	1.97889	2.05125e-08	6.67059	9	1.46341	0.000364831	4.98642
GOTERM_BP_FAT	GO:0022612~gland morphogenesis	20	2.63852	2.22142e-08	4.76471	13	2.11382	0.000122186	3.85854
GOTERM_BP_FAT	GO:0035239~tube morphogenesis	29	3.82586	2.47071e-08	3.39381	23	3.73984	1.29609e-06	3.35344
GOTERM_BP_FAT	GO:0070302~regulation of stress-activated protein kinase signaling pathway	15	1.97889	2.81473e-08	6.52558	9	1.46341	0.000426397	4.87802
GOTERM_BP_FAT	GO:0043122~regulation of I-kappaB kinase/NF-kappaB cascade	14	1.84697	3.65622e-08	7.00412	9	1.46341	0.000155192	5.60972
GOTERM_BP_FAT	GO:0019884~antigen processing and presentation of exogenous antigen	12	1.58311	4.34148e-08	8.57648	14	2.27642	1.27076e-11	12.4661
GOTERM_BP_FAT	GO:0051252~regulation of RNA metabolic process	121	15.9631	4.73667e-08	1.6273	94	15.2846	7.14581e-06	1.57501
GOTERM_BP_FAT	GO:0001763~morphogenesis of a branching structure	24	3.16623	4.82305e-08	3.84226	18	2.92683	9.80941e-06	3.59022
GOTERM_BP_FAT	GO:0016064~immunoglobulin mediated immune response	17	2.24274	5.04405e-08	5.4	13	2.11382	6.19745e-06	5.14472
GOTERM_BP_FAT	GO:0001666~response to hypoxia	17	2.24274	6.41839e-08	5.31563	14	2.27642	1.18429e-06	5.4539
GOTERM_BP_FAT	GO:0046651~lymphocyte proliferation	14	1.84697	7.06797e-08	6.67059	5	0.813008	0.0861174	2.96811
GOTERM_BP_FAT	GO:0048729~tissue morphogenesis	34	4.48549	9.46537e-08	2.85883	23	3.73984	0.000229105	2.40941
GOTERM_BP_FAT	GO:0001816~cytokine production	14	1.84697	9.67257e-08	6.51546	12	1.95122	6.86427e-07	6.9578
GOTERM_BP_FAT	GO:0032869~cellular response to insulin stimulus	14	1.84697	9.67257e-08	6.51546	9	1.46341	0.000263305	5.21835
GOTERM_BP_FAT	GO:0032943~mononuclear cell proliferation	14	1.84697	9.67257e-08	6.51546	5	0.813008	0.0921024	2.89908
GOTERM_BP_FAT	GO:0050900~leukocyte migration	14	1.84697	9.67257e-08	6.51546	5	0.813008	0.0921024	2.89908
GOTERM_BP_FAT	GO:0070661~leukocyte proliferation	14	1.84697	9.67257e-08	6.51546	5	0.813008	0.0921024	2.89908
GOTERM_BP_FAT	GO:0046777~protein amino acid autophosphorylation	17	2.24274	1.02363e-07	5.15455	7	1.13821	0.0481151	2.64431
GOTERM_BP_FAT	GO:0045637~regulation of myeloid cell differentiation	15	1.97889	1.20242e-07	5.88582	10	1.62602	0.000167312	4.88865
GOTERM_BP_FAT	GO:0043405~regulation of MAP kinase activity	19	2.5066	1.26177e-07	4.52647	12	1.95122	0.000502562	3.56173
GOTERM_BP_FAT	GO:0051050~positive regulation of transport	24	3.16623	1.37082e-07	3.63851	15	2.43902	0.000820633	2.83319
GOTERM_BP_FAT	GO:0033554~cellular response to stress	47	6.20053	1.38663e-07	2.3281	33	5.36585	0.000187597	2.03653
GOTERM_BP_FAT	GO:0002683~negative regulation of immune system process	18	2.37467	1.45492e-07	4.73963	13	2.11382	4.48656e-05	4.2647
GOTERM_BP_FAT	GO:0009615~response to virus	18	2.37467	1.45492e-07	4.73963	10	1.62602	0.00323609	3.28054
GOTERM_BP_FAT	GO:0001525~angiogenesis	24	3.16623	1.58105e-07	3.61115	17	2.76423	8.19368e-05	3.18681
GOTERM_BP_FAT	GO:0032655~regulation of interleukin-12 production	9	1.18734	1.73746e-07	12.0071	8	1.30081	7.71578e-07	13.2971
GOTERM_BP_FAT	GO:0032494~response to peptidoglycan	8	1.05541	2.06783e-07	14.554	7	1.13821	1.55905e-06	15.8659
GOTERM_BP_FAT	GO:0030099~myeloid cell differentiation	20	2.63852	2.1486e-07	4.16912	15	2.43902	2.6758e-05	3.89564
GOTERM_BP_FAT	GO:0042113~B cell activation	18	2.37467	2.17419e-07	4.6181	9	1.46341	0.012584	2.87678
GOTERM_BP_FAT	GO:0006355~regulation of transcription, DNA-dependent	117	15.4354	2.21423e-07	1.59821	90	14.6341	3.5152e-05	1.53167
GOTERM_BP_FAT	GO:0048870~cell motility	37	4.88127	2.43444e-07	2.60717	26	4.22764	0.000192624	2.28252
GOTERM_BP_FAT	GO:0051674~localization of cell	37	4.88127	2.43444e-07	2.60717	26	4.22764	0.000192624	2.28252
GOTERM_BP_FAT	GO:0006916~anti-apoptosis	19	2.5066	2.66025e-07	4.32073	12	1.95122	0.000749995	3.39983
GOTERM_BP_FAT	GO:0045087~innate immune response	21	2.77045	2.7608e-07	3.92755	16	2.60163	2.252e-05	3.72817
GOTERM_BP_FAT	GO:0043123~positive regulation of I-kappaB kinase/NF-kappaB cascade	12	1.58311	3.11153e-07	7.27701	8	1.30081	0.000273334	6.04415
GOTERM_BP_FAT	GO:0045577~regulation of B cell differentiation	9	1.18734	3.32309e-07	11.2566	4	0.650407	0.0242188	6.23303
GOTERM_BP_FAT	GO:0030595~leukocyte chemotaxis	11	1.45119	3.48728e-07	8.15295	4	0.650407	0.0918	3.69365
GOTERM_BP_FAT	GO:0060326~cell chemotaxis	11	1.45119	3.48728e-07	8.15295	4	0.650407	0.0918	3.69365
GOTERM_BP_FAT	GO:0045449~regulation of transcription	161	21.2401	4.25258e-07	1.44674	140	22.7642	1.74801e-08	1.56735
GOTERM_BP_FAT	GO:0006928~cell motion	43	5.67282	4.288e-07	2.3447	29	4.71545	0.000839405	1.97011
GOTERM_BP_FAT	GO:0007249~I-kappaB kinase/NF-kappaB cascade	11	1.45119	5.18346e-07	7.86177	7	1.13821	0.000710572	6.23303
GOTERM_BP_FAT	GO:0007259~JAK-STAT cascade	11	1.45119	5.18346e-07	7.86177	6	0.97561	0.00462086	5.3426
GOTERM_BP_FAT	GO:0042098~T cell proliferation	11	1.45119	5.18346e-07	7.86177	4	0.650407	0.0999043	3.56173
GOTERM_BP_FAT	GO:0050727~regulation of inflammatory response	15	1.97889	5.41766e-07	5.26626	14	2.27642	2.85439e-07	6.12368
GOTERM_BP_FAT	GO:0032101~regulation of response to external stimulus	20	2.63852	6.76671e-07	3.88578	15	2.43902	5.95201e-05	3.63089
GOTERM_BP_FAT	GO:0002478~antigen processing and presentation of exogenous peptide antigen	10	1.31926	7.90663e-07	8.70077	12	1.95122	3.34699e-10	13.0081
GOTERM_BP_FAT	GO:0045089~positive regulation of innate immune response	12	1.58311	8.42005e-07	6.67059	9	1.46341	7.03121e-05	6.23303
GOTERM_BP_FAT	GO:0032755~positive regulation of interleukin-6 production	9	1.18734	1.03334e-06	10.0059	8	1.30081	3.43501e-06	11.0809
GOTERM_BP_FAT	GO:0002768~immune response-regulating cell surface receptor signaling pathway	13	1.71504	1.04455e-06	5.91257	9	1.46341	0.0003107	5.09975
GOTERM_BP_FAT	GO:0032844~regulation of homeostatic process	15	1.97889	1.0627e-06	5.00295	7	1.13821	0.0322993	2.90875
GOTERM_BP_FAT	GO:0051100~negative regulation of binding	11	1.45119	1.08361e-06	7.33765	10	1.62602	1.66573e-06	8.3107
GOTERM_BP_FAT	GO:0018108~peptidyl-tyrosine phosphorylation	12	1.58311	1.14467e-06	6.49031	8	1.30081	0.000573439	5.39073
GOTERM_BP_FAT	GO:0018212~peptidyl-tyrosine modification	12	1.58311	1.14467e-06	6.49031	8	1.30081	0.000573439	5.39073
GOTERM_BP_FAT	GO:0031401~positive regulation of protein modification process	17	2.24274	1.17562e-06	4.36154	7	1.13821	0.0919987	2.2375
GOTERM_BP_FAT	GO:0045444~fat cell differentiation	15	1.97889	1.31678e-06	4.92093	12	1.95122	2.59526e-05	4.90468
GOTERM_BP_FAT	GO:0007595~lactation	11	1.45119	1.52858e-06	7.10095	5	0.813008	0.0339621	4.02131
GOTERM_BP_FAT	GO:0002009~morphogenesis of an epithelium	26	3.43008	1.56003e-06	3.00755	18	2.92683	0.000579544	2.59409
GOTERM_BP_FAT	GO:0051247~positive regulation of protein metabolic process	20	2.63852	1.66097e-06	3.67189	9	1.46341	0.0709004	2.05861
GOTERM_BP_FAT	GO:0043523~regulation of neuron apoptosis	17	2.24274	1.67871e-06	4.2525	8	1.30081	0.0408505	2.49321
GOTERM_BP_FAT	GO:0045088~regulation of innate immune response	13	1.71504	1.75785e-06	5.6555	10	1.62602	7.23941e-05	5.42002
GOTERM_BP_FAT	GO:0002218~activation of innate immune response	8	1.05541	1.88436e-06	11.4353	6	0.97561	0.000149642	10.6852
GOTERM_BP_FAT	GO:0032270~positive regulation of cellular protein metabolic process	19	2.5066	1.92267e-06	3.80224	9	1.46341	0.0470733	2.24389
GOTERM_BP_FAT	GO:0051051~negative regulation of transport	16	2.11082	2.05926e-06	4.44706	12	1.95122	0.000126025	4.15535
GOTERM_BP_FAT	GO:0043086~negative regulation of catalytic activity	19	2.5066	2.23267e-06	3.76459	20	3.25203	1.56432e-08	4.93705
GOTERM_BP_FAT	GO:0002221~pattern recognition receptor signaling pathway	7	0.923483	2.66888e-06	14.0082	5	0.813008	0.000439999	12.4661
GOTERM_BP_FAT	GO:0046626~regulation of insulin receptor signaling pathway	7	0.923483	2.66888e-06	14.0082	5	0.813008	0.000439999	12.4661
GOTERM_BP_FAT	GO:0002705~positive regulation of leukocyte mediated immunity	12	1.58311	2.69846e-06	6.00353	8	1.30081	0.00093607	4.98642
GOTERM_BP_FAT	GO:0002708~positive regulation of lymphocyte mediated immunity	12	1.58311	2.69846e-06	6.00353	8	1.30081	0.00093607	4.98642
GOTERM_BP_FAT	GO:0032760~positive regulation of tumor necrosis factor production	8	1.05541	3.38115e-06	10.673	6	0.97561	0.000217104	9.97284
GOTERM_BP_FAT	GO:0045576~mast cell activation	8	1.05541	3.38115e-06	10.673	6	0.97561	0.000217104	9.97284
GOTERM_BP_FAT	GO:0002429~immune response-activating cell surface receptor signaling pathway	12	1.58311	3.52324e-06	5.85711	8	1.30081	0.00109047	4.8648
GOTERM_BP_FAT	GO:0002573~myeloid leukocyte differentiation	11	1.45119	3.9439e-06	6.4744	8	1.30081	0.000332461	5.86638
GOTERM_BP_FAT	GO:0048002~antigen processing and presentation of peptide antigen	11	1.45119	5.27663e-06	6.28942	13	2.11382	5.40037e-09	9.2605
GOTERM_BP_FAT	GO:0060711~labyrinthine layer development	11	1.45119	5.27663e-06	6.28942	8	1.30081	0.000401413	5.69877
GOTERM_BP_FAT	GO:0008286~insulin receptor signaling pathway	10	1.31926	5.33529e-06	7.14707	6	0.97561	0.00462086	5.3426
GOTERM_BP_FAT	GO:0032642~regulation of chemokine production	7	0.923483	5.6234e-06	12.7348	5	0.813008	0.000669614	11.3328
GOTERM_BP_FAT	GO:0052547~regulation of peptidase activity	13	1.71504	5.70067e-06	5.10104	9	1.46341	0.000873219	4.39978
GOTERM_BP_FAT	GO:0046330~positive regulation of JNK cascade	8	1.05541	5.75247e-06	10.0059	6	0.97561	0.000305444	9.34954
GOTERM_BP_FAT	GO:0070304~positive regulation of stress-activated protein kinase signaling pathway	8	1.05541	5.75247e-06	10.0059	6	0.97561	0.000305444	9.34954
GOTERM_BP_FAT	GO:0002224~toll-like receptor signaling pathway	6	0.791557	5.8869e-06	17.153	4	0.650407	0.00197961	14.2469
GOTERM_BP_FAT	GO:0045073~regulation of chemokine biosynthetic process	6	0.791557	5.8869e-06	17.153	3	0.487805	0.0293904	10.6852
GOTERM_BP_FAT	GO:0042742~defense response to bacterium	19	2.5066	6.00588e-06	3.52059	16	2.60163	2.52067e-05	3.69365
GOTERM_BP_FAT	GO:0042327~positive regulation of phosphorylation	14	1.84697	6.23147e-06	4.66942	7	1.13821	0.0322993	2.90875
GOTERM_BP_FAT	GO:0043331~response to dsRNA	9	1.18734	6.31839e-06	8.18664	4	0.650407	0.0558576	4.53311
GOTERM_BP_FAT	GO:0033674~positive regulation of kinase activity	21	2.77045	6.559e-06	3.23267	14	2.27642	0.00212623	2.685
GOTERM_BP_FAT	GO:0044057~regulation of system process	27	3.56201	7.8437e-06	2.68815	14	2.27642	0.0607174	1.73656
GOTERM_BP_FAT	GO:0009628~response to abiotic stimulus	31	4.08971	8.14915e-06	2.47157	19	3.08943	0.0123334	1.88729
GOTERM_BP_FAT	GO:0032880~regulation of protein localization	17	2.24274	8.39134e-06	3.78	13	2.11382	0.000238248	3.6013
GOTERM_BP_FAT	GO:0002695~negative regulation of leukocyte activation	13	1.71504	8.74013e-06	4.90855	11	1.78862	4.01531e-05	5.17459
GOTERM_BP_FAT	GO:0050866~negative regulation of cell activation	13	1.71504	8.74013e-06	4.90855	11	1.78862	4.01531e-05	5.17459
GOTERM_BP_FAT	GO:0010562~positive regulation of phosphorus metabolic process	14	1.84697	9.1381e-06	4.51879	7	1.13821	0.0371295	2.81492
GOTERM_BP_FAT	GO:0045937~positive regulation of phosphate metabolic process	14	1.84697	9.1381e-06	4.51879	7	1.13821	0.0371295	2.81492
GOTERM_BP_FAT	GO:0051130~positive regulation of cellular component organization	20	2.63852	9.26895e-06	3.28062	15	2.43902	0.000369084	3.06542
GOTERM_BP_FAT	GO:0030968~endoplasmic reticulum unfolded protein response	8	1.05541	9.359e-06	9.41731	4	0.650407	0.028554	5.86638
GOTERM_BP_FAT	GO:0034620~cellular response to unfolded protein	8	1.05541	9.359e-06	9.41731	4	0.650407	0.028554	5.86638
GOTERM_BP_FAT	GO:0048568~embryonic organ development	30	3.95778	1.00921e-05	2.49109	20	3.25203	0.00384563	2.06905
GOTERM_BP_FAT	GO:0002712~regulation of B cell mediated immunity	10	1.31926	1.01013e-05	6.67059	6	0.97561	0.00627447	4.98642
GOTERM_BP_FAT	GO:0002889~regulation of immunoglobulin mediated immune response	10	1.31926	1.01013e-05	6.67059	6	0.97561	0.00627447	4.98642
GOTERM_BP_FAT	GO:0002758~innate immune response-activating signal transduction	7	0.923483	1.07719e-05	11.6735	5	0.813008	0.000972777	10.3884
GOTERM_BP_FAT	GO:0051347~positive regulation of transferase activity	21	2.77045	1.172e-05	3.11294	14	2.27642	0.00296842	2.58555
GOTERM_BP_FAT	GO:0002699~positive regulation of immune effector process	12	1.58311	1.18421e-05	5.22046	9	1.46341	0.000426397	4.87802
GOTERM_BP_FAT	GO:0048754~branching morphogenesis of a tube	17	2.24274	1.29474e-05	3.65807	12	1.95122	0.00119384	3.21705
GOTERM_BP_FAT	GO:0010605~negative regulation of macromolecule metabolic process	49	6.46438	1.37744e-05	1.9379	46	7.47967	4.27091e-07	2.26656
GOTERM_BP_FAT	GO:0007264~small GTPase mediated signal transduction	31	4.08971	1.40984e-05	2.40452	20	3.25203	0.00790046	1.93272
GOTERM_BP_FAT	GO:0043029~T cell homeostasis	8	1.05541	1.46571e-05	8.89413	4	0.650407	0.0332713	5.54047
GOTERM_BP_FAT	GO:0045579~positive regulation of B cell differentiation	6	0.791557	1.50518e-05	15.0088	3	0.487805	0.0381627	9.34954
GOTERM_BP_FAT	GO:0008624~induction of apoptosis by extracellular signals	9	1.18734	1.87016e-05	7.20424	6	0.97561	0.00275732	5.98371
GOTERM_BP_FAT	GO:0045639~positive regulation of myeloid cell differentiation	9	1.18734	1.87016e-05	7.20424	5	0.813008	0.0164669	4.98642
GOTERM_BP_FAT	GO:0045408~regulation of interleukin-6 biosynthetic process	7	0.923483	1.91611e-05	10.7756	7	1.13821	5.40565e-06	13.425
GOTERM_BP_FAT	GO:0019216~regulation of lipid metabolic process	13	1.71504	2.3234e-05	4.4854	8	1.30081	0.0081365	3.43891
GOTERM_BP_FAT	GO:0043392~negative regulation of DNA binding	9	1.18734	2.58397e-05	6.92716	8	1.30081	5.36896e-05	7.67142
GOTERM_BP_FAT	GO:0050673~epithelial cell proliferation	9	1.18734	2.58397e-05	6.92716	4	0.650407	0.0839843	3.83571
GOTERM_BP_FAT	GO:0043281~regulation of caspase activity	12	1.58311	2.76338e-05	4.80283	8	1.30081	0.00355405	3.98914
GOTERM_BP_FAT	GO:0052548~regulation of endopeptidase activity	12	1.58311	2.76338e-05	4.80283	8	1.30081	0.00355405	3.98914
GOTERM_BP_FAT	GO:0032606~type I interferon production	5	0.659631	2.95133e-05	20.0118	3	0.487805	0.0147611	14.9593
GOTERM_BP_FAT	GO:0042590~antigen processing and presentation of exogenous peptide antigen via MHC class I	5	0.659631	2.95133e-05	20.0118	4	0.650407	0.000600781	19.9457
GOTERM_BP_FAT	GO:0045351~type I interferon biosynthetic process	5	0.659631	2.95133e-05	20.0118	3	0.487805	0.0147611	14.9593
GOTERM_BP_FAT	GO:0002821~positive regulation of adaptive immune response	10	1.31926	3.0945e-05	5.88582	8	1.30081	0.000332461	5.86638
GOTERM_BP_FAT	GO:0002824~positive regulation of adaptive immune response based on somatic recombination of immune receptors built from immunoglobulin superfamily domains	10	1.31926	3.0945e-05	5.88582	8	1.30081	0.000332461	5.86638
GOTERM_BP_FAT	GO:0045075~regulation of interleukin-12 biosynthetic process	6	0.791557	3.24731e-05	13.3412	5	0.813008	0.000272611	13.8512
GOTERM_BP_FAT	GO:0048009~insulin-like growth factor receptor signaling pathway	6	0.791557	3.24731e-05	13.3412	4	0.650407	0.00447401	11.0809
GOTERM_BP_FAT	GO:0006469~negative regulation of protein kinase activity	12	1.58311	3.36654e-05	4.70865	15	2.43902	7.58632e-09	7.33297
GOTERM_BP_FAT	GO:0033673~negative regulation of kinase activity	12	1.58311	3.36654e-05	4.70865	15	2.43902	7.58632e-09	7.33297
GOTERM_BP_FAT	GO:0060562~epithelial tube morphogenesis	18	2.37467	3.38651e-05	3.24515	13	2.11382	0.00160596	2.91998
GOTERM_BP_FAT	GO:0001570~vasculogenesis	11	1.45119	3.83653e-05	5.11929	6	0.97561	0.0277634	3.4789
GOTERM_BP_FAT	GO:0008629~induction of apoptosis by intracellular signals	10	1.31926	3.98302e-05	5.71765	7	1.13821	0.00241474	4.98642
GOTERM_BP_FAT	GO:0031098~stress-activated protein kinase signaling pathway	10	1.31926	3.98302e-05	5.71765	5	0.813008	0.0499319	3.56173
GOTERM_BP_FAT	GO:0051250~negative regulation of lymphocyte activation	12	1.58311	4.07984e-05	4.6181	10	1.62602	0.000195262	4.79464
GOTERM_BP_FAT	GO:0045860~positive regulation of protein kinase activity	19	2.5066	4.19306e-05	3.06632	14	2.27642	0.00138558	2.81492
GOTERM_BP_FAT	GO:0051348~negative regulation of transferase activity	12	1.58311	4.91946e-05	4.53097	15	2.43902	1.31026e-08	7.05626
GOTERM_BP_FAT	GO:0050851~antigen receptor-mediated signaling pathway	10	1.31926	5.07795e-05	5.55883	6	0.97561	0.0136436	4.15535
GOTERM_BP_FAT	GO:0051781~positive regulation of cell division	10	1.31926	5.07795e-05	5.55883	5	0.813008	0.0544679	3.46279
GOTERM_BP_FAT	GO:0006986~response to unfolded protein	12	1.58311	5.90334e-05	4.44706	8	1.30081	0.00549436	3.69365
GOTERM_BP_FAT	GO:0043433~negative regulation of transcription factor activity	8	1.05541	6.59223e-05	7.27701	7	1.13821	0.000172656	7.93294
GOTERM_BP_FAT	GO:0001910~regulation of leukocyte mediated cytotoxicity	9	1.18734	8.10685e-05	6.00353	5	0.813008	0.0305141	4.15535
GOTERM_BP_FAT	GO:0002700~regulation of production of molecular mediator of immune response	9	1.18734	8.10685e-05	6.00353	6	0.97561	0.00627447	4.98642
GOTERM_BP_FAT	GO:0031341~regulation of cell killing	9	1.18734	8.10685e-05	6.00353	5	0.813008	0.0305141	4.15535
GOTERM_BP_FAT	GO:0048771~tissue remodeling	11	1.45119	8.64898e-05	4.68361	8	1.30081	0.00248071	4.24376
GOTERM_BP_FAT	GO:0001912~positive regulation of leukocyte mediated cytotoxicity	8	1.05541	9.07092e-05	6.96062	5	0.813008	0.0122744	5.42002
GOTERM_BP_FAT	GO:0031343~positive regulation of cell killing	8	1.05541	9.07092e-05	6.96062	5	0.813008	0.0122744	5.42002
GOTERM_BP_FAT	GO:0050766~positive regulation of phagocytosis	8	1.05541	9.07092e-05	6.96062	6	0.97561	0.00186548	6.50403
GOTERM_BP_FAT	GO:0007179~transforming growth factor beta receptor signaling pathway	11	1.45119	0.000104432	4.58603	7	1.13821	0.0117941	3.63593
GOTERM_BP_FAT	GO:0001914~regulation of T cell mediated cytotoxicity	6	0.791557	0.000109489	10.9155	4	0.650407	0.00827784	9.06622
GOTERM_BP_FAT	GO:0007049~cell cycle	53	6.99208	0.000111618	1.73588	34	5.52846	0.0495259	1.38738
GOTERM_BP_FAT	GO:0051248~negative regulation of protein metabolic process	14	1.84697	0.00011625	3.59186	10	1.62602	0.0038612	3.19642
GOTERM_BP_FAT	GO:0002474~antigen processing and presentation of peptide antigen via MHC class I	7	0.923483	0.000116355	8.24015	6	0.97561	0.000418553	8.79957
GOTERM_BP_FAT	GO:0009620~response to fungus	7	0.923483	0.000116355	8.24015	6	0.97561	0.000418553	8.79957
GOTERM_BP_FAT	GO:0050729~positive regulation of inflammatory response	8	1.05541	0.000122586	6.67059	8	1.30081	3.02897e-05	8.3107
GOTERM_BP_FAT	GO:0051302~regulation of cell division	10	1.31926	0.000123313	5.00295	5	0.813008	0.0747417	3.11651
GOTERM_BP_FAT	GO:0007507~heart development	26	3.43008	0.000129021	2.33321	22	3.57724	0.000247574	2.45967
GOTERM_BP_FAT	GO:0030888~regulation of B cell proliferation	9	1.18734	0.000133343	5.62831	7	1.13821	0.00149219	5.4539
GOTERM_BP_FAT	GO:0003006~reproductive developmental process	29	3.82586	0.000137308	2.19826	22	3.57724	0.00219061	2.07768
GOTERM_BP_FAT	GO:0021700~developmental maturation	16	2.11082	0.000138361	3.17018	9	1.46341	0.0494186	2.22167
GOTERM_BP_FAT	GO:0030163~protein catabolic process	49	6.46438	0.000147163	1.76363	33	5.36585	0.0254327	1.47978
GOTERM_BP_FAT	GO:0008637~apoptotic mitochondrial changes	8	1.05541	0.000162985	6.40377	8	1.30081	4.06267e-05	7.97828
GOTERM_BP_FAT	GO:0050764~regulation of phagocytosis	8	1.05541	0.000162985	6.40377	6	0.97561	0.00275732	5.98371
GOTERM_BP_FAT	GO:0048878~chemical homeostasis	36	4.74934	0.000163529	1.97376	24	3.90244	0.0215163	1.63937
GOTERM_BP_FAT	GO:0032504~multicellular organism reproduction	39	5.14512	0.000167467	1.90821	25	4.06504	0.0397011	1.52397
GOTERM_BP_FAT	GO:0048609~reproductive process in a multicellular organism	39	5.14512	0.000167467	1.90821	25	4.06504	0.0397011	1.52397
GOTERM_BP_FAT	GO:0002526~acute inflammatory response	14	1.84697	0.000172486	3.45883	9	1.46341	0.0155691	2.77023
GOTERM_BP_FAT	GO:0070201~regulation of establishment of protein localization	13	1.71504	0.000184168	3.66413	11	1.78862	0.000498672	3.86272
GOTERM_BP_FAT	GO:0045084~positive regulation of interleukin-12 biosynthetic process	5	0.659631	0.000190557	14.2941	4	0.650407	0.00197961	14.2469
GOTERM_BP_FAT	GO:0045410~positive regulation of interleukin-6 biosynthetic process	5	0.659631	0.000190557	14.2941	4	0.650407	0.00197961	14.2469
GOTERM_BP_FAT	GO:0046627~negative regulation of insulin receptor signaling pathway	5	0.659631	0.000190557	14.2941	4	0.650407	0.00197961	14.2469
GOTERM_BP_FAT	GO:0045787~positive regulation of cell cycle	9	1.18734	0.000210691	5.29724	6	0.97561	0.0107487	4.39978
GOTERM_BP_FAT	GO:0045807~positive regulation of endocytosis	9	1.18734	0.000210691	5.29724	6	0.97561	0.0107487	4.39978
GOTERM_BP_FAT	GO:0044236~multicellular organismal metabolic process	8	1.05541	0.000213512	6.15747	5	0.813008	0.0188603	4.79464
GOTERM_BP_FAT	GO:0046635~positive regulation of alpha-beta T cell activation	8	1.05541	0.000213512	6.15747	4	0.650407	0.0839843	3.83571
GOTERM_BP_FAT	GO:0050777~negative regulation of immune response	8	1.05541	0.000213512	6.15747	5	0.813008	0.0188603	4.79464
GOTERM_BP_FAT	GO:0030155~regulation of cell adhesion	15	1.97889	0.000222198	3.19337	11	1.78862	0.00430829	2.91759
GOTERM_BP_FAT	GO:0001889~liver development	10	1.31926	0.000222416	4.6539	6	0.97561	0.0277634	3.4789
GOTERM_BP_FAT	GO:0045428~regulation of nitric oxide biosynthetic process	7	0.923483	0.000234123	7.37276	4	0.650407	0.0383667	5.24887
GOTERM_BP_FAT	GO:0046425~regulation of JAK-STAT cascade	7	0.923483	0.000234123	7.37276	5	0.813008	0.00609585	6.56108
GOTERM_BP_FAT	GO:0048608~reproductive structure development	18	2.37467	0.000250401	2.77086	16	2.60163	0.000216792	3.06857
GOTERM_BP_FAT	GO:0040007~growth	23	3.0343	0.000253758	2.38482	17	2.76423	0.00474162	2.19609
GOTERM_BP_FAT	GO:0042089~cytokine biosynthetic process	6	0.791557	0.000280526	9.23621	6	0.97561	9.94631e-05	11.5071
GOTERM_BP_FAT	GO:0032102~negative regulation of response to external stimulus	9	1.18734	0.00032147	5.00295	6	0.97561	0.0136436	4.15535
GOTERM_BP_FAT	GO:0009057~macromolecule catabolic process	54	7.12401	0.000327635	1.65235	39	6.34146	0.0135012	1.48678
GOTERM_BP_FAT	GO:0051223~regulation of protein transport	12	1.58311	0.000335163	3.69448	10	1.62602	0.00107011	3.83571
GOTERM_BP_FAT	GO:0044265~cellular macromolecule catabolic process	51	6.72823	0.000356961	1.67586	37	6.01626	0.012585	1.51476
GOTERM_BP_FAT	GO:0042088~T-helper 1 type immune response	5	0.659631	0.000366063	12.5074	7	1.13821	1.04783e-07	21.8156
GOTERM_BP_FAT	GO:0050732~negative regulation of peptidyl-tyrosine phosphorylation	5	0.659631	0.000366063	12.5074	4	0.650407	0.00307354	12.4661
GOTERM_BP_FAT	GO:0051603~proteolysis involved in cellular protein catabolic process	46	6.0686	0.000400098	1.72386	31	5.04065	0.0391666	1.44737
GOTERM_BP_FAT	GO:0042107~cytokine metabolic process	6	0.791557	0.00041853	8.57648	6	0.97561	0.000149642	10.6852
GOTERM_BP_FAT	GO:0051241~negative regulation of multicellular organismal process	15	1.97889	0.000427681	3.00177	12	1.95122	0.00215842	2.99185
GOTERM_BP_FAT	GO:0002761~regulation of myeloid leukocyte differentiation	8	1.05541	0.000444556	5.52049	6	0.97561	0.00540312	5.15837
GOTERM_BP_FAT	GO:0050873~brown fat cell differentiation	8	1.05541	0.000444556	5.52049	8	1.30081	0.000114754	6.87782
GOTERM_BP_FAT	GO:0031327~negative regulation of cellular biosynthetic process	39	5.14512	0.000454058	1.81502	39	6.34146	4.018e-06	2.26128
GOTERM_BP_FAT	GO:0044257~cellular protein catabolic process	46	6.0686	0.000456927	1.71423	31	5.04065	0.0408661	1.43928
GOTERM_BP_FAT	GO:0040008~regulation of growth	27	3.56201	0.000464716	2.11062	16	2.60163	0.0906413	1.55826
GOTERM_BP_FAT	GO:0032020~ISG15-protein conjugation	4	0.527704	0.000476388	20.0118	3	0.487805	0.00909697	18.6991
GOTERM_BP_FAT	GO:0060397~JAK-STAT cascade involved in growth hormone signaling pathway	4	0.527704	0.000476388	20.0118	3	0.487805	0.00909697	18.6991
GOTERM_BP_FAT	GO:0009890~negative regulation of biosynthetic process	39	5.14512	0.00054356	1.79829	39	6.34146	5.00189e-06	2.24044
GOTERM_BP_FAT	GO:0050708~regulation of protein secretion	8	1.05541	0.000555183	5.33648	8	1.30081	0.000144562	6.64856
GOTERM_BP_FAT	GO:0001825~blastocyst formation	7	0.923483	0.000566308	6.36739	4	0.650407	0.0558576	4.53311
GOTERM_BP_FAT	GO:0030856~regulation of epithelial cell differentiation	7	0.923483	0.000566308	6.36739	4	0.650407	0.0558576	4.53311
GOTERM_BP_FAT	GO:0032103~positive regulation of response to external stimulus	9	1.18734	0.000572629	4.6181	8	1.30081	0.000799417	5.11428
GOTERM_BP_FAT	GO:0042509~regulation of tyrosine phosphorylation of STAT protein	6	0.791557	0.000602156	8.00471	5	0.813008	0.00243754	8.3107
GOTERM_BP_FAT	GO:0043406~positive regulation of MAP kinase activity	11	1.45119	0.000611626	3.73101	6	0.97561	0.0866141	2.53547
GOTERM_BP_FAT	GO:0001916~positive regulation of T cell mediated cytotoxicity	5	0.659631	0.000632935	11.1177	4	0.650407	0.00447401	11.0809
GOTERM_BP_FAT	GO:0042104~positive regulation of activated T cell proliferation	5	0.659631	0.000632935	11.1177	3	0.487805	0.047788	8.3107
GOTERM_BP_FAT	GO:0000187~activation of MAPK activity	10	1.31926	0.000723433	4.00236	6	0.97561	0.0487991	2.99185
GOTERM_BP_FAT	GO:0001933~negative regulation of protein amino acid phosphorylation	7	0.923483	0.000734166	6.09054	5	0.813008	0.0122744	5.42002
GOTERM_BP_FAT	GO:0008630~DNA damage response, signal transduction resulting in induction of apoptosis	7	0.923483	0.000734166	6.09054	5	0.813008	0.0122744	5.42002
GOTERM_BP_FAT	GO:0032963~collagen metabolic process	7	0.923483	0.000734166	6.09054	4	0.650407	0.0623951	4.33602
GOTERM_BP_FAT	GO:0048008~platelet-derived growth factor receptor signaling pathway	7	0.923483	0.000734166	6.09054	6	0.97561	0.00186548	6.50403
GOTERM_BP_FAT	GO:0019932~second-messenger-mediated signaling	16	2.11082	0.000768623	2.71346	10	1.62602	0.047181	2.11289
GOTERM_BP_FAT	GO:0035272~exocrine system development	9	1.18734	0.000814381	4.39283	6	0.97561	0.0230577	3.6486
GOTERM_BP_FAT	GO:0032269~negative regulation of cellular protein metabolic process	12	1.58311	0.000824818	3.3353	7	1.13821	0.0679995	2.42396
GOTERM_BP_FAT	GO:0001836~release of cytochrome c from mitochondria	6	0.791557	0.00084014	7.50442	5	0.813008	0.00314824	7.79128
GOTERM_BP_FAT	GO:0044259~multicellular organismal macromolecule metabolic process	7	0.923483	0.000938027	5.83677	4	0.650407	0.0692696	4.15535
GOTERM_BP_FAT	GO:0030100~regulation of endocytosis	10	1.31926	0.000971986	3.84842	7	1.13821	0.0171232	3.35625
GOTERM_BP_FAT	GO:0001893~maternal placenta development	5	0.659631	0.00101337	10.0059	4	0.650407	0.00620287	9.97284
GOTERM_BP_FAT	GO:0060669~embryonic placenta morphogenesis	5	0.659631	0.00101337	10.0059	3	0.487805	0.0581843	7.47963
GOTERM_BP_FAT	GO:0060443~mammary gland morphogenesis	8	1.05541	0.00102277	4.85134	5	0.813008	0.0415109	3.77759
GOTERM_BP_FAT	GO:0060341~regulation of cellular localization	19	2.5066	0.00112563	2.36164	17	2.76423	0.00073676	2.63258
GOTERM_BP_FAT	GO:0010332~response to gamma radiation	6	0.791557	0.00114172	7.06298	4	0.650407	0.028554	5.86638
GOTERM_BP_FAT	GO:0060713~labyrinthine layer morphogenesis	6	0.791557	0.00114172	7.06298	4	0.650407	0.028554	5.86638
GOTERM_BP_FAT	GO:0060396~growth hormone receptor signaling pathway	4	0.527704	0.0011467	16.0094	3	0.487805	0.0147611	14.9593
GOTERM_BP_FAT	GO:0060416~response to growth hormone stimulus	4	0.527704	0.0011467	16.0094	3	0.487805	0.0147611	14.9593
GOTERM_BP_FAT	GO:0070391~response to lipoteichoic acid	4	0.527704	0.0011467	16.0094	3	0.487805	0.0147611	14.9593
GOTERM_BP_FAT	GO:0002637~regulation of immunoglobulin production	7	0.923483	0.00118278	5.6033	4	0.650407	0.07647	3.98914
GOTERM_BP_FAT	GO:0010741~negative regulation of protein kinase cascade	7	0.923483	0.00118278	5.6033	5	0.813008	0.0164669	4.98642
GOTERM_BP_FAT	GO:0060688~regulation of morphogenesis of a branching structure	7	0.923483	0.00118278	5.6033	4	0.650407	0.07647	3.98914
GOTERM_BP_FAT	GO:0046634~regulation of alpha-beta T cell activation	8	1.05541	0.00123331	4.70865	5	0.813008	0.0456126	3.66649
GOTERM_BP_FAT	GO:0022402~cell cycle process	35	4.61741	0.00128421	1.78222	24	3.90244	0.0444228	1.52257
GOTERM_BP_FAT	GO:0008406~gonad development	13	1.71504	0.00136439	2.95629	11	1.78862	0.00266058	3.11651
GOTERM_BP_FAT	GO:0048589~developmental growth	14	1.84697	0.00137199	2.80165	12	1.95122	0.00215842	2.99185
GOTERM_BP_FAT	GO:0051046~regulation of secretion	16	2.11082	0.00139652	2.56151	15	2.43902	0.000473871	2.99185
GOTERM_BP_FAT	GO:0002673~regulation of acute inflammatory response	6	0.791557	0.00151653	6.67059	4	0.650407	0.0332713	5.54047
GOTERM_BP_FAT	GO:0002709~regulation of T cell mediated immunity	6	0.791557	0.00151653	6.67059	4	0.650407	0.0332713	5.54047
GOTERM_BP_FAT	GO:0002861~regulation of inflammatory response to antigenic stimulus	6	0.791557	0.00151653	6.67059	5	0.813008	0.00496745	6.92559
GOTERM_BP_FAT	GO:0007173~epidermal growth factor receptor signaling pathway	5	0.659631	0.00152988	9.09626	4	0.650407	0.00827784	9.06622
GOTERM_BP_FAT	GO:0006470~protein amino acid dephosphorylation	15	1.97889	0.00159387	2.63313	12	1.95122	0.00595054	2.62443
GOTERM_BP_FAT	GO:0007178~transmembrane receptor protein serine/threonine kinase signaling pathway	12	1.58311	0.00162	3.07874	9	1.46341	0.012584	2.87678
GOTERM_BP_FAT	GO:0042326~negative regulation of phosphorylation	7	0.923483	0.00181573	5.18824	5	0.813008	0.0214581	4.61706
GOTERM_BP_FAT	GO:0010558~negative regulation of macromolecule biosynthetic process	36	4.74934	0.00189787	1.7235	37	6.01626	1.27047e-05	2.20691
GOTERM_BP_FAT	GO:0045137~development of primary sexual characteristics	14	1.84697	0.00196774	2.69389	11	1.78862	0.00873642	2.63705
GOTERM_BP_FAT	GO:0030334~regulation of cell migration	13	1.71504	0.00201131	2.82775	12	1.95122	0.00109108	3.25201
GOTERM_BP_FAT	GO:0019725~cellular homeostasis	31	4.08971	0.00204601	1.80865	20	3.25203	0.0958104	1.45377
GOTERM_BP_FAT	GO:0022602~ovulation cycle process	9	1.18734	0.00205973	3.83204	7	1.13821	0.0106706	3.71329
GOTERM_BP_FAT	GO:0045646~regulation of erythrocyte differentiation	5	0.659631	0.00220482	8.33824	3	0.487805	0.080987	6.23303
GOTERM_BP_FAT	GO:0046006~regulation of activated T cell proliferation	5	0.659631	0.00220482	8.33824	4	0.650407	0.0107129	8.3107
GOTERM_BP_FAT	GO:0042698~ovulation cycle	9	1.18734	0.00236582	3.75221	7	1.13821	0.0117941	3.63593
GOTERM_BP_FAT	GO:0031400~negative regulation of protein modification process	8	1.05541	0.0024337	4.21301	6	0.97561	0.0170216	3.93665
GOTERM_BP_FAT	GO:0043407~negative regulation of MAP kinase activity	6	0.791557	0.0025259	6.00353	5	0.813008	0.0073825	6.23303
GOTERM_BP_FAT	GO:0051270~regulation of cell motion	14	1.84697	0.00254252	2.61836	13	2.11382	0.001166	3.02913
GOTERM_BP_FAT	GO:0010563~negative regulation of phosphorus metabolic process	7	0.923483	0.00267668	4.83043	5	0.813008	0.0272821	4.29864
GOTERM_BP_FAT	GO:0045936~negative regulation of phosphate metabolic process	7	0.923483	0.00267668	4.83043	5	0.813008	0.0272821	4.29864
GOTERM_BP_FAT	GO:0021915~neural tube development	12	1.58311	0.00268512	2.89327	8	1.30081	0.0482916	2.40309
GOTERM_BP_FAT	GO:0002711~positive regulation of T cell mediated immunity	5	0.659631	0.00306006	7.69684	4	0.650407	0.0135184	7.67142
GOTERM_BP_FAT	GO:0002763~positive regulation of myeloid leukocyte differentiation	5	0.659631	0.00306006	7.69684	3	0.487805	0.093254	5.75356
GOTERM_BP_FAT	GO:0002864~regulation of acute inflammatory response to antigenic stimulus	5	0.659631	0.00306006	7.69684	4	0.650407	0.0135184	7.67142
GOTERM_BP_FAT	GO:0002883~regulation of hypersensitivity	5	0.659631	0.00306006	7.69684	4	0.650407	0.0135184	7.67142
GOTERM_BP_FAT	GO:0006968~cellular defense response	5	0.659631	0.00306006	7.69684	3	0.487805	0.093254	5.75356
GOTERM_BP_FAT	GO:0043900~regulation of multi-organism process	5	0.659631	0.00306006	7.69684	4	0.650407	0.0135184	7.67142
GOTERM_BP_FAT	GO:0050854~regulation of antigen receptor-mediated signaling pathway	5	0.659631	0.00306006	7.69684	3	0.487805	0.093254	5.75356
GOTERM_BP_FAT	GO:0009894~regulation of catabolic process	9	1.18734	0.00308414	3.60212	6	0.97561	0.0487991	2.99185
GOTERM_BP_FAT	GO:0045638~negative regulation of myeloid cell differentiation	6	0.791557	0.00318091	5.71765	5	0.813008	0.00883596	5.93622
GOTERM_BP_FAT	GO:0031348~negative regulation of defense response	7	0.923483	0.00320705	4.66942	7	1.13821	0.00104636	5.81749
GOTERM_BP_FAT	GO:0040012~regulation of locomotion	14	1.84697	0.00324805	2.54695	13	2.11382	0.0014849	2.94652
GOTERM_BP_FAT	GO:0030855~epithelial cell differentiation	15	1.97889	0.00326308	2.44046	13	2.11382	0.0038046	2.6351
GOTERM_BP_FAT	GO:0048511~rhythmic process	13	1.71504	0.0034342	2.65462	11	1.78862	0.00579341	2.7985
GOTERM_BP_FAT	GO:0006508~proteolysis	72	9.49868	0.0034897	1.39347	53	8.61789	0.0511828	1.27795
GOTERM_BP_FAT	GO:0001841~neural tube formation	9	1.18734	0.00350161	3.53149	7	1.13821	0.0156603	3.42205
GOTERM_BP_FAT	GO:0051272~positive regulation of cell motion	8	1.05541	0.00380946	3.90474	6	0.97561	0.0230577	3.6486
GOTERM_BP_FAT	GO:0050728~negative regulation of inflammatory response	6	0.791557	0.00394991	5.45776	6	0.97561	0.00150902	6.79967
GOTERM_BP_FAT	GO:0010638~positive regulation of organelle organization	9	1.18734	0.00396154	3.46358	7	1.13821	0.0171232	3.35625
GOTERM_BP_FAT	GO:0046660~female sex differentiation	10	1.31926	0.00427877	3.12684	8	1.30081	0.0137053	3.11651
GOTERM_BP_FAT	GO:0008585~female gonad development	9	1.18734	0.00446671	3.39823	7	1.13821	0.0186774	3.29292
GOTERM_BP_FAT	GO:0046631~alpha-beta T cell activation	6	0.791557	0.00484318	5.22046	6	0.97561	0.00186548	6.50403
GOTERM_BP_FAT	GO:0001838~embryonic epithelial tube formation	9	1.18734	0.00501994	3.3353	7	1.13821	0.0203253	3.23194
GOTERM_BP_FAT	GO:0006959~humoral immune response	9	1.18734	0.00501994	3.3353	6	0.97561	0.0641123	2.77023
GOTERM_BP_FAT	GO:0007548~sex differentiation	15	1.97889	0.00537662	2.30905	12	1.95122	0.0152376	2.30143
GOTERM_BP_FAT	GO:0002886~regulation of myeloid leukocyte mediated immunity	5	0.659631	0.00539467	6.67059	5	0.813008	0.00243754	8.3107
GOTERM_BP_FAT	GO:0040017~positive regulation of locomotion	8	1.05541	0.0057075	3.63851	6	0.97561	0.0303284	3.39983
GOTERM_BP_FAT	GO:0001773~myeloid dendritic cell activation	4	0.527704	0.00573513	10.0059	4	0.650407	0.00307354	12.4661
GOTERM_BP_FAT	GO:0001796~regulation of type IIa hypersensitivity	4	0.527704	0.00573513	10.0059	3	0.487805	0.0381627	9.34954
GOTERM_BP_FAT	GO:0001798~positive regulation of type IIa hypersensitivity	4	0.527704	0.00573513	10.0059	3	0.487805	0.0381627	9.34954
GOTERM_BP_FAT	GO:0002888~positive regulation of myeloid leukocyte mediated immunity	4	0.527704	0.00573513	10.0059	3	0.487805	0.0381627	9.34954
GOTERM_BP_FAT	GO:0002892~regulation of type II hypersensitivity	4	0.527704	0.00573513	10.0059	3	0.487805	0.0381627	9.34954
GOTERM_BP_FAT	GO:0002894~positive regulation of type II hypersensitivity	4	0.527704	0.00573513	10.0059	3	0.487805	0.0381627	9.34954
GOTERM_BP_FAT	GO:0043011~myeloid dendritic cell differentiation	4	0.527704	0.00573513	10.0059	4	0.650407	0.00307354	12.4661
GOTERM_BP_FAT	GO:0060670~branching involved in embryonic placenta morphogenesis	4	0.527704	0.00573513	10.0059	3	0.487805	0.0381627	9.34954
GOTERM_BP_FAT	GO:0010552~positive regulation of specific transcription from RNA polymerase II promoter	6	0.791557	0.00587085	5.00295	5	0.813008	0.0142733	5.19419
GOTERM_BP_FAT	GO:0045765~regulation of angiogenesis	8	1.05541	0.00647497	3.55765	6	0.97561	0.0330377	3.32428
GOTERM_BP_FAT	GO:0009991~response to extracellular stimulus	15	1.97889	0.00656798	2.25697	10	1.62602	0.0860653	1.87459
GOTERM_BP_FAT	GO:0043487~regulation of RNA stability	5	0.659631	0.00691285	6.25368	5	0.813008	0.00314824	7.79128
GOTERM_BP_FAT	GO:0046545~development of primary female sexual characteristics	9	1.18734	0.00699685	3.15976	7	1.13821	0.0258532	3.06184
GOTERM_BP_FAT	GO:0032945~negative regulation of mononuclear cell proliferation	7	0.923483	0.00709827	4.00236	7	1.13821	0.00241474	4.98642
GOTERM_BP_FAT	GO:0050672~negative regulation of lymphocyte proliferation	7	0.923483	0.00709827	4.00236	7	1.13821	0.00241474	4.98642
GOTERM_BP_FAT	GO:0050731~positive regulation of peptidyl-tyrosine phosphorylation	7	0.923483	0.00709827	4.00236	5	0.813008	0.0499319	3.56173
GOTERM_BP_FAT	GO:0070664~negative regulation of leukocyte proliferation	7	0.923483	0.00709827	4.00236	7	1.13821	0.00241474	4.98642
GOTERM_BP_FAT	GO:0060537~muscle tissue development	15	1.97889	0.00796143	2.20718	11	1.78862	0.0464949	2.01657
GOTERM_BP_FAT	GO:0060627~regulation of vesicle-mediated transport	11	1.45119	0.00812363	2.65216	9	1.46341	0.0178244	2.70348
GOTERM_BP_FAT	GO:0001959~regulation of cytokine-mediated signaling pathway	4	0.527704	0.00828622	8.89413	3	0.487805	0.047788	8.3107
GOTERM_BP_FAT	GO:0051023~regulation of immunoglobulin secretion	4	0.527704	0.00828622	8.89413	4	0.650407	0.00447401	11.0809
GOTERM_BP_FAT	GO:0060603~mammary gland duct morphogenesis	6	0.791557	0.00836889	4.6181	4	0.650407	0.0839843	3.83571
GOTERM_BP_FAT	GO:0060740~prostate gland epithelium morphogenesis	6	0.791557	0.00836889	4.6181	4	0.650407	0.0839843	3.83571
GOTERM_BP_FAT	GO:0035148~tube lumen formation	9	1.18734	0.0086085	3.05264	8	1.30081	0.00892226	3.38063
GOTERM_BP_FAT	GO:0050869~negative regulation of B cell activation	5	0.659631	0.00868858	5.88582	5	0.813008	0.00398815	7.33297
GOTERM_BP_FAT	GO:0060324~face development	5	0.659631	0.00868858	5.88582	4	0.650407	0.028554	5.86638
GOTERM_BP_FAT	GO:0030218~erythrocyte differentiation	8	1.05541	0.00923893	3.3353	6	0.97561	0.0420468	3.11651
GOTERM_BP_FAT	GO:0030335~positive regulation of cell migration	7	0.923483	0.00934637	3.78601	6	0.97561	0.0152703	4.04304
GOTERM_BP_FAT	GO:0006974~response to DNA damage stimulus	25	3.29815	0.00943588	1.74319	20	3.25203	0.0221798	1.73743
GOTERM_BP_FAT	GO:0048545~response to steroid hormone stimulus	9	1.18734	0.00951132	3.00177	13	2.11382	3.62617e-06	5.40196
GOTERM_BP_FAT	GO:0007435~salivary gland morphogenesis	6	0.791557	0.00985825	4.44706	4	0.650407	0.0918	3.69365
GOTERM_BP_FAT	GO:0051048~negative regulation of secretion	6	0.791557	0.00985825	4.44706	5	0.813008	0.0214581	4.61706
GOTERM_BP_FAT	GO:0060512~prostate gland morphogenesis	6	0.791557	0.00985825	4.44706	4	0.650407	0.0918	3.69365
GOTERM_BP_FAT	GO:0051172~negative regulation of nitrogen compound metabolic process	32	4.22164	0.0104972	1.59695	34	5.52846	7.25172e-05	2.11394
GOTERM_BP_FAT	GO:0001659~temperature homeostasis	5	0.659631	0.0107377	5.55883	5	0.813008	0.00496745	6.92559
GOTERM_BP_FAT	GO:0060674~placenta blood vessel development	5	0.659631	0.0107377	5.55883	4	0.650407	0.0332713	5.54047
GOTERM_BP_FAT	GO:0016311~dephosphorylation	15	1.97889	0.0107947	2.12891	12	1.95122	0.0261612	2.12188
GOTERM_BP_FAT	GO:0006979~response to oxidative stress	11	1.45119	0.0111959	2.53023	9	1.46341	0.0230216	2.57918
GOTERM_BP_FAT	GO:0002866~positive regulation of acute inflammatory response to antigenic stimulus	4	0.527704	0.0114032	8.00471	3	0.487805	0.0581843	7.47963
GOTERM_BP_FAT	GO:0002885~positive regulation of hypersensitivity	4	0.527704	0.0114032	8.00471	3	0.487805	0.0581843	7.47963
GOTERM_BP_FAT	GO:0010466~negative regulation of peptidase activity	4	0.527704	0.0114032	8.00471	4	0.650407	0.00620287	9.97284
GOTERM_BP_FAT	GO:0032088~negative regulation of NF-kappaB transcription factor activity	4	0.527704	0.0114032	8.00471	3	0.487805	0.0581843	7.47963
GOTERM_BP_FAT	GO:0043154~negative regulation of caspase activity	4	0.527704	0.0114032	8.00471	4	0.650407	0.00620287	9.97284
GOTERM_BP_FAT	GO:0045892~negative regulation of transcription, DNA-dependent	26	3.43008	0.011658	1.68931	24	3.90244	0.00308542	1.94276
GOTERM_BP_FAT	GO:0016481~negative regulation of transcription	30	3.95778	0.011784	1.61385	32	5.20325	9.44691e-05	2.1447
GOTERM_BP_FAT	GO:0001843~neural tube closure	7	0.923483	0.012061	3.59186	6	0.97561	0.0189011	3.83571
GOTERM_BP_FAT	GO:0030850~prostate gland development	7	0.923483	0.012061	3.59186	5	0.813008	0.0693587	3.19642
GOTERM_BP_FAT	GO:0060606~tube closure	7	0.923483	0.012061	3.59186	6	0.97561	0.0189011	3.83571
GOTERM_BP_FAT	GO:0042493~response to drug	11	1.45119	0.0120858	2.50147	8	1.30081	0.0625012	2.26656
GOTERM_BP_FAT	GO:0051253~negative regulation of RNA metabolic process	26	3.43008	0.0125757	1.67841	24	3.90244	0.00336367	1.93023
GOTERM_BP_FAT	GO:0010551~regulation of specific transcription from RNA polymerase II promoter	8	1.05541	0.0127804	3.1391	7	1.13821	0.0156603	3.42205
GOTERM_BP_FAT	GO:0034101~erythrocyte homeostasis	8	1.05541	0.0127804	3.1391	6	0.97561	0.0524011	2.93319
GOTERM_BP_FAT	GO:0051146~striated muscle cell differentiation	11	1.45119	0.013028	2.47337	8	1.30081	0.0656185	2.24109
GOTERM_BP_FAT	GO:0002285~lymphocyte activation during immune response	5	0.659631	0.0130746	5.26626	4	0.650407	0.0383667	5.24887
GOTERM_BP_FAT	GO:0046632~alpha-beta T cell differentiation	5	0.659631	0.0130746	5.26626	5	0.813008	0.00609585	6.56108
GOTERM_BP_FAT	GO:0033500~carbohydrate homeostasis	7	0.923483	0.0136074	3.50206	5	0.813008	0.0747417	3.11651
GOTERM_BP_FAT	GO:0042593~glucose homeostasis	7	0.923483	0.0136074	3.50206	5	0.813008	0.0747417	3.11651
GOTERM_BP_FAT	GO:0070423~nucleotide-binding oligomerization domain containing signaling pathway	3	0.395778	0.0139461	15.0088	3	0.487805	0.00909697	18.6991
GOTERM_BP_FAT	GO:0070431~nucleotide-binding oligomerization domain containing 2 signaling pathway	3	0.395778	0.0139461	15.0088	3	0.487805	0.00909697	18.6991
GOTERM_BP_FAT	GO:0002675~positive regulation of acute inflammatory response	4	0.527704	0.0151056	7.27701	3	0.487805	0.0692746	6.79967
GOTERM_BP_FAT	GO:0048384~retinoic acid receptor signaling pathway	4	0.527704	0.0151056	7.27701	3	0.487805	0.0692746	6.79967
GOTERM_BP_FAT	GO:0050856~regulation of T cell receptor signaling pathway	4	0.527704	0.0151056	7.27701	3	0.487805	0.0692746	6.79967
GOTERM_BP_FAT	GO:0016331~morphogenesis of embryonic epithelium	10	1.31926	0.0153319	2.56561	7	1.13821	0.0919987	2.2375
GOTERM_BP_FAT	GO:0006953~acute-phase response	6	0.791557	0.0153932	4.00236	5	0.813008	0.0305141	4.15535
GOTERM_BP_FAT	GO:0045934~negative regulation of nucleobase, nucleoside, nucleotide and nucleic acid metabolic process	31	4.08971	0.0155355	1.56263	33	5.36585	0.000136198	2.07244
GOTERM_BP_FAT	GO:0010827~regulation of glucose transport	5	0.659631	0.0157118	5.00295	4	0.650407	0.0438345	4.98642
GOTERM_BP_FAT	GO:0048145~regulation of fibroblast proliferation	5	0.659631	0.0157118	5.00295	4	0.650407	0.0438345	4.98642
GOTERM_BP_FAT	GO:0048660~regulation of smooth muscle cell proliferation	5	0.659631	0.0157118	5.00295	6	0.97561	0.00094926	7.47963
GOTERM_BP_FAT	GO:0010608~posttranscriptional regulation of gene expression	15	1.97889	0.0160186	2.02822	13	2.11382	0.0157934	2.18998
GOTERM_BP_FAT	GO:0014020~primary neural tube formation	7	0.923483	0.0171051	3.3353	6	0.97561	0.0253406	3.56173
GOTERM_BP_FAT	GO:0050868~negative regulation of T cell activation	7	0.923483	0.0171051	3.3353	5	0.813008	0.0861174	2.96811
GOTERM_BP_FAT	GO:0001824~blastocyst development	8	1.05541	0.0172058	2.96471	10	1.62602	0.000262879	4.61706
GOTERM_BP_FAT	GO:0060322~head development	5	0.659631	0.0186602	4.76471	4	0.650407	0.0496676	4.74897
GOTERM_BP_FAT	GO:0010829~negative regulation of glucose transport	4	0.527704	0.0194059	6.67059	4	0.650407	0.0107129	8.3107
GOTERM_BP_FAT	GO:0042176~regulation of protein catabolic process	6	0.791557	0.0200505	3.75221	5	0.813008	0.0376275	3.89564
GOTERM_BP_FAT	GO:0019218~regulation of steroid metabolic process	5	0.659631	0.0219292	4.54813	5	0.813008	0.0104642	5.66639
GOTERM_BP_FAT	GO:0051346~negative regulation of hydrolase activity	5	0.659631	0.0219292	4.54813	5	0.813008	0.0104642	5.66639
GOTERM_BP_FAT	GO:0002294~CD4-positive, alpha-beta T cell differentiation during immune response	3	0.395778	0.022479	12.0071	4	0.650407	0.000600781	19.9457
GOTERM_BP_FAT	GO:0032495~response to muramyl dipeptide	3	0.395778	0.022479	12.0071	3	0.487805	0.0147611	14.9593
GOTERM_BP_FAT	GO:0042093~T-helper cell differentiation	3	0.395778	0.022479	12.0071	4	0.650407	0.000600781	19.9457
GOTERM_BP_FAT	GO:0000122~negative regulation of transcription from RNA polymerase II promoter	20	2.63852	0.0224833	1.73262	18	2.92683	0.0116587	1.94276
GOTERM_BP_FAT	GO:0010629~negative regulation of gene expression	31	4.08971	0.0234291	1.51309	33	5.36585	0.000243041	2.00673
GOTERM_BP_FAT	GO:0002863~positive regulation of inflammatory response to antigenic stimulus	4	0.527704	0.0243097	6.15747	3	0.487805	0.093254	5.75356
GOTERM_BP_FAT	GO:0019915~lipid storage	4	0.527704	0.0243097	6.15747	3	0.487805	0.093254	5.75356
GOTERM_BP_FAT	GO:0043488~regulation of mRNA stability	4	0.527704	0.0243097	6.15747	4	0.650407	0.0135184	7.67142
GOTERM_BP_FAT	GO:0006350~transcription	107	14.1161	0.0249303	1.20839	96	15.6098	0.00155646	1.35072
GOTERM_BP_FAT	GO:0031960~response to corticosteroid stimulus	5	0.659631	0.0255262	4.35039	4	0.650407	0.0623951	4.33602
GOTERM_BP_FAT	GO:0050830~defense response to Gram-positive bacterium	5	0.659631	0.0255262	4.35039	6	0.97561	0.00186548	6.50403
GOTERM_BP_FAT	GO:0006897~endocytosis	17	2.24274	0.0260583	1.80958	14	2.27642	0.0391876	1.85665
GOTERM_BP_FAT	GO:0010324~membrane invagination	17	2.24274	0.0260583	1.80958	14	2.27642	0.0391876	1.85665
GOTERM_BP_FAT	GO:0035270~endocrine system development	9	1.18734	0.0265171	2.50147	7	1.13821	0.0679995	2.42396
GOTERM_BP_FAT	GO:0015833~peptide transport	7	0.923483	0.0284338	2.98048	7	1.13821	0.0106706	3.71329
GOTERM_BP_FAT	GO:0009411~response to UV	6	0.791557	0.0286188	3.43059	5	0.813008	0.0499319	3.56173
GOTERM_BP_FAT	GO:0001818~negative regulation of cytokine production	5	0.659631	0.0294573	4.16912	4	0.650407	0.0692696	4.15535
GOTERM_BP_FAT	GO:0008277~regulation of G-protein coupled receptor protein signaling pathway	5	0.659631	0.0294573	4.16912	4	0.650407	0.0692696	4.15535
GOTERM_BP_FAT	GO:0002286~T cell activation during immune response	4	0.527704	0.0298169	5.71765	4	0.650407	0.016702	7.12346
GOTERM_BP_FAT	GO:0042036~negative regulation of cytokine biosynthetic process	4	0.527704	0.0298169	5.71765	4	0.650407	0.016702	7.12346
GOTERM_BP_FAT	GO:0042771~DNA damage response, signal transduction by p53 class mediator resulting in induction of apoptosis	4	0.527704	0.0298169	5.71765	4	0.650407	0.016702	7.12346
GOTERM_BP_FAT	GO:0007517~muscle organ development	16	2.11082	0.0301859	1.81925	13	2.11382	0.0505919	1.84158
GOTERM_BP_FAT	GO:0042692~muscle cell differentiation	12	1.58311	0.0318024	2.05249	10	1.62602	0.0451041	2.13095
GOTERM_BP_FAT	GO:0051222~positive regulation of protein transport	6	0.791557	0.0319174	3.3353	5	0.813008	0.0544679	3.46279
GOTERM_BP_FAT	GO:0002292~T cell differentiation during immune response	3	0.395778	0.0326143	10.0059	4	0.650407	0.00116582	16.6214
GOTERM_BP_FAT	GO:0002293~alpha-beta T cell differentiation during immune response	3	0.395778	0.0326143	10.0059	4	0.650407	0.00116582	16.6214
GOTERM_BP_FAT	GO:0043193~positive regulation of gene-specific transcription	6	0.791557	0.0354442	3.24515	6	0.97561	0.0152703	4.04304
GOTERM_BP_FAT	GO:0048661~positive regulation of smooth muscle cell proliferation	4	0.527704	0.0359224	5.33648	5	0.813008	0.00243754	8.3107
GOTERM_BP_FAT	GO:0003018~vascular process in circulatory system	7	0.923483	0.0371639	2.80165	8	1.30081	0.00355405	3.98914
GOTERM_BP_FAT	GO:0032147~activation of protein kinase activity	7	0.923483	0.040415	2.74672	6	0.97561	0.0524011	2.93319
GOTERM_BP_FAT	GO:0002495~antigen processing and presentation of peptide antigen via MHC class II	4	0.527704	0.0426169	5.00295	7	1.13821	2.27563e-05	10.9078
GOTERM_BP_FAT	GO:0019886~antigen processing and presentation of exogenous peptide antigen via MHC class II	4	0.527704	0.0426169	5.00295	7	1.13821	2.27563e-05	10.9078
GOTERM_BP_FAT	GO:0042311~vasodilation	5	0.659631	0.0432901	3.70589	6	0.97561	0.00392259	5.54047
GOTERM_BP_FAT	GO:0002287~alpha-beta T cell activation during immune response	3	0.395778	0.0441714	8.57648	4	0.650407	0.00197961	14.2469
GOTERM_BP_FAT	GO:0030225~macrophage differentiation	3	0.395778	0.0441714	8.57648	3	0.487805	0.0293904	10.6852
GOTERM_BP_FAT	GO:0031649~heat generation	3	0.395778	0.0441714	8.57648	3	0.487805	0.0293904	10.6852
GOTERM_BP_FAT	GO:0032583~regulation of gene-specific transcription	8	1.05541	0.0488017	2.38947	8	1.30081	0.0173299	2.97697
GOTERM_BP_FAT	GO:0003013~circulatory system process	11	1.45119	0.0504083	1.98315	11	1.78862	0.0134859	2.47075
GOTERM_BP_FAT	GO:0008015~blood circulation	11	1.45119	0.0504083	1.98315	11	1.78862	0.0134859	2.47075
GOTERM_BP_FAT	GO:0007005~mitochondrion organization	10	1.31926	0.0527588	2.06307	10	1.62602	0.0155769	2.57032
GOTERM_BP_FAT	GO:0016044~membrane organization	21	2.77045	0.0544795	1.54503	17	2.76423	0.0804753	1.55826
GOTERM_BP_FAT	GO:0042534~regulation of tumor necrosis factor biosynthetic process	3	0.395778	0.0569835	7.50442	3	0.487805	0.0381627	9.34954
GOTERM_BP_FAT	GO:0060712~spongiotrophoblast layer development	3	0.395778	0.0569835	7.50442	3	0.487805	0.0381627	9.34954
GOTERM_BP_FAT	GO:0000060~protein import into nucleus, translocation	4	0.527704	0.0577172	4.44706	4	0.650407	0.0332713	5.54047
GOTERM_BP_FAT	GO:0045926~negative regulation of growth	8	1.05541	0.0631343	2.25485	7	1.13821	0.0643987	2.4581
GOTERM_BP_FAT	GO:0051336~regulation of hydrolase activity	16	2.11082	0.0659721	1.63361	13	2.11382	0.0952484	1.65366
GOTERM_BP_FAT	GO:0002504~antigen processing and presentation of peptide or polysaccharide antigen via MHC class II	4	0.527704	0.0660877	4.21301	7	1.13821	6.95671e-05	9.18551
GOTERM_BP_FAT	GO:0030330~DNA damage response, signal transduction by p53 class mediator	4	0.527704	0.0660877	4.21301	4	0.650407	0.0383667	5.24887
GOTERM_BP_FAT	GO:0051259~protein oligomerization	8	1.05541	0.0670777	2.22353	8	1.30081	0.0247898	2.77023
GOTERM_BP_FAT	GO:0042177~negative regulation of protein catabolic process	3	0.395778	0.070897	6.67059	3	0.487805	0.047788	8.3107
GOTERM_BP_FAT	GO:0042531~positive regulation of tyrosine phosphorylation of STAT protein	3	0.395778	0.070897	6.67059	3	0.487805	0.047788	8.3107
GOTERM_BP_FAT	GO:0045599~negative regulation of fat cell differentiation	3	0.395778	0.070897	6.67059	5	0.813008	0.000272611	13.8512
GOTERM_BP_FAT	GO:0032663~regulation of interleukin-2 production	4	0.527704	0.0749775	4.00236	4	0.650407	0.0438345	4.98642
GOTERM_BP_FAT	GO:0043627~response to estrogen stimulus	5	0.659631	0.0800956	3.03209	8	1.30081	0.000273334	6.04415
GOTERM_BP_FAT	GO:0030889~negative regulation of B cell proliferation	3	0.395778	0.0857704	6.00353	4	0.650407	0.00620287	9.97284
GOTERM_BP_FAT	GO:0032653~regulation of interleukin-10 production	3	0.395778	0.0857704	6.00353	3	0.487805	0.0581843	7.47963
GOTERM_BP_FAT	GO:0043367~CD4-positive, alpha beta T cell differentiation	3	0.395778	0.0857704	6.00353	4	0.650407	0.00620287	9.97284
GOTERM_BP_FAT	GO:0035150~regulation of tube size	6	0.791557	0.089703	2.50147	7	1.13821	0.0117941	3.63593
GOTERM_BP_FAT	GO:0050880~regulation of blood vessel size	6	0.791557	0.089703	2.50147	7	1.13821	0.0117941	3.63593
GOTERM_BP_FAT	GO:0001974~blood vessel remodeling	4	0.527704	0.0942218	3.63851	4	0.650407	0.0558576	4.53311
GOTERM_BP_FAT	GO:0002755~MyD88-dependent toll-like receptor signaling pathway	2	0.263852	0.0973077	20.0118	2	0.325203	0.0784707	24.9321
GOTERM_BP_FAT	GO:0045074~regulation of interleukin-10 biosynthetic process	2	0.263852	0.0973077	20.0118	2	0.325203	0.0784707	24.9321
GOTERM_BP_FAT	GO:0045082~positive regulation of interleukin-10 biosynthetic process	2	0.263852	0.0973077	20.0118	2	0.325203	0.0784707	24.9321
GOTERM_BP_FAT	GO:0070427~nucleotide-binding oligomerization domain containing 1 signaling pathway	2	0.263852	0.0973077	20.0118	2	0.325203	0.0784707	24.9321
