# Supplementary material for: Linking Transcriptional Changes over Time in Stimulated Dendritic Cells to Identify Gene Networks Activated during the Innate Immune Response
Source: PLoS Comput Biol. 2013 Nov 7;9(11):e1003323. doi: 10.1371/journal.pcbi.1003323 (PMC3820512; doi:10.1371/journal.pcbi.1003323)
Supplement: Table S8 — Directed paths of 3 edges or more in the optimal sub-network matching directed paths of the same length in KEGG pathways. (XLSX) [file pcbi.1003323.s016.xlsx]

## Sheet: Paths matching KEGG
Supporting Table S8. Directed paths of 3 or more edges in the optimal subnetwork matching KEGG pathways
KEGG Pathway	Description	Path length	Path
mmu04630	Jak-STAT signaling pathway	7	Jak3;Stat6;Socs3;Cntfr;Jak2;Stat5a;Socs4;Il2rb
mmu04630	Jak-STAT signaling pathway	7	Jak3;Stat6;Socs3;Cntfr;Jak2;Stat5a;Socs4;Tyk2
mmu04630	Jak-STAT signaling pathway	6	Stat1;Socs3;Cntfr;Jak2;Stat5a;Socs4;Il2rb
mmu04630	Jak-STAT signaling pathway	6	Stat1;Socs3;Cntfr;Jak2;Stat5a;Socs4;Tyk2
mmu04630	Jak-STAT signaling pathway	6	Pias1;Stat5a;Socs2;Jak2;Stat4;Socs3;Cntfr
mmu04630	Jak-STAT signaling pathway	6	Pias1;Stat5a;Socs2;Jak2;Stat4;Socs3;CR974586.2
mmu04630	Jak-STAT signaling pathway	6	Pias1;Stat5a;Socs2;Jak2;Stat4;Socs3;Crlf2
mmu04630	Jak-STAT signaling pathway	6	Pias1;Stat5a;Socs2;Jak2;Stat4;Socs3;Csf2rb
mmu04630	Jak-STAT signaling pathway	6	Pias1;Stat5a;Socs2;Jak2;Stat4;Socs3;Csf2rb2
mmu04630	Jak-STAT signaling pathway	6	Pias1;Stat5a;Socs2;Jak2;Stat4;Socs3;CT868723.4
mmu04630	Jak-STAT signaling pathway	6	Pias1;Stat5a;Socs2;Jak2;Stat4;Socs3;Gm13305
mmu04630	Jak-STAT signaling pathway	6	Pias1;Stat5a;Socs2;Jak2;Stat4;Socs3;Gm2002
mmu04630	Jak-STAT signaling pathway	6	Pias1;Stat5a;Socs2;Jak2;Stat4;Socs3;Ifnar1
mmu04630	Jak-STAT signaling pathway	6	Pias1;Stat5a;Socs2;Jak2;Stat4;Socs3;Ifnar2
mmu04630	Jak-STAT signaling pathway	6	Pias1;Stat5a;Socs2;Jak2;Stat4;Socs3;Ifngr1
mmu04630	Jak-STAT signaling pathway	6	Pias1;Stat5a;Socs2;Jak2;Stat4;Socs3;Ifngr2
mmu04630	Jak-STAT signaling pathway	6	Pias1;Stat5a;Socs2;Jak2;Stat4;Socs3;Il10rb
mmu04630	Jak-STAT signaling pathway	6	Pias1;Stat5a;Socs2;Jak2;Stat4;Socs3;Il11ra1
mmu04630	Jak-STAT signaling pathway	6	Pias1;Stat5a;Socs2;Jak2;Stat4;Socs3;Il12rb1
mmu04630	Jak-STAT signaling pathway	6	Pias1;Stat5a;Socs2;Jak2;Stat4;Socs3;Il13ra1
mmu04630	Jak-STAT signaling pathway	6	Pias1;Stat5a;Socs2;Jak2;Stat4;Socs3;Il13ra2
mmu04630	Jak-STAT signaling pathway	6	Pias1;Stat5a;Socs2;Jak2;Stat4;Socs3;Il15ra
mmu04630	Jak-STAT signaling pathway	6	Pias1;Stat5a;Socs2;Jak2;Stat4;Socs3;Il20ra
mmu04630	Jak-STAT signaling pathway	6	Pias1;Stat5a;Socs2;Jak2;Stat4;Socs3;Il21r
mmu04630	Jak-STAT signaling pathway	6	Pias1;Stat5a;Socs2;Jak2;Stat4;Socs3;Il22ra1
mmu04630	Jak-STAT signaling pathway	6	Pias1;Stat5a;Socs2;Jak2;Stat4;Socs3;Il22ra2
mmu04630	Jak-STAT signaling pathway	6	Pias1;Stat5a;Socs2;Jak2;Stat4;Socs3;Il28ra
mmu04630	Jak-STAT signaling pathway	6	Pias1;Stat5a;Socs2;Jak2;Stat4;Socs3;Il2ra
mmu04630	Jak-STAT signaling pathway	6	Pias1;Stat5a;Socs2;Jak2;Stat4;Socs3;Il2rg
mmu04630	Jak-STAT signaling pathway	6	Pias1;Stat5a;Socs2;Jak2;Stat4;Socs3;Il3ra
mmu04630	Jak-STAT signaling pathway	6	Pias1;Stat5a;Socs2;Jak2;Stat4;Socs3;Il4ra
mmu04630	Jak-STAT signaling pathway	6	Pias1;Stat5a;Socs2;Jak2;Stat4;Socs3;Il6ra
mmu04630	Jak-STAT signaling pathway	6	Pias1;Stat5a;Socs2;Jak2;Stat4;Socs3;Il7r
mmu04630	Jak-STAT signaling pathway	6	Pias1;Stat5a;Socs2;Jak2;Stat4;Socs3;Il9r
mmu04630	Jak-STAT signaling pathway	6	Pias1;Stat5a;Socs2;Jak2;Stat4;Socs3;Lifr
mmu04630	Jak-STAT signaling pathway	6	Pias4;Stat5a;Socs2;Jak2;Stat4;Socs3;Cntfr
mmu04630	Jak-STAT signaling pathway	6	Pias4;Stat5a;Socs2;Jak2;Stat4;Socs3;CR974586.2
mmu04630	Jak-STAT signaling pathway	6	Pias4;Stat5a;Socs2;Jak2;Stat4;Socs3;Crlf2
mmu04630	Jak-STAT signaling pathway	6	Pias4;Stat5a;Socs2;Jak2;Stat4;Socs3;Csf2rb
mmu04630	Jak-STAT signaling pathway	6	Pias4;Stat5a;Socs2;Jak2;Stat4;Socs3;Csf2rb2
mmu04630	Jak-STAT signaling pathway	6	Pias4;Stat5a;Socs2;Jak2;Stat4;Socs3;CT868723.4
mmu04630	Jak-STAT signaling pathway	6	Pias4;Stat5a;Socs2;Jak2;Stat4;Socs3;Gm13305
mmu04630	Jak-STAT signaling pathway	6	Pias4;Stat5a;Socs2;Jak2;Stat4;Socs3;Gm2002
mmu04630	Jak-STAT signaling pathway	6	Pias4;Stat5a;Socs2;Jak2;Stat4;Socs3;Ifnar1
mmu04630	Jak-STAT signaling pathway	6	Pias4;Stat5a;Socs2;Jak2;Stat4;Socs3;Ifnar2
mmu04630	Jak-STAT signaling pathway	6	Pias4;Stat5a;Socs2;Jak2;Stat4;Socs3;Ifngr1
mmu04630	Jak-STAT signaling pathway	6	Pias4;Stat5a;Socs2;Jak2;Stat4;Socs3;Ifngr2
mmu04630	Jak-STAT signaling pathway	6	Pias4;Stat5a;Socs2;Jak2;Stat4;Socs3;Il10rb
mmu04630	Jak-STAT signaling pathway	6	Pias4;Stat5a;Socs2;Jak2;Stat4;Socs3;Il11ra1
mmu04630	Jak-STAT signaling pathway	6	Pias4;Stat5a;Socs2;Jak2;Stat4;Socs3;Il12rb1
mmu04630	Jak-STAT signaling pathway	6	Pias4;Stat5a;Socs2;Jak2;Stat4;Socs3;Il13ra1
mmu04630	Jak-STAT signaling pathway	6	Pias4;Stat5a;Socs2;Jak2;Stat4;Socs3;Il13ra2
mmu04630	Jak-STAT signaling pathway	6	Pias4;Stat5a;Socs2;Jak2;Stat4;Socs3;Il15ra
mmu04630	Jak-STAT signaling pathway	6	Pias4;Stat5a;Socs2;Jak2;Stat4;Socs3;Il20ra
mmu04630	Jak-STAT signaling pathway	6	Pias4;Stat5a;Socs2;Jak2;Stat4;Socs3;Il21r
mmu04630	Jak-STAT signaling pathway	6	Pias4;Stat5a;Socs2;Jak2;Stat4;Socs3;Il22ra1
mmu04630	Jak-STAT signaling pathway	6	Pias4;Stat5a;Socs2;Jak2;Stat4;Socs3;Il22ra2
mmu04630	Jak-STAT signaling pathway	6	Pias4;Stat5a;Socs2;Jak2;Stat4;Socs3;Il28ra
mmu04630	Jak-STAT signaling pathway	6	Pias4;Stat5a;Socs2;Jak2;Stat4;Socs3;Il2ra
mmu04630	Jak-STAT signaling pathway	6	Pias4;Stat5a;Socs2;Jak2;Stat4;Socs3;Il2rg
mmu04630	Jak-STAT signaling pathway	6	Pias4;Stat5a;Socs2;Jak2;Stat4;Socs3;Il3ra
mmu04630	Jak-STAT signaling pathway	6	Pias4;Stat5a;Socs2;Jak2;Stat4;Socs3;Il4ra
mmu04630	Jak-STAT signaling pathway	6	Pias4;Stat5a;Socs2;Jak2;Stat4;Socs3;Il6ra
mmu04630	Jak-STAT signaling pathway	6	Pias4;Stat5a;Socs2;Jak2;Stat4;Socs3;Il7r
mmu04630	Jak-STAT signaling pathway	6	Pias4;Stat5a;Socs2;Jak2;Stat4;Socs3;Il9r
mmu04630	Jak-STAT signaling pathway	6	Pias4;Stat5a;Socs2;Jak2;Stat4;Socs3;Lifr
mmu04630	Jak-STAT signaling pathway	6	Jak3;Stat6;Socs3;Cntfr;Jak2;Stat5a;Ccnd1
mmu04630	Jak-STAT signaling pathway	6	Jak3;Stat6;Socs3;Cntfr;Jak2;Stat5a;Ccnd3
mmu04630	Jak-STAT signaling pathway	6	Jak3;Stat6;Socs3;Cntfr;Jak2;Stat5a;Myc
mmu04630	Jak-STAT signaling pathway	6	Jak3;Stat6;Socs3;Cntfr;Jak2;Stat5a;Pim1
mmu04630	Jak-STAT signaling pathway	6	Jak3;Stat6;Socs3;Cntfr;Jak2;Stat5a;Socs1
mmu04630	Jak-STAT signaling pathway	6	Jak3;Stat6;Socs3;Cntfr;Jak2;Stat5a;Socs2
mmu04630	Jak-STAT signaling pathway	6	Jak3;Stat6;Socs3;Cntfr;Jak2;Stat5a;Socs5
mmu04630	Jak-STAT signaling pathway	6	Jak3;Stat6;Socs3;Cntfr;Jak2;Stat5a;Socs7
mmu04630	Jak-STAT signaling pathway	6	Cish;Stat5a;Socs2;Jak2;Stat4;Socs3;Cntfr
mmu04630	Jak-STAT signaling pathway	6	Cish;Stat5a;Socs2;Jak2;Stat4;Socs3;CR974586.2
mmu04630	Jak-STAT signaling pathway	6	Cish;Stat5a;Socs2;Jak2;Stat4;Socs3;Crlf2
mmu04630	Jak-STAT signaling pathway	6	Cish;Stat5a;Socs2;Jak2;Stat4;Socs3;Csf2rb
mmu04630	Jak-STAT signaling pathway	6	Cish;Stat5a;Socs2;Jak2;Stat4;Socs3;Csf2rb2
mmu04630	Jak-STAT signaling pathway	6	Cish;Stat5a;Socs2;Jak2;Stat4;Socs3;CT868723.4
mmu04630	Jak-STAT signaling pathway	6	Cish;Stat5a;Socs2;Jak2;Stat4;Socs3;Gm13305
mmu04630	Jak-STAT signaling pathway	6	Cish;Stat5a;Socs2;Jak2;Stat4;Socs3;Gm2002
mmu04630	Jak-STAT signaling pathway	6	Cish;Stat5a;Socs2;Jak2;Stat4;Socs3;Ifnar1
mmu04630	Jak-STAT signaling pathway	6	Cish;Stat5a;Socs2;Jak2;Stat4;Socs3;Ifnar2
mmu04630	Jak-STAT signaling pathway	6	Cish;Stat5a;Socs2;Jak2;Stat4;Socs3;Ifngr1
mmu04630	Jak-STAT signaling pathway	6	Cish;Stat5a;Socs2;Jak2;Stat4;Socs3;Ifngr2
mmu04630	Jak-STAT signaling pathway	6	Cish;Stat5a;Socs2;Jak2;Stat4;Socs3;Il10rb
mmu04630	Jak-STAT signaling pathway	6	Cish;Stat5a;Socs2;Jak2;Stat4;Socs3;Il11ra1
mmu04630	Jak-STAT signaling pathway	6	Cish;Stat5a;Socs2;Jak2;Stat4;Socs3;Il12rb1
mmu04630	Jak-STAT signaling pathway	6	Cish;Stat5a;Socs2;Jak2;Stat4;Socs3;Il13ra1
mmu04630	Jak-STAT signaling pathway	6	Cish;Stat5a;Socs2;Jak2;Stat4;Socs3;Il13ra2
mmu04630	Jak-STAT signaling pathway	6	Cish;Stat5a;Socs2;Jak2;Stat4;Socs3;Il15ra
mmu04630	Jak-STAT signaling pathway	6	Cish;Stat5a;Socs2;Jak2;Stat4;Socs3;Il20ra
mmu04630	Jak-STAT signaling pathway	6	Cish;Stat5a;Socs2;Jak2;Stat4;Socs3;Il21r
mmu04630	Jak-STAT signaling pathway	6	Cish;Stat5a;Socs2;Jak2;Stat4;Socs3;Il22ra1
mmu04630	Jak-STAT signaling pathway	6	Cish;Stat5a;Socs2;Jak2;Stat4;Socs3;Il22ra2
mmu04630	Jak-STAT signaling pathway	6	Cish;Stat5a;Socs2;Jak2;Stat4;Socs3;Il28ra
mmu04630	Jak-STAT signaling pathway	6	Cish;Stat5a;Socs2;Jak2;Stat4;Socs3;Il2ra
mmu04630	Jak-STAT signaling pathway	6	Cish;Stat5a;Socs2;Jak2;Stat4;Socs3;Il2rg
mmu04630	Jak-STAT signaling pathway	6	Cish;Stat5a;Socs2;Jak2;Stat4;Socs3;Il3ra
mmu04630	Jak-STAT signaling pathway	6	Cish;Stat5a;Socs2;Jak2;Stat4;Socs3;Il4ra
mmu04630	Jak-STAT signaling pathway	6	Cish;Stat5a;Socs2;Jak2;Stat4;Socs3;Il6ra
mmu04630	Jak-STAT signaling pathway	6	Cish;Stat5a;Socs2;Jak2;Stat4;Socs3;Il7r
mmu04630	Jak-STAT signaling pathway	6	Cish;Stat5a;Socs2;Jak2;Stat4;Socs3;Il9r
mmu04630	Jak-STAT signaling pathway	6	Cish;Stat5a;Socs2;Jak2;Stat4;Socs3;Lifr
mmu04630	Jak-STAT signaling pathway	6	Pias2;Stat5a;Socs2;Jak2;Stat4;Socs3;Cntfr
mmu04630	Jak-STAT signaling pathway	6	Pias2;Stat5a;Socs2;Jak2;Stat4;Socs3;CR974586.2
mmu04630	Jak-STAT signaling pathway	6	Pias2;Stat5a;Socs2;Jak2;Stat4;Socs3;Crlf2
mmu04630	Jak-STAT signaling pathway	6	Pias2;Stat5a;Socs2;Jak2;Stat4;Socs3;Csf2rb
mmu04630	Jak-STAT signaling pathway	6	Pias2;Stat5a;Socs2;Jak2;Stat4;Socs3;Csf2rb2
mmu04630	Jak-STAT signaling pathway	6	Pias2;Stat5a;Socs2;Jak2;Stat4;Socs3;CT868723.4
mmu04630	Jak-STAT signaling pathway	6	Pias2;Stat5a;Socs2;Jak2;Stat4;Socs3;Gm13305
mmu04630	Jak-STAT signaling pathway	6	Pias2;Stat5a;Socs2;Jak2;Stat4;Socs3;Gm2002
mmu04630	Jak-STAT signaling pathway	6	Pias2;Stat5a;Socs2;Jak2;Stat4;Socs3;Ifnar1
mmu04630	Jak-STAT signaling pathway	6	Pias2;Stat5a;Socs2;Jak2;Stat4;Socs3;Ifnar2
mmu04630	Jak-STAT signaling pathway	6	Pias2;Stat5a;Socs2;Jak2;Stat4;Socs3;Ifngr1
mmu04630	Jak-STAT signaling pathway	6	Pias2;Stat5a;Socs2;Jak2;Stat4;Socs3;Ifngr2
mmu04630	Jak-STAT signaling pathway	6	Pias2;Stat5a;Socs2;Jak2;Stat4;Socs3;Il10rb
mmu04630	Jak-STAT signaling pathway	6	Pias2;Stat5a;Socs2;Jak2;Stat4;Socs3;Il11ra1
mmu04630	Jak-STAT signaling pathway	6	Pias2;Stat5a;Socs2;Jak2;Stat4;Socs3;Il12rb1
mmu04630	Jak-STAT signaling pathway	6	Pias2;Stat5a;Socs2;Jak2;Stat4;Socs3;Il13ra1
mmu04630	Jak-STAT signaling pathway	6	Pias2;Stat5a;Socs2;Jak2;Stat4;Socs3;Il13ra2
mmu04630	Jak-STAT signaling pathway	6	Pias2;Stat5a;Socs2;Jak2;Stat4;Socs3;Il15ra
mmu04630	Jak-STAT signaling pathway	6	Pias2;Stat5a;Socs2;Jak2;Stat4;Socs3;Il20ra
mmu04630	Jak-STAT signaling pathway	6	Pias2;Stat5a;Socs2;Jak2;Stat4;Socs3;Il21r
mmu04630	Jak-STAT signaling pathway	6	Pias2;Stat5a;Socs2;Jak2;Stat4;Socs3;Il22ra1
mmu04630	Jak-STAT signaling pathway	6	Pias2;Stat5a;Socs2;Jak2;Stat4;Socs3;Il22ra2
mmu04630	Jak-STAT signaling pathway	6	Pias2;Stat5a;Socs2;Jak2;Stat4;Socs3;Il28ra
mmu04630	Jak-STAT signaling pathway	6	Pias2;Stat5a;Socs2;Jak2;Stat4;Socs3;Il2ra
mmu04630	Jak-STAT signaling pathway	6	Pias2;Stat5a;Socs2;Jak2;Stat4;Socs3;Il2rg
mmu04630	Jak-STAT signaling pathway	6	Pias2;Stat5a;Socs2;Jak2;Stat4;Socs3;Il3ra
mmu04630	Jak-STAT signaling pathway	6	Pias2;Stat5a;Socs2;Jak2;Stat4;Socs3;Il4ra
mmu04630	Jak-STAT signaling pathway	6	Pias2;Stat5a;Socs2;Jak2;Stat4;Socs3;Il6ra
mmu04630	Jak-STAT signaling pathway	6	Pias2;Stat5a;Socs2;Jak2;Stat4;Socs3;Il7r
mmu04630	Jak-STAT signaling pathway	6	Pias2;Stat5a;Socs2;Jak2;Stat4;Socs3;Il9r
mmu04630	Jak-STAT signaling pathway	6	Pias2;Stat5a;Socs2;Jak2;Stat4;Socs3;Lifr
mmu04630	Jak-STAT signaling pathway	6	Pias3;Stat5a;Socs2;Jak2;Stat4;Socs3;Cntfr
mmu04630	Jak-STAT signaling pathway	6	Pias3;Stat5a;Socs2;Jak2;Stat4;Socs3;CR974586.2
mmu04630	Jak-STAT signaling pathway	6	Pias3;Stat5a;Socs2;Jak2;Stat4;Socs3;Crlf2
mmu04630	Jak-STAT signaling pathway	6	Pias3;Stat5a;Socs2;Jak2;Stat4;Socs3;Csf2rb
mmu04630	Jak-STAT signaling pathway	6	Pias3;Stat5a;Socs2;Jak2;Stat4;Socs3;Csf2rb2
mmu04630	Jak-STAT signaling pathway	6	Pias3;Stat5a;Socs2;Jak2;Stat4;Socs3;CT868723.4
mmu04630	Jak-STAT signaling pathway	6	Pias3;Stat5a;Socs2;Jak2;Stat4;Socs3;Gm13305
mmu04630	Jak-STAT signaling pathway	6	Pias3;Stat5a;Socs2;Jak2;Stat4;Socs3;Gm2002
mmu04630	Jak-STAT signaling pathway	6	Pias3;Stat5a;Socs2;Jak2;Stat4;Socs3;Ifnar1
mmu04630	Jak-STAT signaling pathway	6	Pias3;Stat5a;Socs2;Jak2;Stat4;Socs3;Ifnar2
mmu04630	Jak-STAT signaling pathway	6	Pias3;Stat5a;Socs2;Jak2;Stat4;Socs3;Ifngr1
mmu04630	Jak-STAT signaling pathway	6	Pias3;Stat5a;Socs2;Jak2;Stat4;Socs3;Ifngr2
mmu04630	Jak-STAT signaling pathway	6	Pias3;Stat5a;Socs2;Jak2;Stat4;Socs3;Il10rb
mmu04630	Jak-STAT signaling pathway	6	Pias3;Stat5a;Socs2;Jak2;Stat4;Socs3;Il11ra1
mmu04630	Jak-STAT signaling pathway	6	Pias3;Stat5a;Socs2;Jak2;Stat4;Socs3;Il12rb1
mmu04630	Jak-STAT signaling pathway	6	Pias3;Stat5a;Socs2;Jak2;Stat4;Socs3;Il13ra1
mmu04630	Jak-STAT signaling pathway	6	Pias3;Stat5a;Socs2;Jak2;Stat4;Socs3;Il13ra2
mmu04630	Jak-STAT signaling pathway	6	Pias3;Stat5a;Socs2;Jak2;Stat4;Socs3;Il15ra
mmu04630	Jak-STAT signaling pathway	6	Pias3;Stat5a;Socs2;Jak2;Stat4;Socs3;Il20ra
mmu04630	Jak-STAT signaling pathway	6	Pias3;Stat5a;Socs2;Jak2;Stat4;Socs3;Il21r
mmu04630	Jak-STAT signaling pathway	6	Pias3;Stat5a;Socs2;Jak2;Stat4;Socs3;Il22ra1
mmu04630	Jak-STAT signaling pathway	6	Pias3;Stat5a;Socs2;Jak2;Stat4;Socs3;Il22ra2
mmu04630	Jak-STAT signaling pathway	6	Pias3;Stat5a;Socs2;Jak2;Stat4;Socs3;Il28ra
mmu04630	Jak-STAT signaling pathway	6	Pias3;Stat5a;Socs2;Jak2;Stat4;Socs3;Il2ra
mmu04630	Jak-STAT signaling pathway	6	Pias3;Stat5a;Socs2;Jak2;Stat4;Socs3;Il2rg
mmu04630	Jak-STAT signaling pathway	6	Pias3;Stat5a;Socs2;Jak2;Stat4;Socs3;Il3ra
mmu04630	Jak-STAT signaling pathway	6	Pias3;Stat5a;Socs2;Jak2;Stat4;Socs3;Il4ra
mmu04630	Jak-STAT signaling pathway	6	Pias3;Stat5a;Socs2;Jak2;Stat4;Socs3;Il6ra
mmu04630	Jak-STAT signaling pathway	6	Pias3;Stat5a;Socs2;Jak2;Stat4;Socs3;Il7r
mmu04630	Jak-STAT signaling pathway	6	Pias3;Stat5a;Socs2;Jak2;Stat4;Socs3;Il9r
mmu04630	Jak-STAT signaling pathway	6	Pias3;Stat5a;Socs2;Jak2;Stat4;Socs3;Lifr
mmu04630	Jak-STAT signaling pathway	6	Stat5b;Socs3;Cntfr;Jak2;Stat5a;Socs4;Il2rb
mmu04630	Jak-STAT signaling pathway	6	Stat5b;Socs3;Cntfr;Jak2;Stat5a;Socs4;Tyk2
mmu04630	Jak-STAT signaling pathway	6	Stat2;Socs3;Cntfr;Jak2;Stat5a;Socs4;Il2rb
mmu04630	Jak-STAT signaling pathway	6	Stat2;Socs3;Cntfr;Jak2;Stat5a;Socs4;Tyk2
mmu04630	Jak-STAT signaling pathway	6	Stat4;Socs3;Cntfr;Jak2;Stat5a;Socs4;Il2rb
mmu04630	Jak-STAT signaling pathway	6	Stat4;Socs3;Cntfr;Jak2;Stat5a;Socs4;Tyk2
mmu04062	Chemokine signaling pathway	5	Grk1;Cxcr4;Gnai3;Src;Elmo1-Dock2;Rac1
mmu04062	Chemokine signaling pathway	5	Grk1;Cxcr4;Gnai3;Src;Elmo1-Dock2;Rac2
mmu04062	Chemokine signaling pathway	5	Grk1;Cxcr4;Gnai3;Src;Pik3ca;Akt2
mmu04062	Chemokine signaling pathway	5	Grk1;Cxcr4;Gnai3;Src;Pik3ca;Akt3
mmu04062	Chemokine signaling pathway	5	Grk1;Cxcr4;Gnai3;Src;Pik3cb;Akt1
mmu04062	Chemokine signaling pathway	5	Grk1;Cxcr4;Gnai3;Src;Pik3r3;Prkcz
mmu04062	Chemokine signaling pathway	5	Grk1;Cxcr4;Gnai3;Src;Pik3r5;Hras1
mmu04062	Chemokine signaling pathway	5	Grk1;Cxcr4;Gnai3;Src;Pik3r5;Itk
mmu04062	Chemokine signaling pathway	5	Grk1;Cxcr4;Gnai3;Src;Pik3r5;Kras
mmu04062	Chemokine signaling pathway	5	Grk1;Cxcr4;Gnai3;Src;Pik3r5;Nras
mmu04062	Chemokine signaling pathway	5	Grk1;Cxcr4;Gnai3;Src;Pik3r5;Prex1
mmu04062	Chemokine signaling pathway	5	Grk1;Cxcr4;Gnai3;Src;Pik3r5;Ptk2
mmu04062	Chemokine signaling pathway	5	Grk1;Cxcr4;Gnai3;Src;Shc2;Grb2
mmu04062	Chemokine signaling pathway	5	Ccl3;Ccr2;Gnai1;Src;Elmo1-Dock2;Rac1
mmu04062	Chemokine signaling pathway	5	Ccl3;Ccr2;Gnai1;Src;Elmo1-Dock2;Rac2
mmu04062	Chemokine signaling pathway	5	Ccl3;Ccr2;Gnai1;Src;Pik3ca;Akt2
mmu04062	Chemokine signaling pathway	5	Ccl3;Ccr2;Gnai1;Src;Pik3ca;Akt3
mmu04062	Chemokine signaling pathway	5	Ccl3;Ccr2;Gnai1;Src;Pik3cb;Akt1
mmu04062	Chemokine signaling pathway	5	Ccl3;Ccr2;Gnai1;Src;Pik3r3;Prkcz
mmu04062	Chemokine signaling pathway	5	Ccl3;Ccr2;Gnai1;Src;Pik3r5;Hras1
mmu04062	Chemokine signaling pathway	5	Ccl3;Ccr2;Gnai1;Src;Pik3r5;Itk
mmu04062	Chemokine signaling pathway	5	Ccl3;Ccr2;Gnai1;Src;Pik3r5;Kras
mmu04062	Chemokine signaling pathway	5	Ccl3;Ccr2;Gnai1;Src;Pik3r5;Nras
mmu04062	Chemokine signaling pathway	5	Ccl3;Ccr2;Gnai1;Src;Pik3r5;Prex1
mmu04062	Chemokine signaling pathway	5	Ccl3;Ccr2;Gnai1;Src;Pik3r5;Ptk2
mmu04062	Chemokine signaling pathway	5	Ccl3;Ccr2;Gnai1;Src;Shc2;Grb2
mmu04062	Chemokine signaling pathway	5	Ccl22;Ccr2;Gnai1;Src;Elmo1-Dock2;Rac1
mmu04062	Chemokine signaling pathway	5	Ccl22;Ccr2;Gnai1;Src;Elmo1-Dock2;Rac2
mmu04062	Chemokine signaling pathway	5	Ccl22;Ccr2;Gnai1;Src;Pik3ca;Akt2
mmu04062	Chemokine signaling pathway	5	Ccl22;Ccr2;Gnai1;Src;Pik3ca;Akt3
mmu04062	Chemokine signaling pathway	5	Ccl22;Ccr2;Gnai1;Src;Pik3cb;Akt1
mmu04062	Chemokine signaling pathway	5	Ccl22;Ccr2;Gnai1;Src;Pik3r3;Prkcz
mmu04062	Chemokine signaling pathway	5	Ccl22;Ccr2;Gnai1;Src;Pik3r5;Hras1
mmu04062	Chemokine signaling pathway	5	Ccl22;Ccr2;Gnai1;Src;Pik3r5;Itk
mmu04062	Chemokine signaling pathway	5	Ccl22;Ccr2;Gnai1;Src;Pik3r5;Kras
mmu04062	Chemokine signaling pathway	5	Ccl22;Ccr2;Gnai1;Src;Pik3r5;Nras
mmu04062	Chemokine signaling pathway	5	Ccl22;Ccr2;Gnai1;Src;Pik3r5;Prex1
mmu04062	Chemokine signaling pathway	5	Ccl22;Ccr2;Gnai1;Src;Pik3r5;Ptk2
mmu04062	Chemokine signaling pathway	5	Ccl22;Ccr2;Gnai1;Src;Shc2;Grb2
mmu04062	Chemokine signaling pathway	5	Grk5;Cxcr4;Gnai3;Src;Elmo1-Dock2;Rac1
mmu04062	Chemokine signaling pathway	5	Grk5;Cxcr4;Gnai3;Src;Elmo1-Dock2;Rac2
mmu04062	Chemokine signaling pathway	5	Grk5;Cxcr4;Gnai3;Src;Pik3ca;Akt2
mmu04062	Chemokine signaling pathway	5	Grk5;Cxcr4;Gnai3;Src;Pik3ca;Akt3
mmu04062	Chemokine signaling pathway	5	Grk5;Cxcr4;Gnai3;Src;Pik3cb;Akt1
mmu04062	Chemokine signaling pathway	5	Grk5;Cxcr4;Gnai3;Src;Pik3r3;Prkcz
mmu04062	Chemokine signaling pathway	5	Grk5;Cxcr4;Gnai3;Src;Pik3r5;Hras1
mmu04062	Chemokine signaling pathway	5	Grk5;Cxcr4;Gnai3;Src;Pik3r5;Itk
mmu04062	Chemokine signaling pathway	5	Grk5;Cxcr4;Gnai3;Src;Pik3r5;Kras
mmu04062	Chemokine signaling pathway	5	Grk5;Cxcr4;Gnai3;Src;Pik3r5;Nras
mmu04062	Chemokine signaling pathway	5	Grk5;Cxcr4;Gnai3;Src;Pik3r5;Prex1
mmu04062	Chemokine signaling pathway	5	Grk5;Cxcr4;Gnai3;Src;Pik3r5;Ptk2
mmu04062	Chemokine signaling pathway	5	Grk5;Cxcr4;Gnai3;Src;Shc2;Grb2
mmu04062	Chemokine signaling pathway	5	Ccl4;Ccr2;Gnai1;Src;Elmo1-Dock2;Rac1
mmu04062	Chemokine signaling pathway	5	Ccl4;Ccr2;Gnai1;Src;Elmo1-Dock2;Rac2
mmu04062	Chemokine signaling pathway	5	Ccl4;Ccr2;Gnai1;Src;Pik3ca;Akt2
mmu04062	Chemokine signaling pathway	5	Ccl4;Ccr2;Gnai1;Src;Pik3ca;Akt3
mmu04062	Chemokine signaling pathway	5	Ccl4;Ccr2;Gnai1;Src;Pik3cb;Akt1
mmu04062	Chemokine signaling pathway	5	Ccl4;Ccr2;Gnai1;Src;Pik3r3;Prkcz
mmu04062	Chemokine signaling pathway	5	Ccl4;Ccr2;Gnai1;Src;Pik3r5;Hras1
mmu04062	Chemokine signaling pathway	5	Ccl4;Ccr2;Gnai1;Src;Pik3r5;Itk
mmu04062	Chemokine signaling pathway	5	Ccl4;Ccr2;Gnai1;Src;Pik3r5;Kras
mmu04062	Chemokine signaling pathway	5	Ccl4;Ccr2;Gnai1;Src;Pik3r5;Nras
mmu04062	Chemokine signaling pathway	5	Ccl4;Ccr2;Gnai1;Src;Pik3r5;Prex1
mmu04062	Chemokine signaling pathway	5	Ccl4;Ccr2;Gnai1;Src;Pik3r5;Ptk2
mmu04062	Chemokine signaling pathway	5	Ccl4;Ccr2;Gnai1;Src;Shc2;Grb2
mmu04062	Chemokine signaling pathway	5	Adrbk1;Cxcr4;Gnai3;Src;Elmo1-Dock2;Rac1
mmu04062	Chemokine signaling pathway	5	Adrbk1;Cxcr4;Gnai3;Src;Elmo1-Dock2;Rac2
mmu04062	Chemokine signaling pathway	5	Adrbk1;Cxcr4;Gnai3;Src;Pik3ca;Akt2
mmu04062	Chemokine signaling pathway	5	Adrbk1;Cxcr4;Gnai3;Src;Pik3ca;Akt3
mmu04062	Chemokine signaling pathway	5	Adrbk1;Cxcr4;Gnai3;Src;Pik3cb;Akt1
mmu04062	Chemokine signaling pathway	5	Adrbk1;Cxcr4;Gnai3;Src;Pik3r3;Prkcz
mmu04062	Chemokine signaling pathway	5	Adrbk1;Cxcr4;Gnai3;Src;Pik3r5;Hras1
mmu04062	Chemokine signaling pathway	5	Adrbk1;Cxcr4;Gnai3;Src;Pik3r5;Itk
mmu04062	Chemokine signaling pathway	5	Adrbk1;Cxcr4;Gnai3;Src;Pik3r5;Kras
mmu04062	Chemokine signaling pathway	5	Adrbk1;Cxcr4;Gnai3;Src;Pik3r5;Nras
mmu04062	Chemokine signaling pathway	5	Adrbk1;Cxcr4;Gnai3;Src;Pik3r5;Prex1
mmu04062	Chemokine signaling pathway	5	Adrbk1;Cxcr4;Gnai3;Src;Pik3r5;Ptk2
mmu04062	Chemokine signaling pathway	5	Adrbk1;Cxcr4;Gnai3;Src;Shc2;Grb2
mmu04062	Chemokine signaling pathway	5	Grk4;Cxcr4;Gnai3;Src;Elmo1-Dock2;Rac1
mmu04062	Chemokine signaling pathway	5	Grk4;Cxcr4;Gnai3;Src;Elmo1-Dock2;Rac2
mmu04062	Chemokine signaling pathway	5	Grk4;Cxcr4;Gnai3;Src;Pik3ca;Akt2
mmu04062	Chemokine signaling pathway	5	Grk4;Cxcr4;Gnai3;Src;Pik3ca;Akt3
mmu04062	Chemokine signaling pathway	5	Grk4;Cxcr4;Gnai3;Src;Pik3cb;Akt1
mmu04062	Chemokine signaling pathway	5	Grk4;Cxcr4;Gnai3;Src;Pik3r3;Prkcz
mmu04062	Chemokine signaling pathway	5	Grk4;Cxcr4;Gnai3;Src;Pik3r5;Hras1
mmu04062	Chemokine signaling pathway	5	Grk4;Cxcr4;Gnai3;Src;Pik3r5;Itk
mmu04062	Chemokine signaling pathway	5	Grk4;Cxcr4;Gnai3;Src;Pik3r5;Kras
mmu04062	Chemokine signaling pathway	5	Grk4;Cxcr4;Gnai3;Src;Pik3r5;Nras
mmu04062	Chemokine signaling pathway	5	Grk4;Cxcr4;Gnai3;Src;Pik3r5;Prex1
mmu04062	Chemokine signaling pathway	5	Grk4;Cxcr4;Gnai3;Src;Pik3r5;Ptk2
mmu04062	Chemokine signaling pathway	5	Grk4;Cxcr4;Gnai3;Src;Shc2;Grb2
mmu04630	Jak-STAT signaling pathway	5	Stat1;Socs3;Cntfr;Jak2;Pik3ca;Akt2
mmu04630	Jak-STAT signaling pathway	5	Stat1;Socs3;Cntfr;Jak2;Pik3ca;Akt3
mmu04630	Jak-STAT signaling pathway	5	Stat1;Socs3;Cntfr;Jak2;Pik3cb;Akt1
mmu04630	Jak-STAT signaling pathway	5	Stat1;Socs3;Cntfr;Jak2;Stat5a;Ccnd1
mmu04630	Jak-STAT signaling pathway	5	Stat1;Socs3;Cntfr;Jak2;Stat5a;Ccnd3
mmu04630	Jak-STAT signaling pathway	5	Stat1;Socs3;Cntfr;Jak2;Stat5a;Myc
mmu04630	Jak-STAT signaling pathway	5	Stat1;Socs3;Cntfr;Jak2;Stat5a;Pim1
mmu04630	Jak-STAT signaling pathway	5	Stat1;Socs3;Cntfr;Jak2;Stat5a;Socs1
mmu04630	Jak-STAT signaling pathway	5	Stat1;Socs3;Cntfr;Jak2;Stat5a;Socs2
mmu04630	Jak-STAT signaling pathway	5	Stat1;Socs3;Cntfr;Jak2;Stat5a;Socs5
mmu04630	Jak-STAT signaling pathway	5	Stat1;Socs3;Cntfr;Jak2;Stat5a;Socs7
mmu04630	Jak-STAT signaling pathway	5	Pias1;Stat5a;Socs2;Jak2;Pik3ca;Akt2
mmu04630	Jak-STAT signaling pathway	5	Pias1;Stat5a;Socs2;Jak2;Pik3ca;Akt3
mmu04630	Jak-STAT signaling pathway	5	Pias1;Stat5a;Socs2;Jak2;Pik3cb;Akt1
mmu04630	Jak-STAT signaling pathway	5	Pias4;Stat5a;Socs2;Jak2;Pik3ca;Akt2
mmu04630	Jak-STAT signaling pathway	5	Pias4;Stat5a;Socs2;Jak2;Pik3ca;Akt3
mmu04630	Jak-STAT signaling pathway	5	Pias4;Stat5a;Socs2;Jak2;Pik3cb;Akt1
mmu04630	Jak-STAT signaling pathway	5	Stat6;Socs3;Cntfr;Jak2;Pik3ca;Akt2
mmu04630	Jak-STAT signaling pathway	5	Stat6;Socs3;Cntfr;Jak2;Pik3ca;Akt3
mmu04630	Jak-STAT signaling pathway	5	Stat6;Socs3;Cntfr;Jak2;Pik3cb;Akt1
mmu04630	Jak-STAT signaling pathway	5	Jak3;Stat6;Socs3;Cntfr;Jak2;Pik3ca
mmu04630	Jak-STAT signaling pathway	5	Jak3;Stat6;Socs3;Cntfr;Jak2;Pik3cb
mmu04630	Jak-STAT signaling pathway	5	Jak3;Stat6;Socs3;Cntfr;Jak2;Pik3cd
mmu04630	Jak-STAT signaling pathway	5	Jak3;Stat6;Socs3;Cntfr;Jak2;Pik3cg
mmu04630	Jak-STAT signaling pathway	5	Jak3;Stat6;Socs3;Cntfr;Jak2;Pik3r2
mmu04630	Jak-STAT signaling pathway	5	Jak3;Stat6;Socs3;Cntfr;Jak2;Pik3r3
mmu04630	Jak-STAT signaling pathway	5	Jak3;Stat6;Socs3;Cntfr;Jak2;Stat4
mmu04630	Jak-STAT signaling pathway	5	Cish;Stat5a;Socs2;Jak2;Pik3ca;Akt2
mmu04630	Jak-STAT signaling pathway	5	Cish;Stat5a;Socs2;Jak2;Pik3ca;Akt3
mmu04630	Jak-STAT signaling pathway	5	Cish;Stat5a;Socs2;Jak2;Pik3cb;Akt1
mmu04630	Jak-STAT signaling pathway	5	Pias2;Stat5a;Socs2;Jak2;Pik3ca;Akt2
mmu04630	Jak-STAT signaling pathway	5	Pias2;Stat5a;Socs2;Jak2;Pik3ca;Akt3
mmu04630	Jak-STAT signaling pathway	5	Pias2;Stat5a;Socs2;Jak2;Pik3cb;Akt1
mmu04630	Jak-STAT signaling pathway	5	Pias3;Stat5a;Socs2;Jak2;Pik3ca;Akt2
mmu04630	Jak-STAT signaling pathway	5	Pias3;Stat5a;Socs2;Jak2;Pik3ca;Akt3
mmu04630	Jak-STAT signaling pathway	5	Pias3;Stat5a;Socs2;Jak2;Pik3cb;Akt1
mmu04630	Jak-STAT signaling pathway	5	Stat5b;Socs3;Cntfr;Jak2;Pik3ca;Akt2
mmu04630	Jak-STAT signaling pathway	5	Stat5b;Socs3;Cntfr;Jak2;Pik3ca;Akt3
mmu04630	Jak-STAT signaling pathway	5	Stat5b;Socs3;Cntfr;Jak2;Pik3cb;Akt1
mmu04630	Jak-STAT signaling pathway	5	Stat5b;Socs3;Cntfr;Jak2;Stat5a;Ccnd1
mmu04630	Jak-STAT signaling pathway	5	Stat5b;Socs3;Cntfr;Jak2;Stat5a;Ccnd3
mmu04630	Jak-STAT signaling pathway	5	Stat5b;Socs3;Cntfr;Jak2;Stat5a;Myc
mmu04630	Jak-STAT signaling pathway	5	Stat5b;Socs3;Cntfr;Jak2;Stat5a;Pim1
mmu04630	Jak-STAT signaling pathway	5	Stat5b;Socs3;Cntfr;Jak2;Stat5a;Socs1
mmu04630	Jak-STAT signaling pathway	5	Stat5b;Socs3;Cntfr;Jak2;Stat5a;Socs2
mmu04630	Jak-STAT signaling pathway	5	Stat5b;Socs3;Cntfr;Jak2;Stat5a;Socs5
mmu04630	Jak-STAT signaling pathway	5	Stat5b;Socs3;Cntfr;Jak2;Stat5a;Socs7
mmu04630	Jak-STAT signaling pathway	5	Stat2;Socs3;Cntfr;Jak2;Pik3ca;Akt2
mmu04630	Jak-STAT signaling pathway	5	Stat2;Socs3;Cntfr;Jak2;Pik3ca;Akt3
mmu04630	Jak-STAT signaling pathway	5	Stat2;Socs3;Cntfr;Jak2;Pik3cb;Akt1
mmu04630	Jak-STAT signaling pathway	5	Stat2;Socs3;Cntfr;Jak2;Stat5a;Ccnd1
mmu04630	Jak-STAT signaling pathway	5	Stat2;Socs3;Cntfr;Jak2;Stat5a;Ccnd3
mmu04630	Jak-STAT signaling pathway	5	Stat2;Socs3;Cntfr;Jak2;Stat5a;Myc
mmu04630	Jak-STAT signaling pathway	5	Stat2;Socs3;Cntfr;Jak2;Stat5a;Pim1
mmu04630	Jak-STAT signaling pathway	5	Stat2;Socs3;Cntfr;Jak2;Stat5a;Socs1
mmu04630	Jak-STAT signaling pathway	5	Stat2;Socs3;Cntfr;Jak2;Stat5a;Socs2
mmu04630	Jak-STAT signaling pathway	5	Stat2;Socs3;Cntfr;Jak2;Stat5a;Socs5
mmu04630	Jak-STAT signaling pathway	5	Stat2;Socs3;Cntfr;Jak2;Stat5a;Socs7
mmu04630	Jak-STAT signaling pathway	5	Socs4;Il2rb;Jak2;Stat4;Socs3;Cntfr
mmu04630	Jak-STAT signaling pathway	5	Socs4;Il2rb;Jak2;Stat4;Socs3;CR974586.2
mmu04630	Jak-STAT signaling pathway	5	Socs4;Il2rb;Jak2;Stat4;Socs3;Crlf2
mmu04630	Jak-STAT signaling pathway	5	Socs4;Il2rb;Jak2;Stat4;Socs3;Csf2rb
mmu04630	Jak-STAT signaling pathway	5	Socs4;Il2rb;Jak2;Stat4;Socs3;Csf2rb2
mmu04630	Jak-STAT signaling pathway	5	Socs4;Il2rb;Jak2;Stat4;Socs3;CT868723.4
mmu04630	Jak-STAT signaling pathway	5	Socs4;Il2rb;Jak2;Stat4;Socs3;Gm13305
mmu04630	Jak-STAT signaling pathway	5	Socs4;Il2rb;Jak2;Stat4;Socs3;Gm2002
mmu04630	Jak-STAT signaling pathway	5	Socs4;Il2rb;Jak2;Stat4;Socs3;Ifnar1
mmu04630	Jak-STAT signaling pathway	5	Socs4;Il2rb;Jak2;Stat4;Socs3;Ifnar2
mmu04630	Jak-STAT signaling pathway	5	Socs4;Il2rb;Jak2;Stat4;Socs3;Ifngr1
mmu04630	Jak-STAT signaling pathway	5	Socs4;Il2rb;Jak2;Stat4;Socs3;Ifngr2
mmu04630	Jak-STAT signaling pathway	5	Socs4;Il2rb;Jak2;Stat4;Socs3;Il10rb
mmu04630	Jak-STAT signaling pathway	5	Socs4;Il2rb;Jak2;Stat4;Socs3;Il11ra1
mmu04630	Jak-STAT signaling pathway	5	Socs4;Il2rb;Jak2;Stat4;Socs3;Il12rb1
mmu04630	Jak-STAT signaling pathway	5	Socs4;Il2rb;Jak2;Stat4;Socs3;Il13ra1
mmu04630	Jak-STAT signaling pathway	5	Socs4;Il2rb;Jak2;Stat4;Socs3;Il13ra2
mmu04630	Jak-STAT signaling pathway	5	Socs4;Il2rb;Jak2;Stat4;Socs3;Il15ra
mmu04630	Jak-STAT signaling pathway	5	Socs4;Il2rb;Jak2;Stat4;Socs3;Il20ra
mmu04630	Jak-STAT signaling pathway	5	Socs4;Il2rb;Jak2;Stat4;Socs3;Il21r
mmu04630	Jak-STAT signaling pathway	5	Socs4;Il2rb;Jak2;Stat4;Socs3;Il22ra1
mmu04630	Jak-STAT signaling pathway	5	Socs4;Il2rb;Jak2;Stat4;Socs3;Il22ra2
mmu04630	Jak-STAT signaling pathway	5	Socs4;Il2rb;Jak2;Stat4;Socs3;Il28ra
mmu04630	Jak-STAT signaling pathway	5	Socs4;Il2rb;Jak2;Stat4;Socs3;Il2ra
mmu04630	Jak-STAT signaling pathway	5	Socs4;Il2rb;Jak2;Stat4;Socs3;Il2rg
mmu04630	Jak-STAT signaling pathway	5	Socs4;Il2rb;Jak2;Stat4;Socs3;Il3ra
mmu04630	Jak-STAT signaling pathway	5	Socs4;Il2rb;Jak2;Stat4;Socs3;Il4ra
mmu04630	Jak-STAT signaling pathway	5	Socs4;Il2rb;Jak2;Stat4;Socs3;Il6ra
mmu04630	Jak-STAT signaling pathway	5	Socs4;Il2rb;Jak2;Stat4;Socs3;Il7r
mmu04630	Jak-STAT signaling pathway	5	Socs4;Il2rb;Jak2;Stat4;Socs3;Il9r
mmu04630	Jak-STAT signaling pathway	5	Socs4;Il2rb;Jak2;Stat4;Socs3;Lifr
mmu04630	Jak-STAT signaling pathway	5	Stat4;Socs3;Cntfr;Jak2;Pik3ca;Akt2
mmu04630	Jak-STAT signaling pathway	5	Stat4;Socs3;Cntfr;Jak2;Pik3ca;Akt3
mmu04630	Jak-STAT signaling pathway	5	Stat4;Socs3;Cntfr;Jak2;Pik3cb;Akt1
mmu04630	Jak-STAT signaling pathway	5	Stat4;Socs3;Cntfr;Jak2;Stat5a;Ccnd1
mmu04630	Jak-STAT signaling pathway	5	Stat4;Socs3;Cntfr;Jak2;Stat5a;Ccnd3
mmu04630	Jak-STAT signaling pathway	5	Stat4;Socs3;Cntfr;Jak2;Stat5a;Myc
mmu04630	Jak-STAT signaling pathway	5	Stat4;Socs3;Cntfr;Jak2;Stat5a;Pim1
mmu04630	Jak-STAT signaling pathway	5	Stat4;Socs3;Cntfr;Jak2;Stat5a;Socs1
mmu04630	Jak-STAT signaling pathway	5	Stat4;Socs3;Cntfr;Jak2;Stat5a;Socs2
mmu04630	Jak-STAT signaling pathway	5	Stat4;Socs3;Cntfr;Jak2;Stat5a;Socs5
mmu04630	Jak-STAT signaling pathway	5	Stat4;Socs3;Cntfr;Jak2;Stat5a;Socs7
mmu04062	Chemokine signaling pathway	4	Grk1;Cxcr4;Gnai3;Src;Pik3cg
mmu04062	Chemokine signaling pathway	4	Grk1;Cxcr4;Gnai3;Src;Pik3r2
mmu04062	Chemokine signaling pathway	4	Grk1;Cxcr4;Gnai3;Src;Shc3
mmu04062	Chemokine signaling pathway	4	Grk1;Cxcr4;Gnai3;Src;Shc4
mmu04062	Chemokine signaling pathway	4	Ccl3;Ccr2;Gnai1;Src;Pik3cg
mmu04062	Chemokine signaling pathway	4	Ccl3;Ccr2;Gnai1;Src;Pik3r2
mmu04062	Chemokine signaling pathway	4	Ccl3;Ccr2;Gnai1;Src;Shc3
mmu04062	Chemokine signaling pathway	4	Ccl3;Ccr2;Gnai1;Src;Shc4
mmu04062	Chemokine signaling pathway	4	Ccl22;Ccr2;Gnai1;Src;Pik3cg
mmu04062	Chemokine signaling pathway	4	Ccl22;Ccr2;Gnai1;Src;Pik3r2
mmu04062	Chemokine signaling pathway	4	Ccl22;Ccr2;Gnai1;Src;Shc3
mmu04062	Chemokine signaling pathway	4	Ccl22;Ccr2;Gnai1;Src;Shc4
mmu04062	Chemokine signaling pathway	4	Ccr7;Gnai1;Src;Elmo1-Dock2;Rac1
mmu04062	Chemokine signaling pathway	4	Ccr7;Gnai1;Src;Elmo1-Dock2;Rac2
mmu04062	Chemokine signaling pathway	4	Ccr7;Gnai1;Src;Pik3ca;Akt2
mmu04062	Chemokine signaling pathway	4	Ccr7;Gnai1;Src;Pik3ca;Akt3
mmu04062	Chemokine signaling pathway	4	Ccr7;Gnai1;Src;Pik3cb;Akt1
mmu04062	Chemokine signaling pathway	4	Ccr7;Gnai1;Src;Pik3r3;Prkcz
mmu04062	Chemokine signaling pathway	4	Ccr7;Gnai1;Src;Pik3r5;Hras1
mmu04062	Chemokine signaling pathway	4	Ccr7;Gnai1;Src;Pik3r5;Itk
mmu04062	Chemokine signaling pathway	4	Ccr7;Gnai1;Src;Pik3r5;Kras
mmu04062	Chemokine signaling pathway	4	Ccr7;Gnai1;Src;Pik3r5;Nras
mmu04062	Chemokine signaling pathway	4	Ccr7;Gnai1;Src;Pik3r5;Prex1
mmu04062	Chemokine signaling pathway	4	Ccr7;Gnai1;Src;Pik3r5;Ptk2
mmu04062	Chemokine signaling pathway	4	Ccr7;Gnai1;Src;Shc2;Grb2
mmu04062	Chemokine signaling pathway	4	Grk5;Cxcr4;Gnai3;Src;Pik3cg
mmu04062	Chemokine signaling pathway	4	Grk5;Cxcr4;Gnai3;Src;Pik3r2
mmu04062	Chemokine signaling pathway	4	Grk5;Cxcr4;Gnai3;Src;Shc3
mmu04062	Chemokine signaling pathway	4	Grk5;Cxcr4;Gnai3;Src;Shc4
mmu04062	Chemokine signaling pathway	4	Ccr5;Gnai2;Src;Elmo1-Dock2;Rac1
mmu04062	Chemokine signaling pathway	4	Ccr5;Gnai2;Src;Elmo1-Dock2;Rac2
mmu04062	Chemokine signaling pathway	4	Ccr5;Gnai2;Src;Pik3ca;Akt2
mmu04062	Chemokine signaling pathway	4	Ccr5;Gnai2;Src;Pik3ca;Akt3
mmu04062	Chemokine signaling pathway	4	Ccr5;Gnai2;Src;Pik3cb;Akt1
mmu04062	Chemokine signaling pathway	4	Ccr5;Gnai2;Src;Pik3r3;Prkcz
mmu04062	Chemokine signaling pathway	4	Ccr5;Gnai2;Src;Pik3r5;Hras1
mmu04062	Chemokine signaling pathway	4	Ccr5;Gnai2;Src;Pik3r5;Itk
mmu04062	Chemokine signaling pathway	4	Ccr5;Gnai2;Src;Pik3r5;Kras
mmu04062	Chemokine signaling pathway	4	Ccr5;Gnai2;Src;Pik3r5;Nras
mmu04062	Chemokine signaling pathway	4	Ccr5;Gnai2;Src;Pik3r5;Prex1
mmu04062	Chemokine signaling pathway	4	Ccr5;Gnai2;Src;Pik3r5;Ptk2
mmu04062	Chemokine signaling pathway	4	Ccr5;Gnai2;Src;Shc2;Grb2
mmu04062	Chemokine signaling pathway	4	Ccl4;Ccr2;Gnai1;Src;Pik3cg
mmu04062	Chemokine signaling pathway	4	Ccl4;Ccr2;Gnai1;Src;Pik3r2
mmu04062	Chemokine signaling pathway	4	Ccl4;Ccr2;Gnai1;Src;Shc3
mmu04062	Chemokine signaling pathway	4	Ccl4;Ccr2;Gnai1;Src;Shc4
mmu04062	Chemokine signaling pathway	4	Adrbk1;Cxcr4;Gnai3;Src;Pik3cg
mmu04062	Chemokine signaling pathway	4	Adrbk1;Cxcr4;Gnai3;Src;Pik3r2
mmu04062	Chemokine signaling pathway	4	Adrbk1;Cxcr4;Gnai3;Src;Shc3
mmu04062	Chemokine signaling pathway	4	Adrbk1;Cxcr4;Gnai3;Src;Shc4
mmu04062	Chemokine signaling pathway	4	Grk4;Cxcr4;Gnai3;Src;Pik3cg
mmu04062	Chemokine signaling pathway	4	Grk4;Cxcr4;Gnai3;Src;Pik3r2
mmu04062	Chemokine signaling pathway	4	Grk4;Cxcr4;Gnai3;Src;Shc3
mmu04062	Chemokine signaling pathway	4	Grk4;Cxcr4;Gnai3;Src;Shc4
mmu04110	Cell cycle	4	Atm;Trp53;Gadd45b;Ccnb3;Plk1
mmu04610	Complement and coagulation cascades	4	F3;F3-F7;F10;F2;F9
mmu04630	Jak-STAT signaling pathway	4	Il10rb;Jak2;Stat4;Socs3;Cntfr
mmu04630	Jak-STAT signaling pathway	4	Il10rb;Jak2;Stat4;Socs3;CR974586.2
mmu04630	Jak-STAT signaling pathway	4	Il10rb;Jak2;Stat4;Socs3;Crlf2
mmu04630	Jak-STAT signaling pathway	4	Il10rb;Jak2;Stat4;Socs3;Csf2rb
mmu04630	Jak-STAT signaling pathway	4	Il10rb;Jak2;Stat4;Socs3;Csf2rb2
mmu04630	Jak-STAT signaling pathway	4	Il10rb;Jak2;Stat4;Socs3;CT868723.4
mmu04630	Jak-STAT signaling pathway	4	Il10rb;Jak2;Stat4;Socs3;Gm13305
mmu04630	Jak-STAT signaling pathway	4	Il10rb;Jak2;Stat4;Socs3;Gm2002
mmu04630	Jak-STAT signaling pathway	4	Il10rb;Jak2;Stat4;Socs3;Ifnar1
mmu04630	Jak-STAT signaling pathway	4	Il10rb;Jak2;Stat4;Socs3;Ifnar2
mmu04630	Jak-STAT signaling pathway	4	Il10rb;Jak2;Stat4;Socs3;Ifngr1
mmu04630	Jak-STAT signaling pathway	4	Il10rb;Jak2;Stat4;Socs3;Ifngr2
mmu04630	Jak-STAT signaling pathway	4	Il10rb;Jak2;Stat4;Socs3;Il11ra1
mmu04630	Jak-STAT signaling pathway	4	Il10rb;Jak2;Stat4;Socs3;Il12rb1
mmu04630	Jak-STAT signaling pathway	4	Il10rb;Jak2;Stat4;Socs3;Il13ra1
mmu04630	Jak-STAT signaling pathway	4	Il10rb;Jak2;Stat4;Socs3;Il13ra2
mmu04630	Jak-STAT signaling pathway	4	Il10rb;Jak2;Stat4;Socs3;Il15ra
mmu04630	Jak-STAT signaling pathway	4	Il10rb;Jak2;Stat4;Socs3;Il20ra
mmu04630	Jak-STAT signaling pathway	4	Il10rb;Jak2;Stat4;Socs3;Il21r
mmu04630	Jak-STAT signaling pathway	4	Il10rb;Jak2;Stat4;Socs3;Il22ra1
mmu04630	Jak-STAT signaling pathway	4	Il10rb;Jak2;Stat4;Socs3;Il22ra2
mmu04630	Jak-STAT signaling pathway	4	Il10rb;Jak2;Stat4;Socs3;Il28ra
mmu04630	Jak-STAT signaling pathway	4	Il10rb;Jak2;Stat4;Socs3;Il2ra
mmu04630	Jak-STAT signaling pathway	4	Il10rb;Jak2;Stat4;Socs3;Il2rg
mmu04630	Jak-STAT signaling pathway	4	Il10rb;Jak2;Stat4;Socs3;Il3ra
mmu04630	Jak-STAT signaling pathway	4	Il10rb;Jak2;Stat4;Socs3;Il4ra
mmu04630	Jak-STAT signaling pathway	4	Il10rb;Jak2;Stat4;Socs3;Il6ra
mmu04630	Jak-STAT signaling pathway	4	Il10rb;Jak2;Stat4;Socs3;Il7r
mmu04630	Jak-STAT signaling pathway	4	Il10rb;Jak2;Stat4;Socs3;Il9r
mmu04630	Jak-STAT signaling pathway	4	Il10rb;Jak2;Stat4;Socs3;Lifr
mmu04630	Jak-STAT signaling pathway	4	Il10rb;Jak2;Stat5a;Socs4;Il2rb
mmu04630	Jak-STAT signaling pathway	4	Il10rb;Jak2;Stat5a;Socs4;Tyk2
mmu04630	Jak-STAT signaling pathway	4	Stat1;Socs3;Cntfr;Jak2;Pik3cd
mmu04630	Jak-STAT signaling pathway	4	Stat1;Socs3;Cntfr;Jak2;Pik3cg
mmu04630	Jak-STAT signaling pathway	4	Stat1;Socs3;Cntfr;Jak2;Pik3r2
mmu04630	Jak-STAT signaling pathway	4	Stat1;Socs3;Cntfr;Jak2;Pik3r3
mmu04630	Jak-STAT signaling pathway	4	Stat1;Socs3;Cntfr;Jak2;Pik3r5
mmu04630	Jak-STAT signaling pathway	4	Stat1;Socs3;Cntfr;Jak2;Stat4
mmu04630	Jak-STAT signaling pathway	4	Stat1;Socs3;Cntfr;Jak2;Stat6
mmu04630	Jak-STAT signaling pathway	4	Il22ra1;Jak2;Stat4;Socs3;Cntfr
mmu04630	Jak-STAT signaling pathway	4	Il22ra1;Jak2;Stat4;Socs3;CR974586.2
mmu04630	Jak-STAT signaling pathway	4	Il22ra1;Jak2;Stat4;Socs3;Crlf2
mmu04630	Jak-STAT signaling pathway	4	Il22ra1;Jak2;Stat4;Socs3;Csf2rb
mmu04630	Jak-STAT signaling pathway	4	Il22ra1;Jak2;Stat4;Socs3;Csf2rb2
mmu04630	Jak-STAT signaling pathway	4	Il22ra1;Jak2;Stat4;Socs3;CT868723.4
mmu04630	Jak-STAT signaling pathway	4	Il22ra1;Jak2;Stat4;Socs3;Gm13305
mmu04630	Jak-STAT signaling pathway	4	Il22ra1;Jak2;Stat4;Socs3;Gm2002
mmu04630	Jak-STAT signaling pathway	4	Il22ra1;Jak2;Stat4;Socs3;Ifnar1
mmu04630	Jak-STAT signaling pathway	4	Il22ra1;Jak2;Stat4;Socs3;Ifnar2
mmu04630	Jak-STAT signaling pathway	4	Il22ra1;Jak2;Stat4;Socs3;Ifngr1
mmu04630	Jak-STAT signaling pathway	4	Il22ra1;Jak2;Stat4;Socs3;Ifngr2
mmu04630	Jak-STAT signaling pathway	4	Il22ra1;Jak2;Stat4;Socs3;Il10rb
mmu04630	Jak-STAT signaling pathway	4	Il22ra1;Jak2;Stat4;Socs3;Il11ra1
mmu04630	Jak-STAT signaling pathway	4	Il22ra1;Jak2;Stat4;Socs3;Il12rb1
mmu04630	Jak-STAT signaling pathway	4	Il22ra1;Jak2;Stat4;Socs3;Il13ra1
mmu04630	Jak-STAT signaling pathway	4	Il22ra1;Jak2;Stat4;Socs3;Il13ra2
mmu04630	Jak-STAT signaling pathway	4	Il22ra1;Jak2;Stat4;Socs3;Il15ra
mmu04630	Jak-STAT signaling pathway	4	Il22ra1;Jak2;Stat4;Socs3;Il20ra
mmu04630	Jak-STAT signaling pathway	4	Il22ra1;Jak2;Stat4;Socs3;Il21r
mmu04630	Jak-STAT signaling pathway	4	Il22ra1;Jak2;Stat4;Socs3;Il22ra2
mmu04630	Jak-STAT signaling pathway	4	Il22ra1;Jak2;Stat4;Socs3;Il28ra
mmu04630	Jak-STAT signaling pathway	4	Il22ra1;Jak2;Stat4;Socs3;Il2ra
mmu04630	Jak-STAT signaling pathway	4	Il22ra1;Jak2;Stat4;Socs3;Il2rg
mmu04630	Jak-STAT signaling pathway	4	Il22ra1;Jak2;Stat4;Socs3;Il3ra
mmu04630	Jak-STAT signaling pathway	4	Il22ra1;Jak2;Stat4;Socs3;Il4ra
mmu04630	Jak-STAT signaling pathway	4	Il22ra1;Jak2;Stat4;Socs3;Il6ra
mmu04630	Jak-STAT signaling pathway	4	Il22ra1;Jak2;Stat4;Socs3;Il7r
mmu04630	Jak-STAT signaling pathway	4	Il22ra1;Jak2;Stat4;Socs3;Il9r
mmu04630	Jak-STAT signaling pathway	4	Il22ra1;Jak2;Stat4;Socs3;Lifr
mmu04630	Jak-STAT signaling pathway	4	Il22ra1;Jak2;Stat5a;Socs4;Il2rb
mmu04630	Jak-STAT signaling pathway	4	Il22ra1;Jak2;Stat5a;Socs4;Tyk2
mmu04630	Jak-STAT signaling pathway	4	Pias1;Stat5a;Socs2;Jak2;Pik3cd
mmu04630	Jak-STAT signaling pathway	4	Pias1;Stat5a;Socs2;Jak2;Pik3cg
mmu04630	Jak-STAT signaling pathway	4	Pias1;Stat5a;Socs2;Jak2;Pik3r2
mmu04630	Jak-STAT signaling pathway	4	Pias1;Stat5a;Socs2;Jak2;Pik3r3
mmu04630	Jak-STAT signaling pathway	4	Pias1;Stat5a;Socs2;Jak2;Pik3r5
mmu04630	Jak-STAT signaling pathway	4	Pias1;Stat5a;Socs2;Jak2;Stat6
mmu04630	Jak-STAT signaling pathway	4	Il12rb1;Jak2;Stat4;Socs3;Cntfr
mmu04630	Jak-STAT signaling pathway	4	Il12rb1;Jak2;Stat4;Socs3;CR974586.2
mmu04630	Jak-STAT signaling pathway	4	Il12rb1;Jak2;Stat4;Socs3;Crlf2
mmu04630	Jak-STAT signaling pathway	4	Il12rb1;Jak2;Stat4;Socs3;Csf2rb
mmu04630	Jak-STAT signaling pathway	4	Il12rb1;Jak2;Stat4;Socs3;Csf2rb2
mmu04630	Jak-STAT signaling pathway	4	Il12rb1;Jak2;Stat4;Socs3;CT868723.4
mmu04630	Jak-STAT signaling pathway	4	Il12rb1;Jak2;Stat4;Socs3;Gm13305
mmu04630	Jak-STAT signaling pathway	4	Il12rb1;Jak2;Stat4;Socs3;Gm2002
mmu04630	Jak-STAT signaling pathway	4	Il12rb1;Jak2;Stat4;Socs3;Ifnar1
mmu04630	Jak-STAT signaling pathway	4	Il12rb1;Jak2;Stat4;Socs3;Ifnar2
mmu04630	Jak-STAT signaling pathway	4	Il12rb1;Jak2;Stat4;Socs3;Ifngr1
mmu04630	Jak-STAT signaling pathway	4	Il12rb1;Jak2;Stat4;Socs3;Ifngr2
mmu04630	Jak-STAT signaling pathway	4	Il12rb1;Jak2;Stat4;Socs3;Il10rb
mmu04630	Jak-STAT signaling pathway	4	Il12rb1;Jak2;Stat4;Socs3;Il11ra1
mmu04630	Jak-STAT signaling pathway	4	Il12rb1;Jak2;Stat4;Socs3;Il13ra1
mmu04630	Jak-STAT signaling pathway	4	Il12rb1;Jak2;Stat4;Socs3;Il13ra2
mmu04630	Jak-STAT signaling pathway	4	Il12rb1;Jak2;Stat4;Socs3;Il15ra
mmu04630	Jak-STAT signaling pathway	4	Il12rb1;Jak2;Stat4;Socs3;Il20ra
mmu04630	Jak-STAT signaling pathway	4	Il12rb1;Jak2;Stat4;Socs3;Il21r
mmu04630	Jak-STAT signaling pathway	4	Il12rb1;Jak2;Stat4;Socs3;Il22ra1
mmu04630	Jak-STAT signaling pathway	4	Il12rb1;Jak2;Stat4;Socs3;Il22ra2
mmu04630	Jak-STAT signaling pathway	4	Il12rb1;Jak2;Stat4;Socs3;Il28ra
mmu04630	Jak-STAT signaling pathway	4	Il12rb1;Jak2;Stat4;Socs3;Il2ra
mmu04630	Jak-STAT signaling pathway	4	Il12rb1;Jak2;Stat4;Socs3;Il2rg
mmu04630	Jak-STAT signaling pathway	4	Il12rb1;Jak2;Stat4;Socs3;Il3ra
mmu04630	Jak-STAT signaling pathway	4	Il12rb1;Jak2;Stat4;Socs3;Il4ra
mmu04630	Jak-STAT signaling pathway	4	Il12rb1;Jak2;Stat4;Socs3;Il6ra
mmu04630	Jak-STAT signaling pathway	4	Il12rb1;Jak2;Stat4;Socs3;Il7r
mmu04630	Jak-STAT signaling pathway	4	Il12rb1;Jak2;Stat4;Socs3;Il9r
mmu04630	Jak-STAT signaling pathway	4	Il12rb1;Jak2;Stat4;Socs3;Lifr
mmu04630	Jak-STAT signaling pathway	4	Il12rb1;Jak2;Stat5a;Socs4;Il2rb
mmu04630	Jak-STAT signaling pathway	4	Il12rb1;Jak2;Stat5a;Socs4;Tyk2
mmu04630	Jak-STAT signaling pathway	4	Gm13305;Jak2;Stat4;Socs3;Cntfr
mmu04630	Jak-STAT signaling pathway	4	Gm13305;Jak2;Stat4;Socs3;CR974586.2
mmu04630	Jak-STAT signaling pathway	4	Gm13305;Jak2;Stat4;Socs3;Crlf2
mmu04630	Jak-STAT signaling pathway	4	Gm13305;Jak2;Stat4;Socs3;Csf2rb
mmu04630	Jak-STAT signaling pathway	4	Gm13305;Jak2;Stat4;Socs3;Csf2rb2
mmu04630	Jak-STAT signaling pathway	4	Gm13305;Jak2;Stat4;Socs3;CT868723.4
mmu04630	Jak-STAT signaling pathway	4	Gm13305;Jak2;Stat4;Socs3;Gm2002
mmu04630	Jak-STAT signaling pathway	4	Gm13305;Jak2;Stat4;Socs3;Ifnar1
mmu04630	Jak-STAT signaling pathway	4	Gm13305;Jak2;Stat4;Socs3;Ifnar2
mmu04630	Jak-STAT signaling pathway	4	Gm13305;Jak2;Stat4;Socs3;Ifngr1
mmu04630	Jak-STAT signaling pathway	4	Gm13305;Jak2;Stat4;Socs3;Ifngr2
mmu04630	Jak-STAT signaling pathway	4	Gm13305;Jak2;Stat4;Socs3;Il10rb
mmu04630	Jak-STAT signaling pathway	4	Gm13305;Jak2;Stat4;Socs3;Il11ra1
mmu04630	Jak-STAT signaling pathway	4	Gm13305;Jak2;Stat4;Socs3;Il12rb1
mmu04630	Jak-STAT signaling pathway	4	Gm13305;Jak2;Stat4;Socs3;Il13ra1
mmu04630	Jak-STAT signaling pathway	4	Gm13305;Jak2;Stat4;Socs3;Il13ra2
mmu04630	Jak-STAT signaling pathway	4	Gm13305;Jak2;Stat4;Socs3;Il15ra
mmu04630	Jak-STAT signaling pathway	4	Gm13305;Jak2;Stat4;Socs3;Il20ra
mmu04630	Jak-STAT signaling pathway	4	Gm13305;Jak2;Stat4;Socs3;Il21r
mmu04630	Jak-STAT signaling pathway	4	Gm13305;Jak2;Stat4;Socs3;Il22ra1
mmu04630	Jak-STAT signaling pathway	4	Gm13305;Jak2;Stat4;Socs3;Il22ra2
mmu04630	Jak-STAT signaling pathway	4	Gm13305;Jak2;Stat4;Socs3;Il28ra
mmu04630	Jak-STAT signaling pathway	4	Gm13305;Jak2;Stat4;Socs3;Il2ra
mmu04630	Jak-STAT signaling pathway	4	Gm13305;Jak2;Stat4;Socs3;Il2rg
mmu04630	Jak-STAT signaling pathway	4	Gm13305;Jak2;Stat4;Socs3;Il3ra
mmu04630	Jak-STAT signaling pathway	4	Gm13305;Jak2;Stat4;Socs3;Il4ra
mmu04630	Jak-STAT signaling pathway	4	Gm13305;Jak2;Stat4;Socs3;Il6ra
mmu04630	Jak-STAT signaling pathway	4	Gm13305;Jak2;Stat4;Socs3;Il7r
mmu04630	Jak-STAT signaling pathway	4	Gm13305;Jak2;Stat4;Socs3;Il9r
mmu04630	Jak-STAT signaling pathway	4	Gm13305;Jak2;Stat4;Socs3;Lifr
mmu04630	Jak-STAT signaling pathway	4	Gm13305;Jak2;Stat5a;Socs4;Il2rb
mmu04630	Jak-STAT signaling pathway	4	Gm13305;Jak2;Stat5a;Socs4;Tyk2
mmu04630	Jak-STAT signaling pathway	4	Lifr;Jak2;Stat4;Socs3;Cntfr
mmu04630	Jak-STAT signaling pathway	4	Lifr;Jak2;Stat4;Socs3;CR974586.2
mmu04630	Jak-STAT signaling pathway	4	Lifr;Jak2;Stat4;Socs3;Crlf2
mmu04630	Jak-STAT signaling pathway	4	Lifr;Jak2;Stat4;Socs3;Csf2rb
mmu04630	Jak-STAT signaling pathway	4	Lifr;Jak2;Stat4;Socs3;Csf2rb2
mmu04630	Jak-STAT signaling pathway	4	Lifr;Jak2;Stat4;Socs3;CT868723.4
mmu04630	Jak-STAT signaling pathway	4	Lifr;Jak2;Stat4;Socs3;Gm13305
mmu04630	Jak-STAT signaling pathway	4	Lifr;Jak2;Stat4;Socs3;Gm2002
mmu04630	Jak-STAT signaling pathway	4	Lifr;Jak2;Stat4;Socs3;Ifnar1
mmu04630	Jak-STAT signaling pathway	4	Lifr;Jak2;Stat4;Socs3;Ifnar2
mmu04630	Jak-STAT signaling pathway	4	Lifr;Jak2;Stat4;Socs3;Ifngr1
mmu04630	Jak-STAT signaling pathway	4	Lifr;Jak2;Stat4;Socs3;Ifngr2
mmu04630	Jak-STAT signaling pathway	4	Lifr;Jak2;Stat4;Socs3;Il10rb
mmu04630	Jak-STAT signaling pathway	4	Lifr;Jak2;Stat4;Socs3;Il11ra1
mmu04630	Jak-STAT signaling pathway	4	Lifr;Jak2;Stat4;Socs3;Il12rb1
mmu04630	Jak-STAT signaling pathway	4	Lifr;Jak2;Stat4;Socs3;Il13ra1
mmu04630	Jak-STAT signaling pathway	4	Lifr;Jak2;Stat4;Socs3;Il13ra2
mmu04630	Jak-STAT signaling pathway	4	Lifr;Jak2;Stat4;Socs3;Il15ra
mmu04630	Jak-STAT signaling pathway	4	Lifr;Jak2;Stat4;Socs3;Il20ra
mmu04630	Jak-STAT signaling pathway	4	Lifr;Jak2;Stat4;Socs3;Il21r
mmu04630	Jak-STAT signaling pathway	4	Lifr;Jak2;Stat4;Socs3;Il22ra1
mmu04630	Jak-STAT signaling pathway	4	Lifr;Jak2;Stat4;Socs3;Il22ra2
mmu04630	Jak-STAT signaling pathway	4	Lifr;Jak2;Stat4;Socs3;Il28ra
mmu04630	Jak-STAT signaling pathway	4	Lifr;Jak2;Stat4;Socs3;Il2ra
mmu04630	Jak-STAT signaling pathway	4	Lifr;Jak2;Stat4;Socs3;Il2rg
mmu04630	Jak-STAT signaling pathway	4	Lifr;Jak2;Stat4;Socs3;Il3ra
mmu04630	Jak-STAT signaling pathway	4	Lifr;Jak2;Stat4;Socs3;Il4ra
mmu04630	Jak-STAT signaling pathway	4	Lifr;Jak2;Stat4;Socs3;Il6ra
mmu04630	Jak-STAT signaling pathway	4	Lifr;Jak2;Stat4;Socs3;Il7r
mmu04630	Jak-STAT signaling pathway	4	Lifr;Jak2;Stat4;Socs3;Il9r
mmu04630	Jak-STAT signaling pathway	4	Lifr;Jak2;Stat5a;Socs4;Il2rb
mmu04630	Jak-STAT signaling pathway	4	Lifr;Jak2;Stat5a;Socs4;Tyk2
mmu04630	Jak-STAT signaling pathway	4	Cntfr;Jak2;Stat4;Socs3;CR974586.2
mmu04630	Jak-STAT signaling pathway	4	Cntfr;Jak2;Stat4;Socs3;Crlf2
mmu04630	Jak-STAT signaling pathway	4	Cntfr;Jak2;Stat4;Socs3;Csf2rb
mmu04630	Jak-STAT signaling pathway	4	Cntfr;Jak2;Stat4;Socs3;Csf2rb2
mmu04630	Jak-STAT signaling pathway	4	Cntfr;Jak2;Stat4;Socs3;CT868723.4
mmu04630	Jak-STAT signaling pathway	4	Cntfr;Jak2;Stat4;Socs3;Gm13305
mmu04630	Jak-STAT signaling pathway	4	Cntfr;Jak2;Stat4;Socs3;Gm2002
mmu04630	Jak-STAT signaling pathway	4	Cntfr;Jak2;Stat4;Socs3;Ifnar1
mmu04630	Jak-STAT signaling pathway	4	Cntfr;Jak2;Stat4;Socs3;Ifnar2
mmu04630	Jak-STAT signaling pathway	4	Cntfr;Jak2;Stat4;Socs3;Ifngr1
mmu04630	Jak-STAT signaling pathway	4	Cntfr;Jak2;Stat4;Socs3;Ifngr2
mmu04630	Jak-STAT signaling pathway	4	Cntfr;Jak2;Stat4;Socs3;Il10rb
mmu04630	Jak-STAT signaling pathway	4	Cntfr;Jak2;Stat4;Socs3;Il11ra1
mmu04630	Jak-STAT signaling pathway	4	Cntfr;Jak2;Stat4;Socs3;Il12rb1
mmu04630	Jak-STAT signaling pathway	4	Cntfr;Jak2;Stat4;Socs3;Il13ra1
mmu04630	Jak-STAT signaling pathway	4	Cntfr;Jak2;Stat4;Socs3;Il13ra2
mmu04630	Jak-STAT signaling pathway	4	Cntfr;Jak2;Stat4;Socs3;Il15ra
mmu04630	Jak-STAT signaling pathway	4	Cntfr;Jak2;Stat4;Socs3;Il20ra
mmu04630	Jak-STAT signaling pathway	4	Cntfr;Jak2;Stat4;Socs3;Il21r
mmu04630	Jak-STAT signaling pathway	4	Cntfr;Jak2;Stat4;Socs3;Il22ra1
mmu04630	Jak-STAT signaling pathway	4	Cntfr;Jak2;Stat4;Socs3;Il22ra2
mmu04630	Jak-STAT signaling pathway	4	Cntfr;Jak2;Stat4;Socs3;Il28ra
mmu04630	Jak-STAT signaling pathway	4	Cntfr;Jak2;Stat4;Socs3;Il2ra
mmu04630	Jak-STAT signaling pathway	4	Cntfr;Jak2;Stat4;Socs3;Il2rg
mmu04630	Jak-STAT signaling pathway	4	Cntfr;Jak2;Stat4;Socs3;Il3ra
mmu04630	Jak-STAT signaling pathway	4	Cntfr;Jak2;Stat4;Socs3;Il4ra
mmu04630	Jak-STAT signaling pathway	4	Cntfr;Jak2;Stat4;Socs3;Il6ra
mmu04630	Jak-STAT signaling pathway	4	Cntfr;Jak2;Stat4;Socs3;Il7r
mmu04630	Jak-STAT signaling pathway	4	Cntfr;Jak2;Stat4;Socs3;Il9r
mmu04630	Jak-STAT signaling pathway	4	Cntfr;Jak2;Stat4;Socs3;Lifr
mmu04630	Jak-STAT signaling pathway	4	Il7r;Jak2;Stat4;Socs3;Cntfr
mmu04630	Jak-STAT signaling pathway	4	Il7r;Jak2;Stat4;Socs3;CR974586.2
mmu04630	Jak-STAT signaling pathway	4	Il7r;Jak2;Stat4;Socs3;Crlf2
mmu04630	Jak-STAT signaling pathway	4	Il7r;Jak2;Stat4;Socs3;Csf2rb
mmu04630	Jak-STAT signaling pathway	4	Il7r;Jak2;Stat4;Socs3;Csf2rb2
mmu04630	Jak-STAT signaling pathway	4	Il7r;Jak2;Stat4;Socs3;CT868723.4
mmu04630	Jak-STAT signaling pathway	4	Il7r;Jak2;Stat4;Socs3;Gm13305
mmu04630	Jak-STAT signaling pathway	4	Il7r;Jak2;Stat4;Socs3;Gm2002
mmu04630	Jak-STAT signaling pathway	4	Il7r;Jak2;Stat4;Socs3;Ifnar1
mmu04630	Jak-STAT signaling pathway	4	Il7r;Jak2;Stat4;Socs3;Ifnar2
mmu04630	Jak-STAT signaling pathway	4	Il7r;Jak2;Stat4;Socs3;Ifngr1
mmu04630	Jak-STAT signaling pathway	4	Il7r;Jak2;Stat4;Socs3;Ifngr2
mmu04630	Jak-STAT signaling pathway	4	Il7r;Jak2;Stat4;Socs3;Il10rb
mmu04630	Jak-STAT signaling pathway	4	Il7r;Jak2;Stat4;Socs3;Il11ra1
mmu04630	Jak-STAT signaling pathway	4	Il7r;Jak2;Stat4;Socs3;Il12rb1
mmu04630	Jak-STAT signaling pathway	4	Il7r;Jak2;Stat4;Socs3;Il13ra1
mmu04630	Jak-STAT signaling pathway	4	Il7r;Jak2;Stat4;Socs3;Il13ra2
mmu04630	Jak-STAT signaling pathway	4	Il7r;Jak2;Stat4;Socs3;Il15ra
mmu04630	Jak-STAT signaling pathway	4	Il7r;Jak2;Stat4;Socs3;Il20ra
mmu04630	Jak-STAT signaling pathway	4	Il7r;Jak2;Stat4;Socs3;Il21r
mmu04630	Jak-STAT signaling pathway	4	Il7r;Jak2;Stat4;Socs3;Il22ra1
mmu04630	Jak-STAT signaling pathway	4	Il7r;Jak2;Stat4;Socs3;Il22ra2
mmu04630	Jak-STAT signaling pathway	4	Il7r;Jak2;Stat4;Socs3;Il28ra
mmu04630	Jak-STAT signaling pathway	4	Il7r;Jak2;Stat4;Socs3;Il2ra
mmu04630	Jak-STAT signaling pathway	4	Il7r;Jak2;Stat4;Socs3;Il2rg
mmu04630	Jak-STAT signaling pathway	4	Il7r;Jak2;Stat4;Socs3;Il3ra
mmu04630	Jak-STAT signaling pathway	4	Il7r;Jak2;Stat4;Socs3;Il4ra
mmu04630	Jak-STAT signaling pathway	4	Il7r;Jak2;Stat4;Socs3;Il6ra
mmu04630	Jak-STAT signaling pathway	4	Il7r;Jak2;Stat4;Socs3;Il9r
mmu04630	Jak-STAT signaling pathway	4	Il7r;Jak2;Stat4;Socs3;Lifr
mmu04630	Jak-STAT signaling pathway	4	Il7r;Jak2;Stat5a;Socs4;Il2rb
mmu04630	Jak-STAT signaling pathway	4	Il7r;Jak2;Stat5a;Socs4;Tyk2
mmu04630	Jak-STAT signaling pathway	4	Gm2002;Jak2;Stat4;Socs3;Cntfr
mmu04630	Jak-STAT signaling pathway	4	Gm2002;Jak2;Stat4;Socs3;CR974586.2
mmu04630	Jak-STAT signaling pathway	4	Gm2002;Jak2;Stat4;Socs3;Crlf2
mmu04630	Jak-STAT signaling pathway	4	Gm2002;Jak2;Stat4;Socs3;Csf2rb
mmu04630	Jak-STAT signaling pathway	4	Gm2002;Jak2;Stat4;Socs3;Csf2rb2
mmu04630	Jak-STAT signaling pathway	4	Gm2002;Jak2;Stat4;Socs3;CT868723.4
mmu04630	Jak-STAT signaling pathway	4	Gm2002;Jak2;Stat4;Socs3;Gm13305
mmu04630	Jak-STAT signaling pathway	4	Gm2002;Jak2;Stat4;Socs3;Ifnar1
mmu04630	Jak-STAT signaling pathway	4	Gm2002;Jak2;Stat4;Socs3;Ifnar2
mmu04630	Jak-STAT signaling pathway	4	Gm2002;Jak2;Stat4;Socs3;Ifngr1
mmu04630	Jak-STAT signaling pathway	4	Gm2002;Jak2;Stat4;Socs3;Ifngr2
mmu04630	Jak-STAT signaling pathway	4	Gm2002;Jak2;Stat4;Socs3;Il10rb
mmu04630	Jak-STAT signaling pathway	4	Gm2002;Jak2;Stat4;Socs3;Il11ra1
mmu04630	Jak-STAT signaling pathway	4	Gm2002;Jak2;Stat4;Socs3;Il12rb1
mmu04630	Jak-STAT signaling pathway	4	Gm2002;Jak2;Stat4;Socs3;Il13ra1
mmu04630	Jak-STAT signaling pathway	4	Gm2002;Jak2;Stat4;Socs3;Il13ra2
mmu04630	Jak-STAT signaling pathway	4	Gm2002;Jak2;Stat4;Socs3;Il15ra
mmu04630	Jak-STAT signaling pathway	4	Gm2002;Jak2;Stat4;Socs3;Il20ra
mmu04630	Jak-STAT signaling pathway	4	Gm2002;Jak2;Stat4;Socs3;Il21r
mmu04630	Jak-STAT signaling pathway	4	Gm2002;Jak2;Stat4;Socs3;Il22ra1
mmu04630	Jak-STAT signaling pathway	4	Gm2002;Jak2;Stat4;Socs3;Il22ra2
mmu04630	Jak-STAT signaling pathway	4	Gm2002;Jak2;Stat4;Socs3;Il28ra
mmu04630	Jak-STAT signaling pathway	4	Gm2002;Jak2;Stat4;Socs3;Il2ra
mmu04630	Jak-STAT signaling pathway	4	Gm2002;Jak2;Stat4;Socs3;Il2rg
mmu04630	Jak-STAT signaling pathway	4	Gm2002;Jak2;Stat4;Socs3;Il3ra
mmu04630	Jak-STAT signaling pathway	4	Gm2002;Jak2;Stat4;Socs3;Il4ra
mmu04630	Jak-STAT signaling pathway	4	Gm2002;Jak2;Stat4;Socs3;Il6ra
mmu04630	Jak-STAT signaling pathway	4	Gm2002;Jak2;Stat4;Socs3;Il7r
mmu04630	Jak-STAT signaling pathway	4	Gm2002;Jak2;Stat4;Socs3;Il9r
mmu04630	Jak-STAT signaling pathway	4	Gm2002;Jak2;Stat4;Socs3;Lifr
mmu04630	Jak-STAT signaling pathway	4	Gm2002;Jak2;Stat5a;Socs4;Il2rb
mmu04630	Jak-STAT signaling pathway	4	Gm2002;Jak2;Stat5a;Socs4;Tyk2
mmu04630	Jak-STAT signaling pathway	4	Ifnar2;Jak2;Stat4;Socs3;Cntfr
mmu04630	Jak-STAT signaling pathway	4	Ifnar2;Jak2;Stat4;Socs3;CR974586.2
mmu04630	Jak-STAT signaling pathway	4	Ifnar2;Jak2;Stat4;Socs3;Crlf2
mmu04630	Jak-STAT signaling pathway	4	Ifnar2;Jak2;Stat4;Socs3;Csf2rb
mmu04630	Jak-STAT signaling pathway	4	Ifnar2;Jak2;Stat4;Socs3;Csf2rb2
mmu04630	Jak-STAT signaling pathway	4	Ifnar2;Jak2;Stat4;Socs3;CT868723.4
mmu04630	Jak-STAT signaling pathway	4	Ifnar2;Jak2;Stat4;Socs3;Gm13305
mmu04630	Jak-STAT signaling pathway	4	Ifnar2;Jak2;Stat4;Socs3;Gm2002
mmu04630	Jak-STAT signaling pathway	4	Ifnar2;Jak2;Stat4;Socs3;Ifnar1
mmu04630	Jak-STAT signaling pathway	4	Ifnar2;Jak2;Stat4;Socs3;Ifngr1
mmu04630	Jak-STAT signaling pathway	4	Ifnar2;Jak2;Stat4;Socs3;Ifngr2
mmu04630	Jak-STAT signaling pathway	4	Ifnar2;Jak2;Stat4;Socs3;Il10rb
mmu04630	Jak-STAT signaling pathway	4	Ifnar2;Jak2;Stat4;Socs3;Il11ra1
mmu04630	Jak-STAT signaling pathway	4	Ifnar2;Jak2;Stat4;Socs3;Il12rb1
mmu04630	Jak-STAT signaling pathway	4	Ifnar2;Jak2;Stat4;Socs3;Il13ra1
mmu04630	Jak-STAT signaling pathway	4	Ifnar2;Jak2;Stat4;Socs3;Il13ra2
mmu04630	Jak-STAT signaling pathway	4	Ifnar2;Jak2;Stat4;Socs3;Il15ra
mmu04630	Jak-STAT signaling pathway	4	Ifnar2;Jak2;Stat4;Socs3;Il20ra
mmu04630	Jak-STAT signaling pathway	4	Ifnar2;Jak2;Stat4;Socs3;Il21r
mmu04630	Jak-STAT signaling pathway	4	Ifnar2;Jak2;Stat4;Socs3;Il22ra1
mmu04630	Jak-STAT signaling pathway	4	Ifnar2;Jak2;Stat4;Socs3;Il22ra2
mmu04630	Jak-STAT signaling pathway	4	Ifnar2;Jak2;Stat4;Socs3;Il28ra
mmu04630	Jak-STAT signaling pathway	4	Ifnar2;Jak2;Stat4;Socs3;Il2ra
mmu04630	Jak-STAT signaling pathway	4	Ifnar2;Jak2;Stat4;Socs3;Il2rg
mmu04630	Jak-STAT signaling pathway	4	Ifnar2;Jak2;Stat4;Socs3;Il3ra
mmu04630	Jak-STAT signaling pathway	4	Ifnar2;Jak2;Stat4;Socs3;Il4ra
mmu04630	Jak-STAT signaling pathway	4	Ifnar2;Jak2;Stat4;Socs3;Il6ra
mmu04630	Jak-STAT signaling pathway	4	Ifnar2;Jak2;Stat4;Socs3;Il7r
mmu04630	Jak-STAT signaling pathway	4	Ifnar2;Jak2;Stat4;Socs3;Il9r
mmu04630	Jak-STAT signaling pathway	4	Ifnar2;Jak2;Stat4;Socs3;Lifr
mmu04630	Jak-STAT signaling pathway	4	Ifnar2;Jak2;Stat5a;Socs4;Il2rb
mmu04630	Jak-STAT signaling pathway	4	Ifnar2;Jak2;Stat5a;Socs4;Tyk2
mmu04630	Jak-STAT signaling pathway	4	Pias4;Stat5a;Socs2;Jak2;Pik3cd
mmu04630	Jak-STAT signaling pathway	4	Pias4;Stat5a;Socs2;Jak2;Pik3cg
mmu04630	Jak-STAT signaling pathway	4	Pias4;Stat5a;Socs2;Jak2;Pik3r2
mmu04630	Jak-STAT signaling pathway	4	Pias4;Stat5a;Socs2;Jak2;Pik3r3
mmu04630	Jak-STAT signaling pathway	4	Pias4;Stat5a;Socs2;Jak2;Pik3r5
mmu04630	Jak-STAT signaling pathway	4	Pias4;Stat5a;Socs2;Jak2;Stat6
mmu04630	Jak-STAT signaling pathway	4	CT868723.4;Jak2;Stat4;Socs3;Cntfr
mmu04630	Jak-STAT signaling pathway	4	CT868723.4;Jak2;Stat4;Socs3;CR974586.2
mmu04630	Jak-STAT signaling pathway	4	CT868723.4;Jak2;Stat4;Socs3;Crlf2
mmu04630	Jak-STAT signaling pathway	4	CT868723.4;Jak2;Stat4;Socs3;Csf2rb
mmu04630	Jak-STAT signaling pathway	4	CT868723.4;Jak2;Stat4;Socs3;Csf2rb2
mmu04630	Jak-STAT signaling pathway	4	CT868723.4;Jak2;Stat4;Socs3;Gm13305
mmu04630	Jak-STAT signaling pathway	4	CT868723.4;Jak2;Stat4;Socs3;Gm2002
mmu04630	Jak-STAT signaling pathway	4	CT868723.4;Jak2;Stat4;Socs3;Ifnar1
mmu04630	Jak-STAT signaling pathway	4	CT868723.4;Jak2;Stat4;Socs3;Ifnar2
mmu04630	Jak-STAT signaling pathway	4	CT868723.4;Jak2;Stat4;Socs3;Ifngr1
mmu04630	Jak-STAT signaling pathway	4	CT868723.4;Jak2;Stat4;Socs3;Ifngr2
mmu04630	Jak-STAT signaling pathway	4	CT868723.4;Jak2;Stat4;Socs3;Il10rb
mmu04630	Jak-STAT signaling pathway	4	CT868723.4;Jak2;Stat4;Socs3;Il11ra1
mmu04630	Jak-STAT signaling pathway	4	CT868723.4;Jak2;Stat4;Socs3;Il12rb1
mmu04630	Jak-STAT signaling pathway	4	CT868723.4;Jak2;Stat4;Socs3;Il13ra1
mmu04630	Jak-STAT signaling pathway	4	CT868723.4;Jak2;Stat4;Socs3;Il13ra2
mmu04630	Jak-STAT signaling pathway	4	CT868723.4;Jak2;Stat4;Socs3;Il15ra
mmu04630	Jak-STAT signaling pathway	4	CT868723.4;Jak2;Stat4;Socs3;Il20ra
mmu04630	Jak-STAT signaling pathway	4	CT868723.4;Jak2;Stat4;Socs3;Il21r
mmu04630	Jak-STAT signaling pathway	4	CT868723.4;Jak2;Stat4;Socs3;Il22ra1
mmu04630	Jak-STAT signaling pathway	4	CT868723.4;Jak2;Stat4;Socs3;Il22ra2
mmu04630	Jak-STAT signaling pathway	4	CT868723.4;Jak2;Stat4;Socs3;Il28ra
mmu04630	Jak-STAT signaling pathway	4	CT868723.4;Jak2;Stat4;Socs3;Il2ra
mmu04630	Jak-STAT signaling pathway	4	CT868723.4;Jak2;Stat4;Socs3;Il2rg
mmu04630	Jak-STAT signaling pathway	4	CT868723.4;Jak2;Stat4;Socs3;Il3ra
mmu04630	Jak-STAT signaling pathway	4	CT868723.4;Jak2;Stat4;Socs3;Il4ra
mmu04630	Jak-STAT signaling pathway	4	CT868723.4;Jak2;Stat4;Socs3;Il6ra
mmu04630	Jak-STAT signaling pathway	4	CT868723.4;Jak2;Stat4;Socs3;Il7r
mmu04630	Jak-STAT signaling pathway	4	CT868723.4;Jak2;Stat4;Socs3;Il9r
mmu04630	Jak-STAT signaling pathway	4	CT868723.4;Jak2;Stat4;Socs3;Lifr
mmu04630	Jak-STAT signaling pathway	4	CT868723.4;Jak2;Stat5a;Socs4;Il2rb
mmu04630	Jak-STAT signaling pathway	4	CT868723.4;Jak2;Stat5a;Socs4;Tyk2
mmu04630	Jak-STAT signaling pathway	4	Il15ra;Jak2;Stat4;Socs3;Cntfr
mmu04630	Jak-STAT signaling pathway	4	Il15ra;Jak2;Stat4;Socs3;CR974586.2
mmu04630	Jak-STAT signaling pathway	4	Il15ra;Jak2;Stat4;Socs3;Crlf2
mmu04630	Jak-STAT signaling pathway	4	Il15ra;Jak2;Stat4;Socs3;Csf2rb
mmu04630	Jak-STAT signaling pathway	4	Il15ra;Jak2;Stat4;Socs3;Csf2rb2
mmu04630	Jak-STAT signaling pathway	4	Il15ra;Jak2;Stat4;Socs3;CT868723.4
mmu04630	Jak-STAT signaling pathway	4	Il15ra;Jak2;Stat4;Socs3;Gm13305
mmu04630	Jak-STAT signaling pathway	4	Il15ra;Jak2;Stat4;Socs3;Gm2002
mmu04630	Jak-STAT signaling pathway	4	Il15ra;Jak2;Stat4;Socs3;Ifnar1
mmu04630	Jak-STAT signaling pathway	4	Il15ra;Jak2;Stat4;Socs3;Ifnar2
mmu04630	Jak-STAT signaling pathway	4	Il15ra;Jak2;Stat4;Socs3;Ifngr1
mmu04630	Jak-STAT signaling pathway	4	Il15ra;Jak2;Stat4;Socs3;Ifngr2
mmu04630	Jak-STAT signaling pathway	4	Il15ra;Jak2;Stat4;Socs3;Il10rb
mmu04630	Jak-STAT signaling pathway	4	Il15ra;Jak2;Stat4;Socs3;Il11ra1
mmu04630	Jak-STAT signaling pathway	4	Il15ra;Jak2;Stat4;Socs3;Il12rb1
mmu04630	Jak-STAT signaling pathway	4	Il15ra;Jak2;Stat4;Socs3;Il13ra1
mmu04630	Jak-STAT signaling pathway	4	Il15ra;Jak2;Stat4;Socs3;Il13ra2
mmu04630	Jak-STAT signaling pathway	4	Il15ra;Jak2;Stat4;Socs3;Il20ra
mmu04630	Jak-STAT signaling pathway	4	Il15ra;Jak2;Stat4;Socs3;Il21r
mmu04630	Jak-STAT signaling pathway	4	Il15ra;Jak2;Stat4;Socs3;Il22ra1
mmu04630	Jak-STAT signaling pathway	4	Il15ra;Jak2;Stat4;Socs3;Il22ra2
mmu04630	Jak-STAT signaling pathway	4	Il15ra;Jak2;Stat4;Socs3;Il28ra
mmu04630	Jak-STAT signaling pathway	4	Il15ra;Jak2;Stat4;Socs3;Il2ra
mmu04630	Jak-STAT signaling pathway	4	Il15ra;Jak2;Stat4;Socs3;Il2rg
mmu04630	Jak-STAT signaling pathway	4	Il15ra;Jak2;Stat4;Socs3;Il3ra
mmu04630	Jak-STAT signaling pathway	4	Il15ra;Jak2;Stat4;Socs3;Il4ra
mmu04630	Jak-STAT signaling pathway	4	Il15ra;Jak2;Stat4;Socs3;Il6ra
mmu04630	Jak-STAT signaling pathway	4	Il15ra;Jak2;Stat4;Socs3;Il7r
mmu04630	Jak-STAT signaling pathway	4	Il15ra;Jak2;Stat4;Socs3;Il9r
mmu04630	Jak-STAT signaling pathway	4	Il15ra;Jak2;Stat4;Socs3;Lifr
mmu04630	Jak-STAT signaling pathway	4	Il15ra;Jak2;Stat5a;Socs4;Il2rb
mmu04630	Jak-STAT signaling pathway	4	Il15ra;Jak2;Stat5a;Socs4;Tyk2
mmu04630	Jak-STAT signaling pathway	4	Il20ra;Jak2;Stat4;Socs3;Cntfr
mmu04630	Jak-STAT signaling pathway	4	Il20ra;Jak2;Stat4;Socs3;CR974586.2
mmu04630	Jak-STAT signaling pathway	4	Il20ra;Jak2;Stat4;Socs3;Crlf2
mmu04630	Jak-STAT signaling pathway	4	Il20ra;Jak2;Stat4;Socs3;Csf2rb
mmu04630	Jak-STAT signaling pathway	4	Il20ra;Jak2;Stat4;Socs3;Csf2rb2
mmu04630	Jak-STAT signaling pathway	4	Il20ra;Jak2;Stat4;Socs3;CT868723.4
mmu04630	Jak-STAT signaling pathway	4	Il20ra;Jak2;Stat4;Socs3;Gm13305
mmu04630	Jak-STAT signaling pathway	4	Il20ra;Jak2;Stat4;Socs3;Gm2002
mmu04630	Jak-STAT signaling pathway	4	Il20ra;Jak2;Stat4;Socs3;Ifnar1
mmu04630	Jak-STAT signaling pathway	4	Il20ra;Jak2;Stat4;Socs3;Ifnar2
mmu04630	Jak-STAT signaling pathway	4	Il20ra;Jak2;Stat4;Socs3;Ifngr1
mmu04630	Jak-STAT signaling pathway	4	Il20ra;Jak2;Stat4;Socs3;Ifngr2
mmu04630	Jak-STAT signaling pathway	4	Il20ra;Jak2;Stat4;Socs3;Il10rb
mmu04630	Jak-STAT signaling pathway	4	Il20ra;Jak2;Stat4;Socs3;Il11ra1
mmu04630	Jak-STAT signaling pathway	4	Il20ra;Jak2;Stat4;Socs3;Il12rb1
mmu04630	Jak-STAT signaling pathway	4	Il20ra;Jak2;Stat4;Socs3;Il13ra1
mmu04630	Jak-STAT signaling pathway	4	Il20ra;Jak2;Stat4;Socs3;Il13ra2
mmu04630	Jak-STAT signaling pathway	4	Il20ra;Jak2;Stat4;Socs3;Il15ra
mmu04630	Jak-STAT signaling pathway	4	Il20ra;Jak2;Stat4;Socs3;Il21r
mmu04630	Jak-STAT signaling pathway	4	Il20ra;Jak2;Stat4;Socs3;Il22ra1
mmu04630	Jak-STAT signaling pathway	4	Il20ra;Jak2;Stat4;Socs3;Il22ra2
mmu04630	Jak-STAT signaling pathway	4	Il20ra;Jak2;Stat4;Socs3;Il28ra
mmu04630	Jak-STAT signaling pathway	4	Il20ra;Jak2;Stat4;Socs3;Il2ra
mmu04630	Jak-STAT signaling pathway	4	Il20ra;Jak2;Stat4;Socs3;Il2rg
mmu04630	Jak-STAT signaling pathway	4	Il20ra;Jak2;Stat4;Socs3;Il3ra
mmu04630	Jak-STAT signaling pathway	4	Il20ra;Jak2;Stat4;Socs3;Il4ra
mmu04630	Jak-STAT signaling pathway	4	Il20ra;Jak2;Stat4;Socs3;Il6ra
mmu04630	Jak-STAT signaling pathway	4	Il20ra;Jak2;Stat4;Socs3;Il7r
mmu04630	Jak-STAT signaling pathway	4	Il20ra;Jak2;Stat4;Socs3;Il9r
mmu04630	Jak-STAT signaling pathway	4	Il20ra;Jak2;Stat4;Socs3;Lifr
mmu04630	Jak-STAT signaling pathway	4	Il20ra;Jak2;Stat5a;Socs4;Il2rb
mmu04630	Jak-STAT signaling pathway	4	Il20ra;Jak2;Stat5a;Socs4;Tyk2
mmu04630	Jak-STAT signaling pathway	4	Il2ra;Jak2;Stat4;Socs3;Cntfr
mmu04630	Jak-STAT signaling pathway	4	Il2ra;Jak2;Stat4;Socs3;CR974586.2
mmu04630	Jak-STAT signaling pathway	4	Il2ra;Jak2;Stat4;Socs3;Crlf2
mmu04630	Jak-STAT signaling pathway	4	Il2ra;Jak2;Stat4;Socs3;Csf2rb
mmu04630	Jak-STAT signaling pathway	4	Il2ra;Jak2;Stat4;Socs3;Csf2rb2
mmu04630	Jak-STAT signaling pathway	4	Il2ra;Jak2;Stat4;Socs3;CT868723.4
mmu04630	Jak-STAT signaling pathway	4	Il2ra;Jak2;Stat4;Socs3;Gm13305
mmu04630	Jak-STAT signaling pathway	4	Il2ra;Jak2;Stat4;Socs3;Gm2002
mmu04630	Jak-STAT signaling pathway	4	Il2ra;Jak2;Stat4;Socs3;Ifnar1
mmu04630	Jak-STAT signaling pathway	4	Il2ra;Jak2;Stat4;Socs3;Ifnar2
mmu04630	Jak-STAT signaling pathway	4	Il2ra;Jak2;Stat4;Socs3;Ifngr1
mmu04630	Jak-STAT signaling pathway	4	Il2ra;Jak2;Stat4;Socs3;Ifngr2
mmu04630	Jak-STAT signaling pathway	4	Il2ra;Jak2;Stat4;Socs3;Il10rb
mmu04630	Jak-STAT signaling pathway	4	Il2ra;Jak2;Stat4;Socs3;Il11ra1
mmu04630	Jak-STAT signaling pathway	4	Il2ra;Jak2;Stat4;Socs3;Il12rb1
mmu04630	Jak-STAT signaling pathway	4	Il2ra;Jak2;Stat4;Socs3;Il13ra1
mmu04630	Jak-STAT signaling pathway	4	Il2ra;Jak2;Stat4;Socs3;Il13ra2
mmu04630	Jak-STAT signaling pathway	4	Il2ra;Jak2;Stat4;Socs3;Il15ra
mmu04630	Jak-STAT signaling pathway	4	Il2ra;Jak2;Stat4;Socs3;Il20ra
mmu04630	Jak-STAT signaling pathway	4	Il2ra;Jak2;Stat4;Socs3;Il21r
mmu04630	Jak-STAT signaling pathway	4	Il2ra;Jak2;Stat4;Socs3;Il22ra1
mmu04630	Jak-STAT signaling pathway	4	Il2ra;Jak2;Stat4;Socs3;Il22ra2
mmu04630	Jak-STAT signaling pathway	4	Il2ra;Jak2;Stat4;Socs3;Il28ra
mmu04630	Jak-STAT signaling pathway	4	Il2ra;Jak2;Stat4;Socs3;Il2rg
mmu04630	Jak-STAT signaling pathway	4	Il2ra;Jak2;Stat4;Socs3;Il3ra
mmu04630	Jak-STAT signaling pathway	4	Il2ra;Jak2;Stat4;Socs3;Il4ra
mmu04630	Jak-STAT signaling pathway	4	Il2ra;Jak2;Stat4;Socs3;Il6ra
mmu04630	Jak-STAT signaling pathway	4	Il2ra;Jak2;Stat4;Socs3;Il7r
mmu04630	Jak-STAT signaling pathway	4	Il2ra;Jak2;Stat4;Socs3;Il9r
mmu04630	Jak-STAT signaling pathway	4	Il2ra;Jak2;Stat4;Socs3;Lifr
mmu04630	Jak-STAT signaling pathway	4	Il2ra;Jak2;Stat5a;Socs4;Il2rb
mmu04630	Jak-STAT signaling pathway	4	Il2ra;Jak2;Stat5a;Socs4;Tyk2
mmu04630	Jak-STAT signaling pathway	4	Il13ra2;Jak2;Stat4;Socs3;Cntfr
mmu04630	Jak-STAT signaling pathway	4	Il13ra2;Jak2;Stat4;Socs3;CR974586.2
mmu04630	Jak-STAT signaling pathway	4	Il13ra2;Jak2;Stat4;Socs3;Crlf2
mmu04630	Jak-STAT signaling pathway	4	Il13ra2;Jak2;Stat4;Socs3;Csf2rb
mmu04630	Jak-STAT signaling pathway	4	Il13ra2;Jak2;Stat4;Socs3;Csf2rb2
mmu04630	Jak-STAT signaling pathway	4	Il13ra2;Jak2;Stat4;Socs3;CT868723.4
mmu04630	Jak-STAT signaling pathway	4	Il13ra2;Jak2;Stat4;Socs3;Gm13305
mmu04630	Jak-STAT signaling pathway	4	Il13ra2;Jak2;Stat4;Socs3;Gm2002
mmu04630	Jak-STAT signaling pathway	4	Il13ra2;Jak2;Stat4;Socs3;Ifnar1
mmu04630	Jak-STAT signaling pathway	4	Il13ra2;Jak2;Stat4;Socs3;Ifnar2
mmu04630	Jak-STAT signaling pathway	4	Il13ra2;Jak2;Stat4;Socs3;Ifngr1
mmu04630	Jak-STAT signaling pathway	4	Il13ra2;Jak2;Stat4;Socs3;Ifngr2
mmu04630	Jak-STAT signaling pathway	4	Il13ra2;Jak2;Stat4;Socs3;Il10rb
mmu04630	Jak-STAT signaling pathway	4	Il13ra2;Jak2;Stat4;Socs3;Il11ra1
mmu04630	Jak-STAT signaling pathway	4	Il13ra2;Jak2;Stat4;Socs3;Il12rb1
mmu04630	Jak-STAT signaling pathway	4	Il13ra2;Jak2;Stat4;Socs3;Il13ra1
mmu04630	Jak-STAT signaling pathway	4	Il13ra2;Jak2;Stat4;Socs3;Il15ra
mmu04630	Jak-STAT signaling pathway	4	Il13ra2;Jak2;Stat4;Socs3;Il20ra
mmu04630	Jak-STAT signaling pathway	4	Il13ra2;Jak2;Stat4;Socs3;Il21r
mmu04630	Jak-STAT signaling pathway	4	Il13ra2;Jak2;Stat4;Socs3;Il22ra1
mmu04630	Jak-STAT signaling pathway	4	Il13ra2;Jak2;Stat4;Socs3;Il22ra2
mmu04630	Jak-STAT signaling pathway	4	Il13ra2;Jak2;Stat4;Socs3;Il28ra
mmu04630	Jak-STAT signaling pathway	4	Il13ra2;Jak2;Stat4;Socs3;Il2ra
mmu04630	Jak-STAT signaling pathway	4	Il13ra2;Jak2;Stat4;Socs3;Il2rg
mmu04630	Jak-STAT signaling pathway	4	Il13ra2;Jak2;Stat4;Socs3;Il3ra
mmu04630	Jak-STAT signaling pathway	4	Il13ra2;Jak2;Stat4;Socs3;Il4ra
mmu04630	Jak-STAT signaling pathway	4	Il13ra2;Jak2;Stat4;Socs3;Il6ra
mmu04630	Jak-STAT signaling pathway	4	Il13ra2;Jak2;Stat4;Socs3;Il7r
mmu04630	Jak-STAT signaling pathway	4	Il13ra2;Jak2;Stat4;Socs3;Il9r
mmu04630	Jak-STAT signaling pathway	4	Il13ra2;Jak2;Stat4;Socs3;Lifr
mmu04630	Jak-STAT signaling pathway	4	Il13ra2;Jak2;Stat5a;Socs4;Il2rb
mmu04630	Jak-STAT signaling pathway	4	Il13ra2;Jak2;Stat5a;Socs4;Tyk2
mmu04630	Jak-STAT signaling pathway	4	CR974586.2;Jak2;Stat4;Socs3;Cntfr
mmu04630	Jak-STAT signaling pathway	4	CR974586.2;Jak2;Stat4;Socs3;Crlf2
mmu04630	Jak-STAT signaling pathway	4	CR974586.2;Jak2;Stat4;Socs3;Csf2rb
mmu04630	Jak-STAT signaling pathway	4	CR974586.2;Jak2;Stat4;Socs3;Csf2rb2
mmu04630	Jak-STAT signaling pathway	4	CR974586.2;Jak2;Stat4;Socs3;CT868723.4
mmu04630	Jak-STAT signaling pathway	4	CR974586.2;Jak2;Stat4;Socs3;Gm13305
mmu04630	Jak-STAT signaling pathway	4	CR974586.2;Jak2;Stat4;Socs3;Gm2002
mmu04630	Jak-STAT signaling pathway	4	CR974586.2;Jak2;Stat4;Socs3;Ifnar1
mmu04630	Jak-STAT signaling pathway	4	CR974586.2;Jak2;Stat4;Socs3;Ifnar2
mmu04630	Jak-STAT signaling pathway	4	CR974586.2;Jak2;Stat4;Socs3;Ifngr1
mmu04630	Jak-STAT signaling pathway	4	CR974586.2;Jak2;Stat4;Socs3;Ifngr2
mmu04630	Jak-STAT signaling pathway	4	CR974586.2;Jak2;Stat4;Socs3;Il10rb
mmu04630	Jak-STAT signaling pathway	4	CR974586.2;Jak2;Stat4;Socs3;Il11ra1
mmu04630	Jak-STAT signaling pathway	4	CR974586.2;Jak2;Stat4;Socs3;Il12rb1
mmu04630	Jak-STAT signaling pathway	4	CR974586.2;Jak2;Stat4;Socs3;Il13ra1
mmu04630	Jak-STAT signaling pathway	4	CR974586.2;Jak2;Stat4;Socs3;Il13ra2
mmu04630	Jak-STAT signaling pathway	4	CR974586.2;Jak2;Stat4;Socs3;Il15ra
mmu04630	Jak-STAT signaling pathway	4	CR974586.2;Jak2;Stat4;Socs3;Il20ra
mmu04630	Jak-STAT signaling pathway	4	CR974586.2;Jak2;Stat4;Socs3;Il21r
mmu04630	Jak-STAT signaling pathway	4	CR974586.2;Jak2;Stat4;Socs3;Il22ra1
mmu04630	Jak-STAT signaling pathway	4	CR974586.2;Jak2;Stat4;Socs3;Il22ra2
mmu04630	Jak-STAT signaling pathway	4	CR974586.2;Jak2;Stat4;Socs3;Il28ra
mmu04630	Jak-STAT signaling pathway	4	CR974586.2;Jak2;Stat4;Socs3;Il2ra
mmu04630	Jak-STAT signaling pathway	4	CR974586.2;Jak2;Stat4;Socs3;Il2rg
mmu04630	Jak-STAT signaling pathway	4	CR974586.2;Jak2;Stat4;Socs3;Il3ra
mmu04630	Jak-STAT signaling pathway	4	CR974586.2;Jak2;Stat4;Socs3;Il4ra
mmu04630	Jak-STAT signaling pathway	4	CR974586.2;Jak2;Stat4;Socs3;Il6ra
mmu04630	Jak-STAT signaling pathway	4	CR974586.2;Jak2;Stat4;Socs3;Il7r
mmu04630	Jak-STAT signaling pathway	4	CR974586.2;Jak2;Stat4;Socs3;Il9r
mmu04630	Jak-STAT signaling pathway	4	CR974586.2;Jak2;Stat4;Socs3;Lifr
mmu04630	Jak-STAT signaling pathway	4	CR974586.2;Jak2;Stat5a;Socs4;Il2rb
mmu04630	Jak-STAT signaling pathway	4	CR974586.2;Jak2;Stat5a;Socs4;Tyk2
mmu04630	Jak-STAT signaling pathway	4	Il22ra2;Jak2;Stat4;Socs3;Cntfr
mmu04630	Jak-STAT signaling pathway	4	Il22ra2;Jak2;Stat4;Socs3;CR974586.2
mmu04630	Jak-STAT signaling pathway	4	Il22ra2;Jak2;Stat4;Socs3;Crlf2
mmu04630	Jak-STAT signaling pathway	4	Il22ra2;Jak2;Stat4;Socs3;Csf2rb
mmu04630	Jak-STAT signaling pathway	4	Il22ra2;Jak2;Stat4;Socs3;Csf2rb2
mmu04630	Jak-STAT signaling pathway	4	Il22ra2;Jak2;Stat4;Socs3;CT868723.4
mmu04630	Jak-STAT signaling pathway	4	Il22ra2;Jak2;Stat4;Socs3;Gm13305
mmu04630	Jak-STAT signaling pathway	4	Il22ra2;Jak2;Stat4;Socs3;Gm2002
mmu04630	Jak-STAT signaling pathway	4	Il22ra2;Jak2;Stat4;Socs3;Ifnar1
mmu04630	Jak-STAT signaling pathway	4	Il22ra2;Jak2;Stat4;Socs3;Ifnar2
mmu04630	Jak-STAT signaling pathway	4	Il22ra2;Jak2;Stat4;Socs3;Ifngr1
mmu04630	Jak-STAT signaling pathway	4	Il22ra2;Jak2;Stat4;Socs3;Ifngr2
mmu04630	Jak-STAT signaling pathway	4	Il22ra2;Jak2;Stat4;Socs3;Il10rb
mmu04630	Jak-STAT signaling pathway	4	Il22ra2;Jak2;Stat4;Socs3;Il11ra1
mmu04630	Jak-STAT signaling pathway	4	Il22ra2;Jak2;Stat4;Socs3;Il12rb1
mmu04630	Jak-STAT signaling pathway	4	Il22ra2;Jak2;Stat4;Socs3;Il13ra1
mmu04630	Jak-STAT signaling pathway	4	Il22ra2;Jak2;Stat4;Socs3;Il13ra2
mmu04630	Jak-STAT signaling pathway	4	Il22ra2;Jak2;Stat4;Socs3;Il15ra
mmu04630	Jak-STAT signaling pathway	4	Il22ra2;Jak2;Stat4;Socs3;Il20ra
mmu04630	Jak-STAT signaling pathway	4	Il22ra2;Jak2;Stat4;Socs3;Il21r
mmu04630	Jak-STAT signaling pathway	4	Il22ra2;Jak2;Stat4;Socs3;Il22ra1
mmu04630	Jak-STAT signaling pathway	4	Il22ra2;Jak2;Stat4;Socs3;Il28ra
mmu04630	Jak-STAT signaling pathway	4	Il22ra2;Jak2;Stat4;Socs3;Il2ra
mmu04630	Jak-STAT signaling pathway	4	Il22ra2;Jak2;Stat4;Socs3;Il2rg
mmu04630	Jak-STAT signaling pathway	4	Il22ra2;Jak2;Stat4;Socs3;Il3ra
mmu04630	Jak-STAT signaling pathway	4	Il22ra2;Jak2;Stat4;Socs3;Il4ra
mmu04630	Jak-STAT signaling pathway	4	Il22ra2;Jak2;Stat4;Socs3;Il6ra
mmu04630	Jak-STAT signaling pathway	4	Il22ra2;Jak2;Stat4;Socs3;Il7r
mmu04630	Jak-STAT signaling pathway	4	Il22ra2;Jak2;Stat4;Socs3;Il9r
mmu04630	Jak-STAT signaling pathway	4	Il22ra2;Jak2;Stat4;Socs3;Lifr
mmu04630	Jak-STAT signaling pathway	4	Il22ra2;Jak2;Stat5a;Socs4;Il2rb
mmu04630	Jak-STAT signaling pathway	4	Il22ra2;Jak2;Stat5a;Socs4;Tyk2
mmu04630	Jak-STAT signaling pathway	4	Il11ra1;Jak2;Stat4;Socs3;Cntfr
mmu04630	Jak-STAT signaling pathway	4	Il11ra1;Jak2;Stat4;Socs3;CR974586.2
mmu04630	Jak-STAT signaling pathway	4	Il11ra1;Jak2;Stat4;Socs3;Crlf2
mmu04630	Jak-STAT signaling pathway	4	Il11ra1;Jak2;Stat4;Socs3;Csf2rb
mmu04630	Jak-STAT signaling pathway	4	Il11ra1;Jak2;Stat4;Socs3;Csf2rb2
mmu04630	Jak-STAT signaling pathway	4	Il11ra1;Jak2;Stat4;Socs3;CT868723.4
mmu04630	Jak-STAT signaling pathway	4	Il11ra1;Jak2;Stat4;Socs3;Gm13305
mmu04630	Jak-STAT signaling pathway	4	Il11ra1;Jak2;Stat4;Socs3;Gm2002
mmu04630	Jak-STAT signaling pathway	4	Il11ra1;Jak2;Stat4;Socs3;Ifnar1
mmu04630	Jak-STAT signaling pathway	4	Il11ra1;Jak2;Stat4;Socs3;Ifnar2
mmu04630	Jak-STAT signaling pathway	4	Il11ra1;Jak2;Stat4;Socs3;Ifngr1
mmu04630	Jak-STAT signaling pathway	4	Il11ra1;Jak2;Stat4;Socs3;Ifngr2
mmu04630	Jak-STAT signaling pathway	4	Il11ra1;Jak2;Stat4;Socs3;Il10rb
mmu04630	Jak-STAT signaling pathway	4	Il11ra1;Jak2;Stat4;Socs3;Il12rb1
mmu04630	Jak-STAT signaling pathway	4	Il11ra1;Jak2;Stat4;Socs3;Il13ra1
mmu04630	Jak-STAT signaling pathway	4	Il11ra1;Jak2;Stat4;Socs3;Il13ra2
mmu04630	Jak-STAT signaling pathway	4	Il11ra1;Jak2;Stat4;Socs3;Il15ra
mmu04630	Jak-STAT signaling pathway	4	Il11ra1;Jak2;Stat4;Socs3;Il20ra
mmu04630	Jak-STAT signaling pathway	4	Il11ra1;Jak2;Stat4;Socs3;Il21r
mmu04630	Jak-STAT signaling pathway	4	Il11ra1;Jak2;Stat4;Socs3;Il22ra1
mmu04630	Jak-STAT signaling pathway	4	Il11ra1;Jak2;Stat4;Socs3;Il22ra2
mmu04630	Jak-STAT signaling pathway	4	Il11ra1;Jak2;Stat4;Socs3;Il28ra
mmu04630	Jak-STAT signaling pathway	4	Il11ra1;Jak2;Stat4;Socs3;Il2ra
mmu04630	Jak-STAT signaling pathway	4	Il11ra1;Jak2;Stat4;Socs3;Il2rg
mmu04630	Jak-STAT signaling pathway	4	Il11ra1;Jak2;Stat4;Socs3;Il3ra
mmu04630	Jak-STAT signaling pathway	4	Il11ra1;Jak2;Stat4;Socs3;Il4ra
mmu04630	Jak-STAT signaling pathway	4	Il11ra1;Jak2;Stat4;Socs3;Il6ra
mmu04630	Jak-STAT signaling pathway	4	Il11ra1;Jak2;Stat4;Socs3;Il7r
mmu04630	Jak-STAT signaling pathway	4	Il11ra1;Jak2;Stat4;Socs3;Il9r
mmu04630	Jak-STAT signaling pathway	4	Il11ra1;Jak2;Stat4;Socs3;Lifr
mmu04630	Jak-STAT signaling pathway	4	Il11ra1;Jak2;Stat5a;Socs4;Il2rb
mmu04630	Jak-STAT signaling pathway	4	Il11ra1;Jak2;Stat5a;Socs4;Tyk2
mmu04630	Jak-STAT signaling pathway	4	Socs5;Jak2;Stat4;Socs3;Cntfr
mmu04630	Jak-STAT signaling pathway	4	Socs5;Jak2;Stat4;Socs3;CR974586.2
mmu04630	Jak-STAT signaling pathway	4	Socs5;Jak2;Stat4;Socs3;Crlf2
mmu04630	Jak-STAT signaling pathway	4	Socs5;Jak2;Stat4;Socs3;Csf2rb
mmu04630	Jak-STAT signaling pathway	4	Socs5;Jak2;Stat4;Socs3;Csf2rb2
mmu04630	Jak-STAT signaling pathway	4	Socs5;Jak2;Stat4;Socs3;CT868723.4
mmu04630	Jak-STAT signaling pathway	4	Socs5;Jak2;Stat4;Socs3;Gm13305
mmu04630	Jak-STAT signaling pathway	4	Socs5;Jak2;Stat4;Socs3;Gm2002
mmu04630	Jak-STAT signaling pathway	4	Socs5;Jak2;Stat4;Socs3;Ifnar1
mmu04630	Jak-STAT signaling pathway	4	Socs5;Jak2;Stat4;Socs3;Ifnar2
mmu04630	Jak-STAT signaling pathway	4	Socs5;Jak2;Stat4;Socs3;Ifngr1
mmu04630	Jak-STAT signaling pathway	4	Socs5;Jak2;Stat4;Socs3;Ifngr2
mmu04630	Jak-STAT signaling pathway	4	Socs5;Jak2;Stat4;Socs3;Il10rb
mmu04630	Jak-STAT signaling pathway	4	Socs5;Jak2;Stat4;Socs3;Il11ra1
mmu04630	Jak-STAT signaling pathway	4	Socs5;Jak2;Stat4;Socs3;Il12rb1
mmu04630	Jak-STAT signaling pathway	4	Socs5;Jak2;Stat4;Socs3;Il13ra1
mmu04630	Jak-STAT signaling pathway	4	Socs5;Jak2;Stat4;Socs3;Il13ra2
mmu04630	Jak-STAT signaling pathway	4	Socs5;Jak2;Stat4;Socs3;Il15ra
mmu04630	Jak-STAT signaling pathway	4	Socs5;Jak2;Stat4;Socs3;Il20ra
mmu04630	Jak-STAT signaling pathway	4	Socs5;Jak2;Stat4;Socs3;Il21r
mmu04630	Jak-STAT signaling pathway	4	Socs5;Jak2;Stat4;Socs3;Il22ra1
mmu04630	Jak-STAT signaling pathway	4	Socs5;Jak2;Stat4;Socs3;Il22ra2
mmu04630	Jak-STAT signaling pathway	4	Socs5;Jak2;Stat4;Socs3;Il28ra
mmu04630	Jak-STAT signaling pathway	4	Socs5;Jak2;Stat4;Socs3;Il2ra
mmu04630	Jak-STAT signaling pathway	4	Socs5;Jak2;Stat4;Socs3;Il2rg
mmu04630	Jak-STAT signaling pathway	4	Socs5;Jak2;Stat4;Socs3;Il3ra
mmu04630	Jak-STAT signaling pathway	4	Socs5;Jak2;Stat4;Socs3;Il4ra
mmu04630	Jak-STAT signaling pathway	4	Socs5;Jak2;Stat4;Socs3;Il6ra
mmu04630	Jak-STAT signaling pathway	4	Socs5;Jak2;Stat4;Socs3;Il7r
mmu04630	Jak-STAT signaling pathway	4	Socs5;Jak2;Stat4;Socs3;Il9r
mmu04630	Jak-STAT signaling pathway	4	Socs5;Jak2;Stat4;Socs3;Lifr
mmu04630	Jak-STAT signaling pathway	4	Socs5;Jak2;Stat5a;Socs4;Il2rb
mmu04630	Jak-STAT signaling pathway	4	Socs5;Jak2;Stat5a;Socs4;Tyk2
mmu04630	Jak-STAT signaling pathway	4	Il13ra1;Jak2;Stat4;Socs3;Cntfr
mmu04630	Jak-STAT signaling pathway	4	Il13ra1;Jak2;Stat4;Socs3;CR974586.2
mmu04630	Jak-STAT signaling pathway	4	Il13ra1;Jak2;Stat4;Socs3;Crlf2
mmu04630	Jak-STAT signaling pathway	4	Il13ra1;Jak2;Stat4;Socs3;Csf2rb
mmu04630	Jak-STAT signaling pathway	4	Il13ra1;Jak2;Stat4;Socs3;Csf2rb2
mmu04630	Jak-STAT signaling pathway	4	Il13ra1;Jak2;Stat4;Socs3;CT868723.4
mmu04630	Jak-STAT signaling pathway	4	Il13ra1;Jak2;Stat4;Socs3;Gm13305
mmu04630	Jak-STAT signaling pathway	4	Il13ra1;Jak2;Stat4;Socs3;Gm2002
mmu04630	Jak-STAT signaling pathway	4	Il13ra1;Jak2;Stat4;Socs3;Ifnar1
mmu04630	Jak-STAT signaling pathway	4	Il13ra1;Jak2;Stat4;Socs3;Ifnar2
mmu04630	Jak-STAT signaling pathway	4	Il13ra1;Jak2;Stat4;Socs3;Ifngr1
mmu04630	Jak-STAT signaling pathway	4	Il13ra1;Jak2;Stat4;Socs3;Ifngr2
mmu04630	Jak-STAT signaling pathway	4	Il13ra1;Jak2;Stat4;Socs3;Il10rb
mmu04630	Jak-STAT signaling pathway	4	Il13ra1;Jak2;Stat4;Socs3;Il11ra1
mmu04630	Jak-STAT signaling pathway	4	Il13ra1;Jak2;Stat4;Socs3;Il12rb1
mmu04630	Jak-STAT signaling pathway	4	Il13ra1;Jak2;Stat4;Socs3;Il13ra2
mmu04630	Jak-STAT signaling pathway	4	Il13ra1;Jak2;Stat4;Socs3;Il15ra
mmu04630	Jak-STAT signaling pathway	4	Il13ra1;Jak2;Stat4;Socs3;Il20ra
mmu04630	Jak-STAT signaling pathway	4	Il13ra1;Jak2;Stat4;Socs3;Il21r
mmu04630	Jak-STAT signaling pathway	4	Il13ra1;Jak2;Stat4;Socs3;Il22ra1
mmu04630	Jak-STAT signaling pathway	4	Il13ra1;Jak2;Stat4;Socs3;Il22ra2
mmu04630	Jak-STAT signaling pathway	4	Il13ra1;Jak2;Stat4;Socs3;Il28ra
mmu04630	Jak-STAT signaling pathway	4	Il13ra1;Jak2;Stat4;Socs3;Il2ra
mmu04630	Jak-STAT signaling pathway	4	Il13ra1;Jak2;Stat4;Socs3;Il2rg
mmu04630	Jak-STAT signaling pathway	4	Il13ra1;Jak2;Stat4;Socs3;Il3ra
mmu04630	Jak-STAT signaling pathway	4	Il13ra1;Jak2;Stat4;Socs3;Il4ra
mmu04630	Jak-STAT signaling pathway	4	Il13ra1;Jak2;Stat4;Socs3;Il6ra
mmu04630	Jak-STAT signaling pathway	4	Il13ra1;Jak2;Stat4;Socs3;Il7r
mmu04630	Jak-STAT signaling pathway	4	Il13ra1;Jak2;Stat4;Socs3;Il9r
mmu04630	Jak-STAT signaling pathway	4	Il13ra1;Jak2;Stat4;Socs3;Lifr
mmu04630	Jak-STAT signaling pathway	4	Il13ra1;Jak2;Stat5a;Socs4;Il2rb
mmu04630	Jak-STAT signaling pathway	4	Il13ra1;Jak2;Stat5a;Socs4;Tyk2
mmu04630	Jak-STAT signaling pathway	4	Stat6;Socs3;Cntfr;Jak2;Pik3r5
mmu04630	Jak-STAT signaling pathway	4	Socs2;Jak2;Stat5a;Socs4;Il2rb
mmu04630	Jak-STAT signaling pathway	4	Socs2;Jak2;Stat5a;Socs4;Tyk2
mmu04630	Jak-STAT signaling pathway	4	Il21r;Jak2;Stat4;Socs3;Cntfr
mmu04630	Jak-STAT signaling pathway	4	Il21r;Jak2;Stat4;Socs3;CR974586.2
mmu04630	Jak-STAT signaling pathway	4	Il21r;Jak2;Stat4;Socs3;Crlf2
mmu04630	Jak-STAT signaling pathway	4	Il21r;Jak2;Stat4;Socs3;Csf2rb
mmu04630	Jak-STAT signaling pathway	4	Il21r;Jak2;Stat4;Socs3;Csf2rb2
mmu04630	Jak-STAT signaling pathway	4	Il21r;Jak2;Stat4;Socs3;CT868723.4
mmu04630	Jak-STAT signaling pathway	4	Il21r;Jak2;Stat4;Socs3;Gm13305
mmu04630	Jak-STAT signaling pathway	4	Il21r;Jak2;Stat4;Socs3;Gm2002
mmu04630	Jak-STAT signaling pathway	4	Il21r;Jak2;Stat4;Socs3;Ifnar1
mmu04630	Jak-STAT signaling pathway	4	Il21r;Jak2;Stat4;Socs3;Ifnar2
mmu04630	Jak-STAT signaling pathway	4	Il21r;Jak2;Stat4;Socs3;Ifngr1
mmu04630	Jak-STAT signaling pathway	4	Il21r;Jak2;Stat4;Socs3;Ifngr2
mmu04630	Jak-STAT signaling pathway	4	Il21r;Jak2;Stat4;Socs3;Il10rb
mmu04630	Jak-STAT signaling pathway	4	Il21r;Jak2;Stat4;Socs3;Il11ra1
mmu04630	Jak-STAT signaling pathway	4	Il21r;Jak2;Stat4;Socs3;Il12rb1
mmu04630	Jak-STAT signaling pathway	4	Il21r;Jak2;Stat4;Socs3;Il13ra1
mmu04630	Jak-STAT signaling pathway	4	Il21r;Jak2;Stat4;Socs3;Il13ra2
mmu04630	Jak-STAT signaling pathway	4	Il21r;Jak2;Stat4;Socs3;Il15ra
mmu04630	Jak-STAT signaling pathway	4	Il21r;Jak2;Stat4;Socs3;Il20ra
mmu04630	Jak-STAT signaling pathway	4	Il21r;Jak2;Stat4;Socs3;Il22ra1
mmu04630	Jak-STAT signaling pathway	4	Il21r;Jak2;Stat4;Socs3;Il22ra2
mmu04630	Jak-STAT signaling pathway	4	Il21r;Jak2;Stat4;Socs3;Il28ra
mmu04630	Jak-STAT signaling pathway	4	Il21r;Jak2;Stat4;Socs3;Il2ra
mmu04630	Jak-STAT signaling pathway	4	Il21r;Jak2;Stat4;Socs3;Il2rg
mmu04630	Jak-STAT signaling pathway	4	Il21r;Jak2;Stat4;Socs3;Il3ra
mmu04630	Jak-STAT signaling pathway	4	Il21r;Jak2;Stat4;Socs3;Il4ra
mmu04630	Jak-STAT signaling pathway	4	Il21r;Jak2;Stat4;Socs3;Il6ra
mmu04630	Jak-STAT signaling pathway	4	Il21r;Jak2;Stat4;Socs3;Il7r
mmu04630	Jak-STAT signaling pathway	4	Il21r;Jak2;Stat4;Socs3;Il9r
mmu04630	Jak-STAT signaling pathway	4	Il21r;Jak2;Stat4;Socs3;Lifr
mmu04630	Jak-STAT signaling pathway	4	Il21r;Jak2;Stat5a;Socs4;Il2rb
mmu04630	Jak-STAT signaling pathway	4	Il21r;Jak2;Stat5a;Socs4;Tyk2
mmu04630	Jak-STAT signaling pathway	4	Cish;Stat5a;Socs2;Jak2;Pik3cd
mmu04630	Jak-STAT signaling pathway	4	Cish;Stat5a;Socs2;Jak2;Pik3cg
mmu04630	Jak-STAT signaling pathway	4	Cish;Stat5a;Socs2;Jak2;Pik3r2
mmu04630	Jak-STAT signaling pathway	4	Cish;Stat5a;Socs2;Jak2;Pik3r3
mmu04630	Jak-STAT signaling pathway	4	Cish;Stat5a;Socs2;Jak2;Pik3r5
mmu04630	Jak-STAT signaling pathway	4	Cish;Stat5a;Socs2;Jak2;Stat6
mmu04630	Jak-STAT signaling pathway	4	Pias2;Stat5a;Socs2;Jak2;Pik3cd
mmu04630	Jak-STAT signaling pathway	4	Pias2;Stat5a;Socs2;Jak2;Pik3cg
mmu04630	Jak-STAT signaling pathway	4	Pias2;Stat5a;Socs2;Jak2;Pik3r2
mmu04630	Jak-STAT signaling pathway	4	Pias2;Stat5a;Socs2;Jak2;Pik3r3
mmu04630	Jak-STAT signaling pathway	4	Pias2;Stat5a;Socs2;Jak2;Pik3r5
mmu04630	Jak-STAT signaling pathway	4	Pias2;Stat5a;Socs2;Jak2;Stat6
mmu04630	Jak-STAT signaling pathway	4	Socs7;Jak2;Stat4;Socs3;Cntfr
mmu04630	Jak-STAT signaling pathway	4	Socs7;Jak2;Stat4;Socs3;CR974586.2
mmu04630	Jak-STAT signaling pathway	4	Socs7;Jak2;Stat4;Socs3;Crlf2
mmu04630	Jak-STAT signaling pathway	4	Socs7;Jak2;Stat4;Socs3;Csf2rb
mmu04630	Jak-STAT signaling pathway	4	Socs7;Jak2;Stat4;Socs3;Csf2rb2
mmu04630	Jak-STAT signaling pathway	4	Socs7;Jak2;Stat4;Socs3;CT868723.4
mmu04630	Jak-STAT signaling pathway	4	Socs7;Jak2;Stat4;Socs3;Gm13305
mmu04630	Jak-STAT signaling pathway	4	Socs7;Jak2;Stat4;Socs3;Gm2002
mmu04630	Jak-STAT signaling pathway	4	Socs7;Jak2;Stat4;Socs3;Ifnar1
mmu04630	Jak-STAT signaling pathway	4	Socs7;Jak2;Stat4;Socs3;Ifnar2
mmu04630	Jak-STAT signaling pathway	4	Socs7;Jak2;Stat4;Socs3;Ifngr1
mmu04630	Jak-STAT signaling pathway	4	Socs7;Jak2;Stat4;Socs3;Ifngr2
mmu04630	Jak-STAT signaling pathway	4	Socs7;Jak2;Stat4;Socs3;Il10rb
mmu04630	Jak-STAT signaling pathway	4	Socs7;Jak2;Stat4;Socs3;Il11ra1
mmu04630	Jak-STAT signaling pathway	4	Socs7;Jak2;Stat4;Socs3;Il12rb1
mmu04630	Jak-STAT signaling pathway	4	Socs7;Jak2;Stat4;Socs3;Il13ra1
mmu04630	Jak-STAT signaling pathway	4	Socs7;Jak2;Stat4;Socs3;Il13ra2
mmu04630	Jak-STAT signaling pathway	4	Socs7;Jak2;Stat4;Socs3;Il15ra
mmu04630	Jak-STAT signaling pathway	4	Socs7;Jak2;Stat4;Socs3;Il20ra
mmu04630	Jak-STAT signaling pathway	4	Socs7;Jak2;Stat4;Socs3;Il21r
mmu04630	Jak-STAT signaling pathway	4	Socs7;Jak2;Stat4;Socs3;Il22ra1
mmu04630	Jak-STAT signaling pathway	4	Socs7;Jak2;Stat4;Socs3;Il22ra2
mmu04630	Jak-STAT signaling pathway	4	Socs7;Jak2;Stat4;Socs3;Il28ra
mmu04630	Jak-STAT signaling pathway	4	Socs7;Jak2;Stat4;Socs3;Il2ra
mmu04630	Jak-STAT signaling pathway	4	Socs7;Jak2;Stat4;Socs3;Il2rg
mmu04630	Jak-STAT signaling pathway	4	Socs7;Jak2;Stat4;Socs3;Il3ra
mmu04630	Jak-STAT signaling pathway	4	Socs7;Jak2;Stat4;Socs3;Il4ra
mmu04630	Jak-STAT signaling pathway	4	Socs7;Jak2;Stat4;Socs3;Il6ra
mmu04630	Jak-STAT signaling pathway	4	Socs7;Jak2;Stat4;Socs3;Il7r
mmu04630	Jak-STAT signaling pathway	4	Socs7;Jak2;Stat4;Socs3;Il9r
mmu04630	Jak-STAT signaling pathway	4	Socs7;Jak2;Stat4;Socs3;Lifr
mmu04630	Jak-STAT signaling pathway	4	Socs7;Jak2;Stat5a;Socs4;Il2rb
mmu04630	Jak-STAT signaling pathway	4	Socs7;Jak2;Stat5a;Socs4;Tyk2
mmu04630	Jak-STAT signaling pathway	4	Pias3;Stat5a;Socs2;Jak2;Pik3cd
mmu04630	Jak-STAT signaling pathway	4	Pias3;Stat5a;Socs2;Jak2;Pik3cg
mmu04630	Jak-STAT signaling pathway	4	Pias3;Stat5a;Socs2;Jak2;Pik3r2
mmu04630	Jak-STAT signaling pathway	4	Pias3;Stat5a;Socs2;Jak2;Pik3r3
mmu04630	Jak-STAT signaling pathway	4	Pias3;Stat5a;Socs2;Jak2;Pik3r5
mmu04630	Jak-STAT signaling pathway	4	Pias3;Stat5a;Socs2;Jak2;Stat6
mmu04630	Jak-STAT signaling pathway	4	Cbl;Jak2;Stat4;Socs3;Cntfr
mmu04630	Jak-STAT signaling pathway	4	Cbl;Jak2;Stat4;Socs3;CR974586.2
mmu04630	Jak-STAT signaling pathway	4	Cbl;Jak2;Stat4;Socs3;Crlf2
mmu04630	Jak-STAT signaling pathway	4	Cbl;Jak2;Stat4;Socs3;Csf2rb
mmu04630	Jak-STAT signaling pathway	4	Cbl;Jak2;Stat4;Socs3;Csf2rb2
mmu04630	Jak-STAT signaling pathway	4	Cbl;Jak2;Stat4;Socs3;CT868723.4
mmu04630	Jak-STAT signaling pathway	4	Cbl;Jak2;Stat4;Socs3;Gm13305
mmu04630	Jak-STAT signaling pathway	4	Cbl;Jak2;Stat4;Socs3;Gm2002
mmu04630	Jak-STAT signaling pathway	4	Cbl;Jak2;Stat4;Socs3;Ifnar1
mmu04630	Jak-STAT signaling pathway	4	Cbl;Jak2;Stat4;Socs3;Ifnar2
mmu04630	Jak-STAT signaling pathway	4	Cbl;Jak2;Stat4;Socs3;Ifngr1
mmu04630	Jak-STAT signaling pathway	4	Cbl;Jak2;Stat4;Socs3;Ifngr2
mmu04630	Jak-STAT signaling pathway	4	Cbl;Jak2;Stat4;Socs3;Il10rb
mmu04630	Jak-STAT signaling pathway	4	Cbl;Jak2;Stat4;Socs3;Il11ra1
mmu04630	Jak-STAT signaling pathway	4	Cbl;Jak2;Stat4;Socs3;Il12rb1
mmu04630	Jak-STAT signaling pathway	4	Cbl;Jak2;Stat4;Socs3;Il13ra1
mmu04630	Jak-STAT signaling pathway	4	Cbl;Jak2;Stat4;Socs3;Il13ra2
mmu04630	Jak-STAT signaling pathway	4	Cbl;Jak2;Stat4;Socs3;Il15ra
mmu04630	Jak-STAT signaling pathway	4	Cbl;Jak2;Stat4;Socs3;Il20ra
mmu04630	Jak-STAT signaling pathway	4	Cbl;Jak2;Stat4;Socs3;Il21r
mmu04630	Jak-STAT signaling pathway	4	Cbl;Jak2;Stat4;Socs3;Il22ra1
mmu04630	Jak-STAT signaling pathway	4	Cbl;Jak2;Stat4;Socs3;Il22ra2
mmu04630	Jak-STAT signaling pathway	4	Cbl;Jak2;Stat4;Socs3;Il28ra
mmu04630	Jak-STAT signaling pathway	4	Cbl;Jak2;Stat4;Socs3;Il2ra
mmu04630	Jak-STAT signaling pathway	4	Cbl;Jak2;Stat4;Socs3;Il2rg
mmu04630	Jak-STAT signaling pathway	4	Cbl;Jak2;Stat4;Socs3;Il3ra
mmu04630	Jak-STAT signaling pathway	4	Cbl;Jak2;Stat4;Socs3;Il4ra
mmu04630	Jak-STAT signaling pathway	4	Cbl;Jak2;Stat4;Socs3;Il6ra
mmu04630	Jak-STAT signaling pathway	4	Cbl;Jak2;Stat4;Socs3;Il7r
mmu04630	Jak-STAT signaling pathway	4	Cbl;Jak2;Stat4;Socs3;Il9r
mmu04630	Jak-STAT signaling pathway	4	Cbl;Jak2;Stat4;Socs3;Lifr
mmu04630	Jak-STAT signaling pathway	4	Cbl;Jak2;Stat5a;Socs4;Il2rb
mmu04630	Jak-STAT signaling pathway	4	Cbl;Jak2;Stat5a;Socs4;Tyk2
mmu04630	Jak-STAT signaling pathway	4	Stat5b;Socs3;Cntfr;Jak2;Pik3cd
mmu04630	Jak-STAT signaling pathway	4	Stat5b;Socs3;Cntfr;Jak2;Pik3cg
mmu04630	Jak-STAT signaling pathway	4	Stat5b;Socs3;Cntfr;Jak2;Pik3r2
mmu04630	Jak-STAT signaling pathway	4	Stat5b;Socs3;Cntfr;Jak2;Pik3r3
mmu04630	Jak-STAT signaling pathway	4	Stat5b;Socs3;Cntfr;Jak2;Pik3r5
mmu04630	Jak-STAT signaling pathway	4	Stat5b;Socs3;Cntfr;Jak2;Stat4
mmu04630	Jak-STAT signaling pathway	4	Stat5b;Socs3;Cntfr;Jak2;Stat6
mmu04630	Jak-STAT signaling pathway	4	Il6ra;Jak2;Stat4;Socs3;Cntfr
mmu04630	Jak-STAT signaling pathway	4	Il6ra;Jak2;Stat4;Socs3;CR974586.2
mmu04630	Jak-STAT signaling pathway	4	Il6ra;Jak2;Stat4;Socs3;Crlf2
mmu04630	Jak-STAT signaling pathway	4	Il6ra;Jak2;Stat4;Socs3;Csf2rb
mmu04630	Jak-STAT signaling pathway	4	Il6ra;Jak2;Stat4;Socs3;Csf2rb2
mmu04630	Jak-STAT signaling pathway	4	Il6ra;Jak2;Stat4;Socs3;CT868723.4
mmu04630	Jak-STAT signaling pathway	4	Il6ra;Jak2;Stat4;Socs3;Gm13305
mmu04630	Jak-STAT signaling pathway	4	Il6ra;Jak2;Stat4;Socs3;Gm2002
mmu04630	Jak-STAT signaling pathway	4	Il6ra;Jak2;Stat4;Socs3;Ifnar1
mmu04630	Jak-STAT signaling pathway	4	Il6ra;Jak2;Stat4;Socs3;Ifnar2
mmu04630	Jak-STAT signaling pathway	4	Il6ra;Jak2;Stat4;Socs3;Ifngr1
mmu04630	Jak-STAT signaling pathway	4	Il6ra;Jak2;Stat4;Socs3;Ifngr2
mmu04630	Jak-STAT signaling pathway	4	Il6ra;Jak2;Stat4;Socs3;Il10rb
mmu04630	Jak-STAT signaling pathway	4	Il6ra;Jak2;Stat4;Socs3;Il11ra1
mmu04630	Jak-STAT signaling pathway	4	Il6ra;Jak2;Stat4;Socs3;Il12rb1
mmu04630	Jak-STAT signaling pathway	4	Il6ra;Jak2;Stat4;Socs3;Il13ra1
mmu04630	Jak-STAT signaling pathway	4	Il6ra;Jak2;Stat4;Socs3;Il13ra2
mmu04630	Jak-STAT signaling pathway	4	Il6ra;Jak2;Stat4;Socs3;Il15ra
mmu04630	Jak-STAT signaling pathway	4	Il6ra;Jak2;Stat4;Socs3;Il20ra
mmu04630	Jak-STAT signaling pathway	4	Il6ra;Jak2;Stat4;Socs3;Il21r
mmu04630	Jak-STAT signaling pathway	4	Il6ra;Jak2;Stat4;Socs3;Il22ra1
mmu04630	Jak-STAT signaling pathway	4	Il6ra;Jak2;Stat4;Socs3;Il22ra2
mmu04630	Jak-STAT signaling pathway	4	Il6ra;Jak2;Stat4;Socs3;Il28ra
mmu04630	Jak-STAT signaling pathway	4	Il6ra;Jak2;Stat4;Socs3;Il2ra
mmu04630	Jak-STAT signaling pathway	4	Il6ra;Jak2;Stat4;Socs3;Il2rg
mmu04630	Jak-STAT signaling pathway	4	Il6ra;Jak2;Stat4;Socs3;Il3ra
mmu04630	Jak-STAT signaling pathway	4	Il6ra;Jak2;Stat4;Socs3;Il4ra
mmu04630	Jak-STAT signaling pathway	4	Il6ra;Jak2;Stat4;Socs3;Il7r
mmu04630	Jak-STAT signaling pathway	4	Il6ra;Jak2;Stat4;Socs3;Il9r
mmu04630	Jak-STAT signaling pathway	4	Il6ra;Jak2;Stat4;Socs3;Lifr
mmu04630	Jak-STAT signaling pathway	4	Il6ra;Jak2;Stat5a;Socs4;Il2rb
mmu04630	Jak-STAT signaling pathway	4	Il6ra;Jak2;Stat5a;Socs4;Tyk2
mmu04630	Jak-STAT signaling pathway	4	Stat2;Socs3;Cntfr;Jak2;Pik3cd
mmu04630	Jak-STAT signaling pathway	4	Stat2;Socs3;Cntfr;Jak2;Pik3cg
mmu04630	Jak-STAT signaling pathway	4	Stat2;Socs3;Cntfr;Jak2;Pik3r2
mmu04630	Jak-STAT signaling pathway	4	Stat2;Socs3;Cntfr;Jak2;Pik3r3
mmu04630	Jak-STAT signaling pathway	4	Stat2;Socs3;Cntfr;Jak2;Pik3r5
mmu04630	Jak-STAT signaling pathway	4	Stat2;Socs3;Cntfr;Jak2;Stat4
mmu04630	Jak-STAT signaling pathway	4	Stat2;Socs3;Cntfr;Jak2;Stat6
mmu04630	Jak-STAT signaling pathway	4	Socs4;Il2rb;Jak2;Pik3ca;Akt2
mmu04630	Jak-STAT signaling pathway	4	Socs4;Il2rb;Jak2;Pik3ca;Akt3
mmu04630	Jak-STAT signaling pathway	4	Socs4;Il2rb;Jak2;Pik3cb;Akt1
mmu04630	Jak-STAT signaling pathway	4	Socs4;Il2rb;Jak2;Stat5a;Ccnd1
mmu04630	Jak-STAT signaling pathway	4	Socs4;Il2rb;Jak2;Stat5a;Ccnd3
mmu04630	Jak-STAT signaling pathway	4	Socs4;Il2rb;Jak2;Stat5a;Myc
mmu04630	Jak-STAT signaling pathway	4	Socs4;Il2rb;Jak2;Stat5a;Pim1
mmu04630	Jak-STAT signaling pathway	4	Socs4;Il2rb;Jak2;Stat5a;Socs1
mmu04630	Jak-STAT signaling pathway	4	Socs4;Il2rb;Jak2;Stat5a;Socs2
mmu04630	Jak-STAT signaling pathway	4	Socs4;Il2rb;Jak2;Stat5a;Socs5
mmu04630	Jak-STAT signaling pathway	4	Socs4;Il2rb;Jak2;Stat5a;Socs7
mmu04630	Jak-STAT signaling pathway	4	Il10ra;Jak2;Stat4;Socs3;Cntfr
mmu04630	Jak-STAT signaling pathway	4	Il10ra;Jak2;Stat4;Socs3;CR974586.2
mmu04630	Jak-STAT signaling pathway	4	Il10ra;Jak2;Stat4;Socs3;Crlf2
mmu04630	Jak-STAT signaling pathway	4	Il10ra;Jak2;Stat4;Socs3;Csf2rb
mmu04630	Jak-STAT signaling pathway	4	Il10ra;Jak2;Stat4;Socs3;Csf2rb2
mmu04630	Jak-STAT signaling pathway	4	Il10ra;Jak2;Stat4;Socs3;CT868723.4
mmu04630	Jak-STAT signaling pathway	4	Il10ra;Jak2;Stat4;Socs3;Gm13305
mmu04630	Jak-STAT signaling pathway	4	Il10ra;Jak2;Stat4;Socs3;Gm2002
mmu04630	Jak-STAT signaling pathway	4	Il10ra;Jak2;Stat4;Socs3;Ifnar1
mmu04630	Jak-STAT signaling pathway	4	Il10ra;Jak2;Stat4;Socs3;Ifnar2
mmu04630	Jak-STAT signaling pathway	4	Il10ra;Jak2;Stat4;Socs3;Ifngr1
mmu04630	Jak-STAT signaling pathway	4	Il10ra;Jak2;Stat4;Socs3;Ifngr2
mmu04630	Jak-STAT signaling pathway	4	Il10ra;Jak2;Stat4;Socs3;Il10rb
mmu04630	Jak-STAT signaling pathway	4	Il10ra;Jak2;Stat4;Socs3;Il11ra1
mmu04630	Jak-STAT signaling pathway	4	Il10ra;Jak2;Stat4;Socs3;Il12rb1
mmu04630	Jak-STAT signaling pathway	4	Il10ra;Jak2;Stat4;Socs3;Il13ra1
mmu04630	Jak-STAT signaling pathway	4	Il10ra;Jak2;Stat4;Socs3;Il13ra2
mmu04630	Jak-STAT signaling pathway	4	Il10ra;Jak2;Stat4;Socs3;Il15ra
mmu04630	Jak-STAT signaling pathway	4	Il10ra;Jak2;Stat4;Socs3;Il20ra
mmu04630	Jak-STAT signaling pathway	4	Il10ra;Jak2;Stat4;Socs3;Il21r
mmu04630	Jak-STAT signaling pathway	4	Il10ra;Jak2;Stat4;Socs3;Il22ra1
mmu04630	Jak-STAT signaling pathway	4	Il10ra;Jak2;Stat4;Socs3;Il22ra2
mmu04630	Jak-STAT signaling pathway	4	Il10ra;Jak2;Stat4;Socs3;Il28ra
mmu04630	Jak-STAT signaling pathway	4	Il10ra;Jak2;Stat4;Socs3;Il2ra
mmu04630	Jak-STAT signaling pathway	4	Il10ra;Jak2;Stat4;Socs3;Il2rg
mmu04630	Jak-STAT signaling pathway	4	Il10ra;Jak2;Stat4;Socs3;Il3ra
mmu04630	Jak-STAT signaling pathway	4	Il10ra;Jak2;Stat4;Socs3;Il4ra
mmu04630	Jak-STAT signaling pathway	4	Il10ra;Jak2;Stat4;Socs3;Il6ra
mmu04630	Jak-STAT signaling pathway	4	Il10ra;Jak2;Stat4;Socs3;Il7r
mmu04630	Jak-STAT signaling pathway	4	Il10ra;Jak2;Stat4;Socs3;Il9r
mmu04630	Jak-STAT signaling pathway	4	Il10ra;Jak2;Stat4;Socs3;Lifr
mmu04630	Jak-STAT signaling pathway	4	Il10ra;Jak2;Stat5a;Socs4;Il2rb
mmu04630	Jak-STAT signaling pathway	4	Il10ra;Jak2;Stat5a;Socs4;Tyk2
mmu04630	Jak-STAT signaling pathway	4	Il2rb;Jak2;Stat5a;Socs4;Tyk2
mmu04630	Jak-STAT signaling pathway	4	Il28ra;Jak2;Stat4;Socs3;Cntfr
mmu04630	Jak-STAT signaling pathway	4	Il28ra;Jak2;Stat4;Socs3;CR974586.2
mmu04630	Jak-STAT signaling pathway	4	Il28ra;Jak2;Stat4;Socs3;Crlf2
mmu04630	Jak-STAT signaling pathway	4	Il28ra;Jak2;Stat4;Socs3;Csf2rb
mmu04630	Jak-STAT signaling pathway	4	Il28ra;Jak2;Stat4;Socs3;Csf2rb2
mmu04630	Jak-STAT signaling pathway	4	Il28ra;Jak2;Stat4;Socs3;CT868723.4
mmu04630	Jak-STAT signaling pathway	4	Il28ra;Jak2;Stat4;Socs3;Gm13305
mmu04630	Jak-STAT signaling pathway	4	Il28ra;Jak2;Stat4;Socs3;Gm2002
mmu04630	Jak-STAT signaling pathway	4	Il28ra;Jak2;Stat4;Socs3;Ifnar1
mmu04630	Jak-STAT signaling pathway	4	Il28ra;Jak2;Stat4;Socs3;Ifnar2
mmu04630	Jak-STAT signaling pathway	4	Il28ra;Jak2;Stat4;Socs3;Ifngr1
mmu04630	Jak-STAT signaling pathway	4	Il28ra;Jak2;Stat4;Socs3;Ifngr2
mmu04630	Jak-STAT signaling pathway	4	Il28ra;Jak2;Stat4;Socs3;Il10rb
mmu04630	Jak-STAT signaling pathway	4	Il28ra;Jak2;Stat4;Socs3;Il11ra1
mmu04630	Jak-STAT signaling pathway	4	Il28ra;Jak2;Stat4;Socs3;Il12rb1
mmu04630	Jak-STAT signaling pathway	4	Il28ra;Jak2;Stat4;Socs3;Il13ra1
mmu04630	Jak-STAT signaling pathway	4	Il28ra;Jak2;Stat4;Socs3;Il13ra2
mmu04630	Jak-STAT signaling pathway	4	Il28ra;Jak2;Stat4;Socs3;Il15ra
mmu04630	Jak-STAT signaling pathway	4	Il28ra;Jak2;Stat4;Socs3;Il20ra
mmu04630	Jak-STAT signaling pathway	4	Il28ra;Jak2;Stat4;Socs3;Il21r
mmu04630	Jak-STAT signaling pathway	4	Il28ra;Jak2;Stat4;Socs3;Il22ra1
mmu04630	Jak-STAT signaling pathway	4	Il28ra;Jak2;Stat4;Socs3;Il22ra2
mmu04630	Jak-STAT signaling pathway	4	Il28ra;Jak2;Stat4;Socs3;Il2ra
mmu04630	Jak-STAT signaling pathway	4	Il28ra;Jak2;Stat4;Socs3;Il2rg
mmu04630	Jak-STAT signaling pathway	4	Il28ra;Jak2;Stat4;Socs3;Il3ra
mmu04630	Jak-STAT signaling pathway	4	Il28ra;Jak2;Stat4;Socs3;Il4ra
mmu04630	Jak-STAT signaling pathway	4	Il28ra;Jak2;Stat4;Socs3;Il6ra
mmu04630	Jak-STAT signaling pathway	4	Il28ra;Jak2;Stat4;Socs3;Il7r
mmu04630	Jak-STAT signaling pathway	4	Il28ra;Jak2;Stat4;Socs3;Il9r
mmu04630	Jak-STAT signaling pathway	4	Il28ra;Jak2;Stat4;Socs3;Lifr
mmu04630	Jak-STAT signaling pathway	4	Il28ra;Jak2;Stat5a;Socs4;Il2rb
mmu04630	Jak-STAT signaling pathway	4	Il28ra;Jak2;Stat5a;Socs4;Tyk2
mmu04630	Jak-STAT signaling pathway	4	Stat4;Socs3;Cntfr;Jak2;Pik3cd
mmu04630	Jak-STAT signaling pathway	4	Stat4;Socs3;Cntfr;Jak2;Pik3cg
mmu04630	Jak-STAT signaling pathway	4	Stat4;Socs3;Cntfr;Jak2;Pik3r2
mmu04630	Jak-STAT signaling pathway	4	Stat4;Socs3;Cntfr;Jak2;Pik3r3
mmu04630	Jak-STAT signaling pathway	4	Stat4;Socs3;Cntfr;Jak2;Pik3r5
mmu04630	Jak-STAT signaling pathway	4	Stat4;Socs3;Cntfr;Jak2;Stat6
mmu04630	Jak-STAT signaling pathway	4	Ifnar1;Jak2;Stat4;Socs3;Cntfr
mmu04630	Jak-STAT signaling pathway	4	Ifnar1;Jak2;Stat4;Socs3;CR974586.2
mmu04630	Jak-STAT signaling pathway	4	Ifnar1;Jak2;Stat4;Socs3;Crlf2
mmu04630	Jak-STAT signaling pathway	4	Ifnar1;Jak2;Stat4;Socs3;Csf2rb
mmu04630	Jak-STAT signaling pathway	4	Ifnar1;Jak2;Stat4;Socs3;Csf2rb2
mmu04630	Jak-STAT signaling pathway	4	Ifnar1;Jak2;Stat4;Socs3;CT868723.4
mmu04630	Jak-STAT signaling pathway	4	Ifnar1;Jak2;Stat4;Socs3;Gm13305
mmu04630	Jak-STAT signaling pathway	4	Ifnar1;Jak2;Stat4;Socs3;Gm2002
mmu04630	Jak-STAT signaling pathway	4	Ifnar1;Jak2;Stat4;Socs3;Ifnar2
mmu04630	Jak-STAT signaling pathway	4	Ifnar1;Jak2;Stat4;Socs3;Ifngr1
mmu04630	Jak-STAT signaling pathway	4	Ifnar1;Jak2;Stat4;Socs3;Ifngr2
mmu04630	Jak-STAT signaling pathway	4	Ifnar1;Jak2;Stat4;Socs3;Il10rb
mmu04630	Jak-STAT signaling pathway	4	Ifnar1;Jak2;Stat4;Socs3;Il11ra1
mmu04630	Jak-STAT signaling pathway	4	Ifnar1;Jak2;Stat4;Socs3;Il12rb1
mmu04630	Jak-STAT signaling pathway	4	Ifnar1;Jak2;Stat4;Socs3;Il13ra1
mmu04630	Jak-STAT signaling pathway	4	Ifnar1;Jak2;Stat4;Socs3;Il13ra2
mmu04630	Jak-STAT signaling pathway	4	Ifnar1;Jak2;Stat4;Socs3;Il15ra
mmu04630	Jak-STAT signaling pathway	4	Ifnar1;Jak2;Stat4;Socs3;Il20ra
mmu04630	Jak-STAT signaling pathway	4	Ifnar1;Jak2;Stat4;Socs3;Il21r
mmu04630	Jak-STAT signaling pathway	4	Ifnar1;Jak2;Stat4;Socs3;Il22ra1
mmu04630	Jak-STAT signaling pathway	4	Ifnar1;Jak2;Stat4;Socs3;Il22ra2
mmu04630	Jak-STAT signaling pathway	4	Ifnar1;Jak2;Stat4;Socs3;Il28ra
mmu04630	Jak-STAT signaling pathway	4	Ifnar1;Jak2;Stat4;Socs3;Il2ra
mmu04630	Jak-STAT signaling pathway	4	Ifnar1;Jak2;Stat4;Socs3;Il2rg
mmu04630	Jak-STAT signaling pathway	4	Ifnar1;Jak2;Stat4;Socs3;Il3ra
mmu04630	Jak-STAT signaling pathway	4	Ifnar1;Jak2;Stat4;Socs3;Il4ra
mmu04630	Jak-STAT signaling pathway	4	Ifnar1;Jak2;Stat4;Socs3;Il6ra
mmu04630	Jak-STAT signaling pathway	4	Ifnar1;Jak2;Stat4;Socs3;Il7r
mmu04630	Jak-STAT signaling pathway	4	Ifnar1;Jak2;Stat4;Socs3;Il9r
mmu04630	Jak-STAT signaling pathway	4	Ifnar1;Jak2;Stat4;Socs3;Lifr
mmu04630	Jak-STAT signaling pathway	4	Ifnar1;Jak2;Stat5a;Socs4;Il2rb
mmu04630	Jak-STAT signaling pathway	4	Ifnar1;Jak2;Stat5a;Socs4;Tyk2
mmu04630	Jak-STAT signaling pathway	4	Il9r;Jak2;Stat4;Socs3;Cntfr
mmu04630	Jak-STAT signaling pathway	4	Il9r;Jak2;Stat4;Socs3;CR974586.2
mmu04630	Jak-STAT signaling pathway	4	Il9r;Jak2;Stat4;Socs3;Crlf2
mmu04630	Jak-STAT signaling pathway	4	Il9r;Jak2;Stat4;Socs3;Csf2rb
mmu04630	Jak-STAT signaling pathway	4	Il9r;Jak2;Stat4;Socs3;Csf2rb2
mmu04630	Jak-STAT signaling pathway	4	Il9r;Jak2;Stat4;Socs3;CT868723.4
mmu04630	Jak-STAT signaling pathway	4	Il9r;Jak2;Stat4;Socs3;Gm13305
mmu04630	Jak-STAT signaling pathway	4	Il9r;Jak2;Stat4;Socs3;Gm2002
mmu04630	Jak-STAT signaling pathway	4	Il9r;Jak2;Stat4;Socs3;Ifnar1
mmu04630	Jak-STAT signaling pathway	4	Il9r;Jak2;Stat4;Socs3;Ifnar2
mmu04630	Jak-STAT signaling pathway	4	Il9r;Jak2;Stat4;Socs3;Ifngr1
mmu04630	Jak-STAT signaling pathway	4	Il9r;Jak2;Stat4;Socs3;Ifngr2
mmu04630	Jak-STAT signaling pathway	4	Il9r;Jak2;Stat4;Socs3;Il10rb
mmu04630	Jak-STAT signaling pathway	4	Il9r;Jak2;Stat4;Socs3;Il11ra1
mmu04630	Jak-STAT signaling pathway	4	Il9r;Jak2;Stat4;Socs3;Il12rb1
mmu04630	Jak-STAT signaling pathway	4	Il9r;Jak2;Stat4;Socs3;Il13ra1
mmu04630	Jak-STAT signaling pathway	4	Il9r;Jak2;Stat4;Socs3;Il13ra2
mmu04630	Jak-STAT signaling pathway	4	Il9r;Jak2;Stat4;Socs3;Il15ra
mmu04630	Jak-STAT signaling pathway	4	Il9r;Jak2;Stat4;Socs3;Il20ra
mmu04630	Jak-STAT signaling pathway	4	Il9r;Jak2;Stat4;Socs3;Il21r
mmu04630	Jak-STAT signaling pathway	4	Il9r;Jak2;Stat4;Socs3;Il22ra1
mmu04630	Jak-STAT signaling pathway	4	Il9r;Jak2;Stat4;Socs3;Il22ra2
mmu04630	Jak-STAT signaling pathway	4	Il9r;Jak2;Stat4;Socs3;Il28ra
mmu04630	Jak-STAT signaling pathway	4	Il9r;Jak2;Stat4;Socs3;Il2ra
mmu04630	Jak-STAT signaling pathway	4	Il9r;Jak2;Stat4;Socs3;Il2rg
mmu04630	Jak-STAT signaling pathway	4	Il9r;Jak2;Stat4;Socs3;Il3ra
mmu04630	Jak-STAT signaling pathway	4	Il9r;Jak2;Stat4;Socs3;Il4ra
mmu04630	Jak-STAT signaling pathway	4	Il9r;Jak2;Stat4;Socs3;Il6ra
mmu04630	Jak-STAT signaling pathway	4	Il9r;Jak2;Stat4;Socs3;Il7r
mmu04630	Jak-STAT signaling pathway	4	Il9r;Jak2;Stat4;Socs3;Lifr
mmu04630	Jak-STAT signaling pathway	4	Il9r;Jak2;Stat5a;Socs4;Il2rb
mmu04630	Jak-STAT signaling pathway	4	Il9r;Jak2;Stat5a;Socs4;Tyk2
mmu04010	MAPK signaling pathway	3	Dusp6;Mapk11;Mapkapk2;Atf4
mmu04010	MAPK signaling pathway	3	Dusp6;Mapk11;Mapkapk2;Hspb1
mmu04010	MAPK signaling pathway	3	Dusp1;Mapk11;Mapkapk2;Atf4
mmu04010	MAPK signaling pathway	3	Dusp1;Mapk11;Mapkapk2;Hspb1
mmu04010	MAPK signaling pathway	3	Dusp5;Mapk12;Mapkapk2;Atf4
mmu04010	MAPK signaling pathway	3	Dusp5;Mapk12;Mapkapk2;Hspb1
mmu04010	MAPK signaling pathway	3	Dusp4;Mapk11;Mapkapk2;Atf4
mmu04010	MAPK signaling pathway	3	Dusp4;Mapk11;Mapkapk2;Hspb1
mmu04010	MAPK signaling pathway	3	Dusp16;Mapk12;Mapkapk2;Atf4
mmu04010	MAPK signaling pathway	3	Dusp16;Mapk12;Mapkapk2;Hspb1
mmu04012	ErbB signaling pathway	3	Ereg;Egfr;Egfr-Egfr;Src
mmu04012	ErbB signaling pathway	3	Ereg;Egfr;Egfr-Egfr;Stat5a
mmu04062	Chemokine signaling pathway	3	Ccl3;Ccr2;Jak3;Stat5b
mmu04062	Chemokine signaling pathway	3	Ccl22;Ccr2;Jak3;Stat5b
mmu04062	Chemokine signaling pathway	3	Cxcl2;Ccr10;Jak2;Stat1
mmu04062	Chemokine signaling pathway	3	Cxcl2;Ccr10;Jak2;Stat2
mmu04062	Chemokine signaling pathway	3	Cxcl2;Ccr10;Jak2;Stat3
mmu04062	Chemokine signaling pathway	3	Cxcl2;Ccr10;Jak2;Stat5b
mmu04062	Chemokine signaling pathway	3	Ccr7;Gnai1;Src;Pik3cg
mmu04062	Chemokine signaling pathway	3	Ccr7;Gnai1;Src;Pik3r2
mmu04062	Chemokine signaling pathway	3	Ccr7;Gnai1;Src;Shc3
mmu04062	Chemokine signaling pathway	3	Ccr7;Gnai1;Src;Shc4
mmu04062	Chemokine signaling pathway	3	Ccr5;Gnai2;Src;Pik3cg
mmu04062	Chemokine signaling pathway	3	Ccr5;Gnai2;Src;Pik3r2
mmu04062	Chemokine signaling pathway	3	Ccr5;Gnai2;Src;Shc3
mmu04062	Chemokine signaling pathway	3	Ccr5;Gnai2;Src;Shc4
mmu04062	Chemokine signaling pathway	3	Ccl4;Ccr2;Jak3;Stat5b
mmu04110	Cell cycle	3	Atm;Trp53;Gadd45b;Ccnb2
mmu04110	Cell cycle	3	Gadd45a;Pcna;Ccnd2;Rbl1
mmu04110	Cell cycle	3	Gadd45a;Pcna;Ccnd2;Rbl2
mmu04360	Axon guidance	3	Efna2;Epha4;Ngef;Rac1
mmu04360	Axon guidance	3	Efna2;Epha4;Ngef;Rac2
mmu04360	Axon guidance	3	Fes;Plxna4;Rnd1;Arhgef12
mmu04360	Axon guidance	3	Efna1;Epha4;Ngef;Rac1
mmu04360	Axon guidance	3	Efna1;Epha4;Ngef;Rac2
mmu04360	Axon guidance	3	Efna4;Epha4;Ngef;Rac1
mmu04360	Axon guidance	3	Efna4;Epha4;Ngef;Rac2
mmu04360	Axon guidance	3	Efna5;Epha4;Ngef;Rac1
mmu04360	Axon guidance	3	Efna5;Epha4;Ngef;Rac2
mmu04510	Focal adhesion	3	Pxn;Itgb5;Src;Arhgap5
mmu04510	Focal adhesion	3	Flna;Itgb7;Src;Arhgap5
mmu04510	Focal adhesion	3	Spp1;Itgb6;Src;Arhgap5
mmu04520	Adherens junction	3	Pvrl1;Src;Farp2;Cdc42
mmu04540	Gap junction	3	Pdgfra;Src;Gjd2;Tjp1
mmu04620	Toll-like receptor signaling pathway	3	Ikbkb;Ikbkb-Chuk-Ikbkg;Nfkb1;Ccl5
mmu04620	Toll-like receptor signaling pathway	3	Ikbkb;Ikbkb-Chuk-Ikbkg;Nfkb1;Il1b
mmu04620	Toll-like receptor signaling pathway	3	Ikbkb;Ikbkb-Chuk-Ikbkg;Nfkb1;Tnf
mmu04620	Toll-like receptor signaling pathway	3	Chuk;Ikbkb-Chuk-Ikbkg;Nfkb1;Ccl5
mmu04620	Toll-like receptor signaling pathway	3	Chuk;Ikbkb-Chuk-Ikbkg;Nfkb1;Il1b
mmu04620	Toll-like receptor signaling pathway	3	Chuk;Ikbkb-Chuk-Ikbkg;Nfkb1;Tnf
mmu04620	Toll-like receptor signaling pathway	3	Ikbkg;Ikbkb-Chuk-Ikbkg;Nfkb1;Ccl5
mmu04620	Toll-like receptor signaling pathway	3	Ikbkg;Ikbkb-Chuk-Ikbkg;Nfkb1;Il1b
mmu04620	Toll-like receptor signaling pathway	3	Ikbkg;Ikbkb-Chuk-Ikbkg;Nfkb1;Tnf
mmu04630	Jak-STAT signaling pathway	3	Il10rb;Jak2;Pik3ca;Akt2
mmu04630	Jak-STAT signaling pathway	3	Il10rb;Jak2;Pik3ca;Akt3
mmu04630	Jak-STAT signaling pathway	3	Il10rb;Jak2;Pik3cb;Akt1
mmu04630	Jak-STAT signaling pathway	3	Il10rb;Jak2;Stat5a;Ccnd1
mmu04630	Jak-STAT signaling pathway	3	Il10rb;Jak2;Stat5a;Ccnd3
mmu04630	Jak-STAT signaling pathway	3	Il10rb;Jak2;Stat5a;Myc
mmu04630	Jak-STAT signaling pathway	3	Il10rb;Jak2;Stat5a;Pim1
mmu04630	Jak-STAT signaling pathway	3	Il10rb;Jak2;Stat5a;Socs1
mmu04630	Jak-STAT signaling pathway	3	Il10rb;Jak2;Stat5a;Socs2
mmu04630	Jak-STAT signaling pathway	3	Il10rb;Jak2;Stat5a;Socs5
mmu04630	Jak-STAT signaling pathway	3	Il10rb;Jak2;Stat5a;Socs7
mmu04630	Jak-STAT signaling pathway	3	Il22ra1;Jak2;Pik3ca;Akt2
mmu04630	Jak-STAT signaling pathway	3	Il22ra1;Jak2;Pik3ca;Akt3
mmu04630	Jak-STAT signaling pathway	3	Il22ra1;Jak2;Pik3cb;Akt1
mmu04630	Jak-STAT signaling pathway	3	Il22ra1;Jak2;Stat5a;Ccnd1
mmu04630	Jak-STAT signaling pathway	3	Il22ra1;Jak2;Stat5a;Ccnd3
mmu04630	Jak-STAT signaling pathway	3	Il22ra1;Jak2;Stat5a;Myc
mmu04630	Jak-STAT signaling pathway	3	Il22ra1;Jak2;Stat5a;Pim1
mmu04630	Jak-STAT signaling pathway	3	Il22ra1;Jak2;Stat5a;Socs1
mmu04630	Jak-STAT signaling pathway	3	Il22ra1;Jak2;Stat5a;Socs2
mmu04630	Jak-STAT signaling pathway	3	Il22ra1;Jak2;Stat5a;Socs5
mmu04630	Jak-STAT signaling pathway	3	Il22ra1;Jak2;Stat5a;Socs7
mmu04630	Jak-STAT signaling pathway	3	Pias1;Stat5a;Socs4;Il2rb
mmu04630	Jak-STAT signaling pathway	3	Pias1;Stat5a;Socs4;Tyk2
mmu04630	Jak-STAT signaling pathway	3	Il12rb1;Jak2;Pik3ca;Akt2
mmu04630	Jak-STAT signaling pathway	3	Il12rb1;Jak2;Pik3ca;Akt3
mmu04630	Jak-STAT signaling pathway	3	Il12rb1;Jak2;Pik3cb;Akt1
mmu04630	Jak-STAT signaling pathway	3	Il12rb1;Jak2;Stat5a;Ccnd1
mmu04630	Jak-STAT signaling pathway	3	Il12rb1;Jak2;Stat5a;Ccnd3
mmu04630	Jak-STAT signaling pathway	3	Il12rb1;Jak2;Stat5a;Myc
mmu04630	Jak-STAT signaling pathway	3	Il12rb1;Jak2;Stat5a;Pim1
mmu04630	Jak-STAT signaling pathway	3	Il12rb1;Jak2;Stat5a;Socs1
mmu04630	Jak-STAT signaling pathway	3	Il12rb1;Jak2;Stat5a;Socs2
mmu04630	Jak-STAT signaling pathway	3	Il12rb1;Jak2;Stat5a;Socs5
mmu04630	Jak-STAT signaling pathway	3	Il12rb1;Jak2;Stat5a;Socs7
mmu04630	Jak-STAT signaling pathway	3	Gm13305;Jak2;Pik3ca;Akt2
mmu04630	Jak-STAT signaling pathway	3	Gm13305;Jak2;Pik3ca;Akt3
mmu04630	Jak-STAT signaling pathway	3	Gm13305;Jak2;Pik3cb;Akt1
mmu04630	Jak-STAT signaling pathway	3	Gm13305;Jak2;Stat5a;Ccnd1
mmu04630	Jak-STAT signaling pathway	3	Gm13305;Jak2;Stat5a;Ccnd3
mmu04630	Jak-STAT signaling pathway	3	Gm13305;Jak2;Stat5a;Myc
mmu04630	Jak-STAT signaling pathway	3	Gm13305;Jak2;Stat5a;Pim1
mmu04630	Jak-STAT signaling pathway	3	Gm13305;Jak2;Stat5a;Socs1
mmu04630	Jak-STAT signaling pathway	3	Gm13305;Jak2;Stat5a;Socs2
mmu04630	Jak-STAT signaling pathway	3	Gm13305;Jak2;Stat5a;Socs5
mmu04630	Jak-STAT signaling pathway	3	Gm13305;Jak2;Stat5a;Socs7
mmu04630	Jak-STAT signaling pathway	3	Lifr;Jak2;Pik3ca;Akt2
mmu04630	Jak-STAT signaling pathway	3	Lifr;Jak2;Pik3ca;Akt3
mmu04630	Jak-STAT signaling pathway	3	Lifr;Jak2;Pik3cb;Akt1
mmu04630	Jak-STAT signaling pathway	3	Lifr;Jak2;Stat5a;Ccnd1
mmu04630	Jak-STAT signaling pathway	3	Lifr;Jak2;Stat5a;Ccnd3
mmu04630	Jak-STAT signaling pathway	3	Lifr;Jak2;Stat5a;Myc
mmu04630	Jak-STAT signaling pathway	3	Lifr;Jak2;Stat5a;Pim1
mmu04630	Jak-STAT signaling pathway	3	Lifr;Jak2;Stat5a;Socs1
mmu04630	Jak-STAT signaling pathway	3	Lifr;Jak2;Stat5a;Socs2
mmu04630	Jak-STAT signaling pathway	3	Lifr;Jak2;Stat5a;Socs5
mmu04630	Jak-STAT signaling pathway	3	Lifr;Jak2;Stat5a;Socs7
mmu04630	Jak-STAT signaling pathway	3	Il7r;Jak2;Pik3ca;Akt2
mmu04630	Jak-STAT signaling pathway	3	Il7r;Jak2;Pik3ca;Akt3
mmu04630	Jak-STAT signaling pathway	3	Il7r;Jak2;Pik3cb;Akt1
mmu04630	Jak-STAT signaling pathway	3	Il7r;Jak2;Stat5a;Ccnd1
mmu04630	Jak-STAT signaling pathway	3	Il7r;Jak2;Stat5a;Ccnd3
mmu04630	Jak-STAT signaling pathway	3	Il7r;Jak2;Stat5a;Myc
mmu04630	Jak-STAT signaling pathway	3	Il7r;Jak2;Stat5a;Pim1
mmu04630	Jak-STAT signaling pathway	3	Il7r;Jak2;Stat5a;Socs1
mmu04630	Jak-STAT signaling pathway	3	Il7r;Jak2;Stat5a;Socs2
mmu04630	Jak-STAT signaling pathway	3	Il7r;Jak2;Stat5a;Socs5
mmu04630	Jak-STAT signaling pathway	3	Il7r;Jak2;Stat5a;Socs7
mmu04630	Jak-STAT signaling pathway	3	Gm2002;Jak2;Pik3ca;Akt2
mmu04630	Jak-STAT signaling pathway	3	Gm2002;Jak2;Pik3ca;Akt3
mmu04630	Jak-STAT signaling pathway	3	Gm2002;Jak2;Pik3cb;Akt1
mmu04630	Jak-STAT signaling pathway	3	Gm2002;Jak2;Stat5a;Ccnd1
mmu04630	Jak-STAT signaling pathway	3	Gm2002;Jak2;Stat5a;Ccnd3
mmu04630	Jak-STAT signaling pathway	3	Gm2002;Jak2;Stat5a;Myc
mmu04630	Jak-STAT signaling pathway	3	Gm2002;Jak2;Stat5a;Pim1
mmu04630	Jak-STAT signaling pathway	3	Gm2002;Jak2;Stat5a;Socs1
mmu04630	Jak-STAT signaling pathway	3	Gm2002;Jak2;Stat5a;Socs2
mmu04630	Jak-STAT signaling pathway	3	Gm2002;Jak2;Stat5a;Socs5
mmu04630	Jak-STAT signaling pathway	3	Gm2002;Jak2;Stat5a;Socs7
mmu04630	Jak-STAT signaling pathway	3	Ifnar2;Jak2;Pik3ca;Akt2
mmu04630	Jak-STAT signaling pathway	3	Ifnar2;Jak2;Pik3ca;Akt3
mmu04630	Jak-STAT signaling pathway	3	Ifnar2;Jak2;Pik3cb;Akt1
mmu04630	Jak-STAT signaling pathway	3	Ifnar2;Jak2;Stat5a;Ccnd1
mmu04630	Jak-STAT signaling pathway	3	Ifnar2;Jak2;Stat5a;Ccnd3
mmu04630	Jak-STAT signaling pathway	3	Ifnar2;Jak2;Stat5a;Myc
mmu04630	Jak-STAT signaling pathway	3	Ifnar2;Jak2;Stat5a;Pim1
mmu04630	Jak-STAT signaling pathway	3	Ifnar2;Jak2;Stat5a;Socs1
mmu04630	Jak-STAT signaling pathway	3	Ifnar2;Jak2;Stat5a;Socs2
mmu04630	Jak-STAT signaling pathway	3	Ifnar2;Jak2;Stat5a;Socs5
mmu04630	Jak-STAT signaling pathway	3	Ifnar2;Jak2;Stat5a;Socs7
mmu04630	Jak-STAT signaling pathway	3	Pias4;Stat5a;Socs4;Il2rb
mmu04630	Jak-STAT signaling pathway	3	Pias4;Stat5a;Socs4;Tyk2
mmu04630	Jak-STAT signaling pathway	3	CT868723.4;Jak2;Pik3ca;Akt2
mmu04630	Jak-STAT signaling pathway	3	CT868723.4;Jak2;Pik3ca;Akt3
mmu04630	Jak-STAT signaling pathway	3	CT868723.4;Jak2;Pik3cb;Akt1
mmu04630	Jak-STAT signaling pathway	3	CT868723.4;Jak2;Stat5a;Ccnd1
mmu04630	Jak-STAT signaling pathway	3	CT868723.4;Jak2;Stat5a;Ccnd3
mmu04630	Jak-STAT signaling pathway	3	CT868723.4;Jak2;Stat5a;Myc
mmu04630	Jak-STAT signaling pathway	3	CT868723.4;Jak2;Stat5a;Pim1
mmu04630	Jak-STAT signaling pathway	3	CT868723.4;Jak2;Stat5a;Socs1
mmu04630	Jak-STAT signaling pathway	3	CT868723.4;Jak2;Stat5a;Socs2
mmu04630	Jak-STAT signaling pathway	3	CT868723.4;Jak2;Stat5a;Socs5
mmu04630	Jak-STAT signaling pathway	3	CT868723.4;Jak2;Stat5a;Socs7
mmu04630	Jak-STAT signaling pathway	3	Il15ra;Jak2;Pik3ca;Akt2
mmu04630	Jak-STAT signaling pathway	3	Il15ra;Jak2;Pik3ca;Akt3
mmu04630	Jak-STAT signaling pathway	3	Il15ra;Jak2;Pik3cb;Akt1
mmu04630	Jak-STAT signaling pathway	3	Il15ra;Jak2;Stat5a;Ccnd1
mmu04630	Jak-STAT signaling pathway	3	Il15ra;Jak2;Stat5a;Ccnd3
mmu04630	Jak-STAT signaling pathway	3	Il15ra;Jak2;Stat5a;Myc
mmu04630	Jak-STAT signaling pathway	3	Il15ra;Jak2;Stat5a;Pim1
mmu04630	Jak-STAT signaling pathway	3	Il15ra;Jak2;Stat5a;Socs1
mmu04630	Jak-STAT signaling pathway	3	Il15ra;Jak2;Stat5a;Socs2
mmu04630	Jak-STAT signaling pathway	3	Il15ra;Jak2;Stat5a;Socs5
mmu04630	Jak-STAT signaling pathway	3	Il15ra;Jak2;Stat5a;Socs7
mmu04630	Jak-STAT signaling pathway	3	Il20ra;Jak2;Pik3ca;Akt2
mmu04630	Jak-STAT signaling pathway	3	Il20ra;Jak2;Pik3ca;Akt3
mmu04630	Jak-STAT signaling pathway	3	Il20ra;Jak2;Pik3cb;Akt1
mmu04630	Jak-STAT signaling pathway	3	Il20ra;Jak2;Stat5a;Ccnd1
mmu04630	Jak-STAT signaling pathway	3	Il20ra;Jak2;Stat5a;Ccnd3
mmu04630	Jak-STAT signaling pathway	3	Il20ra;Jak2;Stat5a;Myc
mmu04630	Jak-STAT signaling pathway	3	Il20ra;Jak2;Stat5a;Pim1
mmu04630	Jak-STAT signaling pathway	3	Il20ra;Jak2;Stat5a;Socs1
mmu04630	Jak-STAT signaling pathway	3	Il20ra;Jak2;Stat5a;Socs2
mmu04630	Jak-STAT signaling pathway	3	Il20ra;Jak2;Stat5a;Socs5
mmu04630	Jak-STAT signaling pathway	3	Il20ra;Jak2;Stat5a;Socs7
mmu04630	Jak-STAT signaling pathway	3	Il2ra;Jak2;Pik3ca;Akt2
mmu04630	Jak-STAT signaling pathway	3	Il2ra;Jak2;Pik3ca;Akt3
mmu04630	Jak-STAT signaling pathway	3	Il2ra;Jak2;Pik3cb;Akt1
mmu04630	Jak-STAT signaling pathway	3	Il2ra;Jak2;Stat5a;Ccnd1
mmu04630	Jak-STAT signaling pathway	3	Il2ra;Jak2;Stat5a;Ccnd3
mmu04630	Jak-STAT signaling pathway	3	Il2ra;Jak2;Stat5a;Myc
mmu04630	Jak-STAT signaling pathway	3	Il2ra;Jak2;Stat5a;Pim1
mmu04630	Jak-STAT signaling pathway	3	Il2ra;Jak2;Stat5a;Socs1
mmu04630	Jak-STAT signaling pathway	3	Il2ra;Jak2;Stat5a;Socs2
mmu04630	Jak-STAT signaling pathway	3	Il2ra;Jak2;Stat5a;Socs5
mmu04630	Jak-STAT signaling pathway	3	Il2ra;Jak2;Stat5a;Socs7
mmu04630	Jak-STAT signaling pathway	3	Il13ra2;Jak2;Pik3ca;Akt2
mmu04630	Jak-STAT signaling pathway	3	Il13ra2;Jak2;Pik3ca;Akt3
mmu04630	Jak-STAT signaling pathway	3	Il13ra2;Jak2;Pik3cb;Akt1
mmu04630	Jak-STAT signaling pathway	3	Il13ra2;Jak2;Stat5a;Ccnd1
mmu04630	Jak-STAT signaling pathway	3	Il13ra2;Jak2;Stat5a;Ccnd3
mmu04630	Jak-STAT signaling pathway	3	Il13ra2;Jak2;Stat5a;Myc
mmu04630	Jak-STAT signaling pathway	3	Il13ra2;Jak2;Stat5a;Pim1
mmu04630	Jak-STAT signaling pathway	3	Il13ra2;Jak2;Stat5a;Socs1
mmu04630	Jak-STAT signaling pathway	3	Il13ra2;Jak2;Stat5a;Socs2
mmu04630	Jak-STAT signaling pathway	3	Il13ra2;Jak2;Stat5a;Socs5
mmu04630	Jak-STAT signaling pathway	3	Il13ra2;Jak2;Stat5a;Socs7
mmu04630	Jak-STAT signaling pathway	3	CR974586.2;Jak2;Pik3ca;Akt2
mmu04630	Jak-STAT signaling pathway	3	CR974586.2;Jak2;Pik3ca;Akt3
mmu04630	Jak-STAT signaling pathway	3	CR974586.2;Jak2;Pik3cb;Akt1
mmu04630	Jak-STAT signaling pathway	3	CR974586.2;Jak2;Stat5a;Ccnd1
mmu04630	Jak-STAT signaling pathway	3	CR974586.2;Jak2;Stat5a;Ccnd3
mmu04630	Jak-STAT signaling pathway	3	CR974586.2;Jak2;Stat5a;Myc
mmu04630	Jak-STAT signaling pathway	3	CR974586.2;Jak2;Stat5a;Pim1
mmu04630	Jak-STAT signaling pathway	3	CR974586.2;Jak2;Stat5a;Socs1
mmu04630	Jak-STAT signaling pathway	3	CR974586.2;Jak2;Stat5a;Socs2
mmu04630	Jak-STAT signaling pathway	3	CR974586.2;Jak2;Stat5a;Socs5
mmu04630	Jak-STAT signaling pathway	3	CR974586.2;Jak2;Stat5a;Socs7
mmu04630	Jak-STAT signaling pathway	3	Il22ra2;Jak2;Pik3ca;Akt2
mmu04630	Jak-STAT signaling pathway	3	Il22ra2;Jak2;Pik3ca;Akt3
mmu04630	Jak-STAT signaling pathway	3	Il22ra2;Jak2;Pik3cb;Akt1
mmu04630	Jak-STAT signaling pathway	3	Il22ra2;Jak2;Stat5a;Ccnd1
mmu04630	Jak-STAT signaling pathway	3	Il22ra2;Jak2;Stat5a;Ccnd3
mmu04630	Jak-STAT signaling pathway	3	Il22ra2;Jak2;Stat5a;Myc
mmu04630	Jak-STAT signaling pathway	3	Il22ra2;Jak2;Stat5a;Pim1
mmu04630	Jak-STAT signaling pathway	3	Il22ra2;Jak2;Stat5a;Socs1
mmu04630	Jak-STAT signaling pathway	3	Il22ra2;Jak2;Stat5a;Socs2
mmu04630	Jak-STAT signaling pathway	3	Il22ra2;Jak2;Stat5a;Socs5
mmu04630	Jak-STAT signaling pathway	3	Il22ra2;Jak2;Stat5a;Socs7
mmu04630	Jak-STAT signaling pathway	3	Il11ra1;Jak2;Pik3ca;Akt2
mmu04630	Jak-STAT signaling pathway	3	Il11ra1;Jak2;Pik3ca;Akt3
mmu04630	Jak-STAT signaling pathway	3	Il11ra1;Jak2;Pik3cb;Akt1
mmu04630	Jak-STAT signaling pathway	3	Il11ra1;Jak2;Stat5a;Ccnd1
mmu04630	Jak-STAT signaling pathway	3	Il11ra1;Jak2;Stat5a;Ccnd3
mmu04630	Jak-STAT signaling pathway	3	Il11ra1;Jak2;Stat5a;Myc
mmu04630	Jak-STAT signaling pathway	3	Il11ra1;Jak2;Stat5a;Pim1
mmu04630	Jak-STAT signaling pathway	3	Il11ra1;Jak2;Stat5a;Socs1
mmu04630	Jak-STAT signaling pathway	3	Il11ra1;Jak2;Stat5a;Socs2
mmu04630	Jak-STAT signaling pathway	3	Il11ra1;Jak2;Stat5a;Socs5
mmu04630	Jak-STAT signaling pathway	3	Il11ra1;Jak2;Stat5a;Socs7
mmu04630	Jak-STAT signaling pathway	3	Socs5;Jak2;Pik3ca;Akt2
mmu04630	Jak-STAT signaling pathway	3	Socs5;Jak2;Pik3ca;Akt3
mmu04630	Jak-STAT signaling pathway	3	Socs5;Jak2;Pik3cb;Akt1
mmu04630	Jak-STAT signaling pathway	3	Socs5;Jak2;Stat5a;Ccnd1
mmu04630	Jak-STAT signaling pathway	3	Socs5;Jak2;Stat5a;Ccnd3
mmu04630	Jak-STAT signaling pathway	3	Socs5;Jak2;Stat5a;Myc
mmu04630	Jak-STAT signaling pathway	3	Socs5;Jak2;Stat5a;Pim1
mmu04630	Jak-STAT signaling pathway	3	Socs5;Jak2;Stat5a;Socs1
mmu04630	Jak-STAT signaling pathway	3	Socs5;Jak2;Stat5a;Socs2
mmu04630	Jak-STAT signaling pathway	3	Socs5;Jak2;Stat5a;Socs7
mmu04630	Jak-STAT signaling pathway	3	Il13ra1;Jak2;Pik3ca;Akt2
mmu04630	Jak-STAT signaling pathway	3	Il13ra1;Jak2;Pik3ca;Akt3
mmu04630	Jak-STAT signaling pathway	3	Il13ra1;Jak2;Pik3cb;Akt1
mmu04630	Jak-STAT signaling pathway	3	Il13ra1;Jak2;Stat5a;Ccnd1
mmu04630	Jak-STAT signaling pathway	3	Il13ra1;Jak2;Stat5a;Ccnd3
mmu04630	Jak-STAT signaling pathway	3	Il13ra1;Jak2;Stat5a;Myc
mmu04630	Jak-STAT signaling pathway	3	Il13ra1;Jak2;Stat5a;Pim1
mmu04630	Jak-STAT signaling pathway	3	Il13ra1;Jak2;Stat5a;Socs1
mmu04630	Jak-STAT signaling pathway	3	Il13ra1;Jak2;Stat5a;Socs2
mmu04630	Jak-STAT signaling pathway	3	Il13ra1;Jak2;Stat5a;Socs5
mmu04630	Jak-STAT signaling pathway	3	Il13ra1;Jak2;Stat5a;Socs7
mmu04630	Jak-STAT signaling pathway	3	Socs2;Jak2;Stat5a;Ccnd1
mmu04630	Jak-STAT signaling pathway	3	Socs2;Jak2;Stat5a;Ccnd3
mmu04630	Jak-STAT signaling pathway	3	Socs2;Jak2;Stat5a;Myc
mmu04630	Jak-STAT signaling pathway	3	Socs2;Jak2;Stat5a;Pim1
mmu04630	Jak-STAT signaling pathway	3	Socs2;Jak2;Stat5a;Socs1
mmu04630	Jak-STAT signaling pathway	3	Socs2;Jak2;Stat5a;Socs5
mmu04630	Jak-STAT signaling pathway	3	Socs2;Jak2;Stat5a;Socs7
mmu04630	Jak-STAT signaling pathway	3	Il21r;Jak2;Pik3ca;Akt2
mmu04630	Jak-STAT signaling pathway	3	Il21r;Jak2;Pik3ca;Akt3
mmu04630	Jak-STAT signaling pathway	3	Il21r;Jak2;Pik3cb;Akt1
mmu04630	Jak-STAT signaling pathway	3	Il21r;Jak2;Stat5a;Ccnd1
mmu04630	Jak-STAT signaling pathway	3	Il21r;Jak2;Stat5a;Ccnd3
mmu04630	Jak-STAT signaling pathway	3	Il21r;Jak2;Stat5a;Myc
mmu04630	Jak-STAT signaling pathway	3	Il21r;Jak2;Stat5a;Pim1
mmu04630	Jak-STAT signaling pathway	3	Il21r;Jak2;Stat5a;Socs1
mmu04630	Jak-STAT signaling pathway	3	Il21r;Jak2;Stat5a;Socs2
mmu04630	Jak-STAT signaling pathway	3	Il21r;Jak2;Stat5a;Socs5
mmu04630	Jak-STAT signaling pathway	3	Il21r;Jak2;Stat5a;Socs7
mmu04630	Jak-STAT signaling pathway	3	Jak3;Stat6;Socs3;CR974586.2
mmu04630	Jak-STAT signaling pathway	3	Jak3;Stat6;Socs3;Crlf2
mmu04630	Jak-STAT signaling pathway	3	Jak3;Stat6;Socs3;Csf2rb
mmu04630	Jak-STAT signaling pathway	3	Jak3;Stat6;Socs3;Csf2rb2
mmu04630	Jak-STAT signaling pathway	3	Jak3;Stat6;Socs3;CT868723.4
mmu04630	Jak-STAT signaling pathway	3	Jak3;Stat6;Socs3;Gm13305
mmu04630	Jak-STAT signaling pathway	3	Jak3;Stat6;Socs3;Gm2002
mmu04630	Jak-STAT signaling pathway	3	Jak3;Stat6;Socs3;Ifnar1
mmu04630	Jak-STAT signaling pathway	3	Jak3;Stat6;Socs3;Ifnar2
mmu04630	Jak-STAT signaling pathway	3	Jak3;Stat6;Socs3;Ifngr1
mmu04630	Jak-STAT signaling pathway	3	Jak3;Stat6;Socs3;Ifngr2
mmu04630	Jak-STAT signaling pathway	3	Jak3;Stat6;Socs3;Il10rb
mmu04630	Jak-STAT signaling pathway	3	Jak3;Stat6;Socs3;Il11ra1
mmu04630	Jak-STAT signaling pathway	3	Jak3;Stat6;Socs3;Il12rb1
mmu04630	Jak-STAT signaling pathway	3	Jak3;Stat6;Socs3;Il13ra1
mmu04630	Jak-STAT signaling pathway	3	Jak3;Stat6;Socs3;Il13ra2
mmu04630	Jak-STAT signaling pathway	3	Jak3;Stat6;Socs3;Il15ra
mmu04630	Jak-STAT signaling pathway	3	Jak3;Stat6;Socs3;Il20ra
mmu04630	Jak-STAT signaling pathway	3	Jak3;Stat6;Socs3;Il21r
mmu04630	Jak-STAT signaling pathway	3	Jak3;Stat6;Socs3;Il22ra1
mmu04630	Jak-STAT signaling pathway	3	Jak3;Stat6;Socs3;Il22ra2
mmu04630	Jak-STAT signaling pathway	3	Jak3;Stat6;Socs3;Il28ra
mmu04630	Jak-STAT signaling pathway	3	Jak3;Stat6;Socs3;Il2ra
mmu04630	Jak-STAT signaling pathway	3	Jak3;Stat6;Socs3;Il2rg
mmu04630	Jak-STAT signaling pathway	3	Jak3;Stat6;Socs3;Il3ra
mmu04630	Jak-STAT signaling pathway	3	Jak3;Stat6;Socs3;Il4ra
mmu04630	Jak-STAT signaling pathway	3	Jak3;Stat6;Socs3;Il6ra
mmu04630	Jak-STAT signaling pathway	3	Jak3;Stat6;Socs3;Il7r
mmu04630	Jak-STAT signaling pathway	3	Jak3;Stat6;Socs3;Il9r
mmu04630	Jak-STAT signaling pathway	3	Jak3;Stat6;Socs3;Lifr
mmu04630	Jak-STAT signaling pathway	3	Cish;Stat5a;Socs4;Il2rb
mmu04630	Jak-STAT signaling pathway	3	Cish;Stat5a;Socs4;Tyk2
mmu04630	Jak-STAT signaling pathway	3	Pias2;Stat5a;Socs4;Il2rb
mmu04630	Jak-STAT signaling pathway	3	Pias2;Stat5a;Socs4;Tyk2
mmu04630	Jak-STAT signaling pathway	3	Socs7;Jak2;Pik3ca;Akt2
mmu04630	Jak-STAT signaling pathway	3	Socs7;Jak2;Pik3ca;Akt3
mmu04630	Jak-STAT signaling pathway	3	Socs7;Jak2;Pik3cb;Akt1
mmu04630	Jak-STAT signaling pathway	3	Socs7;Jak2;Stat5a;Ccnd1
mmu04630	Jak-STAT signaling pathway	3	Socs7;Jak2;Stat5a;Ccnd3
mmu04630	Jak-STAT signaling pathway	3	Socs7;Jak2;Stat5a;Myc
mmu04630	Jak-STAT signaling pathway	3	Socs7;Jak2;Stat5a;Pim1
mmu04630	Jak-STAT signaling pathway	3	Socs7;Jak2;Stat5a;Socs1
mmu04630	Jak-STAT signaling pathway	3	Socs7;Jak2;Stat5a;Socs2
mmu04630	Jak-STAT signaling pathway	3	Socs7;Jak2;Stat5a;Socs5
mmu04630	Jak-STAT signaling pathway	3	Pias3;Stat5a;Socs4;Il2rb
mmu04630	Jak-STAT signaling pathway	3	Pias3;Stat5a;Socs4;Tyk2
mmu04630	Jak-STAT signaling pathway	3	Cbl;Jak2;Pik3ca;Akt2
mmu04630	Jak-STAT signaling pathway	3	Cbl;Jak2;Pik3ca;Akt3
mmu04630	Jak-STAT signaling pathway	3	Cbl;Jak2;Pik3cb;Akt1
mmu04630	Jak-STAT signaling pathway	3	Cbl;Jak2;Stat5a;Ccnd1
mmu04630	Jak-STAT signaling pathway	3	Cbl;Jak2;Stat5a;Ccnd3
mmu04630	Jak-STAT signaling pathway	3	Cbl;Jak2;Stat5a;Myc
mmu04630	Jak-STAT signaling pathway	3	Cbl;Jak2;Stat5a;Pim1
mmu04630	Jak-STAT signaling pathway	3	Cbl;Jak2;Stat5a;Socs1
mmu04630	Jak-STAT signaling pathway	3	Cbl;Jak2;Stat5a;Socs2
mmu04630	Jak-STAT signaling pathway	3	Cbl;Jak2;Stat5a;Socs5
mmu04630	Jak-STAT signaling pathway	3	Cbl;Jak2;Stat5a;Socs7
mmu04630	Jak-STAT signaling pathway	3	Il6ra;Jak2;Pik3ca;Akt2
mmu04630	Jak-STAT signaling pathway	3	Il6ra;Jak2;Pik3ca;Akt3
mmu04630	Jak-STAT signaling pathway	3	Il6ra;Jak2;Pik3cb;Akt1
mmu04630	Jak-STAT signaling pathway	3	Il6ra;Jak2;Stat5a;Ccnd1
mmu04630	Jak-STAT signaling pathway	3	Il6ra;Jak2;Stat5a;Ccnd3
mmu04630	Jak-STAT signaling pathway	3	Il6ra;Jak2;Stat5a;Myc
mmu04630	Jak-STAT signaling pathway	3	Il6ra;Jak2;Stat5a;Pim1
mmu04630	Jak-STAT signaling pathway	3	Il6ra;Jak2;Stat5a;Socs1
mmu04630	Jak-STAT signaling pathway	3	Il6ra;Jak2;Stat5a;Socs2
mmu04630	Jak-STAT signaling pathway	3	Il6ra;Jak2;Stat5a;Socs5
mmu04630	Jak-STAT signaling pathway	3	Il6ra;Jak2;Stat5a;Socs7
mmu04630	Jak-STAT signaling pathway	3	Socs4;Il2rb;Jak2;Pik3cd
mmu04630	Jak-STAT signaling pathway	3	Socs4;Il2rb;Jak2;Pik3cg
mmu04630	Jak-STAT signaling pathway	3	Socs4;Il2rb;Jak2;Pik3r2
mmu04630	Jak-STAT signaling pathway	3	Socs4;Il2rb;Jak2;Pik3r3
mmu04630	Jak-STAT signaling pathway	3	Socs4;Il2rb;Jak2;Pik3r5
mmu04630	Jak-STAT signaling pathway	3	Socs4;Il2rb;Jak2;Stat6
mmu04630	Jak-STAT signaling pathway	3	Il10ra;Jak2;Pik3ca;Akt2
mmu04630	Jak-STAT signaling pathway	3	Il10ra;Jak2;Pik3ca;Akt3
mmu04630	Jak-STAT signaling pathway	3	Il10ra;Jak2;Pik3cb;Akt1
mmu04630	Jak-STAT signaling pathway	3	Il10ra;Jak2;Stat5a;Ccnd1
mmu04630	Jak-STAT signaling pathway	3	Il10ra;Jak2;Stat5a;Ccnd3
mmu04630	Jak-STAT signaling pathway	3	Il10ra;Jak2;Stat5a;Myc
mmu04630	Jak-STAT signaling pathway	3	Il10ra;Jak2;Stat5a;Pim1
mmu04630	Jak-STAT signaling pathway	3	Il10ra;Jak2;Stat5a;Socs1
mmu04630	Jak-STAT signaling pathway	3	Il10ra;Jak2;Stat5a;Socs2
mmu04630	Jak-STAT signaling pathway	3	Il10ra;Jak2;Stat5a;Socs5
mmu04630	Jak-STAT signaling pathway	3	Il10ra;Jak2;Stat5a;Socs7
mmu04630	Jak-STAT signaling pathway	3	Il28ra;Jak2;Pik3ca;Akt2
mmu04630	Jak-STAT signaling pathway	3	Il28ra;Jak2;Pik3ca;Akt3
mmu04630	Jak-STAT signaling pathway	3	Il28ra;Jak2;Pik3cb;Akt1
mmu04630	Jak-STAT signaling pathway	3	Il28ra;Jak2;Stat5a;Ccnd1
mmu04630	Jak-STAT signaling pathway	3	Il28ra;Jak2;Stat5a;Ccnd3
mmu04630	Jak-STAT signaling pathway	3	Il28ra;Jak2;Stat5a;Myc
mmu04630	Jak-STAT signaling pathway	3	Il28ra;Jak2;Stat5a;Pim1
mmu04630	Jak-STAT signaling pathway	3	Il28ra;Jak2;Stat5a;Socs1
mmu04630	Jak-STAT signaling pathway	3	Il28ra;Jak2;Stat5a;Socs2
mmu04630	Jak-STAT signaling pathway	3	Il28ra;Jak2;Stat5a;Socs5
mmu04630	Jak-STAT signaling pathway	3	Il28ra;Jak2;Stat5a;Socs7
mmu04630	Jak-STAT signaling pathway	3	Ifnar1;Jak2;Pik3ca;Akt2
mmu04630	Jak-STAT signaling pathway	3	Ifnar1;Jak2;Pik3ca;Akt3
mmu04630	Jak-STAT signaling pathway	3	Ifnar1;Jak2;Pik3cb;Akt1
mmu04630	Jak-STAT signaling pathway	3	Ifnar1;Jak2;Stat5a;Ccnd1
mmu04630	Jak-STAT signaling pathway	3	Ifnar1;Jak2;Stat5a;Ccnd3
mmu04630	Jak-STAT signaling pathway	3	Ifnar1;Jak2;Stat5a;Myc
mmu04630	Jak-STAT signaling pathway	3	Ifnar1;Jak2;Stat5a;Pim1
mmu04630	Jak-STAT signaling pathway	3	Ifnar1;Jak2;Stat5a;Socs1
mmu04630	Jak-STAT signaling pathway	3	Ifnar1;Jak2;Stat5a;Socs2
mmu04630	Jak-STAT signaling pathway	3	Ifnar1;Jak2;Stat5a;Socs5
mmu04630	Jak-STAT signaling pathway	3	Ifnar1;Jak2;Stat5a;Socs7
mmu04630	Jak-STAT signaling pathway	3	Il9r;Jak2;Pik3ca;Akt2
mmu04630	Jak-STAT signaling pathway	3	Il9r;Jak2;Pik3ca;Akt3
mmu04630	Jak-STAT signaling pathway	3	Il9r;Jak2;Pik3cb;Akt1
mmu04630	Jak-STAT signaling pathway	3	Il9r;Jak2;Stat5a;Ccnd1
mmu04630	Jak-STAT signaling pathway	3	Il9r;Jak2;Stat5a;Ccnd3
mmu04630	Jak-STAT signaling pathway	3	Il9r;Jak2;Stat5a;Myc
mmu04630	Jak-STAT signaling pathway	3	Il9r;Jak2;Stat5a;Pim1
mmu04630	Jak-STAT signaling pathway	3	Il9r;Jak2;Stat5a;Socs1
mmu04630	Jak-STAT signaling pathway	3	Il9r;Jak2;Stat5a;Socs2
mmu04630	Jak-STAT signaling pathway	3	Il9r;Jak2;Stat5a;Socs5
mmu04630	Jak-STAT signaling pathway	3	Il9r;Jak2;Stat5a;Socs7
mmu04912	GnRH signaling pathway	3	Prkcb;Src;Cdc42;Map3k1
mmu05152	Tuberculosis	3	Card9;Card9-Malt1-Bcl10;Nfkb1;Cebpg
mmu05152	Tuberculosis	3	Card9;Card9-Malt1-Bcl10;Nfkb1;Il18
mmu05152	Tuberculosis	3	Card9;Card9-Malt1-Bcl10;Nfkb1;Il23a
mmu05152	Tuberculosis	3	Bcl10;Card9-Malt1-Bcl10;Nfkb1;Cebpg
mmu05152	Tuberculosis	3	Bcl10;Card9-Malt1-Bcl10;Nfkb1;Il18
mmu05152	Tuberculosis	3	Bcl10;Card9-Malt1-Bcl10;Nfkb1;Il23a
mmu05152	Tuberculosis	3	Malt1;Card9-Malt1-Bcl10;Nfkb1;Cebpg
mmu05152	Tuberculosis	3	Malt1;Card9-Malt1-Bcl10;Nfkb1;Il18
mmu05152	Tuberculosis	3	Malt1;Card9-Malt1-Bcl10;Nfkb1;Il23a
mmu03320	PPAR signaling pathway	2	Ppara;Ppara-Rxra;Acsl1
mmu03320	PPAR signaling pathway	2	Ppara;Ppara-Rxra;Dbi
mmu03320	PPAR signaling pathway	2	Ppard;Ppard-Rxra;Fabp3
mmu04010	MAPK signaling pathway	2	Mapk13;Mapkapk2;Atf4
mmu04010	MAPK signaling pathway	2	Mapk13;Mapkapk2;Hspb1
mmu04010	MAPK signaling pathway	2	Il1a;Il1r2;Tab1
mmu04010	MAPK signaling pathway	2	Il1a;Il1r2;Traf6
mmu04010	MAPK signaling pathway	2	Il1b;Il1r2;Tab1
mmu04010	MAPK signaling pathway	2	Il1b;Il1r2;Traf6
mmu04012	ErbB signaling pathway	2	Hbegf;Egfr-Egfr;Src
mmu04012	ErbB signaling pathway	2	Hbegf;Egfr-Egfr;Stat5a
mmu04012	ErbB signaling pathway	2	Ereg;Erbb4;Stat5b
mmu04012	ErbB signaling pathway	2	Ereg;Erbb4-Erbb4;Pik3r5
mmu04012	ErbB signaling pathway	2	Areg;Egfr-Egfr;Src
mmu04012	ErbB signaling pathway	2	Areg;Egfr-Egfr;Stat5a
mmu04062	Chemokine signaling pathway	2	Ccl3;Ccr2;Gnai2
mmu04062	Chemokine signaling pathway	2	Ccl3;Ccr5;Gnai3
mmu04062	Chemokine signaling pathway	2	Ccr6;Jak2;Stat1
mmu04062	Chemokine signaling pathway	2	Ccr6;Jak2;Stat2
mmu04062	Chemokine signaling pathway	2	Ccr6;Jak2;Stat3
mmu04062	Chemokine signaling pathway	2	Ccr6;Jak2;Stat5b
mmu04062	Chemokine signaling pathway	2	Ccl22;Ccr2;Gnai2
mmu04062	Chemokine signaling pathway	2	Ccr7;Jak3;Stat5b
mmu04062	Chemokine signaling pathway	2	Ccr5;Jak3;Stat5b
mmu04062	Chemokine signaling pathway	2	Ccl4;Ccr2;Gnai2
mmu04062	Chemokine signaling pathway	2	Ccl4;Ccr5;Gnai3
mmu04064	NF-kappa B signaling pathway	2	Nfkbia;Nfkb1-Rela;Gadd45b
mmu04064	NF-kappa B signaling pathway	2	Rela;Nfkb1-Rela;Gadd45b
mmu04064	NF-kappa B signaling pathway	2	Relb;Relb-Nfkb2;Icam1
mmu04064	NF-kappa B signaling pathway	2	Nfkb1;Nfkb1-Rela;Gadd45b
mmu04110	Cell cycle	2	Gsk3b;Ccnd2;Rbl1
mmu04110	Cell cycle	2	Gsk3b;Ccnd2;Rbl2
mmu04114	Oocyte meiosis	2	Cdk1-Ccnb2;Slk;Plk1
mmu04115	p53 signaling pathway	2	Atm;Trp53;Shisa5
mmu04150	mTOR signaling pathway	2	Ins2;Rps6ka2;Tsc2
mmu04150	mTOR signaling pathway	2	Igf1;Rps6ka2;Tsc2
mmu04150	mTOR signaling pathway	2	Ins1;Rps6ka2;Tsc2
mmu04210	Apoptosis	2	Ntrk1;Pik3r5;Akt1
mmu04210	Apoptosis	2	Ntrk1;Pik3r5;Akt2
mmu04210	Apoptosis	2	Ntrk1;Pik3r5;Akt3
mmu04210	Apoptosis	2	Csf2rb;Pik3r5;Akt1
mmu04210	Apoptosis	2	Csf2rb;Pik3r5;Akt2
mmu04210	Apoptosis	2	Csf2rb;Pik3r5;Akt3
mmu04210	Apoptosis	2	Nfkb1;Xiap;Casp3
mmu04210	Apoptosis	2	Nfkb1;Xiap;Casp7
mmu04210	Apoptosis	2	Il3ra;Pik3r5;Akt1
mmu04210	Apoptosis	2	Il3ra;Pik3r5;Akt2
mmu04210	Apoptosis	2	Il3ra;Pik3r5;Akt3
mmu04210	Apoptosis	2	Csf2rb2;Pik3r5;Akt1
mmu04210	Apoptosis	2	Csf2rb2;Pik3r5;Akt2
mmu04210	Apoptosis	2	Csf2rb2;Pik3r5;Akt3
mmu04330	Notch signaling pathway	2	Adam17;Notch4;Dtx2
mmu04360	Axon guidance	2	Efna2;Epha4;Abl1
mmu04360	Axon guidance	2	Efna2;Epha4;Rasa1
mmu04360	Axon guidance	2	Rhod;Rnd1;Arhgef12
mmu04360	Axon guidance	2	Efna1;Epha4;Abl1
mmu04360	Axon guidance	2	Efna1;Epha4;Rasa1
mmu04360	Axon guidance	2	Efna4;Epha4;Abl1
mmu04360	Axon guidance	2	Efna4;Epha4;Rasa1
mmu04360	Axon guidance	2	Plxnb3;Rnd1;Arhgef12
mmu04360	Axon guidance	2	Efna5;Epha4;Abl1
mmu04360	Axon guidance	2	Efna5;Epha4;Rasa1
mmu04360	Axon guidance	2	Plxna3;Rnd1;Arhgef12
mmu04370	VEGF signaling pathway	2	Mapk12;Mapkapk2;Hspb1
mmu04370	VEGF signaling pathway	2	Mapk13;Mapkapk2;Hspb1
mmu04370	VEGF signaling pathway	2	Mapk11;Mapkapk2;Hspb1
mmu04370	VEGF signaling pathway	2	Kdr;Pik3r5;Rac1
mmu04370	VEGF signaling pathway	2	Kdr;Pik3r5;Rac2
mmu04370	VEGF signaling pathway	2	Kdr;Pik3r5;Rac3
mmu04510	Focal adhesion	2	Itgb4;Src;Arhgap5
mmu04510	Focal adhesion	2	Vegfb;Met;Pik3ca
mmu04510	Focal adhesion	2	Vegfb;Met;Pik3cb
mmu04510	Focal adhesion	2	Vegfb;Met;Pik3cg
mmu04510	Focal adhesion	2	Vegfb;Met;Pik3r2
mmu04510	Focal adhesion	2	Vegfb;Met;Pik3r3
mmu04510	Focal adhesion	2	Vegfb;Met;Pik3r5
mmu04510	Focal adhesion	2	Vegfb;Met;Ptk2
mmu04510	Focal adhesion	2	Vegfb;Met;Shc2
mmu04510	Focal adhesion	2	Vegfb;Met;Shc3
mmu04510	Focal adhesion	2	Vegfb;Met;Shc4
mmu04510	Focal adhesion	2	Egf;Met;Pik3ca
mmu04510	Focal adhesion	2	Egf;Met;Pik3cb
mmu04510	Focal adhesion	2	Egf;Met;Pik3cg
mmu04510	Focal adhesion	2	Egf;Met;Pik3r2
mmu04510	Focal adhesion	2	Egf;Met;Pik3r3
mmu04510	Focal adhesion	2	Egf;Met;Pik3r5
mmu04510	Focal adhesion	2	Egf;Met;Ptk2
mmu04510	Focal adhesion	2	Egf;Met;Shc2
mmu04510	Focal adhesion	2	Egf;Met;Shc3
mmu04510	Focal adhesion	2	Egf;Met;Shc4
mmu04510	Focal adhesion	2	Pgf;Egfr;Pik3r5
mmu04510	Focal adhesion	2	Pgf;Met;Pik3ca
mmu04510	Focal adhesion	2	Pgf;Met;Pik3cb
mmu04510	Focal adhesion	2	Pgf;Met;Pik3cg
mmu04510	Focal adhesion	2	Pgf;Met;Pik3r2
mmu04510	Focal adhesion	2	Pgf;Met;Pik3r3
mmu04510	Focal adhesion	2	Pgf;Met;Ptk2
mmu04510	Focal adhesion	2	Pgf;Met;Shc2
mmu04510	Focal adhesion	2	Pgf;Met;Shc3
mmu04510	Focal adhesion	2	Pgf;Met;Shc4
mmu04510	Focal adhesion	2	Itgb8;Src;Arhgap5
mmu04510	Focal adhesion	2	Vegfa;Met;Pik3ca
mmu04510	Focal adhesion	2	Vegfa;Met;Pik3cb
mmu04510	Focal adhesion	2	Vegfa;Met;Pik3cg
mmu04510	Focal adhesion	2	Vegfa;Met;Pik3r2
mmu04510	Focal adhesion	2	Vegfa;Met;Pik3r3
mmu04510	Focal adhesion	2	Vegfa;Met;Pik3r5
mmu04510	Focal adhesion	2	Vegfa;Met;Ptk2
mmu04510	Focal adhesion	2	Vegfa;Met;Shc2
mmu04510	Focal adhesion	2	Vegfa;Met;Shc3
mmu04510	Focal adhesion	2	Vegfa;Met;Shc4
mmu04510	Focal adhesion	2	Vegfc;Met;Pik3ca
mmu04510	Focal adhesion	2	Vegfc;Met;Pik3cb
mmu04510	Focal adhesion	2	Vegfc;Met;Pik3cg
mmu04510	Focal adhesion	2	Vegfc;Met;Pik3r2
mmu04510	Focal adhesion	2	Vegfc;Met;Pik3r3
mmu04510	Focal adhesion	2	Vegfc;Met;Pik3r5
mmu04510	Focal adhesion	2	Vegfc;Met;Ptk2
mmu04510	Focal adhesion	2	Vegfc;Met;Shc2
mmu04510	Focal adhesion	2	Vegfc;Met;Shc3
mmu04510	Focal adhesion	2	Vegfc;Met;Shc4
mmu04510	Focal adhesion	2	Figf;Met;Pik3ca
mmu04510	Focal adhesion	2	Figf;Met;Pik3cb
mmu04510	Focal adhesion	2	Figf;Met;Pik3cg
mmu04510	Focal adhesion	2	Figf;Met;Pik3r2
mmu04510	Focal adhesion	2	Figf;Met;Pik3r3
mmu04510	Focal adhesion	2	Figf;Met;Pik3r5
mmu04510	Focal adhesion	2	Figf;Met;Ptk2
mmu04510	Focal adhesion	2	Figf;Met;Shc2
mmu04510	Focal adhesion	2	Figf;Met;Shc3
mmu04510	Focal adhesion	2	Figf;Met;Shc4
mmu04510	Focal adhesion	2	Pdgfa;Met;Pik3ca
mmu04510	Focal adhesion	2	Pdgfa;Met;Pik3cb
mmu04510	Focal adhesion	2	Pdgfa;Met;Pik3cg
mmu04510	Focal adhesion	2	Pdgfa;Met;Pik3r2
mmu04510	Focal adhesion	2	Pdgfa;Met;Pik3r3
mmu04510	Focal adhesion	2	Pdgfa;Met;Pik3r5
mmu04510	Focal adhesion	2	Pdgfa;Met;Ptk2
mmu04510	Focal adhesion	2	Pdgfa;Met;Shc2
mmu04510	Focal adhesion	2	Pdgfa;Met;Shc3
mmu04510	Focal adhesion	2	Pdgfa;Met;Shc4
mmu04510	Focal adhesion	2	Itgb1;Src;Arhgap5
mmu04514	Cell adhesion molecules (CAMs)	2	Icam2;Itgb2l-Itgam;Icam1
mmu04514	Cell adhesion molecules (CAMs)	2	Jam3;Itgb2l-Itgam;Icam1
mmu04520	Adherens junction	2	Pvrl1;Src;4930544G11Rik
mmu04520	Adherens junction	2	Pvrl1;Src;Rac1
mmu04520	Adherens junction	2	Pvrl1;Src;Rac2
mmu04520	Adherens junction	2	Pvrl1;Src;Rac3
mmu04520	Adherens junction	2	Pvrl1;Src;Rhoa
mmu04540	Gap junction	2	Prkaca;Gja1;Tuba3a
mmu04540	Gap junction	2	Prkcg;Gja1;Tuba3a
mmu04540	Gap junction	2	Prkg1;Gja1;Tuba3a
mmu04540	Gap junction	2	Prkacb;Gja1;Tuba3a
mmu04540	Gap junction	2	Pdgfra;Src;Map3k2
mmu04540	Gap junction	2	Cdk1;Gja1;Tuba3a
mmu04610	Complement and coagulation cascades	2	F9;F10;F2
mmu04610	Complement and coagulation cascades	2	F2;F9;F10
mmu04621	NOD-like receptor signaling pathway	2	Tnfaip3;Ripk2;Tab2-Map3k7
mmu04621	NOD-like receptor signaling pathway	2	Birc3;Ripk2;Tab2-Map3k7
mmu04621	NOD-like receptor signaling pathway	2	Birc2;Ripk2;Tab2-Map3k7
mmu04630	Jak-STAT signaling pathway	2	Il10rb;Jak2;Pik3cd
mmu04630	Jak-STAT signaling pathway	2	Il10rb;Jak2;Pik3cg
mmu04630	Jak-STAT signaling pathway	2	Il10rb;Jak2;Pik3r2
mmu04630	Jak-STAT signaling pathway	2	Il10rb;Jak2;Pik3r3
mmu04630	Jak-STAT signaling pathway	2	Il10rb;Jak2;Pik3r5
mmu04630	Jak-STAT signaling pathway	2	Il10rb;Jak2;Stat6
mmu04630	Jak-STAT signaling pathway	2	Stat1;Socs3;CR974586.2
mmu04630	Jak-STAT signaling pathway	2	Stat1;Socs3;Crlf2
mmu04630	Jak-STAT signaling pathway	2	Stat1;Socs3;Csf2rb
mmu04630	Jak-STAT signaling pathway	2	Stat1;Socs3;Csf2rb2
mmu04630	Jak-STAT signaling pathway	2	Stat1;Socs3;CT868723.4
mmu04630	Jak-STAT signaling pathway	2	Stat1;Socs3;Gm13305
mmu04630	Jak-STAT signaling pathway	2	Stat1;Socs3;Gm2002
mmu04630	Jak-STAT signaling pathway	2	Stat1;Socs3;Ifnar1
mmu04630	Jak-STAT signaling pathway	2	Stat1;Socs3;Ifnar2
mmu04630	Jak-STAT signaling pathway	2	Stat1;Socs3;Ifngr1
mmu04630	Jak-STAT signaling pathway	2	Stat1;Socs3;Ifngr2
mmu04630	Jak-STAT signaling pathway	2	Stat1;Socs3;Il10rb
mmu04630	Jak-STAT signaling pathway	2	Stat1;Socs3;Il11ra1
mmu04630	Jak-STAT signaling pathway	2	Stat1;Socs3;Il12rb1
mmu04630	Jak-STAT signaling pathway	2	Stat1;Socs3;Il13ra1
mmu04630	Jak-STAT signaling pathway	2	Stat1;Socs3;Il13ra2
mmu04630	Jak-STAT signaling pathway	2	Stat1;Socs3;Il15ra
mmu04630	Jak-STAT signaling pathway	2	Stat1;Socs3;Il20ra
mmu04630	Jak-STAT signaling pathway	2	Stat1;Socs3;Il21r
mmu04630	Jak-STAT signaling pathway	2	Stat1;Socs3;Il22ra1
mmu04630	Jak-STAT signaling pathway	2	Stat1;Socs3;Il22ra2
mmu04630	Jak-STAT signaling pathway	2	Stat1;Socs3;Il28ra
mmu04630	Jak-STAT signaling pathway	2	Stat1;Socs3;Il2ra
mmu04630	Jak-STAT signaling pathway	2	Stat1;Socs3;Il2rg
mmu04630	Jak-STAT signaling pathway	2	Stat1;Socs3;Il3ra
mmu04630	Jak-STAT signaling pathway	2	Stat1;Socs3;Il4ra
mmu04630	Jak-STAT signaling pathway	2	Stat1;Socs3;Il6ra
mmu04630	Jak-STAT signaling pathway	2	Stat1;Socs3;Il7r
mmu04630	Jak-STAT signaling pathway	2	Stat1;Socs3;Il9r
mmu04630	Jak-STAT signaling pathway	2	Stat1;Socs3;Lifr
mmu04630	Jak-STAT signaling pathway	2	Il22ra1;Jak2;Pik3cd
mmu04630	Jak-STAT signaling pathway	2	Il22ra1;Jak2;Pik3cg
mmu04630	Jak-STAT signaling pathway	2	Il22ra1;Jak2;Pik3r2
mmu04630	Jak-STAT signaling pathway	2	Il22ra1;Jak2;Pik3r3
mmu04630	Jak-STAT signaling pathway	2	Il22ra1;Jak2;Pik3r5
mmu04630	Jak-STAT signaling pathway	2	Il22ra1;Jak2;Stat6
mmu04630	Jak-STAT signaling pathway	2	Pias1;Stat5a;Ccnd1
mmu04630	Jak-STAT signaling pathway	2	Pias1;Stat5a;Ccnd3
mmu04630	Jak-STAT signaling pathway	2	Pias1;Stat5a;Myc
mmu04630	Jak-STAT signaling pathway	2	Pias1;Stat5a;Pim1
mmu04630	Jak-STAT signaling pathway	2	Pias1;Stat5a;Socs1
mmu04630	Jak-STAT signaling pathway	2	Pias1;Stat5a;Socs5
mmu04630	Jak-STAT signaling pathway	2	Pias1;Stat5a;Socs7
mmu04630	Jak-STAT signaling pathway	2	Il12rb1;Jak2;Pik3cd
mmu04630	Jak-STAT signaling pathway	2	Il12rb1;Jak2;Pik3cg
mmu04630	Jak-STAT signaling pathway	2	Il12rb1;Jak2;Pik3r2
mmu04630	Jak-STAT signaling pathway	2	Il12rb1;Jak2;Pik3r3
mmu04630	Jak-STAT signaling pathway	2	Il12rb1;Jak2;Pik3r5
mmu04630	Jak-STAT signaling pathway	2	Il12rb1;Jak2;Stat6
mmu04630	Jak-STAT signaling pathway	2	Gm13305;Jak2;Pik3cd
mmu04630	Jak-STAT signaling pathway	2	Gm13305;Jak2;Pik3cg
mmu04630	Jak-STAT signaling pathway	2	Gm13305;Jak2;Pik3r2
mmu04630	Jak-STAT signaling pathway	2	Gm13305;Jak2;Pik3r3
mmu04630	Jak-STAT signaling pathway	2	Gm13305;Jak2;Pik3r5
mmu04630	Jak-STAT signaling pathway	2	Gm13305;Jak2;Stat6
mmu04630	Jak-STAT signaling pathway	2	Lifr;Jak2;Pik3cd
mmu04630	Jak-STAT signaling pathway	2	Lifr;Jak2;Pik3cg
mmu04630	Jak-STAT signaling pathway	2	Lifr;Jak2;Pik3r2
mmu04630	Jak-STAT signaling pathway	2	Lifr;Jak2;Pik3r3
mmu04630	Jak-STAT signaling pathway	2	Lifr;Jak2;Pik3r5
mmu04630	Jak-STAT signaling pathway	2	Lifr;Jak2;Stat6
mmu04630	Jak-STAT signaling pathway	2	Il7r;Jak2;Pik3cd
mmu04630	Jak-STAT signaling pathway	2	Il7r;Jak2;Pik3cg
mmu04630	Jak-STAT signaling pathway	2	Il7r;Jak2;Pik3r2
mmu04630	Jak-STAT signaling pathway	2	Il7r;Jak2;Pik3r3
mmu04630	Jak-STAT signaling pathway	2	Il7r;Jak2;Pik3r5
mmu04630	Jak-STAT signaling pathway	2	Il7r;Jak2;Stat6
mmu04630	Jak-STAT signaling pathway	2	Gm2002;Jak2;Pik3cd
mmu04630	Jak-STAT signaling pathway	2	Gm2002;Jak2;Pik3cg
mmu04630	Jak-STAT signaling pathway	2	Gm2002;Jak2;Pik3r2
mmu04630	Jak-STAT signaling pathway	2	Gm2002;Jak2;Pik3r3
mmu04630	Jak-STAT signaling pathway	2	Gm2002;Jak2;Pik3r5
mmu04630	Jak-STAT signaling pathway	2	Gm2002;Jak2;Stat6
mmu04630	Jak-STAT signaling pathway	2	Ifnar2;Jak2;Pik3cd
[truncated: 301 more rows]
