# Supplementary material for: Linking Transcriptional Changes over Time in Stimulated Dendritic Cells to Identify Gene Networks Activated during the Innate Immune Response
Source: PLoS Comput Biol. 2013 Nov 7;9(11):e1003323. doi: 10.1371/journal.pcbi.1003323 (PMC3820512; doi:10.1371/journal.pcbi.1003323)
Supplement: Table S9 — Genes and edges identified in the optimal sub-network for activated wild-type dendritic cells by a non-temporal minimum cost flow optimization method, ResponseNet. (XLSX) [file pcbi.1003323.s017.xlsx]

## Sheet: ResponseNet prediction
Supporting Table S9 A. Genes identified by ResponseNet (non-temporal minimum cost flow optimization) in the optimal network for activated wild-type dendritic cells										Supporting Table S9 B. Edges identified by ResponseNet in the optimal network for activated wild-type dendritic cells
Gene	Flow	Type		Type	Time of greatest fold change in expression:					Gene 1	Gene 2	Flow
Cxcl10	10.9074	Late		Early	0.5-1 hrs					Csnk2a1	1810035L17Rik	1
Isg15	8.14638	Late		Intermediate	2-4 hrs					Il1b	A2m	1
Il1b	7.59117	Early		Late	6-8hrs					Fcgr2b	AC160982.1	1
Cxcl2	7.58793	Early		Predicted	No detectable change in expression					H2-Aa	AC160982.1	1
Il1a	7.39629	Early								Plg	AC160982.1	1
Irf7	7.30118	Late								Tnfaip6	Acan	1
Tnf	7.09052	Early								Erbb2	Acpp	1
Ppp2ca	7	Predicted								Rxrb	Acsl1	1
AC160982.1	5.62063	Predicted								Rxrg	Acsl1	1
Egr1	5.19529	Early								Il1b	Adrb2	1
Ccl5	4.92997	Late								Dag1	Agrn	1
Mapk1	4.8857	Predicted								Nfkbid	Aicda	1
Nfkbia	4.39069	Early								Zfp36l1	Akt2	1
Nos2	4.26885	Late								Plin2	Arf1	1
Ddx58	4.17851	Late								Nos1	Arg1	1
Tnfaip3	4.02313	Early								Jund	Atf3	1
Socs1	4.01044	Late								Tiparp	Atm	1
Rela	4.00011	Intermediate								Pim3	Bad	1
Ep300	4	Predicted								Ier3	Bag6	1
Rsad2	4	Late								Jun	Batf	1
Zbp1	4	Late								Dazap2	Batf2	1
Ereg	4	Early								Tnf	Bgn	1
Nfkbiz	4	Early								Junb	Brca1	1
Cd8a	3.87124	Predicted								Btrc	Bst2	1
Areg	3.87035	Early								Enam	Bst2	1
Stat2	3.66849	Late								Atf4	Btrc	1
Egfr	3.33964	Predicted								Plg	C3	1
Cd40	3.31443	Late								Cfh	C3-Cfb	1
Crebbp	3.312	Predicted								Prtn3	Camp	1
Phlda1	3.27419	Early								Il1a	Capn1	1
Dusp1	3.24345	Early								Plk2	Cask	1
Camp	3.2387	Late								Nlrp2	Casp1	1
Zfp36	3.20387	Early								Casp1	Casp4	1
Nr4a1	3.16451	Early								Mefv	Casp4	1
Tapbp	3.09073	Late								Mki67ip	Casp7	1
Irf3	3.02387	Predicted								Mmp1a	Ccl2	1
Il7r	3	Predicted								Mmp1b	Ccl2	1
Nfkb1	3	Intermediate								Grb2	Ccl5	1
Stat1	3	Predicted								Igfbp7	Ccl5	1
Trp53	3	Predicted								Nfkb1	Ccl5	1
Lcn2	3	Late								Areg	Ccnd3	1
Oas3	2.94787	Late								Cxcl2	Ccr10	1
Ier3	2.8857	Early								Creb3	Ccr1l1	1
Ly6a	2.87656	Late								Cxcl2	Ccr3	1
Junb	2.87229	Early								Cxcl2	Ccr4	1
Slco3a1	2.86806	Late								Cxcl2	Ccr6	1
Gem	2.86756	Early								Cxcl2	Ccr7	1
H2-T22	2.86689	Late								Cxcl2	Ccr8	1
Hp	2.82991	Late								Stat2	Cd274	1
Casp4	2.82651	Late								Lck	Cd38	1
Fcgr1	2.82218	Late								Hspa4	Cd40	1
Nlrp3	2.81161	Early								Ikbkb	Cd40	1
Lgals3bp	2.79595	Late								Map2k7	Cd40	1
Il1r2	2.79335	Early								Srek1	Cd8a	1
Cebpb	2.75273	Late								Srsf1	Cd8a	1
Ccl2	2.74095	Late								Lck	Cd8b1	1
Prkca	2.69831	Predicted								Ccnd3	Cdkn1a	1
Sod2	2.68947	Late								Hmgb1	Cebpb	1
Dhx58	2.65542	Late								Rps6ka5	Cebpb	1
Gadd45a	2.65333	Early								C3	Cfb	1
Tap1	2.6312	Late								C3-Cfb	Cfb	1
Errfi1	2.61853	Early								Adm	Cfh	1
Ifi35	2.611	Late								Tnf	Chuk	1
Ube2l6	2.59719	Late								Ppp1ca	Ckb	1
Psmb8	2.58671	Late								Osm	Col4a4	1
Casp1	2.57505	Late								Nfil3	Creb3	1
Psme2	2.56341	Late								Egfr-Egfr	Crkl	1
Gbp2	2.55543	Late								Wsb1	Csf3r	1
Cd38	2.53892	Late								Rcc1	Csnk1a1	1
Ets2	2.52367	Early								Egr1	Csnk2a1	1
Il27	2.45695	Late								Gpi1	Csnk2a1	1
H2-M2	2.45464	Late								Capn1	Ctsc	1
Maff	2.41508	Early								Ccr10	Cxcl10	1
Lck	2.40473	Predicted								Ccr3	Cxcl10	1
Psmb9	2.34799	Late								Ccr4	Cxcl10	1
Fos	2.31662	Early								Ccr6	Cxcl10	1
Cited2	2.31392	Early								Ccr7	Cxcl10	1
Psmb1	2.29893	Predicted								Ccr8	Cxcl10	1
Mxd1	2.27222	Late								Stat1	Cxcl10	1
Nmi	2.27111	Late								Xcr1	Cxcl10	1
Cflar	2.24448	Early								Cxcr4	Cxcl16	1
Myc	2.22303	Predicted								Ywhag	Cxcr2	1
Ppp1r15a	2.20507	Early								Wwp1	Dag1	1
Glrx	2.17971	Late								Cflar	Daxx	1
Erbb2	2.17368	Predicted								Map3k7	Dazap2	1
Csnk2a1	2.16603	Predicted								Rxrg	Dbi	1
Hmox1	2.14764	Late								Nod2	Ddx58	1
Acsl1	2.14546	Late								Ube2d3	Ddx58	1
Psmb10	2.14188	Late								Ifih1	Dhx58	1
Trafd1	2.11466	Late								Mavs	Dhx58	1
Fpr2	2.04916	Late								Nfkbia	Dnaja3	1
Slpi	2.04277	Late								Notch1	Dtx2	1
Il15ra	2.02431	Late								Il12a	Ebi3	1
Adrb2	2.01545	Early								Ddx6	Edc4	1
Pnrc1	2.01279	Early								Ereg	Egfr	1
Rgs1	2.01257	Early								Errfi1	Egfr	1
Mavs	2	Predicted								Areg	Egfr-Egfr	1
Myd88	2	Intermediate								Ereg	Egfr-Egfr	1
Il1rap	2	Intermediate								Nfkbiz	Ehf	1
Egfr-Egfr	2	Predicted								Ifrd1	Eif2ak2	1
Grb2	2	Predicted								Serpine1	Elane	1
Hspa4	2	Predicted								Ehf	Elf3	1
Ikbkb	2	Predicted								Bgn	Enam	1
Ncald	2	Predicted								Cited2	Ep300	1
Plg	2	Predicted								Srebf2	Ep300	1
Psmb5	2	Predicted								Ereg	Erbb4	1
Ptgds	2	Predicted								Ereg	Erbb4-Erbb4	1
Rxrg	2	Predicted								Rhoa	Fas	1
Smad3	2	Predicted								Ddx5	Fbl	1
Ube2d3	2	Predicted								Plcg2	Fcer1g	1
Bst2	2	Late								Crk	Fcgr1	1
Cfb	2	Late								Crkl	Fcgr1	1
H2-K1	2	Late								Mapk1	Fcgr3	1
Ifi202b	2	Late								Flrt3	Fgfr1	1
Oasl1	2	Late								Camp	Fpr2	1
Psmb6	2	Late								Fpr3	Fpr2	1
Ptges	2	Late								Camp	Fpr3	1
Slc3a2	2	Late								Daxx	Fth1	1
Usp18	2	Late								Gsk3b	Gbp2	1
Xaf1	2	Late								Mapk12	Gch1	1
Tnfsf9	2	Early								Rgs1	Gde1	1
Psma7	2	Predicted								Map3k5	Glrx	1
Mapk12	2	Predicted								Nfic	Glrx	1
Cd274	1.98554	Late								Eif2ak2	Gnl3	1
H2-T23	1.98501	Late								Erbb4-Erbb4	Grb2	1
Mdm2	1.97467	Early								Pnrc1	Grb2	1
Cd14	1.96936	Early								Irf8	H2-K1	1
Hck	1.96645	Late								Rela	H2-K1	1
Acpp	1.95238	Late								AC160982.1	H2-M2	1
Eif2ak2	1.94787	Intermediate								Cd8a	H2-M2	1
Ptpn6	1.94251	Intermediate								AC160982.1	H2-T22	1
Tnfrsf1b	1.93299	Late								Cd8a	H2-T22	1
Btg2	1.9321	Early								Cd8a	H2-T23	1
Traf6	1.92763	Early								AC160982.1	H2-T24	1
Cdkn1a	1.90961	Late								AC160982.1	H2-T3	1
Gpi1	1.90202	Early								Nfe2	H3f3b	1
Dusp5	1.87784	Early								Il1a	Hax1	1
Irf1	1.84368	Intermediate								Hax1	Hcls1	1
Irf8	1.8179	Predicted								Il1b	Hmgb1	1
Ywhab	1.81656	Early								Ppara	Hmox1	1
H2-T24	1.80068	Late								Itgb2	Hp	1
Lgals3	1.79595	Predicted								Itgb2l	Hp	1
C3	1.77759	Late								Dusp1	Hspa4	1
Ccr10	1.77401	Predicted								Phlda1	Hspa4	1
Ero1l	1.77294	Early								Bag6	Hspa8	1
Parp10	1.74675	Late								Tnf	Icam1	1
Osm	1.74548	Early								E2f1	Ifi202b	1
Fth1	1.74479	Late								Trp53	Ifi202b	1
Tgif1	1.73701	Early								Batf	Ifi35	1
Ripk1	1.73488	Predicted								Plekho1	Ifi35	1
B2m	1.72002	Late								Pcbp2	Ifih1	1
H3f3b	1.71695	Late								Eif3c	Ifit1	1
Lmo4	1.70531	Late								Ep300	Ifnar2	1
Ifrd1	1.70424	Early								Myd88	Ifnb1	1
Jun	1.68338	Early								Mapk1	Ifng	1
Pttg1	1.6814	Late								Gsk3a	Ifngr1	1
Plk2	1.68003	Early								Vegfa	Igfbp7	1
Dusp6	1.6798	Early								Tgtp1	Igtp	1
Psme1	1.67864	Late								Ppp1r15a	Ikbkb	1
Ly6e	1.67184	Late								Tnfaip3	Ikbke	1
Atf4	1.64368	Early								Tnip3	Ikbkg	1
Prkaca	1.64036	Predicted								Il2rb	Il15	1
Fabp3	1.63556	Late								Cbl	Il15ra	1
Vegfa	1.62966	Early								Il1rap-Il1r1	Il1r1	1
Malt1	1.6231	Early								Il1a	Il1r2	1
Map3k7	1.62309	Predicted								Il1a	Il1rap	1
Rgs2	1.6195	Late								Il1rap-Il1r2	Il1rap	1
Cd8b1	1.61533	Predicted								Il1a	Il1rap-Il1r1	1
Gch1	1.61372	Late								Il1a	Il1rap-Il1r2	1
Ripk3	1.61283	Predicted								Il1r1	Il1rn	1
Mlkl	1.61283	Late								Jak1	Il21r	1
Cish	1.6059	Early								Il27ra	Il27	1
Mlh1	1.60465	Predicted								Mapk8	Il27ra	1
Nfil3	1.58773	Early								Pfn1	Il7r	1
Psmb7	1.58671	Late								Ywhab	Il7r	1
Serpine1	1.55745	Early								Arf1	Insr	1
Ikbke	1.54663	Intermediate								Ncoa2	Irf3	1
Plin2	1.53234	Early								Chuk	Irf7	1
Mmp14	1.52777	Late								Ep300	Irf7	1
Hist1h1c	1.52768	Early								Ikbkb	Irf7	1
Cxcl16	1.52494	Late								Myd88	Irf7	1
Trem1	1.52477	Early								Smad3	Irf7	1
Capn1	1.50862	Predicted								Ddx58	Isg15	1
Ccnl1	1.50859	Early								Elf3	Isg15	1
Igfbp7	1.50714	Predicted								Hspa4	Isg15	1
F3	1.50377	Early								Nedd4	Isg15	1
Hmgb1	1.49806	Predicted								Rgs3	Isg15	1
Cdk1	1.48591	Predicted								Uba7	Isg15	1
Chmp4b	1.47816	Late								Ube2d3	Isg15	1
Sgk1	1.47566	Early								Cd14	Itgb2l	1
Cav1	1.47442	Late								Syncrip	Ivns1abp	1
Ccl6	1.46333	Late								Fosl2	Jund	1
Cxcr4	1.4609	Intermediate								Rbm7	Khdrbs3	1
Sdc3	1.46076	Late								Nfkbia	Lck	1
Rbm7	1.45815	Early								Cebpa	Lcn2	1
Rel	1.45101	Early								Cebpb	Lcn2	1
Psma6	1.4495	Late								Rela	Lcn2	1
Irf4	1.42792	Early								Fn1	Lgals3bp	1
Tnfaip6	1.41803	Early								Itgb1	Lgals3bp	1
Skil	1.39863	Early								Brca1	Lmo4	1
Ndrg1	1.38414	Early								Pou2f2	Ly6a	1
Tgfbi	1.36583	Late								Stat1	Ly6a	1
Id2	1.36483	Early								Fcgr3	Ly6e	1
Actb	1.36151	Early								Trib1	Map2k7	1
Fcer1g	1.35684	Late								Tnf	Map3k7	1
Arg1	1.35425	Late								Dusp1	Mapk1	1
Wsb1	1.35159	Early								Dusp2	Mapk1	1
Lmnb1	1.35152	Early								Dusp5	Mapk1	1
Tpst1	1.33688	Late								Zfp36	Mapk1	1
Sap30	1.33374	Late								Dusp6	Mapk8	1
Pgf	1.32955	Early								Malt1	Mapk9	1
Hspa8	1.32102	Late								Scgb3a1	Marco	1
Ube2i	1.31392	Predicted								Erbb2	Matk	1
Btg1	1.30529	Early								Traf6	Mavs	1
Tle3	1.30181	Late								Suv39h1	Mbd1	1
Prdm1	1.29924	Early								Phlda1	Mdfi	1
Klf6	1.28472	Early								Nlrp3	Mefv	1
Stat3	1.26301	Late								Mki67	Mki67ip	1
Cbl	1.25784	Predicted								Ndrg1	Mlh1	1
Il21r	1.25784	Late								Cdk1	Mlkl	1
Pml	1.25046	Late								Ppp1r15a	Mll1	1
Eif3c	1.24996	Predicted								Mmp2	Mmp14	1
Dtx2	1.24711	Late								Acan	Mmp19	1
Abl1	1.23207	Predicted								Fos	Mmp1a	1
S100a9	1.23089	Late								Fos	Mmp1b	1
Ikbkg	1.22841	Predicted								Il1b	Mmp2	1
Il15	1.22067	Late								Umod	Mmp8	1
Pik3r1	1.22067	Early								Areg	Mmp9	1
Cd47	1.21942	Late								Trim71	Mov10	1
Nfkbie	1.20629	Late								Hdac2	Mxd1	1
Psma5	1.2052	Late								Sin3a	Mxd1	1
Moap1	1.19939	Early								Tfap2b	Myc	1
Bhlhe40	1.19266	Early								Il1rap	Myd88	1
Pfn1	1.19257	Early								Irf4	Myd88	1
Blnk	1.18837	Late								Actb	Ncald	1
Fosl2	1.18203	Early								Tubb5	Ncald	1
Maf	1.1797	Late								Nr4a1	Ncoa2	1
Pilrb1	1.1739	Late								Nr1d1	Ncor2	1
Rxrb	1.17026	Predicted								Il1a	Ndn	1
Atf3	1.168	Late								Maff	Nfe2	1
Usp25	1.16432	Late								Crebbp	Nfic	1
Mki67	1.16374	Early								Cflar	Nfkb1	1
Pcbp2	1.15663	Predicted								Il1r2	Nfkb1	1
Ifnar2	1.15276	Late								Nfkbiz	Nfkb1	1
Casp7	1.14584	Late								Nfkbiz	Nfkb2	1
Ppara	1.14545	Predicted								Il1b	Nlrp2	1
Psma2	1.14189	Late								Stat5b	Nmi	1
Ccng2	1.13735	Early								Nlrp3	Nod2	1
Ptpn1	1.13477	Late								Mapk9	Nos2	1
Matk	1.13311	Late								Gnl3	Oas3	1
Rnd3	1.13042	Early								Mavs	Oas3	1
Ckb	1.11327	Late								Mbd1	Oasl1	1
Insig1	1.11186	Early								Thra	Oasl1	1
Rhoc	1.1079	Late								Phlda1	Pabpc4	1
Brca1	1.10169	Predicted								Myc	Parp10	1
Hdac2	1.0979	Predicted								Mlh1	Parp12	1
Sh2b2	1.09757	Early								Id2	Pax8	1
Stxbp3a	1.09621	Late								Errfi1	Pdgfrb	1
Gpx1	1.09403	Late								Ptpn11	Pilrb1	1
Cybb	1.09373	Late								Erbb4	Plcg2	1
Irs2	1.0897	Early								Akt2	Plekho1	1
Gsk3b	1.08911	Predicted								F3	Plg	1
Ifngr1	1.08911	Late								Ncald	Pnp	1
Cd300ld	1.08744	Late								Ncald	Pnp2	1
Itga5	1.0869	Late								Gadd45a	Ppara	1
Map2k1	1.08175	Late								Csrnp1	Ppp1ca	1
Trib1	1.07274	Early								Ccng2	Ppp2ca	1
Txn1	1.07036	Late								Dusp1	Ppp2ca	1
Rassf3	1.06743	Late								Mapk1	Ppp2ca	1
Mmp8	1.06342	Late								Mapk11	Ppp2ca	1
H2-Aa	1.06139	Early								Sufu	Prdx5	1
Ddx5	1.06065	Early								Btg2	Prkca	1
Sat1	1.04868	Early								Hist1h1c	Prkca	1
Mapk8	1.03967	Predicted								Lmnb1	Prkcd	1
Nanog	1.03853	Early								Ier3	Prnp	1
Fcgr2b	1.03109	Early								Il1b	Prtn3	1
Adm	1.02338	Early								Psma7	Psma2	1
Tubb5	1.01732	Early								Ppp2ca	Psma5	1
Hcls1	1.01654	Late								Ppp2ca	Psma6	1
Dusp2	1.01034	Early								Egfr	Psma7	1
Zfp36l1	1.00612	Early								Mdm2	Psma7	1
Anxa6	1.00269	Late								Ppp2ca	Psmb1	1
Il2rb	1	Predicted								Ppp2ca	Psmb10	1
Sh2d1a	1	Predicted								Psmb1	Psmb10	1
Smad1	1	Predicted								Smad1	Psmb4	1
H2-Bl	1	Predicted								Ikbkap	Psmb5	1
E2f1	1	Predicted								Pik3r1	Psmb5	1
Ptpn11	1	Predicted								Fbl	Psmb6	1
Sfpi1	1	Early								Ppp2ca	Psmb6	1
Ifih1	1	Intermediate								Ppp2ca	Psmb7	1
Il12a	1	Intermediate								Ppp2ca	Psmb8	1
Icam1	1	Intermediate								Psmb1	Psmb8	1
Traf1	1	Intermediate								Psma2	Psmb9	1
Batf	1	Intermediate								Psmb7	Psmb9	1
Mefv	1	Intermediate								Il7r	Psme1	1
Ccr7	1	Intermediate								Ifng	Psme2	1
Prkcd	1	Intermediate								Il7r	Psme2	1
Pabpc4	1	Intermediate								Tnf	Psme2b-ps	1
Plekho1	1	Intermediate								Egfr	Ptgds	1
Birc3	1	Intermediate								Ptgds	Ptger1	1
Gde1	1	Intermediate								Ptgds	Ptger2	1
Cebpa	1	Intermediate								Ptger1	Ptges	1
Nod2	1	Intermediate								Ptger2	Ptges	1
Ptger2	1	Intermediate								Irs2	Ptpn6	1
Map3k5	1	Intermediate								Trp53	Pttg1	1
Notch1	1	Intermediate								Chka	Rcc1	1
Ncor2	1	Intermediate								Il1r2	Rela	1
Dag1	1	Intermediate								Nfkbia	Rela	1
A2m	1	Predicted								Nfkbiz	Rela	1
Acan	1	Predicted								Gde1	Rgs2	1
Aicda	1	Predicted								Mapk12	Rgs3	1
Akt2	1	Predicted								Tnfaip3	Ripk1	1
Arf1	1	Predicted								Dnaja3	Rnf34	1
Atm	1	Predicted								Nr4a1	Rps6ka5	1
Bad	1	Predicted								Ifnb1	Rsad2	1
Bag6	1	Predicted								Irak1	Rsad2	1
Bgn	1	Predicted								Irf1	Rsad2	1
Birc7	1	Predicted								Irf7	Rsad2	1
Btrc	1	Predicted								Pax8	Rxrb	1
C3-Cfb	1	Predicted								Nr4a1	Rxrg	1
Cask	1	Predicted								Egfr	S100a9	1
Ccnd3	1	Predicted								Tfcp2	Saa3	1
Ccr1l1	1	Predicted								Sfpi1	Scgb3a1	1
Ccr3	1	Predicted								Tnf	Sele	1
Ccr6	1	Predicted								Sele	Selplg	1
Ccr8	1	Predicted								Aicda	Serpinb1a	1
Cfh	1	Predicted								Mll1	Set	1
Chuk	1	Predicted								Trp53	Shisa5	1
Creb3	1	Predicted								Khdrbs3	Siah1b	1
Crkl	1	Predicted								Tgif1	Sin3a	1
Csf3r	1	Predicted								Ep300	Sirt2	1
Csnk1a1	1	Predicted								Sh2d1a	Slamf7	1
Dazap2	1	Predicted								Icam1	Slc3a2	1
Dbi	1	Predicted								Lgals3	Slc3a2	1
Ddx6	1	Predicted								Siah1b	Slc9a3r2	1
Dnaja3	1	Predicted								Slc9a3r1	Slco3a1	1
Edc4	1	Predicted								Slc9a3r2	Slco3a1	1
Ehf	1	Predicted								Egr1	Smad3	1
Elane	1	Predicted								Junb	Smad3	1
Elf3	1	Predicted								Crebbp	Socs1	1
Enam	1	Predicted								Insr	Socs1	1
Erbb4	1	Predicted								Pdgfrb	Socs1	1
Erbb4-Erbb4	1	Predicted								Il7r	Sod2	1
Fbl	1	Predicted								Sp1	Sod2	1
Fcgr3	1	Predicted								Egr1	Sp1	1
Fgfr1	1	Predicted								Sirt2	Sp140	1
Fn1	1	Predicted								Insig1	Srebf2	1
Foxg1	1	Predicted								Pabpc4	Srek1	1
Fpr3	1	Predicted								Atm	Stat1	1
Gsk3a	1	Predicted								Mapk1	Stat1	1
H2-T3	1	Predicted								Crebbp	Stat2	1
Hax1	1	Predicted								Ep300	Stat2	1
Ifnb1	1	Predicted								Ets2	Stat5b	1
Ifng	1	Predicted								Prkca	Stxbp3a	1
Ikbkap	1	Predicted								Prdm1	Suv39h1	1
Il1rap-Il1r1	1	Predicted								Sh2b2	Syk	1
Il1rap-Il1r2	1	Predicted								Prmt1	Syncrip	1
Insr	1	Predicted								Psmb5	Tap1	1
Irak1	1	Predicted								Tapbp	Tap1	1
Itgb1	1	Predicted								Psmb5	Tap2	1
Itgb2	1	Predicted								H2-Bl	Tapbp	1
Itgb2l	1	Predicted								H2-K1	Tapbp	1
Jund	1	Predicted								H2-T3	Tapbp	1
Khdrbs3	1	Predicted								Cited2	Tfap2b	1
Map2k7	1	Predicted								Mapk14	Tfcp2	1
Mapk11	1	Predicted								Col4a4	Tgfbi	1
Mapk9	1	Predicted								Stat1	Tgtp1	1
Mbd1	1	Predicted								Btg1	Thra	1
Mdfi	1	Predicted								Tnfaip3	Ticam1	1
Megf10	1	Predicted								Foxg1	Tle3	1
Mmp2	1	Predicted								Trem1	Tlr4	1
Mmp9	1	Predicted								Moap1	Tnfrsf1a	1
Ndn	1	Predicted								Csnk1a1	Tnfrsf1b	1
Nedd4	1	Predicted								Tnfsf9	Tnfrsf9	1
Nfe2	1	Predicted								Selplg	Tpst1	1
Nfkb2	1	Predicted								Tnfsf9	Traf1	1
Nlrp2	1	Predicted								Ticam1	Trafd1	1
Nos1	1	Predicted								Traf1	Trafd1	1
Pax8	1	Predicted								Set	Trex1	1
Pdgfrb	1	Predicted								Gem	Trim23	1
Plcg2	1	Predicted								Trim23	Trim27	1
Pou2f2	1	Predicted								Edc4	Trim71	1
Ppp1ca	1	Predicted								Egr1	Trp53	1
Prnp	1	Predicted								Klf6	Trp53	1
Prtn3	1	Predicted								Dbi	Tspo	1
Psme2b-ps	1	Predicted								Fas	Uba7	1
Ptger1	1	Predicted								Sat1	Ube2d3	1
Rcc1	1	Predicted								Tnfaip3	Ube2d3	1
Rhoa	1	Predicted								Bhlhe40	Ube2i	1
Scgb3a1	1	Predicted								Trim27	Ube2l6	1
Set	1	Predicted								Il1b	Umod	1
Sin3a	1	Predicted								Vim	Upp1	1
Sirt2	1	Predicted								Irf2	Usp18	1
Slc9a3r2	1	Predicted								Irf3	Usp18	1
Sp1	1	Predicted								Birc3	Xaf1	1
Srebf2	1	Predicted								Birc7	Xaf1	1
Srek1	1	Predicted								Cxcl2	Xcr1	1
Stat5b	1	Predicted								Gem	Ywhab	1
Sufu	1	Predicted								Zfp36	Ywhag	1
Syk	1	Predicted								Irf3	Zbp1	1
Syncrip	1	Predicted								Irf7	Zbp1	1
Tfap2b	1	Predicted								Ripk1	Zbp1	1
Tfcp2	1	Predicted								Ripk3	Zbp1	1
Tgtp1	1	Predicted								Megf10	Znfx1	1
Thra	1	Predicted								Ikbke	Irf7	0.998705
Ticam1	1	Predicted								Gtf2b	Irf1	0.997408
Tlr4	1	Predicted								Tnfrsf9	Traf2	0.992616
Tnfrsf1a	1	Predicted								Ddx39	Hipk2	0.99178
Tnfrsf9	1	Predicted								Cd9	Cd38	0.987501
Trim23	1	Predicted								Ikbkg	Rnf31	0.986713
Trim27	1	Predicted								AC160982.1	H2-T23	0.985009
Trim71	1	Predicted								Cdk11b	Casp1	0.983877
Uba7	1	Predicted								Ccnl1	Cdk11b	0.983877
Umod	1	Predicted								Ndn	Hif1a	0.983172
Vim	1	Predicted								Ero1l	Erp29	0.982677
Wwp1	1	Predicted								Erp29	Il7r	0.982677
Ywhag	1	Predicted								Snx18	Sos1	0.980288
1810035L17Rik	1	Late								Rgs1	Gnao1	0.979781
Batf2	1	Late								Gnao1	Gpsm2	0.979781
Ctsc	1	Late								Eif4a2	Eif3c	0.975775
Ebi3	1	Late								Prkaca	Pde3b	0.975098
Fas	1	Late								Mdm2	Irf2	0.974672
Gnl3	1	Late								H2-Eb1	AC160982.1	0.967201
Ifit1	1	Late								Tnfrsf1a	Nos2	0.962907
Igtp	1	Late								Sox9	Maf	0.962025
Il1r1	1	Late								Nanog	Med12	0.962025
Il1rn	1	Late								Med12	Sox9	0.962025
Ivns1abp	1	Late								Shbg	Acpp	0.952381
Marco	1	Late								Myc	Nmi	0.950807
Mmp19	1	Late								Brd2	E2f1	0.950748
Mov10	1	Late								Map3k4	Map2k1	0.94802
Parp12	1	Late								Gadd45a	Map3k4	0.94802
Pnp	1	Late								Eif2ak2	Lyar	0.947867
Pnp2	1	Late								Lyar	Oas3	0.947867
Prdx5	1	Late								Vdac1	Mavs	0.947328
Psmb4	1	Late								Lilrb4	Ptpn6	0.942509
Rnf34	1	Late								Dedd2	E030030I06Rik	0.940858
Saa3	1	Late								Ube3a	Ube2l6	0.940241
Serpinb1a	1	Late								Pgf	Erbb2	0.939305
Shisa5	1	Late								Kdr	Anxa5	0.937879
Slamf7	1	Late								Lepr	Ptpn11	0.935779
Sp140	1	Late								Ets2	Tdp2	0.932986
Tap2	1	Late								Tdp2	Tnfrsf1b	0.932986
Trex1	1	Late								Skil	Smad1	0.932866
Tspo	1	Late								Adrb2	Slc9a3r1	0.927841
Upp1	1	Late								Zap70	Cd8a	0.92195
Znfx1	1	Late								Cish	Il2rb	0.917265
Chka	1	Early								Ranbp1	Hnf1a	0.916069
Csrnp1	1	Early								Rnd3	Arhgap5	0.913216
Flrt3	1	Early								Arhgap5	Itga5	0.913216
Nfkbid	1	Early								Elane	Slpi	0.909451
Nr1d1	1	Early								Por	Hmox1	0.90945
Pim3	1	Early								Cyb5	Por	0.90945
Tiparp	1	Early								Trim7	Des	0.905794
Tnip3	1	Early								Des	Shbg	0.905794
Ccr4	1	Predicted								Gyg	Trim7	0.905794
Col4a4	1	Predicted								Calr	B2m	0.902121
Crk	1	Predicted								Gpi1	Igfbp3	0.902022
Daxx	1	Predicted								Dnajb1	Brms1	0.898227
Il27ra	1	Predicted								Prnp	Cav1	0.891312
Jak1	1	Predicted								Rel	Notch1	0.891312
Mki67ip	1	Predicted								Rras2	Ptpn1	0.888041
Mll1	1	Predicted								Rapgef2	Rras2	0.888041
Mmp1a	1	Predicted								Apbb3	App	0.885811
Mmp1b	1	Predicted								Ier3	Mapk1	0.885701
Ncoa2	1	Predicted								Tlr4	Nos2	0.884048
Nfic	1	Predicted								Traf2	Ripk3	0.877953
Prmt1	1	Predicted								Areg	Wt1	0.870346
Rgs3	1	Predicted								Prkca	Ddx58	0.868399
Rps6ka5	1	Predicted								Cftr	Pdzd3	0.868062
Sele	1	Predicted								Pdzd3	Slco3a1	0.868062
Selplg	1	Predicted								Gem	Gmip	0.867564
Siah1b	1	Predicted								Gmip	Rhoa	0.867564
Srsf1	1	Predicted								Cd8b1	H2-T22	0.866887
Suv39h1	1	Predicted								Btg2	Prmt1	0.864967
Xcr1	1	Predicted								Smad3	Foxg1	0.86236
Agrn	1	Late								Junb	Mapk14	0.848512
Cxcr2	1	Late								Polr2f	Irf1	0.846274
Mapk14	1	Predicted								Cenpa	Diap1	0.844256
Irf2	1	Intermediate								Diap1	Rhoc	0.844256
Slc9a3r1	1	Intermediate								Irf1	Il27	0.843682
Gtf2b	0.997408	Early								Egr1	Ada	0.842996
Traf2	0.992616	Late								Dpp4	Cxcl10	0.842996
Ddx39	0.99178	Early								Ada	Dpp4	0.842996
Hipk2	0.99178	Early								Ell	Trp53	0.842746
Cd9	0.987501	Predicted								Cask	Sdc3	0.833838
Rnf31	0.986713	Late								Gna13	Cxcr4	0.832352
Hmox2	0.984355	Late								Fgfr1	Crk	0.83193
Cdk11b	0.983877	Predicted								Litaf	Nedd4	0.83193
Hif1a	0.983172	Late								Rnf19a	Sufu	0.830377
Erp29	0.982677	Predicted								Ramp3	Calcr	0.830266
Sos1	0.980288	Predicted								Calcr	Flnc	0.830266
Snx18	0.980288	Early								Flnc	Usp25	0.830266
Gnao1	0.979781	Predicted								Prkca	Cd163	0.82991
Gpsm2	0.979781	Late								Cd163	Hp	0.82991
Eif4a2	0.975775	Early								Pphln1	Casp4	0.826508
Pde3b	0.975098	Late								E030030I06Rik	Pphln1	0.826508
Anxa5	0.967597	Late								Syk	Fcgr1	0.822178
H2-Eb1	0.967201	Early								Irf8	B2m	0.817904
Med12	0.962025	Predicted								Dusp4	Mapk12	0.817548
Sox9	0.962025	Predicted								Ywhab	Cbl	0.816563
Shbg	0.952381	Predicted								Txnip	Txn1	0.811614
Brd2	0.950748	Early								Nlrp3	Txnip	0.811614
Map3k4	0.94802	Predicted								Clcf1	Cntfr	0.804258
Lyar	0.947867	Predicted								Oprm1	Gnai1	0.802691
Tgfbr1	0.947564	Late								Dnajb4	Oprm1	0.802691
Vdac1	0.947328	Early								Cd8a	H2-T24	0.800677
Lilrb4	0.942509	Early								Lgals3	Lgals3bp	0.795954
E030030I06Rik	0.940858	Predicted								Msr1	Traf6	0.79579
Dedd2	0.940858	Early								Pdia3	Calr	0.790261
Ube3a	0.940241	Predicted								Ero1l	Pdia3	0.790261
Il10ra	0.939362	Early								Rbm39	Ncoa6	0.788892
Kdr	0.937879	Predicted								Ncoa6	Rxrg	0.788892
Lepr	0.935779	Early								Itga1	Fabp3	0.786992
Tdp2	0.932986	Predicted								Irf3	Cxcl10	0.78568
Fyb	0.925695	Late								Psma7	Psmb1	0.774216
Zap70	0.92195	Predicted								Ccr10	Ccl6	0.774008
Hmga1	0.919733	Late								Prrc2a	Ccr10	0.774008
Cenpa	0.916942	Early								Hnrnpm	Prrc2a	0.774008
Hnf1a	0.916069	Predicted								Tpd52l1	Map3k5	0.773086
Ranbp1	0.916069	Early								Tpd52	Tpd52l1	0.773086
Arhgap5	0.913216	Predicted								Fabp4	Vim	0.772062
Por	0.90945	Predicted								Klf4	Crebbp	0.76814
Cyb5	0.90945	Early								Prrx1	Gtf2i	0.767136
Des	0.905794	Predicted								Maff	Prrx1	0.767136
Trim7	0.905794	Predicted								Got1	Egfr	0.7597
Gyg	0.905794	Early								Sgk1	Fanca	0.758893
Calr	0.902121	Predicted								Fanca	Gm5506	0.758893
Igfbp3	0.902022	Predicted								Gm5506	Isg15	0.758893
Brms1	0.898227	Predicted								Abl1	C3	0.754214
Dnajb1	0.898227	Early								A2m	Anxa6	0.752729
Rras2	0.888041	Intermediate								Rac1	Cybb	0.752586
Rapgef2	0.888041	Early								Mapk1	Lck	0.751968
App	0.885811	Predicted								H3f3a	Parp10	0.746749
Apbb3	0.885811	Early								Csf3r	Fth1	0.744794
Wt1	0.870346	Predicted								Smad2	Irf7	0.741778
Cftr	0.868063	Predicted								Tob1	Smad2	0.741778
Pdzd3	0.868062	Predicted								Traf6	Irf8	0.73796
Gmip	0.867564	Predicted								Tgif1	Wwp1	0.737009
Arhgef3	0.859123	Early								Lsm2	Gbp2	0.736729
Polr2f	0.846274	Early								Lsm7	Lsm2	0.736729
Diap1	0.844256	Predicted								Zfand5	Ripk1	0.734878
Ada	0.842996	Predicted								Ripk1	Ripk3	0.734878
Dpp4	0.842996	Predicted								Akt1	Irf3	0.733814
Ell	0.842746	Early								Ptpn6	Clec4a1	0.730568
Dusp4	0.836057	Early								Rhob	Ppp2ca	0.726687
Gna13	0.832352	Early								Arhgef3	Rhob	0.726687
Litaf	0.83193	Early								Gusb	Prkaca	0.723885
Rnf19a	0.830377	Early								Adrb2	Cftr	0.722058
Calcr	0.830266	Predicted								Crem	Gsk3b	0.721533
Flnc	0.830266	Predicted								Sertad1	Crebbp	0.718935
Ramp3	0.830266	Early								Cxcr2	Ccl5	0.717988
Cd163	0.82991	Predicted								Ppp1r3b	Calm1	0.712674
Pphln1	0.826508	Predicted								Calm1	Nos2	0.712674
Map3k8	0.824333	Early								Ndel1	Cdk1	0.711334
Gadd45g	0.823763	Early								Nfkb1	Nos2	0.709219
Gabpb1	0.814875	Early								Mknk2	Eif4e	0.707183
Txnip	0.811614	Intermediate								Eif4e	Pml	0.707183
Cntfr	0.804258	Predicted								Rbbp8	Lmo4	0.705313
Clcf1	0.804258	Early								Gadd45a	Pcna-ps2	0.705313
Gnai1	0.802691	Predicted								Pcna-ps2	Rbbp8	0.705313
Oprm1	0.802691	Predicted								Ifrd1	Hdac2	0.704242
Dnajb4	0.802691	Early								Rab7	Atp6v0d2	0.703477
Msr1	0.79579	Early								Fxr1	Fxr2	0.703477
Pdia3	0.790261	Predicted								Rabac1	Rab7	0.703477
Rbm39	0.788892	Early								Fxr2	Rabac1	0.703477
Ncoa6	0.788892	Predicted								Ap4b1	Bub1	0.70229
Itga1	0.786992	Predicted								Svil	Camp	0.70229
Hnrnpm	0.774008	Early								Bub1	Svil	0.70229
Prrc2a	0.774008	Predicted								Tbk1	Irf3	0.701108
Tpd52l1	0.773086	Predicted								Gltscr2	Eif2ak2	0.699672
Tpd52	0.773086	Early								Csda	Pcbp2	0.698474
Fabp4	0.772062	Early								Ptgir	Prkca	0.698309
Klf4	0.76814	Early								Cdc42ep4	Rhoq	0.698274
Prrx1	0.767136	Predicted								Rela	Ccl5	0.69737
Gtf2i	0.767136	Late								Hmgb2	Pou2f2	0.69543
Got1	0.7597	Early								Hexim1	Ccnt1	0.693599
Fanca	0.758893	Predicted								Ccnt1	Grn	0.693599
Gm5506	0.758893	Predicted								Grn	Slpi	0.693599
Rac1	0.752586	Predicted								Xpo1	Nfkbie	0.692377
H3f3a	0.74675	Predicted								Ran	Xpo1	0.692377
Smad2	0.741778	Intermediate								Gal	Galr2	0.691656
Tob1	0.741778	Early								Galr2	Gnaq	0.691656
Ptpn2	0.736848	Early								Rela	Sod2	0.689475
Lsm2	0.736729	Predicted								Ccr1l1	Ccl6	0.689326
Lsm7	0.736729	Early								Cish	Stat1	0.688638
Zfand5	0.734878	Early								Sirpa	Fyb	0.684415
Akt1	0.733814	Early								Il1rap	Sirpa	0.684415
Clec4a1	0.730568	Late								Jun	Il12a	0.683385
Rhob	0.726687	Predicted								Plk2	Ikbkap	0.680027
Gusb	0.723885	Early								Dusp6	Mapk12	0.679802
Crem	0.721533	Early								Brms1	Sap30	0.679613
Sertad1	0.718935	Early								Ppard-Rxra	Fabp3	0.678308
Ppp1r3b	0.712674	Early								Gadd45g	Ppard	0.678308
Calm1	0.712674	Predicted								Ppard	Ppard-Rxra	0.678308
Ndel1	0.711334	Early								Cdkn1b	Abl1	0.676669
Eif4e	0.707183	Intermediate								Hbp1	Myc	0.674997
Mknk2	0.707183	Early								Chd1	H3f3a	0.674063
Rbbp8	0.705313	Predicted								Btk	Blnk	0.673672
Pcna-ps2	0.705313	Predicted								Cmtm3	Btk	0.673672
Rab7	0.703477	Predicted								Gzmb	Cd247	0.671843
Atp6v0d2	0.703477	Late								Hopx	Gzmb	0.671843
Fxr1	0.703477	Early								Cd247	Ly6e	0.671843
Fxr2	0.703477	Predicted								Ube2i	Birc7	0.663087
Rabac1	0.703477	Predicted								Nfkb2	Stat3	0.663087
Svil	0.70229	Intermediate								Ubtf	Crebbp	0.659295
Bub1	0.70229	Predicted								Bad	Pim1	0.658851
Ap4b1	0.70229	Early								Pim1	Socs1	0.658851
Tbk1	0.701108	Early								Spen	Ube2l6	0.656952
Gltscr2	0.699672	Early								Egfr-Egfr	Cblc	0.656295
Csda	0.698474	Early								Cblc	Il15ra	0.656295
Ptgir	0.698309	Early								Ddx58	Dhx58	0.655419
Rhoq	0.698274	Intermediate								Sh3glb1	Htt	0.654132
Cdc42ep4	0.698274	Early								Htt	Sap30	0.654132
Erh	0.69794	Early								Sh3bp2	Lck	0.652764
Hmgb2	0.69543	Early								Creb5	Ep300	0.652693
Grn	0.693599	Predicted								Upf1	Ddx6	0.651604
Hexim1	0.693599	Early								Pnrc1	Upf1	0.651604
Ccnt1	0.693599	Predicted								Pias2	Chmp4b	0.650832
Xpo1	0.692377	Predicted								Ube2i	Pias2	0.650832
Ran	0.692377	Early								Prkd3	Gsk3a	0.65081
Galr2	0.691656	Predicted								Csrp2	Pias1	0.64484
Gnaq	0.691656	Predicted								Pias1	Stat2	0.64484
Gal	0.691656	Early								Fes	Dok1	0.644344
Hopx	0.691455	Early								Dok1	Sh2d1a	0.644344
Psmc5	0.690865	Early								Atf4	Crebbp	0.643682
Sirpa	0.684415	Predicted								Gnai1	Hck	0.643527
Hist1h2bg	0.684036	Early								Epb4.2	Cd47	0.642234
Ppard	0.678308	Predicted								Slc4a2	Epb4.2	0.642234
Ppard-Rxra	0.678308	Predicted								Wdr12	Ppp2ca	0.638564
Cdkn1b	0.676669	Early								Bop1	Wdr12	0.638564
Hbp1	0.674997	Early								Pold2	Cdkn1a	0.637256
Chd1	0.674063	Early								Pold4	Pold2	0.637256
Btk	0.673672	Intermediate								AC160982.1	H2-Bl	0.635624
Cmtm3	0.673672	Early								Rasd1	Nos1	0.634447
Cd247	0.671843	Predicted								Cenpb	Rasd1	0.634447
Gzmb	0.671843	Predicted								Hbegf	Cd9	0.631633
Klf2	0.667327	Early								Ptpn6	Cd300ld	0.631316
Ubtf	0.659295	Early								Psmb8	Tap1	0.631199
Pim1	0.658851	Predicted								Plec	Cxcr4	0.62855
Spen	0.656952	Predicted								Osm	Col4a6	0.626917
Cblc	0.656295	Predicted								Col4a6	Sdc3	0.626917
Htt	0.654132	Predicted								Slc3a2	Slc7a8	0.623372
Sh3glb1	0.654132	Early								Malt1	Map3k7	0.623095
Sh3bp2	0.652764	Early								Gnaq	Rgs2	0.619498
Creb5	0.652693	Early								Bid	Csnk2b	0.619308
Upf1	0.651604	Predicted								Csnk2b	Gbp2	0.619308
Pias2	0.650832	Predicted								Map3k8	Ikbkb	0.619052
Prkd3	0.65081	Early								Errfi1	Erbb2	0.618532
Pias1	0.64484	Predicted								Siva1	Abl2	0.616173
Csrp2	0.64484	Early								Abl2	Gpx1	0.616173
Dok1	0.644344	Predicted								Nrg1	Erbb2	0.615845
Fes	0.644344	Early								Herpud1	Cd3d	0.615334
Epb4.2	0.642234	Predicted								Cd3d	Cd8b1	0.615334
Slc4a2	0.642234	Early								Cyth1	Itgb2	0.615331
Bop1	0.638564	Early								Ptpn7	Mapk11	0.614463
Wdr12	0.638564	Predicted								Csnk2a1	Gch1	0.613721
Pold4	0.637256	Early								Rela	Il27	0.613269
Pold2	0.637256	Predicted								Ripk3	Mlkl	0.612831
Rasd1	0.634447	Predicted								Nmi	Ifi35	0.610999
Cenpb	0.634447	Early								Usp16	Cdk1	0.610835
Hbegf	0.631633	Early								Prkaca	Ppp2ca	0.610489
Plec	0.628549	Early								Id3	Csk	0.607655
Col4a6	0.626917	Predicted								Csk	Hck	0.607655
Cav2	0.624259	Early								Vcam1	Lgals3	0.607242
Slc7a8	0.623372	Late								Tnf	Vcam1	0.607242
Csnk2b	0.619308	Predicted								Selenbp1	Mlh1	0.604646
Bid	0.619308	Early								Cdh1	AC160982.1	0.603038
Siva1	0.616173	Early								Sigmar1	Ank2	0.603038
Abl2	0.616173	Predicted								Ank2	Cdh1	0.603038
Nrg1	0.615845	Early								Tsc22d3	Raf1	0.602293
Cd3d	0.615334	Predicted								Nme1	Itgb1	0.598029
Herpud1	0.615334	Early								Birc2	Birc3	0.595108
Cyth1	0.615331	Early								Stk4	Rassf3	0.5947
Ptpn7	0.614463	Early								Sirt1	Stk4	0.5947
Taok2	0.611238	Early								Capn2	Atg5	0.591352
Usp16	0.610835	Early								Atg5	Ddx58	0.591352
Id3	0.607655	Early								Nlrp10	Casp1	0.591174
Csk	0.607655	Predicted								Il1b	Nlrp10	0.591174
Vcam1	0.607242	Predicted								Slbp	Cdk4	0.591075
Selenbp1	0.604646	Early								Cdk4	Cebpa	0.591075
Ank2	0.603038	Predicted								Ets2	Ep300	0.590682
Cdh1	0.603038	Late								Cxcl2	Ccr5	0.587925
Sigmar1	0.603038	Early								Nfil3	Dr1	0.587734
Raf1	0.602293	Predicted								Psmb7	Psmb8	0.586709
Tsc22d3	0.602293	Early								Lbp	Camp	0.584693
Nme1	0.598029	Early								Cd14	Lbp	0.584693
Birc2	0.595108	Early								Sos1	Cav1	0.583112
Sirt1	0.5947	Early								Nfkbia	Jak2	0.582644
Stk4	0.5947	Predicted								Jak2	Stat2	0.582644
Atg5	0.591352	Predicted								Mmp9	Fn1	0.582128
Capn2	0.591352	Early								Nub1	Psmd4	0.579051
Nlrp10	0.591174	Predicted								Psmd4	Ube3a	0.579051
Slbp	0.591075	Early								Cd80	Cd274	0.57881
Cdk4	0.591075	Predicted								Ngfr	Cd80	0.57881
Ccr5	0.587925	Intermediate								Maged1	Ngfr	0.57881
Dr1	0.587734	Predicted								Plxna1	Rac1	0.57556
Lbp	0.584693	Predicted								Trib3	Psma3	0.570802
Jak2	0.582644	Intermediate								Ddit3	Trib3	0.570802
Psmd4	0.579051	Predicted								Map3k7	Tgfbr1	0.570423
Nub1	0.579051	Early								Psme2b-ps	Psme2	0.563407
Cd80	0.57881	Intermediate								Atic	Egfr	0.563108
Maged1	0.57881	Early								Tmem132a	Megf10	0.559962
Ngfr	0.57881	Predicted								Rel	Irf8	0.559696
Taf1d	0.578785	Early								Ncor2	Spen	0.559053
Plxna1	0.57556	Early								Rcan1	Irak1	0.556882
Psma3	0.570802	Late								Cir1	Srsf1	0.551365
Ddit3	0.570802	Early								Smarcb1	Myc	0.548029
Trib3	0.570802	Predicted								Vegfa	Kdr	0.547637
Atic	0.563108	Early								Nfkbia	Ikbke	0.54663
Tmem132a	0.559962	Early								Mapk1ip1	Ewsr1	0.546056
Maz	0.558701	Early								Pou4f1	Ly6a	0.546056
Rcan1	0.556882	Early								Ewsr1	Pou4f1	0.546056
Cir1	0.551365	Early								Ptprc	Cd8a	0.544561
Smarcb1	0.548029	Early								Tec	Ptprc	0.544561
Ewsr1	0.546056	Predicted								Snf8	Chmp4b	0.544168
Pou4f1	0.546056	Predicted								Chmp6	Snf8	0.544168
Mapk1ip1	0.546056	Early								Plin2	Abhd5	0.532337
Ptprc	0.544561	Predicted								Abhd5	Plin1	0.532337
Tec	0.544561	Early								Plin1	Prkaca	0.532337
Snf8	0.544168	Predicted								App	Hmox2	0.531564
Chmp6	0.544168	Early								Prkcd	Mmp14	0.527773
Rgl2	0.543909	Early								Ccr5	Cxcl16	0.524944
Abhd5	0.532337	Predicted								Trem1	Tyrobp	0.524774
Plin1	0.532337	Predicted								Tyrobp	Zap70	0.524774
Tyrobp	0.524774	Predicted								Ccnl1	Srsf2	0.524715
Srsf2	0.524715	Predicted								Wt1	Crebbp	0.52195
Gab1	0.520342	Early								Cops2	Irf8	0.520248
Cops2	0.520248	Early								Raf1	Rela	0.519557
Ruvbl1	0.511261	Early								Grb2	Blnk	0.514697
Nfe2l1	0.508622	Predicted								Nfkb1	Nfkbie	0.513917
F10	0.503766	Intermediate								Ruvbl1	Plg	0.511261
Prkg2	0.490033	Predicted								Nfe2l1	Capn1	0.508622
Pts	0.490033	Early								Maff	Nfe2l1	0.508622
Igf1r	0.48415	Late								Capn1	Ptgds	0.508622
Map3k1	0.480557	Early								Il1r2	Traf6	0.508421
Ywhah	0.478896	Predicted								Igfbp7	Cxcl10	0.507145
Rb1	0.476718	Early								Hnf1a	Igfbp7	0.507145
Serpinb2	0.476718	Predicted								F3	F10	0.503766
Rassf4	0.472733	Intermediate								Cntfr	Jak1	0.50164
H2-Oa	0.472562	Early								Ikbke	Ddx58	0.501482
Cdc27	0.465768	Predicted								Il10ra	Jak1	0.49836
Rapgef1	0.460058	Predicted								Zfp36	Hmgb1	0.49806
Gabpa	0.459008	Predicted								Dusp5	Mapk12	0.492305
Cxcr1	0.45894	Predicted								Mlh1	Ptgds	0.491378
Gna15	0.45894	Early								Prkg2	Cd38	0.490033
Srsf3	0.458154	Predicted								Pts	Prkg2	0.490033
Inpp5d	0.45612	Intermediate								Csnk2a1	Hmga1	0.487772
Hap1	0.452791	Predicted								Igf1r	Camp	0.48415
Hras1	0.443118	Early								Igfbp3	Igf1r	0.48415
Jak3	0.441002	Predicted								Map3k1	Rela	0.480557
Ctsb	0.43972	Predicted								Ywhah	Abl1	0.478896
Ubqln4	0.43972	Early								Zfp36	Ywhah	0.478896
Thbs1	0.418027	Predicted								Abl1	Gpx1	0.477858
Cbx2	0.417714	Predicted								Serpinb2	Psmb1	0.476718
Pdcd1	0.406726	Predicted								Rb1	Serpinb2	0.476718
H2-DMb2	0.40001	Early								Rassf4	Rassf3	0.472733
Orm3	0.399663	Predicted								Hmgb1	Rassf4	0.472733
S100a13	0.396292	Predicted								H2-Oa	AC160982.1	0.472562
Syt1	0.396292	Predicted								Prkcd	Ppp2ca	0.472227
Stk38	0.387483	Intermediate								Skil	Cdc27	0.465768
Ctdp1	0.387483	Predicted								Cdc27	Pttg1	0.465768
Vdr	0.377014	Predicted								Cxcr4	Cxcl10	0.460901
Ctnnb1	0.371177	Predicted								Rapgef1	Hck	0.460058
Rras	0.366883	Predicted								Rhoq	Rapgef1	0.460058
Hes1	0.364828	Predicted								Gabpa	Cebpb	0.459008
Ar	0.36119	Predicted								Gabpb1	Gabpa	0.459008
Sumo1	0.359568	Predicted								Cxcr1	Ccl2	0.45894
Csnk2a2	0.35914	Intermediate								Gna15	Cxcr1	0.45894
Fyn	0.356837	Predicted								Srsf3	Pcbp2	0.458154
Il16	0.355868	Predicted								Rbm7	Srsf3	0.458154
Flot1	0.354247	Predicted								Inpp5d	Cd300ld	0.45612
Tceb2	0.351591	Predicted								Gab1	Inpp5d	0.45612
U2af2	0.348396	Predicted								Cd8b1	H2-M2	0.454636
Pomp	0.347986	Late								Taf1d	Hap1	0.452791
Pak1	0.341149	Predicted								Hap1	Hmox2	0.452791
Tfap2c	0.313919	Predicted								Srsf2	Srsf1	0.448635
Tbp	0.30457	Predicted								Hras1	Irak1	0.443118
Pax6	0.301805	Predicted								Il10ra	Jak3	0.441002
Six3	0.301805	Predicted								Jak3	Stat2	0.441002
Ehmt2	0.29924	Predicted								Ncor2	Pml	0.440947
Spib	0.293727	Predicted								Taok2	Megf10	0.440038
Hdac4	0.290379	Predicted								Ubqln4	Ctsb	0.43972
Tab1	0.284929	Predicted								Ctsb	Slpi	0.43972
Hdac3	0.284725	Predicted								Psme2b-ps	Psme1	0.436593
Pdcd6ip	0.283164	Predicted								Psma3	Psma6	0.428917
Ttf2	0.283164	Predicted								Ptpn2	Itga1	0.425486
Irak4	0.279483	Intermediate								Thbs1	Cd47	0.418027
Socs3	0.278311	Intermediate								Tnfaip6	Thbs1	0.418027
Tfdp1	0.278311	Early								Igfbp3	Fn1	0.417872
Eif3d	0.274187	Predicted								Mmp9	Lgals3	0.417872
Gp1ba	0.273894	Predicted								Mdfi	Cbx2	0.417714
Notch4	0.247114	Predicted								Cbx2	H3f3b	0.417714
Psen2	0.244479	Predicted								Hnf1a	Cebpa	0.408925
Emd	0.242043	Predicted								Pdcd1	Cd274	0.406726
Src	0.24128	Intermediate								Ptpn6	Pdcd1	0.406726
AC122425.1	0.230885	Predicted								Nfkb1	Birc3	0.404892
Sfn	0.226914	Predicted								Lck	Cd8a	0.404732
Il2rg	0.220672	Predicted								Klf2	Ep300	0.404336
Rock1	0.217204	Predicted								Cav2	Itgb1	0.401971
Nr1h2	0.211108	Predicted								H2-DMb2	AC160982.1	0.40001
Bag1	0.205071	Predicted								Orm3	Lgals3	0.399663
Rassf1	0.199389	Predicted								Serpine1	Orm3	0.399663
Stk3	0.199389	Predicted								Sos1	Zap70	0.397176
Sdc4	0.198954	Intermediate								Syt1	Irf3	0.396292
Arntl	0.192659	Predicted								Il1a	S100a13	0.396292
Sumo3	0.192659	Predicted								S100a13	Syt1	0.396292
Irf5	0.189669	Predicted								Hist1h2bg	Hdac2	0.393657
Tnks2	0.171201	Predicted								Maz	Jun	0.392672
Rara	0.170259	Predicted								Pgf	Kdr	0.390242
Hmga1-rs1	0.169623	Predicted								Erh	Ctdp1	0.387483
Siglece	0.168122	Late								Stk38	Isg15	0.387483
Ywhaz	0.164506	Predicted								Ctdp1	Stk38	0.387483
Acta1	0.16285	Predicted								Dusp5	Mapk11	0.385537
Gopc	0.146005	Predicted								Cd14	Itgb2	0.384669
Ppara-Rxra	0.145455	Predicted								Ndrg1	Prkaca	0.384139
Hoxd12	0.139326	Predicted								Tnf	Ikbkb	0.380948
Mafg	0.139326	Predicted								Vdr	Camp	0.377015
Skp1a	0.137352	Predicted								Mdfi	Ctnnb1	0.371177
Ptn	0.125994	Predicted								Ctnnb1	Lgals3	0.371177
Sdc1	0.125994	Late								Psmc5	Vdr	0.370892
Col4a3	0.118561	Predicted								Sgk1	Gsk3b	0.367578
Pgrmc1	0.11186	Predicted								Rras	Ppp2ca	0.366883
Scap	0.11186	Predicted								Rgl2	Rras	0.366883
F2	0.109388	Predicted								Adrb2	Nos1	0.365553
Mtor	0.102334	Predicted								Id2	Hes1	0.364828
Med21	0.101692	Early								Actb	Itga1	0.361506
Pard6a	0.0922116	Predicted								Pnrc1	Ar	0.36119
Socs7	0.089701	Predicted								Ar	Ube3a	0.36119
Pou5f1	0.076507	Predicted								Hipk2	Sumo1	0.359568
Sip1	0.0760798	Predicted								Fyn	Fcer1g	0.356837
Map2k4	0.0727377	Predicted								Il16	Cd9	0.355868
Vcp	0.0707987	Predicted								Gabpb1	Il16	0.355868
Tfpi	0.0634241	Predicted								Flot1	Arg1	0.354247
Cd4	0.0613878	Predicted								App	Flot1	0.354247
Ddx3x	0.0606526	Predicted								Egr1	Ep300	0.352289
Phb	0.0492521	Early								Tceb2	Socs1	0.351591
Fpr-rs3	0.0491622	Predicted								Wsb1	Tceb2	0.351591
Psma4	0.0479948	Late								Sgk1	Gsk3a	0.34919
Nomo1	0.0465868	Early								U2af2	Ddx6	0.348396
Gipc1	0.0327921	Predicted								Wt1	U2af2	0.348396
Actg1	0.0297182	Predicted								Psmb6	Pomp	0.347986
Cfhr1	0.0233784	Predicted								Pomp	Psmb9	0.347986
Prkcz	0.0201315	Predicted								Egfr-Egfr	Cbl	0.343705
Srf	0.0196122	Predicted								Pak1	Cybb	0.341149
Traf4	0.0073839	Predicted								Bad	Pak1	0.341149
Mapk3	0.00612226	Predicted								Nfkb2	Birc7	0.336913
Kat2b	0.00352864	Predicted								F10	Plg	0.330954
										Stat3	Ly6a	0.3305
										Grb2	Sh2d1a	0.324565
										Psmc5	Ikbkap	0.319973
										Fos	Il12a	0.316615
										Il1rap	Pik3r1	0.315585
										Cited2	Tfap2c	0.313919
										Tfap2c	Ube2i	0.313919
										Ptpn2	Stat1	0.311362
										Ccr1l1	Cxcl10	0.310674
										Erh	Csnk2a2	0.310456
										Tbp	Pou2f2	0.30457
										Dr1	Tbp	0.30457
										Hipk2	Pax6	0.301805
										Pax6	Six3	0.301805
										Six3	Tle3	0.301805
										Prdm1	Ehmt2	0.29924
										Ehmt2	H3f3b	0.29924
										Psmb1	Psmb7	0.298929
										Cd8b1	H2-Bl	0.293811
										Spib	Cebpb	0.293727
										Irf4	Spib	0.293727
										Hist1h2bg	Hdac4	0.290379
										Hdac4	Stat3	0.290379
										Psmb6	Psmb7	0.28778
										Il1r2	Tab1	0.284929
										Tab1	Tgfbr1	0.284929
										Klf6	Hdac3	0.284725
										Pdcd6ip	Chmp4b	0.283164
										Ttf2	Pdcd6ip	0.283164
										Dr1	Ttf2	0.283164
										Cxcr2	Ccl2	0.282012
										Sumo1	Irf7	0.281218
										Hist1h1c	Irak4	0.279483
										Irak4	Irf7	0.279483
										Socs3	Il15ra	0.278311
										Tfdp1	Socs3	0.278311
										Eif3d	Eif3c	0.274187
										Phlda1	Eif3d	0.274187
										Gp1ba	Tpst1	0.273894
										Myc	Mxd1	0.272219
										Cdk1	Hmga1	0.270275
										Klf2	Wwp1	0.262991
										Nfkb1	Txn1	0.258743
										Cbl	Il21r	0.257843
										Csf3r	Hck	0.255206
										Eif3c	Anxa6	0.249962
										Hist1h1c	Eif2ak2	0.248195
										A2m	Tgfbi	0.247271
										Notch4	Dtx2	0.247115
										Csnk2a2	Ptpn1	0.246724
										Psen2	Notch4	0.244479
										Cflar	Psen2	0.244479
										Hdac3	Emd	0.242043
										Emd	Psme1	0.242043
										Ikbkg	Cd40	0.241694
										Src	Fyb	0.24128
										Nfkbia	Src	0.24128
										Irf3	Hmox1	0.238194
										Egfr	AC122425.1	0.230885
										AC122425.1	S100a9	0.230885
										Lmnb1	Vim	0.227938
										Hes1	Stat3	0.227188
										Sfn	Map3k5	0.226914
										Zfp36	Sfn	0.226914
										Cav2	Fyn	0.222288
										Il2rg	Il15	0.220672
										Pik3r1	Il2rg	0.220672
										Brms1	Nmi	0.218614
										Rock1	Rhoc	0.217204
										Rnd3	Rock1	0.217204
										Cdk1	Pttg1	0.215636
										Mdfi	Nr1h2	0.211108
										Nr1h2	Rxrg	0.211108
										Map3k8	Ikbkg	0.205281
										Psma7	Psma5	0.205199
										Ppp1r15a	Bag1	0.205071
										Bag1	Hspa8	0.205071
										Stk3	Gbp2	0.199389
										Moap1	Rassf1	0.199389
										Rassf1	Stk3	0.199389
										Sdc4	Ccl5	0.198954
										Bhlhe40	Arntl	0.192659
										Sumo3	Irf3	0.192659
										Arntl	Sumo3	0.192659
										Irf5	Ccl5	0.189669
										Traf6	Irf5	0.189669
										Fosl2	Jun	0.182028
										Ptpn1	Glrx	0.17971
										Syk	AC160982.1	0.177822
										Rgl2	Rac1	0.177026
										Ptpn6	Pilrb1	0.173899
										Erbb2	Itga5	0.173682
										Taok2	Tnks2	0.171201
										Tnks2	Usp25	0.171201
										Rxrb	Fabp3	0.170259
										Btg1	Rara	0.170259
										Rara	Rxrb	0.170259
										Hipk2	Hmga1-rs1	0.169623
										Hmga1-rs1	Sufu	0.169623
										Cntfr	Crk	0.16807
										Fgfr1	Nedd4	0.16807
										Cask	Sdc4	0.166162
										Maz	Csnk2a1	0.166029
										Ywhaz	Gp1ba	0.164506
										Nr4a1	Ywhaz	0.164506
										Mki67	Cdk1	0.163743
										Pfn1	Acta1	0.16285
										Acta1	Usp25	0.16285
										Grb2	Siglece	0.160738
										Gnai1	Cd47	0.159164
										Serpine1	Plg	0.157785
										Hipk2	Trp53	0.157254
										Pcbp2	Ddx58	0.156627
										Crebbp	Ifnar2	0.152763
										Gopc	Cftr	0.146005
										Rhoq	Gopc	0.146005
										Ppara-Rxra	Acsl1	0.145455
										Gadd45g	Ppara	0.145455
										Ppara	Ppara-Rxra	0.145455
										Psma3	Psma2	0.141885
										Psma2	Psmb10	0.141885
										Maff	Hoxd12	0.139326
										Mafg	Maf	0.139326
										Hoxd12	Mafg	0.139326
										Hes1	Foxg1	0.13764
										Skp1a	Cdkn1a	0.137352
										Ccng2	Skp1a	0.137352
										Btg1	Prmt1	0.135033
										Smad3	Cdkn1a	0.135005
										Cntfr	Fyn	0.134549
										Irf4	Traf6	0.13419
										Mapk1	Map2k1	0.133734
										Crebbp	Matk	0.13311
										Dusp1	Mapk14	0.132978
										Arhgef3	Rhoa	0.132436
										Sdc1	Ccl5	0.125994
										Taf1d	Ptn	0.125994
										Ptn	Sdc1	0.125994
										Lmnb1	Plec	0.123578
										Osm	Col4a3	0.118561
										Col4a3	Tgfbi	0.118561
										Tlr4	Hspa8	0.115952
										Traf2	Trafd1	0.114663
										E030030I06Rik	Ppp2ca	0.114351
										Mlh1	Ckb	0.113267
										Nfkb1	Atf3	0.113229
										Csnk2a2	Hmga1	0.112417
										Pgrmc1	Calr	0.11186
										Scap	Pgrmc1	0.11186
										Insig1	Scap	0.11186
										F10	F2	0.109388
										F2	Gp1ba	0.109388
										Egfr	Casp7	0.108751
										Prnp	Notch1	0.108688
										Tnf	Mtor	0.102334
										Mtor	Pml	0.102334
										Med21	Brca1	0.101692
										Brca1	Nmi	0.101692
										Hdac2	Spen	0.0978991
										Sh2b2	Cbl	0.097575
										Rhoq	Pard6a	0.0922116
										Pard6a	Tgfbr1	0.0922116
										H2-T23	Tapbp	0.0907252
										Elane	Camp	0.0905488
										Socs7	Il15ra	0.089701
										Irs2	Socs7	0.089701
										Gsk3b	Ifngr1	0.0891109
										Raf1	Il2rb	0.0827355
										Vegfa	Akt1	0.0820182
										Sumo1	Maf	0.0783506
										Pou5f1	Abl1	0.076507
										Nanog	Pou5f1	0.076507
										Srsf2	Sip1	0.0760798
										Sip1	Stxbp3a	0.0760798
										Map2k4	Cd40	0.0727377
										Trib1	Map2k4	0.0727377
										Cenpa	H3f3a	0.0726867
										Gnaq	Slc9a3r1	0.0721585
										Vcp	Ppp2ca	0.0707987
										Dusp1	Vcp	0.0707987
										Cd8a	H2-Bl	0.0705652
										Btg2	Smad1	0.0671343
										Gab1	Ptpn11	0.0642211
										Tfpi	Mmp8	0.0634241
										F10	Tfpi	0.0634241
										Ccr5	Tpst1	0.0629819
										Cd4	Cd38	0.0613878
										H2-Aa	Cd4	0.0613878
										Ddx5	Ddx3x	0.0606526
										Ddx3x	Ddx58	0.0606526
										Prkaca	Atf3	0.0547736
										Map3k7	Mavs	0.0526723
										Phb	E2f1	0.0492521
										Fpr-rs3	Fpr2	0.0491622
										Camp	Fpr-rs3	0.0491622
										Sat1	Csnk2a2	0.0486842
										Csnk2a1	Psma4	0.0479948
										Psma4	Psmb1	0.0479948
										Nomo1	Shbg	0.0465868
										Ikbke	Rhoc	0.0464431
										Hdac3	Stat3	0.0426823
										Dusp1	Mapk8	0.0396694
										Mapk8	Stat3	0.0396694
										Tnfrsf1a	Casp7	0.0370932
										Rgs1	Gipc1	0.0327921
										Gipc1	Sdc4	0.0327921
										Fcgr2b	Sh2d1a	0.0310914
										Pfn1	Actg1	0.0297182
										Actg1	Anxa5	0.0297182
										Crebbp	Hmga1	0.0261283
										Hmgb1	Irf2	0.0253275
										Junb	Sfpi1	0.0237741
										Cfhr1	C3	0.0233784
										Adm	Cfhr1	0.0233784
										Tnfaip3	Ikbkg	0.0231263
										Psma7	Psma6	0.0205856
										Nfkbia	Prkcz	0.0201315
										Prkcz	Stxbp3a	0.0201315
										Srf	Hmga1	0.0196122
										Hopx	Srf	0.0196122
										Dusp4	Mapk14	0.0185097
										Tubb5	Il7r	0.0173233
										Ndn	Egfr	0.0168282
										Csnk2a1	Hcls1	0.0165412
										Dusp2	Mapk12	0.0103448
										Traf4	Siglece	0.0073839
										Tnfrsf9	Traf4	0.0073839
										Zfp36l1	Mapk3	0.00612226
										Mapk3	Vdr	0.00612226
										Kat2b	Hmga1	0.00352864
										Hipk2	Kat2b	0.00352864
										Smad3	Notch4	0.00263521
