# Supplementary material for: Linking Transcriptional Changes over Time in Stimulated Dendritic Cells to Identify Gene Networks Activated during the Innate Immune Response
Source: PLoS Comput Biol. 2013 Nov 7;9(11):e1003323. doi: 10.1371/journal.pcbi.1003323 (PMC3820512; doi:10.1371/journal.pcbi.1003323)
Supplement: Table S10 — Genes and edges identified in the optimal sub-network for activated MyD88-knockout dendritic cells by the proposed method. (XLSX) [file pcbi.1003323.s018.xlsx]

## Sheet: Optimal network - MyD88 KO
Supporting Table S10 A. Identified genes for MyD88 knockout DCs											Supporting Table S10 B. Optimal edges
Gene	Flow	Type	Significance		Type	Time of greatest fold change in expression:					Gene 1	Gene 2	Flow
Akt3	41.2037	Intermediate	0		Early	0.5-1 hrs					Vta1	2610002M06Rik	1
Pik3r5	31.22	Intermediate	0		Intermediate	2-4 hrs					Rabgef1	2810422J05Rik	1
Casp8	16.7525	Intermediate	0		Late	6-8hrs					Actr2	Abcd3	0.301205
Stat2	13.1328	Intermediate	0.0008		Predicted	No detectable change in expression					Lrrc59	Abcd3	0.698794
Pxn	10.044	Predicted	0								Spag7	Abhd16a	0.776171
Git1	10.044	Intermediate	0.0004								Ncstn	Abl1	1
Cdk2	7.17695	Intermediate	0								Ccnd3	AC122379.1	0.207277
Rhot1	7	Late	0								Adss	Acta1	0.843328
Cry1	6.83278	Late	0								Cct4	Acta1	0.156672
Arhgef6	5.94897	Predicted	0								Myl12b	Actb	0.285846
Ppp2r5a	5.16576	Intermediate	0								Arpc5	Actg1	0.28585
Nfkbia	4.81644	Predicted	0								Myl12b	Actg1	0.714154
Casp9	4.68786	Predicted	0								Csrp1	Actn1	0.531813
Rela	4.58915	Predicted	0								Actr3	Actr2	0.396189
Casp3	4.56376	Predicted	0								Ikbkg	Adap2	1
Sumo1	4.52088	Intermediate	0								Nedd4l	Adap2	1
Arrb2	4.28153	Intermediate	0								Prnp	Adap2	1
Tnfaip3	4.16079	Early	0								Snca	Adap2	1
Arhgef7	4.09498	Predicted	0								Rnf216	Agfg1	0.423429
Adap2	4	Late	0.0004								Vamp7	Agfg1	0.57701
Cct4	3.88042	Intermediate	0								Pik3r5	Akt1	1.21234
Stat5a	3.77261	Late	0								Ppp2r5a	Akt1	2.39882
Ddx50	3.76899	Late	0.0002								Pik3r5	Akt2	1.21234
Mis12	3.63738	Early	0								Ppp2r5a	Akt2	0.77419
Akt1	3.61116	Predicted	0								Ilk	Akt3	1.58669
Egr2	3.44603	Late	0.0002								Pdk1	Akt3	1.58669
Drd2	3.39882	Predicted	0								Pik3ca	Akt3	1.58669
Vta1	3.34228	Early	0								Pik3cb	Akt3	1.58669
Sumo3	3.27428	Intermediate	0								Pik3cd	Akt3	1.58669
Ppp3r1	3.25573	Intermediate	0								Pik3cg	Akt3	1.58669
Cd247	3.22975	Predicted	0								Pik3r1	Akt3	1.58669
Cd3e	3.22975	Predicted	0.0006								Pik3r2	Akt3	1.58669
Nfkb1	3.22975	Predicted	0.0002								Pik3r3	Akt3	1.58669
Egfr	3.21233	Predicted	0								Pik3r5	Akt3	1.39952
Cops5	3.14587	Early	0								Ppp2ca	Akt3	1.12534
Spop	3.0497	Late	0.0002								Ppp2cb	Akt3	1.58669
Chuk-Ikbkb-Ikbkg	3	Predicted	0.0016								Ppp2r1a	Akt3	1.58669
Cyct	3	Predicted	0.0014								Ppp2r1b	Akt3	1.58669
Ift20	3	Late	0.0006								Ppp2r2a	Akt3	1.58669
Ikbkg	2.99356	Predicted	0								Ppp2r2b	Akt3	1.58669
Map2k2	2.97072	Intermediate	0								Ppp2r2c	Akt3	1.58669
Psmd11	2.96137	Early	0								Ppp2r2d	Akt3	1.58669
Ppp2r1a	2.92476	Predicted	0								Ppp2r3a	Akt3	1.58669
Ppp2r2a	2.92476	Predicted	0								Ppp2r3c	Akt3	1
Ppp2r2b	2.92476	Predicted	0								Ppp2r5a	Akt3	1.99276
Usp15	2.92116	Late	0.0012								Ppp2r5b	Akt3	1.58669
Gsk3b	2.79903	Predicted	0								Ppp2r5c	Akt3	1.58669
Mtor	2.79903	Predicted	0.0008								Ppp2r5d	Akt3	1.58669
Cul3	2.7981	Early	0.001								Ppp2r5e	Akt3	1.58669
Rtn4	2.79537	Late	0.0016								Pten	Akt3	1.58669
Ptprc	2.71462	Late	0								Tsc2	Akt3	0.778854
Metap2	2.6795	Early	0								Hif1a	Aldoc	1
Ppp2ca	2.65674	Intermediate	0								Pttg1	Anapc16	0.0256188
Fn1	2.62828	Late	0								Eif3c	Anxa6	0.770932
Chuk	2.58669	Predicted	0								Arrb2	Ap2m1	0.734276
Ikbkb	2.58669	Predicted	0								Scarb2	Ap3s1	0.289647
Ppp1ca	2.58669	Predicted	0								Ncstn	Aph1c	0.592997
Hspd1	2.54166	Late	0.0002								Atp5b	Apoa1	0.999996
Stfa3	2.53587	Early	0.0004								Gpc1	App	0.888868
Ptges3	2.51971	Late	0								Mybbp1a	Ar	0.290556
Mdm2	2.50915	Intermediate	0								Pxn	Ar	0.709444
Bloc1s1	2.4872	Late	0.0004								Pip5k1c	Arf6	0.789473
Irak3	2.4585	Late	0.0004								Rac2	Arf6	0.210527
Ppp2r2d	2.39289	Predicted	0.0006								Flot1	Arg1	0.70427
Atic	2.3508	Late	0.0018								Nos1	Arg1	0.849807
Ep300	2.31099	Predicted	0								Arrb2	Arhgef6	0.8788
Psap	2.28965	Early	0.0012								Cdc42	Arhgef6	1
Adora2a	2.23664	Early	0								Hras1	Arhgef6	0.212337
Sgol1	2.11239	Predicted	0								Kras	Arhgef6	0.212337
Mapk14	2.08717	Predicted	0								Mdm2	Arhgef6	0.836385
Mars	2.08189	Intermediate	0								Nras	Arhgef6	1
Glul	2.08152	Early	0.0002								Pak1	Arhgef6	0.723779
Itgb2	2.06865	Late	0								Pak2	Arhgef6	0.0237681
Snrpd3	2.06158	Late	0.0002								Pak3	Arhgef6	1
Cdc42	2.04311	Predicted	0								Pak6	Arhgef6	0.0615607
Vdac1	2.04291	Early	0								Cdc42	Arhgef7	1
Rac1	2	Predicted	0								Pak2	Arhgef7	1
Cep170	2	Late	0.0012								Pxn	Arhgef7	1
Cycs	2	Predicted	0.0072								Rac1	Arhgef7	1
Dgkd	2	Late	0.0034								Was	Arhgef7	0.0949834
Eif3c	2	Predicted	0								Unc119	Arl2	0.338355
Gls	2	Late	0.0026								Sumo3	Arntl	0.953002
Gm10053	2	Predicted	0.0058								Ube2i	Arntl	0.0469983
Gm2a	2	Late	0.0018								Csnk1d	Arntl-Clock	0.832776
Lck	2	Predicted	0								Wasf3	Arpc5	0.285846
Nek7	2	Late	0.005								Akt1	Arrb2	0.8788
Slu7	2	Late	0.0004								Eftud2	Arrb2	0.53786
Tradd-Fadd	2	Predicted	0								Htatsf1	Arrb2	0.8788
Akt2	1.98653	Predicted	0								Nfkbia	Arrb2	0.8788
Cs	1.95638	Late	0.0002								Rab5c	Arrb2	0.120707
Nufip2	1.953	Late	0.0008								Scyl2	Arrb2	0.808972
Sar1a	1.95101	Early	0.0004								Xrcc5	Arrb2	0.177594
Rab10	1.95074	Early	0.001								Snw1	Ascc2	0.424239
Osm	1.93369	Early	0								Nod1	Atg16l1	0.322494
Reps1	1.92247	Early	0								Nod2	Atg16l1	0.698786
Ngfr	1.90054	Predicted	0								Cdk2	Atic	1.22633
Peli1	1.88364	Early	0.0002								Egfr	Atic	1
Ppp2cb	1.87075	Predicted	0.0002								Ikbke	Atic	0.124466
Lamc1	1.84091	Late	0.0034								Gabarap	Atp5b	0.12626
Irak1	1.82481	Predicted	0								Ict1	Atp5b	0.873732
Btk	1.78947	Predicted	0								Gsk3b	Axin1	0.173386
Mybbp1a	1.78127	Early	0								Gsk3b	Axin2	1
Fcgr3	1.77669	Late	0.0038								Psap	Bace1	1
Srrm2	1.76899	Predicted	0								Akt3	Bad	0.944139
F11r	1.76825	Early	0								Ppp3r1	Bad	0.0558609
Pip5k1c	1.75207	Intermediate	0								Vdac1	Bak1	0.0530974
Trp53	1.71463	Late	0								Cbx5	Bcl11b	0.887606
Unc119	1.70833	Early	0								Akt3	Bcl2	1.58669
Elk3	1.70638	Late	0.0038								Akt3	Bcl2l1	1.58669
Lrrc59	1.69879	Early	0.0014								Bak1	Becn1	0.0530974
Atg4b	1.66888	Early	0.0026								Bcl2	Becn1	0.586693
Fyn	1.65442	Predicted	0								Bcl2l1	Becn1	0.05401
Csnk2a1	1.64927	Predicted	0								Tlr4	Becn1	0.247857
Stam	1.64121	Predicted	0								Xpo1	Becn1	0.0583425
Timm13	1.64121	Late	0.0018								Gsk3b	Bicd2	0.737061
Irf1	1.63839	Late	0								Mta1	Bloc1s1	0.71071
Mapkapk2	1.62475	Early	0.0052								Notch1	Bloc1s1	0.525624
Dhx58	1.60994	Early	0.0002								Pbx2	Bloc1s1	0.347761
Ncstn	1.593	Early	0.0012								Snapin	Bloc1s1	0.903109
Spag9	1.59109	Late	0.0002								Traf6	Bpnt1	0.124462
Pdk1	1.5867	Predicted	0								Psap	Brca1	1
Pik3cg	1.5867	Predicted	0								Ccna2	Btg1	0.035804
Pik3ca	1.58669	Predicted	0								Rara	Btg1	0.270203
Pik3cd	1.58669	Predicted	0								Thrb	Btg1	1
Hmgb1	1.58669	Predicted	0								Glul	Btk	1
Ilk	1.58669	Predicted	0								Pip4k2c	Btk	0.789473
Pik3cb	1.58669	Predicted	0								Prrc2a	C1qbp	0.0461339
Pik3r1	1.58669	Predicted	0								Stk11	Cab39	0.862232
Pik3r2	1.58669	Predicted	0								Adora2a	Calm2	1
Pik3r3	1.58669	Predicted	0								App	Calr	0.184598
Ppp2r1b	1.58669	Predicted	0								Il7r	Calr	0.0493343
Ppp2r2c	1.58669	Predicted	0.0002								Itga2b	Calr	0.622061
Ppp2r3a	1.58669	Predicted	0.002								Ifngr1	Canx	0.875647
Ppp2r5b	1.58669	Predicted	0.0008								Casp9	Capn2	1
Ppp2r5c	1.58669	Predicted	0.0018								Nfkbia	Capn2	0.211858
Ppp2r5e	1.58669	Predicted	0.0006								AC122379.1	Casc3	0.04039
Pten	1.58669	Predicted	0.0004								Sdc1	Cask	0.850858
Ppp2r5d	1.58669	Predicted	0								Cycs	Casp3	1
Bcl2	1.58669	Predicted	0								Cyct	Casp3	1
Bcl2l1	1.58669	Predicted	0								Cyct-Apaf1-Casp9	Casp3	1
Cdkn1a	1.58669	Predicted	0								Gm10053	Casp3	1
Cdkn1b	1.58669	Predicted	0								Ndufs1	Casp3	0.563757
Irf3	1.58669	Predicted	0								Srp72	Casp6	0.844378
Jun	1.58669	Predicted	0								Mybbp1a	Casp7	0.640906
Map3k5	1.58669	Predicted	0.001								Cd247	Casp8	3.22975
Map3k8	1.58669	Predicted	0.0002								Cd3d	Casp8	0.875647
Nfkbib	1.58669	Predicted	0.0008								Cd3e	Casp8	3.22975
Nfkbie	1.58669	Predicted	0.0008								Cd3g	Casp8	0.95785
Nos3	1.58669	Predicted	0								Nfkb1	Casp8	3.22975
Ppp1cb	1.58669	Predicted	0								Rela	Casp8	3.22975
Ppp1cc	1.58669	Predicted	0								Tradd-Fadd	Casp8	2
Rps6kb1	1.58669	Predicted	0								Akt3	Casp9	0.475516
Rps6kb2	1.58669	Predicted	0.0016								Cycs	Casp9	1
Sec63	1.58394	Late	0.0004								Cyct	Casp9	1
Ube2n	1.57416	Late	0								Gm10053	Casp9	1
Ndufs1	1.56376	Early	0.0006								Pik3r5	Casp9	1.21234
Arg1	1.55408	Late	0.0042								Pxn	Cbl	1
Hist3h2a	1.53743	Late	0.0004								Mis12	Cbx5	1
Pnkd	1.53694	Early	0.002								Chchd3	Ccdc85b	1
Pld2	1.53181	Late	0								Fzr1	Ccna2	0.035804
Csrp1	1.53181	Early	0.0022								Anapc16	Ccnb1	0.02562
Rnf2	1.52122	Early	0								Stat2	Ccnd1	1.33806
Sgk1	1.51138	Intermediate	0								Stat2	Ccnd2	1.33806
Nr3c2	1.51138	Predicted	0								Stat2	Ccnd3	1.33806
Ncl	1.48754	Late	0								Aff4	Ccnt1	0.158842
Sqstm1	1.48297	Intermediate	0								Cdk9	Cct4	0.930937
Cd24a	1.46469	Late	0.0058								Map1lc3a	Cct4	0.930937
Cnot2	1.45455	Late	0.0018								Ppp2r4	Cct4	0.930937
Pias4	1.4402	Early	0								Psma3	Cct4	0.225377
Cops8	1.43745	Intermediate	0								Vhl	Cct4	0.862232
Gsk3a	1.43531	Predicted	0								Casp3	Cd247	1
Tuba4a	1.418	Early	0.0006								Grb2	Cd247	1
Rps12	1.40687	Early	0.0012								Gzmc	Cd247	0.323343
Cdc73	1.40461	Late	0								Ptpn6	Cd247	0.906407
Myc	1.38947	Predicted	0								Hmgb1	Cd24a	1
Ptpn6	1.3711	Predicted	0								Siglecg	Cd24a	0.464689
Drg2	1.34772	Intermediate	0								Itk	Cd28	1
Rwdd1	1.34772	Late	0								Canx	Cd3d	0.875647
Max	1.34771	Predicted	0								Fyn	Cd3e	0.442087
Pias1	1.33806	Predicted	0								Lck	Cd3e	0.787663
Cish	1.33806	Predicted	0.0002								Shc1	Cd3e	1
Jak3	1.33806	Predicted	0.0024								Unc119	Cd3e	1
Pias2	1.33806	Predicted	0								Syk	Cd3g	0.95785
Pias3	1.33806	Predicted	0								Ppp3r1	Cdc16	1
Ccnd1	1.33806	Predicted	0								Cdk2	Cdc25c	1
Ccnd2	1.33806	Predicted	0.0016								Ppp3r1	Cdc27	1
Ccnd3	1.33806	Predicted	0.0002								Metap2	Cdc42	0.830765
Pim1	1.33806	Predicted	0								Pik3r5	Cdc42	1.21234
Socs1	1.33806	Predicted	0								Ranbp2	Cdc73	0.886612
Socs4	1.33806	Predicted	0								Ube2b	Cdc73	0.518002
Socs5	1.33806	Predicted	0								Ccnb1	Cdk2	0.02562
Socs7	1.33806	Predicted	0								Ccnd1	Cdk2	0.433198
P4ha2	1.32486	Early	0.0028								Ccnd2	Cdk2	1.22633
Traf2	1.30947	Predicted	0								Cdkn1a	Cdk2	1.22633
Btg1	1.30601	Late	0.0012								Cdkn1b	Cdk2	1.22633
Nlrp3	1.30121	Late	0.002								Fzr1	Cdk2	1.22633
Sar1b	1.29547	Late	0.0034								Ppp1cc	Cdk2	1.22633
Irs1	1.28965	Predicted	0								Ubtf	Cdk2	0.586485
Ptma	1.27977	Intermediate	0								Vta1	Cdk4	0.697705
Trim11	1.27889	Late	0.0038								Aff4	Cdk9	1
Sap30l	1.27735	Early	0.0006								Akt3	Cdkn1a	1.58669
Map3k1	1.27722	Predicted	0								Akt3	Cdkn1b	1.58669
Ly9	1.27077	Late	0.0026								Ppp1ca	Cep170	1
Rara	1.2702	Predicted	0								Tnks2	Cep170	1
Psmb6	1.26239	Late	0.001								Casp6	Cflar	0.844378
Fzr1	1.26213	Early	0.0034								Ikbkb	Cflar	0.0655077
Slc9a3r1	1.25166	Early	0.001								Ppp1ca	Chchd3	1
Mapk3	1.2489	Predicted	0								Vta1	Chmp1a	0.644576
Ctdsp1	1.24857	Early	0.0042								Snf8	Chmp4b	0.628335
Map3k3	1.24547	Intermediate	0								Akt3	Chuk	1.58669
Eif5b	1.24157	Late	0.004								Chuk-Ikbkb-Ikbkg	Chuk	1
Xbp1	1.23468	Early	0.0064								Casp8	Chuk-Ikbkb-Ikbkg	3
Csnk2a2	1.22633	Predicted	0								Nfkbia	Cish	1
Ndufs7	1.22038	Early	0.0034								Socs2	Cish	0.338063
Smarcb1	1.21921	Early	0.0002								Ascc2	Ckap4	0.424239
Copa	1.21729	Late	0								Mlh1	Ckap4	0.359243
Dnm1	1.21234	Predicted	0.0004								Rara	Clock	1
Dnm2	1.21234	Predicted	0.003								Pparg	Cnot1	0.45455
Hras1	1.21234	Predicted	0.0002								Cnot1	Cnot2	0.45455
Itk	1.21234	Predicted	0.001								Ncor2	Cnot2	1
Kras	1.21234	Predicted	0								Osm	Col4a1	0.559334
Nras	1.21234	Predicted	0.0006								Osm	Col4a5	1
Pdpk1	1.21234	Predicted	0.0002								Mlh1	Copa	0.367486
Prkci	1.21234	Predicted	0								Sumo1	Copa	0.849807
Prkcz	1.21234	Predicted	0								Mif	Cops5	0.0890717
Ptk2	1.21234	Predicted	0.0008								Mif	Cops6	1
Rac2	1.21234	Predicted	0.0052								Cops5	Cops8	0.785215
Rac3	1.21234	Predicted	0.0068								Cops6	Cops8	0.652238
Slc2a4	1.21234	Predicted	0.0018								Csnk2a1	Cpsf6	0.649271
Txk	1.21234	Predicted	0.002								Relb	Cpsf6	0.374501
Flt3	1.21234	Predicted	0								Ptma	Crebbp	0.12276
Irs3	1.21234	Predicted	0.005								Sertad2	Crebbp	0.763241
Irs4	1.21234	Predicted	0.0028								Fasl	Crk	0.641554
Itgb2l	1.21234	Predicted	0								Ppp1ca	Crk	0.441874
Jak1	1.21234	Predicted	0								Mapk9	Crkl	0.0769809
Jak2	1.21234	Predicted	0								Arntl	Cry1	1
Kit	1.21234	Predicted	0								Arntl-Clock	Cry1	0.832776
Lyn	1.21234	Predicted	0.0002								Clock	Cry1	1
Pdgfra	1.21234	Predicted	0								Csnk1e	Cry1	1
Src	1.21234	Predicted	0								Npas2	Cry1	1
Traf1	1.21234	Predicted	0								Per2	Cry1	1
Traf3	1.21234	Predicted	0								Per3	Cry1	1
Igf1r	1.21234	Predicted	0								Bcl2l1	Cryaa	0.532683
Gnai1	1.21234	Predicted	0								Cryaa	Cs	0.532683
Capn2	1.21186	Late	0.0008								Mdh2	Cs	1
Ptpn11	1.20995	Predicted	0								Sgk1	Cs	0.4237
Plcg2	1.19987	Predicted	0								Socs2	Csf2rb	0.414129
Nfat5	1.19987	Predicted	0.0018								Bace1	Csnk1d	0.0560899
Plcg1	1.19987	Predicted	0.0002								Ctnnb1	Csnk1e	0.163615
Ndufs2	1.19537	Early	0.002								Mdm2	Csnk1e	0.836385
Traf6	1.17416	Predicted	0								Cdk2	Csnk2a1	1.22633
Ict1	1.16602	Intermediate	0								Sirt1	Csnk2a1	0.42294
Aff4	1.15884	Early	0.0044								Cdk2	Csnk2a2	1.22633
Pak1	1.14004	Predicted	0								Cdk2	Csnk2b	1
Pfdn2	1.11658	Early	0.0022								Ctsd	Cstb	0.0790608
Atg5	1.10187	Early	0								Ctsh	Cstb	1
Lasp1	1.09489	Late	0								C1qbp	CT009575.1	0.0461339
Socs2	1.09025	Intermediate	0								Rgs2	CT009575.1	0.535866
Mif	1.08907	Early	0.002								Tuba4a	CT009575.1	0.418
Llgl1	1.08521	Late	0.0046								Foxo1	Ctnnb1	0.163615
Crk	1.08343	Late	0.0008								Pip5k1c	Ctnnd1	0.962595
Cstb	1.07906	Late	0.0056								Stfa3	Ctsb	0.535866
Stat6	1.07575	Late	0.0006								Atp6v0a1	Ctsd	0.98213
Hspa1l	1.05641	Late	0								Stfa3	Ctsh	1
Supt4h1	1.05639	Early	0.006								Cops8	Cul1	0.01607
Mnt	1.05141	Early	0.0042								Ccl4	Cxcr1	0.185418
Mapk1	1.05089	Predicted	0								Ccl4	Cxcr2	0.131962
Il7r	1.04933	Predicted	0								Ccl6	Cxcr2	0.868038
Prdx6	1.04933	Early	0.0036								Ccl4	Cxcr4	0.465317
Ube2d1	1.02436	Early	0.0006								Casp8	Cycs	2
Dnajb2	1.02435	Intermediate	0								Casp8	Cyct	3
Cpsf6	1.02377	Intermediate	0								Cyct	Cyct-Apaf1-Casp9	1
Pak2	1.02377	Predicted	0								Adora2a	Cyth2	0.236638
Atg16l1	1.02128	Late	0.0022								Slc2a4	Daxx	1
Vamp2	1.01885	Early	0.0002								Hspa4	Ddit4	0.778856
Rnf126	1.00709	Late	0.0006								Dot1l	Ddx21	0.111417
Sirt1	1.00116	Early	0.0002								Kras	Ddx50	1
Agfg1	1.00044	Late	0.0018								Pinx1	Ddx50	1
Actg1	1	Late	0								Smndc1	Ddx50	1
Grin1	1	Predicted	0								Srrm2	Ddx50	0.768995
Grin2d	1	Predicted	0								Dhx58	Ddx58	1
Inpp5k	1	Intermediate	0								Egfr	Degs1	1
Ncor2	1	Predicted	0								Myh2	Dgkd	1
Hip1	1	Predicted	0								Prkca	Dgkd	1
Arntl	1	Predicted	0								Ube2d1	Dnajb2	1.02435
Ndufa13	1	Predicted	0.0018								Pik3r5	Dnm1	1.21234
Per3	1	Predicted	0								Pik3r5	Dnm2	1.21234
Sox10	1	Predicted	0								Pik3r5	Dnm3	0.949112
Thrb	1	Predicted	0								Adora2a	Drd2	1
Pard6a	1	Predicted	0								Calm2	Drd2	1
2510012J08Rik	1	Early	0.005								Gipc1	Drd2	0.81213
2610002M06Rik	1	Predicted	0.0006								Gria2	Drd2	0.586693
2810422J05Rik	1	Predicted	0.0024								Tal1	Drg1	0.472212
Abl1	1	Predicted	0.0004								Max	Drg2	1.34772
Acta1	1	Predicted	0								Evpl	Dsp	0.849807
Aldoc	1	Intermediate	0.001								Rab5c	Eea1	0.727636
Ar	1	Predicted	0								Csnk2a2	Eef1b2	0.226328
Arf6	1	Predicted	0								Eif3c	Eef1b2	0.738211
Axin2	1	Predicted	0.0016								Casp3	Egfr	0.0999184
Bace1	1	Predicted	0.0002								Csrp1	Egfr	1
Brca1	1	Predicted	0.0002								Gabarapl2	Egfr	0.668878
Calm2	1	Predicted	0.0004								Hsp90b1	Egfr	0.675182
Cbl	1	Predicted	0								Pex19	Egfr	0.00177
Cbx5	1	Predicted	0								Sec13	Egfr	0.655532
Ccdc85b	1	Predicted	0.0004								Socs4	Egfr	0.111054
Cd28	1	Predicted	0.0028								Hcfc1	Egr2	1
Cdc16	1	Predicted	0								Sox10	Egr2	1
Cdc25c	1	Predicted	0.0012								Sox8	Egr2	1
Cdc27	1	Predicted	0.0002								Srf	Egr2	0.446025
Cdk9	1	Predicted	0								Eif3c	Eif1ax	0.241567
Chchd3	1	Predicted	0.0124								Farsb	Eif3c	1
Clock	1	Predicted	0.0002								Rps12	Eif3c	1
Col4a5	1	Predicted	0.0002								Casc3	Eif4a3	0.0403877
Cops6	1	Predicted	0								Cbl	Eif5b	1
Csnk1e	1	Predicted	0								Eif1ax	Eif5b	0.241567
Csnk2b	1	Predicted	0.0004								Mapk14	Elk3	0.706379
Ctsh	1	Predicted	0.0006								Mapk8	Elk3	1
Cxcr2	1	Early	0								Pnkd	Eno3	0.536938
Cxcr4	1	Early	0.0006								Ptma	Ep300	1.15701
Cyct-Apaf1-Casp9	1	Predicted	0.0062								Sirt1	Ep300	0.153983
Daxx	1	Predicted	0.0016								Xbp1	Ep300	1
Ddx58	1	Predicted	0.0002								Ptk2	Erbb2	0.212337
Degs1	1	Late	0.0084								Ptpn18	Erbb2	0.663289
Evpl	1	Predicted	0.0002								Stfa3	Evpl	1
Fadd	1	Predicted	0.0002								Atg5	Fadd	1
Farsb	1	Early	0.0056								Sh3pxd2b	Fasl	0.641554
Fbl	1	Predicted	0.0004								Cops5	Fbl	1
Fez1	1	Predicted	0.0004								Mapk1	Fcgr3	1
Fmr1	1	Predicted	0								Mapk3	Fcgr3	0.776689
Gas7	1	Late	0.006								Sap30l	Fez1	1
Glrp1	1	Predicted	0.0004								Atox1	Fkbp4	0.885875
Gm6984	1	Predicted	0								App	Flot1	0.70427
Gpld1	1	Predicted	0.0024								Ikbkb	Flt3	1
Hat1	1	Predicted	0.0004								Socs1	Flt3	0.212337
Hcfc1	1	Predicted	0.0012								Nufip1	Fmr1	0.158842
Herc3	1	Predicted	0.0064								Tbk1	Fmr1	0.841158
Herc4	1	Late	0.0032								Col4a1	Fn1	0.559334
Herc6	1	Predicted	0.0032								Col4a5	Fn1	1
Hif1a	1	Predicted	0.0002								Ctsd	Fn1	0.903069
Hist4h4	1	Late	0.0056								Smad4	Fn1	0.165876
Hsp90aa1	1	Predicted	0								Dnm3	Fnbp1	0.949112
Htr2a	1	Predicted	0								Akt3	Foxo1	0.197294
Ift57	1	Predicted	0.003								Akt3	Foxo3	0.0708207
Irf7	1	Predicted	0								Rims1	Fyn	1
Itgb1	1	Predicted	0.0004								Txk	Fyn	0.654424
Ivns1abp	1	Early	0.006								Atg4b	Gabarapl2	0.668878
Kdr	1	Predicted	0.0048								Acta1	Gas7	1
Kif3b	1	Predicted	0.0008								Psap	Gba	0.289647
Kif5c	1	Predicted	0								Tsg101	Gga1	0.147748
Klf16	1	Late	0.0058								Bace1	Gga2	0.0227488
Lst1	1	Predicted	0.005								Mars	Gipc1	0.812126
Map1lc3a	1	Predicted	0								Arhgef6	Git1	5.94897
Mapk8	1	Predicted	0								Arhgef7	Git1	4.09498
Marcks	1	Intermediate	0.0004								Rnf2	Glrp1	1
Mbp	1	Predicted	0.0002								Arf6	Gls	1
Mcrs1	1	Predicted	0								Pard6a	Gls	1
Mdh2	1	Predicted	0.0006								Casp8	Gm10053	2
Met	1	Predicted	0.0004								Gpld1	Gm2a	1
Myh2	1	Predicted	0.0024								Pld2	Gm2a	1
Myl12b	1	Predicted	0.0004								Mis12	Gm6984	1
Ndufa7	1	Predicted	0.0002								Stam	Gm9797	0.641212
Nedd4l	1	Predicted	0								Htr2a	Gna15	0.763888
Nek1	1	Predicted	0.001								Htr2a	Gnai1	0.0237747
Nek6	1	Predicted	0.0012								Pde6d	Gnai1	1
Ngfrap1	1	Predicted	0.0006								Vipr1	Gnai1	0.188562
Nod2	1	Predicted	0.0002								Apoa1	Gpld1	1
Npas2	1	Predicted	0.0016								Prrc2a	Grb2	0.0407187
Nsl1	1	Predicted	0.0012								Reps1	Grb2	0.959281
P4ha1	1	Early	0.0072								Ppp1cb	Gria2	0.586693
Pak3	1	Predicted	0.0002								Map2k2	Grin1	1
Park2	1	Predicted	0								Map2k2	Grin2d	1
Pde6d	1	Early	0.0004								Akt3	Gsk3a	1.43531
Per2	1	Predicted	0.0004								Akt3	Gsk3b	1.58669
Pink1	1	Predicted	0.0002								Pik3r5	Gsk3b	1.21234
Pinx1	1	Predicted	0.0008								Ndufs3	Gzma	0.431815
Plxnc1	1	Early	0.0056								Casp9	Gzmc	0.323343
Ppp1r15b	1	Early	0.005								Cops5	Hand2	0.135943
Ppp2r3c	1	Predicted	0.0084								H3f3b	Hat1	0.54929
Ppp5c	1	Predicted	0.0022								Smad7	Hat1	0.45071
Prkcb	1	Predicted	0.0002								Cdk2	Hcfc1	1
Prkcd	1	Predicted	0								Ppa1	Hdac3	0.695148
Prnp	1	Predicted	0.0008								Mars	Hdac5	0.84228
Rab11a	1	Predicted	0.0014								Ubqln1	Herc3	1
Rbx1	1	Predicted	0								Herc6	Herc4	1
Rims1	1	Predicted	0								Herc3	Herc6	1
Sec13	1	Predicted	0								Tsg101	Hgs	0.105559
Sema7a	1	Predicted	0.0056								Cops5	Hif1a	1
Sin3a	1	Predicted	0								Apaf1	Hip1	0.931323
Smndc1	1	Predicted	0								Casp9	Hip1	0.0686775
Snca	1	Predicted	0.0002								Hdac3	Hist3h2a	0.695146
Sox8	1	Predicted	0.0006								Hdac5	Hist3h2a	0.842284
Strap	1	Predicted	0								Hat1	Hist4h4	1
Stxbp2	1	Predicted	0.0002								Ict1	Hk1	0.292288
Syncrip	1	Predicted	0								Casp3	Hmgb1	0.586693
Tbc1d8	1	Late	0.0042								Mnt	Hmgb1	1
Timm8a1	1	Predicted	0.0008								Cct4	Hnrnph1	0.930937
Tradd	1	Predicted	0								Eif3c	Hnrnph1	0.0299486
Traf4	1	Predicted	0								Sumo1	Hnrnph3	0.176778
Trak1	1	Predicted	0.0012								Pik3r5	Hras1	1.21234
Ube2d3	1	Predicted	0								Reps1	Hsf1	0.133013
Ube2s	1	Predicted	0								Ahsa2	Hsp90aa1	0.852715
Ubqln1	1	Predicted	0								Smyd2	Hsp90aa1	0.147285
Upp1	1	Late	0.0092								Arrb2	Hspa1l	0.0320577
Vim	1	Predicted	0								Dnajb2	Hspa1l	1.02435
Ywhaq	1	Predicted	0.0004								Sgta	Hspa4	0.778857
Zbtb16	1	Predicted	0								Casp9	Hspd1	1
Bad	1	Predicted	0								Chuk	Hspd1	0.586693
Becn1	1	Early	0								Ikbkb	Hspd1	0.954965
CT009575.1	1	Predicted	0								Supt4h1	Htatsf1	0.8788
Nek9	1	Predicted	0.0002								Glul	Htr2a	1
Rabgef1	1	Predicted	0								Mrpl10	Ict1	0.58301
Grb2	1	Early	0								Pnpt1	Ict1	0.58301
Shc1	1	Predicted	0.0002								Dhx58	Ifih1	0.0557041
Tnks2	1	Predicted	0								2810422J05Rik	Ift20	1
Abcd3	0.999999	Predicted	0								Ift57	Ift20	1
Prkca	0.999999	Predicted	0								Kif3b	Ift20	1
Apoa1	0.999996	Predicted	0.0008								Hip1	Ift57	1
Atp5b	0.999992	Intermediate	0								Map3k5	Igf1r	1
Taf15	0.987177	Late	0.0036								Socs1	Igf1r	0.125726
Stk25	0.98715	Early	0.0044								Ywhaz	Igf1r	0.0866108
mt-Nd4	0.98393	Predicted	0.0288								Txndc9	Ikbkap	0.903109
Ndufv1	0.98393	Predicted	0								Akt3	Ikbkb	1.58669
Sp1	0.98393	Predicted	0.0004								Chuk-Ikbkb-Ikbkg	Ikbkb	1
Atp6v0a1	0.98213	Early	0.0062								Bpnt1	Ikbke	0.124462
Ctsd	0.98213	Predicted	0.0002								Akt3	Ikbkg	1.58669
Ksr1	0.970716	Predicted	0								Chuk-Ikbkb-Ikbkg	Ikbkg	1
Eef1b2	0.964539	Late	0.0044								Rps12	Ikbkg	0.406868
Ctnnd1	0.962595	Predicted	0.0002								Socs5	Il2ra	0.338063
S100a4	0.962595	Intermediate	0								Stat5b	Il2rb	0.365315
Zbtb33	0.962595	Predicted	0.0002								Socs7	Il3ra	0.352735
Hnrnph1	0.960886	Late	0								Osm	Il6st	0.374356
Cd3g	0.95785	Predicted	0.0034								Prdx6	Il7r	1
Syk	0.95785	Predicted	0								Prdx6b	Il7r	0.0493343
Sec31a	0.951006	Predicted	0								Ilkap	Ilk	0.705933
Rab8a	0.950737	Predicted	0								Pxn	Ilk	0.28834
Dnm3	0.949112	Predicted	0.0042								Vps26a	Ilk	0.59242
Fnbp1	0.949112	Predicted	0.0016								Cdkn1a	Inpp5k	0.360366
Nrbf2	0.944866	Intermediate	0								Pfdn1	Inpp5k	0.639637
Psen2	0.943845	Late	0								Rb1	Ins1	0.111735
Snrpe	0.939374	Early	0.0004								Ctse	Ins2	0.664596
Insig2	0.934083	Late	0.0006								Psmc5	Insig2	0.620122
Dusp3	0.933034	Early	0.0006								Srebf2	Insig2	0.313961
Apaf1	0.931323	Early	0.004								Syncrip	Insr	0.788994
Ppp2r4	0.930937	Predicted	0								Irf7	Irak1	0.0469983
Ranbp9	0.921161	Predicted	0.0012								Peli1	Irak1	1
Usp11	0.921161	Predicted	0.0008								Sumo1	Irak1	0.777809
Cflar	0.909886	Late	0.0006								Irak1	Irak3	0.824807
Ralb	0.904867	Late	0.0102								Ngfr	Irak3	1
Ikbkap	0.903109	Predicted	0.0004								Tmed7	Irak3	0.633691
Snapin	0.903109	Predicted	0.0004								Chuk	Irf1	1
Txndc9	0.903109	Early	0.0078								Keap1	Irf1	0.518325
Ptpn13	0.900539	Predicted	0.0002								Sumo1	Irf1	0.120068
App	0.888868	Predicted	0								Akt3	Irf3	1.58669
Gpc1	0.888868	Early	0.0144								P4ha1	Irf7	1
Sf3b1	0.888583	Intermediate	0								Ap3s1	Irs1	0.289647
Bcl11b	0.887606	Predicted	0.0014								Rps6kb2	Irs1	1
Mbd3	0.887606	Late	0.0052								Ikbkb	Irs2	0.074991
Ranbp2	0.886612	Intermediate	0								Mtor	Irs2	0.549277
Crebbp	0.886001	Predicted	0								Mapk9	Irs3	0.212337
Tcf3	0.886	Late	0.0046								Mtor	Irs3	1
Atox1	0.885875	Early	0.0092								Ikbkb	Irs4	0.212337
Fkbp4	0.885875	Predicted	0.0018								Mtor	Irs4	1
Ccar1	0.883149	Early	0.0008								Pxn	Itga6	0.840913
Snf8	0.881642	Early	0.003								Sema7a	Itgb1	1
Htatsf1	0.8788	Predicted	0								Cyth2	Itgb2	0.236638
Canx	0.875647	Predicted	0.0006								Kng1	Itgb2	0.663317
Cd3d	0.875647	Predicted	0.0042								Ptk2	Itgb2	1
Ifngr1	0.875647	Early	0.0184								Tln1	Itgb2	0.16869
Erbb2	0.875626	Predicted	0								Cops5	Itgb2l	0.224716
Mid1	0.870747	Early	0.0092								F11r	Itgb2l	0.987621
Ccl6	0.868038	Early	0.0006								Pik3r5	Itk	1.21234
Cab39	0.862232	Intermediate	0								Map3k5	Jak1	0.586693
Stk11	0.862232	Early	0.0028								Socs4	Jak1	0.227009
Vhl	0.862232	Predicted	0								Socs7	Jak1	0.398635
Ccdc53	0.857869	Early	0.0158								Htr2a	Jak2	0.212337
Calr	0.855993	Predicted	0.0002								Nfkbia	Jak2	1
Gabarap	0.852997	Early	0								Socs2	Jak3	0.338063
Ahsa2	0.852715	Early	0.0074								Socs4	Jak3	1
Cask	0.850858	Predicted	0								Akt3	Jun	1.58669
Sdc1	0.850858	Early	0.0048								Dnm2	Kdr	1
Dsp	0.849807	Predicted	0.0002								Cul3	Keap1	0.518325
Nos1	0.849807	Predicted	0								Ppp1r15a	Kif3a	0.753138
Rab5c	0.848344	Early	0								Kif3a	Kif3b	0.753138
Casp6	0.844378	Predicted	0.0002								Map3k10	Kif3b	0.246862
Srp68	0.844378	Early	0.0092								Csnk2b	Kif5c	1
Srp72	0.844378	Predicted	0.002								Socs5	Kit	1
Adss	0.843328	Early	0.0064								Stat5b	Kit	0.212337
Hdac5	0.84228	Predicted	0								Sin3a	Klf16	1
Tbk1	0.841158	Early	0.0004								Prep	Kng1	0.663317
Itga6	0.840913	Predicted	0.0004								Pik3r5	Kras	1.21234
Polr2a	0.83311	Early	0.0004								Map2k2	Ksr1	0.970716
Arntl-Clock	0.832776	Predicted	0.0056								Itga6	Lamc1	0.840913
Csnk1d	0.832776	Early	0.0032								Itgb1	Lamc1	1
Rala	0.830173	Predicted	0								Actb	Lasp1	0.285846
Rassf5	0.830173	Late	0.0052								Cxcr1	Lasp1	0.185418
Ube2w	0.828688	Late	0.0152								Mdfi	Lasp1	0.623623
Gipc1	0.812126	Predicted	0								Cdc25c	Lck	1
Scyl2	0.808972	Early	0.003								Nfkbia	Lck	1
Stat5b	0.789989	Early	0								Txk	Lcp2	0.557913
Pip4k2c	0.789473	Early	0.0074								Prkci	Llgl1	1
Insr	0.788994	Predicted	0								Prkcz	Llgl1	0.0852116
Nmt1	0.786456	Late	0								2510012J08Rik	Lst1	1
Ckap4	0.783482	Late	0.0002								Ap2m1	Ly9	0.734276
Ccl4	0.782697	Early	0.0006								Sh2d1a	Ly9	0.536499
Lilrb4	0.781325	Early	0.0056								Casp9	Lyn	1
Ptpn7	0.77983	Early	0.003								Cdkn1b	Lyn	0.212337
Sgta	0.778858	Intermediate	0								Atg4b	Map1lc3a	1
Hspa4	0.778857	Intermediate	0								Map3k1	Map2k2	1.27723
Tsc2	0.778857	Predicted	0.001								Map3k8	Map2k2	1.27723
Ddit4	0.778856	Intermediate	0.0002								Pak1	Map2k2	0.416259
Abhd16a	0.776171	Predicted	0.0012								Map4k4	Map3k1	0.659732
Safb	0.776171	Predicted	0.0006								Mars	Map3k1	0.427498
Spag7	0.776171	Early	0.0084								Rac2	Map3k1	0.0392153
Anxa6	0.770932	Late	0.0086								Rac3	Map3k1	0.150776
Gna15	0.763888	Late	0.013								Mapk9	Map3k10	0.246862
Sertad2	0.763241	Early	0.0078								Myo1b	Map3k3	0.755878
Myo1b	0.755878	Early	0.001								Pfdn4	Map3k3	0.476942
Kif3a	0.753138	Predicted	0.0012								Ppp1cc	Map3k3	0.0126526
Ppp1r15a	0.753138	Predicted	0.0012								Akt3	Map3k5	1.58669
Tsn	0.753138	Early	0.0102								Peli1	Map3k7	0.385931
P4hb	0.750247	Intermediate	0.0012								Akt3	Map3k8	1.58669
Med1	0.746207	Early	0.0004								Metap2	Mapk1	0.0610751
Ly96	0.745619	Early	0.0028								Vdac1	Mapk1	0.989813
Smyd2	0.739705	Early	0								Ddit3	Mapk14	0.611773
Bicd2	0.737061	Predicted	0.0014								Mapkapk2	Mapk14	0.695566
Ap2m1	0.734276	Predicted	0								Ptpn7	Mapk14	0.77983
Eea1	0.727636	Intermediate	0								Metap2	Mapk3	1
Mlh1	0.726729	Predicted	0								Pxn	Mapk3	0.2489
Csnk1g2	0.71071	Early	0.0016								Pxn	Mapk8	0.787663
Mta1	0.71071	Predicted	0.0004								Slc2a4	Mapk8	0.212337
Ilkap	0.705933	Early	0.01								Prkcd	Marcks	1
Flot1	0.70427	Predicted	0.0012								Cask	Mars	0.850854
Cdk4	0.697705	Intermediate	0								Cdk9	Mars	0.069059
Hdac3	0.695148	Predicted	0								Ikbkg	Mars	1.04869
Ppa1	0.695148	Intermediate	0								Map1lc3a	Mars	0.069059
Wipi1	0.695146	Early	0								Nfkb2	Mars	0.04423
Dyrk2	0.686669	Early	0.0014								Dhx58	Mavs	0.554236
Sec61g	0.683087	Early	0.0018								Ppp1cb	Max	1
Sec62	0.683087	Predicted	0								Ppp1cc	Max	0.347712
Actr3	0.682036	Early	0								Bcl11b	Mbd3	0.887606
Hsp90b1	0.675182	Early	0.006								Ly96	Mbl2	0.156703
Gabarapl2	0.668878	Predicted	0.0012								Ctdsp1	Mbp	1
Ctse	0.664596	Early	0.0084								Ccdc53	Mcrs1	0.857869
Ins2	0.664596	Predicted	0								Phc2	Mcrs1	0.142131
Mrps9	0.663978	Early	0.0134								Phlda1	Mdfi	0.623623
Kng1	0.663317	Predicted	0								Ndufs1	Mdh2	1
Prep	0.663317	Early	0.0014								Ccar1	Mdm2	0.420087
Ptpn18	0.663289	Early	0.0058								Dyrk2	Mdm2	0.686669
Map4k4	0.659732	Early	0.0108								Rpl26	Mdm2	0.439804
Optn	0.658101	Predicted	0								S100a4	Mdm2	0.962592
Chmp1a	0.644576	Predicted	0.0006								Casp3	Met	1
Stambp	0.644576	Predicted	0.0008								Gabarap	Mlh1	0.726729
Fasl	0.641554	Predicted	0.0002								Csnk1g2	Mta1	0.71071
Sh3pxd2b	0.641554	Early	0.0108								Ndufa7	mt-Nd4	0.98393
Pttg1	0.641361	Intermediate	0								Akt3	Mtor	1.58669
Pttg1ip	0.641361	Early	0.0104								Pik3r5	Mtor	1.21234
Gm9797	0.641212	Predicted	0.0108								Mnt	Myc	0.0514061
Hgs	0.641212	Early	0								Stat2	Myc	1.33806
Casp7	0.640906	Predicted	0								Actg1	Myh2	1
Pfdn1	0.639635	Predicted	0								Pnkd	Myl12b	1
Sec61b	0.637376	Predicted	0.0002								Eif3c	Ncl	0.219341
Spc25	0.637376	Predicted	0								Gzma	Ncl	0.431815
Tmed7	0.633691	Predicted	0								Mdm2	Ncl	0.836385
Chmp4b	0.628335	Predicted	0.0012								Ccnd3	Ncoa2	0.130786
Trim24	0.625501	Predicted	0.0004								Inpp5k	Ncor2	1
Irs2	0.624268	Predicted	0.0002								Ndufa7	Ndufa13	0.0160703
Mdfi	0.623623	Predicted	0.001								Ndufv1	Ndufa13	0.98393
Phlda1	0.623623	Early	0.0192								Ndufs7	Ndufa7	1
Itga2b	0.622061	Early	0.0098								Ndufs2	Ndufs3	0.431815
Psmc5	0.620122	Intermediate	0								Ndufs2	Ndufv1	0.763553
Ddit3	0.611773	Early	0.0268								Ndufs7	Ndufv1	0.220377
Cd300lf	0.599856	Early	0.0088								Psmd4	Nedd4l	0.536938
Aph1c	0.592997	Predicted	0.0006								Sfn	Nedd4l	0.463062
Vps26a	0.59242	Intermediate	0								Fez1	Nek1	1
Tlr4	0.588916	Predicted	0								Rps6kb1	Nek6	1
Gria2	0.586693	Predicted	0.0048								Nek6	Nek7	1
Prkce	0.586693	Predicted	0.0008								Nek9	Nek7	1
Ubtf	0.586484	Early	0.0068								Bicd2	Nek9	0.737061
Mrpl10	0.58301	Early	0.001								Mbp	Nek9	0.204634
Pnpt1	0.58301	Early	0.0008								Supt16h	Nek9	0.0583048
Vamp7	0.57701	Predicted	0								Ppp3r1	Nfat5	1.19987
Prrc2a	0.574615	Predicted	0								Akt2	Nfkb1	1
Col4a1	0.559334	Predicted	0								Akt3	Nfkb1	1.58669
Stx7	0.55816	Early	0.0044								Nfkbie	Nfkb1	0.643057
Lcp2	0.557913	Intermediate	0.0004								Psmd11	Nfkb2	0.0442388
Xpo1	0.555485	Early	0.0002								Akt3	Nfkbia	1.58669
Mavs	0.554236	Predicted	0								Casp8	Nfkbia	3.22975
H3f3b	0.54929	Early	0.0098								Akt3	Nfkbib	1.58669
Tdg	0.54644	Early	0.0004								Akt3	Nfkbie	1.58669
Eftud2	0.53786	Early	0.0066								Nfkbib	Ngfr	1
Eno3	0.536938	Predicted	0.0042								Ptpn13	Ngfr	0.900539
Psmd4	0.536938	Predicted	0.0028								Vta1	Ngfrap1	1
Trim63	0.536938	Predicted	0.0046								Hsp90aa1	Nlrp3	1
Fcgr2b	0.536499	Early	0.0018								Nod2	Nlrp3	0.301214
Sh2d1a	0.536499	Predicted	0.0002								Marcks	Nmt1	0.43531
Mapk9	0.536179	Early	0								Nos3	Nmt1	0.351146
Ctsb	0.535866	Predicted	0.0002								Cops8	Nod1	0.322494
Rgs2	0.535866	Intermediate	0								Ndufa13	Nod2	1
Cryaa	0.532683	Predicted	0.0032								Sumo1	Nos1	0.849807
Actn1	0.531813	Predicted	0.0002								Akt3	Nos3	1.58669
Notch1	0.525624	Predicted	0.0002								Akt1	Notch1	0.525624
Keap1	0.518325	Predicted	0.0006								Ep300	Npas2	1
Ube2b	0.518003	Intermediate	0								Fkbp4	Nr3c2	0.885875
Psma3	0.487762	Predicted	0								Trim24	Nr3c2	0.625501
Pfdn4	0.476942	Predicted	0								Pik3r5	Nras	1.21234
Drg1	0.472212	Late	0.0084								Ikbkg	Nrbf2	0.944866
Tal1	0.472212	Predicted	0.003								Mis12	Nsl1	1
Siglecg	0.464689	Predicted	0.0024								Ccnt1	Nufip1	0.158842
Sfn	0.463062	Predicted	0.0008								Fmr1	Nufip2	1
Cnot1	0.45455	Predicted	0.0006								Sumo3	Nufip2	0.953002
Pparg	0.45455	Predicted	0								Rab8a	Optn	0.658101
Smad7	0.45071	Predicted	0.0002								P4ha2	P4hb	0.750247
Srf	0.446025	Predicted	0.0016								Akt2	Pak1	0.140038
Rpl26	0.439804	Early	0.002								Pxn	Pak1	1
Gzma	0.431815	Predicted	0.002								Cpsf6	Pak2	1.02377
Ndufs3	0.431815	Predicted	0.0034								Pxn	Pak3	1
Ascc2	0.424239	Intermediate	0.0002								Rac3	Pak6	0.0615607
Snw1	0.424239	Predicted	0								Cdc42	Pard6a	0.0431021
Rnf216	0.423429	Predicted	0								Prkci	Pard6a	0.212337
Csf2rb	0.414129	Predicted	0.0052								Prkcz	Pard6a	0.744561
Actr2	0.396189	Intermediate	0								Tuba4a	Park2	1
Map3k7	0.385931	Predicted	0.0002								Cops6	Pbx2	0.347761
Relb	0.374499	Predicted	0								Rab8a	Pde6d	0.292635
Il6st	0.374356	Predicted	0								Slc9a3r1	Pdgfra	1
Il2rb	0.365315	Predicted	0								Stat5b	Pdgfra	0.212337
Usp7	0.355424	Predicted	0.0008								Akt2	Pdk1	0.374356
Il3ra	0.352735	Predicted	0.0058								Pik3r5	Pdk1	1.21234
Pbx2	0.347761	Predicted	0								Pik3r5	Pdpk1	1.21234
Arl2	0.338355	Predicted	0.0008								Rbx1	Per2	1
Il2ra	0.338063	Predicted	0.0046								Cul1	Per3	0.0160703
Gzmc	0.323343	Predicted	0								Sp1	Per3	0.98393
Nod1	0.322494	Predicted	0								F11r	Pex19	0.00177
Srebf2	0.313961	Predicted	0.002								Pfdn2	Pfdn1	0.639635
Hk1	0.292288	Late	0.001								Pfdn2	Pfdn4	0.476942
Ap3s1	0.289647	Predicted	0.009								Rnf2	Phc2	0.142131
Gba	0.289647	Predicted	0.0048								Akt1	Pias1	0.910315
Scarb2	0.289647	Predicted	0.0036								Dnm1	Pias1	0.0124689
Actb	0.285846	Predicted	0.0026								Sumo3	Pias1	0.41528
Arpc5	0.285846	Intermediate	0.0004								Akt1	Pias2	0.709728
Wasf3	0.285846	Predicted	0.0004								Chmp4b	Pias2	0.628335
Trim27	0.278893	Predicted	0.0002								Glul	Pias3	0.081519
Tsg101	0.253307	Predicted	0								Ncoa2	Pias3	0.130786
Map3k10	0.246862	Predicted	0.0026								Ppp1ca	Pias3	0.144819
Eif1ax	0.241567	Predicted	0.0018								Smad2	Pias3	0.131132
Cyth2	0.236638	Predicted	0								Sumo1	Pias3	0.849807
Tnf	0.234677	Predicted	0.0004								Nras	Pik3ca	0.212337
Vcam1	0.234677	Predicted	0.0046								Rps6kb1	Pik3ca	0.586693
Zap70	0.226843	Predicted	0								Sqstm1	Pik3ca	0.741485
Prmt1	0.211006	Predicted	0.0002								Ticam1	Pik3ca	0.0461783
AC122379.1	0.207277	Predicted	0								Prkce	Pik3cb	0.586693
Foxo1	0.197294	Predicted	0.0002								Ywhaq	Pik3cb	1
Ramp3	0.188562	Early	0.0102								Hras1	Pik3cd	1
Vipr1	0.188562	Predicted	0.0026								Irs1	Pik3cd	0.0773098
Cxcr1	0.185418	Predicted	0								Ptpn11	Pik3cd	0.412254
Xrcc5	0.177594	Predicted	0								Traf2	Pik3cd	0.0971295
Hnrnph3	0.176778	Late	0.0012								Il6st	Pik3cg	0.374356
Axin1	0.173386	Predicted	0.0022								Pik3r5	Pik3cg	1.21234
Tln1	0.16869	Predicted	0.0002								Pdpk1	Pik3r1	0.586693
Smad4	0.165876	Predicted	0								Pxn	Pik3r1	1
Ctnnb1	0.163615	Predicted	0								Socs1	Pik3r2	1
Ccnt1	0.158842	Predicted	0.0004								Socs7	Pik3r2	0.586693
Nufip1	0.158842	Predicted	0.0006								Insr	Pik3r3	0.788994
Mbl2	0.156703	Predicted	0.0004								Ptpn11	Pik3r3	0.797699
Ppl	0.150193	Predicted	0.002								Cd28	Pik3r5	1
Gga1	0.147748	Predicted	0.0006								Crkl	Pik3r5	0.0769809
Phc2	0.142131	Predicted	0.0012								Csf2rb	Pik3r5	0.414129
Hand2	0.135943	Predicted	0.001								Egfr	Pik3r5	1.21234
Hsf1	0.133013	Predicted	0.0002								Erbb2	Pik3r5	0.875626
Smad2	0.131132	Predicted	0								Flt3	Pik3r5	1.21234
Ncoa2	0.130786	Predicted	0.003								Fyn	Pik3r5	1.21234
Bpnt1	0.124462	Intermediate	0								Gnai1	Pik3r5	1.21234
Ikbke	0.124462	Late	0								Igf1r	Pik3r5	1.21234
Ins1	0.111735	Predicted	0.0006								Il2ra	Pik3r5	0.338063
Rb1	0.111735	Predicted	0.0034								Il2rb	Pik3r5	0.365315
Ddx21	0.111417	Intermediate	0								Il3ra	Pik3r5	0.352735
Dot1l	0.111417	Early	0								Ins1	Pik3r5	0.111735
Rab33b	0.101867	Predicted	0.001								Ins2	Pik3r5	0.664596
Ripk1	0.0992917	Predicted	0.0002								Irs1	Pik3r5	1.21234
Was	0.09498	Predicted	0								Irs2	Pik3r5	0.624268
Ywhaz	0.0866108	Predicted	0.0002								Irs3	Pik3r5	1.21234
Crkl	0.0769809	Predicted	0.001								Irs4	Pik3r5	1.21234
Foxo3	0.0708207	Predicted	0.002								Itgb2l	Pik3r5	1.21234
Snrpd2	0.0615846	Predicted	0								Jak1	Pik3r5	1.21234
Pak6	0.0615607	Predicted	0.012								Jak2	Pik3r5	1.21234
Parp1	0.0583048	Early	0.007								Kdr	Pik3r5	1
Supt16h	0.0583048	Predicted	0.0012								Kit	Pik3r5	1.21234
Ifih1	0.0557041	Predicted	0								Lck	Pik3r5	1.21234
Bak1	0.0530974	Predicted	0.0002								Lyn	Pik3r5	1.21234
Prdx6b	0.0493343	Predicted	0.0026								Met	Pik3r5	1
Ube2i	0.0469983	Predicted	0.0004								Ngfr	Pik3r5	0.900539
Ticam1	0.0461783	Predicted	0								Pdgfra	Pik3r5	1.21234
C1qbp	0.0461339	Intermediate	0								Src	Pik3r5	1.21234
Nfkb2	0.0442388	Predicted	0								Traf1	Pik3r5	1.21234
Casc3	0.04039	Intermediate	0.0008								Traf2	Pik3r5	1.21234
Eif4a3	0.0403877	Intermediate	0								Traf3	Pik3r5	1.21234
Ccna2	0.035804	Predicted	0.0006								Vcam1	Pik3r5	0.234677
Ccnb1	0.02562	Predicted	0								Zap70	Pik3r5	0.226843
Anapc16	0.0256188	Intermediate	0								Stat2	Pim1	1.33806
Rnf25	0.0236695	Late	0.0062								Becn1	Pink1	1
Ube2d2	0.0236695	Predicted	0.0002								Mcrs1	Pinx1	1
Gga2	0.0227488	Predicted	0.001								Btk	Pip5k1c	0.789473
Stx3	0.0188504	Predicted	0.0008								Rac2	Pip5k1c	0.962595
Cul1	0.01607	Predicted	0								Dnm1	Plcg1	0.199868
Pex19	0.00177	Intermediate	0.0002								Nfat5	Plcg1	1
											Itk	Plcg2	0.212337
											Pik3r5	Plcg2	0.987534
											Actn1	Pld2	0.531813
											Aldoc	Pld2	1
											Ctdsp1	Polr2a	0.248571
											Wipi1	Ppa1	0.695148
											Med1	Pparg	0.45455
											Evpl	Ppl	0.150193
											Akt3	Ppp1ca	1.58669
											Ppp1r15b	Ppp1ca	1
											Akt3	Ppp1cb	1.58669
											Akt3	Ppp1cc	1.58669
											Tsn	Ppp1r15a	0.753138
											Cdk2	Ppp2ca	0.497955
											Mrps9	Ppp2ca	0.663978
											Pim1	Ppp2ca	0.407126
											Sgk1	Ppp2ca	1.08768
											Mid1	Ppp2cb	0.870747
											Prkcb	Ppp2cb	1
											Arrb2	Ppp2r1a	0.8788
											Cxcr2	Ppp2r1a	1
											Ksr1	Ppp2r1a	0.0459562
											Rab11a	Ppp2r1a	1
											Cdk4	Ppp2r1b	0.697705
											Map3k3	Ppp2r1b	0.647296
											Rela	Ppp2r1b	0.241692
											Grin1	Ppp2r2a	1
											Grin2d	Ppp2r2a	1
											Ksr1	Ppp2r2a	0.924756
											Cct4	Ppp2r2b	0.930937
											Mapk14	Ppp2r2b	0.38079
											Rac1	Ppp2r2b	1
											Trp53	Ppp2r2b	0.613029
											Cct4	Ppp2r2c	0.930937
											Rela	Ppp2r2c	0.655756
											Cct4	Ppp2r2d	0.930937
											Mapk14	Ppp2r2d	1
											Rela	Ppp2r2d	0.461957
											Hmgb1	Ppp2r3a	0.586693
											Ppp5c	Ppp2r3a	1
											Drd2	Ppp2r3c	1
											Pim1	Ppp2r4	0.930937
											Drd2	Ppp2r5a	2.39882
											Nos3	Ppp2r5a	1.23554
											Ppp2ca	Ppp2r5a	1.5314
											Axin1	Ppp2r5b	0.173386
											Axin2	Ppp2r5b	0.413307
											Sgol1	Ppp2r5b	1
											Ep300	Ppp2r5c	0.586693
											Pxn	Ppp2r5c	1
											Arl2	Ppp2r5d	0.338355
											Hand2	Ppp2r5d	0.135943
											Nek1	Ppp2r5d	1
											Sgol1	Ppp2r5d	0.112394
											Axin2	Ppp2r5e	0.586693
											Sgol1	Ppp2r5e	1
											Calr	Ppp3r1	0.855993
											Plcg1	Ppp3r1	1.19987
											Plcg2	Ppp3r1	1.19987
											Cdc16	Ppp5c	1
											Prdx6	Prdx6b	0.0493343
											Gsk3a	Prkca	0.435309
											Marcks	Prkca	0.56469
											Lst1	Prkcb	1
											Gsk3a	Prkcd	1
											Rps6kb2	Prkce	0.586693
											Pik3r5	Prkci	1.21234
											Pik3r5	Prkcz	1.21234
											Syncrip	Prmt1	0.211006
											Dnm1	Prnp	1
											P4ha2	Prrc2a	0.574615
											Aph1c	Psen2	0.592997
											Casp3	Psen2	0.350848
											Prrc2a	Psma3	0.487762
											Fbl	Psmb6	1
											Psma3	Psmb6	0.262386
											Psmd11	Psmc5	0.620122
											Trim63	Psmd4	0.536938
											Akt1	Pten	0.586693
											Cdc27	Pten	1
											Arrb2	Ptges3	0.8788
											Casp3	Ptges3	1
											Casp7	Ptges3	0.640906
											Pik3r5	Ptk2	1.21234
											Cul3	Ptma	1.27977
											Lilrb4	Ptpn11	0.209953
											Pxn	Ptpn11	1
											Stk25	Ptpn13	0.900539
											Cd300lf	Ptpn6	0.599856
											Lilrb4	Ptpn6	0.571372
											Nfat5	Ptpn6	0.199868
											Csnk2a1	Ptprc	1
											Csnk2a2	Ptprc	1
											Lcp2	Ptprc	0.557913
											Mbl2	Ptprc	0.156703
											Pttg1ip	Pttg1	0.641361
											Git1	Pxn	10.044
											2610002M06Rik	Rab11a	1
											Atg5	Rab33b	0.101867
											Rab10	Rab8a	0.950737
											Eea1	Rabgef1	0.727636
											Gga1	Rabgef1	0.147748
											Gga2	Rabgef1	0.0227488
											Rab33b	Rabgef1	0.101867
											Metap2	Rac1	0.787663
											Pik3r5	Rac1	1.21234
											Pik3r5	Rac2	1.21234
											Pik3r5	Rac3	1.21234
											Reps1	Rala	0.830173
											Ccnd1	Ralb	0.904867
											Myc	Ranbp2	0.389469
											Xpo1	Ranbp2	0.497143
											Bace1	Ranbp9	0.921161
											Ccnd3	Rara	1
											Nrbf2	Rara	0.270203
											Rala	Rassf5	0.830173
											Ccnd2	Rb1	0.111735
											Cul3	Rbx1	1
											Akt2	Rela	0.472133
											Akt3	Rela	1.58669
											Nfkbib	Rela	0.586693
											Nfkbie	Rela	0.943636
											Rac3	Rela	1
											Gm6984	Relb	0.374499
											Ctsb	Rgs2	0.535866
											Abcd3	Rhot1	1
											CT009575.1	Rhot1	1
											Irak1	Rhot1	1
											Kif5c	Rhot1	1
											Park2	Rhot1	1
											Pink1	Rhot1	1
											Trak1	Rhot1	1
											Rab10	Rims1	1
											Tnfaip3	Ripk1	0.0992917
											Map3k3	Rnf126	0.00708823
											Ube2d3	Rnf126	1
											Ripk1	Rnf216	0.0992917
											Tlr4	Rnf216	0.324137
											Ube2d2	Rnf25	0.0236695
											Akt3	Rps6kb1	1.58669
											Akt3	Rps6kb2	1.58669
											Bcl2	Rtn4	1
											Bcl2l1	Rtn4	1
											Mbp	Rtn4	0.795366
											Drg2	Rwdd1	1.34772
											Zbtb33	S100a4	0.962595
											Abhd16a	Safb	0.776171
											Sec13	Sar1b	0.344468
											Sec31a	Sar1b	0.951006
											Gba	Scarb2	0.289647
											Sar1a	Sec13	1
											Sar1a	Sec31a	0.951006
											Spc25	Sec61b	0.637376
											Sec61g	Sec62	0.683087
											Irf1	Sec63	0.263476
											Sec61b	Sec63	0.637376
											Sec62	Sec63	0.683087
											Plxnc1	Sema7a	1
											Gsk3b	Sf3b1	0.888583
											Ccar1	Sfn	0.463062
											Nr3c2	Sgk1	1.51138
											Cbx5	Sgol1	0.112394
											Lrrc59	Sgol1	1
											Nsl1	Sgol1	1
											F11r	Sgta	0.778858
											Fcgr2b	Sh2d1a	0.536499
											Foxo3	Shc1	0.0708207
											Mapkapk2	Shc1	0.929179
											Ptpn6	Siglecg	0.464689
											Sap30l	Sin3a	0.277352
											Smarcb1	Sin3a	0.722648
											Pik3r5	Slc2a4	1.21234
											Ccdc85b	Slu7	1
											Srrm2	Slu7	1
											Psmd11	Smad2	0.131132
											Psmd11	Smad4	0.165876
											Peli1	Smad7	0.45071
											Ddx21	Smndc1	0.111417
											Sf3b1	Smndc1	0.888583
											Ikbkap	Snapin	0.903109
											Vdac1	Snca	1
											Snrpe	Snrpd2	0.0615846
											Snrpd2	Snrpd3	0.0615846
											Strap	Snrpd3	1
											Stxbp2	Snrpd3	1
											Sirt1	Snw1	0.424239
											Stat2	Socs1	1.33806
											Stat2	Socs2	1.09025
											Stat2	Socs4	1.33806
											Stat2	Socs5	1.33806
											Stat2	Socs7	1.33806
											Sumo1	Sox10	0.0469983
											Sumo3	Sox10	0.953002
											Jun	Sox8	1
											mt-Nd4	Sp1	0.98393
											Map3k3	Spag9	0.591089
											Myc	Spag9	1
											Mis12	Spc25	0.637376
											Ar	Spop	1
											Daxx	Spop	1
											Traf6	Spop	0.0496973
											Zbtb16	Spop	1
											Casp8	Sqstm1	1.48297
											Dnm2	Src	0.212337
											Pdpk1	Src	0.503434
											Smarcb1	Src	0.496566
											Casp3	Srebf2	0.313961
											Casp9	Srf	0.446025
											Srp68	Srp72	0.844378
											Arrb2	Srrm2	0.8788
											Eif4a3	Srrm2	0.0403877
											Sumo1	Srrm2	0.849807
											Cxcr4	Stam	1
											Hgs	Stam	0.641212
											Chmp1a	Stambp	0.644576
											Cish	Stat2	1.33806
											Jak3	Stat2	1.33806
											Pias1	Stat2	1.33806
											Pias2	Stat2	1.33806
											Pias3	Stat2	1.33806
											Pias4	Stat2	1.33806
											Ppp2cb	Stat2	0.284054
											Ppp2r1a	Stat2	1.33806
											Ppp2r2a	Stat2	1.33806
											Ppp2r2b	Stat2	1.33806
											Ppp2r2d	Stat2	0.806201
											Abl1	Stat5a	1
											Btk	Stat5a	1
											Ep300	Stat5a	0.0311206
											Il7r	Stat5a	1
											Sqstm1	Stat5a	0.741485
											Ep300	Stat6	0.693182
											Prkcz	Stat6	0.382564
											Pdpk1	Strap	0.12221
											Snrpe	Strap	0.87779
											Vamp2	Stx3	0.0188504
											Vamp2	Stxbp2	1
											Casp8	Sumo1	2.03978
											Dsp	Sumo1	0.849807
											Ifih1	Sumo1	0.0557041
											Mybbp1a	Sumo1	0.849807
											Nfkbia	Sumo1	0.725785
											Hsf1	Sumo3	0.133013
											Irf3	Sumo3	0.953002
											Irf7	Sumo3	0.953002
											Jun	Sumo3	0.586693
											Pias4	Sumo3	0.102135
											Tdg	Sumo3	0.54644
											Parp1	Supt16h	0.0583048
											Dusp3	Syk	0.706191
											Slc9a3r1	Syk	0.251659
											Ivns1abp	Syncrip	1
											Prmt1	Taf15	0.211006
											Safb	Taf15	0.776171
											Mapk3	Tal1	0.472212
											Traf4	Tbc1d8	1
											Tnfaip3	Tbk1	0.841158
											Crebbp	Tcf3	0.886
											Foxo1	Thrb	0.0336793
											Med1	Thrb	0.291657
											Nrbf2	Thrb	0.674664
											Tnfaip3	Ticam1	0.0461783
											Gm9797	Timm13	0.641212
											Timm8a1	Timm13	1
											Stam	Timm8a1	1
											Pxn	Tln1	0.16869
											Ly96	Tlr4	0.588916
											Irf3	Tmed7	0.633691
											Xbp1	Tnf	0.234677
											Fnbp1	Tnks2	0.949112
											Mapk1	Tnks2	0.0508877
											Mavs	Tradd	0.554236
											Optn	Tradd	0.445764
											Fadd	Tradd-Fadd	1
											Tradd	Tradd-Fadd	1
											Casp3	Traf1	0.212337
											Tnfaip3	Traf1	1
											Map3k8	Traf2	0.309467
											Tnfaip3	Traf2	1
											Ddx58	Traf3	1
											Optn	Traf3	0.212337
											Ngfrap1	Traf4	1
											Psmd11	Traf6	1
											Tnfaip3	Traf6	0.174163
											AC122379.1	Trak1	0.16689
											Polr2a	Trak1	0.83311
											Glrp1	Trim11	1
											Trim27	Trim11	0.278893
											Gm6984	Trim24	0.625501
											Ikbkb	Trim27	0.278893
											Eno3	Trim63	0.536938
											Cops8	Trp53	1.09889
											Pttg1	Trp53	0.615742
											Ddit4	Tsc2	0.778857
											Snf8	Tsg101	0.253307
											Pik3r5	Txk	1.21234
											Cdkn1b	Ube2b	0.148028
											Unc119	Ube2b	0.369975
											Rnf2	Ube2d2	0.0236695
											Tnfaip3	Ube2d3	1
											Peli1	Ube2i	0.0469983
											Brca1	Ube2n	0.171312
											Chuk	Ube2n	1
											Map3k7	Ube2n	0.385931
											Tlr4	Ube2n	0.0169212
											Stambp	Ube2s	0.644576
											Usp7	Ube2s	0.355424
											Brca1	Ube2w	0.828688
											Mtor	Ubqln1	0.249753
											P4hb	Ubqln1	0.750247
											Vim	Upp1	1
											Ranbp9	Usp11	0.921161
											Traf6	Usp15	1
											Ube2s	Usp15	1
											Usp11	Usp15	0.921161
											Rnf2	Usp7	0.355424
											Stx3	Vamp7	0.0188504
											Stx7	Vamp7	0.55816
											Tnf	Vcam1	0.234677
											Cab39	Vhl	0.862232
											Casp9	Vim	0.849807
											Ppl	Vim	0.150193
											Ramp3	Vipr1	0.188562
											Smyd2	Vps26a	0.59242
											Actr2	Was	0.09498
											Actr3	Wasf3	0.285846
											Supt4h1	Xrcc5	0.177594
											Bad	Ywhaq	1
											Stk25	Ywhaz	0.0866108
											Dusp3	Zap70	0.226843
											Psmd11	Zbtb16	1
											Ctnnd1	Zbtb33	0.962595
