# Supplementary material for: Linking Transcriptional Changes over Time in Stimulated Dendritic Cells to Identify Gene Networks Activated during the Innate Immune Response
Source: PLoS Comput Biol. 2013 Nov 7;9(11):e1003323. doi: 10.1371/journal.pcbi.1003323 (PMC3820512; doi:10.1371/journal.pcbi.1003323)
Supplement: Table S11 — Genes and edges identified in the optimal sub-network for activated TRIF-knockout dendritic cells by the proposed method. (XLSX) [file pcbi.1003323.s019.xlsx]

## Sheet: Optimal network - TRIF KO
Supporting Table S11 A. Identified genes for TRIF (Ticam1) knockout DCs											Supporting Table S11 B. Optimal edges
Gene	Flow	Type	Significance		Type	Time of greatest fold change in expression:					Gene 1	Gene 2	Flow
Nfkb1	74.2843	Intermediate	0		Early	0.5-1 hrs					Icam1	4930544G11Rik	2.17531
Jak2	49.7671	Intermediate	0		Intermediate	2-4 hrs					Il1b	A2m	1
Socs1	44.1712	Intermediate	0		Late	6-8hrs					Tnf	A2m	0.589056
Pik3r5	31.8633	Intermediate	0		Predicted	No detectable change in expression					Mapt	Aatf	0.765667
Met	28.2259	Intermediate	0								Pdzk1	Abca1	0.113698
Myd88	18.441	Predicted	0								Nfe2l2	Abcc2	1.24847
Hsp90aa1	15.1217	Intermediate	0								Dnm3	Abl1	1
Traf1	14.0662	Intermediate	0								Epha4	Abl1	1.50037
Cxcr4	14.0644	Intermediate	0								Syk	AC160982.1	0.68202
Ccl3	13.8862	Intermediate	0								Mmp2	Acan	0.951908
Rela	13.7087	Intermediate	0								Mmp8	Acan	0.0480917
Ppp1cb	13.3346	Intermediate	0								Erbb2	Acpp	1
Ccr2	12.3694	Intermediate	0								Shbg	Acpp	0.53874
Stat5a	11.5697	Intermediate	0								Alox5	Actb	0.233771
Nfkbib	11.3794	Intermediate	0								Nos2	Actb	0.661486
Src	10.4495	Intermediate	0								Ezr	Actg1	1.03144
Icam1	10.3046	Intermediate	0								Nos2	Actn4	1
Ezr	10.2951	Intermediate	0								Acvr1b-Acvr2b	Acvr1b	0.624911
Il1b	10.1537	Intermediate	0								Acvr2a-Acvr1b	Acvr1b	0.624911
Il10	9.83289	Intermediate	0								Inhba	Acvr1b-Acvr2b	0.624911
Sp1	9.83154	Predicted	0								Inhba	Acvr2a-Acvr1b	0.624911
Ptgs2	9.26046	Intermediate	0								Adcy5	Adcy2	1
Fas	8.82271	Intermediate	0								Ptgs2	Adcy5	8.20982
Cxcl1	8.39584	Intermediate	0								Ezr	Adora2b	1.66679
Tec	8.32306	Intermediate	0								Il1b	Adrb2	1
Gadd45b	8.2274	Intermediate	0.001								Pik3cg	Adrbk1	0.97771
Adcy5	8.20982	Predicted	0								Pik3ca	Akt1	1
Tnf	8.05695	Early	0								Pik3cb	Akt1	1
Cav1	7.89068	Intermediate	0								Pik3cd	Akt1	0.764531
Thbs1	7.85994	Intermediate	0								Pik3r5	Akt1	1.29971
Cxcl2	7.81985	Intermediate	0								Plekho1	Akt1	0.36109
Ralgds	7.79597	Intermediate	0								Ppp2r2d	Akt1	1
Il1a	7.63518	Early	0								Pik3ca	Akt2	1
Tlr2	7.47922	Intermediate	0								Pik3cb	Akt2	1
Il6	7.43423	Intermediate	0.0002								Pik3cd	Akt2	0.764531
Irf5	7.21168	Predicted	0								Pik3r5	Akt2	1.29971
Rap1b	7.06203	Intermediate	0.0002								Ppp2r2b	Akt2	1
Hck	7.04397	Intermediate	0								Ppp2r2d	Akt2	1
Ets2	6.99892	Intermediate	0								Pik3ca	Akt3	0.827859
Itgb5	6.94934	Intermediate	0								Pik3cd	Akt3	0.316392
Socs3	6.84136	Early	0								Pik3cg	Akt3	1
Jun	6.81541	Early	0								Pik3r3	Akt3	1
Il23a	6.36977	Early	0								Pik3r5	Akt3	1.29971
Nos2	6.33238	Late	0								Ppp2r2c	Akt3	1
Arrb1	6.27921	Intermediate	0								Srgn	Alb	0.492138
Mapk3	6.20291	Predicted	0								Mapkapk2	Alox5	1.23164
Mapkapk2	6.16245	Intermediate	0								Il1b	Alpi	0.105557
Irak2	6.15032	Intermediate	0								Abca1	Apoa1	0.113698
Akt2	6.06424	Predicted	0.0066								Gpld1	Apoa1	0.105557
Stat3	5.86206	Predicted	0								Htra2	App	0.392274
Ifngr1	5.60875	Intermediate	0								Nlrp10	Ar	1
Egr1	5.60488	Early	0								Rap1b	Araf	1.26916
Mapk8	5.45266	Predicted	0								Pak2	Arhgap10	0.225273
Akt3	5.44396	Predicted	0.0068								Insr	Arhgap26	1
Akt1	5.42533	Predicted	0								Myc	Arl1	0.926137
Pik3ca	5.25508	Predicted	0								Adrb2	Arrb1	0.897358
Pik3cb	5.25508	Predicted	0								Ccr2	Arrb1	1.02248
Mapk1	5.22473	Predicted	0								Ccr5	Arrb1	0.15908
Dusp16	5.17737	Intermediate	0								Cxcr4	Arrb1	1.10459
Cd40	5.15178	Intermediate	0								Hax1	Arrb1	0.538004
Ccl4	5.1499	Intermediate	0.0004								Hck	Arrb1	0.991509
Nfkb2	5.01422	Predicted	0								Nfkbia	Arrb1	0.311535
Relb	5.01302	Intermediate	0								Prmt5	Arrb1	0.515116
Pik3cg	4.90924	Predicted	0								Sdc3	Arrb1	0.739541
Traf6	4.9037	Early	0								Ccr2	Arrb2	1.14761
Inpp5d	4.89525	Intermediate	0								Jak2	Ass1	1.0664
Hspa1l	4.89167	Intermediate	0								Ppp1cb	Atf2	1.20911
Trp53	4.88243	Predicted	0								Il6	Atf3	3.92019
Rps6ka2	4.8358	Intermediate	0.0024								Mapkapk2	Atf4	2.05415
Cebpb	4.83209	Predicted	0								Rps6ka2	Atf4	1.20895
Hif1a	4.76846	Intermediate	0								Slc9a3r1	Atp6v1e1	0.988007
Epha4	4.50112	Intermediate	0.002								Zbtb16	Atp7b	0.138708
Mapk10	4.46389	Predicted	0.0016								Shc3	Axl	0.740665
Mapk9	4.46389	Predicted	0.001								Casp9	Bcl10	0.970005
Traf2	4.4321	Intermediate	0								Traf2	Bcl10	0.379293
Ptpn6	4.42877	Intermediate	0								Nfkb1	Bcl2	2.22527
Sdc1	4.35097	Intermediate	0								Relb	Bcl3	1.03967
Nfkbia	4.2844	Early	0								Inpp5d	Bcr	0.199555
Mapk11	4.27942	Predicted	0								Pik3cg	Bcr	1
Mapk12	4.27942	Predicted	0								Bcl2	Becn1	0.243027
Mapk13	4.27942	Predicted	0.0084								Ralb	Becn1	0.255406
Ikbke	4.25714	Intermediate	0								Nfkb1	Birc2	2.22527
Il12a	4.1994	Intermediate	0								Nfkb1	Birc3	2.22527
Nfkbiz	4.19814	Early	0.0002								Nfkb1	Birc7	2.22527
Hras1	4.18709	Early	0								Smarcc1	Brd7	0.622933
Kras	4.18709	Predicted	0.0002								Top1	Btbd2	0.402164
Nras	4.18709	Predicted	0.0004								Cav1	Btk	1.26428
Ptk2	4.12098	Predicted	0								Cd40	Btk	0.59897
Nfe2l2	4.10175	Intermediate	0								Elane	C1qa	0.238215
Map3k14	4.08708	Predicted	0.0078								Ppp1ca	C1qa	0.422503
Hspa9	4.08615	Intermediate	0								Calr	C1qb	0.636634
Cd14	4.04638	Intermediate	0.0002								Myoc	C1qb	0.317464
Rhoa	4.02676	Predicted	0								Elane	C1qc	0.802281
Pik3r3	4.0254	Predicted	0								Csnk2a1	C1ra	0.64566
Il12rb1	4	Predicted	0.0008								Abl1	C3	1
Sp3	3.93396	Predicted	0								Ctsg	C3	0.467523
Atf3	3.92019	Predicted	0								C3	C3-Cfb	0.467523
Tnfaip3	3.90735	Early	0								Cfh	C3-Cfb	0.532477
Ereg	3.85421	Early	0.0018								Ppp1cb	Calm1	1.11258
Rac1	3.83018	Predicted	0								Nos2	Calm2	0.94965
Junb	3.80008	Early	0								Ppp1cb	Calm2	1.20911
Grb2	3.78919	Predicted	0								Ppp1cb	Calm3	1.11258
Pik3r1	3.75555	Early	0								Itga3	Calr	0.568923
Mapk6	3.73517	Intermediate	0								Itgav	Calr	0.0677115
Stat1	3.53709	Predicted	0								Ppp1cb	Camk2a	0.516683
Rac2	3.44117	Predicted	0.0016								Ctsg	Camp	0.3477
Htra2	3.41772	Intermediate	0								Elane	Camp	1
Dusp1	3.4094	Early	0.0002								Igf1r	Camp	0.39405
Sfpq	3.38827	Intermediate	0								Prtn3	Camp	1
Jak3	3.36511	Predicted	0								Abcc2	Canx	0.248467
Atf4	3.2631	Early	0.0004								Il1a	Capn1	1
Casp8	3.22527	Predicted	0								Hspd1	Car2	0.493865
Il12b	3.22527	Predicted	0								Bcl10	Card9-Malt1-Bcl10	1.3493
Hp	3.21925	Late	0.0002								Malt1	Card9-Malt1-Bcl10	0.875975
Ccnd1	3.20911	Predicted	0								Sdc1	Cask	0.274855
Rac3	3.19814	Predicted	0.0018								Il18	Casp1	1
Stat5b	3.18467	Predicted	0								Il1b	Casp1	1
Irf2	3.13542	Intermediate	0								Pycard	Casp1	0.49802
Ikbkb	3.13273	Predicted	0								Met	Casp3	1.12383
Ikbkg	3.13273	Early	0								Rel	Casp4	1.37534
Pik3ap1	3.13131	Intermediate	0								Stat1	Casp4	0.104928
Ccnb2	3.1137	Predicted	0.0014								Birc7	Casp6	0.152961
Cdk1-Ccnb2	3.1137	Predicted	0.0026								Xiap	Casp6	0.807516
Sfpi1	3.08251	Early	0								Il1b	Casp8	1
Tollip	3.0545	Intermediate	0								Nfkb1	Casp8	2.22527
Elane	3.04049	Predicted	0								Pik3r5	Casp9	0.970005
Il1r2	3	Early	0.0002								Ets1	Cav1	1.95353
Smarcc1	2.99946	Predicted	0								Etv4	Cav1	0.979448
Tyrobp	2.99946	Predicted	0								Etv5	Cav1	1.95353
Syk	2.98173	Predicted	0								Ptgs2	Cav1	1.05064
Tnfrsf1b	2.97786	Intermediate	0								Sp1	Cav1	1.95353
Tyk2	2.93723	Predicted	0.0004								Fnbp1	Cbl	0.067416
Camp	2.74175	Late	0								Abl1	Cblb	0.300818
Il1r1	2.72031	Late	0								Grb2	Cblc	0.799135
Prkcd	2.64893	Predicted	0								Src	Cblc	0.879298
Mapk14	2.61718	Intermediate	0								Ccrl2	Ccl2	1.29074
Pik3cd	2.60998	Intermediate	0.0002								Stat1	Ccl2	1.29074
Srgn	2.58561	Intermediate	0								Cebpa	Ccl3	0.0177539
Ccl2	2.58148	Intermediate	0								Fos	Ccl3	0.841378
Yy1	2.52944	Predicted	0								Irf5	Ccl3	7.21167
Nr4a1	2.51489	Early	0.003								Jun	Ccl3	5.81541
Abl1	2.50037	Predicted	0								Atf3	Ccl4	3.92019
Casp1	2.49802	Predicted	0								Fos	Ccl4	1.22971
Itk	2.44255	Predicted	0.0004								Nfkb1	Ccl5	2.22527
Sirpb1a	2.41318	Intermediate	0								Ccr2	Ccl6	1.14761
Pik3r2	2.35914	Intermediate	0								Cxcr4	Ccl6	0.615876
Il21r	2.35522	Intermediate	0.0006								Ccnb2	Ccnb1	1
Gnai3	2.31704	Intermediate	0								Gadd45b	Ccnb2	3.1137
Erbb2	2.29971	Predicted	0								Gadd45b	Ccnb3	2
Gsk3b	2.29971	Predicted	0								Nfkb1	Ccnd1	2.22527
Prkcz	2.29971	Predicted	0.0008								Stat5a	Ccnd1	0.983839
Tank	2.2577	Intermediate	0								Fas	Ccnd3	0.00477846
Il7r	2.23774	Predicted	0.0002								Stat5a	Ccnd3	1.00631
Raf1	2.22528	Predicted	0.0002								Ccl3	Ccr2	4.17964
Card9-Malt1-Bcl10	2.22527	Predicted	0.004								Ccl4	Ccr2	2.5339
Pkn1	2.22527	Predicted	0								Cxcl1	Ccr2	1.17208
Tlr4	2.22527	Predicted	0								Cxcl2	Ccr2	4.48373
Hspb1	2.22527	Predicted	0.0002								Ccr2	Ccr5	0.159083
Ikbkb-Chuk-Ikbkg	2.22527	Predicted	0.0038								Ccl2	Ccr9	0.76349
Map3k1	2.22527	Early	0.0002								Ccl5	Ccr9	1
Map3k7	2.22527	Predicted	0								Sfpi1	Cd14	2.08251
Pkn3	2.22527	Predicted	0.0038								Tlr2	Cd14	0.8291
Bcl2	2.22527	Predicted	0								Tnfrsf1b	Cd14	1.13477
Birc2	2.22527	Predicted	0								Hcrtr2	Cd200	0.263105
Birc3	2.22527	Early	0								Cd200	Cd200r2	0.263105
Birc7	2.22527	Predicted	0								4930544G11Rik	Cd209a	1
Ccl5	2.22527	Predicted	0								4930544G11Rik	Cd209g	0.175311
Cebpg	2.22527	Predicted	0.0052								Inpp5d	Cd22	0.96976
Csf3	2.22527	Intermediate	0								Ptpn6	Cd22	0.0302396
Figf	2.22527	Predicted	0.0152								Il12a	Cd28	1.21049
Il18	2.22527	Predicted	0								Irf3	Cd40	1.71726
Pgf	2.22527	Early	0.0134								Sp1	Cd40	1.71726
Ppp2ca	2.22527	Predicted	0								Sp3	Cd40	1.71726
Ppp2cb	2.22527	Predicted	0								Srgn	Cd44	1.23026
Ppp2r1a	2.22527	Predicted	0								Lgals1	Cd8a	0.56458
Ppp2r1b	2.22527	Predicted	0.0042								Cdk1-Ccnb2	Cdc25c	1
Ppp2r2a	2.22527	Predicted	0.0096								Pik3r5	Cdc42	1.29971
Ppp2r2b	2.22527	Predicted	0.0006								Rap1b	Cdc42	0.70029
Ppp2r2c	2.22527	Predicted	0.0098								Cdk1-Ccnb2	Cdk1	1
Ppp2r2d	2.22527	Predicted	0.0122								Gadd45b	Cdk1-Ccnb2	3.1137
Traf3	2.22527	Predicted	0								Ccnb2	Cdk2	1
Traf4	2.22527	Predicted	0.0002								Ccnb3	Cdk2	1
Vegfa	2.22527	Early	0.0006								Ezr	Cdk5	1.03144
Vegfb	2.22527	Predicted	0.001								Ccnb2	Cdkn1a	1
Vegfc	2.22527	Predicted	0.0114								Cdk2	Cebpa	1
Xiap	2.22527	Predicted	0								Cdkn1a	Cebpa	0.0177539
Ripk2	2.22527	Early	0								Atf4	Cebpb	1
Pygl	2.22516	Intermediate	0.0002								Ccl3	Cebpb	2.85922
Myd88-Tollip-Tirap	2.2167	Predicted	0.0034								Rela	Cebpb	0.972867
Tlr2-Cd14	2.2167	Predicted	0.0008								Nfkb1	Cebpg	2.22527
Marcks	2.19791	Intermediate	0								C3	Cfb	1
Eif2ak1	2.19136	Predicted	0.0004								C3-Cfb	Cfb	1
Ifng	2.17531	Predicted	0.0004								Sell	Cfh	0.532477
4930544G11Rik	2.17531	Predicted	0								Nlrp2	Chuk	0.19814
Plcg1	2.17531	Predicted	0								Tnf	Chuk	1
Plcg2	2.17531	Predicted	0								Nfkbia	Cish	1
Calm2	2.15876	Predicted	0								Ckm	Ckb	0.532957
Gnai1	2.14761	Predicted	0.001								Ppp1ca	Ckb	1
Fpr2	2.12234	Late	0								Mef2a	Ckm	0.532957
Ptpn1	2.10337	Late	0								Ptpn6	Clec4a1	0.831371
Tab1	2.08251	Predicted	0								Dnm1	Clic4	0.29971
Fos	2.07109	Early	0.0124								App	Clstn1	0.392275
Prkca	2.01519	Predicted	0								Socs1	Cntfr	1.90961
Il10ra	2.01248	Early	0.0002								Socs3	Cntfr	0.102862
Il10rb	2.01248	Predicted	0								Capn1	Col1a1	0.518225
Il6ra	2.01248	Predicted	0.0002								Mmp13	Col2a1	0.999996
Stat4	2.01248	Predicted	0								Aatf	Cpd	0.765667
Stat6	2.01248	Predicted	0.0002								Clstn1	Cpd	0.392275
Cntfr	2.01247	Predicted	0.011								Socs1	CR974586.2	1.90961
Ifnar2	2.01247	Predicted	0.0076								Camk2a	Creb1	0.516683
Il22ra1	2.01247	Predicted	0.0088								Ppp1cb	Creb1	1.20911
Il9r	2.01247	Predicted	0.01								Ppp1cb	Creb3	0.129029
Ccnb3	2	Predicted	0.003								Ppp1cb	Creb3l3	1
Cdc42	2	Predicted	0								Itgb5	Crk	1.01519
Cdk2	2	Predicted	0.001								Socs1	Csf2rb2	1.29971
Cfb	2	Late	0.0006								Cebpg	Csf3	2.22527
Il10rb-Il10ra	2	Predicted	0.0036								Ddit3	Csnk2a1	0.642378
Il6st-Il6ra	2	Predicted	0.0044								Plekho1	Csnk2a1	0.00328
Jun-Fosb	2	Predicted	0.0054								Hsp90aa1	Csnk2a2	0.0400417
Marco	2	Late	0.0008								Socs1	CT868723.4	1.90961
Plk1	2	Predicted	0								Met	Ctnnd1	1.67843
Ppp1ca	2	Predicted	0								Marcks	Ctsb	0.804031
Prkacb	2	Predicted	0.0022								A2m	Ctse	0.589056
Nfkb1-Rela	2	Predicted	0.0018								Sdc1	Ctsg	0.815223
Eif2ak3	1.99094	Predicted	0.0002								Sars2	Cul1	0.248467
Egfr	1.98877	Predicted	0								Myd88	Cxcl1	8.39584
Irf1	1.97287	Early	0.0002								Ccr2	Cxcl16	1.14761
Lcn2	1.97287	Late	0.0004								Cxcr4	Cxcl16	0.07983
Gna12	1.96387	Predicted	0								Myd88	Cxcl2	7.81985
Ets1	1.95353	Predicted	0								Ccl2	Cxcr2	0.527253
Etv5	1.95353	Predicted	0								Adrbk1	Cxcr4	0.97771
Gfi1b	1.90962	Predicted	0.0002								Ccl3	Cxcr4	4.26175
Stat2	1.90961	Predicted	0								Ccl4	Cxcr4	2.61601
CR974586.2	1.90961	Predicted	0.0102								Cxcl1	Cxcr4	2.87278
CT868723.4	1.90961	Predicted	0.0112								Cxcl2	Cxcr4	3.33613
Gm13305	1.90961	Predicted	0.0098								Ccl5	Cxcr5	1
Gm2002	1.90961	Predicted	0.0124								Pla2g4a	Cybb	0.489685
Il13ra1	1.90961	Predicted	0.0124								Rac1	Cybb	0.632042
Il13ra2	1.90961	Predicted	0.0132								Tnfrsf1b	Daxx	1.84309
Il15ra	1.90961	Predicted	0.0124								Nfe2l2	Ddit3	1.24847
Il20ra	1.90961	Predicted	0.0092								Btk	Ddx5	0.909747
Il20rb	1.90961	Late	0.011								Pik3ca	Ddx5	0.14954
Il22ra2	1.90961	Predicted	0.015								Pik3r5	Dnm1	1.29971
Il28ra	1.90961	Predicted	0.0098								Dnm1l-Amph	Dnm1l	1
Il2ra	1.90961	Predicted	0.014								Pik3r5	Dnm1l-Amph	1
Lifr	1.90961	Predicted	0.0114								Pik3r5	Dnm2	1.29971
Btk	1.86325	Intermediate	0								Pik3r5	Dnm3	1.29971
Lta	1.84309	Predicted	0.0036								Nck1	Dok2	0.0514311
Daxx	1.84309	Predicted	0.0002								Ppp2ca	Dpt	1
Tgfbi	1.84108	Late	0.0002								Arrb2	Dusp16	0.54207
Insr	1.79761	Predicted	0								Creb1	Dusp16	1.72579
Itga3	1.76874	Predicted	0								Mapk14	Dusp16	1.18372
Srf	1.76874	Predicted	0.0004								Prdm1	Dusp16	1.72579
H2-M2	1.76546	Late	0.0002								Arrb1	Dvl2	0.627776
Ccr9	1.76349	Predicted	0.0002								Epha8	Efna1	0.378925
Ccl6	1.76349	Late	0.0002								Ppbp	Efna1	1
Zbp1	1.74038	Late	0.0012								Epha5	Efna2	0.995402
Eif2ak2	1.73024	Predicted	0.0004								Epha8	Efna5	0.621075
Prdm1	1.72579	Early	0.0044								Src	Efna5	0.879298
Creb1	1.72579	Predicted	0.0128								Grb2	Egf	1
Irf3	1.71726	Predicted	0								Ereg	Egfr	1
Rgs2	1.71127	Intermediate	0.0002								Fas	Egfr	0.988771
Smurf1	1.68273	Predicted	0								Ereg	Egfr-Egfr	1
Itga5	1.68222	Early	0								G3bp1	Egr1	0.375936
Nedd4	1.67844	Predicted	0								Hcfc1	Egr2	0.626417
Cblc	1.67843	Predicted	0.0034								Hsp90aa1	Eif2ak1	0.982246
Fgf2	1.67843	Predicted	0								Ppp1cb	Eif2ak1	1.20911
Mitf	1.67843	Predicted	0								Hsp90aa1	Eif2ak2	0.521127
Nedd4l	1.67843	Predicted	0								Ppp1cb	Eif2ak2	1.20911
Smurf2	1.67843	Predicted	0								Hsp90aa1	Eif2ak3	0.781835
Itch	1.67843	Predicted	0								Ppp1cb	Eif2ak3	1.20911
Ctnnd1	1.67843	Predicted	0								Ppp1cb	Eif2ak4	1.20911
Shc2	1.67843	Predicted	0.0046								Htra2	Eif4g1	0.999998
Shc3	1.67843	Predicted	0.0014								Csf3	Elane	2.22527
Shc4	1.67843	Predicted	0.0048								Sdc1	Elane	0.815223
Mdm2	1.67843	Early	0								Hif1a	Ep300	0.979448
Adora2b	1.66679	Intermediate	0.0014								Cask	Epb4.1	0.274855
Gnas	1.66679	Predicted	0.0048								Cd44	Epb4.1	0.171449
Smarca2	1.66083	Intermediate	0								Efna1	Epha4	1.37893
Sod2	1.66083	Intermediate	0								Efna2	Epha4	0.995402
Hsf1	1.63056	Predicted	0.0002								Efna5	Epha4	1.50037
Slpi	1.59508	Late	0.001								Egr2	Epha4	0.626417
Pim2	1.59233	Intermediate	0.0016								Ppp2ca	Epha5	0.995402
A2m	1.58906	Predicted	0								Pik3cg	Epha8	1
Tnfsf9	1.56417	Early	0.0022								Jak2	Erbb2	2.01248
Ltbp1	1.55508	Predicted	0								Vegfc	Erbb2	0.287233
Lox	1.53989	Late	0								Ereg	Erbb4	0.854212
Acpp	1.53874	Late	0.0006								Ereg	Erbb4-Erbb4	1
Nr4a2	1.53544	Predicted	0								Ptpn23	Esr2	0.0804441
Ckb	1.53296	Late	0.0006								Daxx	Ets1	0.85432
Socs2	1.50493	Predicted	0.0008								Smarca2	Ets1	0.219911
Efna5	1.50037	Predicted	0								Src	Ets1	0.879298
Ngef	1.50037	Predicted	0.0006								Mapk1	Ets2	2.99946
Rasa1	1.50037	Predicted	0.0016								Mapk3	Ets2	2.99946
Il12rb2-Il12rb1	1.49446	Predicted	0.014								Src	Ets2	1
Mef2a	1.48862	Intermediate	0								Ep300	Etv4	0.979448
Pycard	1.48027	Predicted	0.0002								Ar	Etv5	1
Casp4	1.48027	Intermediate	0.0004								Selplg	Etv5	0.953529
Mefv	1.48026	Intermediate	0.0006								Casp8	Ezr	1.03144
Rnf11	1.47801	Intermediate	0								Cd44	Ezr	1.03144
C3	1.46752	Predicted	0								Clic4	Ezr	0.29971
Marcksl1	1.45102	Intermediate	0.0008								Icam1	Ezr	1.60338
Ptprj	1.44453	Intermediate	0								Prkaca	Ezr	0.697918
Ube2i	1.42826	Predicted	0								Prkacb	Ezr	0.730839
Top1	1.42467	Intermediate	0								Prkcb	Ezr	1.03144
Fes	1.40294	Intermediate	0.0006								Prkcg	Ezr	1.03144
Siglece	1.39245	Late	0.0002								Ptk2	Ezr	0.873352
Efna1	1.37892	Predicted	0.0004								Rhoa	Ezr	0.920757
Rel	1.37534	Early	0.0004								Sdc2	Ezr	1.03144
Irak3	1.36644	Intermediate	0								Slc9a3r1	Ezr	0.01199
Tlr2-Tlr1	1.36205	Predicted	0								Insr	Fabp4	0.797606
Tlr6	1.36205	Predicted	0.0002								Ezr	Fadd	0.01122
Mavs	1.34974	Intermediate	0								Fas	Fadd	0.988771
Bcl10	1.3493	Intermediate	0.0002								Calm2	Fas	0.988771
S100a9	1.34182	Late	0.0006								Casp8	Fas	0.988771
Xcr1	1.33124	Predicted	0.0002								Cav1	Fas	1.47115
Gtf2i	1.32929	Intermediate	0								Daxx	Fas	0.988771
Ptk2b	1.31182	Predicted	0.001								Ifngr1	Fas	1.01433
Nck1	1.31119	Intermediate	0								Met	Fas	0.775128
Csf2rb2	1.29971	Predicted	0.0102								Nfkb1	Fas	1.60702
Dnm1	1.29971	Predicted	0.0008								Rhoa	Fas	0.988771
Dnm2	1.29971	Predicted	0.0014								Ltbp1	Fbn1	0.539894
Dnm3	1.29971	Predicted	0.0028								Inpp5d	Fcgr2b	0.96976
Il3ra	1.29971	Predicted	0.01								Hck	Fcgr3	0.03455
Irs3	1.29971	Predicted	0.0086								Inpp5d	Fcgr3	0.96976
Irs4	1.29971	Predicted	0.0076								Alb	Fcgrt	0.492136
Mtor	1.29971	Predicted	0.0062								Dnm3	Fer	0.232294
Pdpk1	1.29971	Predicted	0.0024								Jak2	Fes	1.40294
Prex1	1.29971	Predicted	0.0132								S100a13	Fgf1	1
Prkci	1.29971	Predicted	0.0006								Pf4	Fgf2	0.86321
Slc2a4	1.29971	Predicted	0.0016								Sdc1	Fgf2	0.815223
Txk	1.29971	Predicted	0.0072								Flrt3	Fgfr1	1
Fyn	1.29971	Predicted	0.0002								Inpp5d	Fgr	0.0519669
Kit	1.29971	Predicted	0								Nfkb1	Figf	2.22527
Ccrl2	1.29074	Early	0								Itgb5	Flnb	0.858191
Ncor2	1.27757	Intermediate	0								Hsp90aa1	Flt3	0.229794
Rasgrp2	1.26916	Predicted	0.0138								Inpp5d	Flt3	0.96976
Araf	1.26916	Predicted	0.0002								Shc3	Flt4	0.937767
Rapgef3	1.26578	Predicted	0.0094								Dnm3	Fnbp1	0.067416
Map3k5	1.25354	Intermediate	0.0004								Atf4	Fos	1
Inhba	1.24982	Intermediate	0.0006								Kras	Fos	0.0982246
Acvr1b	1.24982	Intermediate	0.0006								Rela	Fos	0.972867
Abcc2	1.24847	Predicted	0.0052								Atf4	Fosb	1
Ddit3	1.24847	Predicted	0.0008								Camp	Fpr2	1
Sars2	1.24847	Predicted	0.0054								Fpr3	Fpr2	0.12234
Alox5	1.23164	Intermediate	0								Fpr-rs7	Fpr2	1
Cd44	1.23026	Predicted	0								Camp	Fpr3	0.12234
Cxcl16	1.22744	Late	0.0006								Camp	Fpr-rs7	1
Pxn	1.22399	Intermediate	0								Gsk3b	Fus	0.935577
Sdc4	1.22399	Intermediate	0								Sirpa	Fyb	0.0615007
Gbp2	1.21689	Late	0								Src	Fyb	0.879298
Cd28	1.21049	Predicted	0.0032								Vasp	Fyb	0.10403
Ppp1r1a	1.20911	Predicted	0.0058								Fas	Fyn	0.988771
Prkg1	1.20911	Predicted	0.0004								Txk	Fyn	0.310938
Ppp1r14a	1.20911	Predicted	0.0078								Ikbke	G3bp1	0.375939
Ppp1r1b	1.20911	Predicted	0.0016								Shc4	Gab1	0.678433
Atf2	1.20911	Predicted	0.014								Hck	Gab2	1.14284
Eif2ak4	1.20911	Predicted	0.0088								Nfkb1-Rela	Gadd45b	2
Rock2	1.20911	Predicted	0.0012								Stat3	Gadd45b	3.1137
Rock1	1.20911	Predicted	0								Trp53	Gadd45b	3.1137
Mapk7	1.20895	Predicted	0								Mapk6	Gata1	0.933791
Igf1	1.20895	Predicted	0.001								Btbd2	Gbp2	0.402164
Ins1	1.20895	Predicted	0.0004								Gsk3b	Gbp2	0.814729
Ins2	1.20895	Predicted	0.0002								Notch1	Gfi1b	0.345445
Pias2	1.19956	Predicted	0								Traf1	Gfi1b	1.56417
Bcr	1.19955	Predicted	0.0006								Atp7b	Glrx	0.138708
Pias1	1.19955	Predicted	0.001								Casp3	Glrx	0.0571315
Flt3	1.19955	Predicted	0.001								Ptpn1	Glrx	1
Myc	1.19955	Predicted	0								Socs1	Gm13305	1.90961
Pim1	1.19955	Predicted	0.003								Socs1	Gm2002	1.90961
Socs4	1.19955	Predicted	0								Cd14	Gna12	1.96387
Socs5	1.19955	Predicted	0								Adcy5	Gnai1	1
Socs7	1.19955	Predicted	0.0032								Ccr2	Gnai1	1.14761
Chuk	1.19814	Predicted	0								Ccr2	Gnai2	1.14761
Glrx	1.19584	Late	0								Ccr2	Gnai3	1.00694
Prmt5	1.19158	Intermediate	0								Cxcr4	Gnai3	1.08905
Nfkbie	1.18914	Intermediate	0								Rgs2	Gnai3	0.22105
Hcls1	1.17923	Late	0.0004								Adora2b	Gnas	1.66679
Pilrb1	1.17909	Late	0.001								Alpi	Gpld1	0.105557
Relb-Nfkb2	1.15986	Predicted	0.0016								Gata1	Gpx1	0.933791
Cpd	1.15794	Late	0.0004								Alox5	Grb2	0.997865
Arrb2	1.14761	Predicted	0								Pik3ap1	Grb2	1.04377
Gnai2	1.14761	Predicted	0.0114								Shc4	Grb2	1
Ptprc	1.14285	Predicted	0								Sirpb1a	Grb2	0.747556
Gab2	1.14284	Predicted	0								Ppp1cb	Grin1	1
Shc1	1.14284	Predicted	0								Dnm1l	Gsk3b	1
Casp3	1.12383	Intermediate	0								Pik3r5	Gsk3b	1.29971
Cybb	1.12173	Late	0.0006								Mcm2	Gtf2b	0.113698
Calm1	1.11258	Predicted	0.0014								Jak2	Gtf2i	1.32929
Calm3	1.11258	Predicted	0.0014								H2afv-Hist1h2ba	H2afv	0.456822
Ripk3	1.11258	Predicted	0								Hdac6	H2afv-Hist1h2ba	0.456822
Vav1	1.0911	Predicted	0								Rela	H2-K1	0.972867
Kdr	1.08734	Predicted	0.0002								AC160982.1	H2-M2	0.22801
Itgav	1.0829	Predicted	0.0002								Cd8a	H2-M2	0.56458
Irf8	1.06822	Intermediate	0								H2-K1	H2-M2	0.972867
Ass1	1.0664	Late	0.0014								AC160982.1	H2-T22	0.454011
Ddx5	1.05929	Intermediate	0								Il1a	Hax1	1
Fyb	1.04483	Late	0.0002								Cdk1	Hcfc1	0.626417
Bcl3	1.03967	Intermediate	0								Dnm2	Hck	0.420414
Prkcb	1.03145	Predicted	0.0002								Gnai1	Hck	1.14284
Prkcg	1.03145	Predicted	0.0006								Gnai2	Hck	1.14284
Actg1	1.03144	Predicted	0								Il6st	Hck	1
Cdk5	1.03144	Predicted	0								Pik3cb	Hck	1.14284
Sdc2	1.03144	Predicted	0.0006								Pik3r2	Hck	0.828262
Sell	1.03144	Late	0								Plcg2	Hck	0.223927
Cebpa	1.01775	Early	0								Ptprc	Hck	1.14284
Crk	1.01519	Predicted	0.0092								Hax1	Hcls1	0.461996
Zbtb17	1.01519	Predicted	0								Src	Hcls1	0.717234
Ccnd3	1.01109	Intermediate	0								Npffr2	Hcrt	0.263105
Mknk2	1.00539	Intermediate	0								Hcrt	Hcrtr2	0.263105
Fcgr3	1.00431	Predicted	0								Hsp90aa1	Hdac6	0.456822
Sash3	1.0043	Intermediate	0								Mtor	Hif1a	0.979448
Smad4	1.0043	Predicted	0								Ndn	Hif1a	0.979448
Ppbp	1	Predicted	0								Nr4a1	Hif1a	0.979448
Tnfrsf1a	1	Predicted	0								Smarca2	Hif1a	0.850663
Actn4	1	Predicted	0								Vcp	Hif1a	0.979448
Adcy2	1	Predicted	0.0064								Brd7	Hist2h3b	0.622933
Adrb2	1	Early	0.0002								Stat6	Hist2h3b	0.102862
Ar	1	Predicted	0								Slc2a4	Hk2	0.317467
Arhgap26	1	Predicted	0.0042								Il1b	Hmgb1	1
C3-Cfb	1	Predicted	0.0002								Apoa1	Hp	0.219255
Capn1	1	Predicted	0								Cd22	Hp	1
Ccnb1	1	Predicted	0.005								Itgb2	Hp	1
Cd209a	1	Predicted	0								Itgb2l	Hp	1
Cdc25c	1	Predicted	0.0058								Met	Hras1	1.67843
Cdk1	1	Predicted	0								Pik3r5	Hras1	1.29971
Cdkn1a	1	Early	0								Rps6ka2	Hras1	1.20895
Cish	1	Early	0.0036								Hsp90aa1	Hsf1	0.982246
Creb3l3	1	Predicted	0.0078								Rela	Hsf1	0.64831
Cxcr5	1	Predicted	0.001								Bcl2	Hsp90aa1	0.982246
Dnm1l	1	Predicted	0.0444								Calm2	Hsp90aa1	0.982246
Dnm1l-Amph	1	Predicted	0.008								Cdkn1a	Hsp90aa1	0.982246
Dpt	1	Predicted	0.0002								Fes	Hsp90aa1	0.887826
Egf	1	Predicted	0.0064								Gna12	Hsp90aa1	0.982246
Egfr-Egfr	1	Predicted	0.0094								Jak2	Hsp90aa1	1.49736
Epha8	1	Predicted	0.0038								Nfkbib	Hsp90aa1	1.4866
Erbb4-Erbb4	1	Predicted	0.0074								Nlrp3	Hsp90aa1	0.982246
Fgf1	1	Predicted	0.0008								Pdpk1	Hsp90aa1	0.982246
Fgfr1	1	Predicted	0								Ppp2r1a	Hsp90aa1	0.982246
Flrt3	1	Early	0.0026								Prkci	Hsp90aa1	0.982246
Fosb	1	Predicted	0.0046								Prmt5	Hsp90aa1	0.676465
Fpr-rs7	1	Predicted	0								Ripk3	Hsp90aa1	0.112575
Grin1	1	Predicted	0.0072								Skp1a	Hsp90aa1	0.982246
Hax1	1	Predicted	0								Slc2a4	Hsp90aa1	0.982246
Hmgb1	1	Predicted	0.001								Tab1	Hsp90aa1	0.0915589
Ifnar1	1	Predicted	0.0134								Vegfa	Hsp90aa1	0.54684
Ifngr2	1	Predicted	0.0042								Hsf1	Hspa1l	1.63056
Igfbp7	1	Predicted	0.0006								Nfkbib	Hspa1l	1.81075
Il12rb1-Il23r	1	Predicted	0.0184								Nfkbie	Hspa1l	0.24118
Il1rap-Il1r1	1	Predicted	0.0232								Tank	Hspa1l	0.18068
Il1rap-Il1r2	1	Predicted	0.015								Traf2	Hspa1l	1.0285
Il23r	1	Predicted	0.0284								Arrb1	Hspa9	0.517903
Il2rb	1	Predicted	0.0008								Nfkbib	Hspa9	1.6765
Il6st	1	Predicted	0.0006								Tab2	Hspa9	0.997498
Irak1	1	Predicted	0.0012								Traf2	Hspa9	0.894244
Irf4	1	Early	0.0044								Eif4g1	Hspb1	1
Itgb2	1	Predicted	0.0004								Il7r	Hspb1	0.225273
Itgb2l	1	Predicted	0.0004								Nfkbia	Hspb1	1
Mmp13	1	Intermediate	0.0064								Itga3	Hspd1	0.184629
Mmp19	1	Late	0.0022								Ppp2r1a	Hspd1	0.309236
Mmp2	1	Predicted	0								Birc2	Htra2	0.200786
Mtap1a	1	Predicted	0.0024								Birc3	Htra2	1.07231
Ndn	1	Predicted	0.0012								Birc7	Htra2	1.07231
Nlrp10	1	Predicted	0.0016								Xiap	Htra2	1.07231
Nlrp2	1	Predicted	0.0002								Egr1	Icam1	2.17531
Ntrk1	1	Predicted	0.0016								Ifng	Icam1	2.17531
Pla2g4a	1	Late	0.0008								Itgb2l-Itgam	Icam1	0.443516
Pld1	1	Predicted	0								Relb-Nfkb2	Icam1	1.15986
Prkaca	1	Predicted	0.0014								Sp1	Icam1	2.17531
Prkce	1	Predicted	0.006								Tnf	Icam1	2.17531
Prtn3	1	Predicted	0.0004								Ezr	Icam2	0.443513
Rhob	1	Predicted	0								Socs3	Ifnar1	1
Runx2	1	Predicted	0.0018								Socs1	Ifnar2	1.90961
S100a13	1	Predicted	0.0014								Socs3	Ifnar2	0.102862
Saa3	1	Late	0.002								Ifngr1	Ifng	1.03989
Scgb3a1	1	Predicted	0.0044								Ifngr1-Ifngr2	Ifng	0.135421
Scgb3a2	1	Predicted	0.0012								Ifngr2	Ifng	1
Skp1a	1	Predicted	0								Canx	Ifngr1	0.248468
Slc9a3r1	1	Predicted	0								Jak2	Ifngr1	1.52618
Smad7	1	Predicted	0								Socs2	Ifngr1	0.61157
Stap2	1	Predicted	0.0012								Socs3	Ifngr1	1.03989
Tirap	1	Predicted	0								Socs4	Ifngr1	1.03989
Tlr13	1	Predicted	0.0006								Socs7	Ifngr1	1.03989
Tlr7	1	Predicted	0.0002								Stat4	Ifngr1	0.102863
Tlr9	1	Predicted	0.0006								Jak2	Ifngr1-Ifngr2	0.13542
Unc93b1	1	Predicted	0.0002								Socs1	Ifngr2	1
Vcp	1	Predicted	0								Ctsb	Igf1	0.208954
Zap70	1	Predicted	0.001								Igfbp7	Igf1	1
Acan	1	Predicted	0								Figf	Igf1r	0.54684
Cd22	1	Predicted	0								Pgf	Igf1r	0.137929
Eif4g1	0.999998	Predicted	0								Vegfc	Igf1r	0.259607
Tuba1a	0.999998	Predicted	0.0002								Ccl5	Igfbp7	0.184777
Tfcp2	0.999998	Predicted	0								Sdc1	Igfbp7	0.815223
Col2a1	0.999996	Predicted	0								Irak2	Ikbkb	1.00338
Fadd	0.999991	Predicted	0								Nlrp2	Ikbkb	0.214926
Tab2	0.997495	Intermediate	0.0002								Pygl	Ikbkb	1.11258
Efna2	0.995402	Predicted	0.0002								Tnf	Ikbkb	0.801846
Epha5	0.995402	Predicted	0.0058								Chuk	Ikbkb-Chuk-Ikbkg	0.225273
Lck	0.988771	Predicted	0.001								Ikbkb	Ikbkb-Chuk-Ikbkg	1
Sumo1	0.988771	Predicted	0.0018								Ikbkg	Ikbkb-Chuk-Ikbkg	1
Atp6v1e1	0.988007	Intermediate	0.0004								Nr4a1	Ikbke	1.53544
Mmp14	0.983667	Late	0.0008								Nr4a2	Ikbke	1.53544
Nlrp3	0.982246	Early	0.0008								Zbp1	Ikbke	1.18626
Lyn	0.981625	Predicted	0.0002								Nlrp2	Ikbkg	0.586933
Ep300	0.979448	Predicted	0								Tec	Ikbkg	0.981625
Etv4	0.979448	Predicted	0.008								Traf1	Ikbkg	1.56417
Adrbk1	0.97771	Predicted	0.015								Cd209a	Il10	1
Pilra	0.976205	Late	0.0002								Cd209g	Il10	0.175311
H2-K1	0.972867	Predicted	0.0014								Cebpb	Il10	3.83209
Casp9	0.970005	Intermediate	0.0024								Junb	Il10	3.80008
Fcgr2b	0.96976	Predicted	0.0004								Pla2r1	Il10	0.128052
Tlr3	0.964187	Predicted	0								Ptafr	Il10	0.897358
Casp6	0.960477	Predicted	0								Il10rb-Il10ra	Il10ra	1
Mafb	0.95788	Intermediate	0.0008								Socs1	Il10ra	1.01248
C1qb	0.954098	Late	0.0036								Il10rb-Il10ra	Il10rb	1
Selplg	0.953525	Predicted	0.0004								Socs1	Il10rb	1.01248
Igf1r	0.944376	Predicted	0								Il10	Il10rb-Il10ra	2
Flt4	0.937767	Predicted	0.0012								Fcgr2b	Il12a	0.96976
Fus	0.935577	Intermediate	0.0006								Il23a	Il12a	1.36977
Gata1	0.933791	Predicted	0.0006								Nfkb1	Il12a	1.85987
Gpx1	0.933791	Intermediate	0.001								Il23a	Il12b	1
Arl1	0.926137	Intermediate	0.0014								Nfkb1	Il12b	2.22527
Tax1bp1	0.922025	Intermediate	0								Il12b	Il12rb1	1
Ppp3cb	0.90703	Predicted	0.0014								Il12rb1-Il23r	Il12rb1	1
Ptafr	0.897358	Early	0								Il12rb2-Il12rb1	Il12rb1	1
Runx3	0.897231	Intermediate	0.0006								Il23a	Il12rb1	1
Actb	0.895257	Predicted	0								Il23a	Il12rb1-Il23r	1
Malt1	0.875975	Early	0.0002								Il12b	Il12rb2	0.225273
Psme2	0.864969	Late	0.001								Il12rb2-Il12rb1	Il12rb2	0.494457
Pf4	0.863212	Predicted	0.001								Il12a	Il12rb2-Il12rb1	1.49446
Flnb	0.858191	Predicted	0.0002								Socs1	Il13ra1	1.90961
Plekho1	0.858188	Intermediate	0								Socs1	Il13ra2	1.90961
Erbb4	0.854212	Predicted	0								Il2rg	Il15	0.561918
Pld2	0.85231	Predicted	0.0004								Socs1	Il15ra	1.90961
Ppap2a	0.85231	Late	0.006								Nfkb1	Il18	2.22527
Lsp1	0.849931	Late	0.0058								Il18	Il18rap	0.71084
Klk1b11	0.847666	Late	0.0006								Nfkb1	Il1a	0.811614
Tnfrsf14	0.843092	Predicted	0.0004								Nfkb1	Il1b	2.22527
Jup	0.841781	Late	0								Il1rap-Il1r1	Il1r1	1
Clec4a1	0.831371	Late	0.0028								Irak2	Il1r1	1.00338
Tnfsf11	0.827687	Predicted	0.0044								Tollip	Il1r1	0.716927
Sepp1	0.821603	Late	0.0028								Il1a	Il1r2	1
Ctsg	0.815223	Predicted	0								Il1b	Il1r2	1
Mdk	0.815223	Predicted	0.0002								Il1rap-Il1r2	Il1r2	1
Ctsb	0.804031	Predicted	0								Il1a	Il1rap	0.635188
C1qc	0.802281	Late	0.008								Il1a	Il1rap-Il1r1	1
Fabp4	0.797606	Late	0.0028								Il1a	Il1rap-Il1r2	1
Pdgfb	0.784972	Intermediate	0.0006								Il18	Il1rl2	0.514433
Aatf	0.765667	Predicted	0								Socs1	Il20ra	1.90961
Mapt	0.765667	Predicted	0								Socs1	Il20rb	1.90961
Irs2	0.764531	Early	0.0028								Cbl	Il21r	0.067416
Ly6a	0.753284	Late	0.0014								Socs3	Il21r	1.17761
Wwp1	0.748634	Predicted	0.0004								Socs4	Il21r	0.159665
Axl	0.740665	Predicted	0.0016								Socs5	Il21r	0.950532
Ripk1	0.740377	Predicted	0.0002								Socs1	Il22ra1	1.90961
Sdc3	0.739541	Predicted	0.0018								Socs3	Il22ra1	0.102862
Ptpn11	0.727661	Predicted	0								Socs1	Il22ra2	1.90961
Hist2h3b	0.725795	Predicted	0								Il23a	Il23r	1
Il12rb2	0.71973	Predicted	0.0028								Socs1	Il28ra	1.90961
Il18rap	0.71084	Predicted	0.022								Socs1	Il2ra	1.90961
Pilrb2	0.694053	Late	0.0016								Socs3	Il2rb	1
AC160982.1	0.68202	Predicted	0								Socs1	Il2rg	0.561918
Gab1	0.678433	Early	0.0038								Socs1	Il3ra	1.29971
Ptpn18	0.676377	Late	0.001								Mapk10	Il6	2.23861
Vasp	0.667037	Intermediate	0								Mapk8	Il6	2.95701
C1qa	0.660718	Late	0.001								Mapk9	Il6	2.23861
C1ra	0.64566	Late	0.0068								Il6st-Il6ra	Il6ra	1
Csnk2a1	0.645658	Predicted	0								Socs1	Il6ra	1.01248
Rala	0.645603	Predicted	0.001								Il6st-Il6ra	Il6st	1
Stam2	0.640573	Intermediate	0.0008								Il6	Il6st-Il6ra	2
Calr	0.636634	Predicted	0.0008								Irf2	Il7r	0.328135
Il1rap	0.635188	Intermediate	0.0032								Socs1	Il7r	1.90961
Dvl2	0.627776	Predicted	0.0002								Socs1	Il9r	1.90961
Scand1	0.627776	Late	0.0028								Socs3	Il9r	0.102862
Zfp263	0.627776	Intermediate	0.0004								Acvr1b	Inhba	1.24982
Egr2	0.626417	Early	0.0062								Dok2	Inpp5d	0.051434
Hcfc1	0.626417	Predicted	0.003								Gab1	Inpp5d	0.678433
Acvr1b-Acvr2b	0.624911	Predicted	0.0002								Gab2	Inpp5d	0.96976
Acvr2a-Acvr1b	0.624911	Predicted	0.0012								Jak3	Inpp5d	0.155786
Brd7	0.622933	Predicted	0								Met	Inpp5d	1.10032
Jund	0.606089	Predicted	0.001								Plcg1	Inpp5d	0.96976
Plau	0.606089	Intermediate	0.0024								Plcg2	Inpp5d	0.96976
Serpina5	0.606085	Predicted	0.0002								Igf1r	Ins1	0.275163
Ctse	0.589056	Late	0.006								Mapk6	Ins1	0.933791
Cd8a	0.56458	Predicted	0.0002								Igf1r	Ins2	0.275163
Lgals1	0.56458	Predicted	0.0004								Mapk6	Ins2	0.933791
Il15	0.561918	Late	0.005								Jak2	Insr	0.79761
Il2rg	0.561918	Predicted	0.0004								Pik3r3	Insr	1
Tnxb	0.54684	Predicted	0.0004								Ppp2cb	Irak1	0.209015
Fbn1	0.539894	Predicted	0.0002								Ppp2r1b	Irak1	0.209015
Pla2g4b	0.53874	Predicted	0.0164								Ppp2r2a	Irak1	0.356697
Shbg	0.53874	Predicted	0.0008								Ppp2r2b	Irak1	0.225273
Ckm	0.532957	Predicted	0.0004								Araf	Irak2	1.00338
Cfh	0.532477	Predicted	0.0004								Hras1	Irak2	1.00338
Cxcr2	0.527253	Late	0.0044								Il1rap	Irak2	0.635188
Col1a1	0.518225	Predicted	0								Mapkapk2	Irak2	1.52877
Camk2a	0.516683	Predicted	0.0118								Tnfaip3	Irak2	1.00338
Il1rl2	0.514433	Late	0.004								Tollip	Irak2	0.976218
Prkx	0.498552	Intermediate	0.0136								Casp6	Irak3	0.18153
Becn1	0.498433	Predicted	0								Irak2	Irak3	1.18491
Pink1	0.498433	Late	0.0048								Il12b	Irf1	1
Car2	0.493865	Late	0.005								Rela	Irf1	0.972867
Hspd1	0.493865	Predicted	0								Btk	Irf2	0.953499
Alb	0.492138	Predicted	0								Gtf2b	Irf2	0.1137
Fcgrt	0.492136	Late	0.006								Hmgb1	Irf2	1
Vcam1	0.490742	Predicted	0.0074								Irf8	Irf2	1.06822
Lsr	0.485234	Late	0.0018								Hsp90aa1	Irf3	0.729736
Rarg	0.485234	Intermediate	0.0002								Il12rb1	Irf3	0.987523
Sla	0.458166	Late	0.0056								Traf6	Irf4	1
H2afv	0.456822	Late	0.0054								Il10	Irf5	3.71722
H2afv-Hist1h2ba	0.456822	Predicted	0.001								Il12a	Irf5	1.49446
Hdac6	0.456822	Predicted	0								Il12b	Irf5	1
H2-T22	0.454011	Late	0.0094								Il23a	Irf5	1
Epb4.1	0.446304	Predicted	0								Tank	Irf7	0.412303
Macrod1	0.446304	Late	0.0044								Ptpn11	Irf8	0.235111
Itgb2l-Itgam	0.443516	Predicted	0.0008								Ptpn6	Irf8	0.81792
Icam2	0.443513	Predicted	0.0002								Zbtb17	Irf8	0.015186
Irf7	0.412303	Late	0.008								Pik3cd	Irs2	0.764531
Btbd2	0.402164	Intermediate	0.0002								Socs1	Irs3	1.29971
Clstn1	0.392275	Predicted	0.0006								Socs1	Irs4	1.29971
App	0.392274	Predicted	0								Uba7	Isg15	0.163321
G3bp1	0.375939	Intermediate	0.0002								Cxcr4	Itch	1.15423
Tlr1	0.362048	Predicted	0.0006								Tax1bp1	Itch	0.524196
Tlr2-Tlr6	0.362048	Predicted	0.0096								Thbs1	Itga3	1.76874
Rab8b	0.353155	Intermediate	0								Thbs1	Itga5	1.68222
Mxd4	0.348714	Late	0.003								Thbs1	Itgav	1.0829
Sin3a	0.348714	Predicted	0								Ptk2	Itgb2	1
Notch1	0.345445	Predicted	0								Ptk2	Itgb2l	1
Hk2	0.317467	Intermediate	0.0016								Icam2	Itgb2l-Itgam	0.443516
Myoc	0.317464	Predicted	0.0038								Actb	Itgb5	0.895261
Pklr	0.317464	Predicted	0.0062								Actg1	Itgb5	0.062949
Vav2	0.311311	Predicted	0.0036								Actn4	Itgb5	0.044345
Cblb	0.300818	Predicted	0.0084								Itga3	Itgb5	1.01519
Clic4	0.29971	Intermediate	0.001								Itga5	Itgb5	1.01519
Cask	0.274855	Predicted	0.0004								Itgav	Itgb5	1.01519
Rras2	0.26578	Predicted	0.0148								Ltbp1	Itgb5	1.01519
Cd200	0.263105	Intermediate	0.0026								Ptk2	Itgb5	1.01519
Cd200r2	0.263105	Late	0.0028								Pxn	Itgb5	0.870831
Hcrt	0.263105	Predicted	0.0176								Hck	Itk	1.14284
Hcrtr2	0.263105	Predicted	0.0172								Pik3r5	Itk	1.29971
Npffr2	0.263105	Predicted	0.0356								Ccr9	Jak2	1.76349
Npy	0.263105	Early	0.0058								Cntfr	Jak2	2.01248
Ralb	0.255406	Predicted	0.0006								CR974586.2	Jak2	1.90961
Canx	0.248467	Predicted	0.0006								CT868723.4	Jak2	1.90961
Cul1	0.248467	Predicted	0.0002								Cxcr5	Jak2	1
Kng2	0.241577	Predicted	0.0002								Gm13305	Jak2	1.90961
Mras	0.233902	Predicted	0.0018								Gm2002	Jak2	1.90961
Fer	0.232294	Predicted	0.006								Ifnar1	Jak2	1
Pak2	0.225275	Predicted	0.0012								Ifnar2	Jak2	2.01248
Arhgap10	0.225273	Predicted	0.0114								Il10ra	Jak2	2.01248
Apoa1	0.219255	Predicted	0								Il10rb	Jak2	2.01248
Cd209g	0.175311	Predicted	0.0014								Il12rb1	Jak2	2.01248
Pag1	0.168464	Predicted	0.0002								Il13ra1	Jak2	1.90961
Isg15	0.163321	Intermediate	0.0006								Il13ra2	Jak2	1.90961
Uba7	0.163317	Predicted	0.001								Il15ra	Jak2	1.90961
Ccr5	0.159083	Predicted	0								Il20ra	Jak2	1.90961
Zbtb16	0.13871	Predicted	0.0004								Il20rb	Jak2	1.34265
Atp7b	0.138708	Predicted	0.0008								Il22ra1	Jak2	2.01248
Ifngr1-Ifngr2	0.13542	Predicted	0.0016								Il22ra2	Jak2	1.90961
Phb2	0.13313	Predicted	0								Il28ra	Jak2	1.90961
Creb3	0.129029	Predicted	0.0058								Il2ra	Jak2	1.90961
Pla2g10	0.128052	Predicted	0.015								Il2rb	Jak2	1
Pla2r1	0.128052	Predicted	0.0108								Il6ra	Jak2	2.01248
Fpr3	0.12234	Predicted	0								Il7r	Jak2	2.01248
Abca1	0.113698	Intermediate	0.0004								Il9r	Jak2	2.01248
Gtf2b	0.113698	Early	0.0002								Lifr	Jak2	1.90961
Mcm2	0.113698	Predicted	0.0046								Socs2	Jak2	0.893363
Pdzk1	0.113698	Predicted	0.002								Socs5	Jak2	0.249022
Slk	0.113698	Predicted	0.0194								Socs7	Jak2	0.159665
Alpi	0.105557	Predicted	0.0016								Xcr1	Jak2	1.33123
Gpld1	0.105557	Predicted	0.0002								Ccr2	Jak3	1.14761
Esr2	0.0804441	Predicted	0								Ifngr1	Jak3	1.03989
Ptpn23	0.0804441	Intermediate	0.0004								Il21r	Jak3	1.17761
Rras	0.0790484	Predicted	0								Arrb1	Jun	0.897358
Zhx2	0.0790484	Intermediate	0.001								Bcl3	Jun	0.919473
Cbl	0.067416	Predicted	0.0008								Hif1a	Jun	0.979448
Fnbp1	0.067416	Predicted	0.0372								Hsp90aa1	Jun	0.982246
Sirpa	0.0615007	Predicted	0.0004								Mafb	Jun	0.957883
Fgr	0.0519669	Predicted	0.0006								Nfe2l2	Jun	0.356343
Dok2	0.0514311	Intermediate	0								Nras	Jun	0.700146
Mmp8	0.0480917	Predicted	0.0006								Top1	Jun	1.02251
Umod	0.0480917	Predicted	0.0012								Mapk6	Junb	0.933791
Csnk2a2	0.0400417	Predicted	0.0008								Ddit3	Jund	0.606089
											Fosb	Jun-Fosb	1
											Jun	Jun-Fosb	1
											Ctnnd1	Jup	0.256332
											Fer	Jup	0.232294
											Rab8b	Jup	0.353155
											Pgf	Kdr	0.408911
											Shc2	Kdr	0.678433
											Inpp5d	Kit	0.115753
											Jak2	Kit	0.20233
											Tec	Kit	0.981625
											Kng2	Klk1b11	0.241577
											Serpina5	Klk1b11	0.606089
											Capn1	Kng2	0.241577
											Met	Kras	1.67843
											Pik3r5	Kras	1.29971
											Rps6ka2	Kras	1.20895
											Fas	Lck	0.988771
											Cebpb	Lcn2	1
											Rela	Lcn2	0.972867
											Fas	Lgals1	0.56458
											Socs1	Lifr	1.90961
											Dpt	Lox	1
											Fbn1	Lox	0.539894
											Actg1	Lsp1	0.849931
											Rarg	Lsr	0.485234
											Tnfrsf14	Lta	0.843092
											Tnfrsf1a	Lta	1
											Thbs1	Ltbp1	1.55508
											Stat1	Ly6a	0.231815
											Stat3	Ly6a	0.521469
											Tec	Lyn	0.981625
											Epb4.1	Macrod1	0.446304
											Ikbke	Mafb	0.95788
											Tnfaip3	Malt1	0.875975
											Cdc42	Map3k1	1
											Hsp90aa1	Map3k1	0.982246
											Rac2	Map3k1	0.243027
											Cd40	Map3k14	1.71726
											Irak2	Map3k14	1.00338
											Irak3	Map3k14	1.36644
											Jak2	Map3k5	1.25354
											Birc3	Map3k7	1
											Hsp90aa1	Map3k7	0.225273
											Tnf	Map3k7	1
											Dusp1	Mapk1	0.409405
											Hsp90aa1	Mapk1	0.982246
											Mknk2	Mapk1	1.00539
											Ppp2cb	Mapk1	1
											Ppp2r1b	Mapk1	1
											Tnfsf11	Mapk1	0.827687
											Hspa1l	Mapk10	1.63056
											Rap1b	Mapk10	1.26916
											Traf1	Mapk10	1.56417
											Ccnd1	Mapk11	1
											Dusp1	Mapk11	1
											Gnai3	Mapk11	0.86627
											Kras	Mapk11	1
											Nras	Mapk11	0.413154
											Dusp1	Mapk12	1
											Dusp16	Mapk12	1.72579
											Gnai3	Mapk12	0.86627
											Gtf2i	Mapk12	0.433995
											Kras	Mapk12	0.253364
											Dusp1	Mapk13	1
											Dusp16	Mapk13	1.72579
											Gnai3	Mapk13	0.584501
											Nras	Mapk13	0.969128
											Htra2	Mapk14	0.856981
											Mapkapk2	Mapk14	1.3479
											Tollip	Mapk14	0.412302
											Dusp16	Mapk3	1.72579
											Hif1a	Mapk3	0.979448
											Hsp90aa1	Mapk3	0.982246
											Ppp2cb	Mapk3	1
											Ppp2r1b	Mapk3	1
											Ptprj	Mapk3	0.515426
											Actg1	Mapk6	0.118568
											Gpx1	Mapk6	0.933794
											Mdk	Mapk6	0.815223
											Plk1	Mapk6	0.933791
											Ppp2r1a	Mapk6	0.933791
											Mef2a	Mapk7	0.95566
											Myc	Mapk7	0.0559529
											Prkca	Mapk7	0.197342
											Fas	Mapk8	0.988771
											Hspa1l	Mapk8	1.63056
											Rap1b	Mapk8	1.26916
											Traf1	Mapk8	1.56417
											Hspa1l	Mapk9	1.63056
											Rap1b	Mapk9	1.26916
											Traf1	Mapk9	1.56417
											Mapk11	Mapkapk2	2.05415
											Mapk12	Mapkapk2	2.05415
											Mapk13	Mapkapk2	2.05415
											Casp1	Mapt	0.765667
											Prkcd	Marcks	1.19791
											Prkce	Marcks	1
											Prkcd	Marcksl1	1.45102
											Scgb3a1	Marco	1
											Scgb3a2	Marco	1
											Ikbke	Mavs	1.00483
											Tank	Mavs	0.344915
											Ccnb2	Mcm2	0.113698
											Sdc1	Mdk	0.815223
											Ezr	Mdm2	1.03144
											Hsp90aa1	Mdm2	0.646989
											Actn4	Mef2a	0.95566
											Cdk5	Mef2a	0.399829
											Phb2	Mef2a	0.133127
											Casp4	Mefv	1.48026
											Cblb	Met	0.300818
											Cblc	Met	1.67843
											Egf	Met	1
											Fgf1	Met	1
											Fgf2	Met	1.67843
											Figf	Met	1.67843
											Itch	Met	1.67843
											Mdm2	Met	1.67843
											Mitf	Met	1.67843
											Nedd4	Met	1.67843
											Nedd4l	Met	1.67843
											Pgf	Met	1.67843
											Smurf1	Met	1.67843
											Smurf2	Met	1.67843
											Traf6	Met	1.67843
											Vegfa	Met	1.67843
											Vegfb	Met	1.67843
											Vegfc	Met	1.67843
											Wwp1	Met	0.748634
											Creb3	Mitf	0.129029
											Creb3l3	Mitf	1
											Gsk3b	Mitf	0.549404
											Esr2	Mknk2	0.027204
											Mapk3	Mknk2	0.978186
											Runx2	Mmp13	1
											Mmp2	Mmp14	0.0480917
											Prkca	Mmp14	0.935575
											Acan	Mmp19	1
											Il1b	Mmp2	1
											Umod	Mmp8	0.0480917
											Pik3ca	Mras	0.233902
											Rhob	Mtap1a	1
											Pik3r5	Mtor	1.29971
											Sin3a	Mxd4	0.348714
											Stat5a	Myc	1.19955
											Arl1	Myd88	0.926137
											Bcl2	Myd88	1
											Fadd	Myd88	1
											Hsp90aa1	Myd88	0.982246
											Irak1	Myd88	1
											Irak2	Myd88	1.00338
											Myd88-Tollip-Tirap	Myd88	1
											Pik3r1	Myd88	1
											Stap2	Myd88	1
											Syk	Myd88	1
											Tirap	Myd88	1
											Tlr1	Myd88	0.362048
											Tlr2-Tlr1	Myd88	1
											Tlr2-Tlr6	Myd88	0.362048
											Tlr3	Myd88	0.805107
											Tlr6	Myd88	1
											Tlr7	Myd88	1
											Tlr9	Myd88	1
											Traf3	Myd88	1
											Tuba1a	Myd88	1
											Tlr2	Myd88-Tollip-Tirap	2.2167
											Pklr	Myoc	0.317464
											Jak2	Nck1	1.31119
											Nfkbib	Ncor2	1.27757
											Il1a	Ndn	1
											Casp1	Nedd4	1
											Fes	Nedd4	0.515116
											Isg15	Nedd4	0.163321
											Rnf11	Nedd4l	0.729377
											Tollip	Nedd4l	0.949056
											Eif2ak1	Nfe2l2	1.24847
											Eif2ak2	Nfe2l2	1.24847
											Eif2ak4	Nfe2l2	1.20911
											Ncor2	Nfe2l2	0.395696
											Akt1	Nfkb1	2.22527
											Akt2	Nfkb1	2.22527
											Akt3	Nfkb1	2.22527
											Card9-Malt1-Bcl10	Nfkb1	2.22527
											Hspb1	Nfkb1	2.22527
											Ikbkb-Chuk-Ikbkg	Nfkb1	2.22527
											Il1r1	Nfkb1	2.22527
											Il1r2	Nfkb1	2.22527
											Jun-Fosb	Nfkb1	2
											Map3k1	Nfkb1	2.22527
											Map3k14	Nfkb1	2.22527
											Map3k7	Nfkb1	2.22527
											Mapk1	Nfkb1	2.22527
											Mapk10	Nfkb1	2.22527
											Mapk11	Nfkb1	2.22527
											Mapk12	Nfkb1	2.22527
											Mapk13	Nfkb1	2.22527
											Mapk14	Nfkb1	1.43346
											Mapk3	Nfkb1	2.22527
											Mapk8	Nfkb1	2.22527
											Mapk9	Nfkb1	2.22527
											Mavs	Nfkb1	1.34974
											Myd88	Nfkb1	2.22527
											Nfkbib	Nfkb1	0.20708
											Nfkbiz	Nfkb1	2.22527
											Pik3r2	Nfkb1	0.31923
											Pkn1	Nfkb1	2.22527
											Pkn3	Nfkb1	2.22527
											Rac1	Nfkb1	2.22527
											Rac2	Nfkb1	2.22527
											Rac3	Nfkb1	2.22527
											Raf1	Nfkb1	2.22527
											Ripk2	Nfkb1	2.22527
											Tlr2-Cd14	Nfkb1	2.2167
											Tlr4	Nfkb1	2.22527
											Traf6	Nfkb1	2.22527
											Nfkb1	Nfkb1-Rela	0.02713
											Nfkbia	Nfkb1-Rela	1
											Rela	Nfkb1-Rela	0.972867
											Bcl3	Nfkb2	0.120194
											Hsp90aa1	Nfkb2	0.982246
											Nfkbib	Nfkb2	1.99095
											Nfkbie	Nfkb2	0.947967
											Rela	Nfkb2	0.972867
											Akt1	Nfkbib	1.99095
											Akt2	Nfkbib	1.99095
											Akt3	Nfkbib	1.99095
											Eif2ak1	Nfkbib	0.942891
											Eif2ak2	Nfkbib	0.481772
											Eif2ak3	Nfkbib	1.99095
											Tab1	Nfkbib	1.99095
											Calm2	Nfkbie	0.187744
											Cul1	Nfkbie	0.248467
											Relb	Nfkbie	0.714625
											Skp1a	Nfkbie	0.0177539
											Vcp	Nfkbie	0.0205515
											Epha4	Ngef	1.50037
											Il1b	Nlrp10	1
											Il1b	Nlrp2	1
											Pycard	Nlrp3	0.982246
											Il10	Nos2	4.11568
											Tlr2	Nos2	2.2167
											Xiap	Notch1	0.345445
											Npy	Npffr2	0.263105
											Atf4	Npy	0.263105
											Gtf2i	Nr4a2	0.0648223
											Rela	Nr4a2	0.972867
											Sfpq	Nr4a2	0.497753
											Met	Nras	1.67843
											Pik3r5	Nras	1.29971
											Rps6ka2	Nras	1.20895
											Shc2	Ntrk1	1
											Htra2	Pag1	0.168464
											Hck	Pak2	0.225275
											Hif1a	Pdgfb	0.784972
											Pik3r5	Pdpk1	1.29971
											Slk	Pdzk1	0.113698
											Srgn	Pf4	0.863212
											Nfkb1	Pgf	2.22527
											Cxcr4	Phb2	0.13313
											Casp8	Pias1	0.199555
											Dnm1	Pias1	1
											Gtf2i	Pias2	0.184369
											Itgb5	Pias2	1.01519
											Pik3ca	Pik3ap1	1.04377
											Pik3cb	Pik3ap1	0.112238
											Pik3cg	Pik3ap1	0.931528
											Pik3r3	Pik3ap1	1.04377
											Jak2	Pik3ca	2.01248
											Met	Pik3ca	1.67843
											Traf1	Pik3ca	1.56417
											Jak2	Pik3cb	2.01248
											Met	Pik3cb	1.67843
											Traf1	Pik3cb	1.56417
											Jak2	Pik3cd	1.3885
											Met	Pik3cd	1.22148
											Jak2	Pik3cg	2.01248
											Met	Pik3cg	1.67843
											Traf1	Pik3cg	1.21833
											Ccr2	Pik3r1	1.14761
											Pik3ap1	Pik3r1	1.04377
											Traf1	Pik3r1	1.56417
											Jak2	Pik3r2	1.26308
											Met	Pik3r2	1.09606
											Jak2	Pik3r3	2.01248
											Met	Pik3r3	1.67843
											Traf1	Pik3r3	0.334488
											Cd28	Pik3r5	1.21048
											Crk	Pik3r5	1.01519
											Csf2rb2	Pik3r5	1.29971
											Egfr	Pik3r5	0.722702
											Erbb2	Pik3r5	1.29971
											Erbb4-Erbb4	Pik3r5	1
											Fgfr1	Pik3r5	0.541834
											Fgr	Pik3r5	0.0519669
											Flt4	Pik3r5	0.937767
											Fyn	Pik3r5	1.29971
											Gnai1	Pik3r5	1.00477
											Gnai2	Pik3r5	0.00476935
											Hck	Pik3r5	1.22127
											Il3ra	Pik3r5	1.29971
											Irs2	Pik3r5	0.764531
											Irs3	Pik3r5	1.29971
											Irs4	Pik3r5	1.29971
											Jak2	Pik3r5	1.65609
											Jak3	Pik3r5	1.29971
											Kdr	Pik3r5	1.08734
											Kit	Pik3r5	1.29971
											Lck	Pik3r5	0.988771
											Lyn	Pik3r5	0.981625
											Met	Pik3r5	1.48907
											Mras	Pik3r5	0.233902
											Ntrk1	Pik3r5	1
											Rras	Pik3r5	0.0790484
											Syk	Pik3r5	1.29971
											Tlr3	Pik3r5	0.15908
											Traf3	Pik3r5	1.22527
											Tyk2	Pik3r5	1.29971
											Vcam1	Pik3r5	0.490742
											Zap70	Pik3r5	1
											Ptpn11	Pilra	0.144834
											Ptpn6	Pilra	0.831371
											Ptpn11	Pilrb1	0.347716
											Ptpn6	Pilrb1	0.831371
											Ptpn6	Pilrb2	0.694053
											Stat5a	Pim1	1.19955
											Stat3	Pim2	0.317282
											Stat5b	Pim2	1.27505
											Becn1	Pink1	0.498433
											Hk2	Pklr	0.317464
											Cd44	Pkn1	0.0273649
											Cdc25c	Pkn1	1
											Marcks	Pkn1	1.19791
											Arhgap10	Pkn3	0.225273
											Arhgap26	Pkn3	1
											Pld1	Pkn3	1
											Gnas	Pla2g10	0.128052
											Gnas	Pla2g4a	1
											Gnas	Pla2g4b	0.53874
											Pla2g10	Pla2r1	0.128052
											Jund	Plau	0.606089
											Icam1	Plcg1	2.17531
											Icam1	Plcg2	2.17531
											Rala	Pld1	0.645603
											Rhoa	Pld1	0.354397
											Src	Pld2	0.85231
											Flnb	Plekho1	0.858188
											Ccnb3	Plk1	1
											Cdk1-Ccnb2	Plk1	1
											Pld2	Ppap2a	0.85231
											Ccr2	Ppbp	1
											Prex1	Ppp1ca	1
											Tnf	Ppp1ca	1
											Akt1	Ppp1cb	1.20911
											Akt2	Ppp1cb	1.20911
											Akt3	Ppp1cb	1.20911
											Ccnd1	Ppp1cb	1.20911
											Ccnd3	Ppp1cb	1.01109
											Ppp1r14a	Ppp1cb	1.20911
											Ppp1r1a	Ppp1cb	1.20911
											Ppp1r1b	Ppp1cb	1.20911
											Prkg1	Ppp1cb	1.20911
											Ptk2	Ppp1cb	0.232438
											Rock1	Ppp1cb	1.20911
											Rock2	Ppp1cb	1.20911
											Prkca	Ppp1r14a	0.882269
											Prkcz	Ppp1r14a	0.326842
											Ppp3cb	Ppp1r1a	0.90703
											Prkaca	Ppp1r1a	0.302082
											Cdk5	Ppp1r1b	0.631614
											Ppp1ca	Ppp1r1b	0.577497
											Nfkb1	Ppp2ca	2.22527
											Nfkb1	Ppp2cb	2.22527
											Nfkb1	Ppp2r1a	2.22527
											Nfkb1	Ppp2r1b	2.22527
											Nfkb1	Ppp2r2a	2.22527
											Nfkb1	Ppp2r2b	2.22527
											Nfkb1	Ppp2r2c	2.22527
											Nfkb1	Ppp2r2d	2.22527
											Socs3	Ppp3cb	0.90703
											Hist2h3b	Prdm1	0.725795
											Irf4	Prdm1	1
											Pik3r5	Prex1	1.29971
											Adcy5	Prkaca	1
											Adcy2	Prkacb	1
											Adcy5	Prkacb	1
											Adcy5	Prkca	1
											Itgb5	Prkca	1.01519
											Itgb5	Prkcb	1.01519
											Ppp2cb	Prkcb	0.0162578
											Inpp5d	Prkcd	0.648931
											Pik3ca	Prkcd	1
											Pik3cb	Prkcd	1
											Pik3cb	Prkce	1
											Itgb5	Prkcg	1.01519
											Ppp2r1b	Prkcg	0.0162578
											Pik3r5	Prkci	1.29971
											Adcy5	Prkcz	1
											Pik3r5	Prkcz	1.29971
											Gtf2i	Prkg1	0.646105
											Vasp	Prkg1	0.563007
											Adcy5	Prkx	0.498552
											Jak2	Prmt5	1.19158
											Il1b	Prtn3	1
											Ikbke	Psme2	0.864969
											Arrb1	Ptafr	0.897358
											Atf2	Ptgs2	1.20911
											Fcgr3	Ptgs2	1.00431
											Irf1	Ptgs2	0.0632525
											Nfkb2	Ptgs2	3.45005
											Smad4	Ptgs2	1.0043
											Yy1	Ptgs2	2.52944
											Hck	Ptk2	1.14284
											Met	Ptk2	1.67843
											Pik3r5	Ptk2	1.29971
											Cxcr4	Ptk2b	1.31182
											Capn1	Ptpn1	0.090894
											Jak2	Ptpn1	2.01248
											Sirpb1a	Ptpn11	0.727661
											Tec	Ptpn18	0.676377
											Grb2	Ptpn23	0.0804441
											Cav1	Ptpn6	1.39245
											Ctnnd1	Ptpn6	0.542804
											Cxcr4	Ptpn6	1.0716
											Jak2	Ptpn6	1.42192
											Jak2	Ptprc	0.16122
											Tec	Ptprc	0.981625
											Jak2	Ptprj	1.44453
											Sdc4	Pxn	1.22399
											Mefv	Pycard	1.48027
											Calm1	Pygl	1.11258
											Calm3	Pygl	1.11258
											Pxn	Rab8b	0.353155
											Il18rap	Rac1	0.71084
											Pik3r5	Rac1	1.29971
											Ralgds	Rac1	1.81963
											Ngef	Rac2	0.00623981
											Pik3r5	Rac2	1.29971
											Prex1	Rac2	0.29971
											Ralgds	Rac2	1.83551
											Ngef	Rac3	0.494132
											Pik3r5	Rac3	1.29971
											Ralgds	Rac3	1.4043
											Jak2	Raf1	0.95612
											Rap1b	Raf1	1.26916
											Ralgds	Rala	0.645603
											Ralgds	Ralb	0.255406
											Arrb1	Ralgds	1.36643
											Arrb2	Ralgds	0.60554
											Hras1	Ralgds	1.83551
											Kras	Ralgds	1.83551
											Nras	Ralgds	1.83551
											Pdpk1	Ralgds	0.31747
											Hras1	Rap1b	1.26916
											Prkacb	Rap1b	1.26916
											Prkx	Rap1b	0.498552
											Rapgef3	Rap1b	1.26578
											Rasgrp2	Rap1b	1.26916
											Rgs2	Rap1b	1.49022
											Mtap1a	Rapgef3	1
											Rras2	Rapgef3	0.26578
											Src	Rarg	0.485234
											Epha4	Rasa1	1.50037
											Kras	Rasgrp2	1
											Nras	Rasgrp2	0.269161
											Il6	Rel	1.37534
											Akt2	Rela	0.63891
											Akt3	Rela	0.0186301
											Chuk	Rela	0.972867
											Ikbkb	Rela	0.972867
											Ikbkg	Rela	0.972867
											Il1r2	Rela	0.774727
											Map3k14	Rela	0.701943
											Mapk8	Rela	0.270374
											Nfkbia	Rela	0.972867
											Nfkbib	Rela	1.48191
											Nfkbiz	Rela	0.972867
											Prkcz	Rela	0.972867
											Rac1	Rela	0.972867
											Rac2	Rela	0.972867
											Rac3	Rela	0.972867
											Relb	Rela	1.06636
											Cdk1	Relb	0.373582
											Ikbkb	Relb	1.15986
											Ikbkg	Relb	1.15986
											Map3k14	Relb	1.15986
											Smarcc1	Relb	1.15986
											Relb	Relb-Nfkb2	1.15986
											Adcy5	Rgs2	1.71127
											Icam1	Rhoa	2.17531
											Ralgds	Rhoa	1.83551
											Rap1b	Rhoa	0.0159376
											Ngef	Rhob	1
											Fas	Ripk1	0.740377
											Ezr	Ripk2	1.03144
											Hsp90aa1	Ripk2	0.925302
											Tnfaip3	Ripk2	0.268527
											Pygl	Ripk3	1.11258
											Stam2	Rnf11	0.640569
											Tnfaip3	Rnf11	0.837443
											Arrb1	Rock1	0.177668
											Ezr	Rock1	1.03144
											4930544G11Rik	Rock2	1
											Ikbke	Rock2	0.20911
											Igf1	Rps6ka2	1.20895
											Ins1	Rps6ka2	1.20895
											Ins2	Rps6ka2	1.20895
											Mapk7	Rps6ka2	1.20895
											Zhx2	Rras	0.0790484
											Araf	Rras2	0.26578
											Ccnb1	Runx2	1
											Src	Runx3	0.897231
											Il1a	S100a13	1
											Arrb1	S100a9	0.897358
											Egfr	S100a9	0.444466
											Tfcp2	Saa3	1
											Nfe2l2	Sars2	1.24847
											Smad7	Sash3	1
											Smurf1	Sash3	0.0043
											Zfp263	Scand1	0.627776
											Sfpi1	Scgb3a1	1
											Cebpa	Scgb3a2	1
											Cxcl1	Sdc1	4.35097
											Thbs1	Sdc2	1.03144
											Thbs1	Sdc3	0.739541
											Col2a1	Sdc4	0.677145
											Tnxb	Sdc4	0.54684
											Ezr	Sell	1.03144
											Ezr	Selplg	0.953525
											Egfr	Sepp1	0.821603
											Plau	Serpina5	0.606085
											Cdc42	Sfpi1	1
											Fus	Sfpi1	0.935577
											Il12rb1	Sfpi1	1
											Vav1	Sfpi1	0.146929
											Nfkbib	Sfpq	1.44805
											Prkci	Sfpq	0.317464
											Relb	Sfpq	1.0325
											Smarca2	Sfpq	0.590257
											Pla2g4b	Shbg	0.53874
											Hck	Shc1	1.14284
											Met	Shc2	1.67843
											Met	Shc3	1.67843
											Met	Shc4	1.67843
											Ptpn6	Siglece	0.392449
											Traf4	Siglece	1
											Hsp90aa1	Sin3a	0.348714
											Tyrobp	Sirpa	0.0615007
											Jak2	Sirpb1a	1.47522
											Tyrobp	Sirpb1a	0.937956
											Sars2	Skp1a	1
											Fgfr1	Sla	0.458166
											Pik3r5	Slc2a4	1.29971
											Abcc2	Slc9a3r1	1
											Cdk1-Ccnb2	Slk	0.113698
											Ctsb	Slpi	0.595075
											Elane	Slpi	1
											Sash3	Smad4	1.0043
											Tnf	Smad7	1
											Sod2	Smarca2	1.66083
											Ets2	Smarcc1	2.99946
											Irak2	Smurf1	0.241619
											Plekho1	Smurf1	0.493816
											Traf4	Smurf1	0.947294
											Rhoa	Smurf2	0.781202
											Runx3	Smurf2	0.897231
											Axl	Socs1	0.74066
											Cxcr4	Socs1	1.61072
											Gfi1b	Socs1	1.90961
											Grb2	Socs1	1.90961
											Ifngr1	Socs1	1.47475
											Irf1	Socs1	1.90961
											Itk	Socs1	1.90961
											Jak2	Socs1	1.96105
											Jak3	Socs1	1.90961
											Map3k5	Socs1	1.20211
											Nck1	Socs1	1.25976
											Pag1	Socs1	0.16846
											Pik3r1	Socs1	1.90961
											Pik3r2	Socs1	1.21165
											Pim1	Socs1	1.19955
											Pim2	Socs1	1.59233
											Rasa1	Socs1	1.50037
											Rela	Socs1	1.44124
											Stat1	Socs1	1.90961
											Stat2	Socs1	1.90961
											Stat3	Socs1	1.90961
											Stat4	Socs1	1.90961
											Stat5a	Socs1	1.55458
											Stat5b	Socs1	1.90961
											Stat6	Socs1	1.90961
											Tec	Socs1	1.44562
											Tyk2	Socs1	1.63752
											Vav1	Socs1	0.944165
											Vav2	Socs1	0.31131
											Socs3	Socs2	0.305378
											Stat5a	Socs2	1.19955
											Nfkb1	Socs3	2.22527
											Stat5a	Socs4	1.19955
											Stat5a	Socs5	1.19955
											Stat5a	Socs7	1.19955
											Egr1	Sod2	1.66083
											Ccnd1	Sp1	1
											Cdk2	Sp1	1
											Ddx5	Sp1	0.05929
											Esr2	Sp1	0.0532386
											Hif1a	Sp1	0.979448
											Hsp90aa1	Sp1	0.982246
											Prkcz	Sp1	1
											Rela	Sp1	0.972867
											Sfpq	Sp1	0.905149
											Shc1	Sp1	1
											Src	Sp1	0.879298
											Zbtb17	Sp1	1
											Csnk2a2	Sp3	0.0400417
											Grin1	Sp3	1
											Sfpq	Sp3	0.905149
											Sumo1	Sp3	0.988771
											Ube2i	Sp3	1
											Adrb2	Src	0.102642
											Cav1	Src	1.41641
											Ctnnd1	Src	0.879298
											Dnm2	Src	0.879298
											Gab2	Src	0.173078
											Itk	Src	0.532933
											Jak2	Src	1.44589
											Met	Src	1.27887
											Nos2	Src	0.879298
											Plcg1	Src	0.223925
											Ptk2b	Src	0.879298
											Smarcc1	Src	0.879298
											Txk	Src	0.879298
											Casp8	Srf	0.88944
											Src	Srf	0.879298
											Ccl3	Srgn	2.58561
											Jak2	Stam2	0.640573
											Jak2	Stap2	1
											Cxcr4	Stat1	1.31182
											Ppp2r2a	Stat1	1
											Ppp2r2c	Stat1	1
											Ppp2r2d	Stat1	0.225273
											Cxcr4	Stat2	0.815765
											Ppp2r2a	Stat2	0.868576
											Ppp2r2c	Stat2	0.225273
											Ccr2	Stat3	1.14761
											Cxcr4	Stat3	1.28193
											Il23r	Stat3	1
											Nfkbiz	Stat3	1
											Ptk2b	Stat3	0.432524
											Socs3	Stat3	1
											Jak2	Stat4	2.01248
											Abl1	Stat5a	1.19955
											Bcr	Stat5a	1.19955
											Cish	Stat5a	1
											Egfr-Egfr	Stat5a	1
											Erbb4	Stat5a	0.854207
											Flt3	Stat5a	1.19955
											Jak2	Stat5a	1.60602
											Ncor2	Stat5a	0.881877
											Pias1	Stat5a	1.19955
											Pias2	Stat5a	1.19955
											Ppp2ca	Stat5a	0.229867
											Cxcr4	Stat5b	1.17219
											Jak2	Stat5b	2.01248
											Jak2	Stat6	2.01248
											Fas	Sumo1	0.988771
											Pik3ap1	Syk	1.04377
											Sirpb1a	Syk	0.937956
											Tyrobp	Syk	1
											Cd14	Tab1	2.08251
											Cd40	Tab2	0.997495
											Birc2	Tank	1.07543
											Casp8	Tank	0.116064
											Plk1	Tank	1.06621
											Tnfaip3	Tax1bp1	0.922025
											Gna12	Tec	0.981625
											Jak2	Tec	1.49705
											Pik3r1	Tec	0.845936
											Pik3r3	Tec	0.981625
											Plcg1	Tec	0.981625
											Plcg2	Tec	0.981625
											Ptprj	Tec	0.929107
											Rhoa	Tec	0.981625
											Shc1	Tec	0.142838
											Ddx5	Tfcp2	0.999998
											A2m	Tgfbi	1
											Col1a1	Tgfbi	0.518225
											Col2a1	Tgfbi	0.322855
											Egr1	Thbs1	1.76874
											Pdgfb	Thbs1	0.784975
											Sp1	Thbs1	1.76874
											Srf	Thbs1	1.76874
											Trp53	Thbs1	1.76874
											Casp1	Tirap	0.732353
											Myd88-Tollip-Tirap	Tirap	0.267647
											Tlr2-Tlr1	Tlr1	0.362048
											Ets2	Tlr13	1
											Marcksl1	Tlr2	1.45103
											Rela	Tlr2	1.59479
											Sp1	Tlr2	2.2167
											Sp3	Tlr2	2.2167
											Tlr2	Tlr2-Cd14	2.2167
											Hspa9	Tlr2-Tlr1	1.36205
											Tlr6	Tlr2-Tlr6	0.362048
											Irf2	Tlr3	0.964187
											Birc3	Tlr4	0.152961
											Hspa9	Tlr4	1.36205
											Irak2	Tlr4	0.710263
											Hspa9	Tlr6	1.36205
											Unc93b1	Tlr7	1
											Irf2	Tlr9	1
											Nfkb1	Tnf	2.22527
											Irf2	Tnfrsf14	0.843092
											Fas	Tnfrsf1a	0.988771
											Jak2	Tnfrsf1a	0.01123
											Lta	Tnfrsf1b	1.84309
											Traf2	Tnfrsf1b	1.13477
											Stat5a	Tnfsf11	0.827687
											Vegfb	Tnxb	0.54684
											Birc2	Tollip	0.949056
											Cav1	Tollip	1.15639
											Myd88-Tollip-Tirap	Tollip	0.949056
											Casp6	Top1	0.778944
											Myc	Top1	0.217461
											Ube2i	Top1	0.428261
											Casp3	Traf1	1.06669
											Cd40	Traf1	0.766201
											Hsp90aa1	Traf1	1.27321
											Map3k5	Traf1	0.051427
											Nfkb1	Traf1	1.89472
											Nfkb2	Traf1	1.56417
											Rela	Traf1	1.26852
											Sfpq	Traf1	1.08022
											Src	Traf1	1.22173
											Tank	Traf1	1.3198
											Tnfsf9	Traf1	1.56417
											Traf2	Traf1	0.995305
											Cav1	Traf2	1.18998
											Cd40	Traf2	1.07185
											Ikbke	Traf2	0.844415
											Nfkb1	Traf2	1.32586
											Nfkb1	Traf3	2.22527
											Nfkb1	Traf4	2.22527
											Atp6v1e1	Traf6	0.988007
											Ezr	Traf6	1.03144
											Jak2	Traf6	2.01248
											Marcks	Traf6	0.19597
											Tax1bp1	Traf6	0.397828
											Traf4	Traf6	0.277979
											Capn1	Trp53	0.149304
											Hif1a	Trp53	0.0656917
											Hsp90aa1	Trp53	0.102625
											Ndn	Trp53	0.0205515
											Nfkb1	Trp53	2.22527
											Ppp2r2b	Trp53	1
											Smarcc1	Trp53	0.337366
											Tec	Trp53	0.981625
											Htra2	Tuba1a	0.999998
											Pik3r5	Txk	1.29971
											Ifngr1	Tyk2	1.03989
											Il12rb2	Tyk2	0.71973
											Il21r	Tyk2	1.17761
											Ets2	Tyrobp	2.99946
											Fas	Uba7	0.163317
											Birc7	Ube2i	1
											Fas	Ube2i	0.428265
											Il1b	Umod	0.0480917
											Tlr13	Unc93b1	1
											Itga5	Vasp	0.667037
											Tec	Vav1	0.981625
											Txk	Vav1	0.109474
											Tec	Vav2	0.311311
											Tnf	Vcam1	0.490742
											Nos2	Vcp	1
											Nfkb1	Vegfa	2.22527
											Nfkb1	Vegfb	2.22527
											Nfkb1	Vegfc	2.22527
											Rnf11	Wwp1	0.748634
											Ccl2	Xcr1	1.29074
											Ccl5	Xcr1	0.0404959
											Nfkb1	Xiap	2.22527
											Arrb1	Yy1	0.897358
											Cxcr4	Yy1	1.31182
											Mtor	Yy1	0.320261
											Tyrobp	Zap70	1
											Ripk1	Zbp1	0.740377
											Ripk3	Zbp1	1
											Il6	Zbtb16	0.13871
											Itgb5	Zbtb17	1.01519
											Dvl2	Zfp263	0.627776
											Hras1	Zhx2	0.0790484
