# Supplementary material for: Linking Transcriptional Changes over Time in Stimulated Dendritic Cells to Identify Gene Networks Activated during the Innate Immune Response
Source: PLoS Comput Biol. 2013 Nov 7;9(11):e1003323. doi: 10.1371/journal.pcbi.1003323 (PMC3820512; doi:10.1371/journal.pcbi.1003323)
Supplement: Table S12 — KEGG pathways enriched in genes identified exclusively in the network predicted for the TRIF-knockout dendritic cells. (XLSX) [file pcbi.1003323.s020.xlsx]

## Sheet: TRIFKO_unique_candidates_enrich
Supporting Table S12. KEGG pathways enriched in genes identified exclusively in the network predicted for the TRIF knockout sample
Category	Term	Count	%	PValue	Genes	List Total	Pop Hits	Pop Total	Fold Enrichment	Bonferroni	Benjamini	FDR
KEGG_PATHWAY	mmu04060:Cytokine-cytokine receptor interaction	68	15.4545	9.39e-32	IL9R, PDGFB, GM2002, IL18, IL28RA, IL21R, IL15, IL10, ACVR1B, CXCR5, IL1RAP, IFNG, IL15RA, IL1B, FAS, IL13RA1, XCR1, IFNGR2, LTA, IL1A, IL18RAP, LIFR, TNFRSF14, CD40, IFNAR1, CCR9, VEGFB, VEGFC, INHBA, IFNAR2, CCR5, PPBP, IL20RB, GM13305, IL20RA, CCR2, VEGFA, IL12A, IL12B, CSF3, CXCL1, IL1R2, CCL3, IL1R1, IL22RA1, CCL2, CSF2RB2, CXCL2, CNTFR, PF4, CCL5, IL12RB2, TNFRSF1A, TNFRSF1B, IL12RB1, IL23A…	305	244	5738	5.243	1.13e-29	1.13e-29	1.08e-28
KEGG_PATHWAY	mmu04630:Jak-STAT signaling pathway	40	9.09091	1.95e-17	CSF3, IL22RA1, IL9R, CSF2RB2, GM2002, STAM2, IL21R, IL28RA, CNTFR, IL15, IL10, IL12RB2, STAT4, IL12RB1, IL23A, IL10RB, IL10RA, IFNG, IL15RA, IL2RG, IL13RA1, IFNGR2, IL13RA2, IL6, IL23R, SOCS3, LIFR, STAT1, STAT3, IFNAR1, IL6RA, TYK2, IFNAR2, CBLC, CBLB, IL20RB, IL20RA, GM13305, IL12A, IL12B, IL22RA2	305	152	5738	4.95082	2.34e-15	1.17e-15	2.23e-14
KEGG_PATHWAY	mmu04010:MAPK signaling pathway	51	11.5909	5.36e-16	PDGFB, GNA12, PRKX, FOS, ACVR1B, MAPT, RRAS, IL1B, PRKACA, PRKACB, FAS, FGF1, FGF2, IL1A, FLNB, ARRB1, RRAS2, HSPB1, MAPK7, MAP3K14, GADD45B, FGFR1, IL1R2, IL1R1, MRAS, MKNK2, ATF2, TNFRSF1A, JUND, DUSP16, RASGRP2, PPP3CB, EGF, RASA1, PLA2G10, RAF1, NR4A1, MAPK11, MAPK10, TAB1, TAB2, PLA2G4A, ATF4, MAPK12, DUSP1, RPS6KA2, MAPK13, NTRK1, RAP1B, PLA2G4B, CD14	305	265	5738	3.62064	6.66e-14	2.22e-14	6.33e-13
KEGG_PATHWAY	mmu04062:Chemokine signaling pathway	39	8.86364	8.7e-14	CXCL1, CCL3, CCL2, ADCY2, GNAI3, FGR, GNAI2, ADCY5, PREX1, CXCL2, PF4, ADRBK1, CCL5, PRKX, CXCR5, PTK2B, RASGRP2, RHOA, PRKACA, PRKACB, XCR1, SHC3, SHC2, SHC4, ROCK1, ROCK2, HCK, RAF1, VAV2, STAT1, VAV1, STAT3, CCR9, CCR5, PPBP, ARRB1, CXCL16, CCR2, RAP1B	305	182	5738	4.03138	1.04e-11	2.61e-12	9.99e-11
KEGG_PATHWAY	mmu04620:Toll-like receptor signaling pathway	28	6.36364	5.05e-13	CCL3, TOLLIP, TLR1, TLR2, TIRAP, TLR3, CCL5, TLR6, TLR7, TLR9, FOS, MYD88, IL1B, IL6, MAPK11, MAPK10, CD40, STAT1, TAB1, TAB2, IFNAR1, IFNAR2, MAPK12, IRF5, MAPK13, IL12A, IL12B, CD14	305	99	5738	5.32088	6.07e-11	1.21e-11	5.8e-10
KEGG_PATHWAY	mmu04621:NOD-like receptor signaling pathway	20	4.54545	1.77e-10	CXCL1, IL6, CCL2, XIAP, IL18, CXCL2, MAPK11, MAPK10, BIRC3, CCL5, TAB1, BIRC2, TAB2, MAPK12, MEFV, MAPK13, PYCARD, IL1B, RIPK2, CASP1	305	62	5738	6.06875	2.12e-08	3.53e-09	2.03e-07
KEGG_PATHWAY	mmu04510:Focal adhesion	35	7.95455	5.65e-10	CAV1, XIAP, PDGFB, PGF, ITGB5, COL2A1, ITGAV, RHOA, EGF, SHC3, THBS1, FIGF, SHC2, SHC4, TNXB, ROCK1, ACTN4, ROCK2, FLT4, RAF1, IGF1, ITGA3, MAPK10, VAV2, BIRC3, BIRC2, FLNB, VAV1, VASP, VEGFB, VEGFC, ITGA5, VEGFA, RAP1B, COL1A1	305	198	5738	3.32555	6.78e-08	9.69e-09	6.49e-07
KEGG_PATHWAY	mmu04912:GnRH signaling pathway	22	5	2.06e-08	PLD1, ADCY2, PLA2G10, ADCY5, RAF1, MAPK11, MAPK10, MMP14, MMP2, PRKX, ATF4, PLA2G4A, MAPK12, MAPK13, PTK2B, CALM3, PRKACA, GNAS, MAPK7, PRKACB, CAMK2A, PLA2G4B, CALM1	305	97	5738	4.26689	2.47e-06	3.09e-07	2.36e-05
KEGG_PATHWAY	mmu04914:Progesterone-mediated oocyte maturation	19	4.31818	3.1e-07	CDK1, ADCY2, GNAI3, GNAI2, ADCY5, RAF1, IGF1, MAPK11, MAPK10, PRKX, CCNB3, CCNB2, MAPK12, PLK1, MAPK13, RPS6KA2, ARAF, PRKACA, PRKACB	305	85	5738	4.20528	3.72e-05	4.14e-06	0.000356
KEGG_PATHWAY	mmu04210:Apoptosis	19	4.31818	4.49e-07	IRAK2, IL1R1, XIAP, CSF2RB2, BIRC3, BIRC2, PRKX, CAPN1, TNFRSF1A, MYD88, NTRK1, IL1RAP, PPP3CB, IL1B, PRKACA, FAS, PRKACB, MAP3K14, IL1A	305	87	5738	4.10861	5.39e-05	5.39e-06	0.000515
KEGG_PATHWAY	mmu05200:Pathways in cancer	39	8.86364	1.99e-06	FGFR1, XIAP, PDGFB, PTGS2, PGF, MITF, SFPI1, MMP2, FOS, ACVR1B, ITGAV, RHOA, FAS, NOS2, EGF, FGF1, FIGF, FGF2, CEBPA, DVL2, IL6, BCR, RAF1, IGF1, ITGA3, MAPK10, STAT1, BIRC3, BIRC2, RALGDS, STAT3, VEGFB, JUP, CBLC, VEGFC, CBLB, NTRK1, ARAF, VEGFA	305	323	5738	2.27155	0.000238	2.17e-05	0.00227894
KEGG_PATHWAY	mmu05020:Prion diseases	11	2.5	8.44e-06	C1QA, EGR1, C1QB, IL6, IL1B, PRKACA, PRKACB, CCL5, C1QC, PRKX, IL1A	305	35	5738	5.91269	0.00101225	8.44e-05	0.00968772
KEGG_PATHWAY	mmu04660:T cell receptor signaling pathway	19	4.31818	4.07e-05	BCL10, CD8A, RAF1, MALT1, MAPK11, VAV2, VAV1, IL10, FOS, CBLC, CBLB, MAPK12, MAPK13, NCK1, IFNG, PPP3CB, RHOA, MAP3K14, TEC	305	118	5738	3.02923	0.00487141	0.000376	0.0467034
KEGG_PATHWAY	mmu04670:Leukocyte transendothelial migration	19	4.31818	4.57e-05	ICAM1, GNAI3, ACTN4, GNAI2, ROCK1, ROCK2, MAPK11, VAV2, VAV1, MMP2, VASP, CYBB, EZR, MAPK12, MAPK13, PTK2B, RHOA, RAP1B, RAPGEF3	305	119	5738	3.00377	0.00546654	0.000391	0.0524232
KEGG_PATHWAY	mmu04270:Vascular smooth muscle contraction	19	4.31818	5.12e-05	ADCY2, ADORA2B, PLA2G10, ROCK1, ROCK2, ADCY5, GNA12, RAF1, PRKG1, PRKX, PLA2G4A, ARAF, RHOA, CALM3, PRKACA, GNAS, PRKACB, PLA2G4B, PPP1R14A, CALM1	305	120	5738	2.97874	0.00612511	0.00041	0.0587563
KEGG_PATHWAY	mmu05212:Pancreatic cancer	14	3.18182	8.37e-05	PLD1, PGF, RAF1, MAPK10, STAT1, RALGDS, STAT3, VEGFB, VEGFC, ACVR1B, VEGFA, ARAF, EGF, FIGF	305	72	5738	3.65811	0.00999733	0.000628	0.0960706
KEGG_PATHWAY	mmu04640:Hematopoietic cell lineage	15	3.40909	0.000111	CSF3, IL1R2, IL6, IL1R1, IL9R, CD8A, GM2002, ITGA3, IL6RA, CD44, GM13305, ITGA5, CD22, IL1B, IL1A, CD14	305	84	5738	3.35948	0.0132625	0.000785	0.127637
KEGG_PATHWAY	mmu04540:Gap junction	15	3.40909	0.000145	CDK1, ADCY2, GNAI3, GNAI2, PDGFB, ADCY5, RAF1, PRKG1, PRKX, PRKACA, GNAS, PRKACB, MAPK7, EGF, TUBA1A	305	86	5738	3.28136	0.0171937	0.000963	0.165769
KEGG_PATHWAY	mmu04722:Neurotrophin signaling pathway	19	4.31818	0.000149	IRAK2, RAF1, MAPK11, MAPK10, ATF4, MAPK12, MAPK13, RPS6KA2, NTRK1, GAB1, RHOA, CALM3, RIPK2, RAP1B, MAPK7, SHC3, CAMK2A, SHC2, CALM1, SHC4	305	130	5738	2.74961	0.017664	0.000938	0.170341
KEGG_PATHWAY	mmu04650:Natural killer cell mediated cytotoxicity	18	4.09091	0.000209	H2-K1, ICAM1, ICAM2, RAF1, VAV2, VAV1, IFNAR1, IFNAR2, PTK2B, IFNG, ARAF, PPP3CB, FAS, SHC3, IFNGR2, SHC2, SHC4, TYROBP	305	122	5738	2.77571	0.0248255	0.00125615	0.240192
KEGG_PATHWAY	mmu04916:Melanogenesis	16	3.63636	0.000217	DVL2, ADCY2, GNAI3, GNAI2, CREB3, CREB1, ADCY5, MITF, RAF1, PRKX, CALM3, PRKACA, GNAS, CREB3L3, PRKACB, CAMK2A, CALM1	305	100	5738	3.0101	0.0256676	0.00123746	0.248436
KEGG_PATHWAY	mmu04720:Long-term potentiation	13	2.95455	0.000261	RAF1, PRKX, ATF4, RPS6KA2, PPP1R1A, ARAF, PPP3CB, CALM3, PRKACA, RAP1B, PRKACB, RAPGEF3, CAMK2A, CALM1	305	70	5738	3.49386	0.0308916	0.00142529	0.299723
KEGG_PATHWAY	mmu05219:Bladder cancer	10	2.27273	0.000276	VEGFB, VEGFC, PGF, ARAF, VEGFA, RAF1, THBS1, EGF, FIGF, MMP2	305	42	5738	4.47931	0.0326026	0.00144009	0.316575
KEGG_PATHWAY	mmu04910:Insulin signaling pathway	19	4.31818	0.000318	SOCS3, HK2, MKNK2, RAF1, MAPK10, PRKX, CBLC, CBLB, PYGL, PKLR, ARAF, CALM3, PRKACA, PTPN1, PRKACB, INPP5D, SHC3, SHC2, CALM1, SHC4	305	138	5738	2.59021	0.0374948	0.00159106	0.364909
KEGG_PATHWAY	mmu04012:ErbB signaling pathway	14	3.18182	0.00059	ERBB4, RAF1, MAPK10, CBLC, CBLB, EREG, NCK1, GAB1, ARAF, SHC3, EGF, CAMK2A, SHC2, SHC4	305	87	5738	3.0274	0.068319	0.00282659	0.674657
KEGG_PATHWAY	mmu04114:Oocyte meiosis	16	3.63636	0.000997	CDK1, ADCY2, ADCY5, IGF1, SKP1A, PRKX, CCNB2, SLK, MAPK12, PLK1, RPS6KA2, PPP3CB, CALM3, PRKACA, PRKACB, CAMK2A, CALM1	305	115	5738	2.61748	0.112808	0.00459301	1.13847
KEGG_PATHWAY	mmu04360:Axon guidance	17	3.86364	0.00139776	NGEF, GNAI3, GNAI2, ROCK1, ROCK2, EFNA1, EFNA2, FES, CDK5, EPHA5, EPHA4, EPHA8, NCK1, PPP3CB, RHOA, EFNA5, RASA1	305	131	5738	2.4414	0.154518	0.00619731	1.59283
KEGG_PATHWAY	mmu04370:VEGF signaling pathway	12	2.72727	0.00200775	PLA2G4A, MAPK12, PLA2G10, PTGS2, MAPK13, VEGFA, PPP3CB, RAF1, HSPB1, MAPK11, PLA2G4B, SHC2	305	76	5738	2.97049	0.214293	0.00857629	2.28066
KEGG_PATHWAY	mmu04144:Endocytosis	22	5	0.00217451	H2-K1, PLD1, DNM1L, ERBB4, H2-M2, STAM2, ADRBK1, CBLC, ACVR1B, ADRB2, CBLB, CCR5, ARRB1, NEDD4, WWP1, NTRK1, H2-T22, SMURF2, IL2RG, ITCH, SMURF1, EGF	305	202	5738	2.04895	0.229893	0.00896732	2.46794
KEGG_PATHWAY	mmu04810:Regulation of actin cytoskeleton	23	5.22727	0.00235247	FGFR1, PDGFB, ACTN4, ROCK1, ROCK2, MRAS, GNA12, RAF1, ITGB5, ITGA3, VAV2, VAV1, EZR, ITGA5, RRAS2, ITGAV, ARAF, RHOA, RRAS, EGF, FGF1, FGF2, CD14	305	217	5738	1.99402	0.246201	0.00937673	2.66744
KEGG_PATHWAY	mmu05211:Renal cell carcinoma	11	2.5	0.00350571	VEGFB, VEGFC, PDGFB, PGF, ETS1, GAB1, ARAF, VEGFA, RAF1, RAP1B, FIGF	305	70	5738	2.95635	0.343888	0.0135023	3.95121
KEGG_PATHWAY	mmu04664:Fc epsilon RI signaling pathway	12	2.72727	0.0037005	PLA2G4A, MAPK12, GAB2, PLA2G10, MAPK13, RAF1, MAPK11, MAPK10, INPP5D, VAV2, PLA2G4B, VAV1	305	82	5738	2.75314	0.359101	0.0138064	4.16651
KEGG_PATHWAY	mmu04512:ECM-receptor interaction	12	2.72727	0.0040699	TNXB, CD44, ITGA5, ITGAV, ITGB5, COL2A1, ITGA3, COL1A1, THBS1, SDC4, SDC2, SDC3	305	83	5738	2.71997	0.386996	0.0147204	4.57361
KEGG_PATHWAY	mmu04730:Long-term depression	11	2.5	0.00431578	PLA2G4A, GNAI3, GNAI2, PLA2G10, GNA12, ARAF, RAF1, IGF1, GNAS, PRKG1, PLA2G4B	305	72	5738	2.87423	0.404893	0.0151492	4.84371
KEGG_PATHWAY	mmu04940:Type I diabetes mellitus	10	2.27273	0.00551451	H2-K1, H2-M2, IFNG, IL12A, H2-T22, IL1B, IL12B, FAS, LTA, IL1A	305	63	5738	2.98621	0.484992	0.0187806	6.15052
KEGG_PATHWAY	mmu04610:Complement and coagulation cascades	11	2.5	0.00580018	C1QA, C1QB, C1RA, A2M, KNG2, C3, CFB, SERPINA5, CFH, C1QC, PLAU	305	75	5738	2.75926	0.502444	0.0192034	6.45953
KEGG_PATHWAY	mmu05214:Glioma	10	2.27273	0.0061268	PDGFB, ARAF, RAF1, CALM3, IGF1, EGF, SHC3, CAMK2A, SHC2, SHC4, CALM1	305	64	5738	2.93955	0.521681	0.0197345	6.81168
KEGG_PATHWAY	mmu05322:Systemic lupus erythematosus	13	2.95455	0.00786441	HIST2H3B, ACTN4, C3, ELANE, CD40, C1QC, IL10, C1QA, C1RA, C1QB, H2AFV, IFNG, CTSG	305	103	5738	2.37447	0.612275	0.0246249	8.6649
KEGG_PATHWAY	mmu05330:Allograft rejection	9	2.04545	0.0107215	H2-K1, H2-M2, IFNG, IL12A, H2-T22, IL12B, FAS, CD40, IL10	305	58	5738	2.91928	0.725697	0.0326233	11.639
KEGG_PATHWAY	mmu04666:Fc gamma R-mediated phagocytosis	12	2.72727	0.0139902	PLA2G4A, PLD1, DNM1L, GAB2, MARCKSL1, HCK, RAF1, INPP5D, PPAP2A, VAV2, VAV1, VASP	305	98	5738	2.30365	0.815605	0.0413861	14.9331
KEGG_PATHWAY	mmu04350:TGF-beta signaling pathway	11	2.5	0.0160276	INHBA, ACVR1B, LTBP1, ROCK1, ROCK2, IFNG, RHOA, SMURF2, SMURF1, SKP1A, THBS1	305	87	5738	2.37867	0.856137	0.0461893	16.9292
KEGG_PATHWAY	mmu05220:Chronic myeloid leukemia	10	2.27273	0.0182353	ACVR1B, CBLC, CBLB, BCR, GAB2, ARAF, RAF1, SHC3, SHC2, SHC4	305	76	5738	2.47541	0.890127	0.0512232	19.0437
KEGG_PATHWAY	mmu05414:Dilated cardiomyopathy	11	2.5	0.0229242	ADCY2, ITGA5, ITGAV, ADCY5, ITGB5, IGF1, GNAS, PRKACA, ITGA3, PRKACB, PRKX	305	92	5738	2.24939	0.938143	0.0626695	23.3728
KEGG_PATHWAY	mmu04662:B cell receptor signaling pathway	10	2.27273	0.024713	FOS, BCL10, PPP3CB, RAF1, CD22, PIK3AP1, MALT1, INPP5D, VAV2, VAV1	305	80	5738	2.35164	0.950353	0.0659693	24.9678
KEGG_PATHWAY	mmu04623:Cytosolic DNA-sensing pathway	8	1.81818	0.0249297	IL6, IL18, PYCARD, RIPK3, IL1B, CCL5, CASP1, ZBP1	305	55	5738	2.73645	0.951659	0.0651057	25.1589
KEGG_PATHWAY	mmu05014:Amyotrophic lateral sclerosis (ALS)	8	1.81818	0.0297078	TNFRSF1A, GPX1, TNFRSF1B, MAPK12, MAPK13, PPP3CB, MAPK11, CASP1	305	57	5738	2.64044	0.973189	0.0756579	29.2624
KEGG_PATHWAY	mmu05332:Graft-versus-host disease	8	1.81818	0.0323137	H2-K1, IL6, H2-M2, IFNG, H2-T22, IL1B, FAS, IL1A	305	58	5738	2.59491	0.980584	0.0804452	31.4129
KEGG_PATHWAY	mmu05218:Melanoma	9	2.04545	0.0329972	FGFR1, PDGFB, MITF, ARAF, RAF1, IGF1, EGF, FGF1, FGF2	305	71	5738	2.38476	0.982163	0.0804627	31.9669
KEGG_PATHWAY	mmu05215:Prostate cancer	10	2.27273	0.047721	FGFR1, ATF4, PDGFB, CREB3, CREB1, ARAF, RAF1, IGF1, CREB3L3, EGF	305	90	5738	2.09035	0.997171	0.112856	42.9537
KEGG_PATHWAY	mmu04120:Ubiquitin mediated proteolysis	13	2.95455	0.0557727	XIAP, SOCS3, UBA7, SKP1A, BIRC3, BIRC2, CBLC, CBLB, NEDD4, WWP1, SMURF2, SMURF1, ITCH	305	136	5738	1.79831	0.998979	0.128668	48.2517
KEGG_PATHWAY	mmu04514:Cell adhesion molecules (CAMs)	14	3.18182	0.0637079	H2-K1, ICAM1, CD8A, H2-M2, SELL, ICAM2, CD40, SDC4, SDC2, SDC3, ITGAV, H2-T22, CD22, SELPLG	305	154	5738	1.71028	0.999629	0.14349	53.0299
KEGG_PATHWAY	mmu04150:mTOR signaling pathway	7	1.59091	0.0643097	VEGFB, VEGFC, PGF, RPS6KA2, VEGFA, IGF1, FIGF	305	54	5738	2.43874	0.999657	0.142208	53.3752
KEGG_PATHWAY	mmu04672:Intestinal immune network for IgA production	7	1.59091	0.0643097	CCR9, IL6, IL15RA, IL15, CD40, MAP3K14, IL10	305	54	5738	2.43874	0.999657	0.142208	53.3752
KEGG_PATHWAY	mmu04622:RIG-I-like receptor signaling pathway	8	1.81818	0.0669251	ISG15, MAPK12, MAPK13, IL12A, MAPK11, IL12B, MAPK10, TANK	305	68	5738	2.21331	0.999755	0.145157	54.8496
KEGG_PATHWAY	mmu05221:Acute myeloid leukemia	7	1.59091	0.0793872	JUP, CEBPA, ARAF, RAF1, SFPI1, PIM2, STAT3	305	57	5738	2.31038	0.999951	0.167908	61.3074
