# Supplementary material for: Linking Transcriptional Changes over Time in Stimulated Dendritic Cells to Identify Gene Networks Activated during the Innate Immune Response
Source: PLoS Comput Biol. 2013 Nov 7;9(11):e1003323. doi: 10.1371/journal.pcbi.1003323 (PMC3820512; doi:10.1371/journal.pcbi.1003323)
Supplement: Table S13 — KEGG pathways enriched in genes identified exclusively in the network predicted for the MyD88-knockout dendritic cells. (XLSX) [file pcbi.1003323.s021.xlsx]

## Sheet: Myd88KO_unique_candidates_enric
Supporting Table S13. KEGG pathways enriched in genes identified exclusively in the network predicted for the MyD88 knockout sample
Category	Term	Count	%	PValue	Genes	List Total	Pop Hits	Pop Total	Fold Enrichment	Bonferroni	Benjamini	FDR
KEGG_PATHWAY	mmu04710:Circadian rhythm	8	1.67364	4.91701e-07	NPAS2, CSNK1D, CSNK1E, PER2, PER3, ARNTL, CRY1, CLOCK	261	13	5738	13.529	6.29358e-05	6.29358e-05	0.000571028
KEGG_PATHWAY	mmu05222:Small cell lung cancer	17	3.55649	9.38099e-07	COL4A1, CYCT, CYCS, GM10053, BCL2L1, RB1, CDK4, ITGB1, PTEN, MAX, CDKN1B, ITGA6, PIAS4, PIAS3, LAMC1, APAF1, ITGA2B, FN1	261	85	5738	4.39693	0.00012007	6.00366e-05	0.00108944
KEGG_PATHWAY	mmu04120:Ubiquitin mediated proteolysis	21	4.39331	2.49928e-06	FZR1, VHL, HERC4, KEAP1, HERC3, PARK2, CDC16, MID1, UBE2B, CDC27, BRCA1, RBX1, CUL3, UBE2N, UBE2D3, UBE2D2, PIAS4, PIAS3, UBE2W, UBE2D1, UBE2S	261	136	5738	3.39469	0.000319858	0.000106631	0.00290246
KEGG_PATHWAY	mmu05200:Pathways in cancer	35	7.32218	2.59421e-06	PPARG, MLH1, FOXO1, GM10053, BCL2L1, ITGB1, PTEN, CTNNB1, RBX1, MAX, FASL, RARA, AXIN2, FN1, AXIN1, COL4A1, MAP2K2, VHL, CYCT, CYCS, CREBBP, SMAD2, RB1, BAD, CDK4, RASSF5, HSP90B1, CDKN1B, CRKL, ITGA6, PIAS4, PIAS3, PDGFRA, JAK1, LAMC1, ITGA2B	261	323	5738	2.38224	0.000332004	8.30112e-05	0.0030127
KEGG_PATHWAY	mmu05010:Alzheimer's disease	21	4.39331	0.000189067	NOS1, CYCT, APH1C, ATP5B, CYCS, NDUFA7, SNCA, PPP3R1, GM10053, BAD, CAPN2, NCSTN, NDUFS7, NDUFV1, GRIN2D, CASP7, PSEN2, BACE1, APAF1, NDUFS3, NDUFS2, NDUFS1	261	182	5738	2.53669	0.0239123	0.00482887	0.219349
KEGG_PATHWAY	mmu04510:Focal adhesion	22	4.60251	0.000215724	TLN1, COL4A1, PIP5K1C, ACTN1, MYL12B, BAD, CAPN2, PPP1CC, PTEN, ITGB1, CTNNB1, PAK6, CRKL, ITGA6, CCND2, PAK3, ILK, PDGFRA, PAK1, LAMC1, ITGA2B, FN1	261	198	5738	2.44274	0.0272378	0.00459203	0.250241
KEGG_PATHWAY	mmu04210:Apoptosis	12	2.51046	0.00175168	CFLAR, CYCT, CYCS, PPP3R1, GM10053, BAD, BCL2L1, CAPN2, TRADD, CASP7, CSF2RB, FASL, APAF1	261	87	5738	3.03237	0.201014	0.0315504	2.01548
KEGG_PATHWAY	mmu04110:Cell cycle	15	3.13808	0.00182195	YWHAZ, FZR1, CREBBP, SMAD2, PTTG1, CDC16, SFN, RB1, CDK4, CDC27, RBX1, CDKN1B, CCND2, YWHAQ, CCNA2	261	128	5738	2.57633	0.208181	0.0287562	2.09555
KEGG_PATHWAY	mmu04114:Oocyte meiosis	14	2.92887	0.00195508	YWHAZ, PPP2R5B, PPP2R5A, PPP2R5D, PPP2R5C, SGOL1, PPP3R1, PTTG1, CDC16, PPP1CC, CDC27, RBX1, YWHAQ, PPP2R5E	261	115	5738	2.6764	0.221585	0.0274491	2.24709
KEGG_PATHWAY	mmu05213:Endometrial cancer	9	1.88285	0.00211803	MAP2K2, ILK, MLH1, FOXO3, BAD, AXIN2, PTEN, CTNNB1, AXIN1	261	52	5738	3.80504	0.237685	0.0267745	2.43227
KEGG_PATHWAY	mmu04660:T cell receptor signaling pathway	14	2.92887	0.00246649	PDK1, CD3G, CD3D, CD3E, MAP2K2, CD247, PPP3R1, CDK4, PAK6, PAK3, MAP3K8, NFAT5, PAK1, LCP2	261	118	5738	2.60835	0.271014	0.0283275	2.82722
KEGG_PATHWAY	mmu04310:Wnt signaling pathway	16	3.34728	0.00288882	PPP2R5B, PPP2R5A, PPP2R5D, PPP2R5C, CREBBP, PPP3R1, CSNK2B, SMAD2, RBX1, CTNNB1, CCND2, CSNK1E, NFAT5, PPP2R5E, AXIN2, AXIN1	261	149	5738	2.36077	0.309476	0.0303874	3.30393
KEGG_PATHWAY	mmu05014:Amyotrophic lateral sclerosis (ALS)	9	1.88285	0.00382593	NOS1, GRIA2, CYCT, GRIN2D, CYCS, PPP3R1, GM10053, BCL2L1, APAF1, BAD	261	57	5738	3.47126	0.387777	0.0370395	4.35406
KEGG_PATHWAY	mmu04810:Regulation of actin cytoskeleton	20	4.1841	0.00419867	GIT1, ARHGEF7, MAP2K2, ARHGEF6, PIP5K1C, ACTN1, MYL12B, ARPC5, PPP1CC, ITGB1, WAS, PAK6, CRKL, ITGA6, PAK3, PDGFRA, PAK1, PIP4K2C, ITGA2B, FN1	261	217	5738	2.02624	0.416412	0.0377381	4.76886
KEGG_PATHWAY	mmu04144:Endocytosis	19	3.9749	0.00437974	GIT1, STAMBP, PARD6A, 2610002M06RIK, CHMP4B, TSG101, RAB5C, VTA1, CXCR1, PIP5K1C, EEA1, ARF6, CHMP1A, SNF8, PDGFRA, RAB11A, HGS, STAM, AP2M1	261	202	5738	2.06787	0.42984	0.036763	4.96976
KEGG_PATHWAY	mmu05012:Parkinson's disease	14	2.92887	0.00692191	CYCT, ATP5B, CYCS, NDUFA7, SNCA, GM10053, PARK2, VDAC1, NDUFS7, 2810422J05RIK, NDUFV1, APAF1, NDUFS3, NDUFS2, NDUFS1	261	133	5738	2.31418	0.588968	0.0540521	7.74981
KEGG_PATHWAY	mmu05016:Huntington's disease	17	3.55649	0.00843878	CYCT, ATP5B, PPARG, CYCS, CREBBP, NDUFA7, GM10053, POLR2A, VDAC1, NDUFS7, NDUFV1, IFT57, APAF1, NDUFS3, NDUFS2, NDUFS1, AP2M1, HIP1	261	183	5738	2.04229	0.662013	0.0618155	9.37302
KEGG_PATHWAY	mmu05215:Prostate cancer	10	2.09205	0.0200197	HSP90B1, CDKN1B, MAP2K2, CREBBP, PDGFRA, FOXO1, RB1, BAD, PTEN, CTNNB1	261	90	5738	2.44274	0.924869	0.133945	20.9314
KEGG_PATHWAY	mmu00330:Arginine and proline metabolism	7	1.46444	0.0314867	ARG1, GLUL, NOS1, P4HA2, P4HA1, GLS, NOS3	261	53	5738	2.90364	0.983346	0.193888	31.0333
KEGG_PATHWAY	mmu04722:Neurotrophin signaling pathway	12	2.51046	0.0329729	PDK1, YWHAZ, CRKL, MAP3K3, MAP2K2, YWHAQ, NGFRAP1, FASL, FOXO3, NGFR, BAD, IRS1	261	130	5738	2.02935	0.986318	0.193123	32.2524
KEGG_PATHWAY	mmu04115:p53 signaling pathway	8	1.67364	0.0356051	CCND2, CYCT, TSC2, CYCS, GM10053, SFN, APAF1, CDK4, PTEN	261	69	5738	2.54895	0.990348	0.198267	34.3633
KEGG_PATHWAY	mmu05211:Renal cell carcinoma	8	1.67364	0.0380953	PAK6, CRKL, VHL, PAK3, MAP2K2, CREBBP, PAK1, RBX1	261	70	5738	2.51253	0.993067	0.202264	36.3047
KEGG_PATHWAY	mmu05210:Colorectal cancer	9	1.88285	0.0400802	CYCT, CYCS, PDGFRA, MLH1, SMAD2, GM10053, BAD, AXIN2, CTNNB1, AXIN1	261	86	5738	2.30072	0.994678	0.203595	37.8146
KEGG_PATHWAY	mmu04012:ErbB signaling pathway	9	1.88285	0.042484	PAK6, CRKL, CDKN1B, PAK3, MAP2K2, RPS6KB2, RPS6KB1, PAK1, BAD	261	87	5738	2.27428	0.996139	0.206685	39.5992
KEGG_PATHWAY	mmu04910:Insulin signaling pathway	12	2.51046	0.047674	CRKL, INPP5K, MAP2K2, FLOT1, TSC2, FOXO1, HK1, RPS6KB2, RPS6KB1, BAD, PPP1CC, IRS1	261	138	5738	1.91171	0.998074	0.221278	43.2938
KEGG_PATHWAY	mmu04666:Fc gamma R-mediated phagocytosis	9	1.88285	0.0753014	CRKL, WASF3, RPS6KB2, PIP5K1C, RPS6KB1, ARF6, PAK1, ARPC5, WAS	261	98	5738	2.019	0.999956	0.319832	59.7145
KEGG_PATHWAY	mmu04142:Lysosome	10	2.09205	0.0896173	GM2A, PSAP, ATP6V0A1, CTSD, AP3S1, SCARB2, GGA1, GGA2, CTSH, GBA	261	119	5738	1.84745	0.999994	0.359246	66.3911
KEGG_PATHWAY	mmu04150:mTOR signaling pathway	6	1.25523	0.0961665	STK11, TSC2, RPS6KB2, RPS6KB1, CAB39, DDIT4	261	54	5738	2.44274	0.999998	0.370115	69.0942
KEGG_PATHWAY	mmu05223:Non-small cell lung cancer	6	1.25523	0.0961665	RASSF5, MAP2K2, FOXO3, RB1, BAD, CDK4	261	54	5738	2.44274	0.999998	0.370115	69.0942
