# Supplementary material for: Linking Transcriptional Changes over Time in Stimulated Dendritic Cells to Identify Gene Networks Activated during the Innate Immune Response
Source: PLoS Comput Biol. 2013 Nov 7;9(11):e1003323. doi: 10.1371/journal.pcbi.1003323 (PMC3820512; doi:10.1371/journal.pcbi.1003323)
Supplement: Table S14 — Counts of RNA-seq reads obtained before LPS stimulation and up to 8 hours after stimulation, identified and mapped. (XLSX) [file pcbi.1003323.s022.xlsx]

## Sheet: RNA-seq tag counts
Supporting Table S14. RNA-seq reads identified and mapped
Time	0hr	0.5hr	1hr	2hrs	3hrs	4hrs	6hrs	8hrs	16hrs	24hrs
Total Reads	29.57M	26.85M	29.59M	28.11M	27.74M	28.51M	29.13M	28.16M	27.70M	28.27M
Mapped Reads	28.26M	25.63M	28.13M	26.78M	26.46M	27.20M	28.02M	27.08M	26.54M	27.10M
