# Supplementary material for: Linking Transcriptional Changes over Time in Stimulated Dendritic Cells to Identify Gene Networks Activated during the Innate Immune Response
Source: PLoS Comput Biol. 2013 Nov 7;9(11):e1003323. doi: 10.1371/journal.pcbi.1003323 (PMC3820512; doi:10.1371/journal.pcbi.1003323)
Supplement: Table S15 — Genes showing greater than two-fold change in expression in wild-type dendritic cells between 0.5–8 hours after LPS stimulation. (XLSX) [file pcbi.1003323.s023.xlsx]

## Sheet: Wild-type Gene groups
Supporting Table S15. Genes showing greater than two-fold change in expression in wild-type DCs between 0.5 - 8 hours after LPS stimulation
Gene name	Unstimulated (0 hours)	Expression on LPS stimulation (FPKM)							Log fold change in expression							Time of expression	Time group
		0.5	1	2	3	4	6	8	0.5	1	2	3	4	6	8
Egr1	10.7023	1001.51	437.467	33.7804	10.6295	7.41115	5.91821	3.87419	6.54811	5.35318	1.65827	-0.00984714	-0.530152	-0.854688	-1.46595	0.5	1
Dusp1	31.4534	560.238	439.935	72.8382	50.6046	61.0672	81.8505	91.2949	4.15475	3.806	1.21148	0.686053	0.957182	1.37978	1.53732	0.5	1
Zfp36	68.9617	898.474	475.439	98.4285	191.324	240.19	261.437	192.1	3.70361	2.78539	0.513281	1.47215	1.80031	1.9226	1.47799	0.5	1
Nr4a1	2.16048	150.244	64.2075	9.99904	4.94614	3.84644	3.6138	4.5501	6.11981	4.89332	2.21044	1.19495	0.832172	0.742165	1.07455	0.5	1
Ier3	128.125	1039.7	1035.69	696.2	426.101	328.699	402.162	348.86	3.02054	3.01497	2.44195	1.73364	1.35922	1.65022	1.4451	0.5	1
Junb	109.392	976.581	844.494	345.678	284.799	238.344	254.068	199.892	3.15823	2.94858	1.65992	1.38044	1.12354	1.21571	0.869713	0.5	1
Gadd45a	19.3035	291.924	217.552	82.4312	40.3319	22.078	13.6041	13.7248	3.91866	3.49443	2.09433	1.06306	0.193747	-0.504821	-0.492077	0.5	1
Fos	30.2187	371.533	66.2796	11.909	8.17871	13.2931	20.5154	26.4831	3.61998	1.13312	-1.34339	-1.8855	-1.18476	-0.558734	-0.19037	0.5	1
Ppp1r15a	15.4921	179.032	143.886	55.945	32.5666	22.6024	24.4657	21.3881	3.53061	3.21532	1.85248	1.07186	0.544943	0.659228	0.465276	0.5	1
Rgs1	74.5722	441.273	356.552	247.14	125.146	88.4625	52.5705	40.5885	2.56496	2.2574	1.72862	0.746902	0.246428	-0.504384	-0.877567	0.5	1
Btg2	27.6144	241.118	99.3221	24.6555	18.2497	19.7516	23.9873	19.7583	3.12625	1.84669	-0.163511	-0.597548	-0.483451	-0.20315	-0.482962	0.5	1
Gpi1	664.432	2301.87	1909.38	1308.07	934.135	723.294	528.805	484.829	1.79261	1.52291	0.977246	0.49151	0.122461	-0.329386	-0.454646	0.5	1
Ero1l	178.87	704.437	591.337	410.779	357.225	293.782	209.359	241.076	1.97756	1.72507	1.19945	0.997922	0.715835	0.227067	0.430577	0.5	1
Osm	7.47114	81.4111	64.9937	27.3408	9.93169	8.7819	12.1634	15.0865	3.44583	3.1209	1.87166	0.410711	0.233205	0.703146	1.01386	0.5	1
Ifrd1	40.2891	219.486	202.946	99.2732	64.3772	55.971	60.7749	55.46	2.44567	2.33263	1.30101	0.67616	0.47429	0.593086	0.461058	0.5	1
Vegfa	215.101	780.538	534.457	200.842	174.778	205.558	226.114	277.867	1.85945	1.31306	-0.0989532	-0.299491	-0.0654687	0.0720361	0.36938	0.5	1
Nfil3	48.5383	244.989	134.545	34.935	55.557	66.6534	57.063	71.3668	2.33552	1.47089	-0.47445	0.194845	0.457555	0.233432	0.55613	0.5	1
Plin2	688.436	227.646	263.478	463.192	576.491	610.003	971.182	736.05	-1.59653	-1.38564	-0.571712	-0.256024	-0.174506	0.496419	0.0964812	0.5	1
Hist1h1c	63.4583	289.356	205.617	81.9997	28.3159	20.9385	47.8862	66.61	2.18896	1.69608	0.36981	-1.1642	-1.59965	-0.406199	0.0699299	0.5	1
Ccnl1	34.7579	163.312	153.77	87.4213	73.5714	70.621	60.1938	51.4172	2.23222	2.14536	1.33064	1.0818	1.02276	0.792274	0.56491	0.5	1
Tiparp	19.3382	110.949	67.5845	25.748	51.5883	54.3154	31.2275	30.1174	2.52037	1.80524	0.413007	1.41559	1.48991	0.691364	0.639144	0.5	1
Sgk1	95.1011	363.009	226.708	66.3727	64.1768	89.1852	157.945	178.825	1.93247	1.2533	-0.518872	-0.56741	-0.0926577	0.731888	0.911015	0.5	1
Ndrg1	72.823	260.805	245.631	185.151	145.739	113.892	66.0046	59.9327	1.84051	1.75403	1.34624	1.00092	0.6452	-0.141828	-0.281051	0.5	1
Actb	3537	1669.7	2335.44	2978.71	4052.66	4849.46	6505.18	6437.01	-1.08294	-0.598832	-0.247839	0.196343	0.455298	0.879063	0.863864	0.5	1
Gstp1	558.777	209.365	211.54	236.192	219.992	227.364	355.244	347.29	-1.41625	-1.40134	-1.24231	-1.34482	-1.29727	-0.653462	-0.686132	0.5	1
Slc2a3	14.0895	79.1624	55.8993	21.3807	9.01424	8.00397	6.38008	6.99231	2.49019	1.98821	0.601689	-0.644343	-0.815833	-1.14297	-1.01078	0.5	1
Pfn1	1224.32	562.29	716.994	1037.32	1166.36	1147.44	1671.92	1404.45	-1.12259	-0.771948	-0.23912	-0.0699675	-0.093562	0.449525	0.198025	0.5	1
Fosl2	45.3489	160.826	115.489	72.2527	48.7426	48.8101	38.341	45.5083	1.82636	1.34862	0.671984	0.104116	0.106112	-0.24218	0.00506214	0.5	1
Nr1d1	2.10538	25.4794	15.9386	4.82673	3.58333	3.10219	2.94049	3.33439	3.59718	2.92037	1.19697	0.76722	0.559206	0.481976	0.663342	0.5	1
Jun	48.3968	168.133	64.072	26.7791	25.7326	26.6303	50.9031	60.9006	1.79662	0.404782	-0.853804	-0.911314	-0.861843	0.0728419	0.331545	0.5	1
Trib1	8.97027	52.4116	33.6752	7.85747	7.04041	6.78134	6.42608	6.13818	2.54666	1.90846	-0.191087	-0.349492	-0.403581	-0.481212	-0.54734	0.5	1
Sat1	227.084	521.288	468.533	339.52	278.99	253.67	273.307	224.043	1.19885	1.04492	0.580271	0.296987	0.159727	0.267296	-0.0194504	0.5	1
Fcgr2b	546.732	1114.19	1060.7	914.372	648.385	545.684	551.211	689.634	1.02709	0.956111	0.741947	0.246017	-0.00276808	0.0117709	0.334997	0.5	1
Tubb5	123.17	309.982	210.55	117.82	117.504	118.224	113.886	133.559	1.33153	0.773512	-0.0640664	-0.067941	-0.059128	-0.113061	0.116826	0.5	1
Adrb2	5.81337	38.0764	27.871	7.28616	3.4719	2.98112	4.05994	5.3998	2.71145	2.26132	0.325784	-0.743649	-0.96352	-0.517916	-0.106469	0.5	1
Zfp36l1	61.0763	176.359	154.075	71.8758	33.5718	33.4538	34.7184	51.3694	1.52983	1.33495	0.234893	-0.863363	-0.868443	-0.814912	-0.249703	0.5	1
Ddx39	29.3702	7.40786	10.1488	23.4644	35.2644	38.0478	40.1011	32.4359	-1.98722	-1.53304	-0.32388	0.263859	0.37346	0.449289	0.143238	0.5	1
Sfpi1	256.476	113.806	118.417	214.936	289.77	286.568	374.729	305.623	-1.17225	-1.11495	-0.254917	0.176084	0.160054	0.547024	0.252929	0.5	1
Eif4a2	77.5839	203.888	154.835	109.061	73.632	69.3169	60.0348	67.1119	1.39395	0.996902	0.491306	-0.0754244	-0.16255	-0.369958	-0.209189	0.5	1
Vdac1	144.345	327.416	284.811	220.535	196.407	172.381	140.106	110.771	1.1816	0.980484	0.611487	0.444325	0.25608	-0.0430024	-0.381941	0.5	1
Dedd2	9.47135	47.9486	23.5173	9.20709	6.13636	4.79327	5.47185	7.40468	2.33985	1.31208	-0.0408248	-0.626187	-0.98256	-0.791541	-0.355133	0.5	1
Lepr	10.3113	43.4554	38.874	20.6606	16.8416	13.7946	6.51502	6.85363	2.07531	1.91458	1.00266	0.707803	0.419877	-0.662385	-0.589286	0.5	1
Pmaip1	7.31735	38.8674	28.4993	7.74994	4.25521	4.38062	4.05249	4.87983	2.40917	1.96153	0.0828639	-0.782091	-0.740186	-0.852513	-0.58449	0.5	1
Cenpa	8.12199	37.6009	33.2173	21.8131	10.17	6.28101	3.28319	3.3879	2.21086	2.03203	1.42529	0.324415	-0.370837	-1.30674	-1.26144	0.5	1
Ranbp1	58.3557	20.7831	23.6022	50.7739	69.8494	83.7107	102.83	55.2645	-1.48946	-1.30595	-0.200787	0.259374	0.520538	0.817316	-0.0785205	0.5	1
Cyb5	418.595	201.116	211.276	250.09	232.99	220.453	413.296	398.321	-1.05753	-0.986426	-0.743108	-0.845287	-0.925084	-0.0183797	-0.0716235	0.5	1
Gyg	46.1642	123.331	111.175	74.5155	51.7356	46.0861	41.4149	50.2684	1.41769	1.26799	0.690766	0.164383	-0.0024428	-0.156625	0.122877	0.5	1
Npepps	45.7325	119.879	87.3296	58.371	46.4728	47.579	48.0201	42.4918	1.39029	0.933251	0.352032	0.0231668	0.0571052	0.0704186	-0.106035	0.5	1
Polr2f	89.6664	35.3713	41.3058	53.0165	55.1167	60.5678	95.5146	85.034	-1.34199	-1.11822	-0.758126	-0.702078	-0.566016	0.0911538	-0.0765277	0.5	1
Ell	20.8344	69.5151	35.1792	15.797	13.2641	12.4381	13.3208	16.4203	1.73836	0.755755	-0.399317	-0.651441	-0.744201	-0.645287	-0.343487	0.5	1
Gna13	30.15	79.996	79.6491	52.3632	37.0607	41.2499	36.6187	40.4637	1.40777	1.4015	0.796395	0.297732	0.452233	0.280423	0.42447	0.5	1
Map3k8	8.86276	31.475	25.1418	16.7431	19.5361	22.7021	17.5356	15.2519	1.82838	1.50426	0.917739	1.14031	1.357	0.984459	0.783161	0.5	1
Gadd45g	21.7978	64.2695	31.449	26.6073	19.1782	22.5388	43.3249	32.7213	1.55995	0.528832	0.28764	-0.184715	0.0482282	0.991014	0.586048	0.5	1
Ywhab	76.7408	31.9783	40.3788	65.8319	87.1598	96.5233	93.1511	81.1798	-1.2629	-0.926396	-0.221207	0.183669	0.330883	0.279579	0.081127	0.5	1
Msr1	136.898	65.139	69.7861	80.7937	109.704	153.874	207.991	256.839	-1.07151	-0.97209	-0.760787	-0.319485	0.168648	0.60342	0.907763	0.5	1
Hnrnpm	73.3411	32.764	49.6987	90.0304	116.163	110.185	102.774	75.5948	-1.16251	-0.561414	0.29579	0.663457	0.587234	0.486782	0.0436651	0.5	1
Got1	25.5573	68.2003	63.7436	44.0626	25.9455	17.3658	14.3003	17.701	1.41604	1.31855	0.785819	0.0217489	-0.557487	-0.83769	-0.529905	0.5	1
Gar1	12.3274	2.97163	5.98222	19.2622	17.9364	13.8678	9.50456	5.13732	-2.05254	-1.04312	0.643904	0.541022	0.16987	-0.375177	-1.26278	0.5	1
Lsm7	44.9725	16.6076	20.526	27.8568	26.2381	27.4887	45.0988	27.6796	-1.4372	-1.13159	-0.691014	-0.77738	-0.710204	0.00404596	-0.70022	0.5	1
Rexo2	49.9485	19.6468	23.8232	34.5718	37.9792	34.6202	47.0293	39.1574	-1.34615	-1.06807	-0.530846	-0.395232	-0.528827	-0.0868815	-0.351156	0.5	1
Sertad1	26.4345	62.385	52.5748	37.0211	48.6582	45.4918	57.7597	39.6133	1.23878	0.991949	0.485926	0.880261	0.783184	1.12764	0.583563	0.5	1
P4ha1	70.4897	143.176	117.632	92.8304	89.2773	91.2858	107.507	116.411	1.02231	0.738796	0.397185	0.340881	0.372978	0.608946	0.723743	0.5	1
Ppp1r3b	13.3414	45.5491	11.5851	3.11199	7.16848	10.4732	9.54027	13.3273	1.77151	-0.20364	-2.1	-0.896171	-0.349208	-0.483808	-0.00152553	0.5	1
Mknk2	62.5757	136.796	124.749	65.2021	23.0641	16.395	26.2009	47.5869	1.12835	0.995354	0.0593159	-1.43995	-1.93235	-1.25599	-0.395038	0.5	1
Fxr1	29.7107	67.4837	61.9251	54.9981	48.7636	50.4161	46.2704	46.263	1.18356	1.05954	0.888399	0.714822	0.762902	0.639107	0.638876	0.5	1
Csda	76.7357	36.0147	40.6738	73.4871	86.7633	86.9798	89.8583	58.181	-1.09131	-0.915798	-0.0624069	0.177187	0.180782	0.227754	-0.39935	0.5	1
Erh	80.2863	38.4643	47.448	85.1876	96.9744	93.6898	100.298	73.1391	-1.06163	-0.758807	0.0854896	0.27245	0.222738	0.321067	-0.134511	0.5	1
Ran	78.3	38.354	50.1091	87.2984	119.304	117.169	110.198	78.9941	-1.02964	-0.64394	0.156943	0.607558	0.581507	0.493014	0.0127326	0.5	1
Hopx	25.0237	61.1459	53.5622	44.7365	30.7063	22.4421	18.7604	20.4062	1.28896	1.09792	0.838157	0.29524	-0.157087	-0.415605	-0.294288	0.5	1
Psmc5	47.9539	21.6033	29.8033	52.2256	64.5215	62.8494	81.0987	62.6573	-1.1504	-0.686176	0.123109	0.428132	0.390251	0.758031	0.385834	0.5	1
Dgat1	19.2432	49.8706	49.7375	30.7396	19.0832	14.3895	13.1576	15.4936	1.37384	1.36999	0.67575	-0.0120456	-0.419332	-0.548452	-0.312676	0.5	1
Cdkn1b	29.7036	69.789	50.6677	39.7854	26.8434	24.9717	27.7986	31.3252	1.23236	0.770429	0.421601	-0.14607	-0.250344	-0.0956256	0.0766859	0.5	1
Cmtm3	41.8659	17.189	18.9613	29.9547	38.6658	38.9202	35.9163	34.3914	-1.28429	-1.14272	-0.482993	-0.114718	-0.105257	-0.221137	-0.283728	0.5	1
Fem1c	10.7334	32.3202	30.1072	15.0203	11.9123	12.0514	7.79483	9.15847	1.59033	1.488	0.484806	0.150345	0.167094	-0.461518	-0.228929	0.5	1
Agpat2	22.3294	8.51147	8.83641	16.4054	29.3661	32.7107	39.1742	31.3108	-1.39146	-1.33741	-0.444774	0.395207	0.550818	0.810959	0.487716	0.5	1
Vps39	11.2821	34.189	22.4881	11.0017	10.0497	10.9917	12.1181	11.061	1.5995	0.995126	-0.0363092	-0.166883	-0.0376211	0.103128	-0.0285538	0.5	1
Ubtf	25.9546	10.0897	11.3359	25.9328	36.1789	33.428	30.7678	21.6263	-1.36311	-1.19509	-0.00121227	0.479158	0.365067	0.245431	-0.263203	0.5	1
Sh3glb1	34.0381	71.5377	63.8492	57.4199	58.2438	58.6188	53.6743	53.9218	1.07155	0.907518	0.7544	0.774954	0.784213	0.657081	0.663718	0.5	1
Creb5	7.63964	23.1439	20.0661	11.6388	13.6753	18.8147	13.2096	10.4257	1.59906	1.39318	0.607366	0.839996	1.30028	0.79001	0.448568	0.5	1
Mrpl20	59.8042	28.6362	34.7053	54.8198	61.6882	61.8692	81.8605	63.5267	-1.06241	-0.785091	-0.12555	0.0447477	0.0489746	0.452921	0.0871163	0.5	1
Bop1	16.6021	5.75347	11.2606	20.2756	21.4218	22.3765	16.3469	12.2583	-1.52886	-0.560082	0.288379	0.367714	0.430619	-0.0223487	-0.437607	0.5	1
Dtx4	26.1878	10.5268	21.0736	44.2049	32.7059	25.2085	19.3468	18.0912	-1.31483	-0.313458	0.755311	0.320656	-0.0549846	-0.4368	-0.533607	0.5	1
Pold4	59.8338	120.087	101.515	74.9607	47.7175	42.054	36.492	44.7969	1.00505	0.76266	0.325174	-0.326442	-0.508718	-0.71338	-0.417562	0.5	1
Afg3l2	37.2097	78.5934	64.9822	38.7974	29.4248	37.851	42.3385	37.7161	1.07873	0.804366	0.0602812	-0.338646	0.0246527	0.186291	0.0195017	0.5	1
Cav2	40.4219	18.3925	23.5573	32.9187	40.7215	39.525	42.4859	63.7209	-1.13602	-0.778963	-0.29623	0.0106536	-0.0323717	0.071847	0.65663	0.5	1
Zfp622	9.5235	26.236	25.9987	19.7399	15.9784	11.9966	12.6212	10.4899	1.46198	1.44888	1.05155	0.746559	0.333062	0.406285	0.139437	0.5	1
Siva1	28.638	62.1593	58.5665	53.721	30.5256	19.1379	30.9371	21.2741	1.11804	1.03214	0.907555	0.0920889	-0.581498	0.111407	-0.428833	0.5	1
Ephx1	16.2191	38.7103	34.9163	33.9294	25.0638	20.7374	17.1339	10.5916	1.25502	1.10621	1.06484	0.627911	0.354541	0.0791598	-0.614773	0.5	1
Id3	13.6742	38.7107	31.6511	10.2669	3.60634	3.66133	5.14351	9.25401	1.50128	1.2108	-0.413456	-1.92285	-1.90102	-1.41063	-0.563306	0.5	1
Selenbp1	42.9846	90.6684	74.4437	44.1704	24.0895	17.9252	13.2257	19.1666	1.07678	0.79233	0.03926	-0.835415	-1.26183	-1.70048	-1.16523	0.5	1
Srm	16.6049	4.8667	6.06901	10.9644	10.9061	11.3023	8.35884	6.76393	-1.77059	-1.45208	-0.598782	-0.606474	-0.554993	-0.990234	-1.29568	0.5	1
Psmd6	44.7938	22.1909	25.8433	49.4416	64.1505	72.5528	71.3958	55.8613	-1.01333	-0.793509	0.142426	0.518161	0.695732	0.67254	0.31855	0.5	1
Tsc22d3	23.5815	60.6394	26.6539	10.7373	6.42208	6.44868	5.42736	8.42046	1.3626	0.176691	-1.13502	-1.87654	-1.87058	-2.11933	-1.48568	0.5	1
Nt5c	45.3119	20.7031	23.9043	26.6469	30.6025	32.0226	44.5837	44.9621	-1.13004	-0.92262	-0.765922	-0.56624	-0.5008	-0.0233736	-0.0111806	0.5	1
Nme1	45.2257	20.3047	24.9619	30.6932	27.9641	26.5606	37.6345	31.0848	-1.15533	-0.857415	-0.559224	-0.693567	-0.767855	-0.265087	-0.540934	0.5	1
Cxcr7	13.2646	37.4562	25.8993	5.40349	4.85019	7.42703	6.9112	9.71681	1.49762	0.965332	-1.29562	-1.45147	-0.836724	-0.940573	-0.449027	0.5	1
Birc2	12.1342	30.0322	22.7675	15.885	19.0898	22.5855	19.2261	20.0788	1.30743	0.907897	0.388586	0.653723	0.896318	0.663987	0.726594	0.5	1
Lsr	36.1924	75.5086	68.753	48.8297	31.3969	21.8932	16.6409	12.5631	1.06095	0.925736	0.432072	-0.205065	-0.725204	-1.12095	-1.52649	0.5	1
Imp4	19.8139	7.67626	9.24107	17.9301	24.2689	22.6958	18.7186	14.1497	-1.36804	-1.10038	-0.144129	0.292596	0.195912	-0.0820403	-0.485741	0.5	1
Timm10	21.853	8.8027	12.1026	23.5419	28.7834	23.1227	19.9912	11.7795	-1.31181	-0.852514	0.107399	0.397406	0.0814785	-0.128466	-0.891553	0.5	1
Nub1	29.2024	59.3456	50.006	34.4965	38.7998	44.511	47.6473	32.4588	1.02305	0.776014	0.240363	0.409962	0.608075	0.706308	0.152523	0.5	1
Maged1	19.5832	42.851	40.3428	37.5753	30.9089	26.5501	20.481	17.7656	1.12971	1.04269	0.940168	0.658406	0.439101	0.0646696	-0.14053	0.5	1
Taf1d	11.0326	28.3544	26.3372	21.8541	16.0046	11.5878	8.71163	8.68942	1.3618	1.25533	0.986131	0.536714	0.0708339	-0.340758	-0.344441	0.5	1
Ddit3	19.9894	43.7413	29.2614	29.9064	22.1183	15.7153	30.4475	34.0475	1.12976	0.549764	0.581219	0.146005	-0.347065	0.607089	0.768314	0.5	1
Tbc1d15	16.1551	37.7037	34.3478	26.5424	19.1301	16.4768	10.3648	10.9769	1.22272	1.08823	0.716309	0.243855	0.0284464	-0.640297	-0.557519	0.5	1
Cir1	11.6285	31.8242	19.2383	8.72748	6.79132	7.57171	6.11689	6.31698	1.45246	0.726316	-0.414028	-0.775901	-0.618974	-0.926795	-0.880358	0.5	1
Tomm40	21.9043	9.26196	10.4841	17.7887	25.6792	25.4537	23.0715	15.3174	-1.24182	-1.06301	-0.300253	0.229386	0.216661	0.0748977	-0.516043	0.5	1
Hpse	11.4316	27.2832	22.186	18.6116	15.3092	14.1904	15.3017	19.1761	1.25499	0.956622	0.703175	0.421372	0.311888	0.420665	0.746282	0.5	1
Mea1	40.0015	19.5435	22.6396	27.102	29.4061	32.8769	50.1334	42.4717	-1.03337	-0.821206	-0.561655	-0.443939	-0.28298	0.325718	0.0864478	0.5	1
Necap1	21.3266	46.3606	24.4788	13.9482	22.642	26.337	22.9223	22.5701	1.12025	0.198879	-0.612575	0.0863474	0.304437	0.104098	0.0817588	0.5	1
Mapk1ip1	7.64017	24.5435	13.1553	4.64019	3.54238	3.42868	4.72003	6.49704	1.68366	0.783968	-0.719421	-1.10889	-1.15595	-0.694809	-0.233822	0.5	1
Tec	22.6867	51.7063	40.7243	11.3124	6.11568	8.54956	11.8498	12.1158	1.18849	0.844043	-1.00394	-1.89126	-1.40792	-0.936984	-0.904957	0.5	1
Ltc4s	12.7666	29.6426	25.9221	19.8422	14.7316	14.6359	18.9283	15.2504	1.2153	1.02181	0.636198	0.20654	0.197137	0.56817	0.256473	0.5	1
Rrp9	10.2297	3.59516	6.23582	14.7674	14.7022	14.7562	12.4774	6.08375	-1.50864	-0.714113	0.529652	0.523268	0.528557	0.286554	-0.749731	0.5	1
Cytip	32.0635	64.4489	60.5291	26.1121	15.2746	19.4003	16.2703	23.1791	1.00722	0.916697	-0.296213	-1.0698	-0.724853	-0.978691	-0.468107	0.5	1
Lypla2	37.5381	18.6197	19.9734	29.1045	34.1868	33.5044	39.3283	39.6337	-1.01153	-0.910276	-0.367113	-0.134916	-0.164005	0.0672122	0.078372	0.5	1
Mybbp1a	23.2803	10.3959	12.6138	23.1541	28.5094	29.7019	19.6699	13.0071	-1.16309	-0.884107	-0.00784197	0.292328	0.351446	-0.24312	-0.83981	0.5	1
Sf3b3	20.5431	9.04041	10.8725	17.3589	24.9159	26.4868	21.5983	17.8944	-1.18419	-0.91797	-0.242978	0.278413	0.36662	0.0722639	-0.199146	0.5	1
Nufip1	5.63572	16.1926	14.8591	8.40088	8.67414	9.93778	6.93045	6.75875	1.52266	1.39867	0.575941	0.622121	0.818324	0.298349	0.262157	0.5	1
Gtf2e2	17.8891	38.4666	33.177	14.8443	15.6047	19.6733	19.8761	22.8759	1.10453	0.891103	-0.269172	-0.1971	0.137158	0.151954	0.354748	0.5	1
Pepd	23.6239	11.013	13.4497	22.4933	26.8308	27.5785	32.7508	24.0874	-1.10104	-0.812673	-0.0707518	0.183643	0.223297	0.471283	0.0280315	0.5	1
Ppil1	10.7282	3.6772	3.69049	11.0758	13.6559	11.2696	12.3177	7.69764	-1.54473	-1.53952	0.0460029	0.348116	0.0710283	0.199325	-0.47892	0.5	1
Cops2	17.5829	36.554	31.004	24.8693	27.5163	27.899	20.8629	21.066	1.05586	0.818281	0.500193	0.646113	0.66604	0.246767	0.260743	0.5	1
Atad3a	10.9205	3.35879	4.73791	9.89916	10.4923	9.18758	6.38407	4.14506	-1.70103	-1.20472	-0.141661	-0.0577079	-0.249282	-0.774491	-1.39757	0.5	1
Atp2b1	24.8776	51.2348	51.056	27.1293	15.0992	14.7388	12.4668	12.6767	1.04228	1.03723	0.125005	-0.720375	-0.755228	-0.996756	-0.972668	0.5	1
Mier1	12.9383	29.6944	21.4931	15.1771	15.6407	14.5429	12.4447	12.8713	1.19854	0.732226	0.230248	0.273657	0.168667	-0.0561166	-0.0074903	0.5	1
Ruvbl1	13.8617	5.27989	6.57211	11.3877	14.9599	13.7808	14.4899	10.1222	-1.39252	-1.07668	-0.283628	0.109996	-0.00844456	0.0639434	-0.453581	0.5	1
Tnfrsf18	5.27864	16.9072	15.4806	9.51581	3.7551	3.28421	2.12851	2.73327	1.6794	1.55222	0.85016	-0.491315	-0.68462	-1.31032	-0.949538	0.5	1
Zranb1	7.84276	20.4033	14.9639	11.4105	11.3062	9.45262	7.61979	8.24614	1.37937	0.932053	0.540929	0.527681	0.269353	-0.0416102	0.0723575	0.5	1
Smc4	11.0279	27.8371	18.2128	8.81368	7.0602	8.76385	6.79853	9.403	1.33585	0.723795	-0.323342	-0.643377	-0.331521	-0.697863	-0.229965	0.5	1
Ncbp2	15.1582	5.42679	6.74508	8.52582	10.0738	9.92924	10.0347	10.3814	-1.48193	-1.16819	-0.830188	-0.58949	-0.610343	-0.595101	-0.546097	0.5	1
Kif21b	8.32073	23.1785	15.2596	7.52461	5.30304	5.00347	5.1075	6.603	1.47801	0.874935	-0.145093	-0.64989	-0.733781	-0.704093	-0.333588	0.5	1
Hspbp1	13.7298	5.20394	5.8062	10.1114	11.2923	11.206	16.8505	12.29	-1.39963	-1.24164	-0.441328	-0.281971	-0.293039	0.295481	-0.159826	0.5	1
Phb	27.6631	13.0403	15.3909	17.19	19.5595	22.5154	29.5894	26.3371	-1.08499	-0.845885	-0.686393	-0.500093	-0.297051	0.0971176	-0.0708663	0.5	1
Ebna1bp2	11.5543	4.63641	6.78624	13.2148	16.0471	16.6227	17.9376	11.2906	-1.31735	-0.767746	0.193725	0.473883	0.524725	0.634557	-0.0333077	0.5	1
Rusc2	18.1099	36.7184	28.5271	19.055	23.8873	25.1455	27.3527	22.3416	1.01972	0.655555	0.073391	0.399465	0.473522	0.594905	0.302954	0.5	1
Atg4c	9.14543	24.6654	17.9892	4.91818	2.65084	5.27611	6.0202	8.87204	1.43137	0.976008	-0.894926	-1.7866	-0.793576	-0.60324	-0.0437851	0.5	1
Dtx3	17.8827	37.6046	36.2268	23.8145	12.3992	10.6608	13.3398	17.8881	1.07234	1.01849	0.413276	-0.528318	-0.746249	-0.422828	0.000435582	0.5	1
Ints12	11.8878	26.8189	26.6536	14.4242	13.5601	13.2547	10.9789	12.3224	1.17377	1.16485	0.27901	0.189886	0.157022	-0.114748	0.0518015	0.5	1
Thoc6	12.6381	5.02482	6.42993	9.11206	12.6645	13.4749	17.9194	15.5882	-1.33064	-0.974905	-0.47193	0.00301053	0.092495	0.503743	0.302675	0.5	1
Traf6	7.19445	18.162	12.709	9.68701	10.5328	10.831	9.72977	11.043	1.33597	0.820894	0.429167	0.549933	0.59021	0.435521	0.618176	0.5	1
Ddx21	16.4072	7.41953	15.304	26.3277	26.2924	22.1564	11.561	9.102	-1.14493	-0.10042	0.682252	0.680317	0.433394	-0.505063	-0.850074	0.5	1
Prpf31	11.8833	4.48205	4.69447	7.55304	11.6367	13.2207	15.3892	10.5779	-1.4067	-1.3399	-0.653806	-0.0302535	0.153863	0.372983	-0.167882	0.5	1
Mettl9	17.3668	34.7788	31.8141	23.5701	19.4509	22.3598	19.2681	21.6343	1.00188	0.873334	0.440626	0.163505	0.364575	0.149882	0.316988	0.5	1
Map3k1	22.27	47.6385	26.3067	8.41582	8.20007	9.40241	8.86255	13.4019	1.09703	0.240329	-1.40393	-1.44139	-1.244	-1.32931	-0.732664	0.5	1
Mpp6	20.3472	40.7169	34.49	28.5893	23.9359	20.3299	12.886	8.12313	1.0008	0.761348	0.490645	0.234346	-0.00122716	-0.659026	-1.32472	0.5	1
Rb1	13.2646	30.4185	25.0445	14.888	7.27238	5.48498	5.36569	9.26671	1.19737	0.916913	0.166569	-0.867082	-1.27402	-1.30575	-0.517452	0.5	1
Ngfrap1	8.15463	19.4736	19.1603	15.9835	13.2178	9.81933	7.47983	4.65667	1.25583	1.23243	0.970892	0.696791	0.268005	-0.124614	-0.808321	0.5	1
Ccnk	13.0588	27.1864	26.5956	23.7793	18.3576	16.6782	14.8507	14.6139	1.05786	1.02617	0.864684	0.491355	0.352941	0.185509	0.162319	0.5	1
H2-Oa	7.28634	17.2493	16.5408	15.6027	12.9622	10.7588	9.23934	8.89257	1.24327	1.18276	1.09853	0.831044	0.562251	0.342595	0.287406	0.5	1
Ulk1	8.24476	21.0638	19.0122	9.13875	5.71791	5.22116	5.47345	6.43348	1.35322	1.20538	0.148519	-0.52799	-0.659107	-0.591027	-0.357878	0.5	1
Eef1e1	15.9527	7.13372	9.22398	19.0949	23.3219	18.3983	12.7288	8.77303	-1.16107	-0.790339	0.259387	0.547885	0.205772	-0.325704	-0.862654	0.5	1
Snapc1	8.75408	19.5618	17.8366	16.4739	14.2554	14.4929	10.7728	10.1688	1.16001	1.02681	0.912155	0.703481	0.727319	0.299366	0.216122	0.5	1
Dnajc11	12.1767	5.24045	5.90232	14.2006	18.9102	17.615	13.7246	9.47424	-1.21636	-1.04477	0.221829	0.635041	0.532681	0.172641	-0.362041	0.5	1
Med8	17.3708	8.64883	11.0464	22.1351	25.3151	23.9264	28.8213	21.3062	-1.00609	-0.653088	0.349672	0.543334	0.461939	0.730471	0.294609	0.5	1
Pole4	18.9256	9.08967	10.771	14.3556	19.5732	19.6357	22.3686	19.3085	-1.05804	-0.813187	-0.398725	0.0485406	0.05314	0.241136	0.0288971	0.5	1
Foxj3	8.1052	19.0144	14.7297	12.6195	10.9363	9.56997	7.31622	6.63521	1.23017	0.861808	0.638735	0.432205	0.239667	-0.147749	-0.288706	0.5	1
Snapc5	19.4109	9.11381	11.467	14.3757	17.7142	17.4863	16.3265	14.5659	-1.09074	-0.759379	-0.433235	-0.131961	-0.150642	-0.249651	-0.414272	0.5	1
Zfp524	13.445	29.3806	19.2737	10.6179	8.20909	7.62299	8.65616	9.45551	1.12779	0.519564	-0.340571	-0.711776	-0.818641	-0.635271	-0.507843	0.5	1
Arhgap1	19.4065	9.35075	13.0094	19.137	20.2079	18.4707	13.5302	14.3227	-1.05339	-0.576986	-0.0201753	0.0583795	-0.0713014	-0.520357	-0.438236	0.5	1
Hipk2	5.31289	13.4975	11.0535	10.3828	9.40388	10.1175	5.80343	3.97613	1.34512	1.05693	0.966627	0.823759	0.929284	0.127409	-0.418132	0.5	1
Ubqln4	12.6029	5.21201	5.24625	8.94015	12.9166	12.9247	10.8858	9.5134	-1.27384	-1.2644	-0.495385	0.0354706	0.036375	-0.211308	-0.405723	0.5	1
Wipi1	9.76728	20.784	17.1552	14.4417	10.5186	11.9884	12.5817	17.7736	1.08944	0.812617	0.564212	0.106914	0.29561	0.365298	0.863707	0.5	1
Serpinb8	21.4621	10.0507	16.163	13.7728	10.7761	11.8485	12.7514	16.5302	-1.0945	-0.409096	-0.639969	-0.993956	-0.857087	-0.751136	-0.376687	0.5	1
Ccdc85b	9.16955	19.614	19.2029	12.974	12.703	11.5923	12.7238	13.854	1.09696	1.0664	0.500701	0.470246	0.338244	0.472607	0.59538	0.5	1
Wdr33	10.0162	21.4475	16.1596	14.1783	13.1841	12.2105	10.8667	11.8669	1.09847	0.690056	0.501349	0.396464	0.285787	0.117579	0.244608	0.5	1
Sssca1	14.7143	6.58781	8.02211	8.99023	14.8195	14.0782	17.2832	9.85307	-1.15935	-0.875165	-0.710789	0.0102779	-0.063756	0.232151	-0.578574	0.5	1
Dgcr2	12.7121	5.78132	7.02665	12.04	16.6382	16.696	14.3492	13.3779	-1.13673	-0.855293	-0.078367	0.388297	0.3933	0.174768	0.0736493	0.5	1
Spire1	5.88368	14.245	13.6689	11.3652	9.15033	7.78135	4.62024	6.03834	1.27566	1.21611	0.949832	0.637105	0.403302	-0.348751	0.0374332	0.5	1
Tars	12.0555	5.40346	6.07507	12.4475	16.351	14.6169	12.7724	10.8338	-1.15774	-0.988719	0.0461645	0.439687	0.277946	0.0833382	-0.154152	0.5	1
Mrpl45	10.8821	22.2845	19.5516	14.8183	13.4086	14.1	13.5295	11.5683	1.03408	0.84533	0.445423	0.301202	0.373738	0.314152	0.0882199	0.5	1
Gatad2b	8.75091	20.097	12.6721	8.28238	7.47586	8.98016	6.75997	7.79849	1.19948	0.534151	-0.0793877	-0.227193	0.0373081	-0.372416	-0.166238	0.5	1
Polg	11.8782	5.06687	5.8073	8.10596	11.1154	12.21	11.6799	10.5548	-1.22915	-1.03238	-0.551261	-0.0957564	0.039747	-0.0242883	-0.170417	0.5	1
Dgka	8.45623	18.8469	13.9786	10.3944	6.81555	8.01077	7.87667	11.8557	1.15624	0.725133	0.29772	-0.311185	-0.0780737	-0.102429	0.487494	0.5	1
Hscb	10.531	22.9999	18.8168	12.7194	5.29946	5.14116	6.50409	9.70429	1.12699	0.837379	0.272388	-0.990725	-1.03448	-0.695223	-0.117948	0.5	1
Ptpn18	6.3453	15.3243	13.9903	11.2739	8.08881	5.98309	4.42109	3.14211	1.27206	1.14067	0.829226	0.350239	-0.0847976	-0.521286	-1.01395	0.5	1
Zfp395	9.95294	25.273	15.1121	2.74555	1.05776	1.55156	2.07929	3.30794	1.3444	0.60251	-1.85803	-3.23411	-2.6814	-2.25903	-1.58919	0.5	1
Wbscr22	16.1302	7.74236	8.09511	12.167	12.966	15.7161	18.3712	14.3175	-1.05892	-0.994642	-0.406791	-0.315031	-0.0375211	0.187682	-0.171985	0.5	1
Kctd6	6.09772	14.9248	11.4757	5.93662	6.35144	6.83662	8.10111	6.26091	1.29137	0.91224	-0.0386281	0.0588138	0.165013	0.40985	0.0381025	0.5	1
Nolc1	10.8024	4.55163	6.57834	13.7099	12.2177	10.3759	7.58119	5.17464	-1.2469	-0.715556	0.343866	0.177621	-0.0581154	-0.510856	-1.06182	0.5	1
Pih1d1	16.1757	7.81389	8.06545	9.80047	10.7915	13.1426	18.8005	16.3527	-1.04972	-1.004	-0.722905	-0.583933	-0.299577	0.216943	0.0157007	0.5	1
Dse	10.1295	4.83153	9.6396	15.2542	17.3953	16.4574	11.3268	10.5381	-1.06801	-0.0715178	0.590644	0.780135	0.700173	0.161177	0.0570518	0.5	1
Pld2	12.4334	5.83117	11.2022	13.7626	12.5209	10.5786	11.7998	11.1744	-1.09236	-0.150439	0.146532	0.0101174	-0.233072	-0.0754585	-0.154023	0.5	1
E430025E21Rik	15.7243	7.83042	8.36626	12.7097	17.8131	17.1403	14.329	15.4933	-1.00583	-0.910341	-0.307066	0.179943	0.124397	-0.134058	-0.0213513	0.5	1
Crls1	9.77069	4.12769	4.28774	9.23172	12.3105	10.9496	7.76052	6.62122	-1.24313	-1.18824	-0.081861	0.333357	0.164346	-0.332307	-0.561363	0.5	1
Ino80c	9.20748	3.93581	4.64801	6.76954	9.4537	11.2901	11.4888	9.89771	-1.22615	-0.986193	-0.443749	0.0380727	0.29418	0.31935	0.104288	0.5	1
2810408M09Rik	8.46813	3.48309	3.87397	10.0062	10.3986	9.52469	7.84951	7.21872	-1.28168	-1.12823	0.240779	0.296274	0.169629	-0.109441	-0.2303	0.5	1
Xpa	10.2298	21.4128	16.7565	8.01621	5.61282	7.62023	12.8604	8.6305	1.0657	0.711943	-0.351786	-0.86598	-0.424871	0.330158	-0.245262	0.5	1
Exosc9	10.6099	4.89823	5.18875	8.67488	11.7585	14.7368	14.519	11.1889	-1.11508	-1.03195	-0.290495	0.148293	0.474012	0.452531	0.0766572	0.5	1
Ece2	10.4279	4.67116	5.34583	10.5038	12.3352	12.0948	11.4381	7.57376	-1.1586	-0.963963	0.0104627	0.242332	0.213938	0.133399	-0.461367	0.5	1
Ppp1r8	10.5886	4.88799	4.94341	9.11529	12.5541	12.8813	14.4041	11.5212	-1.1152	-1.09893	-0.216151	0.245647	0.282766	0.443968	0.121779	0.5	1
Sorl1	8.58597	18.2286	16.5161	10.4728	9.53869	8.3101	4.58941	4.6176	1.08615	0.94382	0.286594	0.15181	-0.0471153	-0.903672	-0.894838	0.5	1
Noc4l	6.85797	2.86958	3.34332	6.64803	10.054	10.3717	10.7952	7.64057	-1.25694	-1.0365	-0.0448547	0.551916	0.596799	0.654536	0.155899	0.5	1
Kdm5b	8.08428	18.2637	11.4427	4.96728	4.86778	5.27185	5.002	6.81691	1.17579	0.501236	-0.702663	-0.731855	-0.61681	-0.692614	-0.246001	0.5	1
Trmt6	7.26815	3.19162	3.55521	7.59831	10.7525	12.0527	9.238	6.18379	-1.1873	-1.03165	0.0640904	0.565012	0.729696	0.345992	-0.233097	0.5	1
Tssc1	7.08942	3.30721	3.77233	9.30933	11.2511	12.1135	12.9747	9.92938	-1.10005	-0.910212	0.39301	0.666327	0.772876	0.871962	0.486036	0.5	1
Sesn2	9.74609	20.7016	15.7468	6.05846	4.81815	2.9639	3.85566	5.78664	1.08685	0.692163	-0.685872	-1.01634	-1.71733	-1.33785	-0.752098	0.5	1
Eif2c2	7.79514	16.0603	12.1089	9.39888	9.73376	8.56636	5.09867	4.76129	1.04285	0.635421	0.269914	0.320422	0.136107	-0.612454	-0.711222	0.5	1
Vav3	13.2062	6.22944	6.69224	7.83954	10.2777	7.31693	6.85542	8.72934	-1.08404	-0.980654	-0.752374	-0.361698	-0.851905	-0.945898	-0.597271	0.5	1
Phf21a	9.38684	19.5967	14.0067	4.30371	3.25216	4.31273	6.28954	8.57355	1.0619	0.577406	-1.12506	-1.52924	-1.12204	-0.577685	-0.130747	0.5	1
Hist1h2bk	5.79327	12.3806	12.03	8.01618	9.06523	5.62872	6.4473	5.70015	1.09563	1.05419	0.468537	0.645966	-0.041571	0.154317	-0.023378	0.5	1
Rlf	6.3934	13.2643	9.55054	10.1098	9.84786	8.40282	6.0339	7.0588	1.05289	0.578999	0.661099	0.623227	0.39429	-0.0834926	0.14284	0.5	1
Ipo4	10.6609	5.2381	5.78073	9.22162	10.9975	11.8712	9.59559	6.7332	-1.02521	-0.883006	-0.209237	0.0448464	0.155137	-0.151886	-0.662965	0.5	1
Bpnt1	10.999	5.33828	5.74548	6.35052	7.00127	6.82833	8.86528	11.2166	-1.04293	-0.936873	-0.792426	-0.651684	-0.687768	-0.311134	0.0282631	0.5	1
Ero1lb	5.94778	12.5559	11.3211	8.16982	5.16	4.55894	3.52032	4.32604	1.07794	0.928591	0.457953	-0.20498	-0.383653	-0.756645	-0.459304	0.5	1
Klhl24	7.73576	15.5257	11.0234	5.88164	6.78481	6.18481	3.29904	5.11234	1.00504	0.510954	-0.395325	-0.189235	-0.322814	-1.2295	-0.597559	0.5	1
Il1b	73.5532	2299.06	5837.62	5712.02	3018.92	2396.63	1817.88	1456.62	4.96611	6.31045	6.27907	5.3591	5.02608	4.62733	4.30769	1	1
Cxcl2	117.376	3026.87	8231.98	7890.56	3982.52	2260.87	1750.17	1134.73	4.68862	6.13203	6.07092	5.08447	4.26767	3.89829	3.27314	1	1
Il1a	8.8393	341.905	1577.54	1514.27	756.531	643.272	372.544	282.374	5.27352	7.47953	7.42047	6.41932	6.18535	5.39733	4.99753	1	1
Tnf	26.1063	1102.75	2987.82	1705.41	608.816	439.991	442.372	233.925	5.40056	6.83855	6.02958	4.54354	4.075	4.08279	3.16358	1	1
Nfkbiz	4.23198	467.946	760.076	257.114	97.7756	65.3618	40.7679	28.3432	6.78887	7.48867	5.92493	4.53007	3.94904	3.26803	2.7436	1	1
Ccrl2	6.73415	351.548	548.763	253.909	178.262	170.833	144.638	76.5627	5.70608	6.34854	5.23667	4.72636	4.66495	4.42481	3.50707	1	1
Nfkbia	75.3481	1383	1488.92	1204.69	803.718	649.607	652.413	495.108	4.19809	4.30455	3.99895	3.41505	3.10792	3.11414	2.7161	1	1
Ereg	0.662721	47.2962	137.221	100.724	38.628	15.8206	2.89294	1.72476	6.15718	7.69388	7.24779	5.8651	4.57726	2.12606	1.37992	1	1
Tnfsf9	10.9683	227.231	565.552	160.498	46.1882	30.9382	30.7622	23.479	4.37275	5.68825	3.87114	2.07418	1.49605	1.48782	1.09803	1	1
Tnfaip3	23.3609	378.193	653.766	393.075	211.56	165.673	108.541	81.5432	4.01695	4.80661	4.07264	3.1789	2.82617	2.21607	1.80347	1	1
Areg	1.87399	59.2514	198.927	82.6429	7.75071	3.88667	1.61938	1.33295	4.98266	6.72998	5.46271	2.04822	1.05242	-0.210672	-0.491491	1	1
Flrt3	3.62	44.7177	201.664	123.65	50.7485	34.1995	17.6901	10.8289	3.62678	5.79982	5.09413	3.8093	3.23991	2.28888	1.58083	1	1
Phlda1	30.4121	341.959	500.658	236.668	184.477	159.794	145.877	89.0361	3.49111	4.04111	2.96015	2.60072	2.3935	2.26204	1.54974	1	1
Csrnp1	6.01717	130.739	215.149	51.9488	37.5759	33.7725	27.5258	18.4366	4.44146	5.16011	3.10993	2.64265	2.48869	2.19363	1.61542	1	1
Gem	1.5554	54.368	95.2306	21.0569	4.99735	4.87476	4.98119	7.48263	5.1274	5.93607	3.75894	1.68388	1.64805	1.6792	2.26626	1	1
Nlrp3	28.0047	117.525	344.048	301.617	171.281	143.112	152.05	97.8489	2.06923	3.61887	3.42898	2.61262	2.3534	2.4408	1.80489	1	1
Errfi1	12.5083	108.506	223.736	64.2533	44.0325	30.8491	13.8696	13.4817	3.11682	4.16084	2.36088	1.81568	1.30234	0.14904	0.108117	1	1
Ets2	23.3085	133.464	259.681	193.914	129.201	98.619	72.856	54.927	2.51752	3.47781	3.05649	2.47069	2.08101	1.64419	1.23666	1	1
Pim3	15.5833	165.135	202.019	89.5645	49.8335	31.6806	32.5224	32.4151	3.40557	3.69642	2.52293	1.67712	1.0236	1.06143	1.05667	1	1
Maff	12.6338	94.6163	178.01	140.453	46.9294	20.3372	16.1692	13.8959	2.9048	3.8166	3.47473	1.8932	0.686832	0.35596	0.137371	1	1
Cited2	26.1841	181.878	275.551	67.7386	49.9568	52.305	38.2171	29.5663	2.79621	3.39556	1.37129	0.93199	0.998258	0.545527	0.175263	1	1
Cflar	14.4251	43.7195	141.852	138.295	108.784	103.194	92.2555	74.8692	1.5997	3.29773	3.2611	2.91481	2.83871	2.67705	2.37579	1	1
Pnrc1	51.6137	265.075	334.053	151.571	86.1326	70.3455	79.8376	74.1856	2.36057	2.69425	1.55417	0.738805	0.446704	0.629314	0.523385	1	1
Arg2	10.1215	54.1048	108.429	104.454	51.9226	24.5342	14.0644	12.1867	2.41833	3.42126	3.36737	2.35894	1.27737	0.474625	0.267884	1	1
Mdm2	44.136	124.424	298.393	129.817	84.3384	79.2643	79.8241	67.2728	1.49524	2.75719	1.55645	0.934234	0.844715	0.854868	0.608067	1	1
Cd14	573.688	1651.2	1957.67	1926.16	1755.46	1623.11	1460.55	1462.4	1.52518	1.7708	1.74739	1.61351	1.50042	1.34817	1.35	1	1
Dusp5	17.6667	124.073	150.43	47.6001	28.7394	28.748	25.6977	20.2701	2.81208	3.08999	1.42993	0.701997	0.702429	0.540607	0.198321	1	1
Il1r2	21.7445	122.576	142.859	109.123	78.4403	67.0391	43.2032	42.4166	2.49495	2.71587	2.32723	1.85094	1.62435	0.990488	0.963978	1	1
Tgif1	44.2214	180.433	239.026	113.307	76.4475	72.9461	86.824	78.5135	2.02865	2.43435	1.35742	0.789725	0.722086	0.973349	0.828196	1	1
Plk2	35.396	140.515	199.066	89.3898	70.9752	58.9653	55.147	38.5449	1.98907	2.49159	1.33652	1.00373	0.73628	0.639696	0.122954	1	1
Dusp6	49.0129	13.238	4.60595	6.22152	21.0554	30.9195	38.7363	43.0929	-1.88848	-3.41159	-2.97782	-1.21897	-0.664645	-0.339475	-0.185711	1	1
Atf4	77.5068	327.348	332.132	242.77	142.744	103.329	94.7844	89.7897	2.07843	2.09936	1.6472	0.881035	0.41485	0.290327	0.212227	1	1
Malt1	32.5442	81.0955	158.529	151.368	112.895	109.182	109.769	118.901	1.31722	2.28427	2.21759	1.79451	1.74626	1.754	1.86929	1	1
Cish	5.03882	40.7682	50.0865	38.7812	25.6993	17.3346	9.94969	8.97422	3.01629	3.31326	2.9442	2.35057	1.7825	0.981566	0.832701	1	1
Serpine1	6.18627	35.1625	51.4869	35.5565	22.219	23.3016	25.1836	32.4934	2.5069	3.05706	2.52297	1.84465	1.91329	2.02534	2.39301	1	1
Chka	9.72714	35.2193	84.3167	34.9374	14.3161	9.26628	8.13904	9.3598	1.85628	3.11573	1.84468	0.557551	-0.0700254	-0.257157	-0.055538	1	1
Trem1	14.6249	68.4392	98.2644	63.1019	30.816	19.8467	9.20266	8.20743	2.2264	2.74824	2.10926	1.07525	0.440472	-0.668304	-0.833424	1	1
Kdm6b	10.1485	32.7421	79.454	40.9603	20.8333	16.1133	15.0169	16.1087	1.68988	2.96885	2.01296	1.03762	0.666985	0.565321	0.666574	1	1
F3	8.02888	36.4662	69.1575	21.5057	19.3327	22.1957	12.8339	6.2876	2.18329	3.10662	1.42145	1.26777	1.46701	0.676689	-0.352689	1	1
Rbm7	29.824	70.8401	141.281	124.59	77.9493	56.5479	41.6108	42.6069	1.24809	2.24402	2.06264	1.38606	0.923	0.480484	0.514613	1	1
Rel	6.51957	29.1663	51.7112	36.2544	26.503	24.2754	13.0114	10.4727	2.16145	2.98763	2.47531	2.02331	1.89665	0.996927	0.683785	1	1
Irf4	3.58927	26.6392	41.5473	15.4436	9.70081	7.70444	4.80792	6.08211	2.89179	3.53299	2.10525	1.43441	1.102	0.421722	0.760881	1	1
Tnfaip6	0.538918	11.7156	18.1845	11.1669	4.06699	2.76481	1.19091	1.01073	4.44222	5.0765	4.37302	2.91582	2.35904	1.14393	0.90726	1	1
Skil	18.0543	50.4411	100.334	40.2297	29.3291	32.399	30.3626	33.6319	1.48226	2.4744	1.15592	0.69999	0.843607	0.749953	0.897488	1	1
Id2	374.04	727.323	1012.13	631.286	333.262	304.188	418.633	461.342	0.959404	1.43613	0.755101	-0.166536	-0.298229	0.162493	0.302644	1	1
Wsb1	54.8807	117.227	210.005	133.633	99.3696	77.0664	57.1834	55.9706	1.09493	1.93605	1.28391	0.856506	0.489803	0.0592975	0.0283703	1	1
Lmnb1	2.31347	25.2366	30.5409	16.0112	4.53559	3.45316	3.52548	2.4261	3.44739	3.72261	2.79095	0.971232	0.577859	0.607761	0.0685806	1	1
Pgf	3.09425	26.5925	33.3855	21.244	6.28802	4.28541	3.61467	4.931	3.10336	3.43156	2.77939	1.02302	0.469843	0.224274	0.67229	1	1
Btg1	181.661	333.899	519.361	507.484	255.06	219.182	170.472	179.62	0.878163	1.51549	1.48211	0.489588	0.270881	-0.0917139	-0.0163007	1	1
Prdm1	5.77698	21.9657	53.2485	11.5939	4.40194	6.6409	6.57912	6.29971	1.92687	3.20435	1.00498	-0.392176	0.201063	0.187579	0.12497	1	1
Klf6	46.3622	149.989	174.593	73.7876	64.9649	69.554	53.0899	43.5196	1.69384	1.91297	0.670429	0.486711	0.585184	0.195488	-0.0912837	1	1
Moap1	15.3658	55.4696	69.4909	45.3783	32.9535	30.5284	32.1809	23.1735	1.85197	2.1771	1.56228	1.10071	0.990429	1.06648	0.592753	1	1
Bhlhe40	90.4999	222.231	270.601	182.064	105.39	100.014	94.6902	105.332	1.29607	1.58018	1.00846	0.21975	0.144214	0.0652989	0.218956	1	1
Mki67	0.787708	4.44647	16.6327	13.2918	5.22106	2.61668	1.33762	1.57113	2.49693	4.40022	4.07673	2.72861	1.732	0.763935	0.99607	1	1
Rnf19b	34.7725	59.1958	113.703	98.4823	80.0845	90.3705	107.56	86.8043	0.767548	1.70925	1.50192	1.20358	1.37791	1.62912	1.31982	1	1
Ccng2	20.1116	59.1434	82.6083	44.5862	33.188	30.2114	21.9627	27.3337	1.55619	2.03826	1.14857	0.722634	0.587065	0.127028	0.442653	1	1
Rnd3	7.15547	30.2533	40.5111	20.4751	24.9386	20.8869	9.18908	4.98199	2.07997	2.5012	1.51675	1.80126	1.54548	0.360874	-0.522324	1	1
Hist4h4	20.8101	66.0819	81.1501	59.5977	52.4509	32.09	31.5018	12.4675	1.66697	1.96331	1.51797	1.33368	0.62484	0.59815	-0.739112	1	1
Nfkbid	16.5318	67.9777	71.1894	42.8188	20.2516	16.4101	18.9362	17.6556	2.03982	2.10642	1.373	0.292792	-0.0106598	0.195903	0.094882	1	1
Slc20a1	32.2428	102.118	115.375	69.0087	34.1523	34.7767	23.7287	24.2354	1.66319	1.83928	1.0978	0.0830057	0.109144	-0.442344	-0.411861	1	1
Insig1	12.869	53.4756	59.0107	30.5744	18.3101	19.5169	15.4842	17.2122	2.05498	2.19708	1.24842	0.50874	0.600824	0.266897	0.419532	1	1
Sh2b2	7.05412	18.1234	41.086	29.5411	14.5212	8.28794	8.05479	11.942	1.36132	2.54211	2.06619	1.04162	0.232547	0.191381	0.759506	1	1
Irs2	3.8385	25.603	31.3557	7.68647	6.39338	4.43168	3.168	3.59203	2.7377	3.03011	1.00178	0.736036	0.207311	-0.27697	-0.0957432	1	1
Dnajb9	21.4466	62.3751	78.4203	60.706	49.688	36.0037	19.9009	24.0882	1.54022	1.87048	1.50109	1.21215	0.747396	-0.107915	0.167578	1	1
H2-Aa	419.502	857.852	883.327	824.354	696.365	660.644	588.457	535.525	1.03205	1.07427	0.974586	0.731166	0.655195	0.488259	0.352276	1	1
Ddx5	178.656	294.017	422.684	401.456	294.666	270.142	193.345	196.101	0.718715	1.2424	1.16806	0.721896	0.596534	0.113993	0.134413	1	1
Tnip3	13.5391	23.5516	61.2334	29.971	22.8111	21.6609	12.3646	13.7695	0.798693	2.17719	1.14644	0.752604	0.677961	-0.130916	0.0243443	1	1
Nanog	1.96038	15.2227	16.2757	14.7271	8.25189	6.27554	8.70881	4.23706	2.95702	3.05351	2.90927	2.07359	1.67861	2.15134	1.11193	1	1
Adm	3.78906	23.3551	25.6452	15.0405	8.6428	7.45623	4.46236	4.36656	2.62383	2.75878	1.98894	1.18966	0.976606	0.235967	0.204657	1	1
Fam46c	1.33618	10.7716	13.7226	7.36113	6.39287	6.11091	7.2671	6.59648	3.01105	3.36037	2.46181	2.25835	2.19327	2.44327	2.30358	1	1
Dusp2	0.842185	6.01054	11.9568	10.1769	6.9737	4.43245	3.05281	2.30616	2.83529	3.82755	3.59502	3.04972	2.3959	1.85793	1.45328	1	1
Gtf2b	30.3093	41.3716	96.339	80.0913	46.2473	42.3269	43.3919	35.1415	0.44888	1.66836	1.40189	0.609609	0.481814	0.517665	0.213415	1	1
Snx18	37.9958	77.5708	108.144	104.43	74.5958	67.0063	57.8028	56.9889	1.02967	1.50904	1.45862	0.973254	0.818457	0.605299	0.584841	1	1
H2-Eb1	140.844	299.6	315.515	302.115	247.623	230.863	218.625	184.85	1.08894	1.16361	1.101	0.814047	0.712939	0.63436	0.392257	1	1
Pgd	704.971	365.901	348.591	383.781	453.632	496.535	818.452	665.204	-0.946111	-1.01603	-0.877281	-0.636041	-0.505668	0.215334	-0.0837671	1	1
Gclm	251.572	114.663	110.024	134.656	188.572	215.096	313.379	283.722	-1.13357	-1.19315	-0.901693	-0.415856	-0.225991	0.316937	0.173507	1	1
Brd2	55.7739	103.82	142.277	130.504	90.5949	88.1508	127.819	96.7382	0.896422	1.35104	1.22643	0.69984	0.660384	1.19644	0.794496	1	1
Lilrb4	308.223	359.145	622.99	556.846	517.304	478.103	455.128	388.277	0.220592	1.01523	0.853304	0.747038	0.633347	0.562298	0.333112	1	1
Pcf11	8.34321	20.538	41.3406	15.7919	9.43333	8.43184	7.12576	7.17211	1.29962	2.30888	0.92051	0.177165	0.0152449	-0.227559	-0.218205	1	1
Il10ra	23.8168	60.0093	73.569	49.9758	40.5981	39.8551	39.6576	35.0968	1.33321	1.62712	1.06925	0.769433	0.742785	0.735618	0.55936	1	1
Ppp1r10	15.7935	45.8885	55.3594	37.7177	29.4161	24.3822	20.5008	11.0523	1.5388	1.8095	1.25591	0.897275	0.626497	0.376349	-0.514984	1	1
Sgms1	15.8425	17.6216	63.5818	22.5293	8.3983	13.6885	13.6837	15.7371	0.153545	2.00481	0.508002	-0.915631	-0.210836	-0.211342	-0.00963031	1	1
Gdf15	1.56888	11.2736	13.7272	13.1568	6.2534	3.86005	3.8492	2.25116	2.84514	3.12923	3.068	1.99491	1.29888	1.29482	0.520934	1	1
Pik3r1	7.83003	14.4036	34.6748	27.6269	14.3047	12.2001	8.33797	10.2352	0.87934	2.1468	1.81898	0.8694	0.639803	0.0906783	0.38645	1	1
Dnajb1	14.8605	45.9885	50.7186	30.3853	21.6089	19.1846	21.559	23.8198	1.62979	1.77103	1.03189	0.540143	0.368466	0.536808	0.680679	1	1
Rapgef2	5.45424	8.64307	24.6246	12.1537	13.3037	20.8215	18.767	14.992	0.664166	2.17465	1.15595	1.28638	1.93262	1.78275	1.45874	1	1
Apbb3	10.1287	24.3234	43.3975	20.2118	8.15359	7.58713	7.21449	8.92647	1.2639	2.09916	0.996749	-0.312942	-0.416823	-0.48948	-0.182287	1	1
Sra1	55.6496	117.011	133.876	92.789	83.3811	79.2365	93.5568	86.3052	1.0722	1.26645	0.737582	0.583349	0.509794	0.749471	0.633076	1	1
Arhgef3	4.89878	15.1224	21.7241	18.6069	14.5565	15.2627	11.0008	11.0691	1.62619	2.1488	1.92534	1.57117	1.63952	1.16711	1.17604	1	1
Dusp4	4.00925	8.21996	19.5894	15.1353	10.306	9.86554	10.9259	11.3077	1.0358	2.28867	1.91651	1.36208	1.29907	1.44635	1.4959	1	1
Litaf	155.544	280.357	314.35	298.367	261.386	212.971	144.615	129.204	0.849942	1.01505	0.939765	0.748859	0.453334	-0.105106	-0.267672	1	1
Rnf19a	12.1482	27.4511	41.5988	31.3545	23.1996	16.4711	10.7681	12.6589	1.17612	1.7758	1.36793	0.933357	0.439194	-0.173979	0.0594095	1	1
Ramp3	45.019	84.6697	110.398	93.059	60.2053	53.8541	53.8311	53.2776	0.911312	1.29411	1.04761	0.419356	0.258522	0.257906	0.242995	1	1
Fbxo30	5.41357	13.1355	24.9594	17.0972	11.8828	9.19857	6.64633	7.5224	1.27882	2.20493	1.65911	1.13422	0.764829	0.295978	0.474613	1	1
Gabpb1	8.4409	16.771	30.4881	30.0401	20.3871	17.503	12.0141	10.542	0.9905	1.85278	1.83142	1.27219	1.05213	0.50926	0.32068	1	1
Clcf1	11.9188	25.7173	38.7597	28.6348	22.4095	19.6011	19.0748	15.5757	1.1095	1.70132	1.26453	0.910871	0.717696	0.678429	0.386058	1	1
Dnajb4	18.1964	44.9928	53.4357	18.4335	16.82	23.6064	30.5214	36.5818	1.30604	1.55415	0.018677	-0.113475	0.375525	0.746168	1.00747	1	1
Rbm39	64.7575	114.293	143.54	111.592	95.5848	84.5641	63.9807	69.9416	0.819618	1.14833	0.785114	0.561734	0.384998	-0.0174105	0.111104	1	1
Osbpl9	47.2198	107.897	115.515	69.5269	26.9765	21.4553	19.2719	29.5198	1.19219	1.29062	0.558179	-0.807689	-1.13806	-1.29289	-0.677709	1	1
March7	14.4391	41.6129	43.8499	28.6807	22.996	19.8718	11.8336	13.9787	1.52705	1.60259	0.990099	0.671402	0.460742	-0.287092	-0.0467506	1	1
Tpd52	115.755	222.911	231.713	192.493	175.378	151.842	112.212	110.684	0.945393	1.00126	0.733731	0.599393	0.391496	-0.0448475	-0.0646278	1	1
Fabp4	30.7061	52.5897	77.4797	70.7215	39.7303	22.8529	30.375	40.2371	0.776255	1.33529	1.20362	0.371714	-0.426148	-0.0156409	0.390001	1	1
Klf4	4.20583	21.4613	22.4024	6.25182	2.71356	2.59365	2.64228	3.23996	2.35128	2.41319	0.571886	-0.632204	-0.697407	-0.670607	-0.376415	1	1
Fnip1	8.78612	28.1041	31.1293	18.9319	13.113	10.6031	6.49909	7.63126	1.67748	1.82498	1.10752	0.5777	0.271188	-0.434988	-0.203305	1	1
Tob1	8.28355	30.3423	31.0922	15.0058	6.18525	4.7155	3.81619	4.87203	1.87301	1.90823	0.857199	-0.421417	-0.812838	-1.11812	-0.765726	1	1
Ptpn2	14.867	33.0634	40.8828	31.4006	28.72	29.3307	25.834	20.6275	1.15312	1.45938	1.07868	0.949942	0.980298	0.797157	0.472455	1	1
Zfand5	31.9364	62.7468	74.9779	38.247	47.2021	57.3982	51.139	48.8677	0.97434	1.23126	0.260145	0.563649	0.845804	0.679222	0.61368	1	1
Frmd6	2.89822	5.93927	16.8323	13.9985	5.16079	3.83554	1.97213	3.10882	1.03512	2.53799	2.27203	0.832425	0.404263	-0.555412	0.1012	1	1
Gusb	68.7593	30.2028	27.578	29.4098	28.8452	31.9207	36.2103	48.2206	-1.18687	-1.31804	-1.22526	-1.25322	-1.10706	-0.925155	-0.511905	1	1
Crem	8.2042	24.46	27.6565	19.8221	11.953	10.7595	10.4585	7.97954	1.57599	1.75318	1.27268	0.542938	0.391176	0.350241	-0.0400571	1	1
Ccrn4l	11.1466	8.98672	34.5441	25.1114	15.7051	17.1499	18.7794	16.4703	-0.310737	1.63184	1.17174	0.494629	0.621596	0.752547	0.563263	1	1
Ndel1	26.1941	46.1311	63.117	57.1093	38.8236	33.2748	30.6567	29.4515	0.816498	1.26879	1.12448	0.567692	0.345188	0.226961	0.169099	1	1
Ap4b1	9.98638	8.73748	32.4982	25.9465	13.9384	12.1266	8.89246	9.96462	-0.192745	1.70233	1.37751	0.481031	0.280141	-0.167379	-0.00314702	1	1
Tbk1	20.2459	32.6177	49.0356	37.0908	35.6669	44.103	40.7183	41.9819	0.688025	1.2762	0.873432	0.816956	1.12325	1.00805	1.05214	1	1
Gltscr2	56.6872	108.745	118.357	101.605	76.6943	61.1413	56.6422	41.2266	0.939854	1.06205	0.841876	0.436096	0.109124	-0.00114571	-0.459448	1	1
Ptgir	20.3047	14.1937	6.52675	9.77369	16.0644	19.0781	22.6862	25.2338	-0.516563	-1.63738	-1.05484	-0.337947	-0.0898962	0.160001	0.313544	1	1
Cdc42ep4	6.57784	10.1786	23.7789	20.9666	7.51071	6.34165	9.6635	11.2855	0.629853	1.854	1.67241	0.191335	-0.0527557	0.554932	0.778785	1	1
Hmgb2	18.2225	46.1294	48.6402	28.0238	18.1219	14.2228	16.0079	15.6003	1.33997	1.41643	0.620932	-0.00798668	-0.357515	-0.186937	-0.224147	1	1
Hexim1	15.1543	38.8229	43.5406	19.0018	10.5959	9.75513	10.8484	14.4571	1.35718	1.52263	0.326409	-0.516221	-0.635494	-0.482245	-0.067949	1	1
Gal	3.21815	13.0039	13.3349	10.249	11.0248	7.64005	9.03134	6.73821	2.01464	2.0509	1.67118	1.77645	1.24735	1.48871	1.06613	1	1
Hist1h2bg	46.1616	95.1457	97.068	85.4393	62.934	46.7097	62.1005	45.5113	1.04345	1.0723	0.888207	0.447146	0.0170289	0.427912	-0.0204684	1	1
G6pdx	90.3937	46.0723	43.4421	49.6142	56.5188	63.1339	84.1774	114.983	-0.972323	-1.05713	-0.865469	-0.677491	-0.517807	-0.102789	0.347126	1	1
Hbp1	37.8705	63.4493	82.1911	59.3813	52.2923	48.3503	39.1104	49.2653	0.74453	1.11791	0.648934	0.465524	0.35245	0.0464778	0.379497	1	1
Chd1	9.54634	20.6551	29.2847	17.3597	12.8458	13.4551	10.2966	12.1484	1.11348	1.61713	0.862722	0.428277	0.495133	0.109148	0.347747	1	1
Klf2	8.15735	26.5856	27.4319	8.00403	5.29111	7.09013	9.44106	7.38335	1.70447	1.74968	-0.027374	-0.62453	-0.202288	0.210848	-0.143825	1	1
6430527G18Rik	14.1629	8.36721	3.57844	3.83893	5.47271	8.01933	13.4777	13.5807	-0.759298	-1.98471	-1.88334	-1.37179	-0.820563	-0.0715424	-0.0605589	1	1
Hspa4l	6.60884	21.8339	22.3987	15.1292	7.37242	5.57461	4.63116	9.32006	1.7241	1.76095	1.19487	0.157741	-0.245526	-0.513023	0.495942	1	1
Sh3bp2	39.4641	20.726	17.3281	24.3509	40.2917	47.5846	62.7447	49.6837	-0.929099	-1.18743	-0.696566	0.0299418	0.269954	0.668953	0.332232	1	1
Akt1	95.2453	49.2354	46.3809	60.2539	64.3436	59.9693	69.0871	61.8011	-0.951952	-1.03812	-0.660593	-0.565851	-0.667424	-0.463232	-0.624015	1	1
Prkd3	9.6549	21.2429	30.3917	16.8855	8.10791	7.94706	5.96815	7.38238	1.13765	1.65434	0.806452	-0.251931	-0.28084	-0.693978	-0.387175	1	1
Csrp2	8.25448	15.9846	24.6984	20.0222	13.6695	11.221	12.6781	11.8124	0.953433	1.58117	1.27835	0.727711	0.442952	0.619089	0.517053	1	1
Fes	50.0248	26.1045	21.7221	25.2223	27.8998	34.5484	43.9629	45.3968	-0.938345	-1.20348	-0.987944	-0.842389	-0.534025	-0.186357	-0.140053	1	1
Slc4a2	14.4189	5.12535	4.22003	8.97938	12.4963	14.3553	14.6551	13.356	-1.49224	-1.77264	-0.683273	-0.20646	-0.00637763	0.0234417	-0.110473	1	1
Cenpb	51.0001	25.0841	23.9303	32.6131	47.5815	53.4212	76.5243	61.7873	-1.02373	-1.09166	-0.645048	-0.100099	0.0669123	0.585418	0.27681	1	1
Hbegf	3.01611	10.3913	15.1604	4.64659	4.58497	5.65212	3.14065	1.37967	1.78462	2.32955	0.623483	0.604223	0.906103	0.0583741	-1.12837	1	1
Bid	9.00155	3.76002	2.34342	6.18285	9.1534	10.3596	13.663	11.3358	-1.25943	-1.94156	-0.541901	0.0241343	0.202723	0.602029	0.332641	1	1
Ssfa2	26.0012	46.9686	57.7209	34.9486	30.2591	31.9432	25.0028	24.1389	0.853118	1.15052	0.426656	0.218791	0.296931	-0.0564885	-0.107218	1	1
Nrg1	3.91059	7.0759	17.0616	10.5679	5.30814	4.19179	2.53853	3.59979	0.855527	2.12529	1.43423	0.44082	0.10018	-0.623393	-0.119474	1	1
Herpud1	15.6674	32.7321	38.1103	35.9893	26.9188	16.3929	9.53246	15.0704	1.06294	1.28242	1.1998	0.780848	0.0653053	-0.716845	-0.0560481	1	1
Cyth1	30.9987	60.1753	66.6572	31.9388	29.7274	28.84	33.6161	35.2668	0.956964	1.10455	0.0431024	-0.0604144	-0.104137	0.116945	0.186103	1	1
Ptpn7	24.7814	9.67434	8.73299	13.4617	14.5623	15.1775	17.4944	14.875	-1.35702	-1.50471	-0.880397	-0.767019	-0.707324	-0.502365	-0.736368	1	1
Taok2	13.7102	6.79372	4.24813	7.61068	11.8835	13.84	15.817	13.2992	-1.01298	-1.69035	-0.849152	-0.20629	0.0135943	0.206226	-0.0439102	1	1
Usp16	8.74233	11.6126	25.0474	23.3756	13.5862	12.5552	9.34881	9.78843	0.409601	1.51857	1.41891	0.636052	0.522195	0.0967649	0.16306	1	1
Hnrnph3	6.19484	12.9828	17.389	17.3237	15.6136	14.1992	15.8737	17.2423	1.06746	1.48904	1.48361	1.33366	1.19667	1.3575	1.47681	1	1
Sigmar1	28.1656	11.1412	10.3226	11.8503	12.9046	15.3185	17.826	17.7306	-1.33803	-1.44813	-1.24901	-1.12605	-0.878659	-0.659951	-0.667693	1	1
Sirt1	6.12852	12.319	19.8531	13.1496	10.5164	7.73276	5.76843	5.67349	1.00727	1.69575	1.10141	0.77903	0.335445	-0.08736	-0.111302	1	1
Capn2	37.2288	18.021	16.7379	22.9571	30.2033	33.1257	38.409	39.9934	-1.04674	-1.1533	-0.697479	-0.301713	-0.168468	0.0450253	0.103343	1	1
Slbp	21.2732	31.3787	46.5396	42.3005	35.0706	27.6518	26.4163	23.2061	0.560749	1.12942	0.991638	0.721225	0.378336	0.312391	0.125467	1	1
Oat	31.701	43.2464	64.5824	60.4994	53.36	41.7773	25.6887	25.5993	0.448052	1.02661	0.932392	0.75123	0.398191	-0.303394	-0.308424	1	1
Ssna1	34.8913	20.1276	15.11	16.9363	20.1761	21.4711	31.1677	28.4225	-0.793692	-1.20736	-1.04275	-0.79022	-0.700471	-0.162816	-0.295834	1	1
Dpys	4.68568	9.95274	14.4633	13.0925	12.1762	11.3974	10.7842	6.93588	1.08684	1.62607	1.48241	1.37773	1.28237	1.20259	0.565821	1	1
Plxna1	53.9011	29.5249	26.8452	51.6651	58.4051	46.7698	44.066	39.6426	-0.868383	-1.00565	-0.0611247	0.11578	-0.204737	-0.290649	-0.443263	1	1
Atic	31.4541	14.2818	13.2509	18.8514	20.0259	23.4565	20.5797	16.0331	-1.13907	-1.24716	-0.738576	-0.651381	-0.42326	-0.612026	-0.972195	1	1
Tmem132a	17.7932	31.4075	37.6876	31.4914	31.6171	34.0423	33.2738	26.3644	0.819783	1.08276	0.823632	0.829379	0.936003	0.903061	0.567265	1	1
Maz	41.4872	26.6315	19.3793	26.5765	26.8135	25.7182	32.8004	31.1254	-0.639533	-1.09815	-0.642515	-0.629707	-0.689877	-0.338953	-0.414574	1	1
Rcan1	7.6995	16.6343	22.4318	6.30657	6.41504	9.31884	8.57906	9.45625	1.11132	1.54271	-0.287909	-0.263307	0.275386	0.156055	0.296503	1	1
0610037P05Rik	22.6889	13.0983	9.81842	14.9826	23.7176	25.6399	30.0617	26.9936	-0.792607	-1.20842	-0.598699	0.0639714	0.176404	0.40594	0.250631	1	1
Pdrg1	21.6506	9.69747	8.50199	13.8396	15.4176	16.7904	18.6092	15.8196	-1.15873	-1.34853	-0.645605	-0.489829	-0.36677	-0.218391	-0.452694	1	1
Cbr3	30.3264	16.0716	13.3814	14.1878	18.9795	22.8668	33.3652	25.7795	-0.916061	-1.18035	-1.09592	-0.676132	-0.40732	0.13777	-0.23435	1	1
Dennd4a	8.45805	18.7843	24.5725	13.299	6.94618	5.44348	2.64094	4.31417	1.15113	1.53865	0.652921	-0.284105	-0.635796	-1.67927	-0.971242	1	1
Zfp688	8.5525	4.51753	2.24678	3.66603	5.96921	6.27363	10.2979	10.9115	-0.920812	-1.92849	-1.22213	-0.518806	-0.447046	0.267932	0.351431	1	1
Smarcb1	20.1186	9.0371	8.55159	13.6422	20.66	24.4157	30.8818	22.9916	-1.1546	-1.23427	-0.560454	0.0383103	0.279279	0.618227	0.192577	1	1
Chmp6	14.7165	7.44529	5.58803	9.67158	13.6311	15.0709	20.2458	18.4925	-0.983035	-1.39702	-0.605611	-0.110533	0.034331	0.460188	0.329506	1	1
Rgl2	34.2315	18.7615	16.1043	21.5006	27.3135	28.7749	35.8182	35.0175	-0.867549	-1.08788	-0.670948	-0.32571	-0.250514	0.0653683	0.0327516	1	1
Ncln	26.3529	13.2724	11.2829	12.3034	14.9375	18.4539	27.2498	25.3356	-0.989532	-1.22382	-1.0989	-0.819023	-0.514036	0.0482839	-0.0567957	1	1
Rbm38	5.25049	12.5965	16.7034	11.5909	6.60517	4.03792	5.10013	5.33845	1.2625	1.66962	1.14247	0.331144	-0.37884	-0.041918	0.0239689	1	1
Fgd3	18.0325	12.7037	6.58341	7.11541	7.8956	8.71167	15.7398	14.8454	-0.505351	-1.45369	-1.34158	-1.19148	-1.04958	-0.196182	-0.280583	1	1
Fam110a	5.77036	12.9875	16.4703	10.4606	6.43471	6.76404	11.9208	11.686	1.17039	1.51313	0.858232	0.157214	0.229224	1.04675	1.01805	1	1
Gpbp1	13.5347	28.7105	29.184	28.8602	27.2228	25.7656	21.0003	18.9165	1.08492	1.10851	1.09242	1.00815	0.928783	0.633747	0.482982	1	1
Dot1l	7.76306	15.1672	20.8296	10.7687	8.13842	10.4294	11.1275	10.2209	0.966257	1.42394	0.472147	0.0681233	0.425959	0.519432	0.396825	1	1
Mrpl12	36.4086	19.6569	17.7544	34.4488	37.932	31.7966	31.7507	23.9083	-0.889243	-1.0361	-0.0798255	0.0591362	-0.195407	-0.197491	-0.606768	1	1
Zfand2a	20.9462	36.3616	44.5119	28.8493	19.3151	16.2023	12.9085	16.2201	0.795727	1.0875	0.461848	-0.116959	-0.37049	-0.698367	-0.368906	1	1
Med21	22.6078	27.515	45.2268	39.5087	30.3747	31.7378	35.7094	24.0622	0.283398	1.00036	0.80535	0.42605	0.489382	0.659483	0.0899479	1	1
Bccip	23.1237	11.0204	10.4735	16.6634	23.512	26.2866	31.2362	22.708	-1.0692	-1.14263	-0.472689	0.024025	0.184955	0.433847	-0.0261716	1	1
Rap2b	18.1889	15.5368	38.2792	32.4534	23.6433	22.5919	22.6507	24.9887	-0.227369	1.0735	0.835311	0.378373	0.312747	0.316497	0.458218	1	1
Twf2	40.3927	21.5397	19.8474	20.3078	24.8762	25.7653	38.3478	38.7347	-0.907096	-1.02514	-0.992061	-0.699328	-0.648665	-0.0749508	-0.060468	1	1
Arih2	15.5523	31.8896	33.4187	26.2926	22.0215	20.0266	15.6789	15.7999	1.03596	1.10353	0.757529	0.501785	0.36479	0.0116964	0.0227875	1	1
Dpp3	26.1341	13.1136	12.11	15.7131	19.0864	23.4947	34.569	33.3253	-0.99487	-1.10973	-0.733966	-0.453388	-0.153598	0.403545	0.350684	1	1
Gab1	8.32751	12.9533	24.6717	2.99401	1.8219	4.09835	7.61031	9.27465	0.637363	1.5669	-1.47581	-2.19244	-1.02284	-0.12993	0.155408	1	1
Mpst	10.5683	24.8168	25.1224	18.5677	13.9738	10.9061	9.76943	10.1915	1.23157	1.24923	0.813052	0.402981	0.045392	-0.113397	-0.0523769	1	1
Ikzf1	12.0194	6.90671	4.55628	5.42976	11.4327	16.4918	17.3595	16.2505	-0.799294	-1.39944	-1.1464	-0.0721987	0.456384	0.530361	0.435119	1	1
Commd5	10.6046	5.42228	3.72575	6.57441	9.50524	10.6934	16.039	12.7203	-0.967719	-1.50909	-0.689757	-0.157895	0.0120304	0.596894	0.262442	1	1
Rlim	10.7592	18.0628	24.834	23.3264	16.9956	14.4755	9.21263	10.1361	0.747451	1.20675	1.11639	0.65959	0.428042	-0.223886	-0.0860681	1	1
Plec	24.1659	14.9711	11.2359	20.1257	22.9733	20.6914	24.899	24.7514	-0.690792	-1.10486	-0.263934	-0.0730146	-0.223941	0.0431151	0.0345374	1	1
Trim8	25.6687	17.552	11.9858	15.5011	20.2327	21.6279	26.8737	25.6892	-0.548375	-1.09868	-0.72764	-0.343321	-0.247117	0.0661847	0.00115173	1	1
Lypla1	21.9798	10.4354	9.67766	10.8658	14.5368	18.1332	20.8923	25.939	-1.07469	-1.18345	-1.01638	-0.596469	-0.277545	-0.0732069	0.238945	1	1
0610007P14Rik	16.2803	8.78084	6.30151	8.53794	9.03695	10.804	13.8488	16.4447	-0.890696	-1.36936	-0.931167	-0.849219	-0.591562	-0.233366	0.0144954	1	1
Rab33b	9.41199	20.4604	21.6571	17.7736	14.0654	13.7452	14.6407	11.7514	1.12026	1.20227	0.917164	0.579579	0.546356	0.637413	0.320261	1	1
Bckdhb	16.7341	33.3685	33.8859	25.1241	21.7292	20.7643	23.7083	23.9788	0.995696	1.01789	0.586281	0.376844	0.311314	0.502601	0.518969	1	1
Pts	16.1148	24.0553	34.0741	23.7255	16.9464	14.737	15.0442	15.4418	0.577969	1.08029	0.558052	0.0725925	-0.128943	-0.0991789	-0.0615454	1	1
Orai1	24.5668	16.2389	11.7008	14.6584	19.79	19.7073	28.0253	28.3575	-0.597256	-1.0701	-0.744982	-0.311938	-0.31798	0.19002	0.20702	1	1
Uap1	12.2323	18.388	27.0747	23.3032	12.5186	11.8659	11.0327	14.236	0.588069	1.14625	0.929832	0.0333775	-0.0438742	-0.14891	0.218848	1	1
Atl2	5.39901	14.5043	15.0239	11.7276	7.63138	5.98322	4.76933	4.82455	1.42571	1.47649	1.11914	0.499249	0.148227	-0.178908	-0.162301	1	1
Ankrd52	13.3364	6.89244	5.33346	8.4975	13.4189	14.477	14.1653	12.7911	-0.952283	-1.32223	-0.650259	0.00889713	0.118393	0.0869919	-0.0602289	1	1
Stk35	5.59822	11.1423	15.4025	7.81023	6.96974	7.14546	7.5051	8.00103	0.993007	1.46012	0.480397	0.316137	0.352059	0.422903	0.515218	1	1
Orai3	18.2406	8.06363	7.41698	9.02923	9.1062	10.1988	13.3742	13.9576	-1.17765	-1.29825	-1.01448	-1.00223	-0.838754	-0.447701	-0.386102	1	1
Dclre1c	8.01984	16.14	18.1889	13.7451	13.8709	15.576	15.2411	12.5019	1.009	1.18141	0.777272	0.790416	0.957679	0.926322	0.640502	1	1
Auh	16.3681	34.1287	34.4355	20.2865	8.59059	8.96371	9.93788	15.2948	1.0601	1.07301	0.309633	-0.930058	-0.868719	-0.719877	-0.0978456	1	1
Hras1	19.9203	10.3808	9.33897	14.2462	18.8856	19.5597	25.9983	19.0201	-0.940322	-1.0929	-0.483662	-0.0769528	-0.0263551	0.384178	-0.0667145	1	1
Pycr2	12.9949	7.19977	4.90677	6.06137	7.23371	7.97462	12.4182	11.5813	-0.851923	-1.4051	-1.10023	-0.845138	-0.704458	-0.0654895	-0.166148	1	1
Ndst2	9.52637	6.13474	3.46368	4.51991	8.60735	10.4889	10.223	11.6973	-0.634924	-1.45962	-1.07563	-0.146357	0.138865	0.10182	0.296177	1	1
Tfdp1	22.0427	11.3014	10.2582	12.0918	15.3174	17.5674	19.3348	18.318	-0.963799	-1.10352	-0.866272	-0.52513	-0.3274	-0.189101	-0.267039	1	1
Rbbp6	10.0705	15.8796	22.4044	15.2809	13.8408	12.6169	11.3196	10.3824	0.657039	1.15365	0.601594	0.458792	0.325222	0.168688	0.0440047	1	1
Map3k11	19.9231	11.9568	9.76399	19.8762	24.266	20.7381	23.2851	22.7357	-0.736611	-1.0289	-0.00340018	0.284494	0.0578416	0.224965	0.190517	1	1
Gna15	9.15471	5.52344	3.37938	3.38261	9.4011	13.4457	12.7246	8.88864	-0.728947	-1.43776	-1.43638	0.0383154	0.554559	0.475034	-0.0425515	1	1
Eftud2	19.1686	9.25669	8.96329	12.3309	14.7775	18.6847	21.5281	20.893	-1.05018	-1.09664	-0.636467	-0.375343	-0.0368876	0.167476	0.124275	1	1
Ap1ar	12.8124	6.59391	5.00039	5.69266	9.59174	11.7137	11.9504	10.484	-0.958335	-1.35743	-1.17037	-0.417676	-0.129344	-0.100482	-0.289351	1	1
Rnf220	13.7231	7.1646	5.57866	8.74462	11.2097	12.1023	12.4624	10.3841	-0.937648	-1.29862	-0.650139	-0.291859	-0.181325	-0.139024	-0.40223	1	1
Wars	13.5541	6.2126	6.06279	9.09555	14.6575	19.2502	21.4901	16.4456	-1.12546	-1.16068	-0.575497	0.11291	0.506144	0.664943	0.278972	1	1
Zmpste24	14.1281	6.65508	5.93594	8.84799	11.5309	13.0792	12.4016	15.0355	-1.08604	-1.25102	-0.675146	-0.293062	-0.111293	-0.188041	0.0898054	1	1
Mocs2	16.8554	13.676	8.22312	8.94766	12.6675	20.255	29.7757	33.3156	-0.301565	-1.03545	-0.913629	-0.412079	0.265067	0.820925	0.982987	1	1
Zdhhc12	15.8335	11.4932	7.58388	13.6394	19.0381	18.4368	22.6521	24.7678	-0.4622	-1.06197	-0.2152	0.265909	0.219608	0.516665	0.645486	1	1
Tesk1	14.4352	7.53926	6.50819	8.99103	13.7918	15.9388	20.0259	19.6008	-0.937096	-1.14926	-0.683033	-0.0657803	0.142952	0.472276	0.441321	1	1
Clk2	15.7992	8.49152	7.18575	11.5906	14.9776	15.6465	16.9888	15.144	-0.895757	-1.13664	-0.446896	-0.077045	-0.0140115	0.104732	-0.0611052	1	1
Zfp655	9.25096	17.0299	20.5727	17.6265	13.5215	10.6236	6.18875	6.719	0.880395	1.15306	0.930071	0.54758	0.199598	-0.579955	-0.461357	1	1
Nomo1	22.8456	12.3584	10.578	11.781	11.6462	13.3683	15.0877	13.125	-0.886424	-1.11085	-0.955454	-0.972057	-0.7731	-0.598543	-0.799599	1	1
Sertad2	13.8105	21.0691	27.9384	27.6025	16.832	12.832	10.9139	10.0749	0.609363	1.01648	0.999033	0.285441	-0.10602	-0.339599	-0.455	1	1
Tor1b	17.4627	8.78577	8.44223	12.6665	17.5871	20.438	20.3066	18.4788	-0.991036	-1.04858	-0.463259	0.010241	0.226977	0.217672	0.0815944	1	1
Mogs	17.3272	8.64087	7.48695	9.74096	9.41977	9.48727	11.5687	11.5538	-1.00379	-1.21059	-0.830903	-0.879275	-0.868974	-0.582812	-0.584671	1	1
Rit1	15.8716	10.4126	7.12673	9.85579	11.1645	11.2883	13.7181	14.2188	-0.608117	-1.15514	-0.687404	-0.507529	-0.491619	-0.210367	-0.158648	1	1
Ppil3	15.058	10.3736	6.89894	7.80471	11.879	13.7088	16.242	15.3497	-0.537614	-1.12608	-0.948113	-0.342117	-0.135428	0.109199	0.0276803	1	1
Arhgap17	12.0416	19.683	24.3343	14.5414	12.939	14.2809	14.4033	14.8432	0.708923	1.01496	0.272139	0.103699	0.24606	0.258372	0.301775	1	1
Prdm2	7.53917	11.1777	18.033	8.53909	7.2293	6.98512	7.47975	7.34597	0.568146	1.25816	0.179677	-0.0605497	-0.110121	-0.0114157	-0.0374527	1	1
Nr2c2ap	17.7705	10.1494	8.38007	11.3336	16.1792	14.0018	13.3086	11.7719	-0.80809	-1.08445	-0.648878	-0.135344	-0.343872	-0.417125	-0.594137	1	1
Nlrc4	5.4016	5.20972	13.2447	10.5661	8.15095	7.64514	7.7258	9.89039	-0.052181	1.29396	0.967984	0.593581	0.501156	0.516298	0.872641	1	1
Zdhhc6	14.8517	9.21953	7.40111	11.4544	17.2404	19.8244	21.0528	22.8289	-0.687863	-1.00481	-0.374726	0.215165	0.416649	0.503384	0.620233	1	1
Stap2	5.51568	10.0501	13.1937	11.9285	8.74059	6.90397	6.4489	7.1326	0.865599	1.25824	1.1128	0.664192	0.323887	0.225514	0.370889	1	1
Nde1	14.6493	7.47889	6.91965	10.4289	15.1057	14.3326	15.4224	15.0395	-0.969936	-1.08206	-0.490245	0.0442613	-0.0315314	0.0741956	0.0379249	1	1
Mrps2	8.68018	4.04083	3.45734	8.51478	10.8443	10.2289	8.50307	8.02427	-1.10307	-1.32806	-0.0277557	0.32114	0.236854	-0.0297411	-0.113355	1	1
Med13	6.0691	8.04304	14.292	11.6377	9.40628	9.02506	6.99529	7.10523	0.406258	1.23565	0.939251	0.632142	0.572454	0.204901	0.227399	1	1
Ddx41	16.5597	8.52148	8.09175	12.4786	12.8843	14.8177	18.7419	17.4464	-0.958501	-1.03315	-0.40822	-0.362062	-0.160355	0.178591	0.0752528	1	1
Dtymk	14.3003	9.47185	6.58246	7.56939	10.0789	10.9609	14.2226	13.6747	-0.594327	-1.11935	-0.917796	-0.504707	-0.383679	-0.00786019	-0.0645362	1	1
Prkra	7.11766	15.9552	16.228	10.2402	5.84527	4.78596	5.63529	8.69012	1.16455	1.18901	0.524769	-0.284133	-0.572595	-0.336913	0.287973	1	1
H2-DMb2	7.41054	14.7731	15.3556	14.7995	10.6579	12.1919	10.5964	13.0487	0.995322	1.05111	0.997898	0.524273	0.718272	0.515924	0.816256	1	1
Exosc2	11.4368	16.7554	23.0732	18.0669	11.1348	11.0613	10.1919	6.96338	0.550943	1.01253	0.659666	-0.0386078	-0.0481625	-0.16626	-0.715824	1	1
Nosip	15.4768	10.7994	7.62218	7.94952	10.4873	14.356	18.6528	18.8095	-0.519156	-1.02183	-0.961168	-0.561464	-0.108453	0.269285	0.281354	1	1
Lpin2	9.20667	19.5019	19.529	9.47079	5.92635	7.3958	8.82142	9.86836	1.08286	1.08487	0.0408053	-0.635536	-0.315973	-0.0616685	0.100131	1	1
Ormdl1	14.7396	9.10202	6.72766	7.16485	7.29676	9.77854	11.2023	13.9352	-0.695439	-1.13152	-1.04069	-1.01437	-0.592006	-0.395902	-0.0809637	1	1
Mesdc2	14.3304	8.37475	6.71883	8.24185	10.3914	12.1044	13.1313	12.5743	-0.774961	-1.0928	-0.798039	-0.463689	-0.243547	-0.126069	-0.188601	1	1
Zdhhc7	14.8946	9.27576	7.04788	9.12955	10.3288	11.153	12.1206	12.9704	-0.683252	-1.07953	-0.706174	-0.528117	-0.417358	-0.297328	-0.199566	1	1
P2rx7	14.6529	8.71962	6.87528	7.79981	8.66528	11.3715	12.4276	9.85485	-0.748849	-1.0917	-0.909675	-0.757868	-0.365764	-0.237639	-0.57228	1	1
Hist1h2bf	4.86344	10.2046	11.1851	7.43175	8.11134	6.58787	5.92632	4.70609	1.06917	1.20153	0.611725	0.737963	0.437835	0.285159	-0.0474482	1	1
Fbxo33	6.94215	12.3567	14.1372	11.3642	9.11866	9.58739	8.57472	10.1721	0.831839	1.02604	0.711042	0.393439	0.465756	0.304707	0.551163	1	1
Rabif	10.5567	6.90376	5.04343	8.49578	11.0291	10.4186	10.1719	12.277	-0.612705	-1.06568	-0.313341	0.0631561	-0.0189975	-0.0535697	0.217799	1	1
Dalrd3	8.27266	14.4942	16.8771	12.5872	6.90218	6.03023	6.20168	8.08751	0.809053	1.02864	0.605534	-0.261299	-0.456138	-0.415692	-0.0326557	1	1
Ddx18	13.0221	6.79036	6.47557	11.1419	13.303	13.1666	9.51153	8.75065	-0.939402	-1.00788	-0.224967	0.0307895	0.0159207	-0.453213	-0.5735	1	1
Rufy2	5.22073	8.87403	11.018	10.1648	8.57191	8.10412	8.59025	9.70616	0.765338	1.07754	0.961258	0.715365	0.634404	0.718449	0.894649	1	1
Sike1	10.9998	5.64131	5.38019	7.80566	11.1446	11.7623	11.9153	9.69046	-0.963375	-1.03175	-0.494885	0.0188675	0.0966929	0.115338	-0.18284	1	1
Ube2h	5.4838	10.6517	11.694	10.9119	6.94682	5.75599	5.42445	5.46914	0.957836	1.09252	0.992654	0.341177	0.0698881	-0.0156991	-0.00386196	1	1
Parp2	11.9002	7.1039	5.92836	7.04722	8.27015	10.4876	11.4776	12.1647	-0.744303	-1.00528	-0.75586	-0.525	-0.182301	-0.0521648	0.0317149	1	1
Mtmr9	9.17003	4.57934	4.49538	4.95951	7.7298	11.3598	11.0819	9.51751	-1.00179	-1.02848	-0.886729	-0.246495	0.308939	0.273207	0.0536577	1	1
Dhrs7b	8.5654	5.45909	4.16677	4.32045	4.74068	6.36878	10.0562	10.2835	-0.64986	-1.03959	-0.987339	-0.853427	-0.427504	0.231493	0.263739	1	1
Ccl4	6.34839	64.8095	1214.68	1857.28	1449.51	1054.83	506.8	135.768	3.35174	7.57997	8.19258	7.83496	7.3764	6.31888	4.41861	2	2
Ptgs2	2.51074	253.075	821.887	1018.39	817.554	505.615	168.247	96.6531	6.65531	8.35468	8.66396	8.34706	7.65378	6.06632	5.26663	2	2
Cxcl1	16.6543	630.026	2287.49	2881.66	1479.89	901.973	712.924	493.911	5.24144	7.10173	7.43486	6.47345	5.75912	5.41978	4.89028	2	2
Ccl3	30.1768	401.89	2354.58	3544.36	2746.12	1706.14	794.876	287.006	3.73529	6.28589	6.87594	6.50781	5.82115	4.71922	3.24957	2	2
Il6	1.01435	141.749	388.134	448.915	439.746	389.711	277.046	115.925	7.12664	8.57986	8.78974	8.75997	8.58571	8.09343	6.83649	2	2
Csf3	0.0253762	6.36421	59.1735	84.3051	55.0287	28.5978	15.6341	7.23157	7.97036	11.1873	11.6979	11.0825	10.1382	9.267	8.15469	2	2
Ptx3	27.7137	90.5158	525.125	1480.04	1035.04	920.456	718.091	384.904	1.70757	4.24399	5.73889	5.22294	5.05368	4.6955	3.79583	2	2
Tnfsf15	0.475603	3.39464	42.5509	174.572	156.097	107.005	27.1304	14.2061	2.83543	6.48329	8.51985	8.35847	7.8137	5.83401	4.90061	2	2
Rnd1	1.51963	9.98811	81.3446	189.015	63.1461	24.3138	10.0145	8.92581	2.71649	5.74225	6.95864	5.3769	3.99998	2.7203	2.55426	2	2
Marcksl1	61.2171	239.885	583.156	881.468	847.891	660.56	563.642	412.014	1.97034	3.25188	3.8479	3.79187	3.43168	3.20277	2.75069	2	2
Plek	52.5337	223.273	711.831	799.078	677.647	511.995	213.354	159.23	2.08749	3.76022	3.92702	3.68922	3.28481	2.02193	1.5998	2	2
Inhba	18.9854	83.5824	232.417	406.102	341.819	273.382	143.919	135.302	2.13831	3.61375	4.41888	4.17027	3.84796	2.92229	2.83322	2	2
Wdr92	22.2474	96.8538	327.798	373.587	321.569	236.747	125.646	86.6816	2.12217	3.8811	4.06974	3.85342	3.41164	2.49766	1.96209	2	2
Lif	2.35255	17.5301	89.9173	118.14	31.3209	17.941	12.8258	12.8077	2.89754	5.2563	5.65013	3.73483	2.93096	2.44675	2.44471	2	2
Bcl2a1b	132.374	274.104	739.089	1187.51	1038.86	798.728	606.517	428.444	1.0501	2.48113	3.16525	2.97231	2.59308	2.19593	1.69449	2	2
Bcl2a1d	72.4787	144.002	433.59	729.456	700.727	541.844	399.273	270.395	0.99046	2.5807	3.33119	3.27322	2.90225	2.46175	1.89944	2	2
Mt2	348.368	1178.85	1613.85	1967.15	1727.8	1477.27	1171.99	540.933	1.7587	2.21182	2.49742	2.31025	2.08425	1.75028	0.634838	2	2
Bcl2a1a	54.6542	104.308	296.512	481.696	437.549	338.255	268.124	195.399	0.932446	2.43969	3.13972	3.00104	2.62971	2.2945	1.83802	2	2
Adora2b	5.26474	6.51095	63.3646	117.832	65.3592	43.9554	39.7008	31.7655	0.306506	3.58924	4.48423	3.63396	3.06161	2.91473	2.59303	2	2
Zc3h12a	23.258	100.401	144.143	252.278	165.535	120.637	106.004	96.0753	2.10997	2.6317	3.43922	2.83134	2.37487	2.18832	2.04644	2	2
Sqstm1	316.617	436.813	1013.24	1587.98	1357.75	953.601	1104.2	791.273	0.464277	1.67817	2.32638	2.10041	1.59065	1.80219	1.32144	2	2
Tifab	55.5479	27.3876	9.55539	1.52493	8.86265	16.8719	23.4141	24.6894	-1.02021	-2.53935	-5.18692	-2.64792	-1.71911	-1.24635	-1.16984	2	2
Hspa1l	20.8358	108.504	199.846	217.365	113.472	76.5923	45.6126	43.9977	2.38061	3.26175	3.38298	2.4452	1.87813	1.13037	1.07836	2	2
Mid1	22.9259	29.8103	132.791	244.988	109.606	77.8109	73.9776	44.2267	0.378833	2.53411	3.41766	2.25728	1.76299	1.69011	0.947939	2	2
Sdc4	82.2459	206.511	393.228	521.374	463.744	394.249	314.236	213.138	1.3282	2.25735	2.6643	2.49531	2.26109	1.93383	1.37377	2	2
Ehd1	71.1847	95.8539	237.728	450.43	423.16	356.698	341.688	282.368	0.42927	1.73967	2.66166	2.57156	2.32506	2.26304	1.98794	2	2
Nfkb1	27.939	22.6323	108.463	248.595	199.613	147.508	104.413	67.9316	-0.303897	1.95685	3.15344	2.83685	2.40044	1.90195	1.2818	2	2
Rab11fip1	13.3161	44.6236	118.378	143.289	84.2117	56.6996	38.3475	36.544	1.74464	3.15216	3.42768	2.66085	2.09017	1.52596	1.45646	2	2
Nfkbib	13.4622	34.8887	85.8337	130.85	114.873	89.2223	75.1468	49.6863	1.37385	2.67263	3.28093	3.09305	2.72849	2.4808	1.88393	2	2
Fst	2.19993	6.12487	24.7611	49.2295	35.8831	29.1505	16.2312	12.3508	1.47722	3.49255	4.48399	4.02778	3.72799	2.88324	2.48907	2	2
Icam1	44.0584	82.8077	209.513	296.867	210.457	155.007	106.968	104.671	0.910348	2.24955	2.75233	2.25604	1.81484	1.27969	1.24837	2	2
Nr4a3	3.53895	19.73	39.3822	64.0809	32.9527	24.2727	8.84397	9.93186	2.479	3.47615	4.1785	3.219	2.77794	1.32137	1.48874	2	2
Jdp2	7.59001	6.14109	30.1607	117.57	37.9206	15.2643	9.05882	10.2561	-0.305607	1.9905	3.95327	2.32081	1.00799	0.255221	0.434309	2	2
Adora2a	3.77903	9.59624	27.0984	59.2979	45.0299	28.4029	27.489	22.3824	1.34445	2.84212	3.97189	3.5748	2.90995	2.86277	2.56628	2	2
1190002H23Rik	13.2657	54.3434	112.452	123.43	53.6732	28.2714	25.0711	20.9343	2.0344	3.08354	3.21792	2.0165	1.09164	0.918324	0.658168	2	2
Tlr2	48.4449	97.4589	199.414	272.268	206.9	182.08	198.488	136.064	1.00845	2.04135	2.49061	2.09452	1.91016	2.03464	1.48987	2	2
Nupr1	7.14719	27.7922	42.5084	67.3945	45.3341	34.147	46.7717	39.9196	1.95923	2.5723	3.23718	2.66515	2.25631	2.71019	2.48165	2	2
Icosl	5.62553	8.10402	32.265	66.5231	38.159	22.9142	17.6594	12.8266	0.526649	2.51991	3.56379	2.76196	2.02618	1.65038	1.18908	2	2
Stx11	19.3496	38.3266	76.5276	128.449	102.103	77.3535	54.9374	44.9172	0.986042	1.98368	2.73082	2.39965	1.99916	1.50548	1.21496	2	2
Epha4	0.716297	1.20336	10.482	22.8287	19.7492	11.7777	5.28153	5.68268	0.748439	3.87121	4.99415	4.78509	4.03936	2.88233	2.98794	2	2
Ell2	13.4498	14.9328	69.1335	95.278	63.1342	57.6218	58.7815	64.7241	0.1509	2.3618	2.82456	2.23084	2.09903	2.12778	2.26672	2	2
Arrdc3	35.1813	61.8079	10.3671	2.31796	2.47957	4.70731	6.8495	15.5156	0.812982	-1.7628	-3.92388	-3.82665	-2.90183	-2.36074	-1.18109	2	2
Ralgds	8.7675	33.3268	69.6121	71.2184	41.1273	30.1365	34.5702	31.7081	1.92645	2.9891	3.02201	2.22986	1.78127	1.97929	1.85461	2	2
Car4	2.2237	8.51337	21.7785	28.024	27.9185	27.9941	24.9984	24.2161	1.93677	3.29187	3.65563	3.65019	3.65409	3.4908	3.44493	2	2
Txnip	303.869	437.439	102.022	72.4256	131.636	190.226	244.448	196.512	0.525632	-1.57457	-2.06888	-1.2069	-0.675735	-0.313922	-0.628832	2	2
Tgm2	118.95	279.479	425.751	452.074	409.22	340.174	217.839	218.185	1.23238	1.83965	1.9262	1.78252	1.51592	0.872907	0.875197	2	2
Traf1	24.8907	33.1656	96.8241	129.723	117.498	107.394	129.646	116.898	0.414081	1.95976	2.38176	2.23896	2.10923	2.3809	2.23157	2	2
Cdc42ep2	17.1478	21.6207	55.465	106.971	61.7771	50.9729	59.6968	50.6479	0.33439	1.69355	2.64112	1.84905	1.57171	1.79963	1.56248	2	2
Olr1	30.7733	77.4127	139.156	149.836	101.797	109.943	76.6441	84.0131	1.33089	2.17695	2.28363	1.72594	1.837	1.3165	1.44894	2	2
Bcl2a1c	6.84729	11.5311	34.4081	53.6637	49.9933	39.4468	27.9277	23.077	0.751925	2.32914	2.97034	2.86813	2.5263	2.02809	1.75285	2	2
Egr2	61.6825	112.42	72.8358	9.98449	11.1875	26.0798	36.7566	33.2306	0.865966	0.239786	-2.6271	-2.46297	-1.24193	-0.746858	-0.892349	2	2
Odc1	16.08	28.4813	50.6843	96.7774	84.9334	59.4599	18.2881	13.7205	0.824748	1.65627	2.5894	2.40106	1.88665	0.185638	-0.228934	2	2
Mt1	948.991	1747.65	2076.01	2366.4	2330.3	2022.79	1944.74	1066.82	0.88095	1.12935	1.31823	1.29605	1.09188	1.03511	0.16885	2	2
Irf2bp2	48.9793	55.7631	23.3992	6.64871	8.17134	17.0065	35.004	49.469	0.187139	-1.06571	-2.88103	-2.58353	-1.52609	-0.484652	0.0143526	2	2
5430435G22Rik	53.9404	32.1528	16.5373	6.63912	9.29792	15.1782	28.5734	36.4469	-0.746422	-1.70564	-3.0223	-2.53639	-1.82937	-0.916694	-0.56557	2	2
Cks2	15.5837	61.6722	85.5283	85.9195	51.4159	41.6733	33.5789	24.8125	1.98458	2.45636	2.46295	1.72218	1.41909	1.10752	0.671029	2	2
Src	14.1543	10.4144	20.6279	78.2144	74.2328	61.3816	57.6303	49.3119	-0.442661	0.543357	2.46619	2.39082	2.11657	2.02559	1.8007	2	2
Plat	2.72677	7.50181	23.033	25.0655	20.7314	18.6691	15.6176	18.795	1.46005	3.07844	3.20044	2.92655	2.77539	2.51791	2.78508	2	2
F10	288.239	479.431	625.488	752.774	661.772	644.76	610.575	542.692	0.734058	1.11772	1.38495	1.19907	1.1615	1.0829	0.912868	2	2
Tnfaip8l2	52.6405	26.9065	12.768	8.64975	17.9554	26.3293	41.4787	36.2197	-0.968218	-2.04364	-2.60544	-1.55176	-0.999504	-0.343803	-0.539399	2	2
Samsn1	35.5177	60.027	122.711	134.523	111.985	96.6279	61.226	62.9853	0.757073	1.78865	1.92124	1.6567	1.4439	0.785606	0.826477	2	2
Marcks	36.2604	33.3956	82.6942	137.043	118.166	96.0402	67.0357	59.3876	-0.118737	1.18939	1.91816	1.70435	1.40524	0.886535	0.711767	2	2
Six1	1.86921	4.502	10.7056	22.3238	12.8254	9.09281	10.1749	9.34539	1.26814	2.51787	3.57808	2.7785	2.2823	2.44451	2.32183	2	2
Rdh11	10.3788	12.3906	32.1392	56.768	50.1797	37.0497	16.1992	12.2807	0.255606	1.63069	2.45144	2.27346	1.83582	0.642283	0.242753	2	2
Mefv	3.58604	4.4724	25.09	27.4683	16.4286	14.7083	17.0326	18.7025	0.318658	2.80665	2.9373	2.19575	2.03617	2.24784	2.38277	2	2
Abcg1	33.7281	20.9239	12.1396	4.51467	6.1695	10.4372	22.0615	20.9996	-0.688799	-1.47423	-2.90126	-2.45073	-1.69222	-0.61242	-0.683589	2	2
Orai2	10.6397	17.2623	55.0608	55.3678	36.2723	24.263	18.5371	24.1289	0.698167	2.37157	2.37959	1.76941	1.1893	0.800958	1.1813	2	2
Bcl10	34.4773	67.1617	122.447	126.872	85.1717	55.8082	49.6512	40.393	0.961992	1.82844	1.87966	1.30473	0.69483	0.526182	0.228459	2	2
Txnrd1	210.096	183.111	398.749	539.469	497.945	439.416	370.894	341.266	-0.19833	0.924432	1.36049	1.24494	1.06454	0.819958	0.699848	2	2
Irf2	44.711	45.6178	30.619	10.1658	32.7276	63.2858	64.9623	49.9018	0.0289671	-0.546203	-2.13691	-0.450122	0.501252	0.538973	0.158462	2	2
Eif4e	22.2231	29.3321	58.5595	92.4295	73.8775	53.4547	31.2473	32.6114	0.40042	1.39784	2.05629	1.73307	1.26626	0.491671	0.553316	2	2
Pmp22	28.8199	45.0996	80.1132	109.408	94.2418	61.1205	51.6843	37.2216	0.646049	1.47497	1.92458	1.7093	1.08459	0.842661	0.369075	2	2
Peli1	6.47942	9.06521	23.1728	37.7896	37.785	32.5861	22.0888	14.4909	0.484476	1.8385	2.54405	2.54388	2.33032	1.76938	1.16121	2	2
Plscr1	14.215	25.8251	63.8561	66.2902	33.5648	26.334	22.1916	23.6765	0.86136	2.16741	2.22138	1.23953	0.889513	0.6426	0.736042	2	2
Sbds	41.1984	65.7775	109.25	139.725	118.3	84.3374	73.8232	55.5103	0.675006	1.40697	1.76193	1.52179	1.03358	0.841486	0.430167	2	2
Pik3r5	29.1896	31.8571	66.818	106.257	79.8661	67.2653	47.9972	46.0573	0.126161	1.19478	1.86403	1.45213	1.20441	0.717496	0.657975	2	2
Foxp4	14.3322	13.5173	32.4228	58.8297	58.4436	47.7958	46.1523	45.8338	-0.0844531	1.17775	2.03728	2.02778	1.73762	1.68714	1.67715	2	2
Ptpn23	13.6243	12.9791	35.1714	62.0622	41.0033	25.4801	18.9436	17.8819	-0.0699918	1.36822	2.18753	1.58956	0.903189	0.475528	0.392318	2	2
Etf1	36.4861	52.7326	94.8673	119.552	93.092	69.4084	45.8347	39.566	0.531348	1.37856	1.71222	1.35131	0.927763	0.329093	0.116914	2	2
Apobec1	31.4534	24.8513	15.3121	6.9707	15.8275	30.8239	47.0331	44.795	-0.339895	-1.03854	-2.17384	-0.990783	-0.0291666	0.58046	0.510122	2	2
Relb	26.9912	34.1705	69.0439	92.2666	70.5781	53.6589	50.1559	48.8446	0.340262	1.35502	1.77332	1.38673	0.991328	0.89393	0.85571	2	2
Rab8b	46.2995	57.213	120.814	139.862	98.4119	92.4353	66.0179	65.2024	0.305346	1.38372	1.59494	1.08784	0.997447	0.511861	0.493928	2	2
Egln3	197.524	251.368	193.279	77.2981	111.306	196.408	213.394	226.977	0.347773	-0.0313431	-1.35352	-0.827497	-0.00817426	0.111492	0.200518	2	2
Atp6v1e1	150.867	150.553	265.437	360.393	359.823	311.025	302.076	247.706	-0.00300582	0.815092	1.25629	1.25401	1.04375	1.00163	0.715352	2	2
Cd24a	17.2506	45.8838	55.592	60.8576	60.3583	48.8741	27.0024	22.9573	1.41134	1.68823	1.81879	1.80691	1.50242	0.646441	0.412306	2	2
Mtmr7	0.968721	1.50408	11.1833	12.3996	7.18285	6.82063	5.78647	4.47561	0.634728	3.52912	3.67807	2.8904	2.81575	2.57853	2.20793	2	2
Rin2	38.614	29.4649	23.0225	9.57295	20.7125	36.9163	39.9819	29.4038	-0.390127	-0.74608	-2.01209	-0.898622	-0.064866	0.050223	-0.393121	2	2
Fus	111.352	109.409	178.462	271.24	270.543	221.369	197.199	144.52	-0.0253961	0.680489	1.28444	1.28073	0.991326	0.824525	0.376142	2	2
Nfam1	46.7051	22.2403	14.332	10.9759	17.5342	21.9314	28.5125	31.016	-1.0704	-1.70434	-2.08924	-1.41341	-1.09058	-0.711986	-0.590567	2	2
Lrp12	20.7808	38.8783	60.6604	73.6696	39.1341	25.597	21.0951	22.0004	0.903714	1.5455	1.82582	0.913175	0.300724	0.0216567	0.0822786	2	2
Cpt1a	33.2483	17.0086	12.1012	7.25693	11.0276	20.7145	32.2274	30.1057	-0.967016	-1.45813	-2.19585	-1.59216	-0.68264	-0.0449928	-0.143244	2	2
Ptafr	37.6026	54.5946	104.668	109.236	60.4059	55.0833	62.7048	72.0074	0.537926	1.47692	1.53854	0.683857	0.550783	0.737743	0.937313	2	2
Rela	42.4855	56.58	102.199	118.742	98.3758	82.0702	74.4871	59.4294	0.413322	1.26634	1.48279	1.21133	0.949888	0.81002	0.484206	2	2
Chic2	35.8849	31.5539	87.0978	106.561	73.4245	54.2252	57.6275	44.5338	-0.185559	1.27926	1.57023	1.03288	0.595587	0.683381	0.311524	2	2
Eif4a1	378.742	393.362	580.274	775.202	694.572	556.537	380.787	300.519	0.0546422	0.615519	1.03336	0.874909	0.555262	0.00776881	-0.333759	2	2
Ezr	17.4181	27.1816	43.9188	59.5964	55.4734	39.7801	29.7472	23.9244	0.642043	1.33425	1.77464	1.67121	1.19146	0.772167	0.457895	2	2
Arf4	50.509	104.949	124.3	131.276	123.765	113.655	101.163	90.6555	1.05508	1.29921	1.37799	1.29299	1.17005	1.00207	0.843854	2	2
H2-Ab1	314.435	581.906	630.535	635.529	567.017	564.162	602.614	537.057	0.888024	1.00381	1.0152	0.85063	0.843348	0.938472	0.772313	2	2
Rrs1	11.2134	6.05481	18.7663	49.5672	31.7956	20.1722	10.7056	9.86842	-0.88907	0.74292	2.14416	1.5036	0.847145	-0.0668581	-0.184333	2	2
Top1	26.7481	27.5985	75.9258	85.5286	44.465	38.5361	32.9857	30.6856	0.0451534	1.50515	1.67697	0.733234	0.526774	0.302404	0.198125	2	2
Ptpn12	40.7771	36.185	64.5317	115.474	96.3472	71.8073	51.2712	48.6402	-0.172367	0.662249	1.50174	1.24048	0.816371	0.330389	0.25439	2	2
Ube2s	48.5051	80.7055	99.339	127.42	101.542	87.535	95.4337	72.5201	0.734531	1.03422	1.39338	1.06587	0.851724	0.976362	0.580244	2	2
Sash3	22.9015	14.752	9.45881	3.32396	3.79114	4.26262	6.58461	9.97699	-0.634532	-1.27571	-2.78447	-2.59474	-2.42563	-1.79827	-1.19877	2	2
Gramd1a	12.7465	34.7633	30.128	45.9419	41.9542	28.7078	16.2489	15.4227	1.44746	1.241	1.84971	1.71871	1.17134	0.350241	0.274954	2	2
Sfpq	51.8064	29.8268	67.4627	136.532	127.064	98.2023	65.1448	42.2134	-0.796521	0.38096	1.39804	1.29435	0.922626	0.33052	-0.295429	2	2
Irak2	33.9983	62.8753	82.273	92.9259	65.8241	53.5362	59.1977	49.6647	0.887031	1.27496	1.45062	0.953153	0.655052	0.800079	0.546758	2	2
Dyrk2	7.3923	12.4702	22.1746	30.9836	21.7335	19.9145	14.5879	13.3827	0.754389	1.58481	2.06741	1.55583	1.42972	0.980677	0.856274	2	2
Cpeb4	11.1814	16.6262	26.1823	40.4223	39.8791	31.142	16.3602	15.7418	0.572358	1.22749	1.85405	1.83453	1.47776	0.54909	0.4935	2	2
Sf1	46.8196	79.0737	105.365	120.716	95.0151	72.825	52.6821	43.1961	0.756085	1.17021	1.36643	1.02104	0.637321	0.1702	-0.116212	2	2
Tank	43.9281	32.9245	101.864	110.875	104.43	100.855	76.1791	69.4166	-0.415983	1.21343	1.33572	1.24932	1.19907	0.794251	0.660137	2	2
Bcl2l1	21.9807	18.1322	26.5378	69.9784	48.9367	30.9823	26.7372	20.2134	-0.277683	0.271811	1.67067	1.15468	0.495207	0.282611	-0.120925	2	2
Spred1	14.8184	12.8717	31.2627	46.9471	36.8633	44.3009	36.1516	31.1253	-0.203187	1.07705	1.66365	1.3148	1.57995	1.28667	1.0707	2	2
Zeb2	25.7326	31.8003	52.2863	73.7237	60.7116	42.7766	25.8336	27.0383	0.305443	1.02284	1.51853	1.23837	0.733225	0.00565147	0.0714072	2	2
Arl11	30.2885	14.7531	10.242	6.64425	6.84171	7.84148	14.0796	16.4105	-1.03775	-1.56427	-2.18859	-2.14634	-1.94957	-1.10516	-0.884151	2	2
Crtc2	21.0893	36.27	45.4829	61.634	43.5644	34.15	33.4724	27.3181	0.782266	1.10881	1.54722	1.04664	0.695374	0.666461	0.373346	2	2
Mapk6	16.4998	26.8686	44.0602	50.0695	42.1503	36.9382	25.215	25.1784	0.703473	1.41703	1.60148	1.35309	1.16267	0.611834	0.609738	2	2
Prkcd	145.445	144.778	177.541	301.007	290.858	219.862	194.624	167.954	-0.00663131	0.287679	1.04932	0.999841	0.596125	0.420216	0.207592	2	2
Ciapin1	4.58654	8.094	20.6347	22.4947	12.0518	8.36641	7.80363	7.32243	0.819447	2.16959	2.29411	1.39377	0.867202	0.766739	0.674916	2	2
Zhx2	3.30723	4.54449	4.96922	18.5843	18.078	12.0136	6.68736	5.96686	0.458495	0.587396	2.49039	2.45054	1.86097	1.01581	0.851349	2	2
Pabpc4	20.9853	20.1265	39.1079	61.9828	60.0464	46.1557	18.5508	9.7001	-0.0602828	0.898081	1.56249	1.5167	1.13713	-0.177898	-1.11331	2	2
Cd300lf	60.4537	41.4672	37.3066	23.6425	27.0984	42.4313	115.805	119.01	-0.54386	-0.6964	-1.35445	-1.15762	-0.510702	0.937795	0.97718	2	2
Flna	129.51	57.4905	56.4601	54.8237	71.8804	84.3794	108.052	113.159	-1.17167	-1.19776	-1.24019	-0.849393	-0.618101	-0.261338	-0.194712	2	2
Lrrfip2	19.4092	36.1223	43.4949	54.9594	41.7624	36.596	36.8451	29.0508	0.896149	1.16411	1.50163	1.10546	0.914945	0.924732	0.581837	2	2
Ankrd37	52.7824	71.5876	37.524	19.2777	23.8171	21.6168	47.3963	59.6464	0.439653	-0.492243	-1.45312	-1.14806	-1.2879	-0.155283	0.176378	2	2
Fzd7	24.5054	46.0403	22.9737	7.2501	11.4629	18.5888	19.3362	24.764	0.909798	-0.0931165	-1.75703	-1.09613	-0.398666	-0.341795	0.0151447	2	2
Rybp	6.40616	10.9305	21.2765	25.1541	21.9546	18.5826	11.026	9.25552	0.770828	1.73173	1.97326	1.77699	1.53642	0.783378	0.530854	2	2
Abtb2	3.9213	3.23199	10.2712	19.2291	16.4435	13.0614	11.2616	7.26609	-0.278909	1.3892	2.29389	2.06811	1.73591	1.52201	0.889847	2	2
Pxn	31.1484	32.7834	38.2029	82.1273	68.0493	45.2462	37.6901	36.8237	0.0738074	0.294524	1.3987	1.12742	0.538639	0.275028	0.241477	2	2
Myo1g	60.2914	62.0136	86.2863	139.514	118.853	88.4914	57.9316	61.6671	0.0406324	0.517179	1.21039	0.979154	0.553585	-0.0576017	0.0325488	2	2
Optn	2.8421	2.58344	9.165	16.915	13.1209	8.20805	5.63831	5.62853	-0.137664	1.68918	2.57327	2.20684	1.53008	0.988305	0.985801	2	2
Jarid2	6.84883	12.3557	17.79	25.9703	21.5695	17.8896	13.2478	13.699	0.851247	1.37714	1.92293	1.65506	1.38519	0.951823	1.00014	2	2
Pilrb2	9.91114	12.7878	23.0722	32.1721	26.9072	25.3213	28.9293	26.4672	0.367645	1.21903	1.69869	1.44087	1.35323	1.54541	1.41708	2	2
Tes	32.7232	39.5651	59.1502	82.3311	70.717	55.8941	47.313	52.3353	0.273915	0.854069	1.33112	1.11174	0.772382	0.531923	0.677471	2	2
Map4k4	28.838	40.2281	56.1855	73.5842	68.9075	57.416	41.123	43.3783	0.480232	0.962227	1.35142	1.25669	0.993482	0.511974	0.589002	2	2
Il17ra	14.0927	10.444	31.6143	45.7612	23.1947	20.0901	19.0111	18.1667	-0.432274	1.16563	1.69918	0.718847	0.511537	0.431894	0.366348	2	2
Tlr8	12.373	7.74488	4.94491	2.98039	10.6501	23.2311	21.6412	22.5233	-0.675881	-1.32318	-2.05362	-0.216328	0.908862	0.806585	0.864223	2	2
Trim36	3.58825	10.8322	16.9477	18.1043	9.82817	7.38506	4.32803	5.60571	1.59397	2.23974	2.33498	1.45364	1.04133	0.27043	0.643617	2	2
Gde1	53.8093	77.5126	107.915	119.425	105.59	90.4202	85.7773	99.6979	0.526575	1.00397	1.15018	0.972546	0.74879	0.67274	0.889708	2	2
Enc1	7.31058	8.4385	23.8645	33.0584	6.75866	3.66249	1.82709	2.20832	0.207001	1.70681	2.17696	-0.113249	-0.997161	-2.00044	-1.72704	2	2
Ptpn6	59.2994	47.9027	38.1399	24.778	46.7748	66.2904	107.777	98.5645	-0.307911	-0.636716	-1.25896	-0.342286	0.160782	0.86196	0.733051	2	2
Pfkfb4	15.3456	11.3588	5.93967	3.55212	7.90508	11.4414	14.7893	18.8678	-0.434015	-1.36937	-2.11107	-0.956973	-0.423561	-0.0532713	0.298101	2	2
Txnl1	23.7644	31.6312	44.8646	59.8022	58.6939	48.8569	39.3591	33.2145	0.412546	0.916776	1.3314	1.30441	1.03976	0.727895	0.483011	2	2
Rsc1a1	24.5439	24.7135	17.5395	6.91476	9.00382	10.9664	13.0824	14.7799	0.00993483	-0.484757	-1.82761	-1.44676	-1.16227	-0.907737	-0.731728	2	2
Vcl	12.3536	7.77565	21.8604	38.0938	33.4981	24.6624	15.7863	15.9915	-0.667896	0.823388	1.62462	1.43915	0.997382	0.353742	0.372374	2	2
Dok3	30.0661	18.5258	17.0448	10.0981	14.7114	19.2063	34.4493	33.1289	-0.698602	-0.818806	-1.57405	-1.0312	-0.646558	0.196337	0.139953	2	2
Eif1a	24.2563	21.6756	36.1669	62.124	55.92	44.7776	24.0725	19.6111	-0.162288	0.57631	1.35679	1.205	0.884418	-0.0109735	-0.306689	2	2
Pip5k1a	11.0527	17.0122	23.3466	33.6277	27.6194	20.4514	12.9114	13.3262	0.622171	1.07881	1.60525	1.32128	0.887801	0.224247	0.269867	2	2
Zc3h15	24.746	32.5456	45.6761	61.1175	48.5202	41.1376	32.7342	28.5607	0.395267	0.884244	1.30439	0.97139	0.733262	0.403603	0.206836	2	2
Cry1	6.52941	7.17035	14.8288	25.0205	19.0322	11.1071	5.03839	5.66245	0.135091	1.18338	1.93809	1.54342	0.766458	-0.37399	-0.205526	2	2
Elmo2	21.9614	14.7339	12.0215	5.54933	5.7816	7.2417	9.05256	12.3161	-0.575831	-0.869353	-1.98458	-1.92543	-1.60057	-1.27857	-0.834425	2	2
Ampd3	21.1518	15.5445	32.9882	53.8127	44.8287	35.6192	34.2117	38.0084	-0.444376	0.64117	1.34717	1.08364	0.751875	0.693709	0.845538	2	2
G3bp1	49.7772	35.8951	78.062	109.609	95.7103	72.3826	46.2937	39.081	-0.471698	0.649135	1.13881	0.943189	0.540158	-0.104669	-0.349018	2	2
Sema7a	8.21738	11.9293	22.522	25.4764	23.7852	19.5569	17.042	19.0018	0.537759	1.45458	1.63241	1.53331	1.25093	1.05234	1.20939	2	2
Ptpre	43.7001	36.1384	60.5417	98.3867	70.8852	52.8772	46.3748	53.7212	-0.274104	0.470293	1.17083	0.697848	0.275009	0.0857045	0.297855	2	2
Ugcg	15.0937	28.8574	41.2797	42.6847	23.6749	16.6864	10.9712	9.90113	0.934995	1.45149	1.49977	0.649412	0.144726	-0.460225	-0.608281	2	2
Rgs16	14.3873	14.2103	8.82484	4.21597	13.7238	26.2827	22.757	9.76313	-0.0178589	-0.705154	-1.77086	-0.0681159	0.869318	0.661515	-0.55938	2	2
Cdkn2b	56.7422	35.188	25.3477	23.0188	29.3933	31.6528	42.6645	49.0893	-0.689339	-1.16257	-1.30161	-0.948935	-0.842089	-0.411386	-0.209013	2	2
Siah2	5.85568	11.8078	18.2385	21.3524	14.2297	10.2751	8.48013	7.61843	1.01183	1.63908	1.86649	1.281	0.811244	0.53425	0.379657	2	2
Atp13a2	38.9096	31.6187	22.8617	14.4664	15.002	17.2698	27.4348	41.3152	-0.299348	-0.767193	-1.42742	-1.37497	-1.17187	-0.504119	0.0865465	2	2
Tmem43	58.3658	32.9596	23.6916	23.18	23.4151	25.4061	32.6433	43.994	-0.824425	-1.30075	-1.33224	-1.31768	-1.19995	-0.838336	-0.407816	2	2
Mknk1	21.511	16.1696	12.3094	5.9785	7.18704	8.70136	12.6956	14.034	-0.411791	-0.805314	-1.84722	-1.5816	-1.30576	-0.760746	-0.616148	2	2
Itgav	10.5087	9.66754	18.6324	30.9047	29.9518	25.3363	14.3878	17.7145	-0.120363	0.826229	1.55624	1.51106	1.26962	0.453262	0.753347	2	2
Rffl	9.28845	11.9927	25.7526	27.2362	22.3707	22.0383	19.7687	19.3004	0.368647	1.47121	1.55202	1.2681	1.2465	1.08971	1.05512	2	2
Rab22a	16.5597	15.7093	22.0595	42.9312	39.6003	33.854	33.6583	25.5978	-0.0760576	0.413724	1.37435	1.25783	1.03165	1.02329	0.628343	2	2
Tax1bp1	41.7621	51.0677	73.5469	88.7021	80.7755	76.1375	68.4493	74.1594	0.290217	0.81647	1.08677	0.951724	0.866413	0.712842	0.828435	2	2
Zfp703	20.9299	29.9858	41.2298	51.6918	34.2683	29.7477	36.0781	29.4073	0.518714	0.978122	1.30437	0.711309	0.507213	0.785558	0.490609	2	2
Myo10	7.55938	7.51499	10.6542	25.2051	16.6748	15.2827	13.8551	15.4462	-0.00849673	0.495082	1.73738	1.14133	1.01556	0.874077	1.03091	2	2
Pstpip2	22.6504	19.3826	35.3124	53.2278	52.4974	49.2771	45.8333	49.2587	-0.224774	0.640638	1.23264	1.21271	1.12138	1.01686	1.12084	2	2
Golph3	33.2809	39.9325	61.2709	74.5893	64.5795	52.1644	39.6326	40.9163	0.262869	0.880508	1.16427	0.956382	0.648371	0.251993	0.297981	2	2
Slc40a1	23.5352	12.3627	7.05045	6.59927	11.6184	12.2703	11.8939	11.1022	-0.928826	-1.73903	-1.83444	-1.01841	-0.93965	-0.984598	-1.08397	2	2
Kdm4a	28.0127	40.9681	42.1449	64.1358	49.4765	44.5353	43.6437	42.8715	0.54842	0.589277	1.19505	0.820662	0.668868	0.639692	0.613938	2	2
Ldlrap1	23.719	19.6933	11.2	7.6294	9.91826	11.9294	22.5878	20.9215	-0.268338	-1.08254	-1.6364	-1.25788	-0.991522	-0.0704994	-0.181057	2	2
Ccr5	99.1819	72.8766	53.8515	48.1566	74.5634	100.276	78.6987	84.4436	-0.444621	-0.88109	-1.04234	-0.411609	0.0158276	-0.333737	-0.232089	2	2
Nck1	17.244	27.2751	39.5692	42.547	38.8335	31.2784	27.7793	28.2031	0.66149	1.19828	1.30296	1.17121	0.859072	0.687916	0.709759	2	2
Dab2	21.4717	26.082	43.3507	51.5986	39.2828	33.9376	30.511	29.7261	0.280618	1.01362	1.2649	0.871461	0.660448	0.506893	0.469294	2	2
Wipf1	31.6424	28.7449	21.0755	11.5791	13.4548	19.6171	21.3867	25.5186	-0.138553	-0.586292	-1.45034	-1.23374	-0.689747	-0.565145	-0.31031	2	2
Nip7	11.9762	23.7892	32.1186	32.7991	24.3684	19.2003	16.2061	11.086	0.990137	1.42324	1.45349	1.02484	0.680959	0.436367	-0.111431	2	2
Tollip	25.5177	32.6823	44.1513	60.0107	46.5621	33.0604	24.4265	26.3039	0.357011	0.790958	1.23372	0.867658	0.373606	-0.0630511	0.0437784	2	2
Cd151	32.1681	17.6959	11.9528	11.8536	16.3904	19.4322	28.4856	28.9822	-0.862216	-1.42828	-1.44031	-0.97278	-0.727181	-0.175398	-0.150464	2	2
Dcaf13	22.3936	19.5988	31.3918	51.8929	50.686	45.3113	36.5099	28.6036	-0.192321	0.487301	1.21245	1.1785	1.01678	0.705201	0.35311	2	2
Gtpbp4	24.0519	22.1303	32.391	56.4338	49.3965	40.043	22.9197	18.4701	-0.120128	0.429442	1.23041	1.03826	0.735399	-0.0695627	-0.380959	2	2
Dennd5a	22.9666	27.2199	35.7127	53.4322	47.5913	37.8015	20.9781	26.4884	0.245124	0.6369	1.21817	1.05116	0.718906	-0.130653	0.205823	2	2
Ogt	63.417	43.8262	32.7168	28.4118	35.8785	39.5531	34.6965	44.5894	-0.533076	-0.954838	-1.15838	-0.82175	-0.681079	-0.870079	-0.508169	2	2
Larp4b	24.2726	29.5712	42.2336	55.6686	51.3417	40.3891	19.78	22.5164	0.284864	0.799063	1.19754	1.0808	0.734637	-0.295286	-0.108352	2	2
Tnfsf4	4.0603	5.00446	11.5613	15.1428	12.8691	10.6758	8.38216	7.76448	0.301628	1.50965	1.89897	1.66425	1.39469	1.04574	0.935303	2	2
Setd8	38.0009	29.539	36.953	78.5356	75.0371	61.2967	68.4188	65.9263	-0.363413	-0.0403421	1.04731	0.98157	0.689776	0.848359	0.794821	2	2
Fbxo11	16.3364	23.0788	38.6791	40.3365	30.2265	21.54	13.9908	17.6093	0.498478	1.24346	1.304	0.887724	0.398928	-0.223612	0.108247	2	2
Cd1d1	42.1732	23.6607	23.9734	18.4092	22.8677	25.4072	47.1648	65.1776	-0.833834	-0.814892	-1.1959	-0.883015	-0.731089	0.161384	0.62805	2	2
Ppp1r9b	41.9303	23.5352	18.7895	17.9851	25.9041	31.4953	48.43	40.6822	-0.833173	-1.15807	-1.22119	-0.694813	-0.412857	0.207908	-0.0435955	2	2
Zfp263	12.7386	13.2844	29.4396	33.646	21.6582	17.7257	13.3963	16.6789	0.0605263	1.20855	1.40123	0.765707	0.476636	0.0726279	0.388817	2	2
Asb6	12.2587	10.5948	10.557	32.0588	30.0557	23.615	22.7961	20.4391	-0.21045	-0.215606	1.38691	1.29383	0.945898	0.894981	0.737526	2	2
Runx3	21.776	33.2964	21.4726	8.20316	9.26739	15.3294	20.7164	24.0098	0.612627	-0.0202421	-1.40849	-1.2325	-0.506438	-0.0719657	0.140884	2	2
Acbd3	18.7172	23.2077	25.7054	45.2081	31.6319	23.9666	18.3963	21.7747	0.310239	0.457707	1.27222	0.757016	0.356661	-0.024949	0.218288	2	2
Abi1	35.9097	41.2456	51.6386	74.275	70.0033	57.3451	39.8697	44.4398	0.199867	0.524076	1.0485	0.963049	0.675297	0.150919	0.307479	2	2
Ptger2	11.5098	3.34308	7.69261	32.3674	30.8292	18.5232	12.6406	10.6971	-1.78361	-0.581318	1.49168	1.42143	0.686471	0.135202	-0.105643	2	2
Stk40	10.6664	11.8887	19.9496	28.0215	22.6394	19.0869	21.7096	17.4918	0.156518	0.903286	1.39346	1.08576	0.839509	1.02526	0.713605	2	2
Sfi1	31.0911	19.8208	13.6931	11.8694	14.157	16.9095	18.549	25.1594	-0.649486	-1.18305	-1.38925	-1.13499	-0.878668	-0.74516	-0.305404	2	2
Sipa1	23.1322	17.419	12.7348	8.76143	13.1519	15.8418	23.5837	27.9733	-0.409241	-0.861126	-1.40066	-0.814631	-0.546166	0.0278876	0.274148	2	2
Zbtb7a	17.7376	13.4558	13.7674	41.6064	38.5909	27.8469	29.45	24.2009	-0.398583	-0.365555	1.22999	1.12145	0.650706	0.731457	0.44825	2	2
Vgll4	10.2685	11.4291	7.53798	2.11299	2.53087	3.6785	4.07134	4.34098	0.154486	-0.445976	-2.28087	-2.02052	-1.48104	-1.33465	-1.24213	2	2
Htra2	30.7726	18.9169	16.6295	13.3382	19.021	27.2575	46.7499	44.1532	-0.701971	-0.887902	-1.20608	-0.694053	-0.174993	0.603317	0.520872	2	2
Casp9	11.4537	7.20027	4.16867	2.73614	4.09527	5.30167	8.97274	10.9754	-0.669691	-1.45815	-2.0656	-1.48378	-1.11129	-0.352193	-0.0615402	2	2
Stk38	31.2954	25.8987	19.2576	12.9273	15.3882	20.9302	23.8911	31.0418	-0.273071	-0.700523	-1.27553	-1.02413	-0.580365	-0.389477	-0.0117384	2	2
Ahr	7.20654	13.2463	16.6649	22.7992	10.9276	7.40395	3.67134	4.50133	0.878211	1.20943	1.6616	0.600598	0.0389884	-0.973	-0.678955	2	2
Pdk1	23.5093	18.3051	12.9815	8.34559	9.10447	13.7076	12.4604	14.0742	-0.360986	-0.856774	-1.49415	-1.36858	-0.778256	-0.915881	-0.740179	2	2
Slc16a10	19.8114	11.3025	39.6857	44.9286	35.9433	25.7745	20.2428	26.0957	-0.809689	1.00229	1.1813	0.859392	0.379614	0.031078	0.397481	2	2
Antxr2	25.3318	14.119	38.9715	55.5717	48.4064	36.4685	14.5658	17.7776	-0.843312	0.62147	1.1334	0.934248	0.525701	-0.798365	-0.510889	2	2
Adam10	34.1155	19.0425	16.1416	13.8814	16.3681	18.1359	17.6119	25.2299	-0.841204	-1.07964	-1.29727	-1.05954	-0.911579	-0.953877	-0.435293	2	2
Zkscan17	8.11717	14.2135	18.0133	21.5377	20.8162	18.9832	11.9167	10.8682	0.808213	1.15001	1.40782	1.35866	1.22567	0.553936	0.421064	2	2
Numa1	19.4585	19.4449	14.231	6.74822	6.90167	8.90352	11.9031	12.3871	-0.00100869	-0.451363	-1.52782	-1.49538	-1.12795	-0.709063	-0.651562	2	2
Yrdc	10.4355	14.8225	23.5509	26.7351	21.9062	17.2624	12.1006	9.06555	0.506289	1.17428	1.35724	1.06984	0.726133	0.213579	-0.203033	2	2
Btg3	11.418	24.5126	26.6218	28.2844	22.5704	16.4064	10.9526	9.93778	1.10221	1.2213	1.3087	0.983122	0.522949	-0.0600366	-0.200314	2	2
Ube2j1	25.6276	26.4715	38.4339	53.6985	49.1161	38.9112	27.4559	28.4318	0.0467416	0.584681	1.06718	0.938498	0.602487	0.0994178	0.149807	2	2
Ear2	14.7534	7.80467	6.81089	4.35878	5.93846	5.64411	12.8564	12.0795	-0.918638	-1.11513	-1.75905	-1.31289	-1.38623	-0.198561	-0.288487	2	2
Klf16	8.93591	12.9752	11.5734	25.0065	18.7117	11.1077	6.79827	7.67786	0.53807	0.373126	1.48462	1.06625	0.313874	-0.394447	-0.21891	2	2
Sub1	27.8424	44.8546	48.2098	56.7731	47.4723	39.9615	27.0586	20.8992	0.687972	0.792043	1.02792	0.769802	0.521327	-0.0411964	-0.413836	2	2
Rasa2	4.72816	4.67451	8.56501	15.7885	15.2608	10.183	4.92887	5.28258	-0.0164637	0.857176	1.73952	1.69048	1.10681	0.0599781	0.159964	2	2
Nmd3	9.89282	10.3979	16.5509	25.9961	19.4386	15.516	10.9287	9.00554	0.0718385	0.742456	1.39384	0.974471	0.649303	0.143668	-0.135569	2	2
Ing4	25.9204	21.4649	14.64	10.2511	10.4336	11.0735	16.7618	19.7291	-0.272109	-0.824172	-1.33831	-1.31285	-1.22698	-0.628911	-0.393763	2	2
Smndc1	21.2724	27.75	36.8253	44.4641	44.1698	40.3731	26.6353	23.1995	0.383505	0.791714	1.06366	1.05408	0.924412	0.324357	0.125111	2	2
Rgs19	42.9354	23.2899	20.1873	19.8932	23.9416	24.0182	32.9311	40.518	-0.882463	-1.08872	-1.10989	-0.842648	-0.83804	-0.382717	-0.0836047	2	2
Nisch	52.1477	46.2238	33.2381	25.7326	30.463	33.5398	39.7877	45.7559	-0.173968	-0.649766	-1.01901	-0.775546	-0.63673	-0.390281	-0.188646	2	2
Erbb2ip	12.9627	12.3488	23.5722	31.5021	22.5087	17.9025	11.5048	12.9139	-0.0699954	0.86272	1.28108	0.796116	0.465795	-0.17213	-0.00544149	2	2
Phf23	29.524	22.8626	22.2581	60.8618	47.4019	31.1439	30.9488	30.6223	-0.368899	-0.407558	1.04365	0.683057	0.0770614	0.0679953	0.0526945	2	2
Nek6	25.493	24.0266	13.9357	10.8042	15.8196	21.9093	20.7207	25.0593	-0.0854687	-0.871316	-1.23851	-0.688388	-0.218558	-0.299028	-0.024755	2	2
Mylip	22.5325	16.7723	21.505	9.01853	10.261	10.8885	15.2798	20.0287	-0.425927	-0.0673353	-1.32104	-1.13484	-1.0492	-0.560382	-0.169939	2	2
Gart	20.1722	8.85129	7.20779	6.90513	8.10027	9.73705	10.8684	9.07479	-1.18841	-1.48474	-1.54663	-1.31633	-1.05081	-0.892229	-1.15243	2	2
Metap1	20.1503	22.0286	27.3507	40.3895	39.8945	36.5511	35.7745	39.4773	0.128576	0.440776	1.00318	0.985389	0.859114	0.82813	0.970222	2	2
Cdca4	12.9153	13.5909	17.112	30.0349	24.7186	17.375	13.7642	10.8861	0.0735598	0.405927	1.21756	0.936516	0.427932	0.0918396	-0.246594	2	2
Arhgap31	16.0128	10.0371	19.7163	34.5804	31.3437	29.0332	21.8407	21.9765	-0.673883	0.300163	1.11073	0.96895	0.858478	0.447793	0.456736	2	2
Nup54	9.68607	10.7349	15.6774	23.9059	20.0435	15.6108	10.2288	9.21657	0.148325	0.694703	1.30338	1.04915	0.688561	0.0786536	-0.0716815	2	2
Mef2a	13.3707	17.6128	25.0706	30.6633	24.8905	16.5205	6.31481	10.1072	0.397549	0.906922	1.19744	0.89652	0.305182	-1.08226	-0.403692	2	2
Pik3cd	21.3892	35.1979	26.5724	10.0557	13.3825	22.76	28.1844	29.5306	0.718607	0.313046	-1.08887	-0.676535	0.089618	0.398014	0.465328	2	2
Notch1	27.425	25.8681	15.8079	12.8245	24.184	27.3337	26.1221	23.121	-0.0843175	-0.794846	-1.09659	-0.181439	-0.00481086	-0.0702207	-0.246288	2	2
Dscr3	25.315	21.4199	14.8036	11.3707	13.1935	15.7156	19.1027	24.8624	-0.241041	-0.774044	-1.15467	-0.940165	-0.687795	-0.406216	-0.0260269	2	2
Lpxn	16.5262	11.2067	10.7482	6.87405	9.74145	15.8574	23.2662	18.188	-0.560394	-0.62066	-1.26552	-0.762547	-0.0595988	0.493481	0.138232	2	2
Was	32.2166	17.4656	16.2832	15.6458	20.493	23.3219	32.7949	34.2742	-0.883288	-0.98442	-1.04203	-0.652673	-0.466119	0.0256672	0.0893187	2	2
Btk	22.3637	15.025	13.4497	10.0429	13.8457	16.7814	21.4369	21.5131	-0.573794	-0.733585	-1.15498	-0.691721	-0.414296	-0.0610626	-0.0559435	2	2
Rsbn1	4.6584	6.07848	8.21723	14.1923	10.8235	7.70662	3.87419	4.82915	0.383876	0.818818	1.6072	1.21626	0.726264	-0.26594	0.0519348	2	2
Klf10	27.1928	34.4568	14.824	13.0551	14.5204	17.9227	20.9894	26.8144	0.341564	-0.87529	-1.05861	-0.905144	-0.601437	-0.373564	-0.0202167	2	2
Inppl1	20.8487	15.6108	11.7187	9.38422	12.9876	16.6078	23.1606	21.3747	-0.417413	-0.831145	-1.15165	-0.682823	-0.328096	0.151715	0.0359467	2	2
Polr1c	17.1377	21.9109	28.496	35.3571	21.9708	17.1371	14.7834	14.1686	0.354475	0.733586	1.04483	0.358414	-5.05104e-05	-0.213195	-0.274476	2	2
Srfbp1	5.75075	7.92463	12.9779	15.5161	10.7709	8.52195	6.34918	6.2917	0.462593	1.17423	1.43194	0.905317	0.567433	0.14282	0.1297	2	2
4930471M23Rik	25.1206	14.2441	11.9974	11.8999	13.7774	17.7335	26.0921	30.8876	-0.818506	-1.06615	-1.07792	-0.866567	-0.502394	0.0547421	0.298157	2	2
Tshz1	12.6014	7.48515	9.65623	28.7238	20.9784	13.8699	10.452	10.8704	-0.751481	-0.384052	1.18866	0.735321	0.138373	-0.269805	-0.213179	2	2
Fbxl3	15.0888	21.6444	27.5965	30.7898	25.5577	21.3685	15.4744	15.3425	0.520516	0.871007	1.02897	0.76028	0.502008	0.0364054	0.0240555	2	2
Srgap2	8.38541	7.28209	6.16892	3.20734	7.81789	12.7695	16.671	15.8842	-0.203529	-0.442863	-1.3865	-0.101102	0.606749	0.991387	0.921639	2	2
Mid1ip1	20.2884	19.9472	12.4778	9.01657	9.18121	11.6646	17.8815	15.0675	-0.0244688	-0.701292	-1.17	-1.1439	-0.798518	-0.182187	-0.429215	2	2
Bach1	18.6696	19.3708	13.457	8.09745	11.096	11.7266	9.92372	11.9197	0.0531925	-0.472334	-1.20515	-0.750651	-0.670906	-0.911738	-0.647343	2	2
Gmeb2	5.97982	8.2471	12.0771	15.2097	12.9069	9.9285	6.92937	6.94928	0.463785	1.0141	1.34682	1.10997	0.731474	0.212622	0.216761	2	2
Cdc42ep3	5.19557	6.89662	10.9302	14.3154	11.1676	7.367	4.66664	4.21271	0.408607	1.07297	1.46221	1.10397	0.503795	-0.154898	-0.302533	2	2
Eif4ebp2	29.4665	22.1835	17.1384	14.3462	15.287	16.151	17.6262	19.4567	-0.409589	-0.781843	-1.03841	-0.94677	-0.867452	-0.741354	-0.598809	2	2
Spsb2	18.3295	15.9315	9.10373	7.926	8.64902	9.01251	14.2216	15.9839	-0.202285	-1.00964	-1.2095	-1.08356	-1.02417	-0.366084	-0.197548	2	2
Grk6	15.6862	11.8693	9.34178	6.12621	7.06346	7.95041	7.4241	9.68511	-0.402261	-0.747727	-1.35643	-1.15105	-0.980395	-1.07921	-0.695656	2	2
Rap2a	21.1767	22.0463	14.5638	9.96871	14.002	16.5162	14.014	17.8629	0.0580588	-0.540091	-1.087	-0.596845	-0.358596	-0.595609	-0.245511	2	2
Ncor2	12.2309	9.56019	9.0471	4.62644	5.62091	7.63019	10.2488	10.4257	-0.355419	-0.435003	-1.40256	-1.12165	-0.68074	-0.255076	-0.230386	2	2
Baz1b	16.5199	14.0423	9.08361	7.56695	13.9178	17.3261	20.0838	17.4649	-0.234426	-0.862867	-1.12642	-0.247274	0.068742	0.281827	0.0802534	2	2
Cyth2	11.511	14.9423	20.5592	23.8806	19.2216	16.6304	17.6022	13.2118	0.376389	0.836771	1.05283	0.739715	0.53081	0.612743	0.198814	2	2
Samd4b	11.6221	15.039	20.1623	23.7677	19.5732	16.9878	17.0766	18.0303	0.371838	0.794789	1.03213	0.752009	0.547628	0.55515	0.633553	2	2
Itpk1	12.6884	15.2735	11.5232	5.50605	8.97417	12.3012	13.7632	12.2542	0.267521	-0.138969	-1.20442	-0.49966	-0.0447111	0.117306	-0.0502339	2	2
Tjap1	7.22641	8.74058	13.3069	16.0571	15.7312	13.1666	12.1802	11.4744	0.27445	0.880824	1.15186	1.12228	0.865532	0.753187	0.667068	2	2
Rras2	9.66061	10.3157	14.4818	21.3131	15.1735	10.4157	8.79958	9.52503	0.0946555	0.584055	1.14155	0.651368	0.108574	-0.13468	-0.0203907	2	2
Rnf2	8.58108	15.359	17.8489	18.4406	16.0538	12.7392	8.83361	10.0763	0.839853	1.0566	1.10365	0.903684	0.570044	0.0418439	0.231735	2	2
Fkbpl	8.26484	4.97869	10.4102	18.7156	12.2724	9.20037	13.7592	13.1449	-0.731221	0.332939	1.17918	0.570359	0.154705	0.735338	0.669444	2	2
Thap11	17.2599	15.1575	9.57095	7.6881	9.59434	9.94675	11.4496	12.2286	-0.187392	-0.85069	-1.16673	-0.847169	-0.795127	-0.592127	-0.497165	2	2
Plekhm1	13.5786	12.9813	8.07558	5.53564	6.47851	7.05505	8.61428	9.97967	-0.0648999	-0.749697	-1.29451	-1.0676	-0.944607	-0.656533	-0.444271	2	2
Cep170	9.86254	17.6899	11.0187	4.04761	5.22066	9.24611	6.89129	8.26721	0.842895	0.159923	-1.28489	-0.917727	-0.0931127	-0.517185	-0.254559	2	2
Tbkbp1	12.5528	10.1457	5.46413	4.95068	6.46233	7.31371	8.37218	9.62476	-0.307141	-1.19995	-1.34231	-0.957883	-0.779334	-0.584334	-0.383187	2	2
Snx27	14.0575	7.85169	6.06631	5.61166	5.9103	6.96176	8.97808	10.2871	-0.840265	-1.21245	-1.32484	-1.25004	-1.01382	-0.646861	-0.450504	2	2
1200011M11Rik	6.6214	7.85249	14.2846	15.0941	11.9745	9.93126	9.22876	8.33805	0.246014	1.10925	1.18878	0.854757	0.58484	0.479001	0.332574	2	2
Map3k14	10.9834	13.4349	6.57993	4.48356	4.59451	7.76986	8.51495	12.0481	0.290661	-0.739181	-1.29261	-1.25734	-0.499364	-0.367255	0.133481	2	2
Dyrk1a	8.1921	14.8903	15.0593	17.339	14.0968	12.7243	9.01646	9.33293	0.862068	0.878349	1.08172	0.783062	0.635281	0.138328	0.188097	2	2
Cdc42bpg	3.87424	4.63232	10.2567	10.6616	7.65172	5.77508	4.67851	4.57753	0.257822	1.40458	1.46044	0.981871	0.575928	0.272136	0.240656	2	2
Fbxo18	12.8237	14.7093	10.5778	6.17281	8.43221	14.3501	19.6205	20.4038	0.197916	-0.277773	-1.05481	-0.60483	0.162248	0.613549	0.670025	2	2
Gon4l	10.0786	6.67299	4.15597	3.98737	7.20896	9.05804	10.0565	9.20822	-0.59489	-1.27804	-1.33779	-0.483432	-0.154024	-0.00316696	-0.130301	2	2
Pcdh7	6.5724	3.55192	9.19845	15.813	11.7056	9.8728	4.86042	5.66624	-0.887821	0.48497	1.26662	0.832707	0.587039	-0.435339	-0.214029	2	2
Nop58	10.6539	5.37548	12.4092	22.6576	15.6714	14.1338	8.29649	4.90895	-0.986916	0.220028	1.08861	0.556752	0.407768	-0.360809	-1.1179	2	2
Aco1	16.3185	9.38148	8.66247	7.65134	9.78476	12.0876	12.2578	12.4589	-0.798621	-0.913658	-1.09272	-0.7379	-0.432981	-0.412808	-0.389332	2	2
Irak4	11.4629	8.11302	5.78128	4.85844	6.44359	7.71953	9.35013	11.2006	-0.498661	-0.987511	-1.23841	-0.831035	-0.570387	-0.293914	-0.0333961	2	2
Stx2	12.0411	6.42238	5.6052	5.29074	5.85221	7.61779	11.6391	15.0211	-0.906787	-1.10313	-1.18643	-1.04091	-0.660523	-0.0489877	0.319023	2	2
Rxra	16.3712	11.1967	9.6558	7.87216	9.43035	8.94991	9.86714	12.0092	-0.548086	-0.761692	-1.05633	-0.795777	-0.871215	-0.730456	-0.44702	2	2
Prdm4	6.78086	6.488	8.81248	14.7611	13.0736	10.0944	6.61151	6.50158	-0.0636944	0.37808	1.12226	0.947116	0.574015	-0.0364885	-0.0606779	2	2
Dag1	12.3044	8.19822	6.15957	5.54902	7.25112	9.32273	8.2087	10.3583	-0.585792	-0.998273	-1.14887	-0.762899	-0.40035	-0.583949	-0.248387	2	2
Unc13d	9.54714	8.72543	7.08153	4.36221	4.51772	6.20229	13.6595	14.9765	-0.129842	-0.431008	-1.13001	-1.07947	-0.622268	0.516764	0.64956	2	2
Nfat5	7.63189	6.67749	13.2834	15.3765	14.3533	12.1107	8.31078	10.9813	-0.192734	0.799512	1.01061	0.91127	0.66617	0.122944	0.524937	2	2
Pspc1	8.64754	5.62907	10.6414	17.7786	14.8071	9.47537	6.57431	7.81471	-0.619393	0.299326	1.03978	0.775927	0.131892	-0.39545	-0.146097	2	2
Ino80b	11.6826	8.42745	8.00325	5.70132	8.93152	10.9018	14.6275	12.3908	-0.471193	-0.545704	-1.03499	-0.387384	-0.099795	0.324322	0.084908	2	2
Abcd3	14.0042	10.5609	8.65501	6.83958	8.66034	10.515	9.77616	10.7322	-0.407127	-0.694252	-1.03388	-0.693364	-0.413411	-0.51852	-0.383914	2	2
Taf6	12.1062	9.7869	7.18781	5.71449	7.24413	7.7017	9.5504	10.3026	-0.306822	-0.752122	-1.08305	-0.740862	-0.652497	-0.342113	-0.232738	2	2
Tmem57	5.48962	6.9514	8.77907	12.1593	10.1944	8.22666	4.31382	5.22128	0.340597	0.677362	1.14728	0.892999	0.583601	-0.34774	-0.0723028	2	2
Sell	9.10109	8.73279	6.27557	4.2158	5.0755	7.79065	12.5389	11.7706	-0.0595967	-0.536293	-1.11023	-0.842489	-0.224296	0.4623	0.371077	2	2
Zfp652	9.37342	13.9787	10.2661	4.32936	4.74448	6.07908	6.74617	7.73149	0.576583	0.131241	-1.11442	-0.982326	-0.624723	-0.474507	-0.277829	2	2
Llgl1	9.22708	8.36698	6.47224	4.54711	8.20647	12.0134	14.1287	12.5476	-0.141167	-0.511609	-1.02092	-0.169112	0.380698	0.614683	0.443465	2	2
Minpp1	10.1813	5.47823	4.89066	4.82341	5.46714	8.91303	12.4279	10.959	-0.89414	-1.05782	-1.0778	-0.897064	-0.191934	0.287661	0.106194	2	2
Hspb1	5.47221	6.23651	10.6011	11.2497	10.5092	8.77934	9.9723	5.16745	0.188615	0.954018	1.03969	0.941457	0.681989	0.865803	-0.0826711	2	2
Macrod1	5.19846	10.6317	11.0017	11.1745	6.96726	7.14544	5.19081	2.40141	1.03222	1.08157	1.10405	0.422507	0.458939	-0.00212462	-1.1142	2	2
Nudt5	10.2407	5.06055	5.05953	4.77611	5.61124	7.14889	8.3385	10.1565	-1.01695	-1.01724	-1.10041	-0.867923	-0.518523	-0.296455	-0.011911	2	2
Cd180	9.73562	5.15427	4.94672	4.84677	5	9.36489	12.959	15.0461	-0.917505	-0.976801	-1.00625	-0.961345	-0.0560108	0.41261	0.628045	2	2
Kdm4b	8.80216	16.0372	12.2536	4.39618	5.95266	6.25472	4.99234	6.14047	0.865493	0.477276	-1.00161	-0.564323	-0.492912	-0.818141	-0.519509	2	2
Mapkap1	9.04706	5.83048	6.11974	4.44679	5.68068	8.2692	10.2769	11.1507	-0.633834	-0.563979	-1.02468	-0.671385	-0.129701	0.183884	0.301613	2	2
Socs3	4.05497	130.208	264.615	296.66	328.209	312.593	286.961	179.583	5.00498	6.02806	6.19298	6.33878	6.26845	6.14502	5.46882	3	2
Il10	0.0305872	2.35754	10.7511	27.7819	47.0549	36.3875	32.8498	21.9351	6.26821	8.45734	9.827	10.5872	10.2163	10.0687	9.4861	3	2
Gadd45b	26.9398	216.338	239.217	326.253	356.346	278.427	260.107	172.95	3.00548	3.15051	3.59818	3.72547	3.36949	3.27129	2.68254	3	2
Clec4e	143.159	347.305	755.594	1017.27	1139.35	1007.12	813.903	909.062	1.27858	2.39999	2.82901	2.99252	2.81455	2.50724	2.66676	3	2
Cxcl3	1169.91	1179.46	2737.14	5195.07	6094.18	5449.73	5755.31	5068.25	0.0117289	1.22627	2.15075	2.38103	2.21979	2.2985	2.11509	3	2
Cxcl5	8.21573	29.8911	65.1068	111.037	134.674	103.615	129.62	130.436	1.86326	2.98635	3.75651	4.03494	3.6567	3.97976	3.98881	3	2
Mapkapk2	75.6009	117.18	235.505	451.138	510.941	436.127	302.096	217.913	0.632251	1.63928	2.57709	2.75668	2.52827	1.99853	1.52728	3	2
Il12a	0.402593	2.34017	4.62305	20.6887	21.0359	19.3027	16.2416	16.7928	2.53922	3.52145	5.68338	5.70739	5.58334	5.33423	5.38238	3	2
Irf1	20.3469	96.01	90.8135	98.6673	144.336	129.312	133.464	89.5569	2.23838	2.1581	2.27776	2.82655	2.66798	2.71357	2.138	3	2
Fpr1	44.2669	45.1675	134.358	217.152	252.954	217.521	212.505	209.278	0.0290567	1.60178	2.2944	2.51457	2.29685	2.2632	2.24112	3	2
Stat5a	9.3036	11.5097	17.232	79.4481	80.126	57.923	26.3192	18.5205	0.306989	0.889229	3.09415	3.10641	2.63828	1.50025	0.993262	3	2
Dusp16	8.68495	17.714	50.6478	64.3894	68.9775	56.7553	29.8931	29.7349	1.0283	2.54391	2.89023	2.98954	2.70817	1.78322	1.77557	3	2
Gas7	11.3069	11.8019	32.5821	78.4235	80.5134	66.4434	40.5125	34.1798	0.0618157	1.52688	2.79408	2.83203	2.55492	1.84116	1.59594	3	2
Batf	6.6297	6.20319	7.5614	49.5568	60.9791	38.5643	31.8108	17.0144	-0.0959333	0.18971	2.90207	3.2013	2.54025	2.2625	1.35974	3	2
Olfr1033	1.54937	10.0459	22.9154	21.6308	23.9708	19.3784	6.11245	5.74708	2.69685	3.88656	3.80333	3.95152	3.6447	1.98007	1.89115	3	2
Ikbke	21.8063	13.8017	26.525	89.2373	116.198	110.269	90.4927	78.6429	-0.659899	0.282608	2.0329	2.41377	2.33821	2.05306	1.85057	3	2
Rps6ka2	5.07708	6.50628	9.62753	35.4455	47.9518	36.2366	12.2293	8.74965	0.357834	0.923167	2.80353	3.23951	2.83538	1.26827	0.785226	3	2
Rhbdf2	21.5096	24.3307	59.0178	99.3857	104.798	90.3611	88.6221	52.6809	0.177797	1.45617	2.20806	2.28456	2.07072	2.04269	1.2923	3	2
Slc7a11	99.5495	64.2546	173.867	264.847	347.78	317.449	191.581	191.57	-0.631614	0.804498	1.41167	1.80469	1.67304	0.944469	0.944386	3	2
Rab32	38.2966	21.3341	63.9369	135.594	157.08	130.189	108.515	108.129	-0.844055	0.739432	1.82401	2.03621	1.76532	1.50261	1.49747	3	2
Irf9	12.7018	10.6242	12.0888	40.3487	71.2786	65.7182	57.1047	48.3974	-0.257679	-0.0713619	1.66749	2.48844	2.37126	2.16858	1.9299	3	2
Srgn	603.621	988.301	1237.22	1330.31	1465.67	1381.17	1438.62	1283.04	0.711308	1.03539	1.14005	1.27985	1.19418	1.25297	1.08785	3	2
Vasp	65.3454	53.5182	83.6818	189.203	223.2	192.228	144.572	136.476	-0.288056	0.356828	1.53378	1.77218	1.55666	1.14563	1.06249	3	2
Hspa5	259.09	478.943	598.496	611.368	676.685	616.677	568.332	482.297	0.886401	1.20789	1.23859	1.38503	1.25106	1.13328	0.896469	3	2
Cd200r1	76.9844	48.6066	31.6785	17.8894	13.7385	16.6235	28.3479	28.9103	-0.663414	-1.28106	-2.10546	-2.48634	-2.21134	-1.44132	-1.41298	3	2
Met	29.9449	18.0841	39.1531	98.8906	121.728	102.863	63.5546	68.1428	-0.727589	0.386816	1.72352	2.02328	1.78034	1.08569	1.18625	3	2
Rassf4	47.6124	36.469	38.8837	124.641	169.174	153.561	111.115	116.427	-0.384667	-0.292172	1.38837	1.8291	1.6894	1.22264	1.29002	3	2
Inpp5d	27.441	23.2743	18.5073	6.82571	3.5999	6.7184	16.0973	21.7982	-0.237595	-0.568239	-2.00728	-2.9303	-2.03014	-0.769514	-0.332124	3	2
Cd80	7.57515	9.1268	16.692	35.0399	42.958	35.8448	27.0925	17.6427	0.268835	1.13981	2.20965	2.50358	2.24242	1.83855	1.21973	3	2
Gyk	2.58652	3.33644	7.05278	19.4829	22.9312	22.3568	11.9885	8.50513	0.367297	1.44718	2.91312	3.14823	3.11163	2.21257	1.71732	3	2
Slc9a3r1	41.025	30.8174	62.5623	125.686	138.114	125.952	104.536	86.4051	-0.412758	0.60879	1.61525	1.75128	1.6183	1.34942	1.07461	3	2
Arrb1	63.115	56.0327	41.3884	18.9196	13.415	18.9954	20.8248	30.4964	-0.171714	-0.608756	-1.7381	-2.23414	-1.73233	-1.59968	-1.04934	3	2
Kpna3	13.4964	17.8168	24.8327	54.426	62.8065	48.9139	23.3137	21.0553	0.400664	0.879666	2.01172	2.21834	1.85767	0.788603	0.641609	3	2
Rap1b	143.465	148.782	244.888	347.088	376.335	326.205	271.696	226.739	0.0525012	0.771423	1.2746	1.39132	1.18508	0.921295	0.660334	3	2
Ppp4r2	21.7401	28.0759	47.7375	78.3211	80.1832	68.8647	46.3995	43.6579	0.368974	1.13476	1.84904	1.88294	1.66341	1.09375	1.00588	3	2
Plagl2	6.93703	8.46875	15.8651	33.031	37.6039	30.3752	19.6786	16.4285	0.287831	1.19347	2.25143	2.43849	2.1305	1.50424	1.24381	3	2
Slc6a12	11.1442	6.72753	13.7499	48.8967	49.86	46.944	34.1027	32.4912	-0.728144	0.303128	2.13344	2.16159	2.07465	1.61359	1.54376	3	2
Hsp90aa1	99.321	115.868	184.872	251.46	264.133	230.726	143.06	140.634	0.222311	0.896356	1.34016	1.41109	1.21601	0.52645	0.501775	3	2
Bcl3	23.4051	25.4322	32.0374	81.5326	82.481	65.6471	69.9643	64.9793	0.119833	0.452934	1.80055	1.81724	1.48791	1.5798	1.47316	3	2
Surf4	95.4669	96.7488	141.463	213.547	249.336	229.144	184.836	167.999	0.0192432	0.567352	1.16148	1.38502	1.26318	0.953173	0.81538	3	2
Dock8	38.3384	31.143	29.1466	16.7301	8.77129	15.8044	39.425	35.298	-0.299882	-0.395463	-1.19634	-2.12793	-1.27846	0.0403206	-0.119204	3	2
Irak3	21.7044	17.8604	38.6913	61.9952	73.6253	71.5012	60.5733	68.265	-0.281223	0.834022	1.51417	1.76221	1.71998	1.48069	1.65316	3	2
Slc39a14	7.81399	5.51991	10.698	29.5721	38.2237	35.1187	20.4999	18.7934	-0.501415	0.45321	1.92011	2.29034	2.16811	1.39149	1.26609	3	2
Pstpip1	43.0859	53.2267	42.2315	17.1003	10.3405	13.0334	22.2308	28.2006	0.304934	-0.0288963	-1.33319	-2.05891	-1.725	-0.954656	-0.61149	3	2
Eif6	72.0716	47.1249	72.1659	142.743	193.207	188.902	187.543	116.304	-0.612941	0.00188642	0.985917	1.42264	1.39014	1.37972	0.690398	3	2
Pilra	37.2471	39.3777	64.4523	93.1958	111.379	102.076	97.1767	82.802	0.0802507	0.791104	1.32314	1.58028	1.45444	1.38348	1.15254	3	2
Ppp1cb	35.4716	44.836	65.9988	95.7063	110.404	92.529	47.0678	43.8282	0.337993	0.895775	1.43195	1.63806	1.38324	0.408076	0.305195	3	2
Nt5e	26.5117	22.8991	18.2521	9.82615	4.0187	4.75375	4.75645	8.58635	-0.211338	-0.538567	-1.43193	-2.72183	-2.47949	-2.47867	-1.62651	3	2
Cyth3	9.47484	7.81728	7.50576	27.9446	45.1113	36.3448	17.3097	16.9347	-0.277435	-0.336103	1.5604	2.25132	1.93958	0.869407	0.837809	3	2
Mllt6	16.8272	14.3798	18.1858	56.7705	63.5457	53.5625	32.7883	29.0601	-0.226752	0.112017	1.75435	1.917	1.67043	0.962386	0.788245	3	2
Mtss1	39.7204	66.9392	58.6186	16.6895	9.89483	14.7139	15.9286	21.1488	0.752971	0.561478	-1.25094	-2.00513	-1.4327	-1.31826	-0.909304	3	2
Sept11	12.9662	9.57401	14.3867	39.6711	55.0109	46.6125	21.8594	9.87066	-0.437561	0.14998	1.61333	2.08496	1.84596	0.753498	-0.393537	3	2
Furin	35.9609	51.4647	58.8939	90.1964	106.506	101.724	93.1084	69.4439	0.517154	0.711689	1.32664	1.56643	1.50016	1.37248	0.949419	3	2
Rhoq	13.8473	19.6935	20.2115	35.5122	53.602	45.8961	28.9427	36.6245	0.508115	0.545572	1.35871	1.95268	1.72877	1.06359	1.4032	3	2
Rasa3	20.8839	16.1489	11.4367	5.22762	2.76885	4.25017	7.0156	10.7346	-0.370955	-0.86872	-1.99816	-2.91503	-2.2968	-1.57375	-0.960123	3	2
Fblim1	24.0736	22.418	15.4079	8.26784	4.17884	6.60798	12.2585	18.0511	-0.102794	-0.643782	-1.54187	-2.52628	-1.86517	-0.973669	-0.415365	3	2
Taf15	47.3798	69.594	82.0401	123.007	129.631	115.6	110.15	71.0895	0.554691	0.792057	1.3764	1.45207	1.2868	1.21713	0.585364	3	2
Stip1	35.5749	32.4926	50.4425	92.792	103.224	93.0806	81.9343	69.5442	-0.130749	0.50378	1.38314	1.53685	1.38762	1.20361	0.96707	3	2
Rnf128	160.624	64.6879	60.2766	61.789	57.6594	61.6155	75.6949	107.908	-1.31212	-1.41402	-1.37827	-1.47806	-1.38232	-1.08542	-0.573886	3	2
Dok2	40.6823	16.8036	16.094	9.79364	9.56149	12.8916	28.5332	35.2026	-1.27563	-1.33788	-2.05448	-2.08909	-1.65797	-0.51176	-0.208719	3	2
Lcp2	24.2278	25.5986	40.0059	70.9688	72.8124	71.0377	62.1561	55.2008	0.0794015	0.723549	1.55052	1.58752	1.55192	1.35923	1.18803	3	2
Mtpn	115.603	107.803	156.078	220.887	265.644	261.815	153.589	144.906	-0.100782	0.433088	0.93413	1.20032	1.17937	0.409896	0.325938	3	2
Fhl3	21.3858	14.1487	14.0769	51.2892	67.6318	58.3266	57.2872	47.9446	-0.595984	-0.603324	1.262	1.66105	1.4475	1.42156	1.16472	3	2
Myo1f	148.099	80.7636	68.5893	62.3616	57.2553	67.7548	109.545	135.761	-0.874785	-1.11051	-1.24783	-1.37108	-1.12817	-0.435038	-0.125493	3	2
Hspa9	62.7895	104.923	123.438	154.044	157.505	119.86	59.0061	41.211	0.740736	0.975191	1.29475	1.3268	0.932755	-0.0896592	-0.607494	3	2
Ccr2	24.3309	18.8527	11.8924	4.64721	3.99944	5.59161	6.06676	7.25132	-0.368019	-1.03275	-2.38835	-2.60492	-2.12145	-2.00379	-1.74647	3	2
Ptprj	27.1951	15.1183	22.9371	60.5747	78.3619	77.104	62.3783	56.351	-0.847051	-0.245664	1.15537	1.52681	1.50346	1.1977	1.05109	3	2
Evl	46.732	37.4351	33.9484	18.9183	14.4499	24.3982	45.6651	45.2598	-0.320019	-0.461067	-1.30463	-1.69335	-0.937636	-0.0333188	-0.0461806	3	2
Stab1	20.4303	8.06417	6.41637	3.6825	3.40157	5.23648	12.9318	15.9444	-1.34111	-1.67088	-2.47195	-2.58644	-1.96404	-0.659787	-0.357661	3	2
Wnt6	2.60518	3.71929	3.32877	10.707	15.4983	15.077	12.3092	11.2647	0.513644	0.353606	2.0391	2.57266	2.53289	2.24028	2.11235	3	2
Tra2b	39.5822	44.3086	72.038	90.4947	100.732	89.7648	58.685	43.1694	0.162735	0.863906	1.19298	1.3476	1.1813	0.56814	0.125157	3	2
Rab12	17.5384	21.5735	31.5628	51.8946	52.0683	47.0088	40.486	32.4452	0.298743	0.847708	1.56507	1.56989	1.42241	1.20691	0.887488	3	2
Eif4g2	77.3573	75.26	107.72	144.838	176.212	166.868	96.892	90.78	-0.0396542	0.477677	0.904831	1.1877	1.1091	0.32484	0.230837	3	2
Suv420h2	22.3125	28.2008	19.0975	8.3033	5.14985	6.40649	10.1808	16.0288	0.337884	-0.224468	-1.4261	-2.11525	-1.80025	-1.132	-0.477186	3	2
Csrp1	26.9714	41.5127	58.1967	64.7972	71.7254	66.7795	52.6997	42.1458	0.622122	1.10951	1.2645	1.41105	1.30797	0.966364	0.643958	3	2
Cd82	45.68	60.7101	75.9364	104.09	109.275	97.3637	80.051	70.9339	0.410374	0.733229	1.1882	1.25833	1.09182	0.809357	0.634913	3	2
Pim2	3.28965	7.45706	8.60731	12.348	17.4725	13.5698	9.06444	6.58665	1.18067	1.38763	1.90827	2.40908	2.04439	1.46228	1.00161	3	2
Cdv3	46.2753	36.4688	59.5721	104.098	114.078	92.7971	54.2845	38.5844	-0.34358	0.364394	1.16963	1.30171	1.00384	0.230298	-0.262225	3	2
Xdh	45.7678	35.2216	32.3004	19.5904	15.2713	20.406	37.3174	41.3512	-0.377872	-0.502781	-1.22419	-1.58351	-1.16534	-0.294484	-0.146404	3	2
Sept9	63.1442	64.9318	50.6487	38.5111	23.2537	23.9455	34.581	45.7523	0.040275	-0.318125	-0.713376	-1.44119	-1.3989	-0.868671	-0.464806	3	2
Calcrl	9.35931	4.61604	6.61938	18.3048	36.1353	32.1583	13.7375	8.38129	-1.01975	-0.499706	0.967748	1.94893	1.78072	0.553645	-0.15923	3	2
Ube2f	31.4609	33.5915	53.8171	77.3267	79.3075	69.0539	56.5672	48.3136	0.0945363	0.774505	1.29741	1.3339	1.13416	0.846406	0.618869	3	2
Pwp1	8.58045	5.11316	7.62334	28.7907	32.3319	24.4517	12.1005	10.1094	-0.746838	-0.17063	1.74648	1.91383	1.51081	0.495941	0.236572	3	2
Rnf11	28.1488	28.3956	38.6646	61.9228	74.3537	60.6265	30.1313	26.7205	0.012594	0.45794	1.1374	1.40133	1.10688	0.0981895	-0.0751264	3	2
Plekho1	84.0173	70.7258	55.6446	39.526	34.0385	34.4447	71.9961	71.9703	-0.24845	-0.594445	-1.08788	-1.30352	-1.2864	-0.222768	-0.223285	3	2
Setd7	14.8712	14.5943	8.36097	3.70446	2.47918	3.29783	4.77094	8.85327	-0.0271161	-0.830779	-2.00519	-2.58459	-2.17293	-1.64018	-0.748239	3	2
Mast3	17.6932	16.6022	9.98559	3.58767	3.3415	4.22053	5.24992	8.38219	-0.0918206	-0.825275	-2.30208	-2.40463	-2.0677	-1.75283	-1.0778	3	2
Klhl5	27.1282	20.906	17.0976	9.75012	7.80211	14.3704	21.6281	23.465	-0.375876	-0.665999	-1.4763	-1.79786	-0.916693	-0.326886	-0.209283	3	2
Ptch1	2.32724	5.02718	3.15152	10.2021	15.6014	9.63914	2.71671	3.27911	1.11113	0.437428	2.13217	2.74498	2.05028	0.223241	0.494684	3	2
Dgkz	42.9446	48.7796	33.1627	16.7123	15.4751	22.2465	34.2555	38.2073	0.183801	-0.372915	-1.36157	-1.47253	-0.948898	-0.326141	-0.168628	3	2
Dynlt1b	32.737	28.9321	24.5574	19.4065	10.8616	12.7685	24.0039	37.0762	-0.178251	-0.414764	-0.754382	-1.59169	-1.35833	-0.447653	0.179571	3	2
Coro1c	61.0523	38.1914	32.9004	27.9224	23.0263	23.6711	34.9486	41.3861	-0.676798	-0.891941	-1.12862	-1.40676	-1.36692	-0.804811	-0.560899	3	2
Hnrnpab	95.1395	56.9797	99.583	175.38	195.146	173.431	114.304	77.8872	-0.739596	0.065855	0.882368	1.03644	0.866245	0.26476	-0.288658	3	2
Abcd1	20.5012	13.8459	10.7978	7.224	5.07883	6.46675	11.3565	20.0503	-0.56625	-0.924971	-1.50484	-2.01314	-1.6646	-0.85219	-0.0320845	3	2
Gnai3	55.7314	51.3241	67.7687	103.048	122.808	100.534	58.7736	60.3121	-0.118854	0.282129	0.886754	1.13984	0.851121	0.0766779	0.113957	3	2
Cnpy3	54.6287	38.4472	30.1407	23.0687	21.5154	26.9176	45.0613	52.9748	-0.506781	-0.857946	-1.24372	-1.34429	-1.02111	-0.27777	-0.0443529	3	2
Il1rap	3.62982	3.41985	5.12729	11.6325	16.1597	14.4784	10.5685	10.2149	-0.085965	0.498298	1.68019	2.15443	1.99593	1.5418	1.49271	3	2
Arhgap9	44.6603	24.8563	22.6807	19.1598	15.8114	16.6466	25.6291	30.6617	-0.845381	-0.977528	-1.22091	-1.49803	-1.42377	-0.80121	-0.542555	3	2
Rps6ka1	26.7229	18.0935	13.7686	9.75902	7.65426	8.73265	11.7275	19.0667	-0.562605	-0.956695	-1.45327	-1.80374	-1.61359	-1.18818	-0.487021	3	2
Tab2	22.7459	29.9787	32.1852	46.7505	56.1344	50.8755	41.608	35.652	0.398331	0.500791	1.03938	1.30328	1.16136	0.871254	0.648376	3	2
Angptl2	21.3193	14.8477	10.6674	9.40697	5.64239	5.76817	11.854	16.6649	-0.521921	-0.998951	-1.18036	-1.91778	-1.88597	-0.846786	-0.355347	3	2
Appl2	33.4315	48.7761	41.988	20.0551	12.2162	15.0195	16.8444	21.9792	0.544966	0.328769	-0.737239	-1.45241	-1.15437	-0.988939	-0.605069	3	2
Apbb1ip	70.828	68.0434	71.5945	113.719	146.691	121.889	71.4878	60.1896	-0.0578646	0.015529	0.683082	1.05039	0.783176	0.0133772	-0.234806	3	2
Ppfibp2	14.2956	13.2783	14.7591	22.7542	39.5872	35.371	29.3763	29.0285	-0.106501	0.0460336	0.670562	1.46946	1.307	1.03908	1.0219	3	2
Rab31	30.1742	26.1781	22.0604	11.7486	10.0332	14.6115	17.6496	20.7469	-0.204955	-0.451857	-1.36083	-1.58853	-1.04621	-0.77368	-0.54042	3	2
Usp12	11.9677	9.91197	12.6943	26.3479	34.8225	33.1507	22.4506	15.8617	-0.271902	0.0850349	1.13854	1.54087	1.46989	0.907608	0.406401	3	2
Mtf2	5.81298	6.19183	8.73266	16.6957	20.814	17.8504	11.8611	12.4985	0.0910879	0.587143	1.52213	1.8402	1.61861	1.02889	1.10441	3	2
Narf	11.9445	21.9516	11.786	3.54335	2.7933	3.33846	6.10869	11.8284	0.87798	-0.0192723	-1.75316	-2.0963	-1.83909	-0.967412	-0.0140915	3	2
Fzd1	13.0013	8.48064	15.996	34.8959	36.3181	32.4117	24.189	15.7528	-0.616411	0.299055	1.4244	1.48203	1.31786	0.895695	0.276952	3	2
Rassf8	22.6683	28.2032	24.342	12.1022	6.96501	8.34329	8.06905	9.22565	0.315183	0.102772	-0.905407	-1.70248	-1.44199	-1.49021	-1.29695	3	2
Eif2s2	28.7786	39.9966	44.4874	58.4143	65.7312	58.0872	42.7011	35.9375	0.474881	0.6284	1.02133	1.19158	1.01322	0.569277	0.320494	3	2
Agfg2	10.7922	14.0386	11.8142	4.42512	2.15099	2.18915	3.51771	6.98277	0.37941	0.130533	-1.2862	-2.32692	-2.30155	-1.61728	-0.628118	3	2
Stx6	19.6525	18.697	24.4515	41.5666	48.2871	42.2659	30.8158	27.4035	-0.071906	0.31521	1.08071	1.29692	1.10478	0.648957	0.479647	3	2
Reps1	9.07033	12.7356	15.9378	26.1827	27.3853	21.0638	10.8998	9.53357	0.48964	0.813226	1.52939	1.59417	1.21554	0.265075	0.0718615	3	2
Sh3bp1	27.4095	31.4243	28.0623	15.4996	10.4059	12.6418	24.0812	29.7193	0.197205	0.0339572	-0.822445	-1.39727	-1.11647	-0.186769	0.116724	3	2
Svil	15.3432	12.0366	11.3777	5.96058	3.7838	4.61219	6.96372	8.42599	-0.350171	-0.43139	-1.36407	-2.01969	-1.73408	-1.13967	-0.864681	3	2
Nrp1	56.8506	27.3371	26.7611	26.2251	23.8208	24.6785	29.5735	27.4893	-1.05632	-1.08704	-1.11623	-1.25495	-1.20392	-0.942871	-1.04831	3	2
Dhx15	39.9057	50.1115	59.3923	78.5247	82.5511	73.6034	39.9079	38.6047	0.328547	0.573681	0.976552	1.04869	0.883178	7.95335e-05	-0.0478183	3	2
St8sia4	31.9476	31.8693	49.9689	66.0716	68.773	67.0571	29.9438	24.9335	-0.00354022	0.645323	1.04832	1.10613	1.06968	-0.0934502	-0.357622	3	2
2810474O19Rik	9.5246	11.3087	14.5703	17.0737	26.7978	25.5126	17.2951	14.9225	0.247703	0.6133	0.842045	1.49238	1.42148	0.860633	0.647759	3	2
Cd200r2	32.4607	19.7204	15.515	16.7662	11.8015	12.5933	20.1456	16.9338	-0.719005	-1.06503	-0.953138	-1.45972	-1.36604	-0.688229	-0.938788	3	2
Acot9	24.0686	25.5931	30.2413	44.0851	53.9587	50.1149	40.639	33.7465	0.0886027	0.329368	0.873139	1.1647	1.05809	0.755713	0.487586	3	2
Znrf1	10.0862	9.01893	9.77657	20.9495	28.7753	22.6222	16.0486	13.6944	-0.161355	-0.0449824	1.05453	1.51245	1.16536	0.670065	0.441203	3	2
Tgfbr2	19.6882	17.4756	14.9898	9.39907	6.29687	7.65311	10.1836	14.636	-0.171989	-0.39335	-1.06674	-1.64462	-1.36321	-0.951084	-0.42781	3	2
Dmxl2	14.2271	19.0155	15.8131	7.86119	4.01951	4.24019	4.38513	8.55149	0.418534	0.152479	-0.855822	-1.82355	-1.74644	-1.69795	-0.734394	3	2
Fbxo31	10.5974	18.4614	11.5014	3.65781	2.53334	2.8613	3.65865	5.76116	0.800802	0.118099	-1.53466	-2.0646	-1.88897	-1.53433	-0.879279	3	2
Lrp1	62.2803	51.5061	38.3845	31.2682	29.3192	35.2279	41.521	44.3779	-0.274033	-0.698252	-0.99408	-1.08693	-0.822057	-0.584935	-0.488934	3	2
Ube2z	27.4555	26.6142	38.2092	56.8584	57.8194	49.3769	43.7019	40.4428	-0.044899	0.476825	1.05028	1.07446	0.846741	0.670601	0.558788	3	2
Psd4	25.861	16.7205	14.5691	45.9436	55.9831	50.6328	44.4246	33.5201	-0.62916	-0.827866	0.829086	1.11421	0.969294	0.780581	0.374248	3	2
Echs1	26.5668	27.8604	20.5145	12.5363	10.3116	11.2582	18.0054	21.1174	0.0685915	-0.37298	-1.08351	-1.36536	-1.23865	-0.561195	-0.331192	3	2
Pvrl2	4.95712	9.26704	7.57297	11.4763	15.3696	14.3142	14.4529	13.7106	0.902606	0.611357	1.21108	1.63251	1.52987	1.54378	1.46772	3	2
Adipor2	33.1333	45.1928	31.2365	17.8649	14.2198	16.6848	19.2765	26.2315	0.447811	-0.0850491	-0.891154	-1.22038	-0.989748	-0.781439	-0.336982	3	2
Lass5	25.1491	21.3896	19.5646	13.4833	9.23351	10.4851	10.2791	13.3837	-0.233597	-0.362261	-0.899333	-1.44556	-1.26217	-1.29079	-0.91003	3	2
Uvrag	12.1528	22.7495	23.4212	9.17323	4.18754	6.25322	13.3125	12.5934	0.904546	0.946526	-0.405787	-1.53711	-0.958618	0.131493	0.0513791	3	2
Sh3bp5	6.99184	4.6814	4.14477	14.6358	21.0678	17.9289	12.7115	12.1657	-0.578732	-0.75438	1.06576	1.5913	1.35854	0.86239	0.799075	3	2
Mef2d	28.4384	51.9319	43.3495	20.0361	12.3601	14.0571	17.0803	20.6573	0.868781	0.608175	-0.505239	-1.20215	-1.01654	-0.735507	-0.461189	3	2
Lpcat2	20.6576	14.338	22.7686	32.3778	45.5908	42.3242	33.2209	34.1856	-0.526829	0.140373	0.648332	1.14207	1.03481	0.685419	0.726716	3	2
Kcnab2	23.945	15.078	13.6507	10.9001	8.48675	9.11009	12.9519	14.4002	-0.667279	-0.81075	-1.13538	-1.49644	-1.39419	-0.886561	-0.733636	3	2
Ext1	9.09377	7.53422	8.06537	22.0064	24.4254	19.8235	16.2224	14.4328	-0.27142	-0.173138	1.27497	1.42543	1.12426	0.835037	0.666401	3	2
Trip10	23.125	28.3476	26.0607	43.7035	49.6731	37.537	29.6196	24.2811	0.293773	0.172422	0.918295	1.10301	0.69886	0.357099	0.0703804	3	2
Rab5a	26.9406	38.5107	42.0367	49.5765	54.5552	47.9411	39.567	37.5795	0.515477	0.641867	0.879874	1.01793	0.831481	0.554516	0.480164	3	2
Pdcd10	22.5158	24.5129	28.0324	43.2001	47.2202	42.6876	33.5869	29.4051	0.122603	0.316158	0.940097	1.06847	0.922879	0.576961	0.385129	3	2
Spint1	21.2512	15.4467	14.6487	9.39268	7.93449	8.80116	14.9031	19.331	-0.460246	-0.536772	-1.17794	-1.42133	-1.27178	-0.511932	-0.136628	3	2
Dock7	15.4799	11.7908	11.9376	6.14072	5.1424	7.08333	7.17553	12.5159	-0.392735	-0.374883	-1.33392	-1.58988	-1.1279	-1.10924	-0.306634	3	2
Map3k5	6.92996	2.77125	3.35783	16.0973	18.9121	18.546	15.2225	13.9564	-1.32231	-1.04532	1.2159	1.44839	1.42019	1.13529	1.01001	3	2
Rab11fip5	16.8818	24.93	15.0129	7.6025	6.21599	6.40529	7.36089	8.91501	0.562414	-0.169266	-1.15092	-1.44141	-1.39813	-1.19752	-0.92116	3	2
Pigf	12.6013	16.1714	14.4748	21.3793	28.5709	27.6967	16.9569	22.5119	0.359872	0.199971	0.762642	1.18097	1.13614	0.4283	0.837115	3	2
Urod	21.4662	20.4888	16.7019	15.8972	8.85379	11.2001	13.8854	17.9975	-0.0672313	-0.362055	-0.433294	-1.2777	-0.938555	-0.628498	-0.25427	3	2
Card9	21.4991	22.7028	20.5974	12.3807	8.8294	9.51713	13.1828	15.0383	0.078594	-0.061814	-0.796183	-1.28389	-1.17568	-0.705619	-0.515635	3	2
Dapk1	22.715	24.7603	21.9755	11.6585	9.51057	10.4645	12.8609	17.2976	0.124383	-0.0477493	-0.962263	-1.25604	-1.11814	-0.820654	-0.393073	3	2
Dlgap4	18.7616	18.5084	21.623	36.5418	38.8076	35.1038	33.6204	24.9215	-0.0196027	0.204784	0.961765	1.04856	0.903844	0.841554	0.409608	3	2
Agfg1	16.5584	11.9195	19.0929	31.7557	35.5631	28.3909	22.1873	21.0907	-0.47424	0.205473	0.939452	1.10282	0.777865	0.422171	0.349044	3	2
St7	3.77138	3.28722	5.24949	9.10388	12.3998	10.761	8.57258	6.2262	-0.198225	0.477085	1.27139	1.71715	1.51265	1.18464	0.723259	3	2
Pkp4	7.71114	5.87116	6.89929	16.9345	19.8005	18.358	13.8745	9.91635	-0.393299	-0.160496	1.13495	1.36052	1.25139	0.84742	0.362865	3	2
Acss2	22.6465	17.0877	15.51	13.257	9.85002	11.4582	19.8344	25.5303	-0.40633	-0.546089	-0.772534	-1.20109	-0.982908	-0.191283	0.172922	3	2
Mta3	14.2312	25.557	19.0284	8.92455	5.62114	6.32985	8.20988	10.8896	0.844661	0.419097	-0.673206	-1.34012	-1.16881	-0.793624	-0.386106	3	2
Rnf166	29.9686	27.4463	18.7273	15.1344	13.5753	13.7643	15.7164	14.8746	-0.12684	-0.678309	-0.98562	-1.14247	-1.12252	-0.931181	-1.0106	3	2
Ube2j2	13.605	21.6879	25.6449	28.4061	28.5281	22.6432	21.0985	18.6005	0.672753	0.914535	1.06206	1.06825	0.734941	0.633003	0.451204	3	2
Ergic1	33.4683	18.7777	15.8758	16.918	15.599	18.4167	22.0577	22.9898	-0.833775	-1.07597	-0.984236	-1.10134	-0.861781	-0.601513	-0.541801	3	2
Fhod1	13.4321	6.60821	4.90475	4.50273	4.48636	5.25872	10.1932	15.5549	-1.02335	-1.45343	-1.57681	-1.58207	-1.3529	-0.398078	0.211684	3	2
Asns	6.98079	8.83803	11.1397	12.6714	18.1666	14.2887	9.51086	5.17752	0.340335	0.674248	0.860114	1.37983	1.03341	0.446185	-0.431129	3	2
Glo1	23.8388	17.1977	12.9666	13.1865	10.3591	12.6016	15.1909	16.2614	-0.471096	-0.878511	-0.85425	-1.20241	-0.919705	-0.650104	-0.55186	3	2
Rmnd5b	17.487	14.2083	9.76112	6.94973	6.45081	7.0342	6.9157	7.27116	-0.299549	-0.841164	-1.33125	-1.43873	-1.31382	-1.33834	-1.26603	3	2
Tnfrsf21	25.9888	36.4899	28.3565	18.9489	12.6857	13.9328	21.6069	25.0365	0.489607	0.125789	-0.455776	-1.03469	-0.899405	-0.266398	-0.0538571	3	2
Parp1	11.7505	13.5339	10.0316	6.49625	3.95648	4.50524	5.10071	7.16672	0.203855	-0.22817	-0.855043	-1.57043	-1.38305	-1.20395	-0.713337	3	2
B4galt1	28.8933	33.25	25.2774	18.6454	14.2858	16.5484	23.7926	30.0381	0.202619	-0.192887	-0.631915	-1.01615	-0.804043	-0.280222	0.0560586	3	2
Agl	10.2193	10.9273	7.73692	4.63564	3.15778	3.74776	4.47571	6.65264	0.0966406	-0.401465	-1.14046	-1.69431	-1.4472	-1.19111	-0.619298	3	2
Ap2a2	23.9408	26.6962	20.4356	13.5277	11.1662	12.734	14.5245	16.8185	0.157163	-0.228387	-0.823555	-1.10033	-0.910786	-0.720983	-0.509422	3	2
Sepn1	20.5741	14.5851	11.6383	11.9128	8.88202	10.529	11.8523	17.2885	-0.496334	-0.821949	-0.788317	-1.21187	-0.966461	-0.795662	-0.251017	3	2
Fmnl3	13.7951	10.8405	9.21586	5.96939	5.38409	7.5941	11.7964	14.3575	-0.347725	-0.581965	-1.2085	-1.35738	-0.861205	-0.225809	0.0576486	3	2
Cno	11.6393	9.49671	11.4028	22.3166	24.5503	19.6367	23.5816	14.7574	-0.293505	-0.0296162	0.939113	1.07674	0.754548	1.01866	0.342434	3	2
Smad2	12.5766	11.235	12.4394	22.72	26.3005	23.7244	16.9566	15.7669	-0.162742	-0.0158251	0.853221	1.06435	0.91563	0.431105	0.326157	3	2
Csnk2a2	9.9	11.6561	12.7063	20.3688	21.605	18.8566	15.1356	10.2408	0.235585	0.360044	1.04086	1.12586	0.929569	0.612445	0.048828	3	2
Dguok	13.8309	17.246	13.8862	10.0984	6.07267	8.81358	16.2525	15.8356	0.318367	0.00575682	-0.453768	-1.18749	-0.650095	0.232767	0.195276	3	2
Elavl1	11.6029	11.4352	14.8455	20.4124	24.2037	21.7528	15.3207	13.0124	-0.0210038	0.35554	0.81496	1.06074	0.906716	0.400997	0.165402	3	2
Nt5c2	12.735	10.6469	8.97644	6.3734	4.8886	5.52479	8.78365	11.157	-0.258366	-0.504584	-0.998664	-1.38131	-1.20481	-0.535906	-0.19085	3	2
Polr3gl	11.1924	13.1767	10.749	8.44846	4.36829	5.26532	7.89329	9.02875	0.23547	-0.058317	-0.405759	-1.35738	-1.08793	-0.503821	-0.309921	3	2
Ncoa5	11.8732	6.37135	11.5347	22.8248	24.5376	23.4164	18.2747	12.6173	-0.898038	-0.0417283	0.942893	1.04729	0.97981	0.622139	0.0876944	3	2
Dapp1	10.8293	10.4406	11.8436	6.47105	4.00524	4.32349	5.86176	7.67432	-0.0527354	0.129168	-0.742868	-1.43498	-1.32467	-0.885534	-0.496829	3	2
Pddc1	16.9671	20.9425	16.0267	8.05296	8.02597	11.7821	19.4082	18.3885	0.303694	-0.0822626	-1.07515	-1.07999	-0.526143	0.193926	0.116064	3	2
Rab3d	13.1729	12.3596	9.77352	7.61461	5.2536	5.25808	7.02656	11.3763	-0.0919409	-0.430623	-0.790731	-1.32619	-1.32496	-0.906683	-0.211542	3	2
Pnkp	17.7597	22.2218	17.342	11.9268	8.38572	9.0598	13.6991	17.0141	0.323368	-0.0343369	-0.5744	-1.0826	-0.971056	-0.374526	-0.0618764	3	2
Fkbp4	23.7602	14.1268	11.801	13.4668	11.5072	11.877	20.046	21.9599	-0.750112	-1.00964	-0.81914	-1.04601	-1.00038	-0.245233	-0.113675	3	2
Hsd17b4	25.6513	14.2641	13.4033	12.9814	12.2507	12.457	14.0438	16.1091	-0.846643	-0.936444	-0.982586	-1.06617	-1.04208	-0.869099	-0.671156	3	2
Prkx	9.97024	10.5845	15.034	18.7665	20.8527	18.476	10.9594	13.6156	0.086253	0.592529	0.912459	1.06453	0.889952	0.136469	0.44956	3	2
Purb	11.5708	9.04138	11.8635	20.6486	23.3846	22.4911	15.3617	12.3105	-0.355874	0.0360411	0.835555	1.01507	0.958866	0.408849	0.0894007	3	2
Eif4g3	18.4739	13.3516	11.9662	9.0516	9.0454	13.0333	18.1933	19.3819	-0.468476	-0.626523	-1.02924	-1.03023	-0.503286	-0.0220812	0.0692215	3	2
Ptges2	6.12158	4.13398	4.27712	10.1799	14.0946	13.5092	12.8149	10.5671	-0.566373	-0.517264	0.733747	1.20317	1.14197	1.06585	0.787604	3	2
Cirbp	15.1535	20.0427	19.4718	12.7353	7.44161	7.96211	12.4444	15.2426	0.403426	0.361735	-0.250818	-1.02596	-0.928428	-0.284154	0.00845796	3	2
Appbp2	7.98951	13.1301	13.7546	16.5322	16.7968	14.1007	7.49642	8.58086	0.716699	0.783735	1.0491	1.07201	0.819588	-0.0919052	0.103015	3	2
Topors	7.99283	12.4338	9.55526	13.1959	17.0359	14.5727	9.5904	9.61196	0.637489	0.257589	0.723311	1.0918	0.86649	0.262885	0.266124	3	2
Nfyb	7.60168	10.1016	9.72048	13.751	16.1599	14.5303	9.55196	8.49279	0.410194	0.354709	0.855146	1.08803	0.934674	0.329479	0.15992	3	2
Zfp385a	16.2592	16.533	13.023	9.29437	8.10714	10.0936	15.652	18.9934	0.0240923	-0.320194	-0.806827	-1.00399	-0.687815	-0.0549093	0.224242	3	2
Wdr37	8.00072	10.2187	9.41111	14.6331	16.258	15.4196	10.471	10.3546	0.35301	0.234235	0.871034	1.02295	0.946564	0.388197	0.37207	3	2
Cpsf3	14.9991	8.7984	7.3708	7.35631	7.08942	9.59816	13.4555	14.2174	-0.769563	-1.02498	-1.02782	-1.08114	-0.644046	-0.15668	-0.0772183	3	2
Neurl2	12.2231	15.2719	13.6757	7.74457	5.58447	6.24521	6.35943	7.1959	0.321269	0.162004	-0.658353	-1.13012	-0.968788	-0.942641	-0.764363	3	2
Tmem173	15.1226	15.1085	11.9656	7.68279	7.33712	7.54382	10.8364	12.2015	-0.00134577	-0.337813	-0.977004	-1.04342	-1.00334	-0.480821	-0.309648	3	2
Tns3	11.8702	10.2976	10.2992	7.6204	5.37935	5.47689	8.06285	8.93586	-0.205036	-0.204812	-0.639406	-1.14184	-1.11592	-0.557982	-0.409666	3	2
Asf1a	5.09936	6.64118	6.36221	8.26154	11.0684	9.85044	10.8228	8.68636	0.381123	0.319212	0.696095	1.11806	0.949872	1.08569	0.768436	3	2
Stim2	5.53969	5.0195	7.83868	11.4091	12.1135	9.941	6.36984	6.35556	-0.142262	0.500805	1.04231	1.12874	0.843586	0.201452	0.198214	3	2
Pkn2	6.0441	10.8779	10.1345	11.7958	12.353	11.0093	7.07635	7.52598	0.847801	0.745675	0.964674	1.03126	0.865123	0.227478	0.316352	3	2
Kctd17	10.9526	10.9405	8.78501	8.16841	5.2489	6.49365	7.10132	8.82433	-0.00159471	-0.318158	-0.423146	-1.06119	-0.754172	-0.625114	-0.311715	3	2
Pcgf3	6.03747	4.61494	5.64144	11.4793	12.5811	11.0443	6.80186	8.09037	-0.387632	-0.0978807	0.927019	1.05924	0.871286	0.171985	0.422262	3	2
Sdad1	6.12859	8.27295	6.98033	11.5664	12.5143	11.1116	5.49075	3.65039	0.432847	0.18774	0.916313	1.02995	0.858439	-0.158552	-0.747505	3	2
Vti1a	6.2779	4.77827	3.99975	3.57295	3.04488	6.07366	10.7412	11.2236	-0.393794	-0.650372	-0.813166	-1.0439	-0.0477159	0.774801	0.838182	3	2
Cd69	0.851273	13.7797	19.4511	29.6155	90.3566	151.339	143.436	53.5848	4.01678	4.51409	5.12059	6.72986	7.47395	7.39657	5.97606	4	2
Slfn8	3.97162	1.59333	3.83856	24.4933	118.44	153.593	137.588	104.417	-1.31768	-0.0491624	2.62459	4.89828	5.27324	5.11448	4.71649	4	2
Parp14	8.13928	5.51288	6.41933	33.8534	156.641	200.562	161.605	125.91	-0.562095	-0.342478	2.05633	4.26642	4.623	4.31143	3.95135	4	2
Slc1a2	0.563577	0.214855	0.345321	6.13202	33.5605	43.5968	37.1024	39.4327	-1.39125	-0.706675	3.44368	5.89601	6.27347	6.04076	6.12864	4	2
Ifih1	3.12017	2.23639	15.2153	32.6617	55.4406	78.053	74.5966	50.9854	-0.480453	2.28583	3.3879	4.15125	4.64476	4.57941	4.03039	4	2
Mmp13	93.1171	71.4871	107.951	288.692	451.591	619.052	521.65	423.851	-0.381363	0.213259	1.63241	2.2779	2.73294	2.48596	2.18644	4	2
Hamp	0.318241	1.21541	1.14931	17.398	19.1231	25.2114	21.2262	11.7277	1.93325	1.85258	5.77266	5.90905	6.30781	6.05958	5.20366	4	2
Ccl22	133.44	237.73	372.027	564.473	707.43	750.138	660.902	664.42	0.833133	1.47922	2.08071	2.4064	2.49096	2.30825	2.3159	4	2
Ntng2	7.72207	13.1118	22.706	55.0292	93.7749	104.294	99.832	79.1735	0.763806	1.55601	2.83314	3.60214	3.75552	3.69244	3.35796	4	2
Fscn1	47.0777	48.5587	87.1854	161.866	282.475	298.499	258.982	206.339	0.044686	0.889043	1.78168	2.58501	2.66461	2.45974	2.1319	4	2
Dtx3l	5.902	8.54943	5.28425	15.6976	67.9815	81.0782	65.2111	47.5222	0.534624	-0.159505	1.41127	3.52587	3.78004	3.46584	3.00933	4	2
Eif2ak2	6.55796	6.91445	6.73868	11.8226	59.4253	84.8911	76.5183	58.1032	0.0763674	0.0392189	0.850228	3.17976	3.69429	3.54449	3.1473	4	2
Parp9	7.36513	6.74357	4.11391	14.9556	66.6186	82.357	63.1219	48.901	-0.127198	-0.840201	1.0219	3.17714	3.48311	3.09936	2.73108	4	2
Jak2	26.5657	37.8437	51.6548	121.157	169.185	170.407	117.812	131.719	0.510488	0.959338	2.18924	2.67097	2.68135	2.14885	2.30983	4	2
Tor1aip2	24.8413	26.1123	27.8579	58.2204	153.461	166.32	132.613	90.0986	0.0719889	0.165346	1.22878	2.62706	2.74315	2.41641	1.85876	4	2
Ccnd2	1.89381	1.52905	3.26121	12.3141	27.3911	36.8779	28.8322	20.353	-0.308656	0.784116	2.70095	3.85434	4.28339	3.92832	3.42588	4	2
Cxcr4	105.859	127.173	76.6494	28.9016	13.8433	13.0363	17.0868	32.4358	0.264648	-0.465798	-1.87292	-2.93488	-3.02154	-2.63119	-1.70649	4	2
Scd2	73.8976	77.7736	53.3054	23.8684	10.665	9.61866	15.1121	37.6888	0.073753	-0.471246	-1.63043	-2.79264	-2.94162	-2.28982	-0.971392	4	2
Il12b	3.36885	10.6528	23.6665	17.8871	29.5748	38.4104	19.5631	23.7044	1.6609	2.81252	2.40859	3.13404	3.51117	2.53781	2.81483	4	2
Dstn	137.91	174.624	212.667	336.695	422.288	435.994	335.258	294.691	0.340525	0.624869	1.28772	1.6145	1.66058	1.28154	1.09548	4	2
Lox	1.26145	1.5985	2.7245	9.81617	15.3396	20.4971	13.1914	18.1552	0.341636	1.11091	2.96008	3.60411	4.02226	3.38644	3.84723	4	2
Trim21	3.23858	2.05065	1.09455	5.29317	25.5017	34.5849	23.7047	16.0626	-0.65928	-1.56502	0.708771	2.97716	3.41671	2.87174	2.31027	4	2
Zc3hav1	23.9359	32.0293	48.2686	64.4626	106.267	107.335	67.888	58.2031	0.420216	1.01191	1.42929	2.15045	2.16487	1.50398	1.28192	4	2
B3gnt2	22.049	39.7377	55.5607	72.4004	95.8787	96.3595	64.6229	44.9324	0.849795	1.33335	1.71528	2.1205	2.12771	1.55133	1.02704	4	2
Tor1aip1	23.7796	16.797	21.959	32.8057	85.1084	105.97	95.3241	66.8799	-0.501521	-0.114912	0.464222	1.83958	2.15586	2.00312	1.49185	4	2
Clic4	102.029	91.7943	173.104	230.093	298.481	305.653	259.356	204.034	-0.152503	0.76266	1.17324	1.54866	1.58292	1.34595	0.99983	4	2
Adar	9.76126	5.34786	4.25724	12.1182	45.0698	55.3791	52.4011	42.7709	-0.868106	-1.19715	0.312036	2.20702	2.5042	2.42446	2.13149	4	2
Mafb	33.2118	53.8984	50.0715	9.74741	5.49073	5.20139	6.73024	9.811	0.698547	0.592294	-1.76861	-2.59663	-2.67473	-2.30297	-1.75922	4	2
Gja1	0.804098	1.60705	3.26343	7.27127	12.9689	13.6883	10.2489	9.2545	0.998972	2.02095	3.17676	4.01154	4.08943	3.67195	3.52471	4	2
Trim25	38.6578	104.317	70.8104	53.8009	128.015	133.202	99.6451	85.7491	1.43214	0.873202	0.476871	1.72748	1.78478	1.36604	1.14936	4	2
Ripk2	8.5032	24.0434	38.0212	35.9614	35.9912	43.3912	27.3521	19.2086	1.49956	2.16073	2.08037	2.08157	2.35132	1.68557	1.17567	4	2
Ddx24	17.0766	16.082	18.8718	33.4884	68.9201	72.9992	56.9795	44.9164	-0.0865739	0.144211	0.971641	2.0129	2.09586	1.73842	1.39522	4	2
March5	20.0586	28.8697	27.8524	29.5819	58.9962	81.0309	76.8	55.3405	0.525335	0.473581	0.560494	1.5564	2.01425	1.93689	1.46411	4	2
Plau	46.4549	39.3715	49.366	23.9182	9.1744	8.8831	14.2894	10.2089	-0.238679	0.087687	-0.957722	-2.34015	-2.3867	-1.70089	-2.186	4	2
Dnajb6	53.0219	91.4949	103.264	130.133	157.05	161.485	148.335	101.711	0.787103	0.961677	1.29533	1.56656	1.60674	1.4842	0.939815	4	2
Slc11a2	12.7003	11.1674	15.9308	33.6919	52.1877	55.5804	54.1428	45.1015	-0.185569	0.326956	1.40754	2.03885	2.12971	2.09191	1.82831	4	2
Glul	160.957	122.827	131.167	107.971	62.8139	51.9377	72.8463	108.044	-0.390048	-0.295271	-0.576031	-1.35752	-1.63182	-1.14375	-0.575056	4	2
Ccr7	144.062	227.114	271.255	251.71	340.137	352.629	312.466	310.509	0.656727	0.91296	0.805073	1.23943	1.29146	1.11701	1.10795	4	2
Ucp2	300.106	196.023	161.126	127.865	116.714	113.283	123.758	169.736	-0.614449	-0.897283	-1.23085	-1.36249	-1.40554	-1.27795	-0.82218	4	2
Nt5dc2	41.537	18.5425	16.4383	16.5534	10.5255	8.1684	19.3256	24.8785	-1.16356	-1.33734	-1.32727	-1.98051	-2.34627	-1.10388	-0.739498	4	2
Mgst1	212.648	153.888	141.048	117.963	97.2695	80.0929	98.8803	120.163	-0.466587	-0.592281	-0.850133	-1.12841	-1.40872	-1.10471	-0.823475	4	2
Naa25	5.54788	4.07609	3.19141	5.4397	22.969	32.9078	24.5719	14.7343	-0.444751	-0.797743	-0.0284095	2.04968	2.56842	2.147	1.40917	4	2
Pnpt1	5.18793	3.44214	2.87519	3.93492	20.382	29.9386	23.9523	16.9171	-0.591853	-0.851502	-0.398825	1.97406	2.52878	2.20693	1.70525	4	2
Ppp1r15b	22.1161	25.2655	32.8929	57.6214	71.2841	71.5588	51.7387	44.4702	0.192072	0.572679	1.38151	1.68848	1.69403	1.22615	1.00774	4	2
Pdxk	20.0728	10.6119	8.28644	5.16784	2.3587	2.10409	3.12856	5.53025	-0.919559	-1.27642	-1.95761	-3.08918	-3.25397	-2.68167	-1.85983	4	2
Myd88	27.2066	23.8034	32.296	44.9335	75.685	82.8519	70.8849	55.2209	-0.192789	0.247399	0.723835	1.47605	1.60658	1.38152	1.02126	4	2
Cerk	32.687	23.0043	17.7971	10.5759	6.80598	6.71573	10.8227	18.1528	-0.506813	-0.877075	-1.62794	-2.26384	-2.2831	-1.59466	-0.848525	4	2
Slc16a1	5.82455	8.89508	9.97773	12.681	25.2678	29.5058	14.6336	8.95069	0.610861	0.776565	1.12245	2.11708	2.34078	1.32907	0.619852	4	2
Fam46a	6.37067	9.07529	9.27423	14.2358	27.6062	29.253	19.507	16.6911	0.510499	0.541782	1.16001	2.11548	2.19907	1.61447	1.38956	4	2
Mafk	9.83822	26.6185	27.4179	22.0806	33.6518	36.1364	30.9354	17.7331	1.43596	1.47865	1.16631	1.77421	1.87698	1.65279	0.849976	4	2
Azi2	13.6978	12.0345	12.2321	16.1866	36.0187	45.4827	41.3405	37.1957	-0.186768	-0.163272	0.240856	1.3948	1.73137	1.59361	1.44119	4	2
Dcp2	4.56256	3.17748	2.5765	4.86247	18.9534	24.0258	14.9927	11.0349	-0.52196	-0.824431	0.0918458	2.05454	2.39667	1.71634	1.27416	4	2
2400003C14Rik	30.5515	47.5471	65.1827	71.4779	74.1519	78.578	63.8689	53.5801	0.638114	1.09325	1.22625	1.27924	1.36288	1.06387	0.810454	4	2
Lat2	39.9178	38.4589	30.7873	29.0227	14.4938	12.124	16.2606	16.4548	-0.0537147	-0.374697	-0.45985	-1.4616	-1.71917	-1.29565	-1.27852	4	2
Sipa1l1	5.77938	10.6585	10.1453	15.9726	16.0784	23.4618	20.5833	17.4326	0.883018	0.811825	1.46661	1.47614	2.02133	1.83249	1.5928	4	2
Klc4	14.3775	15.3606	13.1579	10.1314	3.20218	2.55982	3.83774	6.26401	0.0954217	-0.127884	-0.504979	-2.16669	-2.4897	-1.90548	-1.19865	4	2
Timp1	7.26706	10.9808	17.6817	21.382	22.131	25.6816	22.2839	22.222	0.595539	1.28281	1.55695	1.60662	1.82129	1.61656	1.61254	4	2
Birc3	35.5544	66.2383	78.5217	69.2445	78.4666	83.4476	76.7014	81.5913	0.897638	1.14306	0.961671	1.14205	1.23084	1.10922	1.19839	4	2
Rab10	44.4025	47.8435	53.298	77.6775	99.0915	102.042	85.6237	86.972	0.107682	0.26344	0.806856	1.15812	1.20045	0.947369	0.96991	4	2
Mthfd2	23.031	28.3692	31.359	38.2358	57.9187	58.8734	58.4086	54.3627	0.300748	0.445303	0.731347	1.33045	1.35404	1.3426	1.23904	4	2
Mical1	14.8592	13.2943	9.61125	5.32067	2.72383	2.52118	4.02319	5.83194	-0.160549	-0.62856	-1.48168	-2.44765	-2.55919	-1.88494	-1.34931	4	2
Arl1	64.3367	63.4596	69.5141	91.7888	127.873	136.006	134.924	127.888	-0.0198035	0.111664	0.512676	0.990998	1.07996	1.06843	0.991167	4	2
Trim56	2.65147	1.69185	1.402	3.6762	11.9628	15.3655	12.4344	7.53922	-0.648191	-0.919306	0.471423	2.17369	2.53483	2.22947	1.50762	4	2
Sirpb1a	44.9647	26.2551	25.7862	16.7603	15.7035	15.3605	17.7352	27.5523	-0.776195	-0.802194	-1.42374	-1.51771	-1.54957	-1.34218	-0.70662	4	2
Plcb2	14.0712	14.11	10.4088	7.28112	3.56947	2.58664	3.00277	4.25185	0.00397262	-0.434942	-0.950513	-1.97896	-2.44359	-2.22838	-1.72658	4	2
Kpna4	38.4372	41.9175	56.9229	67.6187	83.8363	86.1507	69.8216	64.6715	0.125049	0.566506	0.814919	1.12507	1.16436	0.86117	0.750627	4	2
Tcf4	3.47072	6.15836	5.63581	4.67243	10.6054	16.417	12.5288	9.16134	0.827311	0.699388	0.428938	1.61149	2.24188	1.85194	1.40032	4	2
Lrrc59	53.3219	34.5072	49.7103	85.9469	110.64	113.299	105.904	91.0833	-0.627831	-0.101183	0.688717	1.05307	1.08734	0.989957	0.772458	4	2
Pdgfb	20.0884	14.7909	13.1625	21.4611	7.98012	5.43866	6.75302	8.5308	-0.441653	-0.609929	0.0953614	-1.33188	-1.88504	-1.57276	-1.23561	4	2
Sav1	31.154	25.2485	31.2518	47.4216	69.406	72.2586	51.7089	42.6575	-0.30322	0.00452188	0.606127	1.15564	1.21375	0.730995	0.453382	4	2
Actn1	76.9348	40.1569	49.2358	100.922	144.336	155.167	132.239	96.0148	-0.937988	-0.643929	0.391532	0.907723	1.01211	0.781439	0.31962	4	2
Ccdc86	6.90463	4.38248	5.45432	11.8019	22.9073	22.9421	20.797	19.8696	-0.655817	-0.340165	0.773383	1.73017	1.73236	1.59074	1.52493	4	2
Mbp	16.5002	19.8991	10.2107	6.14512	4.56679	3.93232	4.1015	7.44947	0.27022	-0.692402	-1.42497	-1.85323	-2.06903	-2.00826	-1.14727	4	2
Il20rb	3.37473	5.30667	4.057	5.98841	12.414	14.7985	11.4703	10.0011	0.653035	0.265641	0.827401	1.87912	2.13261	1.76506	1.56731	4	2
Tra2a	37.8919	70.4963	68.3144	62.9326	76.6505	80.3651	73.2121	50.8752	0.895658	0.8503	0.731918	1.01641	1.08468	0.950193	0.425073	4	2
Aff1	10.8669	14.4914	19.6935	16.1221	21.5434	30.8013	28.3016	20.0952	0.415257	0.857779	0.569099	0.987306	1.50305	1.38094	0.88691	4	2
Mina	9.8782	4.6312	4.68325	11.2664	25.052	30.754	24.1603	15.0456	-1.09286	-1.07674	0.189707	1.34261	1.63845	1.29032	0.607022	4	2
Cebpa	34.7201	18.849	13.2927	18.6853	13.793	12.1052	16.2692	17.9744	-0.881283	-1.38514	-0.893867	-1.33183	-1.52014	-1.09363	-0.949827	4	2
Slc27a1	26.6302	19.1651	16.3394	13.3686	9.79288	8.89147	13.7832	19.152	-0.474582	-0.704708	-0.994215	-1.44326	-1.58257	-0.950152	-0.475568	4	2
D1Ertd622e	27.6102	14.1609	10.8076	14.3963	49.7335	64.7448	59.4514	40.0505	-0.963288	-1.35316	-0.939503	0.849017	1.22956	1.10651	0.536619	4	2
Nod2	4.04897	4.19481	8.65986	11.2615	14.0084	14.6301	14.3624	13.4316	0.0510505	1.09679	1.47577	1.79067	1.85331	1.82667	1.73	4	2
St3gal3	8.9675	11.5855	12.0625	10.8804	23.5705	26.92	16.4008	15.4062	0.369543	0.427751	0.278954	1.3942	1.5859	0.870988	0.780733	4	2
E2f5	4.83683	3.0267	4.59966	8.8461	16.2979	17.8072	14.7981	10.786	-0.676316	-0.0725346	0.87098	1.75255	1.88033	1.61328	1.15703	4	2
Slc44a1	9.94991	8.98775	8.70426	18.8798	26.8072	28.8382	14.8801	15.3286	-0.146723	-0.192962	0.924088	1.42987	1.53523	0.580629	0.623471	4	2
Ica1	8.02977	13.4777	12.6931	8.23698	2.0771	1.64563	2.10507	3.94442	0.747144	0.660614	0.0367568	-1.95079	-2.28672	-1.93149	-1.02555	4	2
Dach1	4.08412	3.13568	3.04197	3.55869	8.61242	16.7216	15.3111	11.3331	-0.381247	-0.425019	-0.198679	1.07639	2.03362	1.90648	1.47245	4	2
Aim2	13.2766	26.6289	25.6556	14.7147	22.0492	33.7046	31.9691	21.2594	1.00411	0.950388	0.148372	0.731841	1.34406	1.26779	0.679215	4	2
Sap25	44.7282	36.8053	26.6511	20.7419	20.3255	18.8245	26.4647	33.3413	-0.281271	-0.74699	-1.10864	-1.13789	-1.24857	-0.757115	-0.423874	4	2
Tlk2	6.28803	6.8455	7.89704	11.169	18.0465	20.0743	14.5382	12.131	0.122548	0.328704	0.82882	1.52104	1.67467	1.20917	0.948018	4	2
Epb4.1	14.3193	21.4137	20.2934	11.6755	4.74696	4.42574	6.48682	9.66597	0.580573	0.50305	-0.294477	-1.59289	-1.69397	-1.14238	-0.566975	4	2
Carhsp1	10.5461	11.5438	11.706	14.6313	23.6391	28.1205	28.0085	22.1543	0.130409	0.150539	0.472348	1.16447	1.41491	1.40916	1.07088	4	2
Abtb1	23.4014	34.6141	25.3947	15.1322	11.0689	8.62272	9.29978	10.8839	0.564765	0.117933	-0.628973	-1.08008	-1.44038	-1.33133	-1.1044	4	2
Inpp5b	8.67141	6.21327	5.95618	8.78131	20.9898	25.413	18.4515	17.616	-0.480914	-0.541879	0.0181696	1.27535	1.55123	1.0894	1.02255	4	2
Cmtm6	38.4281	35.7802	29.1247	31.3531	55.3332	78.3356	78.0189	62.6773	-0.103	-0.399918	-0.293554	0.525984	1.02751	1.02166	0.705781	4	2
Fnbp4	14.4672	18.4317	15.365	18.874	33.0682	35.0457	27.7901	20.2483	0.349403	0.086862	0.383614	1.19266	1.27645	0.941785	0.485015	4	2
Wdr91	19.6028	23.6031	23.9331	17.2538	8.35981	7.06278	9.09411	11.3231	0.267917	0.287948	-0.184146	-1.22952	-1.47275	-1.10806	-0.791791	4	2
Vcpip1	7.85686	7.28706	7.44558	11.3143	21.3226	22.8269	13.692	13.6727	-0.108616	-0.0775686	0.526123	1.44036	1.53871	0.801308	0.799273	4	2
Gmnn	10.0064	13.2628	10.0113	3.90875	2.53787	2.38882	4.43797	7.78415	0.406462	0.000706296	-1.35614	-1.97923	-2.06655	-1.17295	-0.362312	4	2
Plekhf2	13.6969	15.1863	10.4294	13.7782	26.5182	33.5014	31.8186	26.2575	0.148921	-0.393193	0.00853802	0.953133	1.29037	1.21602	0.93888	4	2
Dst	6.02486	4.4583	4.13101	5.26009	13.2282	19.1397	16.4363	14.8998	-0.434434	-0.544433	-0.19584	1.13462	1.66757	1.44789	1.30629	4	2
Ythdf1	13.2519	18.222	21.7817	26.4902	30.3234	31.0427	25.0549	19.4666	0.459482	0.716917	0.99926	1.19423	1.22805	0.918894	0.554802	4	2
Cmas	29.0794	25.323	22.7004	20.5597	12.9664	11.9869	16.4565	16.1426	-0.199549	-0.35728	-0.500178	-1.16522	-1.27854	-0.82134	-0.849125	4	2
Acvr1b	14.1487	13.7193	7.91146	15.8864	31.2677	32.8057	29.321	31.9598	-0.0444626	-0.838654	0.167123	1.144	1.21328	1.05126	1.17559	4	2
Myo1e	24.1662	13.9045	20.6426	19.7472	9.70757	9.52323	14.8543	16.6541	-0.797439	-0.227366	-0.291343	-1.31581	-1.34347	-0.70211	-0.537113	4	2
Tlr7	13.3156	8.65801	17.5711	17.8861	25.1577	31.0137	29.2215	27.6651	-0.62101	0.400087	0.425721	0.917883	1.21979	1.13391	1.05495	4	2
Smg7	9.97161	14.596	10.5307	13.3519	21.2786	24.9945	18.7573	15.9618	0.549675	0.078703	0.421147	1.0935	1.32571	0.911554	0.678725	4	2
Trpm4	3.96858	3.00421	2.99899	8.76855	12.3303	13.066	11.6995	10.4294	-0.401637	-0.404146	1.14372	1.63551	1.71912	1.55975	1.39396	4	2
Klhl21	12.5965	21.521	14.1558	6.58529	4.66406	4.23879	5.57511	7.16047	0.772722	0.16837	-0.935704	-1.43336	-1.5713	-1.17595	-0.814897	4	2
Gng2	15.3158	15.4437	12.2867	7.95197	5.70042	5.07087	5.39974	6.24119	0.0119977	-0.317923	-0.945637	-1.42588	-1.59472	-1.50406	-1.29513	4	2
Acadm	25.5187	22.4106	19.8997	16.6094	10.7787	10.7445	12.1973	14.7805	-0.187374	-0.358808	-0.619555	-1.24337	-1.24796	-1.06499	-0.78786	4	2
Xrn2	18.9552	19.9035	15.2099	17.9309	31.3735	40.3116	30.9506	24.5078	0.0704285	-0.317583	-0.0801458	0.726953	1.0886	0.707374	0.370647	4	2
Bcat2	23.5413	29.9284	24.328	17.4624	12.1823	10.5085	13.4724	16.9872	0.346321	0.0474237	-0.430942	-0.950407	-1.16364	-0.805187	-0.470746	4	2
Ppp3ca	27.9841	22.9942	23.3034	20.002	14.739	12.8039	17.4108	22.0663	-0.283337	-0.264067	-0.484463	-0.924969	-1.12802	-0.684625	-0.342763	4	2
Galnt6	21.1097	27.1266	23.1771	17.0585	10.9708	9.12831	9.38358	13.2511	0.361802	0.134794	-0.307415	-0.944237	-1.20949	-1.1697	-0.671794	4	2
Vps37c	12.513	16.3203	24.1115	22.8461	23.6636	26.6677	25.9746	22.0284	0.38324	0.946294	0.86852	0.919242	1.09167	1.05367	0.815937	4	2
N4bp1	18.3789	12.5899	14.1447	21.9209	30.4439	37.392	37.1766	33.9691	-0.545784	-0.377789	0.254257	0.728103	1.02468	1.01634	0.886173	4	2
Calcoco1	13.0017	15.8888	13.3335	11.3505	5.47686	4.75197	6.09152	6.85827	0.28931	0.0363553	-0.195944	-1.24728	-1.4521	-1.09383	-0.922784	4	2
Ranbp2	10.1706	14.5199	13.908	13.758	19.4623	23.345	14.8757	12.2634	0.513627	0.45151	0.435866	0.936277	1.19871	0.548553	0.269954	4	2
Ktn1	8.4133	10.4918	9.52595	14.2901	18.641	19.8102	15.3094	14.5287	0.318519	0.179191	0.764272	1.14774	1.2355	0.863674	0.788162	4	2
Acot13	31.7166	32.6368	29.8279	27.0596	17.1002	15.7498	18.7456	22.7416	0.0412615	-0.0885757	-0.229098	-0.891225	-1.0099	-0.758686	-0.479904	4	2
Cd97	16.0768	9.86999	8.92354	7.00433	6.04936	5.8774	6.73921	11.1491	-0.70386	-0.849292	-1.19866	-1.41013	-1.45173	-1.25433	-0.528053	4	2
Gse1	15.7832	24.5146	13.4599	7.74945	6.55682	6.51388	8.63107	10.8122	0.635251	-0.229722	-1.02622	-1.26732	-1.2768	-0.870778	-0.54573	4	2
A230046K03Rik	11.5429	16.9941	15.311	15.4491	20.6179	24.4651	20.2228	19.3005	0.558028	0.407563	0.420517	0.836892	1.08372	0.808977	0.741632	4	2
Mapre2	9.54527	19.3425	19.1807	19.3816	19.0411	20.3342	17.8006	15.4242	1.01892	1.0068	1.02183	0.996259	1.09105	0.899068	0.692338	4	2
Atg7	19.5719	19.0492	17.7377	11.8978	9.02326	8.57915	10.4825	11.4452	-0.0390534	-0.141965	-0.718089	-1.11706	-1.18988	-0.900801	-0.774041	4	2
Pmm1	12.3966	15.8463	13.8065	10.9602	6.58838	4.7893	5.85812	5.17793	0.354202	0.155403	-0.17767	-0.911949	-1.37206	-1.08143	-1.2595	4	2
Ivd	11.9668	8.89963	7.32141	5.95666	4.44953	4.22933	8.00783	10.1214	-0.42722	-0.708844	-1.00646	-1.42731	-1.50054	-0.579554	-0.241629	4	2
Nr3c1	13.1939	17.6132	21.0021	17.9439	21.3566	26.685	19.4114	18.5962	0.416786	0.670663	0.443622	0.694811	1.01616	0.557033	0.495137	4	2
Prune	16.5348	28.0362	17.8401	8.29179	9.05705	7.52102	9.11692	9.62334	0.761785	0.109618	-0.99575	-0.868392	-1.13651	-0.858887	-0.780896	4	2
Araf	24.2862	19.9216	18.8723	16.972	12.2646	12.085	15.9697	20.2976	-0.285803	-0.363867	-0.51698	-0.985637	-1.00692	-0.6048	-0.258828	4	2
Ubxn2a	7.51066	6.10247	6.85303	13.8594	16.8679	17.426	6.7814	7.91775	-0.299546	-0.132198	0.883853	1.16727	1.21423	-0.147357	0.0761508	4	2
Gtf3a	16.1025	9.86224	9.1576	8.89601	7.55666	7.01204	9.65775	10.1124	-0.707297	-0.814243	-0.856054	-1.09146	-1.19938	-0.737526	-0.671159	4	2
Pla2g15	20.0064	19.3239	15.4313	11.4054	10.1997	9.80338	11.9075	13.5429	-0.0500753	-0.374602	-0.810745	-0.971935	-1.02911	-0.748591	-0.562925	4	2
Sec14l1	13.8588	20.0476	14.2152	9.28012	7.2497	6.71343	9.24392	14.5654	0.532627	0.0366321	-0.578587	-0.934809	-1.04568	-0.584226	0.071743	4	2
Dcp1a	6.63604	7.19549	5.63354	8.10936	13.4004	14.4643	11.1723	10.9658	0.11677	-0.236281	0.289265	1.01388	1.1241	0.751532	0.724617	4	2
Cables2	7.17479	4.97887	4.49691	12.7192	15.243	15.2559	10.4231	9.16763	-0.527118	-0.674003	0.825999	1.08714	1.08836	0.538776	0.353612	4	2
Lrch1	6.40238	8.66719	7.89605	5.66353	11.4449	13.745	11.5637	10.6249	0.436956	0.302523	-0.176907	0.838025	1.10223	0.852923	0.730769	4	2
Scfd1	7.73511	6.88712	7.07488	7.53064	12.839	15.7579	15.1836	15.4166	-0.167521	-0.128716	-0.0386493	0.731039	1.02658	0.97302	0.994991	4	2
Fmr1	5.63968	4.58683	5.35633	6.4148	11.1685	12.6361	9.23945	7.77439	-0.298116	-0.0743685	0.185791	0.98575	1.16387	0.712194	0.463116	4	2
Cpsf2	6.7173	5.3987	4.67139	6.89501	11.1738	13.7703	11.4292	9.99699	-0.315269	-0.52403	0.0376712	0.734167	1.03561	0.766771	0.573612	4	2
Camk1	13.1386	10.1539	8.71404	8.62768	7.55327	6.56628	8.47796	9.18645	-0.371778	-0.592398	-0.606767	-0.798638	-1.00066	-0.632022	-0.516232	4	2
Kremen1	4.84291	4.74059	4.29831	4.19685	6.82993	10.4975	10.1842	8.9782	-0.0308076	-0.172105	-0.206567	0.495997	1.1161	1.07239	0.890552	4	2
Tnfrsf12a	6.20197	8.97626	12.2225	10.2107	3.87112	2.90745	3.69949	3.80882	0.533388	0.978741	0.719283	-0.679976	-1.09297	-0.7454	-0.703382	4	2
Cxcl10	0.89042	49.3573	265.126	292.493	761.407	1228.73	1984.69	625.432	5.79263	8.21798	8.3597	9.73997	10.4304	11.1221	9.45615	6	3
Rsad2	1.69964	2.00827	5.96472	29.6063	617.678	1409.87	1850.35	824.94	0.240724	1.81123	4.1226	8.50548	9.69612	10.0884	8.92292	6	3
Ifit1	0.608265	0.65473	2.06139	11.0227	236.515	523.229	766.379	299.608	0.1062	1.76085	4.17963	8.60302	9.74853	10.2991	8.94416	6	3
Isg15	6.46694	8.61069	70.9633	235.96	712.876	1005.47	2028.26	1196.04	0.413046	3.45592	5.18932	6.78442	7.28057	8.29294	7.53097	6	3
Oasl1	0.505936	0.712415	3.62742	23.2019	114.267	172.109	210.064	151.531	0.493763	2.84192	5.51914	7.81924	8.41015	8.69766	8.22644	6	3
Gbp5	1.19327	2.221	8.32825	20.3074	108.965	181.736	222.59	108.557	0.896289	2.80309	4.08901	6.5128	7.25078	7.54332	6.50739	6	3
Usp18	2.91036	2.54739	2.35158	15.0917	166.073	268.526	342.292	184.182	-0.192178	-0.307567	2.37449	5.83448	6.52772	6.87789	5.98379	6	3
Nos2	30.0501	65.0876	51.3146	57.9532	267.036	561.031	882.635	682.897	1.11501	0.772	0.947519	3.15159	4.22264	4.87638	4.50623	6	3
Zbp1	3.16198	3.31119	2.31585	8.01457	57.4129	107.188	261.581	206.004	0.0665216	-0.449286	1.3418	4.18247	5.08317	6.37029	6.0257	6	3
Socs1	4.89387	11.5098	25.1561	99.2357	186.863	200.589	233.836	161.931	1.23382	2.36186	4.34181	5.25486	5.35712	5.57838	5.04826	6	3
Cd40	6.45011	10.372	47.3416	71.7602	129.577	158.489	187.429	111.905	0.685298	2.87571	3.47579	4.32834	4.61892	4.86088	4.11681	6	3
Gm6904	2.11224	1.96985	1.59328	2.10702	23.2851	53.7516	124.901	104.65	-0.100688	-0.406774	-0.00356976	3.46256	4.66946	5.88587	5.63065	6	3
Igtp	4.91579	3.17231	2.90954	10.9198	92.0213	136.203	161.077	83.4411	-0.63189	-0.756632	1.15145	4.22647	4.79219	5.03418	4.08526	6	3
Oas1a	8.34523	3.73632	4.75549	11.3187	72.4763	115.541	204.883	195.531	-1.15933	-0.811358	0.439685	3.11849	3.79131	4.6177	4.5503	6	3
Trex1	22.0499	37.2037	113.12	181.542	266.756	267.964	320.246	231.102	0.754674	2.35901	3.04146	3.59668	3.6032	3.86034	3.38969	6	3
Slco3a1	3.32188	1.51175	1.78902	11.1197	72.0697	97.5888	104.578	68.2415	-1.13578	-0.89283	1.74305	4.43932	4.87664	4.97644	4.36058	6	3
H2-T22	16.6496	22.2663	18.5929	20.1031	66.4517	131.876	283.034	263.984	0.419374	0.159264	0.27193	1.99682	2.98562	4.08742	3.98689	6	3
Casp4	5.74498	12.8708	43.391	67.5061	99.9759	111.505	123.516	78.9419	1.16373	2.91702	3.55464	4.12121	4.27866	4.42625	3.78042	6	3
Pnp	38.8487	34.7131	70.1849	127.491	244.543	295.977	424.295	320.995	-0.162386	0.853294	1.71446	2.65415	2.92955	3.44913	3.04661	6	3
Ccl2	0.593703	2.32182	12.4282	24.0584	26.7666	21.1521	42.2579	22.1456	1.96744	4.38773	5.34066	5.49455	5.15492	6.15334	5.22113	6	3
Sod2	71.491	117.51	252.251	403.094	510.318	519.109	572.692	528.361	0.71695	1.81903	2.49528	2.83556	2.8602	3.00193	2.88569	6	3
Stat2	8.46006	5.57149	5.46418	24.5858	106.049	141.902	149.519	121.773	-0.602605	-0.630663	1.53909	3.64792	4.06808	4.14352	3.84738	6	3
Dhx58	5.85489	6.15191	5.00565	9.25768	49.7822	82.0471	133.398	99.6343	0.0713923	-0.226085	0.661009	3.08792	3.80874	4.50995	4.08893	6	3
Il1rn	320.693	439.493	854.648	1236.47	1516.54	1645.37	1779.67	1580.29	0.454647	1.41414	1.94696	2.24152	2.35915	2.47234	2.30092	6	3
Tap1	15.8207	26.9985	18.5285	26.8906	121.597	177.317	222.027	156.38	0.771066	0.227933	0.765289	2.94222	3.48645	3.81085	3.30517	6	3
Upp1	18.7239	60.8852	97.053	133.789	171.805	176.452	220.742	161.425	1.70121	2.37389	2.83701	3.19782	3.23632	3.55941	3.10791	6	3
Ifi35	14.5965	9.82776	11.1303	28.1248	106.33	141.2	219.759	126.439	-0.570688	-0.39113	0.94622	2.86485	3.27405	3.91223	3.11475	6	3
Ube2l6	11.8291	9.95439	13.9326	18.9867	53.9838	86.7198	193.641	174.185	-0.248935	0.236124	0.682649	2.19019	2.87402	4.03297	3.88021	6	3
Psme2	93.8125	84.0887	98.433	162.398	303.263	399.756	724.372	628.739	-0.157868	0.0693619	0.791682	1.69272	2.09127	2.94888	2.74461	6	3
Ddx58	3.75192	3.19494	2.50526	5.87192	47.2933	81.9778	88.6007	75.8088	-0.23184	-0.582669	0.646203	3.65593	4.44953	4.56162	4.33666	6	3
Parp12	8.49642	4.76243	4.17861	9.32286	72.4365	118.111	142.015	108.705	-0.835157	-1.02383	0.133918	3.09179	3.79714	4.06304	3.67742	6	3
Xaf1	2.01426	2.07008	1.55214	6.2519	33.9501	46.1844	65.0702	50.12	0.0394366	-0.375991	1.63404	4.07509	4.51908	5.01368	4.63706	6	3
Il27	1.17449	2.6188	4.37422	19.3364	39.9835	43.3382	45.1093	18.7884	1.15687	1.89699	4.04121	5.0893	5.20553	5.26332	3.99974	6	3
Psmb9	33.5279	44.8643	42.6767	45.5258	109.589	156.158	311.724	249.459	0.420206	0.348086	0.441322	1.70867	2.21957	3.21684	2.89537	6	3
Mxd1	10.0532	62.276	47.9412	27.6387	45.9371	90.2076	126.891	73.5264	2.63102	2.25361	1.45903	2.192	3.16559	3.65786	2.87061	6	3
Pnp2	26.8995	20.9882	46.3666	83.7179	151.037	191.896	232.25	204.134	-0.358001	0.785507	1.63796	2.48925	2.83467	3.11003	2.92387	6	3
Nt5c3	6.58496	9.05789	12.0621	12.5957	51.2948	85.8533	101.411	56.4182	0.46	0.873235	0.935685	2.96157	3.70463	3.9449	3.09891	6	3
Hmox1	994.758	1132.14	1259.02	1656.44	1860.03	1714.5	3646.12	3264.63	0.186635	0.339884	0.735668	0.902908	0.78537	1.87394	1.7145	6	3
Psmb10	29.0065	25.5693	25.3275	33.6382	60.3065	102.152	255.529	194.087	-0.181964	-0.195672	0.213724	1.05594	1.81627	3.13904	2.74226	6	3
Trafd1	25.6607	33.6661	30.6662	28.0813	111.595	159.152	215.139	156.04	0.391736	0.257089	0.130049	2.12064	2.63277	3.06764	2.60428	6	3
Sp110	14.393	18.2437	22.5358	29.6517	58.7139	89.867	147.238	113.181	0.342031	0.646851	1.04275	2.02833	2.64242	3.35471	2.97519	6	3
Slpi	401.204	395.619	640.793	767.946	1006	928.898	1585.95	1495.31	-0.0202243	0.675522	0.936669	1.32622	1.21118	1.98294	1.89804	6	3
Ifi202b	3.44105	2.71468	6.80222	10.3389	31.3866	46.424	59.9753	47.6946	-0.342067	0.983157	1.58716	3.18923	3.75395	4.12345	3.79291	6	3
Il15ra	3.56287	4.136	3.92179	7.03889	24.2045	45.7691	65.0607	40.8219	0.215196	0.138472	0.982308	2.76416	3.68326	4.19067	3.51823	6	3
Cd274	121.171	231.359	169.696	213.892	382.434	559.925	575.338	486.646	0.933089	0.485908	0.819838	1.65817	2.20819	2.24737	2.00583	6	3
Hck	29.9916	18.2872	23.9805	69.3304	138.463	176.54	208.317	168.307	-0.713724	-0.322697	1.20893	2.20687	2.55736	2.79615	2.48846	6	3
Psmb8	95.1367	106.134	100.678	111.362	191.839	262.142	497.204	433.033	0.157813	0.0816746	0.227183	1.01182	1.46227	2.38576	2.1864	6	3
Acpp	185.849	153.026	155.666	383.674	609.182	779.135	793.727	718.846	-0.280354	-0.255677	1.04575	1.71274	2.06774	2.09451	1.95155	6	3
Tnfrsf1b	134.665	133.028	313.226	417.159	409.422	424.294	599.808	563.105	-0.017645	1.21783	1.63122	1.60421	1.65569	2.15513	2.06403	6	3
Znfx1	12.4507	7.78299	7.26118	22.1734	78.248	108.969	112.058	87.6127	-0.67783	-0.777951	0.832603	2.65183	3.12962	3.16995	2.81491	6	3
Cdkn1a	166.929	585.388	679.553	424.823	403.599	478.032	686.348	457.647	1.81016	2.02535	1.34763	1.27369	1.51787	2.03971	1.455	6	3
H2-T23	89.9806	160.554	171.424	166.925	206.862	249.959	438.015	436.18	0.835373	0.929883	0.891514	1.20098	1.47401	2.28329	2.27724	6	3
Mov10	2.9109	3.41925	2.86647	4.23472	18.6267	30.1934	52.8136	39.51	0.232215	-0.0221901	0.540801	2.67783	3.3747	4.18137	3.76268	6	3
Cebpb	271.298	464.884	512.564	638.765	557.578	546.624	959.187	652.805	0.776992	0.917854	1.23541	1.0393	1.01067	1.82193	1.26677	6	3
Parp10	20.455	15.3815	11.4597	9.81578	43.6806	76.5254	149.545	118.987	-0.411257	-0.835884	-1.05928	1.09454	1.90349	2.87005	2.54028	6	3
Fth1	27673.2	27930.7	30890.4	36197.4	40986.5	40601.8	58882.8	51807	0.0133623	0.158669	0.387397	0.566659	0.553054	1.08936	0.904658	6	3
Ogfr	20.0079	19.4106	20.3047	38.5673	89.2959	102.938	135.198	72.8589	-0.043725	0.021244	0.946808	2.15802	2.36313	2.75643	1.86454	6	3
H3f3b	260.15	623.238	746.621	527.875	679.116	777.211	876.776	676.734	1.26044	1.52103	1.02085	1.38431	1.57896	1.75286	1.37925	6	3
Tap2	30.2638	44.8087	39.7948	41.1735	68.8791	99.654	180.686	115.996	0.566186	0.394987	0.444123	1.18647	1.71933	2.57782	1.93841	6	3
Pttg1	26.4233	22.4303	24.3952	30.69	63.2074	78.712	167.409	104.596	-0.236362	-0.115213	0.215958	1.25828	1.57477	2.66349	1.98495	6	3
Nmi	5.33469	2.50188	2.03083	3.1849	17.9893	33.2787	64.1296	41.6509	-1.09239	-1.39333	-0.744156	1.75366	2.64112	3.58751	2.96487	6	3
Fabp3	0.196647	0.398891	2.69456	4.94776	7.61747	9.5234	12.3627	11.0707	1.02039	3.77637	4.6531	5.27563	5.5978	5.97424	5.81499	6	3
Rgs2	36.1343	71.7607	23.3755	7.76451	3.75374	4.63752	2.93361	2.98674	0.989825	-0.628372	-2.2184	-3.26697	-2.96194	-3.62262	-3.59673	6	3
Gch1	14.621	21.6821	49.0181	70.3973	77.656	74.4275	89.9833	68.9576	0.568463	1.74527	2.26748	2.40906	2.34779	2.62162	2.23767	6	3
Mlkl	3.47749	2.0065	1.99422	2.2053	9.93488	21.7093	48.4781	42.1358	-0.793365	-0.802222	-0.657071	1.51446	2.64219	3.80121	3.59893	6	3
Casp1	23.6769	17.474	17.1632	23.7833	59.0949	89.9485	138.008	109.377	-0.43827	-0.464162	0.0064687	1.31955	1.92562	2.5432	2.20776	6	3
Sp140	19.4498	40.9122	48.9862	57.1325	80.3469	101.258	103.927	68.7507	1.07278	1.33262	1.55456	2.04649	2.38021	2.41774	1.82162	6	3
Mmp14	141.647	82.0975	121.91	205.023	280.141	337.255	498.895	403.856	-0.78689	-0.216484	0.533486	0.983853	1.25154	1.81644	1.51154	6	3
Prdx5	1530	1233.26	1531.3	2109.18	2347.21	2389.43	3763.94	3371.91	-0.311055	0.0012253	0.463151	0.617415	0.643135	1.29871	1.14003	6	3
Rasa4	17.6625	28.1903	26.4427	35.7285	63.7959	79.2921	100.972	78.4031	0.674509	0.58218	1.01639	1.85277	2.16649	2.51519	2.15022	6	3
Chmp4b	117.246	104.499	121.374	165.149	240.025	277.422	412.261	303.427	-0.16605	0.0499207	0.49423	1.03365	1.24254	1.81402	1.37181	6	3
Psma6	97.608	78.6691	95.9385	190.598	284.17	326.452	337.876	265.51	-0.311202	-0.0248895	0.965462	1.54168	1.7418	1.79142	1.44369	6	3
Dck	8.62744	11.605	11.0069	8.26071	26.3976	46.4675	60.3239	54.291	0.427742	0.351404	-0.0626668	1.6134	2.42922	2.80573	2.65371	6	3
Slc3a2	195.1	174.793	223.471	341.746	446.606	432.272	570.686	457.607	-0.158566	0.195874	0.808711	1.19479	1.14773	1.54848	1.2299	6	3
Ivns1abp	48.9254	73.7019	65.3127	39.3051	23.481	15.4691	8.56279	14.1637	0.591118	0.41678	-0.315867	-1.05909	-1.66119	-2.51443	-1.78839	6	3
Psmb6	115.412	116.092	171.846	275.521	309.983	297.31	361.717	248.701	0.00847532	0.574323	1.25537	1.4254	1.36517	1.64807	1.10762	6	3
Fcer1g	912.812	1152.52	1180.47	1491.96	1538.6	1540.95	2136.4	1964.16	0.336402	0.370972	0.708819	0.753229	0.75543	1.22679	1.10552	6	3
Batf2	2.03006	1.1516	0.815114	2.56505	16.8082	22.9385	26.9931	13.8026	-0.817883	-1.31645	0.337465	3.04957	3.49818	3.733	2.76535	6	3
H2-K1	546.599	675.989	769.648	792.909	856.111	889.173	1350.73	1332.27	0.306517	0.493716	0.536672	0.647315	0.701981	1.30518	1.28533	6	3
Rcbtb2	63.4124	81.6548	63.6022	42.6292	20.1993	13.6878	11.8408	15.3381	0.364773	0.00431169	-0.572923	-1.65046	-2.21187	-2.421	-2.04765	6	3
Tpst1	5.91293	3.92284	3.86235	2.58004	14.8774	34.6813	49.6347	26.6544	-0.591975	-0.614394	-1.19648	1.33118	2.55221	3.0694	2.17243	6	3
Sap30	28.7645	62.4071	62.3699	59.5795	107.631	115.287	117.363	62.2681	1.11742	1.11656	1.05053	1.90373	2.00287	2.02862	1.1142	6	3
Tle3	23.1861	36.5606	38.6045	69.0873	81.5027	86.5193	98.3005	62.0343	0.65703	0.735509	1.57516	1.81359	1.89976	2.08394	1.41981	6	3
Procr	384.733	250.762	333.379	525.428	601.836	609.893	965.983	914.215	-0.617539	-0.206694	0.449636	0.645513	0.664699	1.32814	1.24868	6	3
Rnf114	21.5316	37.0981	30.9075	41.1527	77.3687	83.1549	90.2908	82.4663	0.78489	0.521501	0.934532	1.84529	1.94935	2.06812	1.93735	6	3
Il21r	51.2123	51.353	41.7917	17.1219	58.3851	116.074	191.803	99.4148	0.00395821	-0.293274	-1.58065	0.18911	1.18048	1.90506	0.95697	6	3
Pml	8.03576	7.04305	3.45326	3.28861	28.2454	45.2622	50.0532	37.6612	-0.190234	-1.21848	-1.28896	1.81351	2.4938	2.63896	2.22857	6	3
Dtx2	5.78789	3.92405	5.20729	18.8279	37.1909	36.4757	37.4795	25.213	-0.560694	-0.152505	1.70176	2.68384	2.65583	2.69499	2.12306	6	3
Mitd1	5.6971	3.32787	2.50566	4.56971	25.1385	34.3205	40.5658	29.1124	-0.775629	-1.18504	-0.318125	2.1416	2.59077	2.83196	2.35333	6	3
Ebi3	16.6947	27.877	37.2314	51.8987	64.0599	61.9047	71.4466	58.6154	0.739685	1.15713	1.63631	1.94003	1.89066	2.09748	1.81189	6	3
Il15	8.37348	16.2875	11.1821	5.58711	22.1798	37.0896	51.1849	23.4843	0.959866	0.417292	-0.583725	1.40535	2.14712	2.61182	1.4878	6	3
Atp6v0d2	59.1431	71.2519	55.1317	47.9948	26.7239	18.6858	12.7846	15.0339	0.268719	-0.101328	-0.301332	-1.14608	-1.66227	-2.2098	-1.97599	6	3
Cd47	51.4436	67.8236	57.0385	49.391	81.8494	112.917	174.982	170.093	0.398796	0.148944	-0.0587434	0.66998	1.1342	1.76614	1.72526	6	3
Nfkbie	20.8232	25.9342	50.914	74.6589	69.1197	61.4034	81.3918	75.8158	0.316664	1.28987	1.84212	1.73091	1.56013	1.96669	1.86431	6	3
Psma5	68.3254	59.9645	60.5873	72.0935	90.4318	124.449	222.122	165.011	-0.188313	-0.173407	0.0774472	0.404408	0.865061	1.70086	1.27207	6	3
Aldh1b1	4.11722	4.0203	2.39252	1.41109	8.21985	19.8247	36.6494	22.1232	-0.0343674	-0.78314	-1.54486	0.997442	2.26756	3.15405	2.42582	6	3
1810035L17Rik	71.096	63.5011	76.6438	97.2826	112.476	135.878	222.86	174.494	-0.162987	0.108401	0.452413	0.661777	0.934472	1.6483	1.29534	6	3
Blnk	6.50117	3.50144	4.38659	13.3039	27.4146	32.4983	39.9415	32.7146	-0.892751	-0.5676	1.03308	2.07617	2.32159	2.61912	2.33116	6	3
Maf	2.95936	1.05998	1.05031	1.86898	13.0385	26.177	27.3284	17.391	-1.48125	-1.49447	-0.663034	2.13942	3.14494	3.20704	2.55498	6	3
Pilrb1	11.6886	11.8518	22.3505	43.4241	47.2405	46.5987	52.4467	51.5846	0.020004	0.935205	1.89339	2.01492	1.99519	2.16575	2.14184	6	3
Atf3	166.536	258.069	171.362	109.436	325.343	400.961	431.887	326.622	0.631923	0.0412131	-0.605747	0.966127	1.26763	1.37482	0.971788	6	3
Usp25	18.039	15.944	14.727	19.6421	49.2061	75.4864	76.0607	56.0752	-0.178106	-0.292656	0.12283	1.44772	2.0651	2.07603	1.63624	6	3
Rnf34	11.0616	8.25455	9.92215	12.7587	40.871	49.8314	53.8499	43.2225	-0.422299	-0.156835	0.205921	1.88552	2.1715	2.28338	1.96622	6	3
Casp7	10.5716	15.3965	14.0615	20.2662	31.4174	42.4346	50.373	45.9244	0.542409	0.411557	0.938882	1.57137	2.00505	2.25246	2.11907	6	3
Rhoc	87.1242	119.245	133.988	177.12	177.42	186.145	235.38	201.513	0.452783	0.620958	1.02358	1.02602	1.09528	1.43385	1.20973	6	3
Stxbp3a	20.2898	35.8623	32.0988	29.3215	51.1894	68.4886	74.4819	67.9461	0.821713	0.661765	0.531204	1.33509	1.75511	1.87614	1.74364	6	3
Gpx1	552.406	474.838	518.816	467.644	330.691	270.73	238.398	251.477	-0.218294	-0.090506	-0.240318	-0.740245	-1.02887	-1.21236	-1.1353	6	3
Samhd1	87.5296	114.828	112.836	99.0234	98.7054	149.82	241.028	216.727	0.391632	0.366385	0.177999	0.173358	0.775387	1.46136	1.30804	6	3
Ifngr1	88.6393	124.813	124.618	78.6759	39.5918	31.1026	27.2718	35.5062	0.49375	0.491494	-0.172025	-1.16274	-1.51091	-1.70054	-1.31988	6	3
Cd300ld	55.983	28.9026	26.3485	21.0758	17.7053	17.281	11.6871	13.1069	-0.95379	-1.08727	-1.4094	-1.66081	-1.6958	-2.26007	-2.09466	6	3
Itga5	30.0007	23.5511	74.0861	71.6956	63.8899	71.8591	98.5961	90.7815	-0.349202	1.30421	1.25689	1.09059	1.26017	1.71653	1.5974	6	3
Map2k1	64.6326	49.7862	47.6206	58.4588	113.659	156.13	186.956	170.791	-0.376516	-0.440676	-0.144842	0.814378	1.27241	1.53236	1.4019	6	3
Clec4a1	21.9775	14.6897	16.5615	25.8442	43.6818	53.2499	82.1969	81.9619	-0.581222	-0.408194	0.233813	0.991005	1.27675	1.90306	1.89893	6	3
Txn1	500.573	344.414	417.325	495.369	604.777	655.768	1069.05	1021.73	-0.539437	-0.262409	-0.0150769	0.272823	0.389605	1.09468	1.02936	6	3
Rassf3	47.0114	76.5232	68.1839	24.0326	13.8181	12.2729	11.7282	16.8248	0.702887	0.53642	-0.968018	-1.76645	-1.93753	-2.00303	-1.48242	6	3
Psmb4	128.828	100.516	130.274	166.619	201.153	214.353	320.129	222.272	-0.358021	0.016103	0.371107	0.642847	0.734542	1.31321	0.78688	6	3
Tdrd7	12.3912	8.95805	7.93799	10.098	32.0366	46.31	52.633	41.4645	-0.468059	-0.64247	-0.295246	1.37041	1.90201	2.08665	1.74256	6	3
Hcls1	157.057	95.8285	103.745	129.266	154	186.817	379.161	367.207	-0.712762	-0.598246	-0.280945	-0.0283579	0.250337	1.27152	1.22531	6	3
Rnf31	10.557	12.422	9.98813	18.7011	37.205	40.0181	42.6153	32.3207	0.234698	-0.0799134	0.824923	1.8173	1.92245	2.01317	1.61426	6	3
Hmox2	48.8045	62.2019	50.8845	33.3304	53.9919	75.0854	140.141	109.493	0.349944	0.0602121	-0.550176	0.145729	0.621518	1.52179	1.16575	6	3
Gpsm2	6.49397	5.36332	3.60682	2.42037	13.3054	28.199	34.7858	21.707	-0.275974	-0.848373	-1.42387	1.03484	2.11847	2.42133	1.74099	6	3
Pde3b	12.3649	20.3109	18.3384	8.58975	2.75016	1.67426	1.55009	3.11301	0.716004	0.568617	-0.525563	-2.16866	-2.88466	-2.99583	-1.98987	6	3
Scarf1	12.6224	13.6796	13.3174	15.0777	20.7155	27.9367	50.2627	43.8139	0.11604	0.0773262	0.25643	0.714724	1.14618	1.9935	1.7954	6	3
Gm5483	117.316	126.541	160.535	178.322	210.9	196.331	273.407	228.508	0.109205	0.452488	0.604085	0.846159	0.742888	1.22065	0.961845	6	3
Fads1	23.1639	18.9719	12.7554	9.10693	4.56652	3.60524	3.52513	6.71466	-0.288014	-0.86077	-1.34684	-2.34271	-2.68371	-2.71613	-1.78649	6	3
Tmbim6	240.068	189.737	231.762	286.971	348.197	375.461	512.735	417.24	-0.339442	-0.0507991	0.257462	0.536461	0.64522	1.09477	0.797434	6	3
Tcirg1	181.889	159.529	195.872	268.397	312.748	317.067	396.599	304.941	-0.18924	0.106853	0.56131	0.781942	0.801729	1.12462	0.745472	6	3
Rilpl2	47.779	67.1189	67.6409	117.909	115.211	93.1001	125.014	99.8617	0.490342	0.501519	1.30323	1.26983	0.962406	1.38764	1.06355	6	3
Fam107b	22.0247	25.6468	37.8497	36.2629	20.5418	11.7564	5.26744	7.08963	0.219656	0.781159	0.719372	-0.10056	-0.905676	-2.06395	-1.63534	6	3
Tgfbr1	26.9057	14.3332	16.0782	14.8231	9.632	7.44086	4.9737	10.3568	-0.908551	-0.742806	-0.860065	-1.482	-1.85437	-2.43552	-1.37733	6	3
Stat3	30.0108	50.9235	58.377	49.8093	63.296	83.7902	85.0479	61.0686	0.76285	0.959918	0.730933	1.07663	1.4813	1.50279	1.02495	6	3
Hmga1	287.175	415.619	396.043	377.073	358.169	358.128	578.48	501.182	0.533331	0.463727	0.392914	0.31871	0.318545	1.01034	0.803404	6	3
Ninj1	207.695	189	210.184	177.151	208.164	247.965	442.622	397.055	-0.13608	0.0171864	-0.229487	0.0032541	0.25567	1.09161	0.934872	6	3
Cct3	65.7493	31.2098	41.9671	85.1996	122.375	140.942	163.983	140.035	-1.07498	-0.647717	0.373871	0.896261	1.10005	1.3185	1.09074	6	3
Psma4	82.3907	51.5162	57.8405	78.8766	108.469	130.95	201.155	151.724	-0.677455	-0.510401	-0.0628841	0.396729	0.668463	1.28775	0.880896	6	3
Pcgf5	13.6818	34.8202	38.6295	22.4093	29.9105	42.7192	45.4689	31.4863	1.34767	1.49744	0.71184	1.12839	1.64263	1.73262	1.20247	6	3
Mrpl27	34.6088	45.002	49.7325	47.0387	57.7397	62.8938	96.4986	76.0169	0.37885	0.52305	0.442709	0.738425	0.861779	1.47937	1.13518	6	3
Nlgn2	2.58174	5.43164	5.23615	5.33079	8.96737	11.7646	17.0345	16.6891	1.07304	1.02016	1.04601	1.79634	2.18804	2.72204	2.69249	6	3
Adap2	10.3888	7.20902	3.61701	3.27592	13.7508	27.5229	44.4742	30.5116	-0.527154	-1.52216	-1.66506	0.404487	1.4056	2.09794	1.55433	6	3
Micall2	4.61449	3.46059	1.61832	12.1195	19.5501	19.1047	23.2299	19.9992	-0.415153	-1.51167	1.39309	2.08293	2.04968	2.33174	2.1157	6	3
Igsf8	38.5541	41.664	52.5339	77.9109	85.5834	82.6274	101.494	76.6001	0.111917	0.446364	1.01494	1.15045	1.09974	1.39644	0.990462	6	3
Ccdc23	16.5401	11.7289	11.5755	13.9669	29.9271	32.6638	57.4548	41.6319	-0.4959	-0.514893	-0.243956	0.855485	0.981725	1.79646	1.33172	6	3
Zyx	93.3176	93.0471	106.123	112.601	108.321	138.036	216.779	168.784	-0.00418802	0.185516	0.270999	0.215092	0.564823	1.216	0.854957	6	3
Gtf2f1	27.6383	24.752	37.0731	54.8485	59.4413	62.3876	77.7072	48.9948	-0.159124	0.423704	0.988783	1.1048	1.17459	1.49138	0.82596	6	3
Cacybp	30.1403	19.1366	17.2698	25.3544	46.0353	59.8168	87.253	67.3421	-0.655359	-0.803442	-0.249458	0.611047	0.988857	1.53351	1.15981	6	3
Hdac1	35.7939	21.469	25.4347	30.9271	50.3129	66.5759	99.47	78.2558	-0.737459	-0.492916	-0.210842	0.491215	0.895286	1.47455	1.12848	6	3
Pygl	87.6597	103.458	84.9941	58.7225	36.5619	34.1117	33.1814	47.8172	0.23906	-0.044551	-0.578	-1.26157	-1.36165	-1.40154	-0.874384	6	3
Cndp2	125.839	89.8949	110.672	146.862	176.151	194.95	271.228	259.649	-0.485268	-0.185289	0.222882	0.485234	0.631525	1.10793	1.04498	6	3
Katna1	14.3182	21.6237	34.3494	25.2561	33.3195	41.929	45.1922	26.5264	0.594763	1.26243	0.818782	1.21852	1.5501	1.65822	0.889579	6	3
Pomp	133.894	90.7429	96.2585	125.733	147.747	171.29	288.444	229.988	-0.561235	-0.476105	-0.090728	0.142038	0.35535	1.1072	0.780467	6	3
Dusp3	35.5119	23.1286	20.1537	19.6097	14.8531	11.7611	9.31402	12.3798	-0.618625	-0.817258	-0.856735	-1.25754	-1.59428	-1.93083	-1.52031	6	3
Cdk18	40.6285	26.7313	24.3457	23.3893	18.5636	13.4838	11.443	13.2949	-0.603962	-0.738825	-0.796643	-1.13002	-1.59126	-1.82803	-1.61162	6	3
Psma2	109.159	92.1291	98.946	138.173	165.156	174.349	236.967	186.156	-0.244702	-0.141718	0.340045	0.597398	0.675547	1.11826	0.770081	6	3
Psma3	74.4105	59.5183	67.2152	88.5457	118.49	133.534	170.356	140.028	-0.322173	-0.146719	0.250916	0.671187	0.843629	1.19497	0.912137	6	3
Cgnl1	28.3809	28.8188	27.9557	19.5998	10.9505	9.34186	7.66576	11.9554	0.0220899	-0.0217779	-0.534081	-1.37392	-1.60314	-1.88842	-1.24726	6	3
Aftph	15.8209	20.7681	18.4998	17.4464	30.5716	43.112	48.2474	35.6569	0.392538	0.225678	0.141098	0.95036	1.44626	1.60862	1.17235	6	3
Pmepa1	2.30273	1.40515	1.8065	3.63805	7.38453	12.2744	15.7527	10.8641	-0.712621	-0.350148	0.65982	1.68116	2.41424	2.77418	2.23815	6	3
Rrbp1	59.7081	54.3276	60.4897	62.1407	83.6636	105.403	138.393	104.391	-0.136241	0.0187628	0.0576118	0.486673	0.819917	1.21277	0.805999	6	3
Parp11	2.93272	1.25248	1.3511	1.81909	5.64172	10.5501	19.7075	12.7072	-1.22745	-1.1181	-0.689022	0.943896	1.84695	2.74843	2.11533	6	3
Chmp2a	93.7911	103.6	118.462	154.247	155.245	149.519	197.742	162.048	0.143501	0.336901	0.717719	0.727024	0.672806	1.0761	0.788898	6	3
Acaa1a	44.5507	47.7769	48.307	50.6672	55.8772	63.704	107.947	101.261	0.100865	0.116784	0.185604	0.326812	0.515936	1.2768	1.18456	6	3
Mvp	58.627	49.1677	50.5218	64.2804	79.1319	90.285	136.147	103.232	-0.253854	-0.214659	0.132814	0.432694	0.622921	1.21553	0.816253	6	3
Tifa	23.6504	32.2933	32.0792	15.2795	36.6017	55.9428	64.4487	53.5526	0.44937	0.439774	-0.630267	0.630046	1.24209	1.44629	1.17909	6	3
Slc39a1	63.8592	48.3068	74.5687	107.353	124.771	124.009	141.766	110.607	-0.402668	0.223676	0.749396	0.966316	0.957478	1.15055	0.792476	6	3
Fam96b	41.2663	39.1846	50.6314	76.8413	79.9342	73.8543	97.6508	74.5685	-0.0746773	0.295068	0.896918	0.953849	0.839718	1.24267	0.853602	6	3
Dbnl	34.104	24.6695	22.7554	23.3378	37.6602	57.2744	86.6643	67.5295	-0.467212	-0.583732	-0.547272	0.1431	0.747949	1.3455	0.985577	6	3
Ccdc88b	25.6407	19.2901	38.4141	60.8194	57.705	53.6917	63.9697	58.4523	-0.410575	0.5832	1.2461	1.17026	1.06626	1.31895	1.18882	6	3
Scand1	19.3556	26.383	31.92	31.5336	31.9264	30.9007	52.6732	44.9425	0.446858	0.72171	0.704139	0.721999	0.674888	1.44432	1.21533	6	3
Ehd4	21.586	18.7001	16.0815	11.9241	31.9053	51.8317	59.8509	38.8695	-0.20705	-0.424694	-0.856216	0.5637	1.26374	1.47128	0.848543	6	3
Gtf2i	14.3007	13.8093	11.9232	7.50697	3.43698	3.05758	2.52429	4.07259	-0.0504456	-0.262314	-0.929783	-2.05687	-2.22562	-2.50214	-1.81207	6	3
H2afy	62.4506	48.4882	49.3162	62.3816	80.7347	99.255	138.55	113.271	-0.365082	-0.340654	-0.00159488	0.370473	0.668424	1.14962	0.858991	6	3
Adss	31.721	31.5061	30.2674	25.9771	19.9337	15.5284	10.2159	11.3143	-0.00980707	-0.0676735	-0.288198	-0.670229	-1.03053	-1.63462	-1.48729	6	3
Psmb7	69.7771	51.9204	64.4501	100.015	118.791	128.141	148.807	118.309	-0.426452	-0.114571	0.519391	0.7676	0.876907	1.09262	0.761734	6	3
Fmnl1	56.6013	55.3265	45.4968	51.7543	51.6314	36.5327	22.5442	30.2626	-0.0328645	-0.31507	-0.129156	-0.132586	-0.631647	-1.32808	-0.903299	6	3
Sort1	32.4297	43.1816	32.5451	24.4409	18.3275	15.2396	10.922	15.3098	0.413101	0.00512467	-0.408018	-0.823306	-1.08949	-1.57008	-1.08286	6	3
Ppa1	9.6112	4.29466	5.59407	9.9768	18.2648	22.727	33.1339	24.5017	-1.16217	-0.780818	0.0538606	0.926277	1.24162	1.78552	1.35009	6	3
Cnp	4.59135	3.50344	2.7411	2.93749	5.49808	9.9982	21.77	21.3808	-0.390146	-0.744163	-0.644334	0.260009	1.12275	2.24535	2.21933	6	3
Psmd11	38.1181	35.8107	35.617	47.2363	66.881	72.7506	88.5933	77.8291	-0.0900855	-0.0979102	0.30942	0.81112	0.932483	1.21672	1.02983	6	3
Sin3b	77.5402	57.7048	76.3379	118.088	133.774	129.409	160.117	129.669	-0.426253	-0.022545	0.606846	0.786781	0.738922	1.04611	0.741817	6	3
Rnf135	4.48685	1.8394	1.84558	2.85065	10.9504	15.7695	20.2389	16.0343	-1.28647	-1.28163	-0.654412	1.28721	1.81336	2.17336	1.83739	6	3
Ppap2b	7.10615	2.61815	5.13942	20.737	18.2806	18.4025	24.6327	20.8224	-1.44052	-0.467463	1.54507	1.36317	1.37276	1.79343	1.551	6	3
C130026I21Rik	3.37392	5.50713	6.34782	7.24115	9.52805	11.7132	15.2744	13.8953	0.706875	0.911835	1.10179	1.49776	1.79564	2.17862	2.0421	6	3
Sla2	17.6785	11.3863	13.5815	16.2885	23.9261	29.523	49.9426	35.791	-0.634697	-0.380353	-0.118142	0.436589	0.739843	1.49828	1.0176	6	3
Nedd9	15.8451	17.9326	22.5265	22.5209	13.6982	8.50058	4.48255	5.41744	0.178548	0.507586	0.507228	-0.21005	-0.898404	-1.82165	-1.54835	6	3
Psmd10	18.7014	20.0267	23.5755	30.2003	38.5222	38.3479	48.3098	43.7116	0.0987784	0.334142	0.691417	1.04254	1.036	1.36917	1.22487	6	3
Cdh1	12.9368	10.0874	7.46278	5.89915	3.09439	2.33392	2.03898	2.77497	-0.358926	-0.793696	-1.1329	-2.06375	-2.47065	-2.66556	-2.22094	6	3
Hk3	46.9	30.7007	28.2666	32.2202	30.9298	45.6332	106.524	98.6252	-0.611316	-0.73049	-0.541622	-0.60059	-0.0395041	1.18352	1.07237	6	3
Pgs1	17.7177	13.3798	15.7655	25.3963	30.2694	36.1238	46.9622	38.537	-0.405135	-0.16842	0.519427	0.772669	1.02776	1.40631	1.12105	6	3
Max	29.9211	31.9679	24.8485	28.6694	48.5581	59.8771	71.1534	39.34	0.0954608	-0.268004	-0.0616515	0.698549	1.00084	1.24977	0.394834	6	3
Jup	8.4917	15.4071	16.6694	15.5081	8.89225	4.71614	2.00111	2.38797	0.85947	0.973077	0.868897	0.0664951	-0.848447	-2.08525	-1.83027	6	3
Lap3	10.0606	7.84021	7.77956	10.4757	21.1407	28.3568	30.4918	21.6781	-0.359752	-0.370956	0.0583303	1.07131	1.49498	1.5997	1.10752	6	3
Nod1	2.19201	2.7419	2.84969	3.26628	4.47668	9.13417	12.7785	10.2673	0.322922	0.378551	0.575394	1.03017	2.05902	2.54339	2.22773	6	3
Slc1a5	23.7311	14.3025	17.9101	15.214	11.6624	8.76793	7.0413	7.70141	-0.730512	-0.406006	-0.641379	-1.02491	-1.43647	-1.75287	-1.62358	6	3
Ptprs	17.8198	27.7599	24.4937	20.2135	14.1965	11.6382	5.7602	6.16953	0.639521	0.45893	0.181838	-0.327946	-0.614613	-1.62929	-1.53025	6	3
Casp8	23.4209	23.7261	19.4845	13.8668	25.5562	44.2067	57.5745	51.9174	0.0186785	-0.26547	-0.756162	0.125877	0.916469	1.29763	1.14842	6	3
Pdcd4	14.8654	23.7949	18.7147	9.50423	6.03538	5.48753	4.024	5.04383	0.678694	0.332214	-0.645317	-1.30044	-1.43773	-1.88526	-1.55937	6	3
Lyn	43.132	42.0928	41.2156	39.2188	65.928	80.6855	92.7327	67.8674	-0.0351851	-0.0655681	-0.137213	0.612133	0.903551	1.10432	0.65396	6	3
F11r	21.4805	22.6179	23.7832	37.1828	45.7151	47.3175	50.7488	43.363	0.0744374	0.146915	0.791608	1.08964	1.13935	1.24035	1.01344	6	3
Ly9	7.98644	7.47323	6.28578	7.00035	10.5513	13.7911	26.5625	24.3386	-0.0958206	-0.345461	-0.190126	0.401796	0.788113	1.73377	1.60762	6	3
Snrpc	52.0871	39.1975	42.4752	59.1366	66.3783	72.3215	108.92	79.1498	-0.410164	-0.294305	0.183125	0.349786	0.473498	1.06427	0.60366	6	3
Triobp	12.8804	13.4661	12.978	21.3295	33.3971	33.4246	33.6623	29.037	0.0641547	0.0108907	0.727673	1.37455	1.37573	1.38596	1.17272	6	3
Adprh	47.3798	32.4383	39.2396	55.7484	70.2648	75.9812	98.4523	90.1109	-0.546574	-0.271962	0.234658	0.56853	0.68137	1.05515	0.92743	6	3
Otud5	37.4229	37.5659	40.2058	51.1005	66.0727	74.4591	79.1772	67.4302	0.00550231	0.103482	0.449416	0.820133	0.992527	1.08116	0.849474	6	3
Glt25d1	51.9039	45.8186	38.5695	32.3868	25.299	22.2137	21.942	22.0744	-0.17991	-0.428383	-0.680437	-1.03676	-1.22439	-1.24215	-1.23347	6	3
Pgm2	49.564	58.7966	47.8531	28.152	32.0992	61.246	103.1	97.7717	0.24644	-0.0506802	-0.816055	-0.626755	0.305323	1.05668	0.980124	6	3
F13a1	41.3414	39.9103	38.6667	33.9146	24.3258	23.5824	17.2699	27.1293	-0.0508261	-0.0964956	-0.285681	-0.7651	-0.809877	-1.25933	-0.607735	6	3
Stx3	12.9327	12.1334	23.3077	27.2847	25.9369	27.7945	33.54	20.619	-0.0920396	0.849783	1.07707	1.00398	1.10378	1.37486	0.672951	6	3
Gnpda1	27.2725	15.8351	15.1051	15.3076	13.3947	11.3871	9.30012	16.3136	-0.784321	-0.852411	-0.833199	-1.02578	-1.26005	-1.55213	-0.741372	6	3
Pla2g4a	12.2574	9.83848	11.5864	11.5137	17.4892	27.691	32.6974	31.7362	-0.317146	-0.0812206	-0.0903015	0.512811	1.17576	1.41552	1.37248	6	3
Il3ra	21.667	23.388	25.6521	27.1986	29.6202	28.919	50.3488	41.7124	0.110269	0.243578	0.328033	0.451082	0.416518	1.21646	0.944977	6	3
Selenbp2	12.945	25.8226	22.1913	11.8828	6.53574	5.46211	4.00993	4.97806	0.996239	0.777599	-0.12352	-0.985972	-1.24486	-1.69075	-1.37874	6	3
Agtrap	17.693	18.4376	20.0423	24.8105	33.4672	36.5993	41.6328	40.1991	0.0594722	0.179869	0.487772	0.919569	1.04864	1.23454	1.18398	6	3
Hist1h3f	25.279	25.6499	34.3717	34.0093	38.5109	34.2482	55.7267	48.5299	0.0210138	0.443282	0.42799	0.607327	0.438089	1.14043	0.940934	6	3
Ctdsp2	33.7513	34.9872	27.7482	18.3337	17.0304	15.8894	13.4712	17.4674	0.0518841	-0.282549	-0.880445	-0.986831	-1.08688	-1.32506	-0.950278	6	3
Crlf2	38.1721	33.282	45.0894	57.4575	63.0361	59.6443	77.5327	64.7956	-0.197776	0.24027	0.589977	0.72366	0.643866	1.02229	0.763377	6	3
Snx20	37.1581	25.1099	39.2343	59.1503	62.8868	61.0223	76.1473	55.0137	-0.56542	0.0784387	0.670709	0.75908	0.71566	1.03512	0.566114	6	3
Snw1	23.9449	24.0068	20.9543	22.5921	34.7475	43.2747	53.7359	38.8351	0.0037247	-0.192472	-0.0839	0.537191	0.853805	1.16617	0.697643	6	3
Psmc4	43.4166	22.8015	28.9991	49.46	63.5445	70.4195	87.5641	72.3847	-0.929118	-0.582239	0.188015	0.549521	0.697728	1.01209	0.737438	6	3
Ly96	27.9186	13.9478	23.2265	38.9981	50.2129	50.4687	59.779	40.8854	-1.00119	-0.265455	0.482177	0.846831	0.854162	1.09841	0.550359	6	3
Rgs11	16.5909	24.1076	20.4757	11.6716	7.13084	6.92762	5.54814	7.35281	0.539096	0.303521	-0.50739	-1.21825	-1.25996	-1.58032	-1.17402	6	3
Srpr	31.1253	28.2089	30.8059	40.5885	55.6359	62.5219	63.9894	51.7747	-0.141937	-0.0148811	0.382983	0.837928	1.00627	1.03975	0.73416	6	3
Gpcpd1	17.7778	32.9603	23.6633	11.1676	7.10613	7.599	6.44269	12.4687	0.890653	0.412574	-0.670758	-1.32294	-1.2262	-1.46434	-0.511766	6	3
Suds3	25.1474	31.1188	29.5007	29.198	28.4005	32.5306	54.6356	40.6379	0.307377	0.23034	0.21546	0.175507	0.371388	1.11943	0.692417	6	3
Tnfrsf14	6.41696	9.22452	4.99782	3.18336	6.27559	11.6081	21.156	16.2638	0.523584	-0.360591	-1.01134	-0.0321389	0.85517	1.7211	1.3417	6	3
Rmnd5a	15.6193	19.8192	17.6988	12.8905	10.8656	8.71366	5.27904	8.31002	0.343569	0.180322	-0.277022	-0.523562	-0.841979	-1.56498	-0.910406	6	3
Ms4a7	12.0316	3.46556	6.5189	8.35974	13.7238	15.6681	32.7912	28.3296	-1.79567	-0.884128	-0.525299	0.189851	0.381002	1.44648	1.23548	6	3
Psmd14	32.1109	22.0798	24.7598	37.3507	51.5442	57.8621	65.9948	56.0982	-0.540336	-0.375063	0.218072	0.682747	0.849556	1.03929	0.804891	6	3
Keap1	20.6485	11.3268	7.14862	9.31098	26.778	38.9522	47.8928	39.1726	-0.866297	-1.5303	-1.14903	0.375011	0.915668	1.21377	0.923808	6	3
Mxd4	8.7436	12.8295	10.0951	7.04327	4.61218	3.09297	2.01972	2.416	0.553166	0.207356	-0.311982	-0.922779	-1.49923	-2.11407	-1.85561	6	3
Gmppb	11.1257	7.29116	6.81378	14.7209	21.1848	26.2157	28.2775	26.5111	-0.609676	-0.707369	0.40397	0.929133	1.23653	1.34576	1.2527	6	3
Tfg	27.401	31.6351	29.587	31.9355	43.4402	55.6568	56.4649	49.884	0.207298	0.110735	0.220932	0.664802	1.02233	1.04313	0.864349	6	3
Grk5	10.4845	13.469	12.2173	8.34951	3.97362	3.0539	2.77146	4.99997	0.361385	0.220667	-0.328495	-1.39973	-1.77953	-1.91954	-1.06827	6	3
Magohb	10.8283	7.36942	10.2602	16.1977	21.2165	25.0266	27.9209	14.4464	-0.555184	-0.0777479	0.580982	0.97038	1.20866	1.36654	0.415903	6	3
Lonrf3	14.702	25.6866	21.8676	8.74298	6.69599	5.95571	5.05781	7.20183	0.805004	0.572782	-0.749815	-1.13464	-1.30367	-1.53943	-1.02958	6	3
Tcea1	26.7153	29.0641	33.1044	38.9969	46.8314	52.6996	53.8698	53.0442	0.121572	0.309357	0.545693	0.80981	0.980126	1.01181	0.989529	6	3
Rgs14	13.2171	3.79151	2.33807	2.39393	15.7834	24.4737	34.4446	23.6764	-1.80156	-2.49902	-2.46495	0.256002	0.888827	1.38187	0.841044	6	3
Hat1	19.2596	33.365	32.6147	26.288	24.4349	31.4042	40.985	39.2181	0.792758	0.759945	0.448827	0.343365	0.70538	1.08952	1.02594	6	3
Dpysl2	13.1061	19.3285	12.2948	6.42174	9.59786	17.9729	32.4107	26.5414	0.560491	-0.0921902	-1.0292	-0.449454	0.455585	1.30623	1.01801	6	3
Rps6ka4	27.0989	15.2257	25.0054	41.4209	50.1231	53.386	54.5672	49.4389	-0.831726	-0.115995	0.612125	0.887241	0.978227	1.0098	0.867412	6	3
Acsl5	22.4201	13.9631	20.3408	30.4942	40.1764	45.1256	46.6821	44.3212	-0.683173	-0.140416	0.443742	0.841556	1.00915	1.05808	0.983204	6	3
Tbrg1	26.4941	25.4294	24.854	27.7804	34.8633	40.4411	54.2831	48.3064	-0.0591737	-0.0921931	0.0683963	0.396038	0.610151	1.03483	0.866543	6	3
Idh2	15.7451	20.0468	19.6433	17.1735	10.3182	8.50494	5.82214	6.75136	0.348469	0.319134	0.125281	-0.609712	-0.88853	-1.43528	-1.22165	6	3
Prpf38a	10.2213	13.7572	17.9574	17.4017	21.0285	22.8138	24.3877	19.8679	0.428608	0.813	0.76765	1.04077	1.15833	1.25458	0.958861	6	3
Ankrd44	12.7532	15.4551	16.559	15.5102	12.0324	7.97253	4.53049	7.34534	0.277224	0.376756	0.282358	-0.0839349	-0.67775	-1.49312	-0.795958	6	3
Ppp1r11	16.8392	14.6448	20.8725	29.5325	29.6469	30.4336	36.5136	27.6866	-0.201435	0.30978	0.81048	0.816058	0.853841	1.11661	0.717364	6	3
Pxk	8.83449	13.8311	12.4555	6.74741	5.38421	12.6431	23.3689	21.7338	0.646697	0.495564	-0.388813	-0.714412	0.517131	1.40337	1.29872	6	3
Aph1c	7.53332	11.9341	10.7416	6.41468	3.23874	2.39952	1.82882	2.81582	0.663732	0.511851	-0.231909	-1.21785	-1.65054	-2.04237	-1.41973	6	3
Hadh	12.9704	21.1722	17.1569	12.5066	8.92246	6.28954	4.60186	5.50071	0.706948	0.403566	-0.0525333	-0.53971	-1.0442	-1.49493	-1.23753	6	3
Cd93	13.2565	12.8494	9.99712	8.10827	5.51935	5.38665	3.96951	4.13392	-0.0449989	-0.407115	-0.709234	-1.26413	-1.29924	-1.73967	-1.68112	6	3
AI837181	20.6826	20.6388	12.8778	18.2358	32.9031	33.9567	43.8771	34.1682	-0.00305847	-0.683531	-0.181644	0.669806	0.715279	1.08505	0.724237	6	3
Hagh	14.6095	14.3041	11.1748	9.96332	6.2854	7.07487	4.86143	7.79356	-0.0304781	-0.386658	-0.552208	-1.21683	-1.04613	-1.58745	-0.906552	6	3
Il6st	16.8889	20.9582	15.4274	9.90085	8.20946	8.42527	6.20745	7.55925	0.311439	-0.13058	-0.770451	-1.04072	-1.00328	-1.444	-1.15976	6	3
Ascc3	3.39838	3.35156	2.70697	2.97262	5.22183	9.91356	12.4784	11.7262	-0.0200144	-0.328168	-0.193112	0.619708	1.54456	1.87651	1.78682	6	3
Ssbp4	18.8397	20.2509	20.5584	17.5608	11.9281	9.54341	7.62405	9.13079	0.10421	0.125952	-0.101417	-0.659412	-0.981199	-1.30515	-1.04496	6	3
Ankfy1	15.428	13.5497	11.4412	12.907	24.5712	32.2009	33.8534	27.9571	-0.18729	-0.431313	-0.257397	0.671417	1.06155	1.13375	0.857664	6	3
Acaa2	22.1641	16.8035	14.5652	14.3766	9.81357	9.5817	8.82664	11.9325	-0.399463	-0.605699	-0.624502	-1.17537	-1.20987	-1.32829	-0.893328	6	3
Gnb4	5.70965	6.66623	5.81108	5.61769	9.48104	13.3701	16.5517	12.3188	0.223469	0.025404	-0.0234253	0.731643	1.22754	1.53551	1.10939	6	3
Xylt2	13.1994	10.2134	6.86517	8.91756	16.1283	21.4461	30.5833	28.5294	-0.370009	-0.943105	-0.565751	0.289122	0.700243	1.21227	1.11198	6	3
Dhrs7	33.321	37.2515	34.4801	29.9089	21.7193	16.966	16.0952	20.2331	0.160867	0.0493323	-0.155857	-0.617454	-0.973785	-1.0498	-0.719714	6	3
Dync1h1	23.1886	16.7533	12.7722	12.9218	24.9213	36.8295	47.8285	34.4619	-0.46897	-0.860409	-0.843609	0.103964	0.667446	1.04445	0.571587	6	3
Cycs	18.204	13.4947	15.0875	22.1434	28.4361	30.7944	37.9549	32.842	-0.431863	-0.270902	0.282621	0.643468	0.758413	1.06003	0.851286	6	3
Pink1	17.094	14.6864	14.0674	11.7769	8.07464	8.04659	6.41363	7.63997	-0.219009	-0.281134	-0.53753	-1.08202	-1.08704	-1.41428	-1.16185	6	3
Haao	13.7305	26.9615	21.6516	17.6869	9.88499	7.62926	5.60442	6.73787	0.973517	0.657089	0.365297	-0.474073	-0.847769	-1.29275	-1.02702	6	3
Peli2	10.6555	14.0518	11.193	8.75291	6.51246	5.41107	3.66779	5.16493	0.399157	0.0709985	-0.283764	-0.710324	-0.977612	-1.53862	-1.04478	6	3
Rcc2	26.4533	14.6685	14.0232	12.7284	12.0299	11.8814	11.5009	11.6056	-0.850726	-0.915632	-1.0554	-1.13682	-1.15474	-1.2017	-1.18863	6	3
Igf1r	8.87733	12.1095	11.852	9.45197	4.95627	3.98861	2.94711	3.39229	0.447942	0.416933	0.0904892	-0.840871	-1.15424	-1.59082	-1.38787	6	3
Sec23b	13.8845	8.78305	9.5136	13.7519	19.8305	24.6056	29.0602	26.7863	-0.660681	-0.545412	-0.0138443	0.514246	0.825511	1.06557	0.94802	6	3
Prkcb	27.4018	21.3164	19.2053	18.2342	15.2766	17.49	13.1666	14.6953	-0.362307	-0.512766	-0.587624	-0.842947	-0.64774	-1.05739	-0.898916	6	3
Pdzk1ip1	4.33957	6.28966	6.81882	6.98929	9.08327	10.8561	11.8709	8.41566	0.53543	0.65197	0.687594	1.06566	1.32288	1.45181	0.955524	6	3
Plcl2	6.84858	7.02266	6.83526	11.4552	9.80857	10.8242	16.7822	13.1484	0.0362127	-0.00280867	0.742126	0.518238	0.660384	1.29306	0.94101	6	3
Traf2	8.09681	6.90587	9.5608	13.0099	18.0213	17.904	18.1006	16.3194	-0.22953	0.239778	0.684184	1.15428	1.14486	1.16061	1.01116	6	3
Il18	4.79868	5.61331	5.16612	3.74742	4.75704	6.27728	14.0161	11.7722	0.226214	0.106444	-0.35674	-0.0125735	0.387502	1.54638	1.29467	6	3
Taok3	16.396	18.9197	17.3541	6.96108	8.47553	19.9359	33.5189	23.0978	0.206545	0.0819327	-1.23596	-0.951968	0.282025	1.03163	0.494412	6	3
Map3k3	18.3197	16.8772	13.1591	7.95409	8.20157	8.98706	7.93973	11.6343	-0.11832	-0.477335	-1.20363	-1.15942	-1.02747	-1.20623	-0.655011	6	3
Dnmt3l	7.93796	4.13477	4.13961	9.34841	14.6303	13.4265	18.7837	12.743	-0.940961	-0.939273	0.235953	0.882119	0.758243	1.24264	0.682865	6	3
Klhl9	21.4084	22.8687	18.0949	14.6401	13.3934	13.535	10.228	11.8024	0.0951974	-0.242594	-0.548252	-0.676655	-0.661482	-1.06565	-0.859097	6	3
Hist3h2a	8.49743	10.1526	6.26481	3.70101	7.38881	11.5864	20.1729	15.6855	0.256751	-0.439756	-1.19911	-0.201685	0.447334	1.24732	0.884333	6	3
Hist2h2ac	3.48341	4.39648	4.14122	3.71428	8.86648	7.34116	10.2259	10.0029	0.335849	0.249556	0.0925823	1.34786	1.07551	1.55366	1.52185	6	3
Fam82a2	6.78866	6.16711	5.00989	6.1989	10.1206	13.115	16.594	12.31	-0.138532	-0.438348	-0.131115	0.576096	0.950019	1.28946	0.858632	6	3
Mnt	16.3009	22.2343	14.8405	12.7761	10.6373	8.54864	7.47677	10.7758	0.447835	-0.135412	-0.351504	-0.61582	-0.931185	-1.12446	-0.597157	6	3
Esyt2	16.5939	12.3588	11.7796	10.4973	8.94166	8.3635	7.16954	9.7251	-0.425114	-0.494362	-0.660635	-0.892038	-0.988474	-1.2107	-0.770868	6	3
Sertad3	8.99452	8.6171	2.66517	6.007	8.37492	11.3134	20.1307	15.3029	-0.0618439	-1.75482	-0.582402	-0.102971	0.330914	1.16228	0.766687	6	3
Igf1	21.8673	14.0487	14.1208	13.1528	11.6488	11.7649	10.8441	12.7446	-0.638338	-0.630953	-0.733405	-0.908594	-0.894286	-1.01186	-0.778889	6	3
Stxbp1	4.72938	8.26288	8.2642	7.27647	5.82869	7.60695	11.2752	11.0104	0.804994	0.805224	0.621588	0.301521	0.685667	1.25343	1.21914	6	3
Wdr45	11.903	12.643	10.355	7.79017	5.74883	5.92875	5.0298	5.68878	0.0870136	-0.200998	-0.611599	-1.04998	-1.00553	-1.24275	-1.06513	6	3
Snx14	7.89577	12.3369	10.8074	7.57837	3.95271	3.7364	3.15597	5.62816	0.643828	0.452868	-0.0591924	-0.998238	-1.07943	-1.323	-0.488417	6	3
Gna12	15.8774	9.29838	8.34623	9.01733	10.948	9.63149	7.39829	9.31069	-0.771923	-0.927778	-0.816202	-0.536307	-0.721144	-1.10171	-0.770015	6	3
Myo5a	15.9695	15.1171	12.1353	9.50176	8.4417	8.13644	7.6824	9.67397	-0.0791377	-0.396109	-0.749052	-0.919714	-0.97285	-1.05569	-0.723139	6	3
Tlr6	7.21305	10.416	9.46895	5.95775	8.11921	12.303	15.0805	13.7643	0.53012	0.392595	-0.275842	0.17073	0.770329	1.064	0.93225	6	3
Rarg	10.2086	14.3623	11.2895	10.1297	6.5062	5.04202	4.6086	7.05433	0.492502	0.145197	-0.0111936	-0.649898	-1.01771	-1.14738	-0.533204	6	3
Tmed1	5.80857	4.86236	4.81052	5.57228	6.92439	7.76651	13.4836	11.7482	-0.256526	-0.27199	-0.0599153	0.253504	0.419083	1.21495	1.01618	6	3
Cd72	6.8901	6.99467	6.25187	6.15521	7.10052	11.3842	14.4455	13.8083	0.0217311	-0.140237	-0.162717	0.0433998	0.724436	1.06802	1.00294	6	3
Runx2	8.36631	13.2928	12.5739	7.71647	4.47362	4.79106	3.97692	6.54101	0.667982	0.587769	-0.11665	-0.903149	-0.804247	-1.07294	-0.355078	6	3
Saa3	82.4796	272.139	917.716	3043.55	7059.22	8475.12	14526.3	18899.1	1.72223	3.47594	5.20557	6.41933	6.68305	7.46041	7.84006	8	3
Irf7	6.03769	4.7655	4.52233	22.5209	160.259	284.725	572.357	578.989	-0.341369	-0.41693	1.8992	4.73026	5.55943	6.56677	6.5834	8	3
Lcn2	52.5783	125.166	195.578	420.972	793.718	927.396	1444.39	1980.34	1.2513	1.8952	3.00118	3.91609	4.14065	4.77985	5.23514	8	3
Cfb	5.40757	9.88358	13.0709	19.2028	78.4604	149.927	365.986	525.03	0.870053	1.27331	1.82826	3.85891	4.79314	6.08066	6.60128	8	3
Ccl5	499.028	674.587	1169.28	2217.09	3902.12	4523.41	7715.96	7879.36	0.434884	1.22843	2.15147	2.96707	3.18022	3.95065	3.98089	8	3
Gbp2	4.6433	4.53335	8.39992	17.475	87.2098	190.722	331.9	341.006	-0.0345729	0.855225	1.91207	4.23127	5.36018	6.15945	6.1985	8	3
Bst2	53.7158	67.1069	74.0102	90.038	255.823	371.037	984.285	1057.1	0.321115	0.462378	0.745188	2.25173	2.78814	4.19566	4.29862	8	3
Ptges	9.07926	19.1352	51.2799	102.441	152.242	173.096	270.521	323.827	1.07558	2.49775	3.49607	4.06765	4.25285	4.89702	5.1565	8	3
Oas3	3.03184	2.16879	2.13737	2.99342	26.1446	53.5268	112.389	117.693	-0.483303	-0.504357	-0.0183989	3.10825	4.142	5.21216	5.27869	8	3
Ly6a	28.4698	18.8276	20.8426	21.4626	52.1386	92.3991	305.723	440.57	-0.596583	-0.449897	-0.407608	0.872919	1.69845	3.42472	3.95187	8	3
Hp	120.208	183.093	179.643	138.777	277.788	409.688	824.2	1047.49	0.607044	0.5796	0.207236	1.20845	1.76899	2.77746	3.12333	8	3
Fcgr1	3.69864	1.62666	1.40406	0.648019	10.5201	37.0229	118.988	129.385	-1.18508	-1.39739	-2.51289	1.50808	3.32335	5.00768	5.12853	8	3
Lgals3bp	32.705	34.5234	36.7931	43.451	120.065	183.002	370.392	414.782	0.0780633	0.169924	0.409878	1.87623	2.48428	3.50147	3.66477	8	3
Oas1g	2.21549	1.24332	1.15433	3.59205	26.0732	43.8939	82.5129	85.8668	-0.833428	-0.94057	0.697182	3.55687	4.30832	5.21892	5.2764	8	3
Marco	4.39112	6.16024	6.71278	17.4268	42.0377	46.1073	82.5376	121.948	0.488398	0.612321	1.98865	3.25902	3.39233	4.23239	4.79553	8	3
Cd38	14.1917	38.2644	62.2492	80.4356	117.26	128.274	141.678	181.739	1.43096	2.13301	2.50279	3.04659	3.17611	3.3195	3.67875	8	3
H2-M2	26.0367	53.8294	100.333	146.983	167.316	203.22	179.679	252.168	1.04785	1.94618	2.49703	2.68396	2.96442	2.7868	3.27577	8	3
Glrx	63.0863	42.5204	73.0295	95.9679	127.263	171.14	330.046	442.305	-0.569172	0.211153	0.605225	1.01241	1.43978	2.38727	2.80964	8	3
Acsl1	35.1994	23.4555	85.4294	147.034	166.49	171.834	199.875	259.903	-0.585625	1.27918	2.06253	2.24181	2.28739	2.50548	2.88435	8	3
Ctsc	99.4304	135.398	179.805	183.071	294.696	362.806	458.261	556.561	0.445448	0.854674	0.880644	1.56747	1.86744	2.20441	2.48478	8	3
Tapbp	99.3316	101.966	105.737	150.039	253.448	336.529	537.885	551.09	0.0377635	0.0901556	0.595013	1.35137	1.76041	2.43697	2.47196	8	3
Fpr2	83.2849	88.3255	168.325	198.236	270.686	291.044	392.406	459.095	0.0847751	1.01512	1.25109	1.70049	1.80511	2.23622	2.46267	8	3
Plac8	3.83663	8.53507	9.9349	7.31965	15.4098	25.64	60.3648	61.3156	1.15356	1.37267	0.931935	2.00594	2.74048	3.9758	3.99834	8	3
H2-T24	3.69614	5.45413	5.09696	5.10206	11.0864	21.7326	47.5194	58.5484	0.56133	0.463618	0.46506	1.5847	2.55577	3.68443	3.98554	8	3
B2m	1531.12	2099.29	2057.41	2031.57	2479.81	2729.74	3994.42	4161.54	0.455314	0.426242	0.408008	0.695642	0.834176	1.3834	1.44253	8	3
Lmo4	27.4015	34.4383	67.1212	134.883	146.515	112.624	138.133	148.673	0.329759	1.29251	2.29938	2.41872	2.03919	2.33373	2.43982	8	3
Psme1	96.0922	96.0184	103.672	121.481	197.279	232.753	398.963	406.359	-0.00110843	0.109535	0.338239	1.03775	1.27631	2.05376	2.08026	8	3
Ly6e	135.663	103.888	102.958	89.6584	155.173	219.974	469.374	555.056	-0.384998	-0.397971	-0.597517	0.19385	0.697306	1.79071	2.03261	8	3
Tspo	199.095	229.055	234.333	226.29	285.085	337.658	693.166	719.93	0.202237	0.235103	0.184716	0.517935	0.762106	1.79974	1.8544	8	3
Chi3l1	16.3836	39.592	68.7027	69.7313	81.1497	75.5525	63.7128	98.8997	1.27296	2.06811	2.08955	2.30833	2.20523	1.95933	2.59371	8	3
Slc7a8	25.64	7.93442	23.427	40.2391	57.8908	81.6005	143.639	145.822	-1.6922	-0.130224	0.650202	1.17494	1.67018	2.48598	2.50774	8	3
Slamf7	6.42343	8.46017	9.7175	16.291	33.0255	46.728	50.9081	53.3678	0.397343	0.597241	1.34266	2.36216	2.86287	2.98648	3.05455	8	3
Cxcl16	90.2639	110.473	143.853	157.552	185.518	221.912	312.707	339.247	0.291473	0.672374	0.803607	1.03934	1.29777	1.79259	1.91012	8	3
Npc2	183.973	253.68	249.5	248.359	311.128	355.673	545.694	594.466	0.463516	0.439546	0.432933	0.758014	0.951057	1.5686	1.6921	8	3
9030425E11Rik	25.3824	16.3948	23.4213	52.6459	81.8645	92.0155	117.877	127.878	-0.63059	-0.116007	1.05249	1.68941	1.85805	2.21538	2.33287	8	3
Cav1	80.8055	40.0897	89.8067	174.806	266.756	272.103	251.778	294.954	-1.01122	0.15237	1.11323	1.723	1.75163	1.63963	1.86796	8	3
Ccl6	412.537	330.147	323.922	291.308	223.02	188.824	148.716	123.135	-0.321415	-0.348877	-0.501978	-0.88735	-1.12748	-1.47196	-1.74428	8	3
Sdc3	40.2518	48.7705	40.6814	38.6943	56.0215	91.9613	173.092	182.17	0.276955	0.015316	-0.0569322	0.476927	1.19197	2.10441	2.17816	8	3
Tgfbi	131.073	188.991	166.871	95.6091	65.5504	83.9684	205.102	441.543	0.527947	0.348363	-0.455151	-0.999694	-0.642452	0.645971	1.75218	8	3
Slc31a1	18.1056	24.6714	30.1225	40.1748	54.0114	61.6234	77.8814	89.512	0.446404	0.734406	1.14985	1.57683	1.76704	2.10484	2.30565	8	3
Arg1	768.267	1261.12	1119.63	794.69	610.838	684.717	1104.46	1878.61	0.715026	0.543342	0.0487844	-0.330818	-0.1661	0.523661	1.28999	8	3
Fgl2	3.71528	4.87366	5.17812	7.4885	18.2201	31.9111	32.043	32.7478	0.391535	0.478957	1.01121	2.29399	3.10252	3.10847	3.13986	8	3
Mmp19	160.343	189.452	152.459	148.289	106.539	98.4392	59.8592	44.362	0.240671	-0.0727401	-0.11275	-0.58978	-0.703857	-1.42152	-1.85377	8	3
Cd200	8.67513	8.56453	12.8554	27.6723	40.9944	44.0188	47.3741	52.1883	-0.0185113	0.567417	1.67349	2.24047	2.34316	2.44914	2.58877	8	3
Hspa8	631.414	871.712	1026.76	920.273	849.796	823.832	1030.88	1523.66	0.465265	0.701441	0.543476	0.42853	0.383764	0.707218	1.27088	8	3
Agrn	4.62205	6.54964	6.27372	11.6253	24.6833	32.6111	31.2961	33.7972	0.502883	0.440788	1.33066	2.41693	2.81876	2.75938	2.8703	8	3
S100a9	537.201	848.917	863.438	672.904	485.26	364.697	310.957	219.195	0.660162	0.684631	0.324939	-0.146704	-0.558764	-0.788747	-1.29325	8	3
Ddit4	75.0419	184.792	117.382	145.451	113.425	104.033	156.155	231.631	1.30013	0.645443	0.954765	0.59597	0.471273	1.05721	1.62606	8	3
Camp	6.06864	13.9894	18.9548	25.8383	27.0412	22.1089	33.0082	34.7165	1.20489	1.64312	2.09007	2.15571	1.86518	2.44338	2.51618	8	3
Shisa5	177.387	142.867	139.834	162.438	224.496	266.516	446.559	463.984	-0.312228	-0.343185	-0.127011	0.339789	0.587322	1.33195	1.38717	8	3
Ifnar2	82.0068	144.209	159.062	177.069	183.34	185.254	211.264	228.828	0.814346	0.955774	1.1105	1.16071	1.17569	1.36523	1.48045	8	3
Matk	19.3158	12.0244	12.7707	9.2694	5.20003	4.04771	2.10259	1.66378	-0.683817	-0.596944	-1.05923	-1.89319	-2.2546	-3.19954	-3.53724	8	3
Ckb	65.0791	62.4654	69.0416	78.6994	56.5319	50.0135	32.9085	18.1438	-0.059137	0.0852716	0.274158	-0.203129	-0.379877	-0.983734	-1.84272	8	3
Cybb	242.425	291.364	368.815	355.524	442.534	490.224	455.15	559.116	0.265284	0.605359	0.552408	0.86825	1.0159	0.908804	1.20561	8	3
Mmp8	681.878	438.766	376.225	419.933	331.31	386.407	334.383	303.429	-0.636062	-0.857918	-0.699354	-1.04133	-0.819392	-1.02801	-1.16815	8	3
C3	103.773	188.429	170.837	139.635	166.026	186.844	200.48	262.499	0.86059	0.719189	0.428229	0.677978	0.848403	0.950027	1.33888	8	3
H2-Q7	51.1221	75.7059	85.8966	67.0394	69.5885	73.2344	133.915	147.045	0.566459	0.748654	0.391062	0.444902	0.518574	1.3893	1.52424	8	3
Serpinb1a	2.03451	1.58818	1.3637	2.04472	3.52555	6.43627	19.6901	21.4979	-0.357307	-0.577155	0.00722193	0.793167	1.66154	3.27472	3.40144	8	3
Anxa6	26.0924	41.5736	37.6601	37.8005	38.7547	47.7988	73.0449	85.1642	0.672038	0.529407	0.534776	0.570742	0.873345	1.48515	1.70662	8	3
2010106G01Rik	28.6412	25.444	23.4084	28.5522	48.7174	61.9167	71.0276	93.304	-0.170766	-0.291066	-0.00449003	0.766345	1.11224	1.31029	1.70385	8	3
Hif1a	66.4745	91.3155	109.751	153.897	162.95	166.934	133.053	167.268	0.458059	0.723361	1.21109	1.29356	1.3284	1.00113	1.33129	8	3
Anxa5	293.452	183.711	286.757	425.744	487.001	494.301	600.531	610.595	-0.675687	-0.0332958	0.536862	0.7308	0.752265	1.03311	1.05709	8	3
Ptpn1	69.0608	61.0565	62.5868	69.8429	114.042	146.927	161.302	175.874	-0.177722	-0.142009	0.0162464	0.723626	1.08916	1.22383	1.3486	8	3
Siglece	1.71026	0.985446	1.88625	4.75514	5.34134	6.1123	11.3619	18.181	-0.795367	0.141305	1.47527	1.64299	1.8375	2.73192	3.41014	8	3
Il18bp	4.24209	5.78201	5.45565	6.24938	8.19486	10.6328	21.1754	25.1003	0.446796	0.362976	0.558938	0.949944	1.32567	2.31954	2.56486	8	3
Fyb	22.6095	23.2461	21.7154	25.0761	30.554	44.4429	65.4187	72.3927	0.0400596	-0.0582106	0.149384	0.434432	0.975024	1.53277	1.67892	8	3
Fcgr4	12.5705	13.1631	12.4369	8.3434	11.4313	16.3192	38.1287	50.8278	0.0664573	-0.0154151	-0.591335	-0.137053	0.376528	1.60084	2.01558	8	3
Serpinb9	17.5741	14.224	23.1625	29.3666	44.3328	50.161	51.3987	56.556	-0.305124	0.39834	0.740725	1.33492	1.51312	1.54828	1.68623	8	3
Fas	13.9977	28.1191	30.0436	39.3164	38.0871	36.522	42.1812	45.3613	1.00636	1.10187	1.48994	1.44411	1.38358	1.59141	1.69627	8	3
Msn	222.86	112.732	146.026	254.407	347.623	399.244	396.695	460.987	-0.983241	-0.609912	0.191001	0.641386	0.841133	0.831893	1.04859	8	3
Ppap2a	2.84984	1.71675	2.20763	4.56618	9.34186	12.5317	13.8305	19.4254	-0.731201	-0.368383	0.680107	1.71283	2.13663	2.2789	2.76899	8	3
Cpd	22.4885	33.5973	32.6022	42.5994	52.5778	62.1012	54.7961	65.0399	0.579158	0.535782	0.921646	1.22527	1.46543	1.28489	1.53214	8	3
Glipr2	26.6838	32.9332	29.6487	24.0999	31.9605	42.6009	66.887	78.6447	0.303579	0.152005	-0.146937	0.260326	0.67492	1.32576	1.55939	8	3
Abcc5	54.0143	44.7398	55.317	96.8124	117.431	111.274	121.638	131.339	-0.271783	0.0343815	0.84185	1.1204	1.0427	1.17118	1.28188	8	3
C1ra	9.86332	13.5451	11.9971	10.4653	15.3639	18.756	28.4804	38.7526	0.457626	0.28254	0.0854684	0.639399	0.927207	1.52982	1.97415	8	3
Rab5c	132.198	107.833	107.59	130.644	155.306	180.883	279.396	283.261	-0.293902	-0.297156	-0.0170595	0.232413	0.452356	1.07961	1.09943	8	3
Tmco3	6.10855	8.00343	7.60719	9.48233	14.2078	18.327	25.448	25.8604	0.389788	0.316534	0.634412	1.21778	1.58507	2.05865	2.08184	8	3
Tlr1	1.81352	2.06656	2.04374	3.09636	4.72045	7.60122	10.786	15.368	0.188439	0.172419	0.771781	1.38013	2.06744	2.5723	3.08306	8	3
Sdc1	58.7586	75.7345	86.078	95.8451	107.315	115.075	108.04	134.466	0.366151	0.550845	0.705905	0.86898	0.969703	0.878694	1.19437	8	3
Atp1a3	93.1995	104.903	88.4727	85.966	63.2726	58.9515	45.4284	39.245	0.170662	-0.0750899	-0.116556	-0.558741	-0.660794	-1.03673	-1.24781	8	3
Itgb5	43.563	46.3291	40.8414	34.8739	21.7886	18.4797	14.8091	14.736	0.0888153	-0.093071	-0.320956	-0.99953	-1.23716	-1.55662	-1.56376	8	3
Parp3	7.86537	5.6262	5.22178	5.39001	7.14493	11.8669	26.505	32.6387	-0.483354	-0.590973	-0.545227	-0.138595	0.593357	1.75268	2.053	8	3
Rac2	55.7581	64.4765	56.2622	73.8888	100.503	107.546	118.759	124.421	0.209592	0.0129846	0.406174	0.849985	0.947701	1.09078	1.15798	8	3
Acp5	45.9317	59.8706	63.1077	67.0112	69.5899	76.0202	81.1546	106.578	0.382358	0.458326	0.544912	0.599388	0.726893	0.821183	1.21435	8	3
Orm1	3.39332	4.26516	8.14757	7.31177	7.42334	7.78217	12.7417	17.9049	0.329902	1.26367	1.10752	1.12937	1.19748	1.90879	2.39959	8	3
Fbxl5	52.3647	61.1393	43.5398	35.4114	66.9054	82.6928	89.358	119.775	0.223505	-0.26626	-0.564381	0.353528	0.659167	0.771002	1.19366	8	3
Gpd2	6.81722	10.9495	14.194	15.0754	20.2336	22.6653	18.373	23.7355	0.68361	1.05803	1.14494	1.5695	1.73323	1.43033	1.79979	8	3
Apoc2	34.1416	29.265	27.8968	25.6121	16.29	17.1228	13.0043	11.0433	-0.222354	-0.291431	-0.414705	-1.06754	-0.995612	-1.39254	-1.62836	8	3
Clu	54.9825	66.058	74.2985	78.0429	94.9655	100.82	102.192	119.158	0.264761	0.434361	0.505295	0.788431	0.874737	0.894238	1.11583	8	3
Clcn7	20.4107	17.1274	28.4585	40.0906	43.6509	42.1071	48.4065	52.8004	-0.253019	0.479534	0.973938	1.09669	1.04474	1.24588	1.37122	8	3
S100a4	145.528	141.56	150.82	146.251	125.558	118.093	98.0668	72.3865	-0.0398831	0.051531	0.00714973	-0.212943	-0.301373	-0.56946	-1.0075	8	3
Tubb6	56.2098	77.2463	106.202	86.8794	77.5155	88.881	116.926	118.55	0.458644	0.917917	0.628192	0.463663	0.661053	1.0567	1.0766	8	3
H2-M3	10.7249	12.1789	14.6495	18.3585	16.8386	19.6131	30.7115	33.0373	0.18342	0.449887	0.775484	0.650808	0.870853	1.51781	1.62313	8	3
Igfbp4	14.5573	31.0369	26.5586	27.7185	27.5173	29.8179	30.6956	37.8474	1.09224	0.867436	0.929106	0.918596	1.03444	1.07629	1.37845	8	3
Dnaja1	16.4065	23.4892	30.8923	33.0465	28.6909	29.3868	36.7283	41.0248	0.51773	0.91298	1.01023	0.806326	0.840901	1.16262	1.32223	8	3
Ptgs1	13.8254	13.7965	11.5919	8.51057	5.71113	4.81894	3.30218	3.1185	-0.0030189	-0.254204	-0.699994	-1.27547	-1.52053	-2.06583	-2.1484	8	3
Sash1	6.40584	6.9837	14.6912	17.8737	10.2801	11.4546	16.4384	20.8925	0.124604	1.19749	1.48038	0.682395	0.838467	1.35961	1.70553	8	3
March1	25.9324	19.2297	10.5073	12.2948	37.394	59.2397	48.7798	61.2965	-0.431419	-1.30336	-1.07671	0.528051	1.19181	0.911528	1.24105	8	3
Lst1	60.4502	71.8605	71.393	62.4996	58.3425	52.7157	107.08	121.225	0.249452	0.240036	0.0480998	-0.0511999	-0.197514	0.82487	1.00387	8	3
Cept1	23.949	25.46	21.9653	23.2758	32.8164	42.0416	48.6153	55.1499	0.088267	-0.124739	-0.0411347	0.454452	0.811852	1.02145	1.20339	8	3
2210009G21Rik	3.03761	1.57349	4.81203	12.4919	7.98184	7.85804	7.83849	13.2245	-0.948969	0.663709	2.03998	1.39378	1.37123	1.36764	2.1222	8	3
Cacnb3	38.6929	45.0682	55.6236	66.4461	70.2628	67.2662	60.2228	77.9342	0.220041	0.523628	0.780116	0.860692	0.797813	0.638241	1.01019	8	3
Cpne2	26.8191	22.5977	25.6964	41.3663	46.6883	47.0281	50.1219	58.0652	-0.247085	-0.0616946	0.625195	0.7998	0.810262	0.90218	1.11441	8	3
Acap1	29.6364	33.8729	29.6661	22.5041	13.467	11.917	12.6356	11.6645	0.192761	0.00144507	-0.397182	-1.13794	-1.31435	-1.22988	-1.34525	8	3
Mocs1	18.0456	18.2422	24.4668	19.0525	20.9184	22.9888	41.4713	42.1842	0.0156326	0.439178	0.0783332	0.213125	0.349284	1.20047	1.22506	8	3
C1qb	48.1229	36.4994	44.2128	36.8358	34.193	35.5709	30.7316	22.3825	-0.398851	-0.122259	-0.385615	-0.493023	-0.436026	-0.647001	-1.10435	8	3
Casp3	22.5361	33.4617	26.2298	17.9896	16.0333	25.2503	46.6603	49.1482	0.570273	0.218969	-0.325075	-0.491166	0.164063	1.04996	1.1249	8	3
Serpinb6b	10.0358	20.1452	22.7449	19.2844	21.0683	22.3773	18.06	24.1359	1.00528	1.18039	0.942279	1.06992	1.15688	0.847642	1.26602	8	3
Sun2	29.339	33.6949	35.4988	42.7996	36.119	31.198	21.1876	13.8955	0.199711	0.274951	0.544778	0.299938	0.0886338	-0.4696	-1.0782	8	3
Rin3	24.026	34.2494	21.3809	25.6196	22.8035	15.488	10.55	10.4551	0.511482	-0.168274	0.0926515	-0.0753412	-0.633446	-1.18735	-1.20039	8	3
C1qbp	30.754	29.8858	28.9061	34.2024	28.9478	25.5788	21.3554	14.6642	-0.0413139	-0.0894001	0.153323	-0.0873204	-0.265825	-0.526173	-1.06848	8	3
Tspan4	16.9938	15.6624	13.3969	11.445	8.47029	7.02522	6.88251	6.09478	-0.117703	-0.343109	-0.570291	-1.00453	-1.27439	-1.304	-1.47936	8	3
Gnl3	13.0836	17.6825	21.9987	24.6053	17.958	12.963	7.18885	5.35966	0.434563	0.749659	0.91121	0.456867	-0.0133599	-0.863927	-1.28755	8	3
Syngr1	14.9373	19.3303	17.3261	21.2563	13.1535	13.468	11.5027	6.15285	0.371945	0.214028	0.508971	-0.183473	-0.149384	-0.376947	-1.27959	8	3
Itga4	6.98286	10.8967	11.332	7.9847	9.78614	12.9121	12.9185	18.3151	0.642001	0.698513	0.19342	0.486922	0.886834	0.887549	1.39114	8	3
Pdk3	7.90472	18.6013	17.0675	11.7463	10.1465	12.1275	16.8977	18.927	1.23462	1.11047	0.57142	0.360196	0.617496	1.09604	1.25966	8	3
S1pr2	25.8194	13.7587	4.68874	5.52205	13.1326	20.8161	45.7213	54.0544	-0.908111	-2.46118	-2.22518	-0.975303	-0.310756	0.824411	1.06596	8	3
Eng	4.79734	4.97712	4.02959	3.45359	5.07574	8.08963	14.6997	14.9714	0.0530765	-0.251602	-0.474138	0.0813835	0.753839	1.61548	1.6419	8	3
Cltb	11.5205	9.81787	9.4867	10.1214	8.50094	7.73921	6.39413	4.17327	-0.230721	-0.280225	-0.186794	-0.438509	-0.573945	-0.849383	-1.46495	8	3
C1qc	20.2113	15.8884	16.9588	16.4532	12.7269	15.0879	11.0602	9.09537	-0.347188	-0.253128	-0.296794	-0.667281	-0.42177	-0.869785	-1.15196	8	3
Ap3m2	5.61287	4.88083	4.28141	4.11569	6.96338	10.5372	13.5322	15.2674	-0.201612	-0.390653	-0.447604	0.311049	0.908681	1.26959	1.44364	8	3
Ppan	12.4679	5.94779	9.29661	19.6082	17.058	12.1487	8.04697	5.29482	-1.06779	-0.423442	0.653239	0.45223	-0.0374165	-0.631701	-1.23556	8	3
Phyh	8.15178	10.0853	9.53657	7.80698	7.17879	8.30116	14.2767	19.5794	0.307067	0.226355	-0.0623505	-0.183374	0.0261978	0.808476	1.26415	8	3
Ccdc115	26.455	24.8427	15.2925	15.4368	18.1383	15.1813	13.3121	12.928	-0.0907184	-0.790716	-0.777167	-0.544501	-0.801245	-0.990802	-1.03304	8	3
Cxcr2	9.81507	15.0228	13.5619	7.97253	5.33559	5.28625	5.15051	3.91806	0.614083	0.466489	-0.299961	-0.879351	-0.892754	-0.930283	-1.32486	8	3
Pi4k2b	8.75133	9.50381	8.70476	13.1746	16.2258	17.5837	17.9791	18.2311	0.119004	-0.00769777	0.590185	0.890715	1.00666	1.03875	1.05883	8	3
Cib2	10.4236	20.3389	18.2557	14.481	12.6808	8.18837	5.20269	4.87377	0.964388	0.808493	0.474308	0.282792	-0.348205	-1.00252	-1.09674	8	3
Lrrk2	5.12953	6.70899	7.02047	7.28164	6.90142	8.40355	10.0341	12.1111	0.387269	0.452741	0.505437	0.428067	0.712172	0.968013	1.23943	8	3
Nob1	10.3306	7.15493	6.93274	10.112	9.60857	8.43601	6.1996	4.37803	-0.529914	-0.575426	-0.0308557	-0.10453	-0.292291	-0.736677	-1.23857	8	3
Dgkd	12.7353	21.75	16.5514	8.84502	6.73476	7.40095	6.51524	6.14771	0.772182	0.37812	-0.525896	-0.919135	-0.783051	-0.966943	-1.05071	8	3
Ldhb	7.56898	10.1176	11.6489	10.3039	6.51995	6.8699	4.29886	3.23742	0.418696	0.622023	0.44502	-0.215238	-0.13981	-0.816145	-1.22525	8	3
Naip5	9.42656	12.9629	11.0479	7.12288	6.68939	10.5089	15.9111	19.0009	0.459585	0.228969	-0.404271	-0.494857	0.156808	0.75523	1.01126	8	3
Tsr1	9.61804	4.55049	5.98279	12.6381	10.8154	8.25021	4.22393	4.13456	-1.07972	-0.684925	0.393965	0.169272	-0.221312	-1.18716	-1.21801	8	3
Il1r1	6.75001	6.19019	8.56803	10.7782	10.9701	12.1356	8.58404	13.5617	-0.124906	0.344074	0.675155	0.700615	0.846284	0.346767	1.00658	8	3
