# Supplementary material for: Linking Transcriptional Changes over Time in Stimulated Dendritic Cells to Identify Gene Networks Activated during the Innate Immune Response
Source: PLoS Comput Biol. 2013 Nov 7;9(11):e1003323. doi: 10.1371/journal.pcbi.1003323 (PMC3820512; doi:10.1371/journal.pcbi.1003323)
Supplement: Table S16 — Genes showing greater than two-fold change in expression in MyD88-knockout dendritic cells between 0.5–8 hours after LPS stimulation. (XLSX) [file pcbi.1003323.s024.xlsx]

## Sheet: MyD88 knockout gene groups
Supporting Table S16.Genes showing greater than two-fold change in expression in MyD88 knockout DCs between 0.5 - 8 hours after LPS stimulation
Gene name	Unstimulated (0 hours)	Expression on LPS stimulation (FPKM)							Log fold change in expression							Time of expression	Time group
		0.5	1	2	3	4	6	8	0.5	1	2	3	4	6	8
H3f3b	9.25125	26.1167	13.7514	4.59584	5.16639	5.69679	7.62246	7.76142	1.49725	0.571858	-1.00932	-0.840492	-0.699499	-0.279392	-0.253328	0.5	1
Rpl32	7.83317	17.276	10.3586	5.02239	3.86898	4.48969	8.50489	8.90569	1.1411	0.403161	-0.641222	-1.01764	-0.80298	0.118696	0.185131	0.5	1
Lilrb4	41.8856	107.026	23.0666	17.5255	28.258	29.1045	24.1268	28.4693	1.35344	-0.860649	-1.257	-0.567795	-0.525212	-0.795818	-0.557047	0.5	1
Rab10	30.8924	252.204	24.4491	8.39791	23.7829	33.9995	40.5673	40.7379	3.02927	-0.337471	-1.87915	-0.377327	0.138262	0.393065	0.39912	0.5	1
Stfa3	11.8042	189.039	170.818	18.0499	13.11	12.2861	6.54262	5.15708	4.00131	3.85509	0.612691	0.151367	0.0577268	-0.85136	-1.19467	0.5	1
H2-Q7	7.61975	22.8558	13.14	4.61267	3.25067	2.68794	3.77871	4.52963	1.58474	0.78615	-0.724142	-1.22901	-1.50324	-1.01185	-0.75035	0.5	1
Gstp1	9.50046	25.2944	14.9081	11.393	5.56197	3.88004	7.46312	8.20546	1.41275	0.650027	0.262078	-0.772401	-1.29193	-0.348218	-0.211413	0.5	1
Mid1	33.6512	94.4836	55.8222	40.6668	18.8131	16.1969	25.1045	28.8329	1.48941	0.730181	0.273194	-0.83892	-1.05494	-0.422712	-0.222942	0.5	1
Rrs1	14.8695	38.7438	10.7285	3.73301	8.43496	8.34037	12.952	12.9744	1.38161	-0.470908	-1.99394	-0.817903	-0.834173	-0.199181	-0.196688	0.5	1
Ly96	19.1123	55.5369	27.681	15.731	12.1319	9.03507	12.9827	15.0776	1.53895	0.534395	-0.280891	-0.655696	-1.08089	-0.557911	-0.342095	0.5	1
Ptpn18	25.0952	61.8755	26.2736	11.6191	11.1466	11.2067	20.0913	28.3403	1.30196	0.0662024	-1.11091	-1.17081	-1.16305	-0.320841	0.175444	0.5	1
Map4k4	2.37523	13.8645	13.6346	3.79935	3.14954	1.83995	1.02058	1.00485	2.54526	2.52113	0.677685	0.407074	-0.368401	-1.21868	-1.24109	0.5	1
Il1r2	8.49822	18.7654	12.8348	9.77321	7.95331	6.31041	3.95964	4.0453	1.14284	0.594828	0.201672	-0.0956053	-0.429427	-1.10179	-1.07091	0.5	1
Nop58	12.4761	62.7086	50.7796	34.8377	23.5051	25.1124	15.2765	8.02887	2.3295	2.02508	1.48148	0.913807	1.00923	0.292147	-0.635898	0.5	1
Cxcr2	8.04699	18.5662	14.0761	10.1594	8.48364	7.80669	7.95673	8.85537	1.20616	0.806727	0.336294	0.0762342	-0.0437383	-0.0162736	0.138103	0.5	1
Pnkd	21.1143	108.823	102.777	86.8089	55.9809	44.8059	29.7358	21.5999	2.36569	2.28323	2.03962	1.40671	1.08547	0.49398	0.0328042	0.5	1
Gmppa	18.523	37.5176	26.7684	20.3163	19.9615	19.8561	17.4312	18.771	1.01825	0.531213	0.13332	0.107902	0.100265	-0.0876459	0.0191877	0.5	1
Gpc1	36.9595	108.038	41.0102	19.0422	23.1831	22.4022	20.7341	22.6758	1.54752	0.150038	-0.956745	-0.672872	-0.722305	-0.83394	-0.704792	0.5	1
Atg4b	116.699	493.65	185.95	83.9788	95.8389	91.3762	74.4911	85.2768	2.0807	0.672123	-0.474695	-0.284109	-0.352902	-0.647652	-0.452567	0.5	1
Ctse	20.1135	47.8472	36.0388	30.5203	31.1686	24.0875	18.7697	16.2148	1.25027	0.841387	0.601605	0.631929	0.260121	-0.0997586	-0.310853	0.5	1
Chi3l1	82.7755	298.001	191.497	86.3076	92.2031	143.76	227.239	191.191	1.84804	1.21005	0.0602838	0.155611	0.796387	1.45693	1.20774	0.5	1
Csrp1	21.7025	107.256	73.6544	57.4632	67.7612	77.7624	63.7456	48.3523	2.30513	1.76291	1.40478	1.6426	1.84121	1.55446	1.15572	0.5	1
Uchl5	4.47486	16.1646	15.3445	13.8868	11.4282	9.12809	8.08613	7.06464	1.85292	1.77781	1.6338	1.35268	1.02847	0.853607	0.658773	0.5	1
Fam129a	20.2802	49.7163	29.5092	22.8082	17.399	18.023	29.759	34.3072	1.29365	0.541093	0.169481	-0.221067	-0.170233	0.553254	0.75844	0.5	1
Tor1aip2	56.6998	121.542	40.1614	39.8904	38.614	46.5866	83.6588	84.9307	1.10004	-0.497534	-0.507302	-0.55422	-0.283429	0.561174	0.582942	0.5	1
Dedd	14.391	29.5322	25.6603	20.9786	14.9259	12.0634	11.186	10.9211	1.03712	0.834371	0.543752	0.0526511	-0.25453	-0.363473	-0.398049	0.5	1
F11r	4.48539	69.8051	21.6769	6.63092	6.68298	7.91981	7.56091	7.05618	3.96003	2.27285	0.563976	0.575258	0.820232	0.753326	0.653654	0.5	1
Tram1	9.03247	19.5641	14.476	7.39937	5.05441	4.89195	6.50035	5.96485	1.11502	0.680471	-0.287718	-0.837578	-0.884711	-0.474603	-0.598635	0.5	1
Slc40a1	9.27715	21.7447	16.6532	13.5976	13.1857	12.3507	9.02995	8.79797	1.22891	0.844046	0.551598	0.507221	0.412839	-0.0389637	-0.076511	0.5	1
Ankrd44	40.3749	91.5585	65.0662	52.178	44.8409	43.1597	44.5922	37.9301	1.18124	0.68845	0.369983	0.151357	0.0962262	0.143333	-0.0901155	0.5	1
Clk1	9.39441	20.616	14.6671	11.0139	7.65664	6.56413	8.6323	11.1432	1.13389	0.642709	0.229451	-0.295091	-0.517199	-0.122058	0.246289	0.5	1
Sp110	49.8374	120.92	62.3689	32.318	30.1931	30.5751	36.8352	40.6934	1.27875	0.323598	-0.624891	-0.72301	-0.704872	-0.436144	-0.292434	0.5	1
Pde6d	13.8841	37.0759	28.1874	23.7753	22.511	22.4866	19.9617	15.5512	1.41705	1.02162	0.77603	0.697196	0.695632	0.523801	0.163592	0.5	1
Stk25	54.2761	146.478	96.7262	74.1925	61.1693	60.8189	57.8103	52.9584	1.4323	0.83359	0.450956	0.172491	0.164203	0.0910095	-0.0354575	0.5	1
Thap4	60.8623	260.439	144.058	76.7291	37.8988	39.0795	57.4908	59.6835	2.09732	1.24303	0.334225	-0.683397	-0.639137	-0.0822177	-0.0282167	0.5	1
Cxcr4	11.7623	28.4165	22.4641	12.9778	9.73423	9.25299	7.48851	9.62454	1.27256	0.933451	0.141876	-0.273031	-0.346179	-0.65142	-0.289381	0.5	1
Mapkapk2	37.9354	208.855	76.848	33.9131	34.5861	34.6349	36.9481	40.2054	2.46089	1.01846	-0.161702	-0.133352	-0.131318	-0.0380446	0.0838445	0.5	1
Pla2g4a	5.52621	14.214	10.6519	7.37094	7.72432	6.97405	5.96637	6.15271	1.36295	0.946748	0.415558	0.483118	0.335706	0.110563	0.154932	0.5	1
Rnf2	174.688	559.889	395.215	317.777	243.85	237.728	228.297	188.061	1.68036	1.17786	0.863234	0.481213	0.444531	0.386131	0.10642	0.5	1
Mgst3	9.80863	24.3297	19.2749	13.9722	10.756	11.2374	9.38047	9.29168	1.31059	0.9746	0.510436	0.133018	0.196185	-0.0643914	-0.0781122	0.5	1
Fcgr2b	9.68068	25.9487	16.6069	9.85663	6.38569	5.99877	5.14316	5.67614	1.42248	0.778602	0.0259861	-0.600266	-0.690442	-0.912453	-0.770198	0.5	1
Sdhc	10.6975	26.4567	17.5583	15.4715	12.0024	11.5092	8.92513	9.65001	1.30636	0.714879	0.532339	0.166049	0.105514	-0.261329	-0.148671	0.5	1
Ufc1	81.3892	282.606	239.2	155.378	100.64	89.3601	83.5222	84.1833	1.79588	1.55531	0.932873	0.306295	0.134793	0.0373223	0.0486967	0.5	1
Ncstn	13.3278	95.0786	69.7329	26.0484	18.6787	18.5006	14.4398	16.201	2.83468	2.3874	0.966756	0.486955	0.473133	0.115612	0.281644	0.5	1
Ifi202b	68.9698	233.28	142.368	83.9104	43.096	43.1985	51.8102	44.608	1.75803	1.04559	0.282885	-0.678411	-0.674984	-0.412729	-0.628662	0.5	1
Ephx1	83.2953	225.504	138.302	100.663	78.1824	71.0015	75.3952	79.2042	1.43685	0.731515	0.273227	-0.0913912	-0.230386	-0.143762	-0.0726582	0.5	1
Snx3	6.73951	14.8279	11.6682	12.1889	11.8933	11.0379	10.054	8.23351	1.1376	0.791866	0.854852	0.819433	0.71175	0.577054	0.288864	0.5	1
Atg5	127.573	324.594	192.569	140.643	159.26	139.011	143.901	127.187	1.34731	0.594052	0.140715	0.320061	0.123876	0.173754	-0.00437181	0.5	1
Sar1a	31.9864	227.86	118.222	39.1606	32.1775	43.6435	62.1344	47.5621	2.83262	1.88597	0.291944	0.00859361	0.448308	0.957934	0.572354	0.5	1
Pttg1ip	231.065	629.87	345.186	188.291	218.079	240.333	272.798	265.687	1.44676	0.579075	-0.295335	-0.0834479	0.056736	0.239534	0.201429	0.5	1
Ptbp1	5.77805	13.265	12.7634	9.0345	6.47068	5.39107	5.47815	4.89952	1.19897	1.14336	0.644862	0.163335	-0.100011	-0.0768939	-0.237942	0.5	1
Atp5d	6.26414	20.639	15.7205	7.6782	6.51633	6.89528	6.42536	5.8434	1.72018	1.32746	0.293652	0.0569432	0.138493	0.0366608	-0.100308	0.5	1
Adat3	588.079	1381.14	1288.17	1336.32	1313.05	1192.22	840.765	661.749	1.23178	1.13124	1.18418	1.15884	1.01957	0.515693	0.170274	0.5	1
Csnk1g2	8.82568	28.2315	21.3135	14.0008	10.7176	10.733	10.4006	9.98022	1.67753	1.27199	0.66573	0.280203	0.282274	0.236887	0.177364	0.5	1
2510012J08Rik	21.2333	83.6965	61.2531	31.4498	24.562	28.1751	20.1533	16.1128	1.97884	1.52845	0.566722	0.210099	0.408092	-0.0753125	-0.398121	0.5	1
Ccdc53	26.4146	74.5864	52.1294	42.0063	26.6805	21.333	21.9619	26.0991	1.49758	0.980762	0.66927	0.0144501	-0.308249	-0.266333	-0.0173355	0.5	1
Ctdsp2	6.54644	14.9087	10.7572	9.0435	7.84978	9.1745	10.2762	8.37736	1.18737	0.71652	0.466171	0.261942	0.486919	0.650524	0.355785	0.5	1
Cd63	10.0834	22.913	13.7462	9.78855	8.17271	7.53504	7.21703	7.02633	1.18418	0.447051	-0.0428151	-0.303096	-0.420295	-0.482505	-0.521139	0.5	1
Pcmt1	8.01246	17.722	12.944	8.81538	5.95936	5.77574	8.01184	8.74301	1.14522	0.691966	0.137778	-0.427088	-0.472239	-0.000111639	0.125885	0.5	1
1700021F05Rik	5.97403	16.1179	14.9948	12.6686	8.67548	6.35302	5.60473	6.05702	1.43189	1.32769	1.08448	0.538239	0.0887381	-0.0920596	0.0199037	0.5	1
Serinc1	17.8785	79.2348	48.2577	33.0292	41.2121	39.9443	27.5372	20.7475	2.14791	1.43253	0.885516	1.20484	1.15976	0.623156	0.214712	0.5	1
Srgn	9.06572	19.1464	18.5363	13.2224	10.7328	11.0934	11.6628	9.71981	1.07858	1.03186	0.544491	0.243533	0.291208	0.363421	0.100507	0.5	1
Sirt1	42.5416	119.246	86.7865	64.7451	52.6676	55.0007	66.3182	59.6268	1.48699	1.0286	0.605897	0.308041	0.370576	0.640531	0.487087	0.5	1
Ube2d1	35.8116	104.58	98.1622	59.5191	62.8016	64.787	46.249	39.3753	1.54611	1.45474	0.732926	0.810374	0.855277	0.368995	0.136864	0.5	1
Btbd2	4.22111	15.91	14.8998	11.8088	6.5256	6.43992	3.82586	2.46378	1.91424	1.8196	1.48417	0.628488	0.60942	-0.141838	-0.776749	0.5	1
Scyl2	9.41663	34.6808	23.8655	16.8018	9.30218	7.69935	7.93824	9.21089	1.88085	1.34164	0.835333	-0.017642	-0.290474	-0.246392	-0.0318703	0.5	1
Apaf1	37.5996	107.536	77.4597	44.7477	32.3178	27.7569	26.1929	24.1761	1.51603	1.04273	0.251096	-0.218388	-0.437871	-0.521542	-0.637136	0.5	1
Dyrk2	22.9044	54.7097	44.2137	32.8931	22.1659	20.8419	22.3754	26.9556	1.25617	0.948869	0.52216	-0.0472828	-0.136138	-0.0337113	0.23496	0.5	1
Tmem5	11.431	27.825	18.5854	10.895	8.06349	7.58106	9.54741	11.3604	1.28343	0.701218	-0.0692854	-0.503475	-0.59248	-0.25977	-0.00893799	0.5	1
Dgka	4.53457	10.8327	9.66142	10.8298	6.66833	6.27617	4.88869	4.31565	1.25636	1.09127	1.25597	0.55636	0.468919	0.108482	-0.0713879	0.5	1
Xbp1	9.12544	56.7318	38.7447	14.0747	7.18559	7.53459	8.41816	9.357	2.63619	2.08603	0.625138	-0.344788	-0.276365	-0.116389	0.0361519	0.5	1
Zmiz2	11.904	26.3422	16.1224	12.2187	8.54598	8.8331	9.132	9.90087	1.14593	0.43762	0.0376444	-0.478129	-0.430455	-0.382444	-0.265819	0.5	1
Ppia	7.88994	16.4858	13.0395	10.047	7.80565	7.3117	7.08183	10.8212	1.06314	0.724802	0.348679	-0.0154956	-0.109807	-0.155892	0.455774	0.5	1
Ramp3	25.5633	56.1598	50.3158	35.5691	41.088	44.3539	39.9635	29.3682	1.13546	0.976937	0.47655	0.684643	0.794987	0.644609	0.200181	0.5	1
Sertad2	8.08027	31.295	17.1228	11.5049	6.24652	5.18163	6.59612	6.84273	1.95346	1.08344	0.509773	-0.371351	-0.640997	-0.292786	-0.239831	0.5	1
Peli1	75.0759	389.983	134.878	85.8586	123.033	139.748	115.459	91.2665	2.37699	0.845233	0.193613	0.712624	0.896406	0.620959	0.281736	0.5	1
Xpo1	13.6326	32.1665	23.406	16.6741	13.3372	10.595	10.6563	13.0071	1.2385	0.779818	0.290548	-0.0316049	-0.363677	-0.355354	-0.0677614	0.5	1
Pnpt1	750.526	2359.58	1537.88	1194.51	814.014	701.063	638.058	660.325	1.65256	1.03497	0.670445	0.117152	-0.098358	-0.234214	-0.184726	0.5	1
Smek2	13.9685	90.2821	64.7179	30.1483	19.8653	18.0723	17.0964	16.6533	2.69226	2.21199	1.1099	0.508073	0.371603	0.291515	0.253631	0.5	1
Mapk9	16.0527	35.1457	22.8331	12.8633	16.7096	17.6998	18.1148	17.4697	1.13053	0.508311	-0.319555	0.0578612	0.140917	0.174353	0.122039	0.5	1
Vdac1	288.321	1133.73	948.055	860.894	753.709	638.57	398.822	244.878	1.97533	1.71729	1.57816	1.38633	1.14717	0.468069	-0.235613	0.5	1
Aff4	888.939	1805.35	1455.97	1384.11	1380.8	1288.45	950.928	682.242	1.02212	0.711824	0.638802	0.635348	0.53548	0.0972517	-0.381801	0.5	1
Sap30l	131.764	806.488	346.818	154.057	187.67	197.17	147.698	149.353	2.6137	1.39622	0.225508	0.510242	0.581484	0.164694	0.18077	0.5	1
Gps2	10.5427	21.7221	16.3767	14.313	16.7027	19.8488	17.554	13.9063	1.04292	0.6354	0.441082	0.663837	0.912807	0.735555	0.399494	0.5	1
Ankfy1	6.84006	14.8169	14.2153	10.9729	8.73541	8.54838	5.93216	5.29356	1.11516	1.05536	0.681864	0.352866	0.321642	-0.205451	-0.369771	0.5	1
Tax1bp3	19.4306	45.672	35.7327	33.1349	26.9753	24.5988	20.9608	20.8269	1.23298	0.878914	0.770021	0.473309	0.340257	0.109363	0.100118	0.5	1
Mnt	192.149	431.943	309.452	236.984	238.772	265.757	303.717	285.819	1.16862	0.68749	0.302564	0.313408	0.467882	0.660502	0.572876	0.5	1
Ap2b1	3.34707	12.7958	11.7141	4.38922	2.26359	2.07714	1.88415	2.33183	1.9347	1.80728	0.391066	-0.564286	-0.6883	-0.828985	-0.521436	0.5	1
Ccl4	3.50781	21.181	11.9567	3.36722	2.44466	3.46455	3.95982	3.24879	2.59413	1.76918	-0.0590126	-0.520937	-0.0179026	0.174864	-0.110668	0.5	1
Lrrc59	3.46809	64.1486	15.8998	4.0955	3.68198	4.02956	2.63341	2.72886	4.2092	2.1968	0.239898	0.0863405	0.216481	-0.397209	-0.345843	0.5	1
Mlx	30.7793	12.5154	18.6246	25.97	32.3696	31.7692	30.6304	31.0285	-1.29826	-0.724751	-0.245114	0.0726791	0.0456683	-0.00699621	0.0116335	0.5	1
Vps25	19.4802	9.57792	13.4724	19.6664	20.2812	17.496	14.4636	12.2729	-1.02422	-0.532002	0.0137244	0.0581345	-0.154983	-0.429582	-0.666532	0.5	1
Psme3	14.4376	5.82563	15.26	17.4182	12.9795	9.62622	6.34137	5.94975	-1.30934	0.079924	0.270765	-0.153596	-0.58479	-1.18696	-1.27893	0.5	1
Ifi35	35.7882	17.5378	19.8442	25.7355	28.4718	25.269	19.0329	20.2884	-1.02902	-0.850767	-0.475724	-0.32995	-0.502115	-0.910989	-0.818829	0.5	1
Grn	27.1029	12.5222	17.2471	20.0573	19.7326	17.5984	16.6608	21.7399	-1.11396	-0.652093	-0.43432	-0.457866	-0.623003	-0.70199	-0.318102	0.5	1
Mrps7	18.6421	8.78187	17.4182	23.0285	19.7507	16.2098	10.8706	10.4314	-1.08596	-0.0979688	0.304856	0.0833394	-0.201698	-0.778133	-0.837632	0.5	1
Baiap2	10.2978	4.9437	10.1249	11.7524	9.89837	9.84198	12.0581	11.718	-1.05867	-0.0244285	0.190619	-0.0570733	-0.0653157	0.227666	0.18639	0.5	1
Hgs	27.0344	12.3181	16.5951	23.3494	24.1187	21.9006	14.9519	14.7401	-1.13402	-0.704039	-0.211411	-0.164644	-0.303826	-0.854468	-0.87505	0.5	1
Slc16a3	35.9689	17.9174	25.3909	34.2844	39.2837	36.6826	29.8089	30.452	-1.00539	-0.502439	-0.0691978	0.127181	0.0283459	-0.271007	-0.240213	0.5	1
Uqcr10	24.5618	11.4704	16.3345	28.3871	30.4392	27.4472	25.0815	18.7899	-1.0985	-0.588494	0.208819	0.309514	0.160243	0.0302073	-0.386459	0.5	1
Ewsr1	19.296	8.97586	11.5166	15.4642	17.0992	18.6982	18.5269	17.6792	-1.10418	-0.744587	-0.31937	-0.174373	-0.0454024	-0.0586803	-0.126249	0.5	1
Tbrg4	82.5295	40.343	51.1704	81.1207	101.504	100.878	103.145	101.58	-1.03259	-0.6896	-0.0248398	0.298555	0.28963	0.321692	0.299635	0.5	1
Tns3	18.0528	8.64922	10.7834	11.276	12.4606	12.8145	17.3845	17.2127	-1.06158	-0.74341	-0.678967	-0.534849	-0.494445	-0.054421	-0.0687492	0.5	1
Ahsa2	148.23	72.544	112.406	163.381	202.874	227.992	263.918	245.019	-1.03091	-0.399118	0.140403	0.452747	0.621146	0.832252	0.725056	0.5	1
Cnot6	20.57	8.14831	9.54147	11.3401	15.1146	17.7597	21.0789	21.41	-1.33597	-1.10826	-0.859108	-0.444599	-0.211935	0.0352578	0.057743	0.5	1
Ltc4s	16.812	5.87956	12.4694	18.1851	19.8574	17.0559	11.2786	11.0822	-1.51571	-0.431099	0.113265	0.240185	0.0207795	-0.575903	-0.601247	0.5	1
Rmnd5b	52.6988	25.7155	28.3367	33.16	36.3188	31.8317	39.9404	52.759	-1.03513	-0.895098	-0.668326	-0.537054	-0.727306	-0.399921	0.00164711	0.5	1
Uqcrq	12.56	6.02857	6.66583	9.3654	10.2652	9.35886	8.87688	9.03106	-1.05895	-0.91398	-0.423424	-0.291075	-0.424432	-0.500712	-0.475869	0.5	1
Slc22a4	57.1171	28.5088	41.8733	62.439	69.1032	66.4183	51.8091	45.6862	-1.00252	-0.447892	0.128525	0.27483	0.217658	-0.140717	-0.322164	0.5	1
Cdc42se2	16.5208	6.43522	8.25479	10.623	12.5827	10.7913	11.1589	12.267	-1.36022	-1.00098	-0.637092	-0.392842	-0.614415	-0.566089	-0.429501	0.5	1
Atox1	73.1338	28.3265	35.3923	50.0976	76.3996	79.6963	67.1489	54.7174	-1.36839	-1.0471	-0.545797	0.0630268	0.123974	-0.123175	-0.418539	0.5	1
Guk1	22.4112	9.60625	10.0683	10.5215	12.4557	11.7317	10.0909	10.9763	-1.22217	-1.1544	-1.09088	-0.847414	-0.933808	-1.15117	-1.02983	0.5	1
Srebf1	13.057	5.62914	6.94591	8.02849	12.6656	13.2275	13.8092	13.6469	-1.21384	-0.910588	-0.701623	-0.043908	0.018717	0.0808063	0.0637498	0.5	1
Flii	6.63213	3.22905	5.59376	10.0916	11.5169	11.8595	9.48478	8.35468	-1.03836	-0.245654	0.605611	0.796208	0.838499	0.516142	0.333112	0.5	1
Tmem11	73.4715	34.27	53.7711	78.9846	95.5248	96.9505	86.4997	70.1168	-1.10024	-0.450354	0.104387	0.378691	0.400064	0.23551	-0.0674246	0.5	1
Polr2a	24.0573	10.3537	21.4725	34.7013	25.0288	16.3987	14.4658	16.7424	-1.21633	-0.163985	0.528515	0.0571144	-0.552893	-0.733829	-0.522968	0.5	1
Slc25a11	280.965	131.828	159.188	220.203	274.204	295.532	342.563	319.43	-1.09173	-0.819659	-0.351556	-0.0351408	0.0729239	0.285979	0.185109	0.5	1
Spag7	82.3825	37.616	54.5077	71.6819	93.7369	90.0704	84.4452	78.9628	-1.13099	-0.595878	-0.200729	0.186279	0.128715	0.0356775	-0.0611648	0.5	1
Glod4	12.3249	6.12394	6.99329	10.6422	12.348	10.6188	9.06423	8.46885	-1.00904	-0.817533	-0.21178	0.00270145	-0.214955	-0.44332	-0.541338	0.5	1
Taok1	9.52533	4.24554	6.02561	8.3823	10.1445	10.4117	10.5935	8.63953	-1.16582	-0.660662	-0.184423	0.0908568	0.128365	0.153338	-0.140816	0.5	1
Rpl23a	15.4211	6.24559	10.0302	14.2618	16.7519	11.8641	7.03717	8.20025	-1.304	-0.620555	-0.11275	0.119419	-0.378303	-1.13184	-0.911166	0.5	1
Rffl	13.7568	6.43641	9.43416	12.6244	14.9195	14.2522	11.5051	11.0131	-1.09582	-0.544179	-0.12393	0.117054	0.0510397	-0.257871	-0.320924	0.5	1
Ccl6	56.4573	22.598	63.5507	104.461	87.6999	69.2641	47.0435	43.1308	-1.32097	0.170748	0.887732	0.635415	0.294948	-0.263165	-0.388442	0.5	1
1200011M11Rik	13.1718	6.2686	8.56535	13.6802	14.2314	12.0403	11.0177	10.2061	-1.07124	-0.620868	0.0546368	0.111625	-0.129581	-0.257629	-0.368021	0.5	1
Nme1	15.0656	6.87997	8.71544	10.7138	12.2446	11.6927	9.57722	10.2757	-1.13078	-0.789613	-0.491788	-0.299112	-0.36565	-0.653579	-0.552021	0.5	1
Luc7l3	16.0465	7.8513	9.59227	13.1148	13.916	13.8173	15.7166	14.6028	-1.03126	-0.742314	-0.291063	-0.205514	-0.215783	-0.0299695	-0.136014	0.5	1
Cdk5rap3	13.2779	5.91315	7.19475	11.6075	13.1786	12.9333	12.7356	11.8151	-1.16703	-0.884011	-0.19397	-0.0108299	-0.0379366	-0.0601601	-0.168395	0.5	1
Med1	31.2082	12.7871	26.5583	49.8971	41.5597	41.4037	52.0947	48.5106	-1.28724	-0.232762	0.677031	0.41326	0.407835	0.739211	0.636375	0.5	1
Dhx58	4289.28	1865.34	2476.4	3000.48	4438.53	5654.5	7424.32	6773.33	-1.2013	-0.792491	-0.515542	0.0493465	0.398664	0.791523	0.65913	0.5	1
Rab5c	65.1658	28.6457	56.9768	112.808	129.777	120.3	110.231	88.5879	-1.1858	-0.19374	0.791682	0.993848	0.88445	0.758343	0.442995	0.5	1
Stat5b	63.8148	25.4937	27.3351	25.8242	34.0439	37.2322	52.6414	72.0367	-1.32375	-1.22314	-1.30517	-0.906495	-0.77734	-0.277693	0.174841	0.5	1
Stat3	15.2453	6.51918	8.74629	12.0739	13.3695	12.8319	10.2343	10.2513	-1.2256	-0.801621	-0.336473	-0.189419	-0.24863	-0.574952	-0.572558	0.5	1
Becn1	12.806	6.02216	9.34621	11.7738	10.511	8.91932	7.92901	7.55971	-1.08847	-0.454367	-0.12124	-0.28492	-0.521814	-0.691607	-0.760417	0.5	1
Dusp3	289.528	139.84	210.361	254.648	314.249	325.811	319.025	259.617	-1.04993	-0.460836	-0.185198	0.118205	0.170332	0.139967	-0.157318	0.5	1
Gosr2	12.4403	5.72825	6.89831	9.14983	12.3508	12.8184	11.9402	10.7839	-1.11885	-0.850706	-0.443204	-0.0104168	0.0431949	-0.0591943	-0.206142	0.5	1
Nt5c	15.6253	7.12357	8.84662	11.2431	12.5242	13.9661	11.1364	11.2118	-1.13321	-0.820686	-0.474844	-0.319165	-0.161955	-0.488601	-0.478866	0.5	1
Sumo2	11.3898	5.65376	7.98597	9.55069	10.8618	11.5837	10.3915	8.53185	-1.01046	-0.512203	-0.254066	-0.0684792	0.0243537	-0.132338	-0.416812	0.5	1
Grb2	22.3258	11.1266	12.3105	15.1663	17.5395	21.5531	20.6927	16.6204	-1.0047	-0.858823	-0.557843	-0.348104	-0.0508165	-0.10959	-0.425757	0.5	1
Wbp2	12.5859	6.13951	9.38995	9.58059	12.0291	11.2526	11.1074	12.0917	-1.03561	-0.422619	-0.393622	-0.0652797	-0.16155	-0.180287	-0.0577913	0.5	1
Mrpl38	32.2391	9.97987	13.7773	22.3514	31.7252	34.9957	32.0861	29.117	-1.69172	-1.22652	-0.528446	-0.0231822	0.118366	-0.00686303	-0.14695	0.5	1
Srp68	82.8665	33.6012	44.6744	44.5327	58.34	61.9817	69.8266	72.0133	-1.30228	-0.891341	-0.895924	-0.506304	-0.418947	-0.247012	-0.202526	0.5	1
Csnk1d	54.7947	22.2405	29.9061	35.2289	48.4432	49.0505	52.5044	46.8506	-1.30085	-0.873597	-0.637277	-0.177742	-0.159769	-0.061598	-0.225969	0.5	1
Sdc1	177.827	82.5446	91.131	100.736	115.242	117.998	135.027	173.336	-1.10723	-0.964461	-0.819895	-0.625808	-0.591712	-0.397226	-0.0369031	0.5	1
Laptm4a	130.812	54.8064	76.2032	92.27	99.43	108.636	125.348	131.784	-1.25508	-0.779571	-0.503561	-0.395742	-0.267993	-0.0615559	0.0106803	0.5	1
Hpcal1	11.7961	5.87321	8.80709	13.1338	12.1169	11.4864	10.5406	10.4747	-1.00609	-0.421573	0.154974	0.0387107	-0.0383833	-0.162353	-0.171401	0.5	1
Mif	7.03201	2.96012	39.8011	29.7917	14.2287	12.2682	10.158	6.75902	-1.24828	2.5008	2.0829	1.01679	0.802915	0.530607	-0.057123	1	1
Uba52	8.52629	16.6098	22.8422	9.05366	4.63647	4.14492	6.2505	7.05288	0.962045	1.42171	0.086583	-0.878891	-1.04057	-0.447947	-0.273706	1	1
Kpna2	46.8485	119.949	195.92	137.551	131.923	111.355	30.8414	13.699	1.35635	2.06419	1.55389	1.49362	1.24909	-0.603135	-1.77393	1	1
Mrps9	0.489417	3.66034	29.2889	10.9478	4.31351	2.79604	0.462416	0.22607	2.90284	5.90315	4.48343	3.13973	2.51425	-0.0818729	-1.11429	1	1
Bzw1	7.50489	12.4796	18.848	7.18433	3.32601	3.28874	3.67585	2.62125	0.733669	1.32851	-0.0629773	-1.17404	-1.1903	-1.02975	-1.51758	1	1
Ctdsp1	14.9501	14.2861	64.1201	52.8445	51.0019	57.0586	48.2227	30.8809	-0.065543	2.10062	1.8216	1.7704	1.93229	1.68956	1.04656	1	1
Ppp1r15b	30.9863	58.3586	97.8156	41.7419	70.9618	91.6855	49.4737	29.59	0.913315	1.65843	0.429866	1.19541	1.56506	0.675031	-0.0665208	1	1
Ptpn7	3.09089	7.16927	14.5082	13.8213	8.98243	8.88993	8.86502	6.41473	1.2138	2.23077	2.1608	1.53908	1.52415	1.5201	1.05337	1	1
Ivns1abp	35.4369	88.4141	108.923	78.9911	61.8139	49.1355	25.8355	21.1848	1.31902	1.61998	1.15644	0.802679	0.471513	-0.455898	-0.742223	1	1
Glul	29.6692	92.2549	233.579	89.6328	55.5752	56.7228	47.5271	38.6987	1.63666	2.97687	1.59506	0.905475	0.934963	0.679784	0.383319	1	1
Mrps14	5.59899	8.13909	14.2507	10.5817	7.97659	7.28916	6.72162	4.90483	0.539701	1.34779	0.918333	0.510606	0.380586	0.263642	-0.190963	1	1
Pfdn2	41.0355	87.1542	127.701	74.2012	61.5682	65.2134	70.0951	49.8015	1.0867	1.63783	0.85457	0.585313	0.668296	0.772441	0.279317	1	1
Parp1	9.06463	20.1282	22.057	19.3459	10.2123	8.43153	10.163	8.87793	1.1509	1.28292	1.09371	0.171988	-0.104454	0.165006	-0.0300248	1	1
Cnih4	29.9329	56.4994	145.53	90.0635	66.1588	64.6013	37.1804	30.1681	0.916503	2.28151	1.58921	1.1442	1.10983	0.31281	0.0112918	1	1
Cops5	10.4865	22.4235	207.154	142.478	130.931	130.27	31.549	14.2696	1.09648	4.3041	3.76413	3.6422	3.6349	1.58906	0.444412	1	1
Smap1	15.0025	25.1137	33.2446	17.1944	10.8939	9.53402	11.8259	13.4883	0.743272	1.14792	0.196736	-0.461682	-0.654046	-0.343253	-0.153494	1	1
Txndc9	5.01156	12.4403	26.2139	11.1258	8.50549	8.98602	7.82367	5.82792	1.31169	2.387	1.15058	0.763135	0.842423	0.642586	0.217721	1	1
Obfc2a	26.7061	42.8262	55.8126	41.8931	28.6618	26.0339	25.9251	25.9869	0.681324	1.06342	0.649543	0.10196	-0.0367779	-0.0428198	-0.0393848	1	1
Myo1b	56.6844	69.5636	123.17	80.8742	62.4211	56.528	54.7173	49.3135	0.295381	1.11963	0.512728	0.139082	-0.00398609	-0.0509547	-0.200969	1	1
Ndufs1	4.31619	38.3631	41.1107	20.5122	20.4472	23.4548	9.97161	5.38309	3.15189	3.25168	2.24865	2.24407	2.44205	1.20807	0.318676	1	1
Acadl	24.0734	43.6491	65.6796	27.7099	28.6544	31.0513	32.7716	30.3591	0.858512	1.44801	0.202962	0.251317	0.367214	0.445006	0.334689	1	1
Tuba4a	5.72646	25.3185	46.2061	41.4451	17.1311	10.1677	4.29486	3.14673	2.14448	3.01237	2.85549	1.5809	0.828278	-0.415032	-0.86379	1	1
Dnpep	7.95576	13.8442	19.927	15.9097	7.39474	4.92468	4.39808	5.47777	0.79921	1.32465	0.999835	-0.1055	-0.69197	-0.855126	-0.538411	1	1
Farsb	42.1653	116.74	123.598	76.1085	51.8579	45.2002	43.8017	46.6172	1.46917	1.55153	0.852001	0.298508	0.100273	0.0549306	0.144806	1	1
Cul3	77.3215	451.258	663.231	300.808	218.779	266.958	197.513	128.048	2.54501	3.10057	1.9599	1.50053	1.78767	1.35301	0.727743	1	1
Ilkap	50.5754	81.3192	104.071	68.5563	69.1772	75.1573	60.9765	53.8631	0.68516	1.04106	0.438853	0.451861	0.571477	0.269818	0.0908614	1	1
Dtymk	5.62946	23.5431	33.3775	13.6365	7.18305	5.46347	4.25941	4.87234	2.06424	2.56781	1.2764	0.3516	-0.043179	-0.402343	-0.208382	1	1
Tsn	17.4229	44.4575	47.5389	34.9857	19.2088	16.2266	16.7371	12.5576	1.35144	1.44812	1.00578	0.140783	-0.102624	-0.0579352	-0.472424	1	1
Actr3	48.2933	87.0865	97.2764	55.1603	53.0122	62.3297	77.3323	72.7431	0.850626	1.01027	0.191807	0.134501	0.368097	0.679248	0.590987	1	1
Srgap2	7.0005	11.6446	20.6472	13.4515	9.39453	10.1198	10.1754	8.5467	0.734131	1.56042	0.942237	0.424363	0.531651	0.539556	0.28791	1	1
Snrpe	35.1172	63.7628	98.4144	70.9627	50.1673	42.727	30.2572	30.3312	0.860537	1.48669	1.01488	0.514569	0.28297	-0.214899	-0.211375	1	1
Prdx6	20.4173	54.0127	68.6164	57.8805	39.4286	39.3983	35.8861	29.7835	1.40351	1.74876	1.50329	0.94945	0.948341	0.813633	0.544721	1	1
Ndufs2	14.4919	37.6957	71.6355	34.1027	17.9342	13.3187	8.67427	9.22253	1.37915	2.30543	1.23464	0.307467	-0.121793	-0.740433	-0.652012	1	1
Adss	13.0228	41.5539	43.3214	25.9902	14.0548	11.4697	9.05882	10.7566	1.67394	1.73404	0.996928	0.110023	-0.183212	-0.523645	-0.275818	1	1
Hnrnpu	5.0507	6.62154	10.8501	10.5438	5.80815	5.38168	4.68746	4.86939	0.390683	1.10315	1.06184	0.201595	0.0915733	-0.107677	-0.0527423	1	1
Mosc2	9.28204	10.7965	20.7227	19.7526	12.3012	11.0658	10.1639	8.85758	0.21805	1.1587	1.08953	0.406285	0.253594	0.13094	-0.0675293	1	1
Iars2	26.9674	98.4582	152.422	89.6764	55.7435	53.1408	34.8815	22.4468	1.86829	2.49878	1.73351	1.04759	0.978604	0.371246	-0.264707	1	1
Smyd2	4.14986	2.82834	18.9862	13.2965	7.47133	7.95978	6.35723	5.32158	-0.553107	2.19382	1.67991	0.848302	0.939666	0.615336	0.358792	1	1
Reps1	3.79562	54.8455	57.836	21.9644	12.586	11.1188	6.10112	4.08334	3.85297	3.92956	2.53276	1.72941	1.55059	0.684739	0.105414	1	1
Ifngr1	30.0743	38.9299	80.2762	79.5893	50.1303	45.8967	33.1271	29.0885	0.372347	1.41644	1.40404	0.737152	0.609859	0.139481	-0.0480823	1	1
Stx7	8.71535	13.0047	22.6465	14.027	11.5474	11.9075	10.7039	9.12451	0.577403	1.37766	0.686576	0.405938	0.45024	0.296506	0.0661885	1	1
Prep	16.6073	25.9816	41.6297	25.5554	23.7811	23.5583	16.6516	10.9787	0.645673	1.3258	0.621811	0.517998	0.504418	0.00384327	-0.59711	1	1
P4ha1	14.3532	62.8504	85.155	51.8037	25.6711	15.9979	8.75534	9.82896	2.13055	2.56872	1.85168	0.838773	0.15651	-0.713137	-0.546262	1	1
Psap	13.3907	57.8079	185.653	34.7316	18.1145	18.9555	13.8602	10.7082	2.11004	3.79331	1.37502	0.435914	0.501385	0.0497167	-0.322515	1	1
Adora2a	39.9152	162.565	297.234	114.008	124.294	142.759	88.2247	48.2193	2.02601	2.89659	1.51412	1.63875	1.83857	1.14424	0.272672	1	1
Ilvbl	45.7496	121.592	135.032	67.9488	64.7596	64.4017	60.4843	55.8448	1.41022	1.56147	0.570689	0.501335	0.49334	0.402802	0.287664	1	1
Stk11	44.3504	64.1954	108.285	82.9397	63.0041	59.396	60.8903	51.1592	0.533523	1.28781	0.903116	0.506499	0.421419	0.457265	0.206047	1	1
Ndufs7	6.9567	35.4218	41.6768	25.9992	15.4772	14.0262	8.88155	6.7215	2.34816	2.58277	1.90199	1.15367	1.01165	0.352408	-0.0496199	1	1
Rps15	7.42258	12.0817	29.0445	16.3832	11.5348	8.2897	5.51979	5.97659	0.702831	1.96827	1.14222	0.636	0.159399	-0.427307	-0.312598	1	1
Dot1l	9.18993	13.9354	24.7925	19.6076	13.3652	9.76761	8.46461	8.77267	0.600629	1.43178	1.09329	0.540356	0.0879517	-0.11861	-0.0670379	1	1
Gadd45b	7.7137	12.9536	18.1771	16.1932	8.78997	6.40633	4.57602	5.78218	0.747858	1.23663	1.06989	0.188435	-0.267925	-0.75333	-0.41581	1	1
Tdg	17.4103	12.3547	37.2446	33.0632	19.7525	18.9998	24.6588	18.6871	-0.494881	1.09709	0.925285	0.182094	0.126043	0.502162	0.102102	1	1
Fbxo7	18.3244	17.5687	37.5229	24.7474	19.8239	15.6241	11.894	12.3479	-0.0607585	1.03401	0.433511	0.113475	-0.229993	-0.623532	-0.5695	1	1
Lta4h	7.27137	13.767	15.0965	9.76753	8.4395	8.38217	7.62697	8.0491	0.920915	1.05391	0.425767	0.21493	0.205097	0.0688828	0.1466	1	1
Phlda1	23.5087	31.7368	51.2589	39.6006	32.4236	30.7396	26.5979	23.7316	0.432962	1.12461	0.752328	0.46385	0.386904	0.178118	0.0136146	1	1
Ddit3	42.2816	54.4329	85.1643	42.8188	39.9251	40.8347	26.5326	25.6532	0.364449	1.01022	0.0182144	-0.082734	-0.0502343	-0.672264	-0.720891	1	1
Baz2a	5.58257	11.1451	11.7926	8.1911	5.8924	7.48489	6.87547	6.69118	0.997408	1.07888	0.553128	0.0779259	0.423052	0.300529	0.261331	1	1
Mmp19	24.7504	52.495	53.9142	28.2487	20.7508	21.243	20.8715	20.733	1.08473	1.12321	0.190733	-0.254285	-0.220464	-0.245918	-0.255523	1	1
Stx11	8.23544	11.7567	17.8777	16.4908	13.7907	12.711	10.2021	7.69721	0.513566	1.11824	1.00174	0.743778	0.62616	0.308949	-0.0975101	1	1
Vta1	8.21491	56.8265	254.576	81.8229	60.6319	55.1043	21.6856	12.9787	2.79025	4.95371	3.31619	2.88376	2.74585	1.40042	0.659829	1	1
Tnfaip3	68.0379	1005.67	1369.07	355.003	236.366	187.269	58.4193	42.138	3.88567	4.33071	2.38342	1.79661	1.4607	-0.219894	-0.691217	1	1
Rps12	2.98974	13.5646	102.503	50.0381	15.669	10.2542	5.12096	3.7012	2.18175	5.0995	4.06494	2.38982	1.77812	0.776394	0.307973	1	1
Cdc40	17.0695	24.197	56.6595	26.2717	19.8652	23.0311	23.5601	18.3828	0.503407	1.7309	0.622089	0.218823	0.432163	0.464925	0.106936	1	1
Ccar1	34.2492	54.2572	89.9789	74.8675	53.0861	49.8496	37.1475	33.3621	0.663744	1.39352	1.12827	0.632264	0.541512	0.117195	-0.0378602	1	1
Smarcb1	49.5446	69.7919	153.246	140.287	116.654	133.725	125.506	87.6645	0.494332	1.62905	1.50158	1.23544	1.43247	1.34096	0.823265	1	1
Pias4	18.9395	58.3359	108.212	39.4198	24.2644	15.5556	13.2882	13.0939	1.62299	2.51439	1.05752	0.357443	-0.283964	-0.511253	-0.532503	1	1
Fzr1	52.1269	141.348	177.321	95.9762	65.3005	65.8957	57.9058	52.8577	1.43915	1.76626	0.880649	0.325066	0.338156	0.15168	0.0200856	1	1
Hsp90b1	20.9616	42.4239	50.4536	26.9103	24.3135	21.9245	19.0056	20.5357	1.01713	1.26721	0.36041	0.214009	0.0647951	-0.141324	-0.0296147	1	1
Metap2	14.5729	185.34	212.411	89.4889	43.8529	36.2223	23.7988	14.0114	3.66881	3.8655	2.61842	1.58938	1.31359	0.707601	-0.0566869	1	1
Plxnc1	115.316	1030.39	1208.87	525.642	308.938	241.449	133.796	96.0441	3.15953	3.38999	2.18849	1.42172	1.06613	0.214442	-0.263824	1	1
Tbk1	6.95153	15.5555	15.7035	10.967	6.6176	5.77302	5.28044	5.43705	1.16202	1.17568	0.657766	-0.0710225	-0.268004	-0.396672	-0.354506	1	1
Pip4k2c	5.60943	10.3686	24.2867	14.5293	7.04617	5.70463	8.42561	7.3426	0.886295	2.11424	1.37304	0.328985	0.0242791	0.586927	0.388437	1	1
Obfc2b	23.3739	19.5052	52.534	27.9094	25.1495	21.4285	16.2142	15.2901	-0.26104	1.16835	0.255853	0.105631	-0.125368	-0.527641	-0.612301	1	1
Osm	18.9594	131.779	156.093	53.6832	27.0629	20.0053	12.5892	12.0965	2.79714	3.04142	1.50156	0.513403	0.077469	-0.590727	-0.648324	1	1
Ogdh	8.01441	11.0761	29.0753	21.3679	17.8248	17.0717	10.3243	9.39834	0.466782	1.85913	1.41478	1.15322	1.09094	0.365376	0.22981	1	1
Ikzf1	9.51199	13.844	20.0475	13.4618	11.2648	11.456	10.8844	8.95705	0.541442	1.0756	0.501052	0.244003	0.268284	0.194443	-0.0867235	1	1
Sh3pxd2b	7.75215	12.3801	24.4818	11.8134	8.49335	8.31616	9.32778	7.99662	0.675355	1.65904	0.607756	0.131737	0.101321	0.266937	0.0447938	1	1
Fbxw11	7.8644	9.42519	17.1066	15.4566	11.3633	12.1352	12.5714	8.31649	0.261185	1.12114	0.974814	0.530973	0.625789	0.676737	0.0806381	1	1
P4ha2	12.142	21.974	68.4961	51.4484	23.3716	18.3282	15.6546	12.261	0.855791	2.49602	2.08312	0.94475	0.594059	0.366581	0.0140706	1	1
Pmp22	5.99036	12.3339	17.7507	8.56333	3.99999	3.28991	3.1797	4.20995	1.04191	1.56716	0.515529	-0.582646	-0.864595	-0.913752	-0.50884	1	1
Rpl26	14.5784	20.809	33.6561	32.7742	24.026	21.5249	19.0243	15.6707	0.513375	1.20704	1.16873	0.720764	0.562174	0.384011	0.104237	1	1
Vamp2	4.94988	25.4652	26.4833	14.552	15.3373	13.9254	6.84112	4.8104	2.36306	2.41962	1.55575	1.63158	1.49225	0.466839	-0.0412367	1	1
Gabarap	33.721	51.344	86.717	71.3187	47.3809	44.232	38.5334	33.2157	0.606548	1.36267	1.08063	0.490658	0.391443	0.192462	-0.021782	1	1
Mis12	7.59745	145.979	232.736	119.232	98.7255	118.956	63.8899	27.4293	4.2641	4.93704	3.97211	3.69984	3.96877	3.072	1.85213	1	1
Mybbp1a	7.09164	49.2678	71.279	24.5598	23.3604	25.0339	16.2517	12.8625	2.79645	3.32929	1.79211	1.71987	1.81969	1.1964	0.85898	1	1
Phf12	5.18629	8.76801	14.9169	11.7484	7.46682	7.01637	6.78019	5.12226	0.757547	1.52417	1.17969	0.525791	0.436022	0.386623	-0.0179224	1	1
Unc119	0.91394	18.6402	29.3269	5.9731	3.72199	3.85196	3.4777	2.24472	4.35017	5.00398	2.70831	2.0259	2.07542	1.92796	1.29636	1	1
Psmd11	0.340517	40.5673	44.9787	7.56933	6.43256	8.38478	2.42618	1.13699	6.89645	7.04537	4.47437	4.23959	4.62197	2.83289	1.73942	1	1
Supt4h1	2.49729	18.105	22.0348	10.2382	3.63085	4.42657	2.82226	2.24602	2.85795	3.14135	2.03553	0.539944	0.825826	0.176488	-0.152993	1	1
Trim25	14.399	30.8906	32.0026	23.6982	14.9538	14.2908	12.8346	13.8821	1.1012	1.15222	0.718809	0.0545435	-0.0108819	-0.16593	-0.0527428	1	1
Mrpl27	2.04288	8.61614	17.0753	14.0184	6.10103	6.94925	4.77815	2.87945	2.07644	3.06323	2.77865	1.57845	1.76625	1.22585	0.495189	1	1
Snf8	1.69032	13.4955	13.881	7.19376	3.3653	3.14136	3.26283	3.40472	2.99711	3.03774	2.08945	0.993439	0.894093	0.948827	1.01024	1	1
Mrpl10	1.65126	62.7009	102.7	33.0604	16.2863	11.1973	2.59061	1.34947	5.24685	5.95873	4.32346	3.30202	2.76151	0.649725	-0.291174	1	1
Atp6v0a1	609.311	305.14	295.482	301.525	359.915	342.558	351.187	362.768	-0.997707	-1.04411	-1.0149	-0.759523	-0.830831	-0.794939	-0.748132	1	1
Fmnl1	14.0071	8.9374	6.83213	7.14989	8.71841	9.73913	10.2877	11.4767	-0.648231	-1.03575	-0.970165	-0.684021	-0.524293	-0.445238	-0.28745	1	1
Arf2	24.7228	14.2805	10.2437	21.2321	35.3057	33.1651	20.0995	17.5863	-0.791796	-1.27111	-0.219595	0.514059	0.423824	-0.298683	-0.49139	1	1
Dcaf7	20.1063	10.8071	8.6815	11.4387	12.9565	11.8925	12.2674	12.1931	-0.895668	-1.21163	-0.813725	-0.633972	-0.757596	-0.712818	-0.721583	1	1
Slc9a3r1	59.0567	20.6122	14.2887	43.8776	65.2079	60.0091	52.9342	54.9321	-1.5186	-2.04723	-0.428616	0.142946	0.0230805	-0.157901	-0.104451	1	1
Chmp6	10.9642	6.37349	5.44118	6.03359	13.3449	20.4406	17.6323	14.5231	-0.782645	-1.01081	-0.861712	0.283488	0.898637	0.68542	0.405549	1	1
Aspscr1	34.2126	18.6572	16.8768	20.3469	25.5989	25.7618	25.1883	23.5777	-0.874795	-1.01949	-0.749719	-0.418446	-0.409294	-0.441774	-0.537105	1	1
Sec61g	16.1552	7.72088	4.5364	6.14985	9.43404	9.03474	14.5824	15.3757	-1.06516	-1.83238	-1.39338	-0.776051	-0.838444	-0.14777	-0.0713465	1	1
Aftph	17.4724	11.4851	6.53402	7.29289	8.40282	7.96864	12.8721	16.7339	-0.605314	-1.41904	-1.26052	-1.05613	-1.13267	-0.44083	-0.0623041	1	1
Kdm6b	14.1997	10.8312	5.35608	5.91267	11.0127	14.4503	9.224	8.50305	-0.390667	-1.40661	-1.26398	-0.366692	0.025239	-0.622396	-0.739808	1	1
Cpd	52.2261	32.7551	20.5891	27.4355	35.375	36.5275	42.6897	42.4514	-0.673051	-1.34289	-0.928727	-0.562041	-0.515788	-0.290883	-0.298959	1	1
Ccl9	25.5233	14.3889	12.0118	16.3523	20.5592	19.0238	22.2041	25.1975	-0.826859	-1.08736	-0.642321	-0.312031	-0.424009	-0.200989	-0.0185343	1	1
Med13	11.6714	7.95718	5.39082	5.76783	7.64938	8.47144	11.5775	12.3844	-0.552648	-1.1144	-1.01688	-0.609563	-0.462298	-0.0116539	0.0855463	1	1
Utp18	31.436	13.9348	13.7248	16.2618	19.4292	20.6535	22.1994	22.0066	-1.17373	-1.19563	-0.950931	-0.694191	-0.606031	-0.501897	-0.514481	1	1
Ezh1	17.7386	14.3813	8.37121	10.4581	10.7441	10.4101	14.1092	17.9074	-0.302698	-1.08338	-0.762271	-0.723348	-0.768908	-0.330256	0.0136637	1	1
Ubtf	36.2924	29.402	18.021	31.3863	43.8853	52.935	48.5275	45.4574	-0.303753	-1.00999	-0.209532	0.27407	0.544554	0.419135	0.324848	1	1
Itga2b	37.0475	21.3186	17.213	17.7474	34.5993	48.0571	51.4947	45.4491	-0.797263	-1.10588	-1.06177	-0.0986333	0.375373	0.475048	0.294876	1	1
Eftud2	10.1914	4.68838	3.6256	6.89075	11.0366	14.7343	14.1866	11.585	-1.12019	-1.49106	-0.564619	0.114944	0.531826	0.477177	0.184906	1	1
Ddx5	9.44338	10.451	4.50848	9.39707	12.4135	14.3476	13.7657	12.6874	0.146266	-1.06666	-0.00709233	0.394535	0.603434	0.543703	0.426021	1	1
Wipi1	34.6458	19.2318	12.5761	13.0161	16.6668	16.0835	19.9795	25.8804	-0.849187	-1.462	-1.41238	-1.0557	-1.1071	-0.79416	-0.420821	1	1
Cd300ld	20.1213	10.1719	9.99643	10.809	11.299	11.774	14.3129	15.6329	-0.984134	-1.00924	-0.89649	-0.832528	-0.773119	-0.491408	-0.364138	1	1
Cd300lf	35.1526	20.7941	15.6976	17.2763	22.7719	23.5557	32.2638	36.0116	-0.757457	-1.16309	-1.02484	-0.626377	-0.577555	-0.123715	0.0348303	1	1
Lgals3bp	14.115	6.41796	5.34654	6.28595	7.04963	7.92735	12.4012	14.3374	-1.13704	-1.40055	-1.16703	-1.00161	-0.832319	-0.186749	0.0225543	1	1
Stra13	21.7221	12.3814	9.7135	15.2729	31.8661	41.881	41.2184	30.2315	-0.810989	-1.1611	-0.50819	0.552859	0.947132	0.924125	0.476889	1	1
Cpsf3	9.87846	6.10126	4.75232	5.12956	5.73421	7.26845	12.5268	14.8404	-0.695179	-1.05565	-0.945451	-0.784691	-0.442638	0.34266	0.587172	1	1
Wdr89	10.2499	4.12356	7.8108	21.2462	14.1477	9.83896	7.34608	6.78021	-1.31365	-0.392068	1.05159	0.464958	-0.0590321	-0.480563	-0.596208	2	2
Lypla1	9.23264	2.98335	10.5889	19.8552	17.3415	13.9464	11.0706	10.6966	-1.62981	0.197738	1.1047	0.909414	0.595078	0.261918	0.212337	2	2
Rpl37a	15.5858	50.9827	63.2016	67.6002	52.111	44.6554	30.9308	14.4165	1.70978	2.01973	2.1168	1.74136	1.5186	0.988812	-0.112511	2	2
Arpc2	21.1818	27.3431	37.0115	50.6256	36.2321	30.4666	24.1828	21.5514	0.368352	0.805148	1.25704	0.774443	0.524403	0.191156	0.0249564	2	2
Cops8	84.2947	87.2178	146.604	219.026	204.923	187.483	154.527	109.878	0.0491807	0.798411	1.37759	1.28157	1.15325	0.874345	0.382389	2	2
Adipor1	19.6382	36.4886	35.9733	45.8515	42.404	34.6398	24.137	16.7513	0.893783	0.873264	1.22331	1.11054	0.818768	0.297584	-0.22939	2	2
Kif21b	164.5	266.837	332.856	353.353	218.624	185.531	183.329	175.192	0.697871	1.01681	1.10302	0.410364	0.173573	0.156347	0.0908493	2	2
Ncf2	35.0988	17.6317	44.3503	82.3238	72.4252	63.6452	54.2785	44.6986	-0.99325	0.337522	1.22989	1.04507	0.85863	0.628959	0.348808	2	2
Rgs16	14.7709	31.2445	61.0322	84.8322	63.4552	53.0223	33.3022	20.9123	1.08084	2.04681	2.52185	2.10298	1.84384	1.17286	0.501594	2	2
Acbd6	15.5063	8.36127	22.4401	37.4417	33.5364	25.8729	26.5029	23.3447	-0.89106	0.533225	1.27179	1.11287	0.738587	0.773296	0.590241	2	2
Vamp4	7.99405	13.5376	10.6481	19.469	10.308	7.29959	6.48996	7.50501	0.759973	0.413598	1.28418	0.366766	-0.131111	-0.300717	-0.0910726	2	2
Fcgr4	7.87415	5.7255	9.59637	15.8845	10.517	6.96913	6.92821	7.63981	-0.459723	0.285365	1.01242	0.417527	-0.176146	-0.184642	-0.0435874	2	2
Usf1	7.21422	9.79442	15.7126	16.6484	12.8605	14.06	9.99035	7.31299	0.441117	1.12301	1.20647	0.834031	0.962681	0.469692	0.019618	2	2
Cd84	24.9358	51.4514	64.5297	66.5289	50.1513	52.6161	38.6432	29.3368	1.04499	1.37174	1.41576	1.00807	1.07729	0.631996	0.234493	2	2
Pex19	37.9158	45.1122	118.289	120.756	107.607	92.1987	52.5587	47.9294	0.250718	1.64144	1.67122	1.5049	1.28195	0.47113	0.338112	2	2
Aim2	10.0711	11.9757	21.0443	23.9201	13.9229	16.2347	20.2653	14.2153	0.249889	1.06321	1.248	0.467238	0.688859	1.00879	0.497223	2	2
Srp9	19.5774	25.0379	40.2567	44.9328	28.7391	22.3185	26.9389	16.2364	0.354924	1.04004	1.19858	0.553826	0.189051	0.460502	-0.269957	2	2
Bpnt1	11.412	9.98818	18.5099	47.0015	32.5003	23.3862	19.0499	12.0072	-0.192258	0.697745	2.04216	1.5099	1.03511	0.739232	0.0733481	2	2
Eprs	25.5756	24.1566	43.911	64.7318	42.1905	40.5143	37.2655	29.2429	-0.0823507	0.779814	1.33971	0.72215	0.663663	0.543073	0.193318	2	2
Rpl7	15.1334	11.7309	17.8636	32.7841	28.1914	22.1156	17.5817	15.8114	-0.367422	0.239287	1.11526	0.897519	0.547328	0.216338	0.063229	2	2
Uggt1	65.8766	89.4445	321.861	411.033	322.531	248.875	135.984	80.0949	0.441227	2.2886	2.64142	2.2916	1.91758	1.0456	0.281944	2	2
Uxs1	302.816	324.378	609.555	852.299	568.549	519.878	509.876	383.368	0.0992345	1.00931	1.49292	0.908843	0.779732	0.751705	0.340288	2	2
Nab1	7.42606	10.7441	13.5713	15.9281	11.3016	8.83787	8.03872	6.8031	0.532876	0.86989	1.10091	0.605858	0.251102	0.114369	-0.126405	2	2
Stk17b	5.41362	5.38599	10.4906	11.3808	6.88266	6.37038	6.48247	5.41747	-0.00738207	0.954432	1.07194	0.346373	0.234786	0.25995	0.00102564	2	2
C130026I21Rik	9.47376	14.3028	22.9528	25.7333	16.9724	13.5096	8.65779	8.72159	0.594289	1.27666	1.44163	0.841182	0.511976	-0.129938	-0.119346	2	2
Ndufa10	23.2573	21.8031	33.4402	49.6969	34.0781	26.5368	22.3499	21.3124	-0.0931503	0.5239	1.09547	0.551161	0.190311	-0.0574152	-0.125991	2	2
Hdlbp	15.1278	31.0856	128.054	196.763	96.426	74.1095	80.7111	53.7353	1.03904	3.08148	3.70118	2.67222	2.29246	2.41556	1.82867	2	2
Vps4b	8.68558	10.0493	16.4597	23.1064	18.3699	19.3375	16.5469	11.6495	0.210401	0.922244	1.4116	1.08065	1.15471	0.929867	0.423574	2	2
Dbi	14.4098	11.6087	39.3474	41.9991	31.5911	30.8938	28.138	20.0668	-0.311844	1.44922	1.54331	1.13247	1.10027	0.965469	0.47776	2	2
Cdk18	11.7635	10.3339	17.1842	28.6613	17.0538	15.2503	14.3891	11.153	-0.186933	0.546765	1.28479	0.535776	0.37452	0.290659	-0.0768855	2	2
Btg2	16.3075	9.68772	15.8386	33.0735	25.4481	22.6886	21.9563	18.0959	-0.751307	-0.0420908	1.02014	0.642022	0.476432	0.429099	0.150127	2	2
Timm17a	53.4524	93.6461	106.705	107.849	95.8618	100.116	95.7006	70.5706	0.808964	0.997301	1.01269	0.842701	0.905346	0.840273	0.400813	2	2
Tor1aip1	14.0453	15.5816	19.7866	33.781	24.5476	22.8639	23.7529	16.1795	0.149756	0.494436	1.26612	0.805495	0.702984	0.758016	0.20408	2	2
Uck2	7.35858	4.96272	7.35991	24.0592	17.0848	12.4015	10.3865	9.82753	-0.568296	0.000260731	1.70909	1.21521	0.753015	0.49721	0.417401	2	2
Pea15a	23.332	33.2584	42.612	50.9591	30.2998	26.1904	34.1292	27.2727	0.511409	0.86895	1.12703	0.376998	0.166728	0.548697	0.225148	2	2
Fh1	6.09177	10.3952	11.1817	12.51	7.35727	6.00408	5.97677	4.87231	0.770984	0.876206	1.03815	0.272309	-0.0209183	-0.0274954	-0.322256	2	2
Wdr26	5.25101	6.91333	9.61003	12.0515	10.1454	10.2708	8.1215	6.99337	0.396786	0.871946	1.19855	0.950159	0.967882	0.629151	0.413393	2	2
Sf3b5	14.3702	7.77782	15.3812	29.9059	22.2893	21.5687	17.935	13.6126	-0.885642	0.0980879	1.05735	0.633271	0.585859	0.319698	-0.0781375	2	2
Ranbp2	22.4772	19.7813	57.4437	61.9367	54.1699	57.4312	49.2522	36.7604	-0.184325	1.35369	1.46233	1.26903	1.35337	1.13173	0.70969	2	2
Ppa1	30.7435	18.7718	71.5095	105.621	63.4744	56.6229	35.4168	28.1173	-0.711714	1.21785	1.78054	1.04589	0.881104	0.204152	-0.128823	2	2
Sumo3	13.7272	11.4475	22.2428	47.4866	39.5672	40.6903	29.8078	20.7777	-0.262005	0.696301	1.79048	1.52727	1.56765	1.11865	0.597999	2	2
Cirbp	20.893	15.639	24.1407	44.6152	38.3867	40.3893	39.2539	25.7089	-0.417871	0.208448	1.09452	0.877587	0.950953	0.909816	0.299248	2	2
Dazap1	37.9932	43.9524	70.1315	78.2149	52.6013	45.4386	40.9399	36.169	0.210201	0.884321	1.0417	0.469357	0.258177	0.107766	-0.0709875	2	2
Sf3a2	39.0692	37.1952	70.4289	83.7509	61.9507	62.2882	47.6136	37.003	-0.0709153	0.850136	1.10007	0.665089	0.672927	0.285342	-0.0783895	2	2
Map2k2	66.952	65.7462	155.353	212.527	158.103	137.158	103.787	81.6935	-0.0262196	1.21435	1.66645	1.23967	1.03464	0.632427	0.287094	2	2
Gnptab	23.8198	26.0371	36.8835	51.795	43.5479	35.9965	22.7651	19.8748	0.128407	0.630814	1.12065	0.870442	0.595695	-0.0653375	-0.261221	2	2
Eea1	9.634	17.7534	40.4964	48.855	28.2592	26.8795	18.5809	11.6482	0.881889	2.07159	2.3423	1.55251	1.4803	0.947614	0.2739	2	2
Ccdc59	8.13526	10.0439	14.7778	16.4304	12.6786	12.7227	15.4251	12.327	0.304059	0.861171	1.01411	0.640135	0.645145	0.923019	0.599561	2	2
Naca	13.0026	8.85222	16.6866	40.6711	32.0752	31.1542	33.7271	26.9055	-0.554689	0.35989	1.6452	1.30266	1.26063	1.37511	1.0491	2	2
Cnpy2	7.2946	10.9427	13.393	15.6484	11.4213	10.6725	8.329	8.51	0.585068	0.876578	1.10111	0.646826	0.548997	0.191314	0.22233	2	2
Ankrd52	42.5386	91.0679	84.5135	92.6469	79.578	77.1906	65.7643	56.7042	1.09817	0.990409	1.12297	0.903597	0.859653	0.628532	0.414683	2	2
Smarcc2	18.66	17.964	41.1663	47.0469	38.359	45.9525	45.7398	32.733	-0.0548404	1.14151	1.33415	1.03962	1.30019	1.2935	0.810797	2	2
Wibg	25.4589	25.9708	37.5984	56.3048	38.3169	33.0965	31.1645	25.2252	0.0287204	0.562501	1.14509	0.589811	0.378509	0.291733	-0.0133044	2	2
Ncoa7	131.171	247.741	364.358	409.619	303.643	259.893	186.895	168.136	0.917384	1.47391	1.64283	1.21093	0.986469	0.510779	0.35818	2	2
Dse	88.4723	90.3949	188.886	204.444	156.826	146.672	122.847	74.8678	0.0310156	1.09422	1.20841	0.825867	0.729296	0.473565	-0.24088	2	2
Eif4ebp2	9.28216	7.31775	19.1723	23.6151	17.7408	14.3481	10.2254	9.88649	-0.34306	1.04649	1.34718	0.934539	0.628327	0.139625	0.0909978	2	2
Ddx21	23.9512	26.7374	41.6942	56.5909	43.3472	34.0378	28.0907	24.6313	0.158761	0.799749	1.24047	0.855841	0.50704	0.229995	0.0403948	2	2
Nrbf2	94.0509	47.6283	132.572	218.075	183.037	154.223	128.968	101.598	-0.981623	0.495262	1.21331	0.960622	0.713504	0.455499	0.111358	2	2
Pfkl	9.90301	12.2502	19.5348	23.0991	15.4928	12.335	10.6302	10.123	0.306866	0.980107	1.2219	0.645659	0.316819	0.10223	0.0316979	2	2
D10Jhu81e	28.5837	27.2163	35.1814	57.3063	41.2577	34.1961	30.6931	30.2071	-0.0707217	0.29962	1.0035	0.529471	0.258639	0.102722	0.079695	2	2
ORF61	28.2035	17.9426	60.54	119.683	78.5161	64.9511	45.0664	31.6821	-0.652485	1.10201	2.08527	1.47711	1.20348	0.676178	0.167794	2	2
Polr2e	26.3628	28.7701	43.459	55.3924	36.1011	33.2067	33.2925	27.6158	0.126067	0.721151	1.07118	0.453539	0.332971	0.336694	0.0669903	2	2
Lsm7	53.4373	81.8815	300.855	437.269	396.535	407.447	250.795	126.01	0.61569	2.49315	3.0326	2.89153	2.93069	2.23059	1.23762	2	2
Sgta	33.9172	34.1969	90.8179	118.171	61.2744	62.9442	85.5794	67.9721	0.0118485	1.42096	1.80079	0.853267	0.892056	1.33525	1.00293	2	2
Ncln	17.1564	13.1427	32.8304	41.0803	26.4702	24.3734	24.7654	23.6426	-0.384485	0.936285	1.2597	0.625622	0.506561	0.529579	0.462642	2	2
Slc25a3	9.62127	21.3121	38.9479	51.518	50.8429	51.4715	42.7203	30.7477	1.14737	2.01725	2.42078	2.40175	2.41947	2.15062	1.67618	2	2
Mdm2	41.687	34.6264	56.6641	102.748	74.5372	61.6862	42.9489	36.4293	-0.267725	0.442837	1.30144	0.838363	0.56535	0.0430236	-0.194498	2	2
Rap1b	32.4961	32.6517	60.5151	66.1359	54.0948	52.5338	41.931	37.8457	0.00689152	0.897029	1.02517	0.735223	0.692979	0.367751	0.219863	2	2
Cand1	23.774	12.3779	32.029	55.8271	46.1585	32.5091	19.3459	14.8535	-0.941618	0.429994	1.23158	0.957212	0.451459	-0.297357	-0.678582	2	2
Dtx3	10.1027	6.85572	31.9781	33.8522	21.4154	18.1793	14.4027	11.6634	-0.559361	1.66234	1.74451	1.08391	0.847556	0.511598	0.207247	2	2
Myl6	20.3823	22.2502	34.8429	47.4241	33.3233	30.0344	28.0719	20.6479	0.126501	0.773548	1.2183	0.709214	0.559299	0.46181	0.0186782	2	2
Ap1b1	6.12714	7.3698	12.602	13.4865	9.14718	9.40527	9.19521	6.61775	0.266412	1.04037	1.13823	0.578113	0.618256	0.585669	0.111127	2	2
Ykt6	42.0062	45.6283	111.648	141.183	135.55	98.1259	71.7109	72.4616	0.119327	1.41028	1.74889	1.69015	1.22403	0.77159	0.786614	2	2
Wdr92	23.0724	21.2052	49.9658	54.2834	42.8743	43.9191	35.6731	31.5594	-0.12175	1.11477	1.23434	0.893945	0.92868	0.628669	0.451902	2	2
Cct4	12.7568	19.5225	37.6123	43.4002	32.3657	31.1476	23.4561	18.1769	0.613871	1.55994	1.76644	1.3432	1.28785	0.878697	0.51084	2	2
Cpeb4	14.3785	15.7669	19.4426	30.9159	14.8376	12.8121	12.2618	11.4002	0.132986	0.435308	1.10444	0.0453446	-0.166406	-0.229742	-0.334854	2	2
Mrpl22	4.90294	4.42095	12.0135	13.8962	10.0509	7.37399	6.30133	5.12516	-0.149291	1.29294	1.50297	1.03561	0.588798	0.362009	0.0639499	2	2
Drg2	49.8403	36.0518	142.475	179.181	156.825	146.156	132.416	95.6608	-0.467241	1.51532	1.84603	1.65377	1.55212	1.40969	0.940615	2	2
Pik3r5	184.078	205.659	377.661	451.314	439.576	421.281	421.977	360.684	0.159937	1.03677	1.29381	1.2558	1.19447	1.19685	0.970418	2	2
Arrb2	41.7077	45.1474	89.5135	103.585	68.5963	69.808	66.0354	50.0499	0.114329	1.10179	1.31243	0.717817	0.743079	0.662926	0.263053	2	2
Rabep1	12.9062	9.8311	24.0277	34.6119	19.3959	15.5306	13.9389	11.9984	-0.39264	0.896634	1.4232	0.587687	0.267049	0.111052	-0.105222	2	2
Flot2	2.52977	2.11082	7.76279	11.0918	10.9506	8.53077	3.35483	1.53106	-0.261203	1.61757	2.13242	2.11393	1.75367	0.407233	-0.724475	2	2
Nbr1	29.0357	22.7022	20.4171	11.8194	13.1863	15.427	23.3457	28.1586	-0.354996	-0.50805	-1.29667	-1.13879	-0.91237	-0.314671	-0.0442522	2	2
Dhx8	68.4196	47.5797	43.3927	31.3645	37.6043	38.0221	66.3503	85.6572	-0.524063	-0.656957	-1.12528	-0.863512	-0.847571	-0.0443067	0.324165	2	2
Ddx42	11.4612	8.70761	7.38088	5.59724	7.65387	7.74548	8.46361	10.6376	-0.396409	-0.634893	-1.03397	-0.582497	-0.565332	-0.437413	-0.107585	2	2
Prkar1a	97.3674	61.2362	73.0817	47.4283	65.1081	64.7304	74.3328	85.5309	-0.669054	-0.413929	-1.03769	-0.580602	-0.588995	-0.38944	-0.186993	2	2
Ict1	50.314	34.136	31.3824	24.5491	28.8317	30.0551	31.9278	42.8165	-0.559666	-0.681004	-1.03529	-0.803304	-0.74335	-0.656147	-0.232793	2	2
H2afv	62.188	45.2309	39.825	28.7164	35.7424	57.5472	95.436	103.827	-0.459328	-0.642962	-1.11476	-0.799	-0.11189	0.617897	0.739474	2	2
Purb	223.367	228.328	125.859	56.959	112.486	148.275	197.196	153.992	0.0316917	-0.827608	-1.97142	-0.989671	-0.591141	-0.179786	-0.536561	2	2
Actr2	30.2755	50.0045	8.88748	5.69164	10.6566	9.82766	16.428	20.6028	0.723907	-1.7683	-2.41123	-1.5064	-1.62323	-0.881994	-0.55531	2	2
Ugp2	31.1353	22.5771	19.3059	13.3245	21.8209	26.9888	35.3675	36.7706	-0.463691	-0.689509	-1.22447	-0.512841	-0.20619	0.183873	0.240002	2	2
Mdh1	21.8082	10.723	10.6776	10.6747	12.6986	12.8216	12.2569	19.4793	-1.02416	-1.03028	-1.03068	-0.780201	-0.766294	-0.831277	-0.162929	2	2
B3gnt2	74.1793	43.6776	53.6956	31.8339	36.4238	50.9465	90.0374	77.0025	-0.764123	-0.466213	-1.22045	-1.02614	-0.542034	0.279508	0.0538886	2	2
Commd1	46.2404	21.3833	20.4174	18.1559	23.7124	22.8711	29.764	36.21	-1.11267	-1.17935	-1.34872	-0.963512	-1.01563	-0.635585	-0.352766	2	2
Rars	33.1234	21.8207	18.1536	14.5733	18.9596	21.0835	39.8388	45.7902	-0.602153	-0.867595	-1.18452	-0.804922	-0.651736	0.266323	0.467188	2	2
Ccng1	51.2129	21.4311	20.3329	19.3947	24.5409	26.0285	30.3965	42.8306	-1.2568	-1.33269	-1.40084	-1.06132	-0.976415	-0.752602	-0.257865	2	2
Rufy1	30.9572	16.2443	13.4041	11.8058	13.7016	16.0551	25.2665	26.8461	-0.930341	-1.2076	-1.39078	-1.17593	-0.947243	-0.293049	-0.205562	2	2
Flcn	17.0312	13.5584	11.65	8.14999	8.99254	8.52553	10.4695	12.119	-0.328993	-0.54785	-1.06331	-0.92138	-0.998319	-0.701988	-0.490909	2	2
Cops3	27.1272	17.6118	11.1533	9.48965	18.5005	28.4135	45.0089	35.1682	-0.623198	-1.28227	-1.51531	-0.552176	0.0668364	0.73047	0.374531	2	2
Rai12	26.4879	17.4086	14.3621	12.8098	13.3715	16.0837	31.1234	32.6099	-0.605533	-0.883067	-1.04809	-0.986172	-0.719734	0.232666	0.299977	2	2
Acadvl	36.0672	29.0601	23.4262	17.3914	21.2511	23.8827	29.061	33.6348	-0.311648	-0.622564	-1.05231	-0.76315	-0.594721	-0.311603	-0.100733	2	2
Cxcl16	28.1417	21.6609	16.8712	13.5003	14.4855	17.3487	21.5441	22.1628	-0.377616	-0.738147	-1.05972	-0.9581	-0.697882	-0.385417	-0.344569	2	2
Pfn1	7.96485	15.3343	10.6819	3.70895	4.4419	5.83577	7.37851	6.70157	0.945043	0.423449	-1.10264	-0.84247	-0.448724	-0.110318	-0.249148	2	2
Pafah1b1	26.5938	19.4643	17.2005	10.348	12.8653	15.067	21.1253	23.2893	-0.450259	-0.628639	-1.36174	-1.0476	-0.819698	-0.332118	-0.191423	2	2
Abr	12.9849	12.256	9.67696	5.82675	6.47774	7.15794	9.36629	10.6678	-0.0833467	-0.424209	-1.15607	-1.00327	-0.859219	-0.471285	-0.283572	2	2
Wsb1	9.76001	18.145	11.9844	4.41983	4.60667	5.63506	7.90665	7.57665	0.894618	0.296203	-1.14289	-1.08316	-0.792452	-0.303816	-0.365323	2	2
Utp6	20.8724	16.8913	14.1412	10.0566	13.6788	12.8562	16.2754	18.1967	-0.305316	-0.561692	-1.05345	-0.609655	-0.699132	-0.358903	-0.19792	2	2
Ccl3	25.1975	31.9581	22.5566	11.9213	18.1342	21.7597	26.4922	26.0052	0.342901	-0.159731	-1.07974	-0.474568	-0.211622	0.0722871	0.0455195	2	2
Appbp2	39.7334	30.6359	21.856	19.4904	21.4574	23.9898	40.6977	53.415	-0.375129	-0.862323	-1.02759	-0.888877	-0.727931	0.034595	0.426893	2	2
Nme2	18.1106	19.131	14.791	8.93618	17.964	28.7958	32.7807	23.0177	0.0790779	-0.292115	-1.0191	-0.0117257	0.669024	0.856012	0.345909	2	2
Abi3	26.8196	22.5933	17.1585	13.2632	14.3757	14.6624	27.3264	29.8276	-0.247393	-0.644364	-1.01586	-0.899656	-0.871166	0.0270077	0.15336	2	2
Npepps	19.3084	18.706	17.8472	9.1732	18.3996	33.1305	38.0916	25.0424	-0.0457275	-0.113531	-1.07373	-0.0695542	0.778931	0.980244	0.375144	2	2
Stac2	28.0771	49.16	31.4156	12.1672	14.4704	18.8155	23.0868	21.236	0.808091	0.162087	-1.2064	-0.956289	-0.577472	-0.282326	-0.402882	2	2
Smarce1	13.9021	8.7102	8.66163	5.62496	5.72486	6.54174	10.9979	14.5142	-0.674525	-0.682592	-1.30539	-1.27999	-1.08756	-0.338075	0.0621622	2	2
Lsm12	54.7686	46.7257	28.2498	25.4604	47.9153	56.8759	73.1958	58.0673	-0.229133	-0.955108	-1.10509	-0.192863	0.0544685	0.418412	0.084377	2	2
Plekhm1	73.0467	53.654	38.7443	31.4527	55.4604	77.4454	103.541	91.3912	-0.445133	-0.914835	-1.21564	-0.397361	0.0843605	0.503311	0.323236	2	2
Nsf	20.6187	26.2877	15.8071	8.91807	9.53181	9.86763	12.59	18.7168	0.350435	-0.383381	-1.20915	-1.11313	-1.06318	-0.711675	-0.13962	2	2
Prpsap1	21.3936	16.3969	13.7572	7.13454	9.23936	13.6511	17.5861	20.068	-0.383756	-0.636992	-1.58429	-1.21131	-0.648162	-0.282744	-0.0922824	2	2
Rhbdf2	72.6217	67.3183	21.9024	18.5818	29.2302	27.619	54.8412	72.4018	-0.109402	-1.72931	-1.96651	-1.31294	-1.39474	-0.405141	-0.00437514	2	2
Socs3	18.9104	16.6185	10.6068	6.42689	8.38756	8.1032	8.92879	12.6618	-0.18639	-0.83419	-1.55699	-1.17286	-1.22262	-1.08264	-0.578697	2	2
Eif4a3	51.7147	48.257	22.606	19.8858	28.642	37.0972	50.0304	53.7696	-0.0998362	-1.19387	-1.37884	-0.852442	-0.479264	-0.0477694	0.0562163	2	2
Pcyt2	11.8815	10.5933	6.46894	5.48266	7.54439	8.50601	16.3114	17.558	-0.165565	-0.877116	-1.11577	-0.655241	-0.482163	0.457164	0.563412	2	2
Sirt7	16.5967	12.3247	8.5513	7.6907	15.2839	16.8148	19.8659	22.9528	-0.429344	-0.956681	-1.10971	-0.118884	0.0188352	0.259398	0.467774	2	2
Mafg	19.4096	12.9376	11.3231	7.7782	11.1259	11.4573	11.9567	14.2076	-0.5852	-0.777501	-1.31926	-0.802848	-0.760503	-0.698951	-0.450108	2	2
Dcxr	12.9763	8.20826	7.20982	6.10435	7.35553	7.8177	10.4752	10.3158	-0.660731	-0.847844	-1.08797	-0.818978	-0.731063	-0.308901	-0.331023	2	2
Hs1bp3	24.1387	17.4044	12.0488	6.15373	9.85365	11.2073	17.6817	21.7272	-0.471896	-1.00246	-1.97181	-1.29262	-1.10691	-0.449091	-0.151846	2	2
Srp54c	66.5774	31.7625	14.5993	12.9773	34.0561	41.9589	53.3209	69.4132	-1.06771	-2.18913	-2.35904	-0.967119	-0.666056	-0.320331	0.0601775	2	2
Tcea1	25.4939	10.665	30.5121	56.6374	63.886	60.6278	42.3939	32.3632	-1.25727	0.259229	1.1516	1.32535	1.24983	0.733705	0.344202	3	2
Fzd7	44.0332	42.2618	50.3586	80.3741	95.0463	88.6458	71.4144	57.2121	-0.0592375	0.193646	0.868139	1.11004	1.00946	0.697623	0.377729	3	2
Arfgef1	29.1259	87.7301	57.1569	64.1201	126.608	120.182	96.3917	74.3233	1.59077	0.972625	1.13847	2.11999	2.04485	1.72661	1.35151	3	2
Rgs1	11.7148	9.71116	9.59812	36.5692	54.6627	53.4176	46.5549	41.2715	-0.270617	-0.287509	1.6423	2.22222	2.18898	1.9906	1.81681	3	2
Bclaf1	6.45208	7.4339	9.75129	18.0746	19.7029	13.408	7.48699	9.67949	0.204355	0.595829	1.48613	1.61057	1.05526	0.214622	0.585167	3	2
Sgk1	62.9889	48.722	138.916	198.99	232.479	227.002	189.58	129.887	-0.370524	1.14104	1.65953	1.88393	1.84954	1.58964	1.04409	3	2
A230046K03Rik	7.55104	4.89907	8.06797	12.5164	22.5029	21.956	18.2823	19.5464	-0.624167	0.0955304	0.729072	1.57536	1.53987	1.2757	1.37216	3	2
Snrpf	1061.38	755.693	1534.18	2116.06	2680.78	2436.13	1399.84	913.858	-0.490069	0.531526	0.995439	1.33671	1.19865	0.399321	-0.215899	3	2
Mars	36.7478	19.9002	40.3602	100.744	107.25	92.2824	88.6977	79.7248	-0.884875	0.135275	1.45496	1.54525	1.3284	1.27124	1.11737	3	2
Dbnl	149.058	155.186	433.858	683.485	805.597	738.562	614.861	395.488	0.0581246	1.54135	2.19704	2.43418	2.30885	2.04439	1.40776	3	2
Hexim1	12.9487	12.976	10.0065	8.16791	6.31961	6.76611	8.16036	10.1557	0.00303846	-0.37187	-0.664768	-1.0349	-0.936409	-0.666103	-0.350518	3	2
Plek	17.4465	10.3003	11.0216	8.6335	7.96813	10.3945	19.2246	17.3682	-0.760251	-0.662604	-1.01492	-1.13062	-0.747117	0.140016	-0.0064894	3	2
Ttc1	15.0668	17.0053	11.5527	7.85971	6.84489	6.96735	8.16954	10.9377	0.174611	-0.383143	-0.938825	-1.13827	-1.11269	-0.883046	-0.462064	3	2
Sqstm1	42.5965	58.6428	43.5922	18.2981	16.8946	19.9889	33.4282	28.1821	0.461219	0.0333351	-1.21904	-1.33417	-1.09154	-0.349669	-0.595956	3	2
Ggnbp2	18.3999	24.3921	20.4012	8.66951	7.16168	8.37026	10.2002	12.6401	0.406716	0.148956	-1.08568	-1.36133	-1.13635	-0.8511	-0.54169	3	2
Ube2z	18.6714	19.9537	15.2363	8.69753	7.4363	8.14647	18.8411	23.1718	0.0958262	-0.293318	-1.10215	-1.32817	-1.19658	0.0130531	0.31154	3	2
Unc13d	22.581	20.3593	16.7428	13.0422	10.7277	10.9903	18.6793	27.7039	-0.149421	-0.431569	-0.791922	-1.07377	-1.03888	-0.273669	0.29498	3	2
Timp2	18.3895	12.808	11.6967	11.1404	8.1992	9.13995	17.193	23.1454	-0.521837	-0.652781	-0.723081	-1.16533	-1.00862	-0.097061	0.331843	3	2
Nampt	10.9884	8.79551	5.00919	4.17102	3.85447	4.27395	9.02149	11.6467	-0.321142	-1.13333	-1.39751	-1.51138	-1.36234	-0.284544	0.0839399	3	2
Pnn	16.8865	9.58276	8.44187	7.31727	6.98631	7.7513	11.5536	16.1323	-0.817357	-1.00024	-1.20649	-1.27327	-1.12336	-0.547528	-0.0659182	3	2
Calm3	14.4707	5.97798	4.33304	8.58281	24.2028	33.1403	28.8164	22.9816	-1.2754	-1.73968	-0.753613	0.742039	1.19545	0.993755	0.667345	4	2
S100a4	6.93708	6.2859	3.465	14.0971	55.0187	71.0509	54.3692	33.9961	-0.142209	-1.00147	1.023	2.98752	3.35645	2.97039	2.29297	4	2
H2-T22	9.41779	4.19365	6.1576	14.4116	19.3483	21.5675	19.438	15.6112	-1.16718	-0.61302	0.61377	1.03875	1.1954	1.04542	0.729121	4	2
Cox5b	2.33251	1.16237	1.24059	4.07012	18.4831	25.163	15.7224	9.17453	-1.00481	-0.910857	0.803188	2.98625	3.43135	2.75287	1.97575	4	2
Ndufb3	5.06298	2.07321	2.29966	3.68125	11.7326	17.0495	14.5548	10.6269	-1.28812	-1.13857	-0.459791	1.21246	1.75167	1.52344	1.06966	4	2
Casp8	3.51042	1.46855	2.72298	22.1175	92.0289	123.228	107.521	62.0337	-1.25725	-0.366457	2.65547	4.71237	5.13354	4.93683	4.14334	4	2
Zfand2b	15.9404	36.8423	33.25	43.6825	65.8799	103.945	82.8629	47.7516	1.20868	1.06067	1.45437	2.04715	2.70506	2.37804	1.58286	4	2
Dnajb2	22.7594	32.6964	50.2477	68.3063	63.2358	77.4439	73.3133	65.6864	0.522669	1.1426	1.58556	1.47428	1.76669	1.68761	1.52913	4	2
Mrpl44	23.4877	25.9316	29.4185	56.3881	114.718	127.992	102.5	61.2023	0.142806	0.324818	1.26349	2.28811	2.44608	2.12565	1.38168	4	2
Cab39	13.0112	24.0897	21.4769	16.6411	34.2133	47.5741	26.9274	17.0041	0.888662	0.723032	0.354997	1.3948	1.87042	1.04932	0.386129	4	2
Itm2c	5.90108	6.51186	6.84859	10.2376	13.0808	16.5536	13.3218	7.4538	0.142091	0.214828	0.794827	1.1484	1.48809	1.17474	0.336997	4	2
Psmd1	7.76889	7.01258	10.0182	15.0033	19.2659	20.9138	16.4637	11.2138	-0.147763	0.366843	0.949499	1.31027	1.42867	1.08351	0.529495	4	2
Ptma	6.64233	4.3445	3.87922	6.27996	27.6657	43.5742	37.2717	24.6173	-0.612499	-0.775923	-0.080934	2.05834	2.71371	2.48832	1.88991	4	2
Cxcr7	27.6608	18.0397	16.9964	28.2794	63.7572	77.0743	56.9425	36.2769	-0.616668	-0.702614	0.0319086	1.20475	1.47841	1.04166	0.391208	4	2
Lrrfip1	22.7287	14.4119	22.7779	44.7184	52.7788	53.0092	47.707	41.9065	-0.657255	0.00311957	0.976353	1.21544	1.22173	1.06969	0.882659	4	2
Serpinb8	8.80559	10.9821	11.1582	12.8954	16.8156	20.1125	15.8212	11.4883	0.318662	0.341613	0.550365	0.933309	1.1916	0.845367	0.383674	4	2
Mki67ip	24.1774	18.1556	27.375	40.8523	76.8138	96.1093	82.6755	53.9008	-0.413244	0.1792	0.756758	1.66771	1.99102	1.7738	1.15665	4	2
Nucks1	15.1825	18.211	25.1762	20.0702	23.9843	36.4551	29.2975	19.2891	0.262401	0.729651	0.402646	0.659681	1.26371	0.948368	0.345376	4	2
Rabif	9.42362	10.3829	14.7005	16.39	17.962	19.7586	16.7169	11.7589	0.139856	0.641512	0.798463	0.930595	1.06813	0.826954	0.3194	4	2
Arpc5	7.99359	6.33198	4.91996	22.9088	105.394	137.882	129.235	89.7213	-0.336187	-0.700197	1.51899	3.72081	4.10845	4.01501	3.48854	4	2
Stx6	5.75654	6.86722	6.02158	5.09837	9.1452	13.8102	11.3989	7.79621	0.254524	0.0649402	-0.175166	0.667813	1.26246	0.985621	0.437571	4	2
Creg1	11.9193	7.95754	7.19167	9.88176	20.4041	25.9599	21.6008	19.6973	-0.582905	-0.728901	-0.27046	0.77556	1.12299	0.857785	0.724698	4	2
Igsf8	6.08702	7.48197	16.6117	27.3803	22.7689	30.1123	18.8297	11.3236	0.297682	1.44839	2.16933	1.90326	2.30654	1.6292	0.895525	4	2
Tagln2	4.77881	3.7978	4.00523	5.35604	19.205	29.362	21.3055	13.5461	-0.331487	-0.254766	0.164515	2.00676	2.61923	2.1565	1.50315	4	2
Zfp238	25.4786	24.017	31.2141	45.8423	47.5063	52.2717	37.3558	26.8882	-0.0852301	0.292912	0.847393	0.898833	1.03674	0.552046	0.0776872	4	2
Itpkb	14.2657	40.9825	84.5248	87.427	147.645	163.112	94.2217	55.7031	1.52246	2.56682	2.61553	3.37151	3.51524	2.72351	1.96521	4	2
Acbd3	5.22433	3.8937	3.11566	15.0853	95.7743	150.569	120.263	53.7521	-0.424104	-0.745708	1.52983	4.19632	4.84903	4.5248	3.363	4	2
Tceb1	13.3815	10.5494	9.89749	23.7096	87.4291	135.558	133.193	78.0393	-0.343079	-0.435105	0.825231	2.70787	3.3406	3.31521	2.54396	4	2
Ccdc115	5.98344	5.61112	7.81374	9.28401	14.0652	16.3587	12.7771	8.18821	-0.0926864	0.385038	0.633773	1.23308	1.45101	1.09451	0.452573	4	2
Actr1b	14.0579	16.4911	16.6862	18.8386	31.4438	45.4596	43.3158	29.2581	0.230307	0.247274	0.422311	1.16139	1.6932	1.62351	1.05745	4	2
Mitd1	26.297	35.5398	41.9613	56.241	87.0284	91.5583	52.5267	38.3557	0.434537	0.674161	1.09672	1.72659	1.79979	0.998153	0.544543	4	2
Sf3b1	92.7293	144.34	156.029	180.419	167.296	198.921	177.978	148.029	0.638374	0.750717	0.960254	0.851306	1.1011	0.940602	0.674783	4	2
Sumo1	22.9573	20.3675	40.5168	54.8575	58.9223	62.111	40.8784	27.46	-0.172684	0.819567	1.25674	1.35986	1.4359	0.832386	0.258379	4	2
Atg9a	53.7633	67.7673	85.7538	103.103	106.06	127.952	115.802	80.9125	0.333968	0.673579	0.939393	0.980187	1.25091	1.10697	0.589741	4	2
Dock10	29.2431	24.8525	26.9556	43.8914	59.9524	67.9061	52.6261	35.4225	-0.234705	-0.117511	0.585842	1.03572	1.21544	0.847682	0.27657	4	2
Trip12	31.2494	31.3741	29.7835	36.9174	54.6358	64.1765	54.7744	36.973	0.00574558	-0.0693152	0.240472	0.806018	1.03822	0.809673	0.242644	4	2
Arl4c	16.5513	15.3928	19.5863	25.2983	42.2963	44.0145	35.9152	30.3308	-0.104689	0.2429	0.612096	1.35359	1.41103	1.11765	0.873839	4	2
Dars	22.0376	23.0881	27.6542	33.5647	38.8286	45.1868	41.8488	29.778	0.0671823	0.327531	0.606978	0.817153	1.03593	0.925219	0.43428	4	2
Rgs2	9.82807	10.8404	8.46257	17.235	28.9323	35.3983	29.9062	23.0313	0.141438	-0.215812	0.810361	1.5577	1.8487	1.60546	1.22862	4	2
Smg7	15.0992	16.3477	33.8163	36.9995	53.8377	72.9762	70.7123	48.184	0.114616	1.16325	1.29303	1.83414	2.27295	2.22749	1.67408	4	2
Cacybp	6.04683	6.87674	5.69686	4.84969	10.7	16.5989	11.1408	7.47122	0.185546	-0.0860121	-0.318286	0.82336	1.45684	0.881602	0.305165	4	2
Uap1	7.89456	8.59792	7.86863	9.42441	13.5565	15.8814	13.2812	9.7907	0.123129	-0.00474639	0.255543	0.780054	1.00841	0.750455	0.310553	4	2
Fcer1g	12.8262	13.0012	12.5335	18.7754	25.0832	33.8959	31.1938	20.9783	0.019551	-0.0333045	0.54975	0.967628	1.40202	1.28217	0.709804	4	2
Akt3	16.0374	12.3639	9.91286	17.7772	56.3794	96.3514	96.1331	70.5829	-0.375306	-0.694067	0.148588	1.81373	2.58687	2.58359	2.13788	4	2
Atf3	9.2339	10.3594	10.2591	12.1442	16.9531	21.1612	20.8586	15.6245	0.165928	0.151892	0.395255	0.876537	1.19641	1.17563	0.758798	4	2
Ppp2r5a	4.31267	9.46053	7.5901	16.169	68.4666	89.4439	35.0834	19.262	1.13334	0.815538	1.90658	3.98875	4.37433	3.02414	2.1591	4	2
Katna1	7.39678	5.02687	6.13672	32.8219	126.487	165.376	131.024	76.4277	-0.557237	-0.26943	2.14969	4.09595	4.48271	4.14679	3.36913	4	2
Ppil4	5.7723	6.41225	3.83473	18.5103	58.728	71.9433	57.3604	33.3742	0.151684	-0.590021	1.68111	3.34683	3.63964	3.31284	2.53152	4	2
Tspyl1	72.4844	63.3089	118.552	151.653	160.44	177.096	173.588	149.92	-0.195262	0.709778	1.06503	1.14629	1.28879	1.25992	1.04845	4	2
Mical1	155.564	408.134	350.361	220.907	409.062	526.113	406.368	201.891	1.39153	1.17133	0.505931	1.39481	1.75786	1.38528	0.376068	4	2
Ostm1	15.7282	27.2818	16.5842	26.521	106.204	166.551	148.399	88.0652	0.794585	0.0764558	0.753782	2.75541	3.40454	3.23806	2.48522	4	2
Bsg	5.99461	5.76765	5.8965	12.7231	54.085	77.836	67.3094	37.6488	-0.0556823	-0.023807	1.08571	3.17349	3.6987	3.48907	2.65087	4	2
Arid3a	4.46068	3.2562	3.58027	6.59454	15.3306	18.4436	13.4583	9.51531	-0.454074	-0.317195	0.564008	1.78108	2.04778	1.59316	1.09299	4	2
Zbtb7a	23.3425	28.1661	33.895	44.5762	49.2081	62.5655	61.6984	38.6872	0.271001	0.538113	0.933315	1.07594	1.42241	1.40227	0.728897	4	2
Eef2	118.951	202.478	152.174	170.826	333.689	447.225	405.13	265.85	0.767398	0.355354	0.52216	1.48814	1.91063	1.76802	1.16025	4	2
Apba3	16.0419	17.7683	21.2292	35.1281	35.4967	37.7448	27.6483	20.3602	0.147461	0.404205	1.13078	1.14584	1.23443	0.785346	0.343907	4	2
Pip5k1c	11.2303	28.9851	24.6585	17.1532	25.6772	40.7335	39.5459	18.2504	1.36791	1.13469	0.611081	1.19309	1.85882	1.81613	0.700532	4	2
Txnrd1	23.6107	16.2949	33.279	56.8037	58.6233	60.9888	50.0087	39.3349	-0.53502	0.495171	1.26654	1.31203	1.3691	1.08274	0.736369	4	2
Arl1	7.64261	10.8743	9.36942	8.53723	13.7676	15.531	13.3247	10.0855	0.508785	0.293894	0.159703	0.84914	1.02301	0.801966	0.400145	4	2
Ndufa12	2.49001	2.95322	2.05389	4.36008	23.6192	57.3327	47.0917	16.7344	0.246137	-0.277793	0.808203	3.24574	4.52513	4.24125	2.74859	4	2
Ppp1r12a	43.6744	33.6961	70.8539	95.9223	89.1207	99.2447	70.154	43.4587	-0.374206	0.698059	1.13508	1.02897	1.1842	0.683737	-0.00714286	4	2
Gns	13.1661	17.1593	16.085	19.9471	29.3383	32.522	22.7515	16.6751	0.382163	0.288888	0.599351	1.15596	1.30459	0.789134	0.340867	4	2
Cdk4	16.8392	11.5137	24.3619	35.2462	34.8669	42.3097	30.1512	20.2971	-0.548472	0.532803	1.06564	1.05003	1.32916	0.840392	0.26945	4	2
Arhgap9	18.0033	17.6437	16.0669	19.9334	31.8662	38.8895	33.3293	23.9228	-0.0291082	-0.16417	0.146926	0.823766	1.11112	0.88853	0.410125	4	2
Atp5b	21.8019	35.392	28.6055	37.3223	68.1092	78.7958	77.5043	64.6199	0.698969	0.391839	0.775584	1.6434	1.85366	1.82982	1.56752	4	2
Stat2	18.9364	18.889	18.0084	33.2329	67.8456	85.7143	80.9252	54.0741	-0.00361576	-0.0724921	0.81145	1.84109	2.17837	2.09543	1.51378	4	2
Sarnp	3.25358	2.60799	8.19861	20.3108	42.9925	77.0806	70.3346	31.4249	-0.31909	1.33335	2.64215	3.72399	4.56627	4.43413	3.27181	4	2
Rab32	25.756	22.2591	20.7541	16.4009	38.3096	57.3167	54.5985	40.4395	-0.210513	-0.311512	-0.651134	0.572797	1.15405	1.08395	0.650857	4	2
Marcks	11.5429	7.20163	7.91907	28.0098	79.9667	106.558	102.143	73.2373	-0.68061	-0.543603	1.27893	2.79239	3.20656	3.14551	2.66557	4	2
Slc16a10	13.8505	18.2408	21.7475	22.8989	26.876	29.2643	21.8449	15.9904	0.397231	0.650912	0.72534	0.95638	1.0792	0.657358	0.207268	4	2
Ddit4	80.9235	100.501	485.369	500.848	484.845	538.737	228.553	138.901	0.312579	2.58445	2.62974	2.58289	2.73495	1.4979	0.779426	4	2
Anapc16	8.21683	4.87505	5.97823	14.7497	37.7986	47.3093	40.6514	30.7077	-0.753165	-0.458864	0.844032	2.20168	2.52547	2.30665	1.90195	4	2
Vps26a	24.0258	27.4851	31.1396	26.411	52.8903	68.7788	49.1726	33.2065	0.194065	0.374166	0.136554	1.13842	1.51738	1.03327	0.466881	4	2
Ddt	4.50282	6.48179	11.7399	7.47034	10.2503	14.8515	13.3473	8.02929	0.525563	1.38252	0.730345	1.18677	1.72171	1.56765	0.834444	4	2
Ppap2c	7.52639	5.5919	4.75646	6.10292	24.2652	35.3833	29.5873	16.3845	-0.428619	-0.66207	-0.302458	1.68886	2.23304	1.97495	1.1223	4	2
Plekhj1	35.0064	37.336	59.3136	56.902	63.2568	83.2096	69.2199	46.6742	0.0929487	0.760744	0.700861	0.853602	1.24913	0.983568	0.415007	4	2
Mrpl54	14.435	13.5579	11.7561	16.2402	35.8061	50.5215	37.5742	23.6241	-0.0904374	-0.296162	0.169998	1.31063	1.80733	1.38017	0.710688	4	2
Hmg20b	10.3283	19.1613	24.8961	15.7667	25.0368	32.5617	20.3926	12.537	0.891593	1.26932	0.610278	1.27745	1.65657	0.981443	0.279589	4	2
Sirt6	121.349	87.4519	134.97	205.264	267.459	316.957	304.976	191.192	-0.472601	0.153477	0.758318	1.14016	1.38512	1.32953	0.65586	4	2
Socs2	6.27057	4.71549	3.87172	7.17876	21.5858	26.6215	18.7925	11.8278	-0.411189	-0.695622	0.195138	1.78341	2.08592	1.58349	0.915513	4	2
Tbc1d15	11.53	9.82824	11.5601	15.269	49.2563	61.9457	56.2819	36.8473	-0.230388	0.00376136	0.405213	2.09492	2.42561	2.28728	1.67617	4	2
Rab21	6.89634	3.88317	4.07015	4.05174	24.5132	48.4498	41.9846	20.4684	-0.828596	-0.760749	-0.767289	1.82966	2.81259	2.60596	1.5695	4	2
Yeats4	11.5022	23.0864	19.6324	18.5211	35.1333	38.606	21.219	14.0991	1.00513	0.771327	0.68726	1.61093	1.74692	0.883447	0.293693	4	2
Cpsf6	27.26	22.5255	31.1495	49.886	65.9267	84.6424	75.2676	50.6663	-0.275226	0.192423	0.871849	1.27408	1.63459	1.46524	0.894241	4	2
Os9	23.3364	30.6916	29.5151	35.2477	109.921	174.519	166.507	103.223	0.395262	0.338871	0.594947	2.23581	2.90273	2.83493	2.14511	4	2
Mbd6	12.704	10.4005	13.9909	21.6065	24.0423	28.6981	22.1401	14.9762	-0.28863	0.139206	0.766183	0.920292	1.17567	0.801379	0.237389	4	2
Lrp1	118.385	96.9581	116.896	128.226	175.197	246.405	227.55	160.436	-0.288053	-0.0182607	0.115203	0.565492	1.05755	0.942697	0.438512	4	2
Nab2	8.02267	17.0464	16.1743	13.0374	14.3035	17.9277	14.7264	11.5319	1.08731	1.01155	0.700502	0.834214	1.16004	0.87625	0.523476	4	2
Rab5b	8.59267	8.63162	14.1827	16.801	21.6047	23.6397	15.4782	10.1986	0.00652486	0.722954	0.967369	1.33017	1.46003	0.849059	0.247193	4	2
Cdk2	23.0358	27.9218	36.3093	56.8206	83.583	88.1239	64.3464	46.0987	0.277514	0.656461	1.30254	1.85933	1.93566	1.48198	1.00085	4	2
Sfi1	38.6696	70.8258	64.1325	62.191	72.2376	91.0974	74.4418	41.2143	0.873075	0.729856	0.685506	0.90155	1.23621	0.944913	0.0919452	4	2
Pes1	8.41645	11.9393	10.0485	15.2827	72.3889	119.286	93.936	41.4057	0.504435	0.255696	0.860616	3.10448	3.82507	3.48039	2.29855	4	2
Ascc2	20.2434	27.1317	26.1421	36.5803	51.1862	57.9619	44.3318	29.8609	0.422528	0.368923	0.853615	1.3383	1.51765	1.13089	0.560806	4	2
Thoc5	7.32423	33.5787	23.3294	17.763	67.3281	111.294	66.0747	22.844	2.1968	1.6714	1.27813	3.20046	3.92555	3.17335	1.64107	4	2
Ppp3r1	55.2214	47.4969	58.5235	70.4366	143.817	173.32	122.771	95.2354	-0.217394	0.0837886	0.351098	1.38093	1.65014	1.15267	0.78627	4	2
Rab1	4.4719	6.88745	6.61145	7.3707	9.16545	11.9421	11.3189	10.0182	0.623082	0.564079	0.720914	1.03532	1.4171	1.33977	1.16366	4	2
Lcp2	4.7665	14.1037	18.0967	14.7741	16.5966	19.6069	14.521	11.724	1.56507	1.92472	1.63207	1.79989	2.04036	1.60714	1.29846	4	2
Gnb2l1	12.6199	18.9577	17.2226	12.8201	22.5905	31.8738	29.6102	19.0974	0.587083	0.448602	0.022707	0.840016	1.33667	1.23039	0.597676	4	2
Clk4	42.5704	37.3566	26.3577	22.2102	60.7226	85.8416	67.4262	49.1731	-0.188487	-0.691626	-0.938628	0.512383	1.01183	0.663459	0.208019	4	2
Nhp2	10.2579	19.7011	16.3419	8.74401	13.8114	20.5507	15.5138	11.59	0.941541	0.67184	-0.230368	0.429124	1.00245	0.596817	0.176145	4	2
Ppp2ca	3.17	2.35831	7.65833	8.21796	10.9213	13.0632	9.95198	6.15056	-0.426729	1.27255	1.3743	1.78459	2.04295	1.6505	0.956235	4	2
Skp1a	24.8806	13.8779	22.5532	38.4396	52.8514	56.1714	48.7025	38.3397	-0.842232	-0.141689	0.627572	1.08692	1.17481	0.968975	0.623818	4	2
Fnip1	36.8784	56.6739	34.9959	49.4983	109.354	129.746	93.4957	65.5854	0.619908	-0.0755902	0.424603	1.56816	1.81484	1.34212	0.830599	4	2
G3bp1	7.5483	13.4177	7.55747	4.82078	29.2234	55.7768	32.6409	13.7118	0.829914	0.00175158	-0.646885	1.9529	2.88544	2.11246	0.861194	4	2
Cnot8	15.8455	11.7981	16.5712	25.1159	30.471	33.8033	26.238	21.7264	-0.425519	0.0646049	0.664528	0.943364	1.09309	0.727585	0.455376	4	2
Mrpl55	7.06483	7.42125	19.5451	36.4987	57.8109	80.2866	64.2173	28.7444	0.0710074	1.46808	2.36912	3.03261	3.50643	3.18424	2.02455	4	2
Trpv2	18.0679	23.6733	22.0907	27.7504	39.5875	59.3901	53.1712	29.9044	0.389832	0.29001	0.61908	1.13162	1.71679	1.55722	0.726929	4	2
1810027O10Rik	12.9994	11.393	13.0959	17.4885	28.2628	35.8867	35.5024	26.3311	-0.190297	0.0106702	0.427962	1.12046	1.465	1.44947	1.01832	4	2
Med11	6.75013	8.20353	5.69006	9.20564	22.2803	25.0318	19.6865	13.3864	0.28133	-0.246471	0.447603	1.72278	1.89077	1.54422	0.987781	4	2
Rnf167	22.754	29.3297	79.2217	122.346	186.159	217.596	208.621	146.842	0.366242	1.79978	2.42677	3.03234	3.25746	3.19669	2.69007	4	2
Txndc17	19.6611	16.301	20.855	24.7552	36.7391	40.1156	29.0207	24.1934	-0.270384	0.0850493	0.332388	0.901972	1.02882	0.561738	0.299269	4	2
Scarf1	9.84121	11.1763	12.6539	12.122	18.0416	24.9678	18.8811	13.5198	0.183535	0.362674	0.30072	0.87442	1.34316	0.940035	0.458166	4	2
Inpp5k	3.53026	7.07149	9.08134	18.6935	18.5704	22.1797	16.9131	13.7829	1.00224	1.36313	2.40469	2.39516	2.65139	2.26029	1.96503	4	2
Myo1c	1.72957	1.43423	3.33543	2.76154	4.92265	15.2234	15.0393	8.89705	-0.270137	0.947459	0.67506	1.50902	3.13781	3.12025	2.36291	4	2
Ywhae	0.916997	5.67793	12.4485	15.337	103.464	186.434	81.3643	22.9218	2.63038	3.76291	4.06396	6.818	7.66753	6.47134	4.64366	4	2
Git1	1.70424	21.5325	142.42	144.758	872.417	1976.12	666.71	83.4817	3.65932	6.38488	6.40837	8.99975	10.1793	8.61179	5.61426	4	2
Aldoc	0.94086	0.820138	4.89882	12.9981	74.9501	145.739	95.4012	29.4066	-0.198113	2.38038	3.78818	6.31581	7.27519	6.66388	4.96602	4	2
Nos2	4.56611	4.79821	7.37495	4.90577	10.0042	14.4186	8.51559	5.19394	0.0715307	0.691668	0.103514	1.13157	1.65889	0.899141	0.185864	4	2
Suz12	1.40418	0.972342	1.90272	22.3067	331.534	676.962	405.55	131.494	-0.530192	0.438335	3.98968	7.88329	8.9132	8.17401	6.54913	4	2
Zfp207	1.30032	1.93108	1.56932	4.05065	13.8273	24.8503	10.5731	4.84898	0.570541	0.271273	1.63929	3.41058	4.25632	3.02346	1.89881	4	2
Mrps23	16.797	24.4263	23.9305	29.571	61.2996	89.9613	68.7363	37.1845	0.540232	0.510647	0.815979	1.86767	2.4211	2.03287	1.1465	4	2
Phb	0.333357	0.708606	2.28877	17.6648	86.2015	170.271	144.781	67.5816	1.08792	2.77943	5.72767	8.0145	8.99655	8.76259	7.66342	4	2
Cbx1	9.73369	9.0065	5.19859	6.77596	35.756	52.1529	47.7226	30.8928	-0.11202	-0.904866	-0.522561	1.87713	2.42169	2.29361	1.66621	4	2
Mllt6	2.50022	2.72406	4.02041	71.8954	933.793	1904.08	1254.79	335.592	0.123703	0.685288	4.84577	8.5449	9.57282	8.97118	7.06851	4	2
Psmd3	1.37379	2.11037	1.7427	1.94042	6.00179	11.6482	10.345	4.23005	0.619334	0.343163	0.498207	2.12723	3.08387	2.9127	1.62251	4	2
Msl1	0.604332	0.882584	11.0807	10.06	16.2011	17.7859	7.02985	3.65938	0.546392	4.19656	4.05715	4.74461	4.87925	3.54008	2.59819	4	2
Casc3	3.53123	2.4364	2.17778	7.02545	21.4827	27.3852	19.6893	11.1904	-0.53542	-0.697313	0.99242	2.60493	2.95515	2.47917	1.66402	4	2
Igfbp4	2.66198	2.86568	1.74146	12.1879	144.513	286.663	225.416	101.628	0.106378	-0.612202	2.19488	5.76256	6.75071	6.40395	5.25465	4	2
Cnp	2.05865	2.10787	1.22947	6.59949	28.9241	45.8778	45.5091	32.0353	0.0340873	-0.743662	1.68066	3.8125	4.47803	4.46638	3.95989	4	2
Tlk2	25.1345	43.5133	41.9755	18.2236	13.5505	10.5911	13.6027	15.0818	0.791787	0.739879	-0.463861	-0.891323	-1.24682	-0.885776	-0.73686	4	2
Map3k3	98.1066	141.279	84.604	61.5302	49.8167	44.214	80.3615	80.4965	0.526125	-0.213624	-0.673056	-0.977721	-1.14985	-0.287846	-0.285424	4	2
Psmc5	55.9768	37.5647	36.6918	36.7047	31.6767	26.8408	37.5016	50.953	-0.575451	-0.609371	-0.608864	-0.821407	-1.0604	-0.577877	-0.135662	4	2
Gna13	17.5352	14.0478	11.1431	8.37815	7.50718	7.22291	9.42386	14.4727	-0.31991	-0.654103	-1.06555	-1.22391	-1.2796	-0.895864	-0.27692	4	2
Sec14l1	23.2163	10.9646	9.38675	6.84759	5.31496	4.97705	13.1178	18.72	-1.08228	-1.30644	-1.76147	-2.12701	-2.22178	-0.823612	-0.310558	4	2
Pgs1	54.3981	93.5353	80.1087	51.1758	26.0026	24.5771	45.666	55.9439	0.781955	0.558403	-0.0880945	-1.0649	-1.14624	-0.252436	0.0404246	4	2
Gaa	39.7782	62.2734	62.239	25.032	22.1829	18.2547	22.5577	31.6404	0.646638	0.645841	-0.668204	-0.84253	-1.12371	-0.818358	-0.33021	4	2
Mrpl12	15.9153	20.4766	16.0249	14.8265	9.35734	7.50031	11.9245	15.3632	0.363562	0.009901	-0.102236	-0.766244	-1.08539	-0.416486	-0.0509356	4	2
Narf	10.7698	17.1837	8.97341	5.51108	4.36988	3.83604	8.52542	10.7673	0.674049	-0.263263	-0.966584	-1.30133	-1.4893	-0.337149	-0.000334933	4	2
Rnf185	12.3091	14.1844	14.7216	11.6691	5.98193	4.84756	7.40162	10.1255	0.20458	0.258209	-0.077032	-1.04104	-1.34439	-0.733812	-0.281732	4	2
Mtmr3	41.0049	25.487	26.865	26.224	22.76	19.0141	24.5354	32.669	-0.686035	-0.610068	-0.644909	-0.849296	-1.10873	-0.740932	-0.327874	4	2
Mrps24	6.35463	6.58779	11.1972	12.0819	4.69471	3.07604	6.07076	6.52092	0.0519864	0.817258	0.926967	-0.436772	-1.04673	-0.065931	0.0372674	4	2
Nudcd3	27.6716	37.2723	24.24	15.7618	13.8637	10.8547	12.1443	18.3802	0.429698	-0.191016	-0.811974	-0.997094	-1.35009	-1.18813	-0.590254	4	2
Myo1g	87.3323	105.826	79.4645	59.3944	43.0099	41.8942	56.5888	78.4528	0.277107	-0.136205	-0.556188	-1.02185	-1.05976	-0.625999	-0.15469	4	2
Pno1	12.9463	9.86917	8.12775	9.25619	7.2492	5.64918	9.66597	11.8969	-0.391539	-0.671612	-0.484049	-0.836646	-1.19643	-0.421553	-0.121954	4	2
Rel	25.5819	44.7554	37.2122	23.5903	16.7781	12.6207	12.9582	21.3017	0.806938	0.540652	-0.11693	-0.608544	-1.01933	-0.981258	-0.264155	4	2
Pttg1	54.2797	80.2389	64.8363	47.7429	34.4767	26.3009	29.3795	38.7564	0.563889	0.256389	-0.185127	-0.654791	-1.0453	-0.885603	-0.485978	4	2
Ube2b	34.1003	25.8588	21.4054	15.065	13.9405	12.3956	27.7451	33.2752	-0.399129	-0.67181	-1.17858	-1.2905	-1.45996	-0.297551	-0.0353371	4	2
Hspa4	10.5363	13.3219	8.21511	7.45168	6.27616	5.23161	7.88031	7.69824	0.338432	-0.359017	-0.499731	-0.747414	-1.01004	-0.419044	-0.452768	4	2
Arf1	14.7661	24.7155	16.6746	11.2724	9.00355	7.07234	7.38173	9.04049	0.743127	0.175363	-0.389494	-0.713723	-1.06203	-1.00026	-0.707816	4	2
Aldh3a2	13.4195	15.3355	12.0165	9.22478	6.5865	5.77708	7.59626	14.1928	0.192544	-0.159314	-0.540745	-1.02675	-1.21592	-0.82097	0.0808283	4	2
Mapk7	13.9008	9.13355	11.3482	9.35879	6.59369	6.49926	7.32691	10.9532	-0.60592	-0.292704	-0.570774	-1.07601	-1.09682	-0.923891	-0.343815	4	2
Map2k4	27.1846	19.551	19.2808	18.1209	16.1469	13.4551	18.4116	24.5756	-0.475547	-0.495625	-0.585135	-0.751532	-1.01464	-0.562175	-0.145563	4	2
Ndel1	33.3396	22.9754	21.6974	18.7971	16.1236	12.2465	13.1782	21.293	-0.537147	-0.619715	-0.826727	-1.04806	-1.44487	-1.33908	-0.646858	4	2
Mpdu1	93.7566	78.4636	56.2431	34.7161	24.0432	20.753	32.8818	55.0156	-0.256897	-0.737244	-1.43332	-1.96329	-2.1756	-1.51163	-0.769079	4	2
Nup88	14.7287	15.4029	14.9305	10.7843	7.72468	6.92921	8.40927	13.0466	0.0645719	0.0196324	-0.449698	-0.931083	-1.08787	-0.808578	-0.174956	4	2
C1qbp	37.4917	51.4845	31.4199	17.2692	14.2636	13.0762	27.0637	35.9769	0.457567	-0.254893	-1.11837	-1.39423	-1.51963	-0.470212	-0.0595004	4	2
Derl2	13.2019	16.8288	10.9457	6.62153	5.82812	5.44989	7.65958	8.13971	0.350187	-0.270381	-0.995509	-1.17964	-1.27645	-0.785408	-0.697696	4	2
Gosr1	63.1318	47.6646	44.3586	42.3078	35.2882	31.4624	46.9977	56.0396	-0.405449	-0.509153	-0.577443	-0.839181	-1.00474	-0.425777	-0.17192	4	2
Supt6h	30.0283	13.9914	19.2553	19.7947	11.9584	10.2815	16.6504	25.4819	-1.10178	-0.641067	-0.601209	-1.3283	-1.54627	-0.850766	-0.23685	4	2
Dynll2	11.8333	20.0602	11.7091	9.85931	6.35699	5.20717	7.32805	8.57912	0.761484	-0.0152223	-0.263294	-0.896437	-1.18428	-0.691351	-0.463951	4	2
Xylt2	31.753	21.5917	20.5886	17.5882	16.6521	14.6316	20.6579	31.2256	-0.556416	-0.625047	-0.852285	-0.931189	-1.11781	-0.620199	-0.0241636	4	2
Pip4k2b	43.8013	35.8428	26.4804	22.0212	23.053	21.4063	28.7417	36.4191	-0.28929	-0.726049	-0.992081	-0.926019	-1.03294	-0.607828	-0.266278	4	2
Jup	11.8088	13.387	9.25022	3.5129	4.27384	3.47659	6.40777	11.6322	0.18097	-0.352303	-1.74913	-1.46626	-1.76412	-0.881968	-0.0217384	4	2
Dnajc7	21.7822	12.1875	12.443	7.98128	8.79374	7.80176	10.6599	12.1311	-0.837747	-0.807815	-1.44846	-1.3086	-1.48128	-1.03096	-0.844439	4	2
Mif4gd	11.8847	6.74244	9.88568	9.21352	5.35448	4.7234	8.8502	10.7958	-0.817763	-0.265693	-0.367281	-1.15029	-1.33121	-0.425324	-0.138635	4	2
Acox1	20.3782	33.7464	30.3811	22.8858	14.0893	9.37023	9.88324	14.4378	0.727707	0.576147	0.167426	-0.532427	-1.12087	-1.04397	-0.497176	4	2
Cyth1	16.9114	13.3291	13.3903	10.9966	8.56847	6.65041	11.2258	18.9345	-0.343417	-0.336808	-0.620939	-0.980887	-1.34648	-0.591178	0.163021	4	2
P4hb	35.8189	17.4864	25.4663	24.7712	13.4455	12.7423	24.2719	34.0573	-1.03449	-0.492132	-0.532057	-1.4136	-1.4911	-0.561434	-0.072757	4	2
Arhgdia	27.7314	21.7472	19.8743	17.9946	12.7512	10.5657	12.6262	15.8654	-0.350691	-0.480616	-0.623956	-1.12089	-1.39213	-1.1351	-0.805637	4	2
Dnmt3a	12.6844	13.6816	15.2169	9.97622	7.22787	5.97734	7.93609	10.3861	0.109182	0.262619	-0.34649	-0.811413	-1.08548	-0.676555	-0.288401	4	2
Odc1	23.6435	14.1384	15.2399	11.681	8.1386	7.21803	8.7276	13.4755	-0.741825	-0.63359	-1.01728	-1.53859	-1.71177	-1.43779	-0.811105	4	2
Kidins220	21.5427	26.2956	21.3912	17.8393	11.5068	9.33324	15.7066	25.4855	0.287622	-0.0101817	-0.27214	-0.904712	-1.20675	-0.455828	0.242478	4	2
Adi1	10.7447	7.69108	14.0806	6.98603	5.03897	3.15929	4.12141	5.86455	-0.482367	0.390084	-0.62108	-1.09242	-1.76595	-1.38242	-0.873533	4	2
Sypl	25.1179	14.8015	15.5023	12.0001	11.0878	9.49542	10.9303	17.5076	-0.762972	-0.696234	-1.06567	-1.17974	-1.40341	-1.20038	-0.520735	4	2
Scfd1	11.0125	13.9953	14.6312	8.31105	3.61853	3.30448	4.66941	5.68117	0.3458	0.409906	-0.406039	-1.60567	-1.73665	-1.23783	-0.954882	4	2
Psma6	10.6124	13.114	10.8351	7.05618	3.51243	2.66979	3.27561	6.27319	0.305357	0.0299615	-0.588792	-1.59521	-1.99095	-1.69592	-0.75848	4	2
Gpx4	12.7255	5.85468	7.94688	11.459	17.1556	24.2839	27.409	22.7361	-1.12006	-0.679262	-0.151241	0.430957	0.932278	1.10693	0.837262	6	3
Hist4h4	27.4226	9.51811	17.9829	31.0659	62.2988	94.6165	155.936	129.688	-1.52662	-0.60874	0.179966	1.18384	1.78673	2.50752	2.24161	6	3
2610029G23Rik	5.64165	2.70479	3.00694	5.11054	19.9038	39.1351	53.1638	29.7281	-1.0606	-0.907821	-0.142641	1.81885	2.79427	3.23626	2.39764	6	3
Hspa1l	499.761	242.541	283.329	453.389	553.517	700.727	1031.23	784.804	-1.04301	-0.81876	-0.140489	0.147389	0.487614	1.04506	0.651094	6	3
Atp6v1h	35.446	31.6564	16.7642	18.0917	42.6259	57.1525	75.2434	70.2494	-0.163126	-1.08024	-0.970295	0.266107	0.689194	1.08594	0.986863	6	3
Imp4	27.9164	15.0228	6.64846	14.6403	34.2116	46.9992	78.5665	63.7416	-0.893959	-2.07002	-0.931168	0.293373	0.751523	1.4928	1.19112	6	3
Plekhb2	5.97152	5.05313	3.36968	2.55947	14.2374	29.3213	33.3405	23.285	-0.240921	-0.825487	-1.22225	1.25352	2.29578	2.48111	1.96323	6	3
Eif5b	2.46464	1.52278	1.50667	1.22625	4.00742	10.3418	27.957	24.8973	-0.694669	-0.710013	-1.00712	0.701297	2.06904	3.50376	3.33654	6	3
Tpp2	4.94236	2.23331	1.83906	2.03544	22.0018	58.1729	119.221	103.979	-1.14602	-1.42623	-1.27986	2.15435	3.55708	4.59229	4.39495	6	3
Ormdl1	1.70961	0.681912	0.917301	2.01973	6.56737	12.3191	12.846	7.77445	-1.32601	-0.8982	0.240495	1.94165	2.84916	2.90958	2.18507	6	3
Hspe1	2.73981	0.95269	1.86753	2.97616	7.87503	13.6873	14.0502	7.92193	-1.524	-0.552944	0.119376	1.52321	2.32069	2.35844	1.53178	6	3
Cflar	4.11224	1.55293	2.00196	5.15902	10.7852	14.4995	24.0008	13.2898	-1.40493	-1.03851	0.327173	1.39106	1.81801	2.54509	1.69232	6	3
Eef1b2	40.0565	59.7527	63.4806	62.363	61.6212	80.258	106.844	101.372	0.576968	0.664279	0.638654	0.62139	1.00261	1.4154	1.33955	6	3
Atic	17.6642	23.2128	18.4226	22.3986	70.3646	126.398	187.259	142.347	0.394092	0.0606483	0.34258	1.99402	2.83907	3.40613	3.01051	6	3
Rqcd1	21.969	22.3268	19.3412	17.2317	34.2849	50.8373	54.6838	32.9396	0.0233073	-0.183792	-0.350404	0.642104	1.21042	1.31564	0.584354	6	3
Sp140	17.0553	14.4322	13.4847	16.1382	21.7193	27.2759	36.6519	26.6706	-0.240929	-0.338897	-0.0797405	0.348757	0.677407	1.10367	0.64503	6	3
Inpp5d	17.5639	27.6187	22.9701	15.5844	18.0623	26.4894	36.4868	28.0991	0.653032	0.387144	-0.172511	0.0403684	0.592802	1.05476	0.677911	6	3
Atg16l1	3.67158	6.96043	6.99671	8.18804	11.78	17.6354	22.4397	15.3994	0.922775	0.930276	1.15712	1.68187	2.264	2.61158	2.0684	6	3
Dgkd	14.7334	16.7538	19.7667	29.6893	67.4733	122.936	163.318	97.0627	0.185398	0.423982	1.01085	2.19523	3.06075	3.47052	2.71983	6	3
Ube2f	8.43287	6.40567	6.84682	4.80025	11.1138	18.9302	22.0351	15.0607	-0.396674	-0.30059	-0.812914	0.398257	1.16659	1.38571	0.836693	6	3
R3hdm1	9.27296	8.5001	13.4503	29.5449	102.682	146.445	148.633	97.283	-0.12555	0.536537	1.67181	3.46901	3.98119	4.00258	3.39109	6	3
Ubxn4	9.25692	7.91931	8.62204	6.48719	7.96939	12.6548	23.3157	15.7109	-0.225158	-0.102503	-0.512939	-0.216063	0.451081	1.3327	0.763162	6	3
5430435G22Rik	46.055	38.7355	39.1692	46.9751	76.9505	98.295	98.4689	70.0332	-0.249701	-0.233638	0.0285384	0.740573	1.09376	1.09631	0.604681	6	3
Rfwd2	7.00218	10.5841	13.7556	11.4205	12.7562	13.5616	16.5675	15.6922	0.596023	0.974143	0.70575	0.865323	0.953651	1.24248	1.16417	6	3
Cd48	33.3899	24.2959	23.8238	26.3571	38.5612	58.3671	74.1553	56.8626	-0.458699	-0.487008	-0.34122	0.207738	0.805744	1.15114	0.768068	6	3
Copa	19.631	34.9652	43.4522	56.9854	61.441	75.4131	75.5286	39.6573	0.832786	1.1463	1.53746	1.64607	1.94168	1.94389	1.01445	6	3
Pycr2	7.19124	10.2778	5.69915	4.28004	10.6851	18.0391	18.4713	12.1457	0.515219	-0.335494	-0.748616	0.571288	1.32681	1.36097	0.756133	6	3
Batf3	10.7737	11.9651	11.3013	12.9338	19.2609	25.5096	29.8783	25.9903	0.151319	0.0689749	0.263632	0.838161	1.24353	1.47158	1.27046	6	3
Slc30a1	14.3185	36.8777	19.3476	8.01383	32.2406	105.302	169.281	65.6051	1.36487	0.434274	-0.837317	1.171	2.87858	3.56347	2.19593	6	3
Vcpip1	9.15013	6.6181	5.67536	6.6487	17.4272	29.1389	30.8495	24.8969	-0.467375	-0.68908	-0.46072	0.929477	1.67108	1.75338	1.4441	6	3
Ube2w	5.45339	3.84337	3.42306	3.93816	8.95374	15.1265	24.8047	20.8514	-0.504781	-0.671867	-0.469632	0.715337	1.47185	2.18539	1.93492	6	3
Tbc1d8	23.7529	25.0668	24.71	29.7021	51.1916	77.0081	97.3421	64.7287	0.0776742	0.0569913	0.322461	1.1078	1.69691	2.03496	1.4463	6	3
Gls	335.395	519.58	571.477	754.196	1000.73	1592.78	2267.35	2042.27	0.631485	0.768834	1.16908	1.57712	2.24761	2.75707	2.60624	6	3
Hspd1	5.0831	6.67719	4.28322	8.92993	46.7125	87.584	100.218	66.6848	0.393532	-0.247013	0.81294	3.20003	4.10689	4.30129	3.71358	6	3
Ppil3	49.3532	45.5217	40.4524	38.6304	61.3835	108.18	197.346	157.277	-0.116589	-0.286918	-0.353407	0.314707	1.13222	1.99951	1.67209	6	3
St8sia4	12.5354	9.84606	12.0361	18.5732	24.6328	35.2557	43.0135	32.27	-0.34839	-0.05864	0.567214	0.974573	1.49185	1.77878	1.36419	6	3
D1Ertd622e	16.1883	29.3672	23.1252	21.1505	21.5443	27.253	35.1206	34.7573	0.859254	0.514514	0.38574	0.412355	0.751464	1.11737	1.10236	6	3
Insig2	68.1854	39.6173	55.9592	75.6585	116.718	138.945	164.401	149.599	-0.783332	-0.285088	0.150039	0.775492	1.02698	1.26968	1.13357	6	3
Zc3h11a	8.61228	12.2709	12.5389	7.57361	10.0438	17.3155	19.3782	14.7661	0.510774	0.541944	-0.185414	0.221838	1.0076	1.16997	0.777822	6	3
Ptprc	31.1887	20.5805	37.2121	75.7389	180.501	281.738	335.451	190.553	-0.599745	0.254748	1.28001	2.53291	3.17526	3.42701	2.6111	6	3
Nek7	21.4413	13.5559	24.5191	48.5844	111.055	173.002	204.919	120.027	-0.661471	0.193514	1.1801	2.37281	3.01232	3.25659	2.48489	6	3
Cdc73	102.08	102.962	90.1289	111.135	175.592	242.051	329.104	324.943	0.0124117	-0.179639	0.122613	0.782527	1.24561	1.68884	1.67049	6	3
Psen2	43.2484	59.8415	43.5413	37.7536	65.3937	98.7748	114.002	90.229	0.4685	0.00973772	-0.196033	0.596505	1.1915	1.39834	1.06094	6	3
Degs1	46.507	61.6046	57.015	51.8249	72.4796	100.105	132.697	108.437	0.40559	0.293894	0.156198	0.640127	1.10599	1.51262	1.22134	6	3
Capn2	16.1867	12.9633	14.9045	20.4539	42.8586	65.5086	71.0623	38.2248	-0.320376	-0.119061	0.337567	1.40478	2.01688	2.13428	1.2397	6	3
Cr1l	41.4981	37.7761	42.4968	73.6002	77.918	80.1056	94.393	93.5951	-0.135572	0.0343089	0.826664	0.908911	0.948858	1.18563	1.17339	6	3
Cited2	7.85396	8.13262	9.09471	15.4841	14.2121	16.7247	24.9748	23.9935	0.0503	0.211607	0.979295	0.855628	1.09049	1.66898	1.61115	6	3
Hdac2	18.2994	14.651	23.9101	33.2938	35.1455	37.2798	43.0887	37.9973	-0.320797	0.385824	0.863457	0.941544	1.0266	1.23551	1.0541	6	3
Sec63	94.9416	115.956	96.6991	108.938	192.275	273.028	351.401	313.509	0.288465	0.0264621	0.198395	1.01806	1.52394	1.88801	1.72339	6	3
Cd24a	29.9555	43.8254	34.5552	37.7935	68.1964	111.291	135.481	83.9892	0.548946	0.206082	0.335317	1.18687	1.89344	2.1772	1.48738	6	3
Dnajb12	6.19232	6.29518	6.00337	7.7591	8.58037	13.0586	15.4804	9.04719	0.0237676	-0.0447074	0.325409	0.47056	1.07645	1.32189	0.54699	6	3
Herc4	32.2437	41.7952	36.2993	41.6654	110.105	183.278	241.815	187.147	0.37432	0.170924	0.369833	1.77179	2.50694	2.90681	2.53708	6	3
Egr2	4.02384	5.96101	7.20636	11.8795	30.9146	74.1903	164.107	157.215	0.566984	0.840698	1.56183	2.94164	4.20459	5.34992	5.28802	6	3
Cstb	91.8784	130.607	125.948	143.988	139.061	178.068	232.488	213.092	0.507435	0.455031	0.648151	0.59792	0.954631	1.33936	1.21368	6	3
Cdc34	5.36579	5.77388	6.9429	6.52935	8.14569	11.0789	12.4271	8.44885	0.105751	0.371748	0.283149	0.602246	1.04595	1.21163	0.654964	6	3
Cnn2	39.9466	43.3501	34.3102	32.2247	45.1781	65.3798	81.821	63.2684	0.117963	-0.219435	-0.309906	0.177551	0.710772	1.0344	0.663412	6	3
Aes	12.9633	15.4748	14.2184	14.3531	23.282	30.6056	39.9352	26.4218	0.255488	0.133326	0.146929	0.844782	1.23936	1.62323	1.0273	6	3
Atp2b1	4.4455	4.74482	4.5147	4.12899	5.58297	7.89199	13.1121	12.427	0.0940077	0.0222844	-0.106557	0.328687	0.828043	1.56048	1.48306	6	3
Dusp6	10.2978	7.13688	8.30977	8.84887	16.3316	17.2372	23.5512	14.6624	-0.528971	-0.309456	-0.218771	0.66533	0.743189	1.19346	0.509785	6	3
Csrp2	20.9756	29.912	25.5192	23.1994	26.3655	34.5362	44.5865	35.5317	0.512012	0.282871	0.145375	0.329939	0.719397	1.08789	0.760395	6	3
Nap1l1	5.61593	6.72631	7.99663	8.24443	9.07572	13.603	15.975	11.811	0.26029	0.509867	0.553895	0.692487	1.27633	1.50822	1.07253	6	3
Tmbim4	10.0099	11.1934	10.5477	16.6665	51.8548	99.6352	160.738	138.307	0.161221	0.0755009	0.735524	2.37305	3.31523	4.00521	3.78837	6	3
R3hdm2	38.2091	21.7535	29.5121	42.6002	68.0243	97.3015	136.769	115.555	-0.812669	-0.37261	0.156944	0.832134	1.34855	1.83975	1.59659	6	3
Stat6	114.924	111.108	117.205	137.755	212.525	270.682	281.198	247.746	-0.0487174	0.028354	0.261425	0.886952	1.23592	1.29091	1.10818	6	3
Ptges3	2.94894	4.2523	11.0205	21.5751	36.1405	67.6993	72.4637	29.22	0.528047	1.90192	2.8711	3.61535	4.52087	4.61899	3.30869	6	3
Cs	8.07614	6.80847	26.302	53.6891	57.5043	62.637	78.2614	45.7863	-0.246335	1.70343	2.73289	2.83193	2.95528	3.27656	2.50318	6	3
Rnf41	4.88956	7.50462	6.80412	6.33407	6.18886	8.89392	14.117	11.2431	0.618074	0.476704	0.373428	0.339969	0.863115	1.52966	1.20126	6	3
Tab2	6.97618	7.02053	6.14388	7.30799	10.3955	14.5579	14.8441	10.6145	0.00914268	-0.183287	0.0670374	0.57545	1.06129	1.08938	0.605527	6	3
Ltv1	26.6107	22.3426	25.1589	33.89	45.9596	57.8862	77.0036	63.7812	-0.252209	-0.0809376	0.348853	0.78836	1.12121	1.53292	1.26112	6	3
Arg1	94.6459	111.746	111.701	103.39	171.047	261.399	346.292	266.169	0.239611	0.23903	0.127485	0.853781	1.46564	1.87138	1.49173	6	3
Rwdd1	392.696	344.059	430.875	597.686	739.948	908.927	970.873	810.662	-0.190757	0.133856	0.605975	0.914011	1.21075	1.30587	1.04569	6	3
Hk1	96.6309	118.578	121.023	125.551	156.274	172.083	202.96	199.737	0.29528	0.324725	0.377717	0.693521	0.832548	1.07064	1.04755	6	3
Ddx50	4.40591	3.6862	5.77649	16.5674	87.2273	199.154	308.19	207.631	-0.257306	0.390753	1.91084	4.30727	5.4983	6.12824	5.55844	6	3
Reep3	5.00955	4.64495	5.75445	5.98183	7.9945	14.6519	15.1686	8.76988	-0.109018	0.199997	0.255906	0.674327	1.54833	1.59834	0.807876	6	3
Rrp1	3.13865	3.88299	3.4652	4.93214	17.2092	30.8657	41.9759	27.5965	0.307024	0.142794	0.65207	2.45496	3.29779	3.74135	3.13627	6	3
Pdxk	24.4351	26.333	22.5625	29.8023	42.8777	57.8566	63.0724	46.3422	0.107917	-0.115028	0.286469	0.811273	1.24353	1.36805	0.923372	6	3
Rnf126	20.172	26.5289	24.9411	27.4982	41.4474	65.2977	66.5742	41.1166	0.395211	0.306171	0.446983	1.03893	1.69468	1.72261	1.02737	6	3
Mbd3	168.087	183.124	183.913	204.808	251.658	290.147	340.095	293.401	0.123613	0.129815	0.285064	0.582256	0.787576	1.01673	0.803666	6	3
Uqcr11	16.7705	19.1637	24.841	26.1313	25.0751	25.9283	35.7527	26.7744	0.19245	0.566798	0.639853	0.58033	0.628602	1.09213	0.674929	6	3
Tcf3	20.7964	27.1835	24.0362	21.7169	26.6082	41.1944	61.8946	50.49	0.386397	0.208875	0.0624844	0.355537	0.986114	1.57348	1.27966	6	3
Klf16	11.108	7.59763	7.59871	10.6699	29.3396	43.5418	46.1006	28.3514	-0.547978	-0.547773	-0.0580524	1.40125	1.9708	2.05319	1.35182	6	3
Mknk2	6.11829	3.14299	3.16046	12.9818	12.6848	16.4318	22.2807	12.7019	-0.960991	-0.952994	1.08529	1.0519	1.42529	1.86459	1.05384	6	3
Ap3d1	19.1586	12.6473	13.345	15.9431	27.4236	36.8728	40.591	37.7841	-0.599163	-0.521693	-0.26506	0.517426	0.944565	1.08317	0.979787	6	3
Gna15	33.506	21.6512	26.6807	32.4	53.2826	67.3148	79.7264	54.9773	-0.629972	-0.328623	-0.0484257	0.669245	1.0065	1.25064	0.714417	6	3
Appl2	5.1321	6.76414	5.23393	3.60257	5.5348	9.55955	14.8385	14.0573	0.398357	0.0283453	-0.510523	0.108982	0.897393	1.53172	1.4537	6	3
Ckap4	3.88712	4.7597	4.73753	6.15771	10.716	14.5461	18.6435	17.61	0.292169	0.285433	0.663692	1.46299	1.90386	2.2619	2.17962	6	3
Cry1	7.05092	8.16992	22.8842	88.1805	422.963	794.639	1062.98	588.368	0.21251	1.69847	3.64458	5.90658	6.81634	7.23609	6.38276	6	3
D10Wsu52e	2.81747	4.07068	4.72757	6.89281	15.997	38.7374	64.0304	37.7022	0.53087	0.746699	1.29069	2.50533	3.78125	4.50628	3.74218	6	3
Tmpo	11.5486	8.89535	8.63133	12.5304	21.8441	31.5028	35.1343	26.3027	-0.376595	-0.420063	0.117715	0.919526	1.44776	1.60516	1.18749	6	3
Elk3	8.91864	11.8288	10.3217	13.9452	42.1365	67.768	72.4092	49.5368	0.407408	0.210785	0.644873	2.24017	2.92571	3.02128	2.47361	6	3
Cnot2	15.168	27.4428	21.2143	25.7747	48.9204	76.4072	80.7604	55.966	0.855397	0.484006	0.764925	1.68941	2.33268	2.41262	1.88352	6	3
Irak3	4.93068	9.685	7.74548	9.99447	19.2742	44.2917	98.8244	88.5345	0.973965	0.651568	1.01934	1.96681	3.16718	4.32501	4.16638	6	3
Usp15	6.88095	3.92755	3.75454	11.8601	56.8907	102.929	154.761	132.8	-0.808978	-0.873972	0.785437	3.04751	3.9029	4.49129	4.2705	6	3
Bloc1s1	8.0776	5.48114	4.60287	11.5853	66.1549	114.074	126.47	71.8712	-0.559451	-0.811393	0.520297	3.03385	3.8199	3.96872	3.15342	6	3
Upp1	98.991	109.002	108.129	107.864	159.88	246.235	308.558	257.795	0.138985	0.127384	0.123844	0.69162	1.31467	1.64017	1.38086	6	3
Rtn4	91.5928	163.439	305.559	461.848	535.591	669.601	672.672	659.027	0.835446	1.73814	2.33411	2.54783	2.87	2.8766	2.84703	6	3
Slu7	5.44795	5.41856	3.75101	25.1867	167.272	320.108	465.555	429.72	-0.00780396	-0.538434	2.20888	4.94034	5.8767	6.41709	6.30154	6	3
Clint1	6.76651	8.30702	7.77102	9.68268	13.0681	17.5177	22.8765	19.1709	0.295919	0.199692	0.516994	0.949566	1.37233	1.75738	1.50243	6	3
Rnf130	29.5275	18.2127	43.146	110.608	96.3205	121.382	173.127	113.286	-0.697114	0.547168	1.90532	1.70578	2.03942	2.5517	1.93984	6	3
Hnrnph1	19.0633	28.9128	22.3165	19.1988	26.9882	42.2549	62.5622	48.1324	0.60091	0.227313	0.0102183	0.501531	1.14832	1.71449	1.33621	6	3
Sar1b	1072.24	1423.83	1179.16	1960.14	1904.8	1919.36	2287.33	1838.02	0.409149	0.137132	0.870329	0.829012	0.839997	1.09304	0.777525	6	3
Irf1	97.0201	137.375	174.229	251.419	250.361	284.85	295.093	239.159	0.501764	0.844629	1.37374	1.36765	1.55385	1.60481	1.30161	6	3
Igtp	33.2777	28.995	27.8468	38.4104	76.8815	135.929	189.953	153.79	-0.198752	-0.257044	0.206941	1.20808	2.03023	2.51301	2.20833	6	3
Trim11	25.6829	20.569	21.7492	29.755	65.35	93.3312	104.008	66.4747	-0.320336	-0.239846	0.212324	1.34738	1.86155	2.01781	1.372	6	3
Llgl1	16.1675	9.94545	12.2251	33.573	43.9249	47.2325	61.1981	53.1414	-0.700988	-0.40325	1.0542	1.44194	1.54668	1.92039	1.71674	6	3
Map2k3	5.68312	4.77267	5.46163	6.91869	8.63221	10.0515	11.7453	10.0814	-0.251887	-0.0573516	0.283816	0.603047	0.822656	1.04733	0.826941	6	3
Adora2b	7.56722	10.0808	8.4837	5.76648	6.37889	11.719	16.6582	12.2592	0.413775	0.16493	-0.392072	-0.246458	0.631014	1.1384	0.69603	6	3
Gas7	61.6988	63.7283	131.908	171.079	160.033	172.111	180.424	148.529	0.0466917	1.09622	1.47135	1.37506	1.48002	1.54808	1.26743	6	3
Trp53	182.052	151.005	136.501	166.97	251.894	322.451	431.203	429.706	-0.269754	-0.415439	-0.124762	0.468466	0.824729	1.24402	1.239	6	3
Fxr2	6.92987	7.37885	14.8106	18.7799	18.2643	19.277	21.4754	18.3413	0.0905677	1.09573	1.43829	1.39813	1.47598	1.63178	1.4042	6	3
Phf23	65.3589	48.6033	39.0908	52.0082	93.6314	133.023	151.131	99.3221	-0.427329	-0.741555	-0.329645	0.518609	1.02522	1.20934	0.603731	6	3
Psmb6	92.9599	104.263	197.337	256.422	246.24	251.223	260.931	225.872	0.165547	1.08598	1.46384	1.40538	1.43429	1.48899	1.28083	6	3
Pld2	7.2685	5.10579	5.18037	6.17426	9.43808	16.1407	25.7352	20.3051	-0.509523	-0.488603	-0.235391	0.376836	1.15097	1.82401	1.48211	6	3
Ube2g1	18.2247	19.8909	18.0624	17.355	23.221	35.3798	47.699	38.3064	0.126213	-0.0129055	-0.0705437	0.349535	0.957031	1.38806	1.07169	6	3
Atp2a3	7.92319	13.3814	11.5223	10.4091	12.3736	20.3146	26.1334	19.2699	0.756076	0.540275	0.393692	0.643112	1.35836	1.72174	1.2822	6	3
Tsr1	11.0495	6.7511	8.09315	9.06905	21.4288	29.3886	32.2745	21.7659	-0.710787	-0.449208	-0.284958	0.95557	1.41128	1.54641	0.978089	6	3
Prpf8	12.35	7.37241	13.0779	17.8661	24.2355	30.7019	36.1639	26.0813	-0.744303	0.0826199	0.532714	0.972611	1.31382	1.55004	1.0785	6	3
Pitpna	2.91515	2.01182	1.70126	2.06532	5.89549	11.6698	13.6042	7.70508	-0.535069	-0.776966	-0.497205	1.01604	2.00114	2.22241	1.40224	6	3
Crk	2.59463	1.5355	2.07209	3.7866	7.77327	18.1341	23.0129	10.3962	-0.75682	-0.324442	0.545374	1.58299	2.8051	3.14884	2.00246	6	3
Nufip2	3.79049	3.83783	2.7606	7.54199	52.7249	85.2158	89.5676	56.3068	0.0179064	-0.457402	0.992561	3.79803	4.49066	4.56252	3.89285	6	3
Ift20	1.9865	2.73979	1.87064	4.54804	34.895	77.784	123.396	84.5278	0.463837	-0.0866969	1.19502	4.13472	5.29117	5.95692	5.41113	6	3
Adap2	0.561255	0.459366	0.346092	3.90091	81.6619	256.039	377.6	170.063	-0.289012	-0.697501	2.79708	7.18486	8.83349	9.39399	8.2432	6	3
Rhot1	0.546731	0.645155	0.327105	4.93262	119.743	343.396	467.355	246.837	0.238815	-0.741077	3.17345	7.77489	9.29483	9.73947	8.81851	6	3
Taf15	2.20927	2.83762	2.68819	4.41522	7.38936	11.6495	17.9802	12.8476	0.361112	0.283065	0.998916	1.74188	2.39863	3.02477	2.53986	6	3
Spag9	4.37907	3.04263	2.46659	3.57417	14.7079	29.6525	49.8324	30.0692	-0.525306	-0.828107	-0.293016	1.74789	2.75946	3.50839	2.77959	6	3
Ppp1r9b	1.68152	1.28648	0.952655	3.40752	18.4852	34.1152	57.2423	52.0562	-0.386337	-0.81974	1.01896	3.45853	4.34258	5.08924	4.95223	6	3
Spop	2.99792	2.40636	1.91268	3.90028	30.1404	62.6404	111.208	99.1004	-0.317109	-0.648366	0.379616	3.32966	4.38506	5.21315	5.04686	6	3
Gngt2	3.03415	1.61808	1.74316	2.34342	6.6363	13.245	17.9553	10.9593	-0.907009	-0.799587	-0.372677	1.12909	2.12608	2.56505	1.85279	6	3
Mrpl45	5.22614	4.25066	4.34288	3.77889	7.02215	12.5138	16.6093	10.8339	-0.298059	-0.267094	-0.467783	0.426167	1.2597	1.66817	1.05174	6	3
Psmb3	7.52884	8.57373	10.5841	9.82857	12.0688	16.4044	25.0739	17.1611	0.187495	0.491399	0.384554	0.680783	1.12358	1.73569	1.18864	6	3
Lasp1	3.5946	4.0382	4.18497	6.66099	10.519	16.8629	25.5073	19.5315	0.167881	0.219386	0.889905	1.54909	2.22995	2.82701	2.4419	6	3
Stat5a	3.60507	3.38489	2.35173	9.01688	55.2705	116.722	185.351	139.366	-0.0909183	-0.616305	1.3226	3.93841	5.01691	5.68409	5.27271	6	3
Nmt1	42.8929	62.7241	60.2312	45.8754	29.0343	22.6741	16.721	21.9096	0.548281	0.489772	0.0969819	-0.562981	-0.919694	-1.35908	-0.969176	6	3
Psmd12	79.5907	121.311	122.359	83.0268	44.5687	34.3009	34.2413	40.2666	0.608039	0.620448	0.0609772	-0.836569	-1.21435	-1.21686	-0.983016	6	3
Anapc11	11.2203	6.77394	11.5981	11.9845	8.59374	6.29444	4.93107	6.45166	-0.728044	0.0477772	0.0950585	-0.384753	-0.833961	-1.18614	-0.798369	6	3
Trim41	16.0515	18.5164	22.3844	19.3987	11.8934	8.15755	7.62066	9.00439	0.206096	0.479786	0.273252	-0.432547	-0.9765	-1.07472	-0.834008	6	3
Hnrnpab	12.2496	17.7086	12.8815	10.4369	8.05188	6.13245	5.38202	6.49162	0.531716	0.072566	-0.231041	-0.605337	-0.998199	-1.18651	-0.916084	6	3
Anxa6	54.311	49.0262	44.3617	37.3309	28.3763	22.1798	21.3795	34.8659	-0.147691	-0.29193	-0.540874	-0.936558	-1.292	-1.34502	-0.639428	6	3
Cd68	12.0172	6.27458	9.00068	12.1055	10.1119	7.37523	5.61198	6.16799	-0.93751	-0.416995	0.0105619	-0.249047	-0.704341	-1.09852	-0.962228	6	3
Eif4a1	15.0853	22.2914	19.1212	10.5979	8.16612	6.35516	5.12454	7.21025	0.563344	0.34203	-0.509365	-0.885421	-1.24714	-1.55765	-1.06502	6	3
Senp3	16.2547	9.68291	11.3355	10.74	9.44734	7.93598	6.79763	10.0806	-0.747344	-0.520009	-0.597863	-0.782877	-1.03438	-1.25775	-0.689275	6	3
Acap1	22.4855	23.2125	30.4737	31.2388	16.6275	10.3188	9.5762	12.986	0.0459069	0.43857	0.474344	-0.435424	-1.12372	-1.23147	-0.792038	6	3
Cltc	21.1227	7.65231	9.43844	12.1631	12.8577	9.89596	6.84731	7.78719	-1.46483	-1.16217	-0.796283	-0.716162	-1.09388	-1.62519	-1.43962	6	3
Kpnb1	61.6688	47.0964	58.9648	49.3776	44.2245	38.7851	29.4013	34.1806	-0.388924	-0.0646868	-0.320684	-0.479695	-0.669038	-1.06866	-0.851363	6	3
Rpl23	9.22203	12.3023	11.0397	10.143	6.90983	4.80471	3.62778	4.36389	0.415772	0.259545	0.137328	-0.416434	-0.940635	-1.346	-1.07947	6	3
Ccr7	15.8655	14.9394	12.0897	8.02794	7.12581	6.25148	6.06403	8.47023	-0.0867708	-0.392115	-0.982791	-1.15477	-1.34362	-1.38754	-0.90542	6	3
Ccdc47	30.5534	19.1073	20.7977	18.8942	18.1635	15.6135	13.9235	17.0721	-0.677209	-0.554909	-0.693389	-0.750291	-0.968539	-1.13381	-0.839692	6	3
Smarcd2	18.3908	11.2213	10.4625	9.87933	9.8984	9.24072	8.82438	11.0467	-0.712744	-0.813757	-0.896499	-0.893717	-0.992907	-1.05942	-0.735369	6	3
Slc39a11	10.89	10.1651	12.5423	11.8826	6.71559	6.14261	5.06213	5.28717	-0.0993795	0.203798	0.125847	-0.697418	-0.82608	-1.10519	-1.04244	6	3
Atp5h	16.4	14.2062	12.2615	10.9224	10.9569	9.70838	7.27251	7.33179	-0.207175	-0.41956	-0.586406	-0.581856	-0.756393	-1.17317	-1.16146	6	3
Galk1	27.8192	27.9841	25.9284	20.7698	20.1391	17.3081	13.8012	17.961	0.00852642	-0.101548	-0.421594	-0.466082	-0.684634	-1.01129	-0.631213	6	3
Jmjd6	22.7073	27.9794	24.4544	19.8292	15.8128	13.7406	8.97946	15.4291	0.301209	0.106938	-0.19553	-0.522063	-0.724711	-1.33846	-0.557502	6	3
Cant1	10.5464	9.61597	10.2443	10.9045	9.58345	7.2082	5.21831	5.81106	-0.133246	-0.0419292	0.048173	-0.138134	-0.54904	-1.0151	-0.859877	6	3
Actg1	15.1657	9.20261	14.9122	15.0577	10.8968	8.22563	5.99116	6.95962	-0.720697	-0.024319	-0.0103107	-0.476908	-0.882614	-1.3399	-1.12373	6	3
Pdia6	17.5156	14.0221	13.948	10.0288	7.35849	6.06403	5.67724	7.42121	-0.320938	-0.328582	-0.804491	-1.25116	-1.53029	-1.62538	-1.23891	6	3
H2-T23	11.3838	3.32577	5.29426	8.41312	10.84	15.0022	22.7159	28.0196	-1.77522	-1.10448	-0.436269	-0.0706175	0.398192	0.99672	1.29945	8	3
Eno1	14.0652	6.16561	10.3369	12.2432	16.0505	17.5897	27.5501	32.9073	-1.18981	-0.444326	-0.200149	0.190488	0.322601	0.969927	1.22628	8	3
Rpe	104.934	148.699	123.883	130.605	216.544	297.821	406.12	429.187	0.502913	0.239496	0.315728	1.04518	1.50496	1.95242	2.03212	8	3
Agfg1	9.56207	14.3867	11.0488	12.2613	14.283	24.1455	36.1392	40.5757	0.589341	0.208495	0.358717	0.578904	1.33636	1.91817	2.08522	8	3
Ccnt2	6.77163	6.93592	5.97507	6.16876	7.36531	9.98772	14.7076	16.593	0.0345841	-0.180548	-0.134523	0.121243	0.560652	1.11899	1.293	8	3
Fn1	37.4019	40.4595	35.9405	48.0071	122.966	189.488	332.305	369.596	0.113367	-0.0575011	0.360136	1.71708	2.34092	3.15132	3.30477	8	3
Rnf25	54.6391	70.1935	71.2397	101.893	99.3438	95.4625	113.192	118.72	0.361404	0.382748	0.899049	0.862496	0.805	1.05077	1.11956	8	3
Ncl	193.551	270.595	222.945	239.159	318.055	415.322	548.704	584.375	0.483421	0.203974	0.305256	0.716563	1.10152	1.50331	1.59418	8	3
Ralb	117.739	130.5	112.345	97.7844	88.0151	95.9775	174.095	262.685	0.148458	-0.0676564	-0.267916	-0.419769	-0.294824	0.564282	1.15774	8	3
Ddx18	16.4386	10.411	10.6488	8.71158	14.7196	26.0233	51.1392	55.2579	-0.658979	-0.626397	-0.916081	-0.159349	0.662716	1.63734	1.74909	8	3
Rassf5	54.3357	42.1371	42.1761	38.1014	51.0362	72.8598	121.248	127.601	-0.366809	-0.365475	-0.512056	-0.0903795	0.423223	1.15799	1.23167	8	3
Ikbke	8.37614	10.4052	10.2558	8.59527	9.31266	12.8463	16.9994	17.1793	0.312947	0.292083	0.0372574	0.152908	0.616995	1.02113	1.03631	8	3
Lamc1	96.8575	87.9746	85.6254	129.087	237.895	322.685	422.325	424.371	-0.138777	-0.177825	0.414408	1.29639	1.73619	2.12442	2.13139	8	3
Fcgr3	151.813	114.363	100.615	113.906	204.628	299.848	493.851	608.769	-0.408675	-0.59345	-0.414452	0.430708	0.981936	1.70178	2.0036	8	3
Ly9	209.608	233.516	201.765	189.24	286.188	380.515	510.399	546.537	0.155828	-0.0550178	-0.147477	0.449269	0.86026	1.28393	1.38263	8	3
Cep170	21.686	16.6577	12.9998	20.8108	49.2656	103.143	244.112	327.364	-0.380575	-0.738275	-0.0594315	1.18382	2.24981	3.49271	3.91606	8	3
Cd164	110.925	100.019	97.1126	132.847	240.211	331.613	447.83	451.485	-0.14931	-0.191854	0.260181	1.11472	1.57992	2.01337	2.02509	8	3
Smpdl3a	12.3199	12.5232	13.2818	15.345	17.5505	20.4133	26.594	28.1862	0.0236127	0.10846	0.316778	0.510522	0.728519	1.11011	1.194	8	3
Aifm2	518.998	612.62	597.384	625.156	724.897	896.496	1098.34	1126.07	0.239263	0.20293	0.268487	0.482047	0.788568	1.08152	1.1175	8	3
Ccdc6	5.30925	7.11131	6.52721	4.40515	5.75608	7.93626	14.0145	22.2167	0.421607	0.297958	-0.269317	0.116579	0.579951	1.40034	2.06506	8	3
Zwint	48.5714	65.666	59.2246	51.1506	59.7522	66.1868	92.1877	98.0553	0.43504	0.286089	0.0746441	0.298885	0.446436	0.924467	1.01349	8	3
Snrpd3	4.02948	4.51261	3.36765	4.5715	17.7801	31.0796	57.6436	68.0195	0.163368	-0.258851	0.182074	2.1416	2.9473	3.83849	4.07728	8	3
Itgb2	23.4324	27.184	65.4181	100.678	112.089	128.315	163.738	166.459	0.214253	1.48119	2.10317	2.25807	2.45311	2.80481	2.82859	8	3
Igf1	8.45799	4.94755	5.16528	6.45145	8.83649	11.5571	17.2949	17.6815	-0.773601	-0.711468	-0.390691	0.0631586	0.450393	1.03196	1.06385	8	3
Cdk17	8.03756	10.8438	10.4151	8.51358	8.82806	11.2489	14.3919	18.0324	0.432041	0.373847	0.0830083	0.135339	0.484954	0.840428	1.16576	8	3
Ube2n	471.544	386.059	552.367	598.599	831.461	953.197	1248.86	1314.66	-0.288571	0.228235	0.344197	0.818256	1.01538	1.40515	1.47923	8	3
Btg1	472.173	348.233	342.568	391.128	553.494	661.221	972.215	1144.71	-0.439263	-0.462925	-0.271675	0.229252	0.485817	1.04196	1.27759	8	3
B4galnt1	1763.37	2090.63	1749.87	1815.93	2520.8	2968.21	4273.35	4330.95	0.245603	-0.0110875	0.0423734	0.515546	0.751258	1.27703	1.29635	8	3
Sgpl1	15.5944	12.5182	11.6771	12.8004	15.5194	17.0734	27.72	33.7967	-0.317001	-0.417346	-0.284839	-0.00695526	0.130722	0.829899	1.11585	8	3
Hnrnph3	17.1489	39.7361	39.3417	30.462	21.8664	20.5644	30.8005	45.4939	1.21233	1.19794	0.828895	0.3506	0.262033	0.844838	1.40756	8	3
Prmt2	29.5921	16.1077	15.2385	25.982	31.3647	47.0535	60.9276	62.4287	-0.877462	-0.957491	-0.1877	0.0839297	0.66909	1.04188	1.077	8	3
Timm13	43.7286	52.134	43.3712	46.2246	83.9451	115.317	188.745	207.716	0.253647	-0.0118398	0.0800837	0.940869	1.39896	2.10979	2.24796	8	3
Cct2	60.44	64.7263	53.9558	52.5329	64.8601	83.6328	120.902	128.035	0.0988484	-0.163726	-0.202282	0.101828	0.468565	1.00026	1.08296	8	3
Rassf3	12.8545	29.8828	22.2572	20.4535	20.303	23.0962	35.5492	35.9031	1.21704	0.791999	0.670074	0.659419	0.845382	1.46754	1.48183	8	3
Pa2g4	10.1214	11.7233	10.9916	11.4226	12.8285	16.0838	21.3727	25.5591	0.21197	0.118993	0.174482	0.341944	0.668199	1.07836	1.33643	8	3
Stk10	4.52544	6.48869	5.98339	5.66235	8.32417	13.216	21.5184	21.5314	0.519869	0.402905	0.323343	0.879248	1.54616	2.24944	2.25031	8	3
Gm2a	57.787	73.046	60.6399	77.5843	235.338	416.407	757.098	835.408	0.33806	0.0695224	0.42502	2.02592	2.84918	3.71166	3.85366	8	3
Hist3h2a	116.114	118.74	125.051	164.865	204.822	272.912	372.087	400.394	0.0322641	0.106975	0.505743	0.818829	1.23289	1.6801	1.78588	8	3
Nlrp3	137.674	78.0521	100.301	159.404	277.918	270.302	346.375	393.029	-0.818747	-0.45692	0.211432	1.0134	0.973316	1.33108	1.51338	8	3
Kif1c	6.06412	7.63707	9.36037	9.41962	10.8235	11.0314	10.5765	12.3794	0.332721	0.626267	0.635371	0.835797	0.863246	0.802492	1.02957	8	3
Blmh	3.20498	4.23039	4.77151	5.74666	7.83544	7.30857	11.24	14.3672	0.400475	0.574131	0.842408	1.2897	1.18927	1.81025	2.16439	8	3
Tob1	2.38979	4.44118	3.66095	3.9534	5.69097	8.15756	11.3987	11.6828	0.894059	0.615334	0.72621	1.25179	1.77125	2.25391	2.28943	8	3
Zfp652	5.27758	8.79438	6.54758	7.63783	6.86274	8.97193	10.3804	11.0385	0.736705	0.311085	0.533286	0.378908	0.765542	0.975914	1.0646	8	3
Drg1	458.549	438.822	411.223	367.295	339.599	338.615	259.1	209.843	-0.0634401	-0.157155	-0.320137	-0.433244	-0.43743	-0.823567	-1.12777	8	3
Ccl5	23.7177	19.7829	26.5357	30.573	31.1089	26.5083	13.5053	10.2826	-0.26171	0.16197	0.366294	0.391363	0.16048	-0.812438	-1.20576	8	3
