# Supplementary material for: Linking Transcriptional Changes over Time in Stimulated Dendritic Cells to Identify Gene Networks Activated during the Innate Immune Response
Source: PLoS Comput Biol. 2013 Nov 7;9(11):e1003323. doi: 10.1371/journal.pcbi.1003323 (PMC3820512; doi:10.1371/journal.pcbi.1003323)
Supplement: Table S17 — Genes showing greater than two-fold change in expression in TRIF-knockout dendritic cells between 0.5–8 hours after LPS stimulation. (XLSX) [file pcbi.1003323.s025.xlsx]

## Sheet: TRIF knockout gene groups
Supporting Table S17. Genes showing greater than two-fold change in expression in TRIF knockout DCs between 0.5 - 8 hours after LPS stimulation
Gene name	Unstimulated (0 hours)	Expression on LPS stimulation (FPKM)							Log fold change in expression							Time of expression	Time group
		0.5	1	2	3	4	6	8	0.5	1	2	3	4	6	8
Cxcr7	12.0638	30.5323	24.3805	5.88458	2.19906	2.44146	5.04807	6.83232	1.33965	1.01504	-1.03567	-2.45573	-2.30487	-1.25688	-0.820237	0.5	1
Rgs1	74.8016	457.07	377.143	226.241	84.7336	51.282	25.5022	22.451	2.61127	2.33397	1.59672	0.179865	-0.544617	-1.55245	-1.73629	0.5	1
Egr2	61.6975	123.857	53.4138	13.7101	27.3474	40.3528	47.5704	46.5645	1.00539	-0.208	-2.16997	-1.17381	-0.612543	-0.375148	-0.405982	0.5	1
Fos	32.1486	305.825	31.6263	4.15688	4.97149	9.75959	20.2975	27.7015	3.24988	-0.0236311	-2.95118	-2.69301	-1.71986	-0.663454	-0.214792	0.5	1
Hist1h1c	73.6099	226.952	159.759	109.176	30.5362	29.4789	39.3403	64.4348	1.62442	1.11793	0.568684	-1.26938	-1.32022	-0.903892	-0.19206	0.5	1
Map3k1	16.4783	34.5294	22.2413	7.99044	8.29696	7.99687	11.1617	13.3275	1.06726	0.432674	-1.04422	-0.989913	-1.04306	-0.562011	-0.306161	0.5	1
Egr1	12.1332	819.346	250.54	21.6079	9.28105	7.56818	5.10943	4.82497	6.07744	4.36801	0.832599	-0.3866	-0.680942	-1.24773	-1.33037	0.5	1
Adrb2	6.9118	29.9697	21.7913	6.29179	2.82478	3.25964	3.61197	4.78845	2.11637	1.65662	-0.135591	-1.29092	-1.08435	-0.936276	-0.529503	0.5	1
Phf21a	8.32716	17.2687	15.5037	4.09912	2.54874	2.59162	4.58279	6.8679	1.05226	0.896716	-1.02251	-1.70804	-1.68397	-0.861598	-0.277956	0.5	1
Selenbp1	37.8207	94.7949	94.6249	54.8456	25.5858	13.9597	14.9791	30.0423	1.32563	1.32304	0.5362	-0.563833	-1.43791	-1.33623	-0.332181	0.5	1
Atg4c	9.52522	19.7055	18.8284	6.59528	3.97868	5.3264	8.51271	9.80317	1.04877	0.983086	-0.530319	-1.25946	-0.838592	-0.162134	0.0414959	0.5	1
Id3	17.2558	45.7196	37.5163	24.1209	11.1834	8.09884	10.0271	11.6645	1.40573	1.12044	0.483202	-0.625722	-1.09129	-0.783177	-0.564957	0.5	1
Tnfrsf18	5.47881	13.5469	10.8194	5.90889	2.07229	2.04677	2.68787	4.31504	1.30603	0.981686	0.109025	-1.40264	-1.42051	-1.0274	-0.344489	0.5	1
Jun	48.969	128.031	40.7266	20.9401	32.4949	28.2324	43.5997	46.871	1.38655	-0.265897	-1.2256	-0.591655	-0.794517	-0.167551	-0.0631732	0.5	1
Cenpa	7.96717	28.9326	24.1274	19.4225	8.29731	4.52745	2.73734	3.18356	1.86056	1.59853	1.28559	0.0585763	-0.815369	-1.54129	-1.32343	0.5	1
Hopx	25.2354	53.3229	50.8342	36.8601	18.9973	13.8546	12.0367	21.7079	1.07931	1.01035	0.546611	-0.409655	-0.865084	-1.06801	-0.217229	0.5	1
Slc2a3	16.1283	84.3989	71.82	27.503	8.40723	7.02999	7.63722	11.4363	2.38763	2.15479	0.769995	-0.939892	-1.198	-1.07847	-0.495974	0.5	1
Dedd2	8.98153	24.5912	14.1519	8.60559	6.84011	4.44396	5.20559	6.65981	1.45311	0.655963	-0.0616871	-0.392942	-1.01512	-0.7869	-0.43148	0.5	1
Ppp1r3b	12.0387	31.9142	11.501	2.26686	5.40252	5.78219	10.2202	12.6168	1.40652	-0.0659203	-2.40891	-1.15598	-1.05799	-0.236256	0.0676664	0.5	1
Klf2	10.9813	32.3157	26.2968	7.84438	4.4199	4.96072	6.71112	8.9118	1.55719	1.25984	-0.485318	-1.31296	-1.14643	-0.710423	-0.30126	0.5	1
Fbxo31	8.20885	18.6591	12.6808	3.17672	3.7664	5.36706	5.66743	7.61323	1.18463	0.627394	-1.36964	-1.12399	-0.613048	-0.534485	-0.108671	0.5	1
Ngfrap1	7.94794	16.0082	14.9467	12.9091	8.92425	7.20629	4.88154	3.6877	1.01016	0.911174	0.699736	0.16715	-0.141324	-0.703245	-1.10786	0.5	1
Zfp395	8.76083	21.5547	16.7612	1.85889	0.922369	0.992272	3.17544	5.17835	1.29886	0.935986	-2.23663	-3.24765	-3.14226	-1.46411	-0.758575	0.5	1
Kif21b	7.17232	19.1973	14.3496	6.18776	3.91226	3.92174	5.69892	6.15656	1.42039	1.0005	-0.213023	-0.874438	-0.870946	-0.331751	-0.220315	0.5	1
Btg2	24.1474	200.605	60.1142	23.2134	14.7009	14.204	20.0766	23.3851	3.05442	1.31584	-0.05691	-0.715963	-0.765571	-0.266353	-0.0462783	0.5	1
Sgk1	87.606	321.992	287.16	90.3326	83.9508	82.2029	127.529	117.996	1.87792	1.71275	0.0442171	-0.0614856	-0.0918404	0.541724	0.429636	0.5	1
Phlda1	32.8899	390.077	253.398	135.927	192.515	149.066	77.8667	63.668	3.56804	2.94569	2.04712	2.54925	2.18023	1.24336	0.952924	0.5	1
Osm	4.92116	58.7912	31.0649	13.7103	7.24372	7.21808	6.66621	5.83433	3.57853	2.65822	1.47819	0.557732	0.552617	0.437868	0.245569	0.5	1
Uba52	387.843	892.57	406.535	456.79	451.357	429.002	406.662	368.815	1.20249	0.0679068	0.236058	0.218796	0.145512	0.0683574	-0.0725754	0.5	1
Trim25	30.0292	83.6814	66.987	21.6043	25.1081	30.3808	26.294	25.3255	1.47854	1.15752	-0.475048	-0.258213	0.0167938	-0.191632	-0.245775	0.5	1
Npepps	42.7603	99.4595	91.16	64.2918	52.7402	47.8302	44.8238	41.9809	1.21784	1.09213	0.588363	0.302631	0.16165	0.067993	-0.0265389	0.5	1
Wipi1	8.13143	16.7407	16.4889	11.5632	8.26291	8.43368	10.5976	14.3626	1.04178	1.01991	0.50796	0.0231409	0.0526532	0.382157	0.820736	0.5	1
Nfkbia	96.4958	1405.72	1149.19	725.089	489.137	339.789	276.013	234.137	3.8647	3.57401	2.90962	2.3417	1.8161	1.5162	1.27881	0.5	1
Plk2	37.3549	151.827	110.684	79.9451	67.3058	54.1845	28.8964	19.6938	2.02306	1.56708	1.09771	0.849433	0.536583	-0.370408	-0.923556	0.5	1
Nfil3	43.8024	167.889	97.5696	25.6676	32.0505	42.2419	49.9356	57.4225	1.93843	1.15542	-0.771062	-0.450663	-0.0523352	0.189059	0.390606	0.5	1
Zfp622	8.85681	22.493	22.0646	18.0766	13.6492	10.3862	9.24576	8.51093	1.34462	1.31687	1.02926	0.623957	0.229809	0.0620047	-0.0574704	0.5	1
Trib1	8.19701	52.1834	29.4046	10.0818	9.88346	12.1488	9.76176	8.37484	2.67042	1.84287	0.298584	0.269918	0.567644	0.252044	0.0309639	0.5	1
Eif4a2	84.0734	196.083	171.392	139.688	87.1666	77.8287	75.9413	76.6656	1.22174	1.02758	0.732487	0.052126	-0.111347	-0.146765	-0.13307	0.5	1
H2-Oa	8.04401	17.6361	14.801	13.5214	9.20027	9.57703	6.38302	5.25728	1.13254	0.879708	0.749258	0.193761	0.251663	-0.333676	-0.613598	0.5	1
Ier3	139.641	910.318	526.586	360.264	284.346	205.129	229.128	237.58	2.70465	1.91495	1.36733	1.02592	0.554809	0.714431	0.766691	0.5	1
Dusp1	28.3557	490.743	216.583	50.6175	39.5519	40.9137	40.6235	35.602	4.11326	2.93321	0.835997	0.480108	0.528945	0.518676	0.32832	0.5	1
Vegfa	208.354	574.917	440.562	167.515	158.441	139.611	149.468	173.351	1.46432	1.08031	-0.314747	-0.395091	-0.577624	-0.4792	-0.265341	0.5	1
Pmaip1	6.32394	29.3188	27.5326	11.2768	4.50593	4.32242	5.47281	4.56173	2.21293	2.12225	0.834462	-0.488999	-0.548984	-0.208542	-0.471243	0.5	1
Afg3l2	32.9851	72.6633	70.9906	48.8261	36.5218	46.2086	45.4598	36.8372	1.13941	1.10581	0.565838	0.146943	0.486347	0.462777	0.159349	0.5	1
Dusp5	16.8964	117.967	81.7619	27.8323	16.5013	14.496	10.2395	9.28681	2.8036	2.27471	0.720044	-0.0341362	-0.221061	-0.722571	-0.863461	0.5	1
Got1	24.1199	54.9578	47.6338	36.7613	17.6764	13.9247	12.2783	15.0456	1.1881	0.981762	0.607964	-0.448399	-0.792578	-0.974113	-0.680882	0.5	1
Cir1	10.2282	21.3825	15.7758	9.56025	7.20639	7.20876	6.96552	10.0913	1.06388	0.625161	-0.097432	-0.505204	-0.504729	-0.554249	-0.0194402	0.5	1
Vps39	10.9299	25.2087	20.5402	10.7201	8.65486	8.71688	9.55889	9.88861	1.20564	0.91017	-0.0279618	-0.336698	-0.326396	-0.193365	-0.144441	0.5	1
Trib3	4.99289	13.0026	10.7337	11.5518	8.37707	6.57063	4.50303	4.04775	1.38085	1.1042	1.21017	0.746571	0.396157	-0.148979	-0.302755	0.5	1
Tiparp	18.9876	71.9602	53.924	29.9316	35.8765	33.0564	24.058	20.9085	1.92214	1.50587	0.656612	0.917982	0.799872	0.341459	0.139032	0.5	1
Smc4	10.5324	21.4766	16.7219	10.1178	6.55677	6.01543	8.51943	10.4154	1.02793	0.666905	-0.0579386	-0.683777	-0.808094	-0.306005	-0.016116	0.5	1
F3	15.7759	57.8579	50.6094	16.2737	14.0713	14.329	15.5868	11.7315	1.87479	1.68168	0.04482	-0.164967	-0.138784	-0.0173975	-0.427335	0.5	1
Ccnl1	41.4666	151.786	142.821	92.5936	70.9426	59.0114	42.1928	40.5851	1.87202	1.78419	1.15896	0.774702	0.509044	0.0250471	-0.0309996	0.5	1
Fosl2	36.409	107.868	90.1724	40.1597	42.3995	36.9254	38.3429	42.7767	1.5669	1.30839	0.141453	0.219752	0.0203184	0.0746643	0.23253	0.5	1
Gadd45a	27.6998	292.955	238.944	108.741	80.959	52.3806	25.3988	19.7989	3.40273	3.10873	1.97295	1.54732	0.919157	-0.125115	-0.484455	0.5	1
Mxd1	8.77286	39.3983	37.7569	24.6465	10.5742	7.18017	6.58524	7.11884	2.16701	2.10562	1.49026	0.269429	-0.289029	-0.413811	-0.301405	0.5	1
Nfkbid	21.8743	61.4056	56.9959	29.3807	21.4289	16.5165	20.0128	23.7662	1.48913	1.38162	0.425632	-0.0296791	-0.405329	-0.128314	0.119674	0.5	1
Adm	4.14212	10.2662	10.1031	6.83414	4.28682	4.47081	4.38497	4.65709	1.30946	1.28636	0.72239	0.0495385	0.110167	0.0821976	0.169059	0.5	1
Zfp36	61.3284	724.856	174.512	59.0364	92.7249	103.653	95.93	88.6525	3.56307	1.5087	-0.0549506	0.596401	0.757135	0.645427	0.531606	0.5	1
Gpi1	750.489	2136.5	2061.14	1564.63	890.823	709.427	563.029	613.485	1.50935	1.45754	1.05992	0.247308	-0.0811767	-0.414622	-0.290803	0.5	1
Ppp1r15a	13.7119	140.478	99.9129	50.4461	30.4711	22.3983	15.4293	14.1451	3.35684	2.86524	1.87931	1.15201	0.707961	0.170244	0.0448739	0.5	1
Nupr1	6.2291	25.7281	25.0977	25.3757	15.6994	17.7038	15.92	14.6571	2.04625	2.01046	2.02635	1.33361	1.50696	1.35374	1.2345	0.5	1
Ell	20.1798	60.5151	35.8549	14.1458	15.5117	16.7218	15.3843	16.9077	1.58438	0.829258	-0.512538	-0.379555	-0.271182	-0.391453	-0.255231	0.5	1
Junb	95.4467	757.197	506.955	203.281	153.373	94.0678	85.013	101.889	2.9879	2.40909	1.09071	0.684277	-0.0209944	-0.167012	0.0942311	0.5	1
Il10ra	25.2454	58.4586	55.8085	44.9068	32.2385	24.9181	32.2614	34.6733	1.21139	1.14446	0.830913	0.352764	-0.0188265	0.353789	0.457805	0.5	1
Csrnp1	4.70203	87.2871	68.7552	13.0402	7.70674	7.32573	6.20714	6.49576	4.21441	3.87011	1.47161	0.712837	0.639689	0.400645	0.466215	0.5	1
Sat1	235.608	510.272	423.374	351.376	219.747	184.706	150.246	152.689	1.11488	0.845544	0.576627	-0.100545	-0.351158	-0.649062	-0.625792	0.5	1
Nr1d1	2.72919	15.4702	11.0069	4.97376	2.89027	3.30127	3.3386	3.37394	2.50295	2.01186	0.865864	0.0827314	0.274548	0.29077	0.305961	0.5	1
Nr4a1	2.45076	115.991	34.0041	4.27495	3.84587	2.46526	2.17317	4.17808	5.56464	3.79441	0.802678	0.650081	0.0085106	-0.173428	0.769611	0.5	1
Ly96	38.5859	15.4235	22.087	42.5353	56.1132	62.18	42.8848	30.4975	-1.32294	-0.804876	0.140587	0.540266	0.688377	0.152393	-0.339383	0.5	1
Imp4	20.2081	7.84873	10.9906	19.3528	29.2029	28.554	27.2819	21.3136	-1.3644	-0.878664	-0.0623914	0.531178	0.498759	0.43301	0.0768406	0.5	1
Ppa1	12.6528	5.62282	5.68283	10.1004	12.3894	12.2578	15.9833	16.5597	-1.17009	-1.15478	-0.325044	-0.0303504	-0.0457566	0.337109	0.38822	0.5	1
Snrpd3	132.587	54.6899	58.4064	87.1075	129.245	141.311	156.042	135.438	-1.27759	-1.18274	-0.60607	-0.0368309	0.0919344	0.234995	0.0306932	0.5	1
Psmc5	56.6927	27.4077	34.2253	52.4623	78.1786	81.9155	80.1664	70.3425	-1.04858	-0.7281	-0.111882	0.463611	0.530973	0.499835	0.311234	0.5	1
Pno1	24.8617	11.7232	14.9709	26.6316	35.0712	38.0299	36.6307	30.516	-1.08456	-0.731764	0.0992142	0.496362	0.613209	0.559128	0.295641	0.5	1
Ubtf	24.6536	11.9003	12.8109	22.592	33.1382	30.8085	27.1531	23.1155	-1.0508	-0.944426	-0.125986	0.426697	0.32153	0.139319	-0.0929378	0.5	1
Eef1e1	18.1334	8.97291	11.4311	21.8966	25.3428	27.8098	25.8789	21.7554	-1.015	-0.665685	0.272057	0.482926	0.616944	0.513127	0.262724	0.5	1
Ptger2	13.3864	4.31817	6.75519	22.0474	20.9693	19.2697	17.0514	11.9617	-1.63228	-0.9867	0.719841	0.647511	0.525566	0.349122	-0.162346	0.5	1
Psmd6	49.5732	24.4603	29.5607	54.4325	68.8647	69.5578	64.614	55.6446	-1.01912	-0.74588	0.134908	0.474204	0.488652	0.382286	0.166681	0.5	1
Slc7a8	27.8485	11.7178	25.0889	37.8379	46.9182	42.4639	42.8722	36.3833	-1.2489	-0.15055	0.442232	0.752548	0.608637	0.622443	0.385677	0.5	1
Polr2k	69.9926	34.6325	39.1068	50.0441	57.4734	57.2597	70.1603	62.6359	-1.01508	-0.839783	-0.484002	-0.284308	-0.289682	0.00345252	-0.160213	0.5	1
Bop1	17.7399	7.08955	12.9899	19.1862	23.0005	23.1523	24.6866	21.2936	-1.32323	-0.449608	0.113071	0.374667	0.384158	0.47673	0.263422	0.5	1
Ncbp2	16.5163	5.53423	8.07827	8.97812	13.02	14.564	17.9537	16.9084	-1.57744	-1.03177	-0.879405	-0.343161	-0.181484	0.120391	0.0338496	0.5	1
Ranbp1	71.5329	26.4568	30.8498	54.8438	75.89	82.3155	83.9945	75.2083	-1.43497	-1.21335	-0.383278	0.0853029	0.202557	0.231688	0.072285	0.5	1
Thoc6	14.8274	4.90068	6.26817	8.30543	10.3767	12.4058	14.4227	12.9702	-1.59721	-1.24215	-0.836139	-0.514918	-0.257251	-0.0399244	-0.193065	0.5	1
Tbl3	12.0454	4.46995	5.16592	7.82862	11.173	12.2105	15.6308	13.6751	-1.43015	-1.22139	-0.621652	-0.108466	0.01964	0.375909	0.183069	0.5	1
Hnrnpm	75.0955	34.9969	53.0113	84.9932	113.413	96.5534	73.802	65.6969	-1.1015	-0.502427	0.178621	0.594788	0.362601	-0.0250665	-0.192901	0.5	1
Cyb5	470.134	209.367	242.402	309.668	389.173	472.492	515.014	543.009	-1.16704	-0.95567	-0.60235	-0.27266	0.00721788	0.13154	0.207904	0.5	1
Ino80c	9.94957	4.17138	5.09368	7.37908	9.69518	12.0726	11.4317	10.9046	-1.25411	-0.965926	-0.431193	-0.0373665	0.27903	0.200334	0.132231	0.5	1
Ms4a7	16.7073	6.94379	8.58727	15.1244	20.967	22.1351	25.5443	24.4175	-1.26668	-0.960207	-0.143601	0.327642	0.405857	0.612523	0.547437	0.5	1
Exosc1	11.2519	4.42147	5.01155	6.00557	9.7233	9.37728	11.397	10.962	-1.34757	-1.16684	-0.905796	-0.210651	-0.262927	0.0184855	-0.0376576	0.5	1
Timm10	28.3533	11.6194	15.5588	24.7934	32.4133	34.0815	33.7655	25.8095	-1.28698	-0.865786	-0.193561	0.193069	0.265472	0.252033	-0.135614	0.5	1
Aven	10.8596	3.57004	4.03026	5.31647	9.84593	9.06973	11.4954	10.8257	-1.60496	-1.43003	-1.03043	-0.141372	-0.259839	0.0820857	-0.00451065	0.5	1
Ywhab	82.9709	37.5708	43.2979	69.1709	94.9758	94.4795	95.5458	84.2175	-1.14299	-0.938308	-0.26244	0.194955	0.187396	0.203587	0.0215146	0.5	1
Trmt6	8.02755	3.35091	4.64272	8.31961	11.989	12.2165	10.0966	7.79797	-1.26041	-0.789989	0.0515562	0.57868	0.605799	0.330838	-0.0418611	0.5	1
Pdrg1	27.0103	10.3543	11.9685	14.2569	21.3409	22.3924	27.8261	26.3981	-1.38328	-1.17427	-0.921849	-0.339889	-0.270501	0.0429291	-0.0330756	0.5	1
2810408M09Rik	10.666	4.80816	5.7581	9.23426	12.6233	12.3969	12.0756	10.2031	-1.14946	-0.889354	-0.207951	0.24307	0.21696	0.179076	-0.0640117	0.5	1
Exosc9	9.74076	4.3119	5.02177	8.47626	10.7102	11.4237	11.6099	12.1852	-1.17571	-0.955838	-0.200606	0.136879	0.229924	0.253249	0.323024	0.5	1
Cd1d1	10.3814	5.09891	5.61521	5.3257	7.98995	8.61266	11.9793	14.4276	-1.02574	-0.886589	-0.962958	-0.377743	-0.26947	0.206543	0.47483	0.5	1
Cd1d1	47.0069	20.6862	25.0845	22.0657	28.8903	37.9665	48.5344	57.053	-1.1842	-0.906076	-1.09107	-0.702287	-0.308146	0.0461351	0.27943	0.5	1
Gar1	15.7675	5.97488	8.00069	16.2028	18.813	21.0944	18.187	13.6157	-1.39997	-0.978758	0.0392892	0.254776	0.419906	0.205954	-0.211683	0.5	1
Ebna1bp2	13.4001	6.04339	7.41382	12.5531	16.9947	16.6426	16.1204	13.437	-1.14881	-0.853955	-0.0942001	0.342841	0.312637	0.266644	0.00396731	0.5	1
Dnajc11	13.1881	6.36042	8.63769	14.748	18.9805	18.3634	15.367	13.1864	-1.05204	-0.610519	0.161283	0.525281	0.477596	0.220599	-0.000185981	0.5	1
Sigmar1	31.8714	13.5145	13.7268	13.8472	18.4659	18.3998	29.9354	30.9077	-1.23775	-1.21527	-1.20267	-0.787399	-0.792572	-0.0904098	-0.0442961	0.5	1
Atad3a	11.5488	5.31442	6.63059	10.0129	14.076	15.4327	14.9075	11.8658	-1.11976	-0.800534	-0.205883	0.285494	0.418248	0.368295	0.0390664	0.5	1
Lyar	10.3231	5.14692	6.44998	7.69665	10.6499	11.1477	10.8526	10.4984	-1.0041	-0.67851	-0.423574	0.0449636	0.11087	0.0721644	0.0242932	0.5	1
Ran	92.45	46.1774	57.0918	104.073	131.868	135.599	123.574	106.782	-1.00149	-0.69539	0.170851	0.512349	0.552601	0.41863	0.207923	0.5	1
Dynll1	63.1149	31.4158	37.2054	43.9448	50.7388	49.948	63.416	63.1867	-1.00649	-0.762469	-0.522288	-0.314891	-0.337554	0.00686625	0.00164029	0.5	1
Wbscr22	17.8477	8.37713	8.60484	10.9674	15.1935	15.1208	16.3692	16.4121	-1.09121	-1.05252	-0.702517	-0.232284	-0.239204	-0.124754	-0.120978	0.5	1
Npy	52.0566	23.8573	26.17	35.6771	30.036	28.4972	28.5109	25.3765	-1.12565	-0.992167	-0.545083	-0.793388	-0.869261	-0.868568	-1.03659	0.5	1
Ruvbl1	15.0818	7.19331	7.86126	12.9563	16.2152	16.3615	17.3042	14.179	-1.06808	-0.939976	-0.219155	0.104538	0.117496	0.198314	-0.0890528	0.5	1
Pole4	20.1833	9.14719	12.6151	16.4892	19.8248	21.0244	24.3636	22.7202	-1.14176	-0.67801	-0.291641	-0.0258558	0.0589026	0.271565	0.170813	0.5	1
Bccip	29.5528	13.3532	14.0236	20.2949	28.4378	32.3311	33.7677	30.0889	-1.14611	-1.07544	-0.542178	-0.055485	0.129628	0.192349	0.0259365	0.5	1
Hspbp1	17.3095	8.03806	8.46417	11.3211	12.3243	12.2053	15.0775	16.4708	-1.10664	-1.03212	-0.61255	-0.490058	-0.504056	-0.199167	-0.0716534	0.5	1
Psmc4	55.4516	27.4232	32.0604	52.8136	68.8122	76.0426	74.0097	66.3613	-1.01583	-0.790437	-0.0703196	0.311435	0.455579	0.416485	0.259113	0.5	1
Ptger1	12.5312	5.49538	8.03159	7.84423	10.7419	10.3983	9.51806	10.832	-1.18923	-0.641767	-0.675821	-0.222275	-0.269177	-0.396785	-0.210225	0.5	1
Ddx39	34.2044	10.799	12.8885	25.7764	41.176	44.2573	47.515	41.3235	-1.66328	-1.4081	-0.408131	0.267622	0.371734	0.474201	0.272781	0.5	1
Nqo1	51.2303	22.8745	27.3881	33.4971	40.8473	53.7318	72.8297	89.0616	-1.16326	-0.903448	-0.612961	-0.326757	0.0687788	0.50753	0.797806	0.5	1
Snapc5	27.9336	11.5302	14.505	18.1307	26.0498	26.5849	30.7291	33.3105	-1.27658	-0.945451	-0.623567	-0.100729	-0.0713945	0.137604	0.253975	0.5	1
Mrpl3	14.9519	7.42573	8.61617	16.731	19.4715	18.0627	16.5661	14.3603	-1.00972	-0.79521	0.162195	0.381035	0.272685	0.147905	-0.0582429	0.5	1
Rexo2	56.013	23.626	26.4475	35.7946	41.2687	46.8938	53.8591	57.1166	-1.24539	-1.08263	-0.64602	-0.440714	-0.256365	-0.0565716	0.0281484	0.5	1
Ikbkg	21.2242	10.3974	13.0221	21.6129	32.6586	37.7845	34.5287	26.1164	-1.02949	-0.704748	0.0261825	0.621753	0.832084	0.702086	0.299246	0.5	1
Trappc2	8.63488	4.05415	5.21854	6.34327	7.62829	8.65474	10.6507	11.385	-1.09078	-0.72653	-0.444949	-0.178816	0.00331435	0.3027	0.398886	0.5	1
Nme6	6.42996	3.00861	3.51948	8.16582	9.92545	11.6437	12.8382	11.465	-1.09571	-0.869447	0.344788	0.626323	0.856668	0.997561	0.834355	0.5	1
Tob1	8.39496	21.6795	27.689	11.3213	5.58195	4.17922	4.83378	4.8024	1.36874	1.72172	0.431444	-0.588754	-1.00629	-0.796372	-0.805768	1	1
Hist1h2bk	5.93464	10.2747	12.6068	10.9987	7.49386	5.89627	2.76575	5.21001	0.791864	1.08697	0.890101	0.336549	-0.00935793	-1.10149	-0.187874	1	1
Cytip	21.1459	45.8693	46.072	19.3027	9.84907	10.6545	11.509	13.1397	1.11715	1.12351	-0.131575	-1.10232	-0.988915	-0.877615	-0.686446	1	1
Selenbp2	11.6382	27.4203	28.514	15.7432	7.67633	4.39224	4.48649	9.32998	1.23638	1.2928	0.435861	-0.600379	-1.40584	-1.37521	-0.318922	1	1
Enc1	6.0689	7.56614	18.2134	11.5774	3.94271	2.08773	2.10096	2.06818	0.318122	1.58549	0.931804	-0.622247	-1.5395	-1.53039	-1.55307	1	1
Gab1	7.30472	10.429	20.0396	2.94921	1.94518	3.02022	6.45662	7.66129	0.5137	1.45595	-1.3085	-1.90893	-1.27418	-0.17805	0.0687584	1	1
Hbegf	5.18016	11.5364	13.4473	4.00733	3.31893	3.24137	2.15619	1.70957	1.15512	1.37625	-0.370355	-0.642278	-0.676393	-1.26451	-1.59936	1	1
Klf4	4.0535	18.0445	21.1283	6.6687	2.55839	2.29389	1.85129	2.60388	2.15432	2.38194	0.718237	-0.663932	-0.821372	-1.13064	-0.638505	1	1
Il1r2	15.5967	83.5834	93.7519	79.009	42.6034	27.9771	11.2954	10.7422	2.42198	2.58761	2.34078	1.44973	0.843006	-0.465505	-0.537951	1	1
Cflar	13.076	33.5791	109.416	102.594	63.054	41.9707	30.7751	26.2411	1.36064	3.06483	2.97195	2.26967	1.68246	1.23484	1.00491	1	1
Sp140	15.5052	32.0892	34.1151	24.6873	16.7079	15.1213	14.0888	15.5781	1.04934	1.13766	0.671017	0.107778	-0.03617	-0.138203	0.00676715	1	1
Aim2	14.4782	31.0806	32.5086	16.0404	10.522	11.6214	11.6506	11.3923	1.10213	1.16694	0.147828	-0.460473	-0.317098	-0.313478	-0.345823	1	1
Uap1	10.3321	13.1814	22.5614	19.6613	12.2626	10.4956	9.54846	10.967	0.35137	1.12672	0.928225	0.247131	0.0226511	-0.113794	0.0860354	1	1
H3f3b	271.091	492.163	578.465	388.561	304.509	300.132	266.142	261.58	0.860359	1.09345	0.519364	0.167708	0.14682	-0.026581	-0.051525	1	1
Ephx1	16.623	34.8661	35.4333	30.8917	24.1421	20.9805	13.2379	12.6283	1.06864	1.09193	0.894038	0.53837	0.335868	-0.328506	-0.39652	1	1
Katna1	16.6802	19.9108	34.1464	25.4406	21.5684	21.2063	17.7154	17.304	0.255415	1.0336	0.608996	0.370783	0.346356	0.0868675	0.052969	1	1
Cited2	29.4071	170.144	198.569	39.8206	26.8235	20.0848	19.1733	17.7916	2.53252	2.7554	0.43735	-0.132667	-0.55006	-0.617066	-0.724968	1	1
Dot1l	6.94026	11.4491	18.0225	8.5803	9.85495	10.0195	9.43826	8.26279	0.722173	1.37674	0.306038	0.505859	0.529749	0.443531	0.251639	1	1
Atp2b1	21.6612	37.9313	50.5244	31.9938	20.5078	20.7599	17.0968	15.7329	0.808276	1.22187	0.562679	-0.0789404	-0.0613137	-0.341387	-0.461329	1	1
Ppp1r12a	11.0414	19.3954	25.6726	18.1853	17.5117	14.5635	13.1804	12.2367	0.812791	1.21731	0.71985	0.665396	0.399434	0.255471	0.148291	1	1
Csrp2	4.04427	11.1136	19.4205	15.4096	8.32135	6.38704	4.16358	5.04158	1.45837	2.26363	1.92988	1.04094	0.659268	0.0419452	0.317997	1	1
Sash1	5.76996	6.06693	14.9286	13.4222	10.0373	8.6576	9.79891	11.4228	0.0724053	1.37145	1.21799	0.798738	0.585406	0.76406	0.985283	1	1
Tnfaip3	22.0829	321.056	458.966	260.805	124.446	84.4622	51.6883	37.297	3.86182	4.37739	3.56197	2.49452	1.93538	1.22691	0.75613	1	1
Prdm1	5.03073	19.4689	31.6489	8.02323	4.59806	5.28248	6.33232	5.64123	1.95233	2.65332	0.673415	-0.129742	0.0704476	0.331966	0.165242	1	1
Sirt1	5.64493	10.0975	20.9774	15.6839	10.4797	7.7856	5.76529	5.10055	0.838971	1.89381	1.47426	0.89257	0.463853	0.0304375	-0.146303	1	1
Tbc1d15	13.683	28.8507	36.3036	29.6595	18.4739	15.3356	11.7133	11.9009	1.07622	1.40773	1.11611	0.433104	0.1645	-0.224237	-0.201314	1	1
Mdm2	45.754	110.976	276.371	155.292	90.6393	74.7042	54.9507	44.6619	1.27828	2.59464	1.76301	0.986239	0.707291	0.26424	-0.0348532	1	1
Dyrk2	5.78424	10.5922	18.8219	17.8289	13.1435	9.66339	8.95465	7.62701	0.872803	1.70221	1.62402	1.18415	0.740402	0.63051	0.39899	1	1
Tbk1	20.4381	26.3716	43.571	39.5102	32.2868	30.8417	25.5159	24.5538	0.367724	1.09211	0.950964	0.659683	0.593621	0.320135	0.264685	1	1
Sertad2	12.5461	17.8269	27.6686	26.3476	17.0582	13.2779	10.7353	9.21768	0.506817	1.14101	1.07043	0.443226	0.081788	-0.224876	-0.444763	1	1
Peli1	7.03142	7.96817	14.6375	10.4974	8.93351	8.21049	7.0525	6.88232	0.180432	1.05778	0.578144	0.345411	0.223652	0.00431869	-0.0309211	1	1
Irf1	20.5865	88.6426	107.716	34.5891	23.6028	17.6975	17.0773	20.4247	2.1063	2.38746	0.748619	0.197259	-0.218153	-0.269619	-0.0113837	1	1
Fnip1	7.54419	18.9644	29.9773	23.941	16.9303	13.6797	9.10349	7.37179	1.32986	1.99043	1.66605	1.16617	0.858599	0.271054	-0.033351	1	1
Nlrp3	25.1857	115.694	316.62	240.565	162.528	105.95	57.4063	42.09	2.19964	3.65208	3.25575	2.69001	2.07271	1.1886	0.740873	1	1
Hexim1	14.7585	30.8542	45.1666	19.5601	14.2783	13.1835	16.1285	20.5488	1.06392	1.61371	0.406368	-0.0477219	-0.162813	0.128066	0.477508	1	1
Gna13	26.4568	52.336	69.0317	55.1518	30.9719	26.8945	27.6768	26.9491	0.984165	1.38362	1.05977	0.227321	0.0236726	0.0650386	0.0265985	1	1
Rel	3.16943	14.0531	41.2047	33.1229	17.0356	10.3322	6.32327	4.85663	2.14859	3.70051	3.38553	2.42626	1.70485	0.996447	0.615732	1	1
Ltc4s	8.18872	19.0801	20.7279	11.4169	10.5977	9.75453	7.32664	7.77323	1.22036	1.33986	0.479461	0.372041	0.252434	-0.160486	-0.0751238	1	1
Sec24a	4.43503	8.21397	10.9456	10.1399	7.30911	6.22001	5.35269	4.94992	0.889136	1.30334	1.19303	0.720752	0.487973	0.27132	0.158461	1	1
Flcn	20.1259	29.0717	42.9239	33.8075	26.1893	20.7161	16.7056	15.9264	0.530562	1.09273	0.74829	0.379924	0.0416991	-0.268722	-0.337633	1	1
Kdm6b	7.56868	25.297	57.3625	22.5672	15.6276	9.37086	8.84907	10.0981	1.74085	2.92199	1.57611	1.04598	0.30814	0.225484	0.41597	1	1
Wsb1	55.0022	101.579	180.454	135.898	99.5469	78.8013	55.4311	48.3528	0.885041	1.71407	1.30496	0.855887	0.51873	0.0112063	-0.18589	1	1
Rffl	9.04557	11.4414	25.1574	23.2755	16.6803	16.5814	15.1167	13.3344	0.33898	1.4757	1.36353	0.882862	0.874283	0.74086	0.55987	1	1
Cdc42ep4	7.28416	9.25413	23.7307	14.9305	6.11561	5.05972	6.16588	8.07801	0.345335	1.70392	1.03543	-0.252266	-0.525705	-0.240456	0.149237	1	1
Socs3	3.33789	90.0585	180.032	120.255	139.978	115.254	88.4023	72.1781	4.75385	5.75317	5.17102	5.39012	5.10974	4.72708	4.43455	1	1
Cyth1	23.6968	44.4889	60.4737	25.4465	18.8327	17.5189	17.3037	19.4664	0.908753	1.35162	0.102775	-0.331452	-0.43578	-0.453612	-0.283706	1	1
Rab10	8.21355	11.8533	16.9993	13.864	12.7457	11.0535	9.46317	8.91025	0.529211	1.0494	0.755266	0.633933	0.428425	0.204318	0.11746	1	1
Arg2	9.0768	40.2556	101.259	92.2749	42.2453	24.5515	10.0823	6.54219	2.14893	3.47972	3.34568	2.21854	1.43556	0.151569	-0.47241	1	1
Hbp1	39.7498	56.4669	90.6561	88.8149	62.3212	56.2777	46.6203	46.6735	0.506458	1.18946	1.15985	0.648775	0.501616	0.230011	0.231656	1	1
Ifrd1	36.5745	175.871	200.065	111.038	73.2158	69.0778	46.566	41.5964	2.26561	2.45156	1.60214	1.00132	0.917384	0.348439	0.185621	1	1
Dnajb9	20.2475	56.3127	88.4628	82.5717	48.5966	33.8056	18.7263	20.07	1.47572	2.12733	2.0279	1.26311	0.739518	-0.112678	-0.0127032	1	1
Fbxo33	7.55111	10.855	15.2389	13.593	11.4815	11.6402	11.7565	11.6071	0.523599	1.013	0.848103	0.60455	0.624355	0.638698	0.620247	1	1
Zfp36l1	45.9209	132.116	141.524	48.6585	39.0475	38.1506	41.1908	48.2854	1.52458	1.62382	0.0835409	-0.233921	-0.267445	-0.156829	0.0724361	1	1
Klf6	46.3985	139.359	149.92	84.5346	61.3335	53.4306	38.2911	33.6862	1.58666	1.69204	0.865464	0.402597	0.203588	-0.277069	-0.46192	1	1
Irf4	4.36276	23.7089	41.7261	13.7212	7.57559	5.3742	3.71419	3.29706	2.44212	3.25764	1.65309	0.796117	0.300809	-0.232193	-0.404061	1	1
Ranbp9	22.0419	41.0988	44.1568	31.7205	25.0654	24.1805	21.7251	21.9056	0.898848	1.00239	0.525167	0.185449	0.133595	-0.0208858	-0.00894886	1	1
Pik3r1	6.82752	10.9785	33.3907	21.2624	12.325	9.45152	7.79535	6.61618	0.685247	2.29001	1.63887	0.852154	0.469185	0.191252	-0.0453632	1	1
Snx18	35.9406	70.1128	94.6323	82.3427	69.9839	63.5683	53.4912	51.1142	0.964063	1.39672	1.19603	0.961409	0.822693	0.573687	0.50811	1	1
Zmiz1	17.944	29.0813	35.9451	16.5561	25.1235	23.3067	21.4476	18.7046	0.69659	1.00229	-0.116139	0.485536	0.377243	0.257315	0.0598916	1	1
Nr1d2	3.88758	7.34697	11.287	11.2335	6.02924	4.81021	2.63866	2.98351	0.918277	1.53772	1.53086	0.633104	0.307228	-0.559067	-0.381862	1	1
Ero1l	184.372	652.929	717.677	663.382	393.755	308.904	201.25	211.767	1.82431	1.96072	1.84722	1.09468	0.744539	0.126369	0.199858	1	1
Rb1	10.8426	22.4824	26.6433	16.6488	7.99421	7.16153	9.89907	11.5854	1.05209	1.29706	0.618707	-0.439683	-0.598371	-0.131346	0.0955971	1	1
Mpst	12.6907	24.0974	27.917	23.4836	14.3182	10.9123	7.63296	9.52902	0.925106	1.13737	0.887882	0.174078	-0.217816	-0.733457	-0.413372	1	1
Maff	11.7224	80.7688	128.95	82.2262	39.0498	20.7276	12.9307	13.635	2.78453	3.45947	2.81033	1.73605	0.822285	0.141532	0.218047	1	1
Atf4	89.5257	284.647	304.856	265.607	164.661	138.862	94.516	89.4572	1.6688	1.76775	1.56892	0.879125	0.633278	0.0782567	-0.00110429	1	1
Pim3	14.7163	113.69	114.553	62.5029	44.0966	28.5295	20.3119	20.7769	2.94962	2.96053	2.08651	1.58325	0.955039	0.46491	0.497565	1	1
Rnf19a	11.1583	20.2794	36.5836	26.9316	18.7725	13.6054	11.159	11.3185	0.861898	1.71308	1.27118	0.750504	0.286062	9.05026e-05	0.0205655	1	1
Ndrg1	69.0922	226.923	236.24	167.849	83.0745	58.8687	42.762	56.472	1.71561	1.77366	1.28057	0.265883	-0.231022	-0.692194	-0.290987	1	1
Eif2c2	4.17017	10.74	11.9399	10.5184	9.00793	7.1897	5.94806	4.88078	1.36482	1.51761	1.33474	1.11109	0.785825	0.512313	0.227006	1	1
Itga5	27.1623	24.9665	60.0181	58.9993	55.9923	52.5782	59.0175	51.9156	-0.121612	1.14379	1.11909	1.04362	0.952859	1.11954	0.934562	1	1
Klhl24	5.50362	11.9171	14.4028	10.4667	7.2128	6.04615	5.55689	5.45356	1.11458	1.3879	0.927354	0.390179	0.135636	0.0138968	-0.0131826	1	1
Nfkbiz	4.80266	417.921	625.533	203.466	77.5882	41.6289	23.6092	19.0984	6.44325	7.02511	5.40481	4.01393	3.11568	2.29744	1.99155	1	1
Btg3	10.9281	18.7647	22.958	22.222	13.9384	14.0643	10.5438	11.6278	0.779979	1.07095	1.02395	0.351022	0.363995	-0.0516477	0.0895356	1	1
Chd1	7.43909	14.8654	28.8018	16.9541	11.3474	10.3205	9.50669	9.82472	0.99876	1.95296	1.18844	0.609164	0.472315	0.353817	0.40129	1	1
Cdkn1a	163.894	487.166	502.963	303.053	172.411	177.611	194.441	188.591	1.57165	1.61769	0.886807	0.0730888	0.115958	0.246569	0.202498	1	1
H2-Q7	16.9183	42.6751	49.7151	31.8945	31.6375	28.1339	22.7503	26.3973	1.33481	1.5551	0.914723	0.903051	0.733725	0.427301	0.641806	1	1
Ppp1r10	16.2045	42.6384	65.0122	42.0316	28.4999	24.1648	17.2858	13.4883	1.39576	2.00432	1.37508	0.814562	0.576513	0.0931929	-0.264686	1	1
Trem1	11.6901	58.6646	87.4229	49.7324	25.9347	15.9015	8.06187	7.74319	2.3272	2.90272	2.0889	1.1496	0.443876	-0.536101	-0.594287	1	1
Tnfsf9	13.1739	262.351	364.712	65.1476	23.0737	15.9972	14.1035	13.2776	4.31574	4.791	2.30603	0.808567	0.280137	0.0983707	0.0113119	1	1
Lpin2	8.57477	14.5577	20.7793	10.105	7.37893	8.10956	9.66824	9.42212	0.763613	1.27698	0.236899	-0.216686	-0.0804743	0.173155	0.135954	1	1
Foxn2	14.0858	14.4306	34.2231	32.3135	25.0777	19.4448	16.6415	14.3775	0.0348898	1.28073	1.1979	0.832164	0.465143	0.240544	0.0295713	1	1
Brd2	52.6599	97.8463	135.256	103.362	87.2236	75.2159	68.6896	64.3956	0.893813	1.36092	0.972929	0.728014	0.514333	0.383387	0.290257	1	1
Tnf	30.7605	1146.88	1273.22	826.155	347.973	212.173	170.949	125.763	5.22049	5.37126	4.74726	3.49982	2.78609	2.47442	2.03156	1	1
Tgif1	48.345	153.2	207.227	114.192	72.9721	61.1561	64.2939	60.4155	1.66398	2.09977	1.24002	0.593978	0.33913	0.411315	0.321552	1	1
Prkd3	9.82723	21.6859	37.1277	23.9072	10.3416	8.16105	8.38571	8.97902	1.1419	1.91764	1.28259	0.0736027	-0.26803	-0.228852	-0.130227	1	1
Atl2	6.01548	11.9546	14.4909	12.1371	7.58151	6.12229	5.46728	5.50632	0.990814	1.2684	1.01267	0.333805	0.0253915	-0.137857	-0.127591	1	1
Fbxo11	14.2714	19.3786	34.6509	31.1492	24.2427	18.2532	14.5825	14.6316	0.441337	1.27977	1.12607	0.764424	0.355023	0.0311112	0.0359607	1	1
Malt1	29.9586	64.505	134.238	115.248	95.9542	68.5093	54.3661	50.8209	1.10644	2.16375	1.9437	1.67938	1.19333	0.859737	0.762452	1	1
Crem	6.60888	16.0108	20.1908	14.5613	7.42398	6.12005	5.66892	4.89348	1.27657	1.61122	1.13966	0.167787	-0.110862	-0.221332	-0.433545	1	1
Map3k8	8.55533	26.013	27.0481	17.8657	15.6144	15.8565	15.2481	14.5684	1.60434	1.66063	1.0623	0.867982	0.890179	0.833734	0.767947	1	1
Apbb3	7.2982	16.2889	31.0109	10.7901	6.30411	6.15207	6.31198	7.10847	1.15828	2.08716	0.564096	-0.211248	-0.246469	-0.209448	-0.0380016	1	1
Nr3c1	10.8665	14.0014	21.8279	20.3203	18.4181	17.2956	14.8733	12.0334	0.365684	1.00629	0.903034	0.761237	0.670518	0.452837	0.147157	1	1
Fem1c	8.47259	22.7762	25.5843	13.3535	8.19842	7.0071	6.84486	6.28063	1.42665	1.59438	0.656343	-0.0474572	-0.273986	-0.307782	-0.431894	1	1
Ptpn2	16.0968	24.5866	35.572	34.4831	27.4444	27.1534	18.3668	19.6252	0.611098	1.14397	1.09912	0.769738	0.754359	0.190326	0.285933	1	1
Chka	11.0265	26.3929	56.576	29.7773	14.9249	11.8038	10.2817	11.1995	1.25917	2.35922	1.43324	0.436746	0.0982765	-0.100896	0.0224594	1	1
Atg2a	7.72792	13.811	18.2382	13.6734	10.6011	8.05189	6.80377	7.73795	0.837666	1.23881	0.82322	0.456062	0.0592473	-0.183746	0.00187125	1	1
Zfand5	35.7361	61.1039	73.3779	51.4559	49.8518	53.3748	42.9414	39.0274	0.773882	1.03796	0.525954	0.480263	0.578777	0.264987	0.127105	1	1
Pcgf5	11.0062	32.6504	36.2375	23.1861	13.463	11.2758	10.2951	10.5812	1.56878	1.71917	1.07494	0.290683	0.0349133	-0.0963586	-0.0568132	1	1
Tmem132a	15.8607	26.7105	35.5795	27.8791	27.9998	21.8039	17.728	15.3578	0.751951	1.16559	0.813728	0.81996	0.45913	0.160573	-0.0464849	1	1
Sgms1	17.1614	20.9351	69.844	25.9322	19.5455	29.0215	26.406	19.8483	0.286757	2.02497	0.595577	0.187669	0.757955	0.621699	0.209848	1	1
Ssfa2	23.0377	37.1255	54.8182	41.1506	30.456	28.2354	23.6347	20.8265	0.688414	1.25066	0.836917	0.40273	0.293508	0.0369099	-0.145576	1	1
Traf6	6.02079	12.7161	13.0846	10.4689	9.51365	8.96437	7.62911	7.51987	1.07863	1.11985	0.798085	0.660046	0.574249	0.341562	0.320755	1	1
Slc20a1	33.3902	114.414	139.688	69.9463	48.8583	49.6575	41.5106	33.365	1.77677	2.06471	1.06682	0.549179	0.572587	0.314055	-0.00108923	1	1
Rbm38	8.1377	14.832	21.3681	16.5342	8.25997	6.38575	5.54696	5.8871	0.86602	1.39277	1.02276	0.0215154	-0.349765	-0.552924	-0.467064	1	1
Gabpb1	9.02072	13.8765	26.7923	24.6699	16.8203	13.7128	9.10799	7.87847	0.621329	1.5705	1.45144	0.898889	0.604209	0.0138901	-0.195327	1	1
Il1a	10.0021	360.488	930.769	897.664	463.49	317.782	153.575	105.736	5.17158	6.54005	6.4878	5.53416	4.98966	3.94057	3.40209	1	1
Il1b	55.8791	2093.75	3954.95	3502.35	1555.37	1010.79	672.989	559.766	5.22764	6.14521	5.96987	4.79881	4.17703	3.5902	3.32444	1	1
Flrt3	2.7025	28.5499	148.755	119.12	40.6851	20.3463	9.92883	5.82253	3.40112	5.7825	5.46198	3.91213	2.9124	1.87733	1.10735	1	1
Rbm39	66.4331	96.7992	138.034	128.197	102.338	81.0173	65.2033	63.5006	0.543093	1.05505	0.948388	0.623368	0.286328	-0.0269573	-0.065132	1	1
Skil	14.5982	37.0188	84.6722	47.0619	29.4622	24.1391	27.876	24.9327	1.34247	2.5361	1.68877	1.01307	0.725581	0.933233	0.772249	1	1
Fxr1	28.7005	53.8391	59.6978	55.0793	41.4109	34.3462	29.2952	28.9261	0.907578	1.0566	0.940434	0.528935	0.259075	0.0295884	0.011296	1	1
Hspa4l	5.61273	14.0228	19.4816	15.211	6.63204	4.97681	4.79127	6.91058	1.321	1.79534	1.43834	0.24075	-0.173481	-0.228295	0.300104	1	1
Ccrn4l	10.2399	12.21	22.3369	13.4567	12.8804	12.3119	11.3624	10.8786	0.253862	1.12523	0.394123	0.330976	0.265852	0.150066	0.0872913	1	1
Ap4b1	9.41237	9.89214	23.16	18.997	12.0882	12.1431	10.5248	10.2437	0.0717246	1.29901	1.01314	0.360969	0.367507	0.161163	0.122107	1	1
Ints12	10.8683	19.9252	23.7673	13.4638	11.9921	11.7491	9.84736	10.221	0.874468	1.12885	0.308959	0.141958	0.112424	-0.142317	-0.0885899	1	1
Gtf2b	32.5068	47.7451	92.1865	68.1056	37.443	34.0937	31.9534	32.2084	0.554611	1.50381	1.06703	0.203954	0.0687636	-0.0247721	-0.0133045	1	1
Gyg	41.8889	99.8922	103.899	75.0071	36.4778	30.2615	32.1374	34.5192	1.2538	1.31054	0.840459	-0.199549	-0.469084	-0.382315	-0.279169	1	1
Rapgef2	3.74146	6.0685	24.5356	10.6902	7.38134	7.13607	6.76014	5.89297	0.697739	2.7132	1.51462	0.980281	0.931528	0.853452	0.655394	1	1
Dnajb4	17.2238	32.9099	48.6966	24.1131	26.803	27.7848	22.2836	17.8849	0.934118	1.49942	0.485414	0.637991	0.689892	0.371579	0.0543386	1	1
Ugcg	14.7132	23.3572	39.6023	36.7561	22.5503	16.6809	11.7442	11.1659	0.666756	1.42847	1.32087	0.616036	0.181086	-0.325163	-0.398012	1	1
Lepr	4.76788	16.8731	17.742	12.576	8.19081	5.99268	3.01269	2.84081	1.82331	1.89575	1.39925	0.780658	0.329853	-0.662296	-0.747046	1	1
Mier1	12.0048	24.1436	24.2387	18.7183	14.273	12.0758	10.6826	11.141	1.00803	1.0137	0.640838	0.249677	0.0085074	-0.168349	-0.107733	1	1
Rnf19b	37.2507	55.4558	85.1337	63.2023	52.2399	47.2963	51.3208	51.8688	0.574071	1.19246	0.76271	0.487885	0.34446	0.462276	0.477599	1	1
Ptafr	36.097	46.892	112.529	107.06	65.1042	52.6702	53.0004	46.9068	0.377463	1.64035	1.56847	0.850872	0.545108	0.554124	0.377918	1	1
Errfi1	12.9491	89.1645	134.852	45.4321	35.4644	22.7736	13.8121	14.6005	2.78362	3.38045	1.81086	1.45352	0.814511	0.0930809	0.173166	1	1
Tnfrsf9	245.39	440.037	494.795	455.773	390.324	344.194	283.568	258.134	0.842548	1.01175	0.893239	0.669596	0.488145	0.208618	0.0730437	1	1
Ripk2	8.71354	19.3011	33.0984	29.4876	19.616	16.1787	9.96454	9.11491	1.14735	1.92543	1.75878	1.1707	0.892765	0.193544	0.0649695	1	1
Pnrc1	53.7076	226.419	262.414	132.129	81.9459	59.8761	53.2474	53.0905	2.0758	2.28865	1.29875	0.609546	0.156854	-0.0124152	-0.0166725	1	1
Osbpl9	45.3887	80.9058	106.331	67.7093	29.924	25.0028	26.6895	28.894	0.83391	1.22816	0.577021	-0.60103	-0.860244	-0.766061	-0.651563	1	1
Insig1	13.8276	43.0673	58.6935	27.6369	17.904	16.2793	15.2345	14.1934	1.63904	2.08565	0.999045	0.372731	0.235488	0.139791	0.0376694	1	1
Ccng2	19.591	49.6971	64.8743	33.0291	18.0361	13.3285	14.5748	17.5942	1.34297	1.72746	0.753547	-0.119304	-0.555677	-0.426715	-0.155091	1	1
Mafk	10.4876	19.6073	25.8938	19.4743	16.8068	14.682	10.993	10.3852	0.902706	1.30392	0.892887	0.68036	0.485364	0.0679006	-0.0141556	1	1
Hpse	12.7443	25.6336	27.1691	21.9698	15.5764	12.0635	8.77469	10.3904	1.00818	1.09211	0.78567	0.28951	-0.0792036	-0.538432	-0.294601	1	1
Ulk1	7.31513	16.3513	20.7932	10.635	7.70926	7.36975	6.71707	8.06973	1.16045	1.50716	0.539865	0.0757089	0.0107322	-0.123051	0.141637	1	1
Orai2	10.3283	15.2793	53.5621	36.1231	27.738	17.218	17.611	18.3896	0.564976	2.37461	1.80632	1.42526	0.737315	0.769874	0.832287	1	1
Sh2b2	7.87545	13.9546	40.4833	21.0944	13.3566	8.46642	8.82674	9.0208	0.825307	2.36189	1.42143	0.762119	0.10439	0.164518	0.195893	1	1
Serpine1	4.60117	23.5671	37.1672	22.7625	7.42395	5.13008	8.56774	11.8473	2.3567	3.01396	2.30659	0.690186	0.156981	0.896914	1.36449	1	1
Zfand2a	20.0071	24.9942	41.1901	30.6237	26.7595	23.3777	18.635	15.8424	0.321081	1.04179	0.614137	0.419539	0.224621	-0.102497	-0.336721	1	1
Creb5	4.56996	14.5877	16.8866	8.66942	8.97679	8.47491	5.95242	5.55459	1.6745	1.88563	0.923754	0.974018	0.891017	0.381295	0.281499	1	1
Tnip3	16.0843	26.9829	61.8648	37.898	21.3368	17.8903	15.6121	14.3431	0.746392	1.94347	1.23647	0.407691	0.153524	-0.0429885	-0.165296	1	1
Bhlhe40	86.384	152.745	188.464	116.774	82.4381	63.2187	72.7038	71.7711	0.822289	1.12545	0.434883	-0.0674529	-0.450413	-0.248733	-0.267361	1	1
Rbbp6	9.63823	13.8685	25.1003	18.6708	14.549	13.1767	10.2751	9.32144	0.524972	1.38086	0.953944	0.59408	0.451149	0.0923123	-0.0482154	1	1
Pcf11	7.40582	16.641	37.7028	18.7956	10.5708	7.74589	7.759	7.00269	1.16801	2.34794	1.34366	0.513353	0.0647715	0.0672112	-0.0807503	1	1
Arhgap17	12.6435	19.0223	29.3032	16.5192	15.2866	12.6084	11.4604	10.4629	0.589296	1.21266	0.385748	0.273872	-0.00401068	-0.141738	-0.273113	1	1
Dusp4	3.46851	7.88605	20.5331	15.0146	13.3784	11.0814	9.28766	8.66466	1.18499	2.56556	2.11398	1.94752	1.67575	1.421	1.32083	1	1
Hmgb2	18.3383	38.0038	39.1928	21.3117	14.7019	12.4988	12.3437	13.8946	1.05128	1.09573	0.216786	-0.318857	-0.55307	-0.571085	-0.400336	1	1
Dnajb1	15.5098	37.5921	41.1744	27.9863	21.1067	16.8452	16.5997	17.5323	1.27725	1.40857	0.851541	0.444521	0.119157	0.0979771	0.176835	1	1
Ankrd11	8.02431	11.8962	16.2093	11.1496	12.4779	10.9345	9.52442	8.75248	0.568052	1.01437	0.474543	0.636926	0.446438	0.247254	0.125315	1	1
Taf1d	10.3223	26.6195	27.8905	23.2268	18.0069	15.2128	12.4489	10.0831	1.36672	1.43401	1.17003	0.802785	0.559521	0.270254	-0.0338252	1	1
Dennd4a	5.69051	11.7192	22.4244	12.6096	5.86355	4.7553	5.43244	6.29931	1.04224	1.97844	1.14789	0.0432164	-0.259022	-0.0669576	0.146636	1	1
Cish	5.33648	29.5225	33.615	28.9917	11.9994	8.81303	5.9375	6.17654	2.46785	2.65514	2.44168	1.169	0.72375	0.153967	0.21091	1	1
Birc3	34.3105	56.5625	79.2064	74.2113	68.7004	64.0462	58.5451	58.1637	0.721196	1.20697	1.11299	1.00167	0.900463	0.770898	0.761469	1	1
Sorl1	6.9702	14.189	16.945	12.3187	9.65167	6.97852	3.52992	3.53089	1.0255	1.28159	0.821578	0.469579	0.00172105	-0.981565	-0.981168	1	1
Rbm7	33.4506	62.5588	132.404	129.497	76.1495	51.8439	37.5113	33.2901	0.903181	1.98484	1.95281	1.1868	0.632142	0.165293	-0.00693888	1	1
Arih2	16.0849	26.6196	32.3673	28.1753	23.1744	21.3809	17.1921	16.8583	0.726782	1.00883	0.808724	0.526825	0.410616	0.0960388	0.0677521	1	1
Ccrl2	6.66464	292.852	462.109	185.263	50.5254	28.7766	19.3913	18.5321	5.4575	6.11556	4.7969	2.92241	2.1103	1.54081	1.47543	1	1
Atp7a	10.2867	21.1635	22.3023	10.9098	13.1866	15.2282	15.396	13.2218	1.0408	1.11641	0.0848444	0.358292	0.565965	0.581775	0.362138	1	1
Aph1b	3.74556	8.7461	14.036	11.8794	7.35098	4.62079	3.87586	4.61999	1.22346	1.90588	1.66521	0.972755	0.302958	0.049335	0.302708	1	1
Cd69	0.933438	16.9433	22.5312	21.0169	7.86921	4.57714	2.89338	1.89005	4.18202	4.59323	4.49285	3.07559	2.29382	1.63213	1.0178	1	1
Cxcl10	0.878471	32.08	54.9318	25.8069	9.22744	9.51387	3.80599	1.24084	5.19054	5.9665	4.87662	3.39286	3.43697	2.11521	0.498251	1	1
Ereg	0.553131	33.8197	87.8748	58.4286	21.9988	8.47133	2.19643	0.865005	5.9341	7.31168	6.72291	5.31366	3.9369	1.98947	0.645087	1	1
Il23a	0.025009	32.6363	94.4334	38.4328	6.17078	2.34729	0.617617	0.210043	10.3498	11.8826	10.5857	7.94686	6.5524	4.62619	3.07017	1	1
Irs2	2.29936	14.36	22.8463	4.38993	3.68699	3.3033	2.53739	2.45704	2.64275	3.31266	0.932966	0.681211	0.522676	0.142113	0.095689	1	1
Kcnj2	6.29732	15.991	16.136	3.77358	4.56935	4.37125	4.27345	4.00615	1.34445	1.35747	-0.738804	-0.462749	-0.526692	-0.559337	-0.652522	1	1
Lif	0.819854	8.59863	24.0805	21.3379	9.42235	4.72654	2.11058	1.99649	3.39067	4.87635	4.70191	3.52265	2.52735	1.3642	1.28403	1	1
Lmnb1	2.2078	15.1752	17.1862	8.97145	2.29052	1.88367	1.88481	2.11217	2.78103	2.96057	2.02273	0.0530657	-0.229063	-0.22819	-0.0638835	1	1
March7	12.8161	29.413	38.2664	32.9894	23.9632	19.1319	13.5509	12.5937	1.1985	1.57812	1.36405	0.902863	0.578023	0.0804314	-0.0252551	1	1
Nr4a3	1.00985	5.01551	15.421	13.5443	5.62003	2.03568	1.09567	1.2293	2.31226	3.93268	3.74547	2.47644	1.01137	0.117672	0.283696	1	1
Olfr1033	1.27045	7.43735	25.5144	24.3825	19.3658	12.8588	6.51172	3.85205	2.54945	4.3279	4.26243	3.9301	3.33934	2.3577	1.60029	1	1
Pgf	3.07228	20.2699	24.9155	19.7291	5.59668	3.80801	2.99687	2.98461	2.72196	3.01966	2.68294	0.865262	0.309728	-0.0358532	-0.0417673	1	1
Rnd1	1.6926	7.94031	37.7239	35.2661	10.3976	6.16938	4.20593	4.68232	2.22995	4.47817	4.38097	2.61894	1.86588	1.31318	1.46798	1	1
Rnd3	7.01156	24.8131	28.53	14.9864	12.4546	11.9788	8.39786	7.12448	1.82329	2.02467	1.09585	0.828871	0.772676	0.260286	0.0230493	1	1
Atic	31.4661	15.1637	13.9642	17.7846	27.4606	33.2377	39.5325	33.7013	-1.05318	-1.17207	-0.82317	-0.196435	0.0790222	0.329241	0.0990059	1	1
Stk16	10.9602	5.23529	5.16704	7.15392	9.23995	8.69476	10.5054	10.086	-1.06593	-1.08486	-0.615468	-0.246317	-0.334056	-0.061143	-0.11992	1	1
Ptpn7	23.8707	11.0863	9.56579	13.2103	20.2503	20.5531	23.0128	22.006	-1.10646	-1.31928	-0.853578	-0.237298	-0.215885	-0.0528043	-0.117344	1	1
Slc40a1	21.5498	9.95483	8.8916	10.189	24.7144	29.6312	17.1585	10.7008	-1.11421	-1.27716	-1.08066	0.197677	0.459443	-0.328751	-1.00996	1	1
Dtymk	17.5995	10.1934	7.54225	8.20184	11.0661	11.954	16.3328	16.7488	-0.787899	-1.22247	-1.10151	-0.669388	-0.558041	-0.107762	-0.0714767	1	1
Capn2	40.6178	21.5393	19.6698	27.6892	34.3429	36.6102	38.1375	35.7522	-0.915141	-1.04613	-0.552789	-0.2421	-0.149866	-0.0909018	-0.18408	1	1
Smyd2	16.5683	8.32283	8.04282	9.29844	11.4469	13.8561	17.1066	14.104	-0.99328	-1.04265	-0.833365	-0.533469	-0.257904	0.0461275	-0.232321	1	1
Dusp6	47.6908	16.0174	3.24261	5.86417	16.1035	23.4195	31.9748	38.3942	-1.57407	-3.87848	-3.02371	-1.56634	-1.026	-0.576776	-0.312823	1	1
Mbd3	42.2635	21.7394	20.4703	23.3012	34.7046	36.8906	39.6772	41.1679	-0.9591	-1.04588	-0.859008	-0.284285	-0.196159	-0.091102	-0.0378924	1	1
Mrpl22	24.4593	14.9962	10.6176	12.9999	16.3237	20.1915	21.73	22.5502	-0.705786	-1.20393	-0.911883	-0.583415	-0.276635	-0.170695	-0.117243	1	1
Rufy1	10.6579	5.49956	5.27169	5.41754	6.58814	7.98188	9.06403	10.6484	-0.954535	-1.01559	-0.976213	-0.69398	-0.417123	-0.233699	-0.00128653	1	1
Pfn1	1383.36	707.262	668.146	989.668	1169.75	1180.98	1328.02	1358.62	-0.96786	-1.04994	-0.48316	-0.241976	-0.228192	-0.0588998	-0.0260346	1	1
Nme1	67.4742	34.3981	30.0276	33.0534	37.3215	39.1993	55.7321	59.9508	-0.972007	-1.16805	-1.02954	-0.854329	-0.783508	-0.275827	-0.170557	1	1
Nt5c	47.5173	21.2284	20.7631	29.0487	32.9953	36.4366	44.6872	51.254	-1.16246	-1.19443	-0.709979	-0.526192	-0.383065	-0.0885912	0.109212	1	1
Timm9	11.9733	6.309	5.51861	7.94733	7.90161	12.1907	13.1084	11.0704	-0.924338	-1.11744	-0.591279	-0.599602	0.0259601	0.130671	-0.113113	1	1
0610007P14Rik	16.7341	9.46307	6.83828	8.75147	11.5163	11.9645	15.6933	16.4296	-0.822411	-1.29109	-0.935194	-0.539114	-0.484031	-0.0926422	-0.0264936	1	1
6430527G18Rik	13.3274	7.64654	3.73783	4.45694	8.41512	10.5231	13.7877	14.3719	-0.801516	-1.83412	-1.58027	-0.66334	-0.340836	0.0489865	0.108855	1	1
Fgd3	14.8383	11.9861	7.09747	8.97217	15.9826	18.2365	20.728	18.1313	-0.307963	-1.06395	-0.725797	0.107176	0.297503	0.482255	0.289157	1	1
Exosc4	13.2848	8.92966	6.54654	7.07862	10.7211	11.8899	12.854	13.8699	-0.573099	-1.02097	-0.908236	-0.309324	-0.16004	-0.0475591	0.0621809	1	1
Commd5	12.6189	6.04514	4.94393	8.13675	10.5839	11.7836	13.3107	12.0897	-1.06174	-1.35186	-0.633062	-0.253715	-0.0988058	0.0770003	-0.0618077	1	1
Polr2f	96.83	41.0735	39.788	46.8486	60.5425	59.8574	82.5301	85.0265	-1.23725	-1.28312	-1.04745	-0.677506	-0.693924	-0.230534	-0.187542	1	1
Nfam1	53.2423	26.6693	17.9633	24.2763	37.175	39.8054	61.1684	61.3474	-0.997393	-1.56752	-1.13302	-0.51824	-0.419609	0.200214	0.204429	1	1
Nde1	15.7558	7.95387	7.78877	12.0179	15.6028	15.4191	18.7956	17.923	-0.986154	-1.01642	-0.390698	-0.0140781	-0.0311645	0.254512	0.185929	1	1
Trmt2a	13.9182	7.1566	5.80186	7.93582	12.7734	14.2083	15.2665	14.1093	-0.959626	-1.26239	-0.810521	-0.12383	0.0297613	0.133397	0.0196738	1	1
Cbr3	29.3934	15.6097	13.1304	15.1142	30.2875	38.8457	36.3292	33.7537	-0.913049	-1.16258	-0.959588	0.0432303	0.402263	0.305637	0.199553	1	1
Ppil1	12.653	4.98351	4.52406	10.9767	12.7088	15.1686	14.8629	11.57	-1.34425	-1.48379	-0.205035	0.00634833	0.261608	0.232236	-0.129091	1	1
Minpp1	10.8555	6.54389	4.93188	4.98131	6.61421	8.21714	10.4396	11.4217	-0.730206	-1.13822	-1.12383	-0.714785	-0.401718	-0.0563597	0.0733512	1	1
Trim8	27.5648	20.2095	12.9863	17.5154	25.4176	25.3638	29.2507	31.3148	-0.447794	-1.08584	-0.654203	-0.116999	-0.120056	0.085644	0.184018	1	1
Gstp1	762.295	288.508	263.459	309.444	380.341	459.72	641.139	710.804	-1.40174	-1.53277	-1.30067	-1.00306	-0.729594	-0.249712	-0.100898	1	1
Gstp1	266.17	103.517	98.8106	114.941	141.688	172.068	218.26	253.786	-1.36248	-1.42961	-1.21145	-0.90963	-0.629369	-0.2863	-0.0687355	1	1
Zdhhc6	16.3351	9.24014	8.0975	12.2466	19.1704	21.7026	24.8997	24.4995	-0.821989	-1.01243	-0.415594	0.230905	0.409893	0.608153	0.584777	1	1
Nudt5	12.0147	5.5825	5.25752	5.94732	6.91368	8.11491	12.5424	14.2619	-1.10582	-1.19235	-1.01449	-0.797275	-0.566154	0.0620128	0.247366	1	1
Mrps2	10.1867	4.80679	4.72658	9.52308	12.9931	13.1594	12.6378	11.0932	-1.08354	-1.10782	-0.0971866	0.351059	0.369407	0.311059	0.122989	1	1
Sfpi1	289.542	136.309	128.906	252.886	322.107	291.403	290.259	273.773	-1.08689	-1.16745	-0.195285	0.153767	0.00924309	0.00356817	-0.0807925	1	1
Ssna1	39.0045	21.5566	16.2876	25.3233	27.804	32.3316	35.4923	38.1676	-0.855511	-1.25987	-0.623175	-0.488348	-0.270696	-0.136135	-0.0312921	1	1
Rgs19	54.4248	26.4295	21.6317	22.697	30.5128	38.7447	51.3359	52.4718	-1.04212	-1.33112	-1.26176	-0.83485	-0.490265	-0.0842961	-0.0527219	1	1
Clk2	17.6727	8.77395	8.28087	9.67232	16.776	17.8071	16.0468	16.4425	-1.01022	-1.09367	-0.869589	-0.0751237	0.0109301	-0.139237	-0.104093	1	1
Adar	8.88615	4.91849	4.26464	7.09135	13.5125	15.3365	12.9355	12.6359	-0.853343	-1.05913	-0.325498	0.604664	0.787339	0.541705	0.507898	1	1
Gclm	263.525	120.369	120.035	188.323	334.84	455.196	411.147	349.604	-1.13048	-1.13448	-0.484731	0.345532	0.788548	0.641714	0.407782	1	1
Tesk1	16.5936	8.46944	8.2634	8.80076	15.3051	16.9514	19.0144	17.6432	-0.970288	-1.00582	-0.914927	-0.116614	0.0307775	0.196466	0.0884853	1	1
Taf12	17.6958	10.4617	8.45944	10.5751	12.7172	16.3965	18.9981	20.1692	-0.75829	-1.06477	-0.742736	-0.476626	-0.110019	0.102448	0.188747	1	1
Srm	22.8336	9.2839	8.96871	13.9625	19.3009	20.3448	27.8971	21.347	-1.29836	-1.34819	-0.709601	-0.24249	-0.166498	0.288957	-0.097125	1	1
Plin2	865.808	365.989	335.657	437.199	543.915	642.177	658.061	596.965	-1.24225	-1.36706	-0.985757	-0.670666	-0.431076	-0.395826	-0.536401	1	1
Rnf220	16.3281	8.08491	7.21613	8.79156	13.1529	14.1301	15.1269	15.7749	-1.01405	-1.17806	-0.893166	-0.311976	-0.208585	-0.110241	-0.0497261	1	1
Slc4a2	14.1873	6.66156	5.47111	9.39914	14.731	15.282	15.047	14.1671	-1.09067	-1.37469	-0.593999	0.0542553	0.107233	0.0848758	-0.00205559	1	1
Sh3bp2	42.4473	22.6238	19.5275	33.0774	42.7792	41.2359	40.6091	38.1491	-0.907832	-1.12017	-0.359827	0.0112367	-0.0417719	-0.0638697	-0.154024	1	1
Orai1	30.0768	20.3865	13.222	14.8217	20.7642	24.008	26.814	28.8116	-0.561037	-1.18571	-1.02094	-0.534553	-0.325136	-0.165665	-0.0620013	1	1
Eif2b4	10.7838	7.04041	5.37653	5.4275	8.87433	10.8129	11.88	12.9671	-0.615134	-1.00412	-0.990506	-0.281156	0.00388786	0.139669	0.26599	1	1
Letm1	9.4523	4.00691	3.72351	5.99687	9.65745	10.6788	10.308	10.1528	-1.23818	-1.344	-0.656456	0.0309769	0.176012	0.125027	0.10314	1	1
Gusb	80.6476	43.4241	36.1833	40.64	43.6932	44.3704	70.4829	81.3854	-0.893136	-1.15631	-0.988731	-0.884223	-0.862034	-0.194358	0.0131384	1	1
Nagk	27.4865	16.9944	13.6886	14.4015	17.047	18.8359	20.84	23.3761	-0.693664	-1.00575	-0.932504	-0.689205	-0.545238	-0.399368	-0.233689	1	1
Spsb2	16.5277	13.3803	6.26541	6.79628	11.3659	12.2815	13.5463	14.7695	-0.304776	-1.39941	-1.28207	-0.540174	-0.428399	-0.286987	-0.162265	1	1
Dok1	34.6923	27.0132	12.5702	15.188	23.9452	27.702	35.5745	35.6131	-0.360951	-1.46461	-1.19168	-0.534879	-0.324625	0.036228	0.0377925	1	1
Bid	11.0558	5.1253	4.85032	10.1411	12.6473	12.0643	10.7082	10.5384	-1.1091	-1.18865	-0.124589	0.194026	0.125941	-0.0460874	-0.0691476	1	1
Prpf31	13.2107	6.24823	5.48389	7.96765	11.7741	13.6153	17.068	17.1846	-1.08019	-1.26844	-0.729481	-0.16609	0.0435219	0.369587	0.379409	1	1
Ptgir	20.1076	12.782	7.83945	14.4757	23.9723	25.7137	25.7967	24.4358	-0.653627	-1.35892	-0.474108	0.253627	0.354796	0.359446	0.281255	1	1
Sertad3	10.2587	7.9181	2.92821	6.63597	6.51006	7.2383	8.95566	10.7077	-0.373622	-1.80876	-0.628469	-0.656105	-0.503125	-0.195976	0.0618007	1	1
Cebpa	33.9635	17.4247	13.0448	18.6793	30.8071	31.4567	38.9862	36.1203	-0.962851	-1.38051	-0.862545	-0.140722	-0.110618	0.198978	0.0888247	1	1
Pih1d1	22.8511	8.51388	8.13728	9.77673	14.7057	15.0093	19.9447	20.4797	-1.42437	-1.48965	-1.22484	-0.635888	-0.606407	-0.196258	-0.158069	1	1
Ccdc101	10.7145	5.512	4.58931	4.82906	6.44817	5.90881	11.3592	9.89226	-0.958917	-1.22322	-1.14975	-0.732603	-0.858625	0.0842967	-0.115192	1	1
Orai3	21.0764	10.2796	9.20772	10.2447	12.0788	13.6039	17.7687	17.3391	-1.03584	-1.19471	-1.04075	-0.803151	-0.631608	-0.24629	-0.281599	1	1
Taok2	11.6662	6.79018	5.57405	7.13578	11.6134	11.7969	11.6661	11.9442	-0.780813	-1.06554	-0.709192	-0.00654431	0.0160731	-1.23665e-05	0.0339755	1	1
Hras1	25.482	12.3329	11.6849	15.9663	21.4936	24.2364	26.3018	24.5688	-1.04697	-1.12483	-0.674448	-0.245571	-0.0723031	0.045683	-0.0526511	1	1
Nr2c2ap	21.2563	11.4496	8.99926	13.8388	19.543	24.137	23.1751	21.6503	-0.892593	-1.24001	-0.619172	-0.121239	0.183356	0.124685	0.0264965	1	1
Idh3a	10.3692	4.9504	4.30857	5.54699	7.57059	7.67451	11.7585	11.7385	-1.06669	-1.26702	-0.902528	-0.453827	-0.434158	0.181399	0.178943	1	1
Twf2	46.7877	26.468	22.2597	25.0415	31.6644	33.7629	43.9682	47.7776	-0.82188	-1.0717	-0.901808	-0.563268	-0.47069	-0.0896688	0.0302051	1	1
S1pr2	28.2465	13.511	6.45189	9.13036	16.9499	20.3651	32.2284	31.6347	-1.06394	-2.13028	-1.62933	-0.736795	-0.471973	0.19026	0.163436	1	1
Keap1	21.7685	11.8203	8.50545	9.47689	21.4484	24.2624	24.0788	23.4982	-0.880975	-1.35578	-1.19976	-0.021372	0.15648	0.145521	0.110308	1	1
Rnf128	176.42	82.5195	77.6118	78.7955	86.4256	100.323	144.538	172.211	-1.09621	-1.18467	-1.16283	-1.02948	-0.814362	-0.287565	-0.0348368	1	1
Pdzd11	16.0246	8.53893	6.92629	10.7594	14.4702	17.0075	19.1827	19.2572	-0.908161	-1.21013	-0.574691	-0.147203	0.0858827	0.259517	0.26511	1	1
Hist4h4	5.67737	9.24429	12.4893	15.7772	8.88851	3.50598	2.70559	1.62629	0.70334	1.1374	1.47455	0.646719	-0.695405	-1.06928	-1.80364	2	2
Ppap2b	6.57987	2.61572	5.41852	21.8356	20.6147	18.2489	15.3063	10.823	-1.33085	-0.28016	1.73055	1.64754	1.47168	1.21799	0.717969	2	2
Hspa1l	9.57977	24.7638	40.2226	70.9971	28.6988	21.9085	4.3011	5.22034	1.37017	2.06994	2.8897	1.58293	1.19343	-1.15529	-0.875847	2	2
Rrs1	12.1361	8.97573	23.1292	42.9875	37.8516	27.6882	20.8122	17.2605	-0.435204	0.93041	1.82461	1.64105	1.18997	0.778125	0.508169	2	2
Agfg1	15.4502	12.7562	20.3395	37.2832	34.7257	30.9231	21.9197	18.8046	-0.276427	0.396659	1.2709	1.16838	1.00106	0.504603	0.28346	2	2
Ppp1r15b	19.3644	19.9494	27.4287	48.924	46.388	38.9197	30.8568	27.991	0.0429386	0.502279	1.33714	1.26034	1.00709	0.672182	0.531556	2	2
Acbd3	18.3628	22.7968	30.3268	47.0545	31.5962	24.9595	19.4476	19.3996	0.312045	0.723807	1.35755	0.782965	0.442803	0.0828061	0.0792408	2	2
Hdlbp	30.7431	52.2843	67.821	68.7284	52.1474	45.4276	35.1931	32.8682	0.766115	1.14147	1.16064	0.762333	0.563306	0.19503	0.0964298	2	2
St8sia4	28.1933	31.3584	53.4638	69.0707	53.4849	46.6146	27.1885	22.9298	0.1535	0.92321	1.29272	0.923779	0.72543	-0.0523558	-0.298129	2	2
Zc3h11a	20.9436	26.2153	39.0468	43.3161	37.961	30.7692	23.7222	22.1493	0.3239	0.898695	1.04839	0.858009	0.554977	0.179728	0.0807517	2	2
Rnf2	7.94829	13.0873	16.0368	19.1984	13.9258	10.596	8.82187	9.03783	0.719451	1.01267	1.27227	0.809044	0.414803	0.15044	0.185332	2	2
Reps1	9.26365	12.0613	16.1002	23.5597	22.438	18.1387	10.7741	9.46254	0.380733	0.797426	1.34667	1.27629	0.969418	0.217915	0.0306467	2	2
Cd24a	21.995	41.2041	64.006	79.3612	68.1465	52.9487	28.1419	19.0101	0.905612	1.54103	1.85126	1.63146	1.26742	0.355544	-0.210409	2	2
Ranbp2	7.4076	10.0294	14.4268	16.2714	14.6301	12.5198	9.92692	8.88578	0.437157	0.961673	1.13526	0.981862	0.757133	0.42234	0.262492	2	2
Adora2a	3.15828	6.9446	22.7591	44.3853	30.2885	16.9565	10.4288	9.7701	1.13675	2.84923	3.81287	3.26156	2.42463	1.72336	1.62923	2	2
Icosl	6.0416	8.73665	42.1887	77.1255	52.5557	29.2529	11.5858	8.33555	0.53215	2.80385	3.67421	3.12084	2.27558	0.939355	0.464347	2	2
Gadd45b	19.0332	132.684	216.213	236.453	217.876	138.811	84.1918	60.7705	2.8014	3.50586	3.63496	3.51692	2.86653	2.14516	1.67485	2	2
Pwp1	8.82334	6.04183	8.75832	26.6748	24.5114	19.1072	13.3705	10.8063	-0.546339	-0.0106707	1.59608	1.47406	1.11472	0.599657	0.292476	2	2
Btg1	173.93	307.405	470.086	510.137	267.496	232.289	174.735	155.43	0.821634	1.43442	1.55238	0.621011	0.417414	0.00666182	-0.162242	2	2
Rab32	44.0364	22.9618	76.7471	170.096	157.424	117.568	83.9427	73.1839	-0.939461	0.801416	1.94958	1.83789	1.41673	0.930708	0.73283	2	2
Stx11	15.3155	29.4751	72.8636	115.199	82.1558	55.6286	25.2374	17.8892	0.944504	2.25021	2.91106	2.42337	1.86083	0.720571	0.224096	2	2
Marcks	31.4747	26.1005	62.2968	102.783	85.3433	61.0419	45.7236	38.6366	-0.270115	0.984965	1.70734	1.43909	0.955607	0.538746	0.295776	2	2
Slc16a10	20.5987	12.4189	40.2689	48.2541	44.4897	31.4937	28.7549	27.9711	-0.730016	0.967113	1.2281	1.11092	0.61251	0.481255	0.441384	2	2
Srgn	592.745	856.355	1008.32	1220.85	989.969	935.027	799.502	717.6	0.530797	0.76647	1.0424	0.739972	0.657596	0.43169	0.275768	2	2
Klf16	7.67704	12.9599	13.2391	21.7388	17.2244	13.038	8.33411	7.99037	0.755433	0.786183	1.50165	1.16583	0.764101	0.118478	0.0577121	2	2
Pias4	10.6935	13.999	17.4977	22.3518	20.8283	17.9917	14.1788	13.1889	0.38859	0.710431	1.06366	0.961811	0.750597	0.407001	0.30259	2	2
Cry1	6.99873	5.59244	14.6493	26.7106	18.9654	11.6593	5.41429	5.27483	-0.323615	1.06567	1.93225	1.4382	0.736316	-0.370321	-0.407969	2	2
Prdm4	6.45494	6.59258	10.8097	15.6583	13.6141	10.8747	7.39105	7.14787	0.0304395	0.743851	1.27845	1.07663	0.7525	0.195376	0.14711	2	2
Rap1b	166.743	173.04	266.582	413.87	359.696	299.253	227.427	189.272	0.0534794	0.676953	1.31155	1.10915	0.84374	0.447777	0.182835	2	2
Cand1	8.35761	9.21687	12.3609	17.5264	13.731	11.0291	9.42171	8.69566	0.141186	0.564621	1.06837	0.716274	0.400153	0.172898	0.0572051	2	2
Upp1	19.4542	55.3448	80.7283	125.353	119.676	114.17	84.6246	69.2416	1.50837	2.05299	2.68784	2.62098	2.55303	2.121	1.83156	2	2
Wdr92	32.2922	111.358	257.869	288.205	232.208	169.45	91.9776	60.8777	1.78595	2.99738	3.15784	2.84616	2.3916	1.5101	0.914728	2	2
Cpeb4	6.4625	10.2416	25.0373	42.1363	27.4415	19.2888	12.5191	8.36379	0.664277	1.95391	2.7049	2.0862	1.5776	0.953967	0.372064	2	2
Lcp2	27.6401	27.7075	39.9848	63.6718	62.3649	57.0354	50.1087	45.5009	0.00351371	0.532689	1.20389	1.17397	1.04509	0.858298	0.719132	2	2
Aff4	7.33114	11.6721	16.543	16.5581	12.4479	9.99944	8.40128	7.63473	0.670955	1.17411	1.17543	0.763793	0.44781	0.196572	0.0585396	2	2
G3bp1	47.2554	35.5724	73.9084	108.61	89.6289	72.4308	55.6794	46.7873	-0.409721	0.645259	1.20061	0.923485	0.616124	0.236664	-0.0143622	2	2
Adora2b	7.43814	5.78364	58.8568	97.6223	51.0405	31.1515	17.7224	13.5601	-0.362964	2.9842	3.7142	2.77863	2.06629	1.25256	0.866354	2	2
Pmp22	27.3463	30.7127	63.1297	111.424	102.162	80.9294	50.4125	33.2577	0.16749	1.20697	2.02664	1.90144	1.56532	0.882436	0.282343	2	2
Pik3r5	29.6757	29.2762	72.912	107.489	73.2705	54.4214	41.7122	40.3232	-0.0195538	1.29687	1.85684	1.30395	0.874892	0.491187	0.442328	2	2
Ccl4	10.1305	27.7782	89.2082	266.794	264.047	189.385	67.6458	38.1071	1.45525	3.13847	4.71895	4.70402	4.22454	2.73929	1.91135	2	2
Stat5a	8.87733	9.22012	13.3928	43.1519	37.9285	25.517	14.3792	12.4193	0.0546597	0.59326	2.28123	2.09508	1.52326	0.695786	0.484386	2	2
Plek	63.3178	225.057	679.347	786.238	547.693	330.768	141.471	89.5459	1.82961	3.42347	3.63428	3.11268	2.38514	1.15982	0.500016	2	2
B3gnt2	25.841	39.3957	58.0159	69.7524	54.0434	43.5258	31.8924	25.4312	0.608376	1.16679	1.43258	1.06446	0.752209	0.303551	-0.0230624	2	2
Sqstm1	374.4	456.982	1162.04	2211.09	1875.78	1422.57	729.254	539.437	0.287557	1.63401	2.56211	2.32484	1.92585	0.961841	0.526874	2	2
Map2k4	15.5369	14.1483	25.2317	31.0949	26.7955	22.1433	16.9196	15.2091	-0.13507	0.699539	1.00098	0.786292	0.511172	0.122997	-0.0307639	2	2
Ndel1	26.4537	38.5974	58.8739	61.9508	44.8209	39.444	31.6543	26.173	0.545034	1.15416	1.22765	0.760702	0.576336	0.258932	-0.0153902	2	2
Taok1	6.53812	7.78095	11.2934	13.0879	11.9818	9.7569	7.87656	6.9835	0.25107	0.788532	1.00129	0.873897	0.577547	0.26869	0.0950744	2	2
Ccl3	48.0349	382.28	1441.01	2862.13	2303.89	1464.81	394.913	209.35	2.99247	4.90685	5.89686	5.58385	4.93049	3.03938	2.12376	2	2
Appbp2	7.03216	11.1589	12.5438	19.2628	17.2344	14.3319	9.41926	8.01897	0.666155	0.834935	1.45378	1.29325	1.02719	0.421646	0.189449	2	2
Med13	4.58652	5.9405	13.3188	13.7296	9.78536	7.42777	6.11145	5.48291	0.373184	1.53799	1.58182	1.09322	0.695529	0.414115	0.257542	2	2
1200011M11Rik	5.94999	7.3286	14.0022	17.7857	12.3657	10.4308	8.33982	6.98065	0.30065	1.23469	1.57976	1.05538	0.809891	0.487129	0.230474	2	2
Ube2z	27.1778	25.1826	37.8718	58.3474	55.2489	45.3598	33.9352	31.3997	-0.110001	0.478695	1.10224	1.02352	0.738986	0.320354	0.208322	2	2
Ddx5	175.595	253.079	420.237	425.717	303.896	240.924	186.271	168.177	0.527336	1.25895	1.27764	0.791326	0.456326	0.0851513	-0.0622714	2	2
Rhbdf2	24.2141	24.576	55.4957	89.9159	78.0507	59.1836	40.925	33.8461	0.0214027	1.19653	1.89273	1.68856	1.28935	0.757135	0.483142	2	2
Odc1	21.5968	34.2002	58.6765	82.5704	77.4704	52.0366	24.3111	18.8631	0.663187	1.44197	1.93481	1.84283	1.26871	0.170798	-0.195251	2	2
Hif1a	61.9785	71.5984	98.4708	147.046	113.167	86.5436	76.639	80.5165	0.20816	0.667928	1.24643	0.868614	0.481659	0.306311	0.377517	2	2
Sipa1l1	4.01338	6.37363	7.79416	13.5824	12.1205	9.75291	9.12393	7.46569	0.667298	0.957576	1.75885	1.59456	1.28101	1.18484	0.895458	2	2
Jdp2	7.49333	5.93125	22.7546	61.6059	24.215	11.743	7.72555	8.12137	-0.337271	1.60248	3.03939	1.69222	0.648122	0.0440307	0.116116	2	2
Batf	9.25301	7.26457	12.4898	61.1033	54.5779	36.3577	22.6514	17.8747	-0.349045	0.432756	2.72326	2.56032	1.97427	1.29161	0.949924	2	2
Ahr	5.35155	9.4319	13.3756	20.0126	10.6855	9.98522	6.52224	5.43081	0.817592	1.32157	1.90288	0.997626	0.899837	0.285411	0.0212106	2	2
Rdh11	8.39919	9.4343	22.6873	37.5469	30.1799	21.8976	13.181	10.3105	0.167665	1.43356	2.16037	1.84527	1.38245	0.650138	0.295792	2	2
Moap1	14.1538	31.3585	32.0522	32.7945	25.2053	23.391	18.6976	16.6876	1.14767	1.17923	1.21226	0.832538	0.724764	0.401664	0.237587	2	2
Cdca4	14.003	14.2365	19.4161	34.1421	24.9371	19.9563	15.2766	13.3956	0.0238586	0.471518	1.28582	0.832558	0.511108	0.125588	-0.0639767	2	2
Larp4b	18.3502	22.9637	42.4409	61.6524	50.1712	37.6173	24.5041	20.3577	0.323559	1.20966	1.74836	1.45106	1.0356	0.417227	0.149779	2	2
Inhba	8.98856	32.1721	131.958	192.511	162.589	82.7944	34.0501	21.866	1.83965	3.87584	4.42071	4.177	3.20337	1.9215	1.28253	2	2
Jarid2	7.22308	10.8377	16.1341	17.8538	10.3908	7.46295	7.43676	8.26061	0.585373	1.15943	1.30555	0.524621	0.0471319	0.0420601	0.193634	2	2
Cks2	19.4687	56.9806	77.1647	95.5811	61.4507	43.7547	30.4092	24.1299	1.54931	1.98678	2.29557	1.65827	1.16828	0.643351	0.309665	2	2
Ell2	12.8552	13.3031	60.295	88.1828	63.5879	46.52	32.7418	25.9597	0.0494104	2.22969	2.77815	2.3064	1.8555	1.34878	1.01392	2	2
Gtpbp4	21.447	20.5991	28.0867	46.9671	42.7802	38.433	28.5498	22.6234	-0.0581946	0.389111	1.13087	0.996167	0.84157	0.412705	0.0770399	2	2
Hist4h4	13.5741	44.4311	36.9161	55.1279	24.1835	19.3228	8.66959	8.06706	1.71071	1.44339	2.02193	0.833167	0.509448	-0.646821	-0.750742	2	2
S100a4	22.7309	21.8518	36.078	46.3723	40.2642	32.6108	25.758	24.0292	-0.0569027	0.666465	1.02861	0.824843	0.520695	0.180366	0.0801338	2	2
Erbb2ip	10.9978	10.3589	23.0889	36.2061	22.6057	16.6409	11.3877	9.92164	-0.0863441	1.06998	1.71902	1.03947	0.597519	0.0502614	-0.148564	2	2
Gpbp1	13.7551	22.5715	26.6532	29.7363	26.4205	22.0972	17.7132	15.8322	0.714536	0.954342	1.11226	0.941691	0.683897	0.364858	0.202895	2	2
Vcl	13.5791	9.06609	24.0289	39.9535	32.1238	22.6249	15.8972	14.6366	-0.582835	0.823383	1.55693	1.24225	0.736524	0.227385	0.108193	2	2
Arf4	54.1963	97.4702	135.684	152.73	104.384	79.9783	56.8857	53.5847	0.846767	1.32398	1.49472	0.945634	0.561414	0.0698717	-0.0163732	2	2
Arhgef3	4.66611	11.9857	18.6889	18.7358	13.3187	11.0115	9.49712	10.7225	1.36102	2.00189	2.00551	1.51316	1.23872	1.02527	1.20035	2	2
Mapk1ip1l	27.5897	27.0292	39.7889	55.9692	44.999	36.485	28.9772	24.4862	-0.029611	0.528236	1.0205	0.705763	0.403174	0.0707884	-0.172161	2	2
Pnp	46.0136	32.5764	58.6255	92.2426	90.566	77.4227	67.7571	69.004	-0.498233	0.349468	1.00337	0.976909	0.750696	0.558312	0.58462	2	2
Pnp2	28.7391	20.5243	36.3628	60.0636	54.7506	48.1678	43.3109	42.893	-0.485682	0.339448	1.06348	0.92986	0.745054	0.591715	0.577727	2	2
Mtmr6	23.2324	24.062	35.5715	47.0808	33.145	24.9941	22.5865	23.7812	0.0506184	0.614584	1.019	0.512653	0.105449	-0.0406775	0.0336833	2	2
Gnl3	15.7339	16.3668	24.4749	32.5495	31.7644	27.9478	20.7324	13.7285	0.056896	0.637427	1.04876	1.01353	0.828858	0.398011	-0.196702	2	2
Gch1	17.3909	21.1958	50.6057	66.6139	48.8217	33.1046	23.303	23.9108	0.285446	1.54097	1.93749	1.48919	0.928699	0.422183	0.45933	2	2
Kpna3	13.4368	14.5346	25.2273	60.4772	45.5191	30.5447	18.1561	14.9115	0.113302	0.908796	2.1702	1.76028	1.18473	0.434265	0.150236	2	2
1190002H23Rik	12.2451	51.4104	94.767	99.0845	29.4079	14.939	12.9348	15.4195	2.06986	2.95218	3.01645	1.264	0.286879	0.0790532	0.332551	2	2
Fbxl3	13.9109	18.0698	27.7453	30.5874	23.3492	19.066	15.1564	14.0318	0.377365	0.996028	1.13672	0.747157	0.454786	0.123711	0.0124843	2	2
Dab2	20.3163	21.5642	35.0206	46.1851	30.6842	23.6582	19.381	17.1184	0.0860005	0.785566	1.18479	0.594858	0.219703	-0.0679947	-0.24709	2	2
Golph3	36.2003	41.6031	64.6193	79.6913	62.5145	47.481	35.7219	34.3683	0.200689	0.835963	1.13842	0.788189	0.391349	-0.0191928	-0.0749232	2	2
Myo10	5.3211	5.06539	6.05708	17.5976	15.5429	12.587	12.5146	11.3498	-0.0710512	0.186898	1.72558	1.54646	1.24214	1.23382	1.09287	2	2
Dcaf13	25.59	21.0829	30.5182	51.2516	48.1504	41.9628	33.3381	27.6183	-0.279507	0.25409	1.00202	0.911968	0.713531	0.381592	0.110044	2	2
Zhx2	2.68036	3.65528	4.19264	17.3283	15.7049	9.59877	4.41937	4.28401	0.447555	0.645432	2.69263	2.55072	1.84042	0.721414	0.676535	2	2
Lrp12	21.5791	30.3075	54.1671	75.8557	44.9772	34.1226	22.5034	16.6518	0.49004	1.32778	1.81362	1.05956	0.661093	0.0605083	-0.373957	2	2
Ext1	8.36871	6.24455	7.12793	18.7609	18.3635	15.8024	14.7205	12.6635	-0.422408	-0.231522	1.16465	1.13376	0.917067	0.81475	0.597599	2	2
Zfp263	12.08	12.273	30.2484	39.0827	29.0102	21.2384	15.9762	15.4789	0.0228675	1.32424	1.69391	1.26394	0.814055	0.403304	0.357682	2	2
Il1rap	3.86241	2.83312	6.11497	13.4296	13.2178	9.38787	6.48372	5.76729	-0.44711	0.662844	1.79784	1.77491	1.2813	0.74732	0.578392	2	2
Cd80	5.86828	5.95776	10.8724	21.4832	20.5793	14.8749	10.3744	8.58843	0.0218323	0.889661	1.8722	1.81018	1.34187	0.822018	0.549457	2	2
Cggbp1	24.1911	25.1621	41.4015	50.2343	37.1571	30.7269	26.311	23.6317	0.056776	0.775207	1.0542	0.619162	0.345026	0.12119	-0.033753	2	2
Usp16	10.5209	12.6639	27.1487	29.9596	17.0422	14.9321	11.041	9.73909	0.267464	1.36762	1.50976	0.695853	0.505159	0.0696127	-0.111399	2	2
Dyrk1a	7.57955	11.8105	14.1042	16.4737	15.6841	12.8975	9.63546	8.02315	0.639886	0.895941	1.11998	1.04912	0.766907	0.346241	0.0820566	2	2
Ets2	23.2817	104.18	252.845	274.225	174.968	110.695	48.2282	34.3482	2.16181	3.44098	3.55809	2.90982	2.24932	1.05068	0.561038	2	2
Mefv	4.90694	6.60933	29.7772	37.5206	22.367	16.6732	13.888	13.9967	0.42968	2.60131	2.93479	2.18848	1.76464	1.50094	1.51219	2	2
Litaf	173.063	251.882	296.754	346.696	268.081	233.479	180.371	146.349	0.541451	0.77797	1.00237	0.631372	0.431995	0.0596701	-0.241884	2	2
Tra2b	42.2436	43.2052	69.3709	103.986	90.203	70.1779	47.1752	41.643	0.0324722	0.715598	1.29958	1.09444	0.732284	0.159296	-0.0206588	2	2
Arhgap31	13.203	8.78838	17.1267	29.2128	28.9939	26.4676	19.6128	17.802	-0.587197	0.375381	1.14573	1.13488	1.00336	0.57093	0.431174	2	2
Hspa13	7.58188	7.41815	12.6787	16.6787	16.2393	14.5073	12.0777	10.7558	-0.0314962	0.741779	1.13738	1.09886	0.936152	0.671718	0.504487	2	2
Samsn1	30.8056	47.1696	106.093	138.081	103.298	77.2335	45.2672	36.7496	0.614665	1.78406	2.16425	1.74555	1.32603	0.555273	0.254536	2	2
Nfkbie	20.2668	23.1019	52.2012	57.9097	39.2885	27.9836	32.2711	40.1482	0.188893	1.36496	1.51469	0.954989	0.465463	0.671124	0.986217	2	2
Rab5a	26.4116	35.1208	44.5596	59.7355	49.7994	42.4009	30.5167	28.1095	0.411154	0.754565	1.17742	0.914957	0.682923	0.208427	0.0898861	2	2
Ezr	18.7109	24.8464	42.0971	59.3988	51.1344	41.379	24.9298	19.1934	0.409158	1.16984	1.66655	1.45042	1.14502	0.413992	0.0367313	2	2
Fpr1	47.0561	52.7356	133.895	248.898	234.326	209.726	181.754	182.654	0.164395	1.50865	2.4031	2.31606	2.15605	1.94953	1.95666	2	2
Tjap1	6.98809	8.15226	13.197	14.6446	13.0007	10.9903	8.13912	8.21363	0.222302	0.91724	1.0674	0.895619	0.653261	0.219975	0.233122	2	2
Rab12	19.5986	23.6352	34.7161	49.8471	43.2338	35.6832	23.6205	23.8772	0.270186	0.824854	1.34676	1.14141	0.864494	0.269289	0.284883	2	2
Eif1a	26.8958	22.5818	41.1595	75.5069	53.5651	44.951	33.5193	26.3876	-0.25222	0.613845	1.48923	0.993912	0.740972	0.317611	-0.0275208	2	2
Srfbp1	5.76011	7.01998	11.2917	15.7643	13.7774	10.6454	8.22333	6.33763	0.285371	0.971094	1.45249	1.25814	0.886062	0.513626	0.137847	2	2
Etf1	37.1492	49.0317	92.6082	124.619	85.8767	63.1252	44.2458	36.9475	0.400384	1.31781	1.74612	1.20894	0.764885	0.252209	-0.00785439	2	2
Hspa9	67.8236	110.883	143.653	208.643	180.915	148.246	83.5824	62.4706	0.709179	1.08273	1.62118	1.41545	1.12813	0.301412	-0.11861	2	2
Cd14	510.659	1360.4	1629.38	1661.82	1336.63	1129.65	762.089	734.52	1.4136	1.67389	1.70233	1.38817	1.14544	0.577599	0.524442	2	2
Trim36	3.29815	7.14641	15.0026	16.417	8.25462	4.30752	3.55144	3.18643	1.11556	2.18548	2.31546	1.32354	0.3852	0.106747	-0.049716	2	2
Txnl1	24.9122	29.1841	47.0498	65.4254	54.9819	46.986	33.4415	28.6092	0.22833	0.917336	1.393	1.1421	0.915379	0.424787	0.199627	2	2
Tshz1	11.5395	7.42625	10.3359	25.301	23.1545	19.3504	15.7502	13.0653	-0.635875	-0.158917	1.13261	1.00471	0.745783	0.448789	0.17916	2	2
Rela	44.0376	52.8129	87.8063	110.38	82.2409	69.5436	50.4993	48.5153	0.262155	0.995589	1.32567	0.90112	0.659182	0.197528	0.139704	2	2
Ehd1	78.0456	111.639	214.155	395.531	383.447	304.482	224.178	185.855	0.516452	1.45627	2.3414	2.29664	1.96397	1.52226	1.25179	2	2
Cdc42bpg	3.08019	4.0776	11.4044	13.2602	11.6398	7.65934	3.984	4.30483	0.404701	1.8885	2.10601	1.91798	1.3142	0.371198	0.482937	2	2
Sf1	44.9944	67.4717	101.526	104.282	92.7571	68.9093	45.6663	39.8258	0.584537	1.17403	1.21267	1.04371	0.614953	0.0213844	-0.176042	2	2
Fas	20.4533	20.8654	31.1129	58.8077	51.8514	53.0838	50.509	48.1455	0.0287789	0.605179	1.52367	1.34205	1.37594	1.30421	1.23507	2	2
Shoc2	11.2016	11.8951	14.8151	24.5643	22.5385	16.8541	11.8099	12.0236	0.0866626	0.403364	1.13286	1.00869	0.589395	0.0762919	0.102164	2	2
Cdc42ep2	20.8693	21.1749	53.6315	92.1886	57.3564	47.2472	42.2187	37.5871	0.0209729	1.3617	2.14321	1.45857	1.17885	1.0165	0.848855	2	2
Stx3	15.8159	13.4591	25.6485	33.2383	24.2252	20.5837	12.7922	11.387	-0.232794	0.697499	1.07147	0.615133	0.380127	-0.306111	-0.473988	2	2
Pik3ap1	47.9752	44.6281	72.637	125.307	107.777	88.6452	70.1926	54.1985	-0.104336	0.598416	1.38511	1.16769	0.885754	0.54903	0.175964	2	2
Smndc1	22.3	28.4108	37.1086	48.5415	43.3576	36.8198	24.7293	21.2576	0.349396	0.73471	1.12217	0.959241	0.723438	0.149178	-0.069065	2	2
Il1rn	357.999	476.978	680.985	950.16	948.063	829.472	619.33	437.438	0.413967	0.927667	1.40821	1.40503	1.21224	0.790753	0.289123	2	2
Ralgds	10.7457	28.5019	78.6645	79.857	42.5918	28.3398	19.2718	19.8416	1.4073	2.87195	2.89366	1.98682	1.39907	0.842732	0.884769	2	2
Hspa5	257.441	579.488	762.308	822.132	581.622	423.29	236.569	239.31	1.17054	1.56613	1.67513	1.17584	0.717405	-0.121981	-0.105361	2	2
Tank	49.4902	35.1974	107.023	135.029	91.6796	67.8998	46.7923	41.0897	-0.491674	1.11271	1.44805	0.889458	0.456264	-0.0808717	-0.268366	2	2
Zc3h15	26.6878	30.5123	44.3311	55.369	45.8721	39.929	30.9528	25.3442	0.193211	0.732139	1.0529	0.781437	0.581257	0.21389	-0.0745248	2	2
2410042D21Rik	12.8276	15.562	23.1181	28.4779	18.7054	14.7547	10.4527	9.83646	0.278776	0.849772	1.15059	0.544204	0.201923	-0.295376	-0.38304	2	2
Spred1	14.6431	11.8141	29.2645	39.2182	28.6309	22.1445	20.5469	18.5526	-0.309711	0.998931	1.4213	0.967352	0.596727	0.4887	0.3414	2	2
Thbs1	1396.18	2210.71	3291.99	3443.88	3163.78	2575.5	1968.82	1744.29	0.663025	1.23748	1.30255	1.18016	0.883368	0.495846	0.321155	2	2
Top1	24.7553	24.82	65.9195	73.765	48.8816	40.0343	31.4131	25.613	0.00376568	1.41297	1.5752	0.981554	0.693499	0.343629	0.0491388	2	2
Rab22a	16.7301	16.2012	23	42.7518	37.2074	28.8457	18.6092	17.9861	-0.0463454	0.459188	1.35354	1.15314	0.78591	0.15357	0.104436	2	2
Optn	3.09577	2.73209	9.44517	16.9225	13.3283	7.54335	2.89414	3.06075	-0.180293	1.60928	2.45057	2.10612	1.28491	-0.0971636	-0.0164131	2	2
Asb6	12.9827	10.0378	13.8168	27.8305	26.911	22.9778	16.993	15.6689	-0.371147	0.0898331	1.10008	1.05161	0.82365	0.38835	0.271313	2	2
Traf1	18.1544	19.9927	61.1737	88.0728	80.421	66.7521	43.8567	37.2551	0.139154	1.75259	2.27838	2.14725	1.87849	1.27248	1.03712	2	2
Zeb2	23.4276	30.2752	58.5882	94.8262	64.3967	43.5882	27.7115	22.5765	0.369927	1.3224	2.01708	1.45878	0.895728	0.242276	-0.0533873	2	2
Stam2	6.62093	7.58859	10.4176	14.2347	13.4161	12.0505	9.05024	7.37709	0.196798	0.653917	1.10431	1.01886	0.863987	0.450922	0.156018	2	2
Nfe2l2	103.896	155.977	225.72	273.106	201.201	157.028	139.548	126.214	0.586193	1.11939	1.39432	0.953497	0.595882	0.425621	0.280732	2	2
Il1b	0.171983	3.08828	10.6868	16.0841	5.97045	2.84648	1.687	0.935801	4.16647	5.95742	6.54723	5.1175	4.04884	3.29412	2.44394	2	2
Bcl2l1	25.4664	20.3864	18.6567	53.2392	38.1444	26.9392	18.6614	15.3531	-0.320988	-0.448901	1.06389	0.582876	0.081112	-0.448538	-0.730065	2	2
Plagl2	6.73343	8.18529	17.5585	33.4673	30.4439	22.9145	13.1995	10.3329	0.281692	1.38276	2.31334	2.17674	1.76685	0.97107	0.617832	2	2
Eif2s2	33.0235	36.6526	46.9983	72.0545	65.9125	59.561	42.0869	36.0653	0.150423	0.509116	1.1256	0.997059	0.850875	0.349878	0.127118	2	2
Tgm2	99.0406	209.69	395.715	423.271	413.589	295.075	146.637	88.9299	1.08217	1.99837	2.09549	2.06211	1.57499	0.566157	-0.155351	2	2
Sdc4	86.1755	169.803	290.876	316.942	251.546	186.431	138.057	119.075	0.978512	1.75505	1.87887	1.54547	1.11329	0.679914	0.466521	2	2
Ptx3	36.7306	133.316	422.866	1039.76	596.751	312.595	131.175	79.6099	1.8598	3.52515	4.82312	4.02207	3.08924	1.83644	1.11597	2	2
Nmd3	10.6683	11.5303	18.6369	28.1267	22.9336	19.4481	12.5518	11.3794	0.1121	0.804832	1.39861	1.10413	0.866299	0.234564	0.0930942	2	2
Sec22b	27.1463	29.9388	42.8569	55.4985	52.834	47.5787	36.7648	34.6967	0.141261	0.658772	1.03169	0.960711	0.80956	0.43757	0.354043	2	2
Eif4e	26.6939	24.08	53.5519	90.3749	65.7099	48.2489	37.6886	33.078	-0.148675	1.00443	1.75941	1.2996	0.853986	0.497618	0.309362	2	2
Bcl10	41.0804	72.2664	117.623	142.959	83.6655	60.4133	40.7583	40.1435	0.814875	1.51765	1.79908	1.02618	0.556416	-0.0113564	-0.0332838	2	2
Siah2	8.04949	13.3322	17.3164	18.3922	13.0127	9.6177	7.30394	7.9044	0.727946	1.10517	1.19212	0.692951	0.256795	-0.140222	-0.0262414	2	2
Tlr2	57.9473	84.5104	215.847	325.795	221.749	166.945	147.5	118.832	0.544387	1.8972	2.49115	1.93611	1.52656	1.3479	1.03611	2	2
Pip5k1a	10.0926	12.6716	21.1786	29.0251	24.6594	17.1337	13.1572	11.9866	0.328301	1.06931	1.524	1.28884	0.763539	0.382555	0.248125	2	2
Gnai3	58.5021	50.4121	73.1767	127.787	125.086	100.293	71.5648	59.4925	-0.214718	0.322896	1.12718	1.09636	0.777661	0.290762	0.0242194	2	2
Nfkb1	28.2857	20.7079	89.4731	204.361	163.418	105.681	56.4285	43.3608	-0.449892	1.66138	2.85298	2.53042	1.90157	0.996351	0.616318	2	2
Metap1	21.0524	18.001	27.2633	43.9949	42.6035	36.4837	34.2357	32.9303	-0.225908	0.372975	1.06335	1.01699	0.793267	0.701517	0.645431	2	2
Pkn2	5.96563	8.57794	10.2589	14.1223	11.3147	8.23499	6.63371	5.56184	0.523957	0.78213	1.24323	0.923452	0.465092	0.153141	-0.101112	2	2
Ube2j1	24.9515	24.1738	40.17	60.6053	48.6172	39.5761	31.4149	26.7728	-0.0456823	0.686992	1.28032	0.96234	0.665503	0.332322	0.101641	2	2
Pabpc4	20.2945	19.7803	38.5091	53.3352	47.294	38.4706	23.5201	17.9145	-0.0370245	0.924111	1.394	1.22057	0.922668	0.212805	-0.179961	2	2
Stk40	9.42112	11.849	17.9401	25.7261	23.7245	18.302	12.0823	10.8763	0.330795	0.929217	1.44926	1.33241	0.958031	0.358925	0.207217	2	2
Marcksl1	59.3325	230.642	417.169	531.345	448.869	263.854	108.953	99.9735	1.95876	2.81374	3.16275	2.9194	2.15285	0.876811	0.752723	2	2
Abca1	17.7028	15.4287	36.6898	47.6588	38.828	29.731	32.3565	33.6504	-0.198361	1.0514	1.42877	1.13312	0.74799	0.870078	0.926646	2	2
Kdm4a	18.7212	25.8419	27.2772	39.4885	32.5221	24.0789	23.2434	23.3811	0.465039	0.543023	1.07676	0.796748	0.363097	0.312148	0.32067	2	2
Zc3h12a	23.8112	85.7905	128.515	183.561	137.849	102.669	87.2058	88.5146	1.84918	2.43222	2.94655	2.53338	2.10829	1.87278	1.89428	2	2
Clic4	92.6683	85.5735	130.794	197.825	177.354	152.113	115.03	96.398	-0.114912	0.497149	1.09408	0.936484	0.714996	0.311862	0.0569273	2	2
Tnfrsf1b	129.387	119.041	310.131	468.988	398.357	341.581	343.772	300.183	-0.120234	1.26119	1.85786	1.62237	1.40054	1.40976	1.21415	2	2
Stim2	5.93153	4.92133	8.64011	11.9806	11.5727	9.05233	7.13184	6.46384	-0.269356	0.542645	1.01422	0.964249	0.609885	0.26587	0.123987	2	2
Cxcl1	19.6413	768.318	1599.4	2509.95	1566.75	902.008	353.388	250.988	5.28974	6.3475	6.99762	6.31774	5.52118	4.16929	3.67566	2	2
Cxcl2	144.538	3218.71	6091.47	6970.11	4579.91	2524.36	846.298	626.465	4.47696	5.39727	5.59166	4.9858	4.1264	2.54972	2.11579	2	2
Pxn	28.9205	29.4357	34.5507	64.5396	50.5369	33.3939	25.6598	28.5953	0.0254744	0.256622	1.15809	0.805245	0.207492	-0.172583	-0.0163145	2	2
Zfp655	9.15153	12.8342	21.9722	24.7954	17.789	14.1722	9.07133	8.11588	0.487909	1.26359	1.43799	0.958901	0.630979	-0.0126989	-0.173265	2	2
Fzd1	10.5027	8.02625	12.9571	22.9574	19.437	13.5496	8.144	7.01846	-0.387962	0.302983	1.1282	0.888045	0.36749	-0.366951	-0.581534	2	2
Ptpn12	41.0516	34.294	65.9528	112.318	96.4601	79.4414	55.8401	47.1947	-0.259482	0.683995	1.45208	1.23249	0.952453	0.443863	0.201186	2	2
Slbp	20.7545	26.611	43.9755	46.0679	34.2176	28.122	21.5638	22.1618	0.358599	1.08328	1.15034	0.721314	0.438275	0.0551873	0.0946509	2	2
Dhx15	40.8472	42.8977	57.8867	90.4843	81.4902	67.9402	50.971	45.047	0.0706631	0.502995	1.14743	0.996389	0.734028	0.319439	0.141194	2	2
Chic2	35.4185	32.9913	74.6231	94.147	70.5859	53.6202	33.3463	29.9361	-0.102417	1.07512	1.41041	0.994877	0.598273	-0.0869764	-0.242617	2	2
Nup54	9.55784	10.3503	14.7176	22.9145	18.056	15.6899	12.0966	9.93566	0.114916	0.622786	1.2615	0.917722	0.71508	0.339845	0.0559312	2	2
Antxr2	21.9759	14.2703	31.8683	54.6656	44.1098	30.8471	17.2668	15.9929	-0.622907	0.5362	1.31471	1.00518	0.489213	-0.347922	-0.458491	2	2
Rilpl2	64.2288	70.6247	77.5236	147.404	136.787	114.88	94.2121	87.9866	0.136952	0.271415	1.19848	1.09064	0.838835	0.552692	0.454063	2	2
Sbds	46.6718	64.4988	89.5915	109.917	90.7918	76.2918	50.2845	42.654	0.466721	0.940811	1.23579	0.960011	0.708977	0.107563	-0.12987	2	2
Usp12	11.9278	10.3839	15.2087	25.5828	24.2489	18.2449	13.6407	12.1465	-0.19998	0.350569	1.10085	1.02359	0.613165	0.19359	0.0262127	2	2
Tes	35.7177	42.2609	63.8142	92.1537	75.7424	59.862	40.8253	39.1291	0.242684	0.837238	1.3674	1.08446	0.745001	0.192824	0.131603	2	2
Tax1bp1	44.2375	47.936	75.3187	107.064	76.9937	62.3692	49.7335	49.3357	0.11584	0.767738	1.27513	0.799471	0.495564	0.168948	0.157362	2	2
Ppp4r2	21.5776	23.2038	49.1408	91.6502	81.3287	57.7412	34.1743	27.177	0.104827	1.18739	2.0866	1.91423	1.42007	0.663377	0.332852	2	2
Irak2	31.6258	54.4742	81.4919	85.9424	60.3758	44.3437	41.0356	38.9068	0.784471	1.36555	1.44227	0.932868	0.487627	0.375774	0.29892	2	2
Il17ra	12.4552	10.7752	26.1597	27.8459	20.0192	14.1975	14.6594	14.2417	-0.209034	1.0706	1.16072	0.684636	0.188889	0.235078	0.193373	2	2
2810474O19Rik	9.5271	9.80245	16.0899	21.6221	18.2693	16.9353	12.4928	9.63901	0.0411052	0.756046	1.1824	0.939312	0.829925	0.390988	0.0168478	2	2
Zc3hav1	18.4655	28.0992	42.697	53.3566	49.7676	45.2559	29.018	23.291	0.605697	1.2093	1.53083	1.43037	1.29327	0.652116	0.33494	2	2
Tgoln1	48.3812	50.7012	77.4789	102.035	93.5309	83.9299	55.0326	41.2796	0.0675733	0.679357	1.07655	0.950997	0.794738	0.18584	-0.229018	2	2
Rybp	6.93052	9.33039	19.5032	22.2998	18.2339	12.68	7.89836	7.23092	0.428974	1.49268	1.686	1.39559	0.871519	0.18859	0.0612156	2	2
Atp6v1e1	185.652	167.046	262.093	375.761	352.552	310.834	253.083	232.831	-0.152355	0.497478	1.01721	0.925235	0.743543	0.44701	0.326682	2	2
Clec4e	145.311	300.297	772.975	1181.34	1127.47	854.132	483.875	390.574	1.04725	2.41128	3.02321	2.95587	2.55532	1.73549	1.42645	2	2
Olr1	22.7964	61.7788	112.524	131.019	88.0951	72.3318	73.3897	64.7991	1.43831	2.30335	2.5229	1.95026	1.66582	1.68677	1.50717	2	2
Dusp16	6.22528	11.2426	39.8802	51.612	36.8853	28.9585	17.1721	15.2503	0.852765	2.67946	3.0515	2.56684	2.21778	1.46386	1.29263	2	2
Ptpre	40.7417	35.0831	62.7592	94.1543	74.5946	58.1593	52.8662	48.1482	-0.21573	0.623321	1.20852	0.872565	0.513504	0.375839	0.240976	2	2
Relb	24.0279	28.2326	59.6314	80.6719	62.6122	45.8981	31.273	32.3316	0.232651	1.31136	1.74736	1.38173	0.933724	0.380207	0.428234	2	2
Nfkbib	12.7865	26.5598	65.8904	100.522	76.9832	47.5494	24.3736	21.7099	1.05462	2.36545	2.97482	2.58992	1.89481	0.930698	0.763732	2	2
Gramd1a	13.7167	27.4446	25.3409	34.039	29.1409	19.0335	14.0563	15.6035	1.00059	0.885534	1.31126	1.08711	0.472607	0.0352835	0.185936	2	2
Mef2a	10.9624	15.148	24.7741	38.8515	28.6711	20.0469	12.9114	11.348	0.466564	1.17627	1.82541	1.38703	0.870815	0.236082	0.0498744	2	2
Nup98	5.84386	8.1783	14.7749	17.8201	13.901	11.2493	8.34026	7.52451	0.484879	1.33815	1.60851	1.2502	0.944842	0.513171	0.364676	2	2
Dennd5a	19.6904	20.9101	31.1431	44.153	35.0717	26.0196	19.7118	20.0079	0.0867075	0.66142	1.16502	0.832815	0.402106	0.0015671	0.0230773	2	2
Gde1	62.2851	73.7626	107.992	129.982	107.408	101.332	77.4411	76.1645	0.244002	0.793965	1.06135	0.786142	0.702131	0.314212	0.290232	2	2
Oat	35.0671	47.3185	74.3592	79.1064	61.3631	47.1509	32.1654	31.2711	0.432286	1.08439	1.17368	0.807253	0.427167	-0.124608	-0.165288	2	2
Tollip	26.371	30.7717	49.476	72.7925	54.6165	41.8486	30.8402	26.0987	0.222652	0.907777	1.46484	1.05038	0.666227	0.22586	-0.0149743	2	2
Cars	9.29076	13.8674	13.3075	22.7963	21.553	16.6703	10.648	10.541	0.577829	0.518371	1.29493	1.21402	0.843412	0.196714	0.182143	2	2
Mt2	269.769	1204.01	1349.01	1507.95	1016.79	692.873	312.793	320.148	2.15805	2.3221	2.48279	1.91423	1.36087	0.213484	0.247014	2	2
Mt1	964.131	1864.79	1888.35	1967.68	1880.79	1664.82	987.943	878.855	0.951712	0.969825	1.02919	0.964038	0.788065	0.0351986	-0.133604	2	2
Herpud1	16.3371	38.039	46.0657	65.5367	39.898	23.5344	19.4523	20.0621	1.21933	1.49554	2.00415	1.28816	0.526619	0.251789	0.296321	2	2
Nfat5	5.88764	4.86981	12.3499	13.1633	12.6733	10.1445	8.28661	7.37975	-0.273824	1.06874	1.16076	1.10603	0.784936	0.493093	0.325882	2	2
Rab11fip1	11.0287	33.2298	98.1192	108.471	69.5049	38.377	22.5572	21.1984	1.59121	3.15327	3.29797	2.65585	1.79898	1.03233	0.942693	2	2
Ciapin1	4.93011	6.54958	15.9065	17.443	11.0468	7.87891	5.49337	5.46917	0.409783	1.68992	1.82296	1.16394	0.676376	0.156072	0.149702	2	2
2400003C14Rik	31.0174	39.2227	57.4366	75.2288	57.9622	51.4606	38.7911	35.4987	0.338611	0.888893	1.27821	0.902035	0.730391	0.322648	0.194688	2	2
Casp4	6.53675	10.4627	41.1315	77.171	58.9199	47.1972	25.7912	16.6771	0.67861	2.6536	3.56141	3.17211	2.85206	1.98023	1.35122	2	2
Icam1	46.6084	68.97	187.162	279.404	174.374	108.56	76.1628	75.3296	0.565379	2.00563	2.58369	1.90352	1.21983	0.708497	0.692627	2	2
Sema7a	5.01951	5.73644	9.25989	10.7183	10.124	6.26265	4.3898	4.74071	0.192609	0.883449	1.09446	1.01216	0.319227	-0.193391	-0.0824434	2	2
Bcl2a1a	56.4418	106.77	227.878	427.444	332.8	215.255	128.792	99.31	0.91967	2.01343	2.9209	2.55982	1.93121	1.19021	0.815175	2	2
Bcl2a1b	154.758	273.729	565.526	1018.3	740.957	478.985	279.781	217.967	0.822734	1.86958	2.71808	2.25938	1.62997	0.854284	0.494096	2	2
Plscr1	13.35	20.356	41.6282	51.0678	29.3799	21.9202	17.724	17.2576	0.608614	1.64072	1.93557	1.13799	0.715421	0.408864	0.370392	2	2
Lrrfip2	22.1068	32.352	40.0637	44.9254	39.602	39.8174	27.5473	21.5427	0.549365	0.857805	1.02304	0.841083	0.848909	0.317421	-0.0372911	2	2
Bcl2a1c	5.91574	12.9245	28.0903	45.0141	38.3496	25.7533	15.3275	10.9491	1.12748	2.24744	2.92775	2.69658	2.12213	1.37349	0.888182	2	2
Rab8b	40.9228	44.3503	108.756	123.927	65.5417	48.8518	40.4201	34.349	0.116039	1.41012	1.59851	0.679508	0.255507	-0.017832	-0.252637	2	2
Mapk6	18.1036	22.2137	45.9214	51.954	44.2036	39.834	30.1342	21.4013	0.295173	1.34289	1.52096	1.28789	1.13772	0.735125	0.241422	2	2
Bcl2a1d	80.0717	138.149	329.869	609.059	481.993	315.761	172.344	125.407	0.786861	2.04253	2.92722	2.58965	1.97947	1.10593	0.647254	2	2
Rasa2	3.93593	4.59834	8.02151	15.2021	11.063	7.66338	5.04498	4.27697	0.224409	1.02717	1.94949	1.49097	0.961276	0.358144	0.119885	2	2
Nck1	20.4405	24.1334	35.2574	41.6939	36.5483	34.5108	26.6167	23.5654	0.239601	0.786496	1.02841	0.838374	0.755617	0.380901	0.20524	2	2
Ptpn23	13.2121	12.7863	34.7789	44.793	42.7782	27.9556	15.9227	14.5621	-0.0472609	1.39635	1.76141	1.69502	1.08128	0.269225	0.140359	2	2
Timp1	6.57648	8.3104	10.2659	13.1834	12.1155	11.1967	11.9966	10.23	0.337602	0.642473	1.00333	0.881466	0.767686	0.867238	0.637419	2	2
Mid1	11.7003	6.43425	22.6248	28.8086	24.951	19.2938	12.4972	12.8927	-0.862702	0.95136	1.29995	1.09255	0.721592	0.0950594	0.140009	2	2
Prkx	8.53833	9.15319	14.3658	18.8909	16.1618	12.3158	9.57657	8.85305	0.100321	0.750613	1.14567	0.920562	0.528485	0.165555	0.0522206	2	2
Gyk	2.56089	2.65202	5.88563	11.2796	10.5474	9.04644	6.89065	4.71046	0.0504464	1.20055	2.139	2.04217	1.8207	1.42799	0.879223	2	2
Rlim	10.0625	14.5212	23.4218	25.3868	18.0718	14.5746	11.5733	10.4637	0.529172	1.21886	1.33509	0.844751	0.534468	0.201812	0.0564043	2	2
Ccl2	2.18255	4.19406	10.9325	21.5353	17.4728	12.0603	5.0207	2.42019	0.942333	2.32454	3.30262	3.00102	2.46618	1.20187	0.149106	2	2
Csf3	0.118438	4.11335	24.258	39.1873	35.6909	21.5338	5.49422	2.68902	5.11811	7.67818	8.37011	8.23528	7.50633	5.53571	4.50488	2	2
Epha4	0.73429	0.723148	6.84402	17.0571	13.8756	7.84625	3.49869	3.04476	-0.022059	3.22042	4.53788	4.24006	3.41758	2.25239	2.05191	2	2
Fst	2.22299	4.98393	13.654	26.9769	19.4376	13.6477	7.51416	4.99062	1.16478	2.61875	3.60115	3.12828	2.61808	1.75711	1.16672	2	2
Hspa1l	9.611	24.1046	39.232	70.1635	31.9228	22.0964	5.31137	5.07022	1.32655	2.02927	2.86796	1.73183	1.20105	-0.855603	-0.922638	2	2
Il12a	0.59349	1.88521	3.62448	13.6514	11.4504	7.99761	7.22898	7.10909	1.66743	2.61048	4.52368	4.27003	3.75227	3.6065	3.58237	2	2
Il6	0.27043	114.528	214.547	233.649	157.17	80.0568	24.3057	12.0965	8.72623	9.63182	9.75487	9.18285	8.20962	6.4899	5.48319	2	2
Ptgs2	1.27805	158.464	476.087	582.802	398.323	231.531	40.4698	16.3445	6.95407	8.54114	8.83292	8.28385	7.50112	4.98483	3.67679	2	2
Tnfsf15	0.515828	4.31936	27.5574	59.4838	19.1011	6.67409	3.47044	2.26566	3.06586	5.73941	6.84946	5.21062	3.69361	2.75016	2.13497	2	2
Fzd7	21.0848	30.9053	21.6089	6.65846	12.6961	14.4961	20.7616	21.7664	0.551651	0.0354223	-1.66294	-0.731818	-0.540539	-0.0222857	0.0458995	2	2
5430435G22Rik	53.0397	40.6951	23.547	14.1506	22.6214	30.6577	40.7508	41.8423	-0.382218	-1.17153	-1.90621	-1.22938	-0.790823	-0.380244	-0.34211	2	2
Rgs16	12.3515	11.331	4.70296	2.46691	5.82751	9.30897	8.7987	7.14105	-0.124411	-1.39305	-2.32391	-1.08373	-0.407993	-0.489324	-0.790478	2	2
Usf1	30.767	35.1607	23.1578	15.117	18.2161	20.7962	25.0137	28.0988	0.19258	-0.409886	-1.02521	-0.75617	-0.565064	-0.298665	-0.130875	2	2
Pycr2	14.2592	8.63511	6.17223	5.59774	9.39835	11.6928	14.4258	14.8361	-0.723607	-1.20803	-1.34898	-0.601414	-0.286273	0.0167583	0.0572189	2	2
D1Ertd622e	30.1364	18.6592	14.5671	13.2059	18.4674	22.4966	22.179	22.758	-0.69162	-1.04879	-1.19032	-0.706526	-0.4218	-0.442313	-0.405133	2	2
Cxcr4	126.473	115.147	83.3383	37.2956	42.6356	49.1304	65.0399	61.5865	-0.135353	-0.601778	-1.76175	-1.5687	-1.36414	-0.959432	-1.03814	2	2
Ilvbl	12.8881	8.58335	7.30387	6.4188	7.23047	8.60177	10.9883	13.8589	-0.586427	-0.819307	-1.00566	-0.833878	-0.583334	-0.230071	0.104773	2	2
Eif4ebp2	25.498	21.7483	21.5918	12.3927	18.082	20.112	24.1562	23.8159	-0.229481	-0.239901	-1.04089	-0.49583	-0.342328	-0.0779906	-0.098459	2	2
Pdxk	21.0298	11.4383	9.0676	4.47245	4.66574	5.13547	12.6371	12.8999	-0.878562	-1.21364	-2.2333	-2.17226	-2.03387	-0.73477	-0.705075	2	2
Lsm7	59.9574	28.8103	27.4963	26.8484	39.4294	37.354	56.6103	61.32	-1.05735	-1.1247	-1.1591	-0.604666	-0.682675	-0.0828733	0.0324199	2	2
Ncln	33.6617	18.3214	17.9785	16.55	20.2697	22.9626	34.021	39.1341	-0.877578	-0.904835	-1.02428	-0.731783	-0.551822	0.0153175	0.217318	2	2
Bloc1s1	74.8079	36.4144	36.4092	33.8603	39.0067	40.5891	55.2953	57.265	-1.03868	-1.03889	-1.1436	-0.939469	-0.882098	-0.436034	-0.385537	2	2
Sfi1	28.6969	15.9355	12.9811	10.5758	15.1626	19.203	25.4025	29.0879	-0.848651	-1.14448	-1.44013	-0.920378	-0.579563	-0.175924	0.0195242	2	2
Trim11	12.5852	11.5208	7.23897	6.05737	8.91628	9.4249	9.00476	10.7429	-0.127487	-0.797872	-1.05496	-0.497214	-0.417179	-0.482968	-0.228345	2	2
Dhrs7b	10.452	7.5076	6.40205	5.13507	5.94222	8.41716	12.3422	13.2514	-0.477355	-0.707173	-1.02532	-0.814705	-0.312374	0.239821	0.342366	2	2
Adap2	9.58848	7.44775	4.51734	3.45417	5.15703	9.24504	11.1733	11.0704	-0.364497	-1.08583	-1.47296	-0.894762	-0.0526226	0.220681	0.207333	2	2
Ppp1r9b	39.4815	26.0086	21.2347	15.5601	28.3041	31.7778	41.3983	40.1485	-0.602188	-0.894753	-1.34333	-0.480166	-0.313158	0.0683947	0.0241693	2	2
Narf	11.4674	17.2648	12.8673	3.89887	6.39014	6.96499	12.2604	14.1614	0.590295	0.166171	-1.55641	-0.843619	-0.719345	0.0964677	0.304426	2	2
Rmnd5b	18.5869	14.1598	10.0477	7.04678	8.63923	9.74326	11.2459	11.8965	-0.392485	-0.887421	-1.39925	-1.10531	-0.93181	-0.724887	-0.643749	2	2
Tbkbp1	11.336	8.21691	4.62676	3.427	6.44057	7.25336	8.60892	11.0104	-0.464244	-1.29284	-1.72589	-0.815651	-0.64419	-0.397007	-0.0420448	2	2
Pip4k2b	12.0033	9.92708	8.26784	5.79858	10.4995	10.1614	12.4278	12.2684	-0.27399	-0.537849	-1.04966	-0.19311	-0.240332	0.0501398	0.031516	2	2
Cpsf3	17.4311	10.4644	8.31615	7.34929	8.37891	11.1098	18.0632	18.3898	-0.736174	-1.06768	-1.24599	-1.05683	-0.649831	0.0513899	0.0772422	2	2
Egln3	235.73	287.314	231.175	75.6857	101.984	151.984	224.331	237.666	0.285493	-0.02815	-1.63904	-1.20879	-0.633216	-0.0715064	0.0118002	2	2
Itpk1	13.014	16.4696	13.9184	5.89517	8.23168	8.03983	12.1809	12.9064	0.339741	0.0969289	-1.14246	-0.660806	-0.694828	-0.0954437	-0.0119778	2	2
Cinp	11.5522	8.00982	6.52507	5.0055	7.14632	8.31049	12.0015	12.7181	-0.528326	-0.824102	-1.20658	-0.692895	-0.475162	0.0550471	0.138716	2	2
Rgs14	13.3671	6.58058	4.09822	2.87151	4.14777	5.10755	7.7157	10.6545	-1.0224	-1.70562	-2.21881	-1.68828	-1.38798	-0.792818	-0.327224	2	2
Grk6	16.8261	12.7262	10.7225	6.81787	9.43955	12.6336	16.4055	19.3459	-0.402899	-0.65006	-1.30331	-0.833911	-0.413435	-0.0365213	0.201327	2	2
Cdk20	14.9223	8.65755	7.23451	6.30918	7.09185	8.45604	10.6167	9.56224	-0.785439	-1.0445	-1.24195	-1.07324	-0.819416	-0.491135	-0.642049	2	2
Lpcat1	9.51168	6.01336	4.53411	3.48138	5.52139	6.2498	10.5194	11.1587	-0.661529	-1.06888	-1.45004	-0.784669	-0.60589	0.14528	0.230397	2	2
Mocs2	17.9055	10.7998	8.68491	8.40462	12.5294	12.7721	20.0713	21.0074	-0.729398	-1.04382	-1.09115	-0.515085	-0.487407	0.164731	0.230495	2	2
Dok3	32.6782	19.2271	15.7159	11.2928	16.0167	16.494	22.0322	28.9544	-0.765187	-1.0561	-1.53293	-1.02875	-0.986387	-0.568715	-0.174546	2	2
Gtf2h2	11.0616	9.58651	9.60109	4.41243	5.23809	7.12463	9.15227	10.763	-0.206482	-0.20429	-1.32591	-1.07845	-0.634673	-0.273359	-0.0394798	2	2
Nt5dc2	60.2262	27.1535	23.1889	18.8172	19.3582	21.2011	29.2141	33.9652	-1.14925	-1.37696	-1.67834	-1.63745	-1.50625	-1.04373	-0.826334	2	2
Parp2	14.0845	9.00378	7.16324	6.95575	9.2288	10.5574	12.1651	12.611	-0.645506	-0.975424	-1.01783	-0.609893	-0.415854	-0.21136	-0.159426	2	2
Arl11	35.4897	17.2015	12.6087	9.56465	13.3628	15.7916	18.0499	19.497	-1.04487	-1.49298	-1.89162	-1.40918	-1.16824	-0.97541	-0.864148	2	2
Dok2	42.2775	23.9671	17.537	12.1393	19.7035	25.7112	44.3531	54.4507	-0.818835	-1.26949	-1.8002	-1.10144	-0.717493	0.0691449	0.365061	2	2
Stab1	22.5161	11.9989	10.6577	6.4992	10.0922	11.9015	18.4903	19.1291	-0.908055	-1.07906	-1.79262	-1.15772	-0.919814	-0.284188	-0.235188	2	2
Prmt5	9.1228	5.27975	4.94958	4.3141	5.65116	7.56397	10.639	10.0895	-0.789007	-0.882171	-1.08042	-0.69093	-0.270333	0.221814	0.145306	2	2
Rabggta	12.6845	10.6275	9.13982	5.61612	7.13596	9.95056	14.4772	16.5778	-0.255264	-0.472829	-1.17542	-0.829887	-0.350217	0.190716	0.386186	2	2
Dpysl2	13.0265	14.8478	11.4342	5.56876	5.69702	8.19459	14.6784	20.0466	0.1888	-0.188094	-1.22602	-1.19317	-0.668706	0.172245	0.621908	2	2
Kctd17	11.6859	11.1224	9.24849	5.31936	5.9643	6.33759	9.03723	12.6529	-0.0713007	-0.337479	-1.13544	-0.970344	-0.882763	-0.370816	0.114699	2	2
Irak4	11.3045	7.06899	5.98279	4.83182	7.23308	8.73021	11.3605	12.9462	-0.677321	-0.918007	-1.22626	-0.644215	-0.372809	0.00712915	0.195632	2	2
Parp10	16.6016	11.6018	10.9099	7.34322	14.2177	19.9956	23.7001	28.5933	-0.516974	-0.605684	-1.17684	-0.223634	0.26836	0.513571	0.784355	2	2
Dnalc4	10.9888	11.9032	9.24146	4.45082	4.99447	6.52698	9.1434	9.53155	0.115316	-0.249841	-1.30389	-1.13763	-0.751546	-0.265231	-0.205251	2	2
Cerk	35.3499	29.5793	23.8314	11.5232	11.9704	13.6087	23.6946	25.957	-0.257118	-0.568842	-1.61716	-1.56223	-1.37718	-0.577148	-0.445582	2	2
Fmnl3	13.1696	10.4916	10.0093	6.00874	8.69003	12.2755	17.7275	16.5161	-0.327977	-0.39587	-1.13208	-0.599778	-0.10143	0.428778	0.326662	2	2
Zfp385a	18.207	14.7476	13.0323	7.29271	9.15854	7.94374	11.8402	14.3129	-0.304013	-0.482402	-1.31997	-0.991304	-1.1966	-0.6208	-0.347177	2	2
Gart	22.0783	10.6077	9.44862	8.19258	10.275	14.2565	23.9785	21.6651	-1.05752	-1.22445	-1.43024	-1.10349	-0.631009	0.119112	-0.0272562	2	2
Mapk14	47.8067	36.4688	30.9131	23.8567	35.3732	35.7231	52.4824	55.1371	-0.39055	-0.628994	-1.00282	-0.434556	-0.420356	0.134621	0.205811	2	2
Abcg1	30.1216	18.0122	14.0009	6.258	6.68092	8.7443	18.2596	20.8514	-0.741824	-1.10528	-2.26702	-2.17268	-1.78438	-0.722143	-0.530654	2	2
Myo1f	157.221	101.688	81.5517	73.3044	82.3661	94.443	143.441	164.774	-0.628644	-0.947007	-1.10082	-0.932671	-0.735278	-0.132336	0.0676947	2	2
Rgl2	37.2872	22.0076	19.3169	18.2215	28.5169	28.7593	28.0542	35.147	-0.760679	-0.948817	-1.03304	-0.386863	-0.374652	-0.410464	-0.0852789	2	2
Mrpl2	29.1122	22.2881	17.5678	14.0569	19.8644	24.0558	29.648	31.3177	-0.38535	-0.72869	-1.05035	-0.551439	-0.275239	0.0263109	0.105354	2	2
Pex6	14.8268	10.9343	10.9331	7.00478	7.84053	9.62726	12.3378	15.6644	-0.439346	-0.439505	-1.0818	-0.919184	-0.62301	-0.265122	0.0792822	2	2
Stk38	29.6686	24.0419	20.3184	13.1434	17.5574	19.4373	27.6683	32.18	-0.303386	-0.54615	-1.1746	-0.756858	-0.610109	-0.100703	0.117227	2	2
Cnpy3	65.1427	42.5033	36.5927	28.0451	31.8188	36.1774	53.7273	65.9707	-0.616029	-0.832048	-1.21585	-1.03372	-0.848515	-0.277948	0.0182219	2	2
Cpt1a	32.2759	19.4637	16.6307	10.7871	11.2569	14.8649	25.887	26.9564	-0.729671	-0.956608	-1.58115	-1.51965	-1.11855	-0.31823	-0.259829	2	2
Lpxn	18.3715	10.863	10.1144	8.46958	10.7057	14.8765	17.7098	16.0984	-0.758047	-0.861059	-1.11711	-0.77909	-0.304434	-0.0529215	-0.190552	2	2
Hhex	12.3157	10.765	7.12038	2.80205	4.24729	5.69848	6.32141	7.42555	-0.19415	-0.790472	-2.13594	-1.53588	-1.11185	-0.96218	-0.729929	2	2
Gda	18.5368	9.86248	10.1178	6.91415	7.96311	7.98956	12.2793	11.2986	-0.91037	-0.873497	-1.42277	-1.21899	-1.2142	-0.594164	-0.714248	2	2
Nek6	29.1622	24.0924	14.4421	11.1999	13.0856	16.6446	28.7777	26.567	-0.275521	-1.01382	-1.38061	-1.15612	-0.809045	-0.0191483	-0.134464	2	2
Ivd	12.4924	8.299	8.7039	5.69325	6.79612	10.9485	16.7399	16.9766	-0.590041	-0.521317	-1.13373	-0.878267	-0.190317	0.42224	0.442497	2	2
Mavs	9.50091	8.68106	6.19104	3.81915	5.99488	7.5815	10.5689	11.4037	-0.130194	-0.617884	-1.31481	-0.664335	-0.325582	0.153688	0.263364	2	2
Rin2	35.9549	30.5306	25.4621	12.5901	15.8231	20.5857	27.3488	24.5265	-0.235932	-0.497837	-1.5139	-1.18416	-0.804546	-0.394711	-0.551847	2	2
Card9	22.2505	22.2914	20.9326	10.8507	12.0787	14.9769	18.781	24.1736	0.00264947	-0.0880862	-1.03605	-0.881373	-0.571099	-0.244564	0.119595	2	2
Wipf1	28.7511	24.3571	21.818	9.95168	12.482	14.3389	20.0338	23.0477	-0.239275	-0.398098	-1.53061	-1.20377	-1.00368	-0.521181	-0.318994	2	2
Dgkz	42.5588	49.1597	40.4701	18.1794	24.171	30.398	45.542	46.1207	0.208019	-0.0726011	-1.22715	-0.81618	-0.485481	0.0977402	0.115957	2	2
E2f1	14.4046	12.6229	9.96016	7.17824	7.96869	10.4313	16.605	21.5549	-0.190486	-0.532289	-1.00483	-0.854115	-0.465611	0.205088	0.581486	2	2
Elmo2	25.1972	20.4611	15.1998	7.39262	8.04732	10.5738	16.5918	17.8631	-0.30038	-0.729211	-1.76911	-1.64668	-1.25277	-0.602793	-0.496281	2	2
Txnip	312.077	335.351	133.621	121.453	153.922	184.462	206.574	211.441	0.10377	-1.22376	-1.3615	-1.0197	-0.758578	-0.595243	-0.561647	2	2
Tnfaip8l2	53.9214	28.752	13.2127	10.2829	14.1618	18.2792	29.7207	39.0753	-0.907196	-2.02893	-2.39061	-1.92885	-1.56066	-0.85939	-0.464601	2	2
Plekho1	104.692	76.5115	52.4049	39.2122	41.0559	45.6	59.4017	73.5602	-0.452403	-0.998378	-1.41678	-1.35049	-1.19905	-0.817575	-0.509154	2	2
Mknk1	23.9199	17.4795	15.9055	8.1953	10.6796	12.4446	18.9587	19.1297	-0.452547	-0.588686	-1.54534	-1.16335	-0.942691	-0.335351	-0.322397	2	2
Runx3	21.4305	28.5393	20.4285	5.90521	8.38735	10.0455	19.5299	21.5472	0.413284	-0.0690822	-1.85961	-1.35338	-1.09312	-0.133981	0.0078349	2	2
Rcc2	28.2624	18.7051	16.1663	13.4601	15.0372	15.5132	22.0895	26.8393	-0.595452	-0.805894	-1.07019	-0.910348	-0.865388	-0.355523	-0.0745369	2	2
Atp13a2	36.4795	28.011	21.5943	14.4884	19.9754	19.641	32.1221	45.1814	-0.381092	-0.756435	-1.33219	-0.868862	-0.893218	-0.18352	0.308643	2	2
Casp9	11.8557	7.99812	5.07153	3.49324	6.18604	8.26187	10.5838	11.2259	-0.567848	-1.22509	-1.76294	-0.938493	-0.521041	-0.163723	-0.0787497	2	2
Rps6ka1	28.5988	20.5989	14.6893	11.3093	12.5437	15.0861	22.968	29.8378	-0.473387	-0.961189	-1.33844	-1.18899	-0.922735	-0.316329	0.0611866	2	2
Ldlrap1	23.0918	19.5796	11.6438	8.73515	13.2766	15.5085	20.2516	20.0336	-0.238029	-0.987819	-1.40248	-0.798495	-0.574321	-0.189345	-0.204959	2	2
Kcnab2	24.331	19.3262	17.523	11.2797	12.0183	13.989	25.8468	30.7622	-0.332238	-0.473546	-1.10907	-1.01756	-0.798503	0.0871901	0.338363	2	2
Klhl5	25.6314	20.8822	19.3061	9.97758	10.1629	13.5591	26.2063	26.7657	-0.295639	-0.408856	-1.36115	-1.3346	-0.918651	0.0320014	0.0624731	2	2
Srd5a3	27.494	14.4215	14.0875	13.7071	14.6202	16.7221	23.0231	26.7296	-0.930896	-0.964701	-1.00419	-0.911154	-0.717361	-0.256035	-0.0406786	2	2
Arl6ip4	35.8449	20.3251	17.3139	16.4708	20.8258	24.6907	31.3124	38.12	-0.818505	-1.04984	-1.12186	-0.783396	-0.5378	-0.195034	0.0887803	2	2
Sap25	46.9303	37.886	25.4781	14.5804	26.4508	24.0411	30.4144	38.6887	-0.308855	-0.881262	-1.68649	-0.827208	-0.965017	-0.625765	-0.278607	2	2
Cnpy4	10.6472	6.24632	5.33035	4.23625	4.80289	4.69701	7.68796	11.1667	-0.769396	-0.998172	-1.32961	-1.1485	-1.18066	-0.469801	0.0687288	2	2
Coro1c	62.5657	45.247	37.9012	30.3737	34.2985	38.8749	55.7513	58.834	-0.46755	-0.723128	-1.04255	-0.867226	-0.686533	-0.166367	-0.0887218	2	2
Ncor2	9.77948	9.00392	10.0085	3.48641	7.63033	8.59503	10.9264	11.4684	-0.119205	0.0333961	-1.48802	-0.358012	-0.186255	0.159988	0.229834	2	2
Taf6	12.4526	9.4069	8.18641	5.75373	7.7174	8.98737	12.1382	12.511	-0.404656	-0.605144	-1.11388	-0.69026	-0.470476	-0.0368925	0.00675011	2	2
Ttyh3	13.1152	11.0146	10.5432	6.25723	9.6682	8.62545	10.0789	13.4068	-0.251823	-0.314927	-1.06764	-0.439921	-0.604568	-0.379902	0.0317251	2	2
Mogs	18.9143	10.7051	9.37902	8.05879	11.0069	13.1696	18.8498	20.1533	-0.821179	-1.01197	-1.23084	-0.781069	-0.522266	-0.00492817	0.0915387	2	2
Ing4	27.5781	22.1506	14.5378	8.73442	12.6233	13.9771	17.9273	22.2983	-0.316177	-0.923714	-1.65874	-1.12743	-0.980458	-0.621365	-0.306589	2	2
Hk2	51.8561	57.1495	48.2426	15.9042	37.6321	42.4046	54.5431	54.6774	0.140227	-0.104206	-1.70511	-0.46255	-0.290293	0.072883	0.0764309	2	2
Htra2	36.7963	21.8524	14.3927	9.41904	12.7715	17.5591	33.0975	38.7001	-0.751769	-1.35422	-1.96591	-1.52663	-1.06734	-0.152838	0.0727766	2	2
Spr	21.9121	12.878	9.63996	8.68692	13.9748	15.9029	20.9007	23.2892	-0.766819	-1.18463	-1.33481	-0.6489	-0.462438	-0.0681765	0.0879333	2	2
Rab11fip5	17.8929	23.5542	17.6646	7.62443	7.70522	9.01803	11.6243	13.5601	0.396597	-0.0185262	-1.23069	-1.21548	-0.988503	-0.622243	-0.400019	2	2
Apobec1	35.2344	24.1194	17.4059	8.46209	9.65445	12.243	23.0023	22.7502	-0.546791	-1.01741	-2.0579	-1.86772	-1.52503	-0.615207	-0.631105	2	2
Ptpn6	68.702	49.3373	37.985	30.8912	58.2137	67.3495	95.0791	99.184	-0.477673	-0.854922	-1.15316	-0.238993	-0.0286849	0.468776	0.529755	2	2
Suv420h2	20.0943	25.8371	17.6709	5.31968	5.86484	6.63623	11.1339	16.8808	0.362658	-0.185411	-1.91737	-1.77662	-1.59835	-0.851827	-0.251403	2	2
Xrcc1	11.1166	8.37265	6.80845	5.41356	6.80634	7.14414	8.78188	10.4639	-0.408959	-0.707317	-1.03807	-0.707764	-0.637883	-0.340114	-0.087295	2	2
Arrb1	55.6194	55.7198	52.0357	21.1763	22.3147	28.9058	42.4403	47.4715	0.0026019	-0.0960864	-1.39314	-1.31759	-0.944229	-0.390153	-0.228527	2	2
Numa1	15.9376	16.1387	15.7565	7.54387	8.04617	10.2682	14.2524	14.9713	0.01809	-0.0164873	-1.07906	-0.98606	-0.634251	-0.16123	-0.0902349	2	2
Il21r	45.8401	38.5827	26.0969	12.7767	31.278	46.7262	64.2952	50.4966	-0.248656	-0.812732	-1.84309	-0.551462	0.0276215	0.488101	0.139576	2	2
Cd151	36.6576	20.0878	15.287	13.8646	21.104	24.3538	32.6333	34.0781	-0.867793	-1.26181	-1.40271	-0.796596	-0.589965	-0.167767	-0.105267	2	2
Fes	49.9041	27.2048	22.423	20.0434	26.7475	27.9799	35.897	46.6681	-0.875297	-1.15418	-1.31603	-0.899754	-0.834768	-0.475295	-0.0967216	2	2
Inppl1	20.521	16.3103	12.4224	8.60803	14.198	14.7461	17.8248	18.8014	-0.331318	-0.724157	-1.25335	-0.531413	-0.476768	-0.203215	-0.126261	2	2
Sh2b1	10.7794	11.691	9.37105	5.10297	8.52925	8.39416	9.5375	12.0587	0.117121	-0.201994	-1.07887	-0.337786	-0.360819	-0.176594	0.161798	2	2
Maz	50.5529	29.5894	22.3098	22.2194	38.2418	36.4634	38.858	43.4208	-0.772713	-1.18012	-1.18597	-0.402643	-0.471345	-0.379582	-0.219408	2	2
Mapk1ip1	8.91243	17.7563	11.1111	3.33024	3.77436	4.4368	6.16729	7.60611	0.99444	0.318111	-1.42019	-1.23959	-1.0063	-0.531182	-0.22866	2	2
Irf2	45.368	42.8143	33.1095	9.7617	19.2196	27.6896	37.9587	38.0992	-0.0835823	-0.45443	-2.21647	-1.2391	-0.712331	-0.257244	-0.251914	2	2
Irf8	73.5437	65.0666	49.3895	33.7609	55.4665	63.2631	76.4183	76.156	-0.176685	-0.574397	-1.12325	-0.406985	-0.217238	0.0553164	0.0503559	2	2
Cdk10	12.4479	9.87249	8.51301	5.84276	7.43544	8.61491	13.0224	15.6338	-0.334416	-0.548161	-1.09118	-0.743412	-0.530995	0.065093	0.328766	2	2
Ankrd37	69.9366	70.5475	26.1003	19.2132	42.3717	36.279	59.153	66.4798	0.0125473	-1.42198	-1.86395	-0.722947	-0.946913	-0.241596	-0.0731316	2	2
Mast3	16.51	17.7087	11.4576	3.38573	6.63259	8.30896	10.9926	14.2043	0.101118	-0.527035	-2.2858	-1.3157	-0.9906	-0.586807	-0.217012	2	2
Fhod1	12.14	6.17277	4.40303	3.78024	7.22441	8.10629	12.3401	16.0775	-0.975778	-1.4632	-1.68322	-0.748817	-0.582655	0.0235857	0.405275	2	2
Irf2bp2	49.9173	50.7863	22.1432	8.07491	22.5747	30.5131	47.9472	53.7264	0.0248995	-1.17268	-2.62802	-1.14483	-0.710111	-0.0580933	0.106091	2	2
Hyal1	12.8547	12.083	8.95258	5.45165	6.42833	9.31704	10.2061	11.6495	-0.0893172	-0.521921	-1.23753	-0.99978	-0.464352	-0.332864	-0.142028	2	2
Pfkfb4	14.5394	10.2661	5.56323	2.9262	6.51233	8.79701	12.7884	16.1421	-0.50208	-1.38597	-2.31287	-1.15872	-0.724883	-0.185132	0.150861	2	2
Exosc7	18.046	14.2122	11.383	7.28839	12.2982	13.7686	16.002	16.5837	-0.344549	-0.664798	-1.30801	-0.553232	-0.390297	-0.173427	-0.121913	2	2
Yipf2	11.1649	7.6313	6.60972	5.39279	7.96988	8.27234	10.7313	11.469	-0.54897	-0.756309	-1.04987	-0.48634	-0.432603	-0.0571455	0.0387693	2	2
Fli1	13.2142	9.43359	9.24733	3.56265	6.45115	8.54831	12.4955	12.0202	-0.48621	-0.51498	-1.89107	-1.03446	-0.628378	-0.0806805	-0.136628	2	2
Fbxo9	13.0287	7.90346	8.25804	6.04707	6.7598	9.44485	12.5163	12.4131	-0.721137	-0.657822	-1.10738	-0.946641	-0.464093	-0.057885	-0.0698297	2	2
Mid1ip1	23.2119	19.7915	11.2752	9.40422	12.2245	15.0405	17.3941	19.0541	-0.229984	-1.04171	-1.30348	-0.925089	-0.626012	-0.416267	-0.284763	2	2
Sash3	24.24	17.0176	12.3587	5.0828	5.25259	7.02381	13.7577	19.1924	-0.510362	-0.971863	-2.25369	-2.20629	-1.78706	-0.81715	-0.336855	2	2
Was	33.0025	18.9826	17.6522	14.749	24.7683	28.8501	37.8818	40.2628	-0.797898	-0.902727	-1.16196	-0.41408	-0.193999	0.19893	0.286872	2	2
Btk	24.7326	18.1043	14.6425	11.3258	16.7775	19.211	23.07	22.9393	-0.450082	-0.756252	-1.1268	-0.559886	-0.364481	-0.100396	-0.108593	2	2
Tlr8	10.0353	8.16545	7.79332	4.72615	5.97981	7.45455	10.8176	11.2004	-0.297479	-0.364774	-1.08635	-0.746912	-0.428891	0.108297	0.158467	2	2
Lyl1	14.2951	9.82411	5.09577	2.82392	3.55953	3.89116	8.02011	12.5597	-0.541122	-1.48815	-2.33975	-2.00576	-1.87725	-0.833827	-0.186719	2	2
Tifab	52.222	27.8113	9.18923	2.45119	10.2478	15.7139	36.071	41.7462	-0.908987	-2.50664	-4.4131	-2.34934	-1.73262	-0.533818	-0.323013	2	2
Map3k5	6.22682	2.93623	4.13461	10.3224	15.617	12.6408	8.696	7.79358	-1.08453	-0.590744	0.729211	1.32655	1.02152	0.481856	0.323791	3	2
Mina	10.1147	4.97079	5.73465	12.2264	21.3857	20.3089	18.2565	13.48	-1.02491	-0.818676	0.273546	1.08019	1.00566	0.851957	0.414367	3	2
Slfn8	3.8647	1.4637	3.30424	10.6729	12.5259	11.1081	7.66263	6.21577	-1.40074	-0.226038	1.46552	1.69649	1.52318	0.987483	0.685577	3	2
Map4k4	20.2926	24.5132	37.2832	50.5006	52.4317	39.5156	26.6151	24.5476	0.272605	0.877572	1.31535	1.36949	0.961469	0.391291	0.274628	3	2
Tpp2	12.3664	13.4398	18.2089	23.7968	25.87	22.718	16.6263	13.7802	0.120086	0.558218	0.944342	1.06485	0.87741	0.427042	0.156171	3	2
Bzw1	72.4639	51.5601	78.8882	131.782	145.291	128.567	84.9231	69.229	-0.491007	0.122547	0.862819	1.00361	0.827186	0.228895	-0.0658859	3	2
Wnt6	3.17223	3.48111	3.83072	10.21	17.3183	11.7022	8.02939	10.284	0.13405	0.272118	1.68641	2.44873	1.88321	1.33979	1.69683	3	2
Ube2f	36.7437	29.7454	41.4302	71.6426	73.6009	69.5944	53.4633	45.9498	-0.30483	0.173186	0.963321	1.00223	0.921474	0.541052	0.322562	3	2
Mapkapk2	91.6438	112.791	207.171	318.847	412.587	347.777	204.025	159.038	0.299543	1.17671	1.79876	2.17059	1.92405	1.15464	0.795262	3	2
Ikbke	24.4726	17.2878	30.4927	81.2065	109.829	90.7651	63.2502	55.4222	-0.501413	0.317297	1.73043	2.16602	1.89097	1.3699	1.1793	3	2
Zbtb7a	14.5989	11.8845	16.8244	33.1325	35.5414	22.3639	16.9046	17.9142	-0.296778	0.204695	1.18239	1.28364	0.615312	0.211556	0.295244	3	2
Txnrd1	219.414	195.235	391.388	607.818	652.387	597.89	422.217	339.131	-0.168444	0.834944	1.46998	1.57207	1.44622	0.944329	0.628187	3	2
Arl1	70.8209	64.4067	96.296	144.434	154.998	148.734	122.071	92.1244	-0.136964	0.443301	1.02816	1.13	1.07049	0.785473	0.379408	3	2
Eea1	11.0548	11.5495	18.3957	25.1615	27.7196	24.378	14.405	10.3359	0.0631575	0.734696	1.18655	1.32623	1.14091	0.381897	-0.0970089	3	2
Tab2	23.3104	27.3679	33.6374	46.2722	47.7342	38.4609	28.6567	25.4379	0.231511	0.529092	0.989172	1.03405	0.722419	0.297899	0.126006	3	2
Nfyb	7.7635	9.21278	11.3444	15.4993	17.1184	14.0244	8.56697	8.27796	0.246929	0.547201	0.997424	1.14077	0.85316	0.142078	0.0925681	3	2
Irak3	23.4845	17.5395	37.5616	83.2454	88.4135	86.023	77.9107	73.9684	-0.421101	0.67755	1.82566	1.91256	1.87301	1.73011	1.6552	3	2
Gas7	13.711	11.4736	33.3499	67.8384	70.2908	47.0924	34.2749	28.5832	-0.257016	1.28235	2.30677	2.358	1.78016	1.32182	1.05983	3	2
Lrrc59	56.9651	41.103	54.9013	88.8761	113.975	110.443	91.2417	81.2777	-0.470835	-0.053238	0.641717	1.00057	0.955152	0.679615	0.512781	3	2
Mllt6	14.07	12.324	16.7467	33.8172	48.4192	35.1821	20.0115	19.0026	-0.191152	0.251255	1.26513	1.78296	1.32222	0.508207	0.433574	3	2
Purb	7.5673	5.63083	7.85609	11.645	18.2742	15.7188	11.3461	8.74816	-0.426431	0.0540328	0.62186	1.27196	1.05464	0.584346	0.209201	3	2
Supt6h	20.1542	19.1214	27.3279	35.0526	40.619	38.3218	27.8739	22.1928	-0.0758924	0.439294	0.798441	1.01107	0.927085	0.467834	0.139011	3	2
Mafg	34.5772	28.7812	39.9272	59.4945	75.5524	68.8282	53.3794	47.5066	-0.264694	0.207551	0.782935	1.12766	0.993179	0.626462	0.458307	3	2
Rab10	44.0188	39.3563	56.2289	100.075	121.539	110.385	81.2607	66.5968	-0.161525	0.353192	1.18489	1.46523	1.32635	0.884438	0.597333	3	2
Sdc1	56.6493	66.1112	88.4149	107.019	116.421	98.2429	96.6497	100.762	0.222837	0.642231	0.917737	1.03922	0.794295	0.770707	0.830822	3	2
Hsp90aa1	110.045	97.4606	149.793	235.609	237.468	203.645	145.414	124.432	-0.175203	0.444877	1.0983	1.10964	0.887963	0.402073	0.177264	3	2
Eaf1	31.4093	31.3153	38.8131	51.354	69.0536	68.213	49.8108	39.7896	-0.00432409	0.305352	0.709285	1.13652	1.11885	0.665267	0.3412	3	2
Wapal	13.2851	15.8296	20.9679	28.8579	29.2094	23.5913	16.1219	14.6792	0.252816	0.658373	1.11916	1.13662	0.828446	0.279213	0.143964	3	2
Kctd9	5.13205	4.59706	6.38073	10.6472	11.958	10.3525	6.72226	5.91972	-0.158824	0.314186	1.05287	1.22037	1.01237	0.389411	0.205994	3	2
Zc3h13	6.22277	6.23582	7.38628	10.3707	13.8244	13.1789	10.0694	8.93167	0.00302236	0.247291	0.736884	1.15159	1.0826	0.694349	0.521373	3	2
Ipo5	18.3444	14.9165	17.0305	29.2802	38.2892	37.5277	31.5938	24.1316	-0.298431	-0.107219	0.674586	1.0616	1.03262	0.784302	0.395584	3	2
Slc39a14	6.45199	4.80627	9.55023	23.6801	28.7746	21.1483	19.758	16.0587	-0.424827	0.565791	1.87586	2.15698	1.71273	1.61462	1.31554	3	2
Acvr1b	11.7531	10.5046	9.24618	16.8603	27.3571	24.5139	26.4132	26.2283	-0.16202	-0.346112	0.520589	1.21887	1.06056	1.16822	1.15808	3	2
Slc11a2	13.6558	10.6898	18.0915	47.9816	57.9156	56.8309	47.8168	38.7541	-0.353279	0.405798	1.81297	2.08444	2.05716	1.808	1.50484	3	2
Socs1	4.49808	8.00007	17.666	38.6084	45.8299	35.8243	29.6119	32.8235	0.830703	1.97359	3.10153	3.34891	2.99356	2.7188	2.86735	3	2
Abcc5	47.5954	36.5415	53.5035	92.0144	120.87	118.271	100.931	99.9355	-0.381286	0.168811	0.951038	1.34456	1.3132	1.08448	1.07018	3	2
Cd200	7.46507	6.86816	7.97158	14.9603	16.6506	15.4632	13.241	12.3488	-0.120232	0.0947099	1.00291	1.15735	1.05061	0.826784	0.726143	3	2
Rps6ka2	5.85752	7.05574	9.83295	28.6671	33.8986	24.143	8.72007	6.53587	0.268507	0.747334	2.29103	2.53286	2.04324	0.57405	0.158089	3	2
Sod2	78.6212	95.6944	218.866	397.102	477.833	462.119	414.106	359.214	0.283516	1.47706	2.33652	2.60352	2.55527	2.39701	2.19185	3	2
Clcn7	17.8064	15.1427	29.8451	44.2589	45.5484	37.3709	30.5673	28.7147	-0.233773	0.745098	1.31357	1.355	1.06952	0.779593	0.689394	3	2
Ebi3	18.8319	26.5469	30.585	40.1479	41.4071	38.2071	37.2556	40.2226	0.495365	0.699646	1.09215	1.1367	1.02066	0.984279	1.09483	3	2
Rhoq	14.2728	16.4196	20.5654	40.0375	59.9537	45.6291	34.8216	32.9442	0.202151	0.526951	1.48808	2.07058	1.67669	1.28671	1.20676	3	2
Foxp4	13.8825	12.5349	27.2314	37.2532	45.9878	32.1219	25.2564	30.2337	-0.147317	0.972004	1.4241	1.72798	1.21029	0.863382	1.12289	3	2
Pigf	14.4799	13.1881	14.2207	22.6452	29.7469	27.5385	22.7289	22.737	-0.134815	-0.0260592	0.645154	1.03869	0.927398	0.650476	0.65099	3	2
Pstpip2	24.1008	18.5215	38.0417	55.0173	58.9839	49.7528	49.6477	42.2016	-0.37988	0.658501	1.1908	1.29124	1.0457	1.04265	0.808217	3	2
Fam13b	4.41254	6.43189	8.0537	11.3733	13.1471	9.66173	5.80196	4.4906	0.543633	0.868042	1.36597	1.57506	1.13067	0.394931	0.0252989	3	2
Jak2	17.3438	21.3904	35.3216	105.996	118.944	90.7712	69.5322	57.8578	0.302543	1.02613	2.61152	2.77779	2.38781	2.00326	1.73809	3	2
Casp7	10.7321	13.1724	13.3353	18.1256	23.1836	20.6039	18.0055	18.6268	0.295586	0.313318	0.756096	1.11117	0.940985	0.746505	0.795447	3	2
Ccdc88b	19.4666	16.3574	31.2269	38.1384	48.4527	37.1154	26.8984	34.4155	-0.251057	0.681788	0.970243	1.31558	0.931017	0.466519	0.822058	3	2
Stip1	43.8391	34.5206	48.3407	78.7719	89.9883	81.1626	60.2107	57.5036	-0.344761	0.14102	0.845463	1.03752	0.888597	0.457802	0.391434	3	2
Blnk	8.97831	6.24336	5.76841	18.6361	27.1686	25.7179	24.1023	22.5949	-0.524121	-0.63827	1.05358	1.59742	1.51826	1.42466	1.33148	3	2
Mgea5	25.1157	27.0545	36.8348	49.7393	52.5979	44.0467	25.5369	19.6363	0.107279	0.55248	0.985797	1.06642	0.810444	0.0239939	-0.355066	3	2
Psd4	22.1865	15.5816	14.5917	40.6398	44.5826	37.0247	24.8858	20.7064	-0.509839	-0.604534	0.873211	1.0068	0.738806	0.165641	-0.0996053	3	2
Gpd2	6.60774	7.73852	10.6812	16.6361	18.3029	16.1916	14.156	13.2485	0.227901	0.692845	1.33209	1.46984	1.29302	1.09918	1.0036	3	2
Pkp4	7.18274	6.36902	7.70763	16.2746	20.5326	16.0928	11.4238	8.62963	-0.173463	0.101753	1.18002	1.51531	1.16381	0.669436	0.264764	3	2
Celf1	6.63227	5.99509	8.28023	13.5433	15.5541	14.064	11.1138	9.45101	-0.145721	0.320168	1.03	1.22972	1.08443	0.744778	0.510966	3	2
Hck	38.9251	25.5884	27.2212	74.6296	113.22	105.921	98.5068	87.7458	-0.605211	-0.51597	0.939047	1.54036	1.44422	1.33952	1.17263	3	2
Src	14.1252	10.0113	18.0532	37.9867	41.8216	29.5506	25.11	25.7872	-0.496642	0.353983	1.42722	1.56598	1.06492	0.829991	0.868384	3	2
Cd40	2.32601	4.03861	13.158	27.8082	29.493	21.8081	11.3606	8.64256	0.796002	2.50001	3.57958	3.66444	3.22893	2.28811	1.8936	3	2
Surf4	109.132	113.135	166.623	253.283	257.444	232.236	160.729	138.156	0.0519711	0.610513	1.21468	1.23818	1.08952	0.558556	0.340224	3	2
Ntng2	6.92361	12.3394	20.4691	44.6337	86.0876	81.8697	51.6016	41.1107	0.833676	1.56385	2.68854	3.63621	3.56373	2.89782	2.56992	3	2
Ptges	6.98663	10.6965	28.0438	76.278	103.315	94.001	72.5236	66.1721	0.61447	2.00501	3.4486	3.88631	3.75001	3.37578	3.24355	3	2
Ptprj	26.0158	16.15	25.1221	53.5388	66.0006	56.3971	53.7853	45.0744	-0.687854	-0.050431	1.0412	1.34309	1.11623	1.04782	0.79292	3	2
Cd82	49.6915	52.3231	71.4489	89.8776	102.982	83.7716	64.8568	55.9697	0.0744489	0.523913	0.854963	1.05132	0.753462	0.384259	0.171647	3	2
Hipk3	14.9814	11.5504	18.4618	30.9001	34.0749	27.5725	20.3768	15.5848	-0.37523	0.301371	1.04444	1.18554	0.880058	0.443755	0.0569672	3	2
Cables2	8.06711	6.01121	6.04501	14.3986	19.0852	17.0331	11.5323	9.46279	-0.424397	-0.416307	0.835805	1.24233	1.07822	0.515556	0.230214	3	2
Notch2	17.446	15.6244	19.7477	29.8508	36.0986	31.3551	28.5205	24.1034	-0.159096	0.178788	0.774873	1.04905	0.845804	0.709103	0.46634	3	2
Slc16a1	6.31934	7.09311	9.38623	14.6357	19.0022	18.7475	15.0922	10.6179	0.166644	0.570772	1.21165	1.58832	1.56885	1.25596	0.748653	3	2
Slc7a11	80.5739	52.6631	177.885	334.864	375.449	317.315	212.586	161.506	-0.61352	1.14256	2.05519	2.22023	1.97753	1.39966	1.0032	3	2
Kpna4	36.2113	37.409	62.1624	74.481	89.3329	81.8862	59.2647	44.7847	0.0469454	0.779602	1.04043	1.30275	1.17718	0.710733	0.306566	3	2
Lmo4	39.9497	39.3464	82.7136	165.181	202.473	178.442	162.864	187.588	-0.021953	1.04994	2.04779	2.34147	2.1592	2.02741	2.23131	3	2
Slc44a1	6.86452	6.2396	7.24115	14.8561	19.2843	17.7197	13.6659	10.8382	-0.137705	0.07706	1.11382	1.4902	1.36812	0.99335	0.658894	3	2
Slc31a1	19.1261	20.6689	33.4251	52.8964	67.7427	63.9193	63.5741	55.6875	0.111919	0.805389	1.46763	1.82452	1.74071	1.7329	1.54181	3	2
Fhl3	24.3901	14.355	13.9919	43.9768	54.254	48.0876	41.958	41.0074	-0.764742	-0.801704	0.850447	1.15343	0.979369	0.78265	0.749589	3	2
Sfpq	51.4228	27.1461	58.9496	96.5517	120.363	91.1321	62.64	49.9473	-0.921663	0.197074	0.908893	1.22691	0.825551	0.284676	-0.0420015	3	2
Rnf11	31.1375	26.4405	39.4615	63.1361	74.542	62.6313	39.0075	30.7917	-0.235904	0.341793	1.01981	1.2594	1.00823	0.325098	-0.0161116	3	2
St3gal3	8.72516	11.0659	11.35	10.0532	18.6508	16.9291	12.5716	12.4154	0.342867	0.379439	0.204401	1.09598	0.956252	0.526915	0.508877	3	2
Agtrap	16.6066	16.49	22.2447	24.7975	33.7068	31.4018	29.3211	31.5184	-0.0101653	0.421705	0.578438	1.02128	0.919091	0.820182	0.924438	3	2
Dnajb6	52.783	77.3658	84.7914	98.791	109.92	98.9679	66.6478	57.0314	0.551623	0.683845	0.904306	1.05831	0.906887	0.336484	0.111683	3	2
Ppp1cb	34.4859	39.958	67.3345	107.481	109.226	79.3966	46.1564	40.5338	0.212478	0.965339	1.64	1.66324	1.20307	0.420524	0.233119	3	2
Cd38	12.779	26.5531	54.9621	92.121	117.012	106.445	106.742	108.949	1.05511	2.10466	2.84976	3.19481	3.05826	3.06228	3.09181	3	2
Cxcl3	1089.43	1290.19	2541.74	5684.42	7171.78	6451.39	4034.12	3300.91	0.24401	1.22224	2.38344	2.71876	2.56604	1.88868	1.59929	3	2
Mtf2	6.08426	5.19109	8.73297	19.0791	22.2791	16.7089	10.9487	9.16627	-0.229044	0.521391	1.64884	1.87254	1.45746	0.847606	0.591253	3	2
Pcgf3	5.34908	4.33968	6.37626	12.0782	12.4095	10.0053	8.18831	7.3019	-0.301702	0.25342	1.17504	1.21408	0.903402	0.614275	0.448981	3	2
Setd8	43.6982	30.1428	44.8318	91.7795	98.4567	84.9169	72.949	60.738	-0.53576	0.0369486	1.0706	1.17192	0.958478	0.739314	0.475026	3	2
Dtx2	6.30471	4.06732	7.15187	26.1072	32.22	28.1025	18.1622	14.9373	-0.632352	0.181891	2.04995	2.35345	2.1562	1.52644	1.24442	3	2
Fscn1	16.6645	17.8966	24.3058	50.3111	89.0289	64.3316	34.992	26.1003	0.102907	0.544523	1.5941	2.4175	1.94875	1.07025	0.647288	3	2
Cyth3	8.25033	6.85528	8.02034	25.2619	25.7621	20.7318	11.5977	9.18463	-0.267236	-0.0407884	1.61444	1.64273	1.32932	0.491315	0.15477	3	2
Met	25.3064	17.8515	37.4052	113.813	126.787	97.6254	50.98	39.9146	-0.503457	0.563737	2.16909	2.32483	1.94775	1.01043	0.657414	3	2
Slc6a12	10.9759	5.70048	13.6609	31.1403	35.9505	32.2401	30.4824	31.4205	-0.945184	0.315713	1.50444	1.71167	1.55452	1.47364	1.51737	3	2
Mtpn	108.808	100.97	157.732	243.967	248.002	222.46	173.662	139.476	-0.107858	0.535691	1.1649	1.18857	1.03176	0.674497	0.358232	3	2
Mthfd2	20.376	26.2974	28.7634	46.8818	56.1711	50.4431	36.7663	35.0485	0.368049	0.497363	1.20216	1.46296	1.30779	0.851513	0.782482	3	2
Rassf4	44.5574	30.2035	39.2484	141.634	174.371	152.164	133.669	126.436	-0.560949	-0.183031	1.66843	1.96842	1.77189	1.58493	1.50467	3	2
Ppfibp2	13.448	11.6545	13.7485	33.2679	59.4014	57.8463	41.9494	27.8015	-0.206505	0.0318826	1.30674	2.14311	2.10483	1.64126	1.04777	3	2
Ampd3	18.0878	11.4047	31.1116	55.642	60.7626	60.025	41.5192	34.2071	-0.665388	0.782436	1.62116	1.74817	1.73055	1.19876	0.919279	3	2
Fus	118.573	109.2	161.218	207.077	247.375	196.639	128.097	110.846	-0.118803	0.443237	0.804392	1.06092	0.729774	0.111461	-0.0972188	3	2
Vasp	71.3329	60.4111	77.3497	140.552	189.095	146.121	92.9786	100.893	-0.239754	0.116828	0.978464	1.40647	1.03452	0.382331	0.500187	3	2
Bcl3	28.1434	25.1841	35.1849	69.9316	71.6829	62.2429	55.9125	55.9618	-0.160283	0.32216	1.31315	1.34883	1.14511	0.990374	0.991646	3	2
Furin	29.6016	36.4183	48.0682	51.4624	63.7886	49.0585	39.4517	37.6081	0.298988	0.699408	0.797844	1.10762	0.728828	0.414412	0.345368	3	2
Eif4g2	75.7359	66.5472	109.458	156.198	175.393	151.678	113.658	93.0632	-0.186599	0.531328	1.04433	1.21154	1.00196	0.58565	0.297233	3	2
Zfp703	20.2367	28.5831	36.7847	35.0584	44.5903	37.2606	27.5351	27.4652	0.498188	0.862132	0.792786	1.13976	0.880677	0.444298	0.440631	3	2
Acsl1	40.5187	23.648	72.7361	152.087	189.067	182.934	165.283	152.69	-0.77687	0.844084	1.90824	2.22224	2.17466	2.02828	1.91395	3	2
Lpcat2	23.5944	15.7704	21.1288	40.0831	47.2645	41.0813	29.7494	27.5329	-0.581225	-0.159234	0.76455	1.00231	0.800037	0.334416	0.222712	3	2
Ccl22	70.8399	123.829	163.28	300.416	377.053	336.084	302.937	234.155	0.805715	1.20471	2.08433	2.41213	2.24619	2.09638	1.72483	3	2
Znrf1	12.6969	9.96756	13.3425	21.1485	28.7441	22.9634	15.2191	13.3741	-0.349164	0.0715527	0.736079	1.17879	0.85486	0.261407	0.0749655	3	2
9030425E11Rik	16.3497	8.46181	12.7254	33.7468	53.1017	50.9308	52.4526	49.801	-0.950226	-0.361553	1.04549	1.69949	1.63927	1.68175	1.60691	3	2
Limd1	21.3108	20.1885	28.8225	50.34	51.4452	44.562	31.9431	28.3497	-0.078051	0.435611	1.24012	1.27145	1.06423	0.58392	0.411749	3	2
Kdm5c	11.1977	13.4801	17.0033	20.2319	23.3707	19.3954	14.2751	12.6903	0.267629	0.602612	0.853429	1.0615	0.792512	0.350298	0.180524	3	2
Mid1	32.3093	30.768	80.7149	74.7048	106.615	67.8357	41.9528	34.7904	-0.0705188	1.32089	1.20925	1.72239	1.0701	0.376818	0.10674	3	2
Cdv3	50.8047	42.0258	61.7137	96.8691	110.567	91.7229	61.3495	52.2055	-0.273687	0.280629	0.931075	1.12189	0.85232	0.27209	0.0392398	3	2
Fabp3	0.0663117	0.482015	3.40743	8.47921	10.2502	10.0457	9.93615	5.86359	2.86174	5.68328	6.99852	7.27217	7.2431	7.22728	6.46638	3	2
Gm5416	7.5655	5.68947	11.0747	22.9207	47.1572	45.1406	30.4125	18.1197	-0.411141	0.54976	1.59914	2.63997	2.57692	2.00716	1.26005	3	2
Il10	0.0917576	2.29696	4.98054	17.7275	38.9729	36.1128	13.4164	6.95626	4.64575	5.76233	7.59395	8.73043	8.62047	7.19195	6.24434	3	2
Micall2	3.67025	3.3342	1.89594	7.94512	12.3159	11.0001	10.9532	9.73659	-0.138538	-0.952965	1.11419	1.74657	1.58357	1.5774	1.40754	3	2
Pim2	3.14497	6.52487	9.64246	17.2429	22.6826	19.5874	13.9036	12.2128	1.0529	1.61636	2.45488	2.85047	2.63881	2.14434	1.95728	3	2
Sept11	13.7786	11.5953	16.2757	35.9737	51.0177	40.8196	18.7423	13.6007	-0.248889	0.24029	1.38451	1.88857	1.56683	0.443869	-0.0187484	3	2
Sh3bp5	7.23628	5.01065	5.5014	13.9491	21.7244	17.5835	12.0287	11.009	-0.53025	-0.395449	0.946852	1.586	1.2809	0.733161	0.605363	3	2
Inpp5d	26.7108	23.0802	21.0292	8.25585	7.09395	13.1404	24.4138	24.219	-0.210767	-0.345029	-1.69393	-1.91276	-1.02341	-0.129726	-0.141284	3	2
Glul	172.173	115.33	124.492	96.1656	84.2718	98.8953	136.081	156.634	-0.578091	-0.467806	-0.840266	-1.03074	-0.799885	-0.339393	-0.136462	3	2
Parp1	11.2546	12.3628	10.6486	6.77017	4.77771	5.54655	9.02534	10.7443	0.135491	-0.079851	-0.733251	-1.23612	-1.02085	-0.318462	-0.0669433	3	2
Batf3	11.9546	12.6111	9.22176	4.96139	4.78504	5.12744	5.69329	7.60591	0.0771283	-0.374452	-1.26875	-1.32096	-1.22126	-1.07023	-0.652373	3	2
Rgs2	34.5765	64.5643	18.5079	4.72683	3.3382	4.99369	8.06753	9.5112	0.900945	-0.901651	-2.87085	-3.37265	-2.79161	-2.09959	-1.86209	3	2
Mical1	13.662	14.1122	10.1583	4.90061	3.10314	3.63624	5.61136	7.5116	0.0467742	-0.42751	-1.47914	-2.13837	-1.90965	-1.28375	-0.862977	3	2
Arhgap9	46.0405	32.1193	26.2864	20.1591	17.3931	19.8493	26.9082	36.1396	-0.519463	-0.808587	-1.19147	-1.40439	-1.21382	-0.774858	-0.349323	3	2
Btbd2	11.1967	10.7829	10.9906	5.8116	5.31692	6.15966	8.55117	10.1371	-0.0543284	-0.0268034	-0.946066	-1.07441	-0.862151	-0.38888	-0.143429	3	2
Appl2	32.8483	47.1086	49.7461	27.3104	15.1492	17.5444	22.4683	24.9919	0.520172	0.598765	-0.266368	-1.11658	-0.904808	-0.547928	-0.394358	3	2
Rassf3	38.6399	62.7241	56.9756	17.5702	9.73229	9.94218	19.9439	25.8844	0.698929	0.560253	-1.13696	-1.98924	-1.95846	-0.954144	-0.578008	3	2
Acap1	30.2268	35.0771	34.1647	19.5297	14.0015	14.2847	15.0897	19.0779	0.214701	0.176678	-0.630158	-1.11025	-1.08136	-1.00226	-0.663926	3	2
Cd300lf	61.91	40.7004	41.0979	21.5993	13.5973	16.1673	28.1748	32.9514	-0.605129	-0.591108	-1.51919	-2.18685	-1.93709	-1.13577	-0.909833	3	2
Evl	58.1714	49.2567	32.9122	19.8563	14.5071	20.4674	29.9367	31.495	-0.23999	-0.821688	-1.55071	-2.00355	-1.50698	-0.958395	-0.885187	3	2
Arrdc3	32.3081	45.1678	10.2944	2.07063	2.01879	3.33357	10.9721	15.2688	0.483399	-1.65004	-3.96375	-4.00033	-3.27676	-1.55806	-1.08131	3	2
Gmnn	11.7213	13.7861	11.8826	4.934	3.8695	3.92042	6.16689	8.79653	0.234082	0.019718	-1.2483	-1.59891	-1.58005	-0.926518	-0.414126	3	2
Pxk	9.11068	12.8606	14.462	6.78035	4.27493	6.48893	10.8906	12.5366	0.497327	0.666636	-0.426199	-1.09166	-0.489578	0.257453	0.460515	3	2
Plau	58.3712	49.0131	51.2111	25.3168	14.1726	14.2789	18.6531	16.3308	-0.252089	-0.1888	-1.20516	-2.04215	-2.03137	-1.64584	-1.83766	3	2
Mtss1	37.781	60.8861	62.2497	16.2988	12.0426	16.0835	25.0728	26.3988	0.688452	0.720406	-1.2129	-1.64951	-1.23208	-0.591538	-0.517189	3	2
Cd200r1	109.333	72.9043	53.8067	30.7513	25.0695	31.0944	46.5854	47.0343	-0.584653	-1.02287	-1.83001	-2.12472	-1.814	-1.23078	-1.21694	3	2
Dynlt1b	43.9939	35.2239	27.2974	19.92	16.3483	22.3541	36.6263	44.9313	-0.320749	-0.68854	-1.14309	-1.42816	-0.976764	-0.264424	0.0304173	3	2
Ccnd3	33.0904	33.7898	26.1532	14.6994	12.2427	15.7873	31.9287	41.0208	0.0301751	-0.339425	-1.17066	-1.43449	-1.06765	-0.0515589	0.309943	3	2
Mta3	12.8528	19.4451	17.383	7.34649	5.35533	6.48601	8.5549	10.9366	0.597324	0.435594	-0.806956	-1.26304	-0.98668	-0.58726	-0.232918	3	2
Klc4	12.5468	14.5541	11.8657	7.9147	4.30089	4.99311	8.58026	11.8206	0.214106	-0.0805222	-0.664713	-1.54461	-1.32931	-0.548226	-0.0860162	3	2
Rab31	32.0366	28.6343	29.0676	16.769	16.0009	22.0235	34.7191	32.7895	-0.161977	-0.140309	-0.933924	-1.00157	-0.540677	0.116009	0.0335129	3	2
Svil	12.1281	10.0416	12.3529	6.78224	5.58103	6.81162	11.8128	12.976	-0.272364	0.0264962	-0.83852	-1.11975	-0.832284	-0.0380026	0.0974922	3	2
Tmem173	16.0082	12.911	9.20801	6.94337	5.32937	5.88432	8.54405	11.4317	-0.31021	-0.79785	-1.2051	-1.58677	-1.44386	-0.905819	-0.485771	3	2
Fads1	25.1018	19.1893	13.9221	10.0361	8.06523	9.20913	13.7457	16.9004	-0.387489	-0.850414	-1.32259	-1.638	-1.44665	-0.86881	-0.570733	3	2
Dock8	29.8205	30.1911	34.2566	16.4761	5.26045	5.80082	17.9711	23.2858	0.0178189	0.200078	-0.85593	-2.50305	-2.36198	-0.730626	-0.356854	3	2
Scd2	61.2677	64.1208	58.5735	29.958	15.571	18.8816	54.5603	71.4419	0.0656657	-0.0648786	-1.03219	-1.97627	-1.69815	-0.167275	0.221644	3	2
Olfm1	31.0784	32.7732	24.9912	20.1424	13.5566	13.9885	19.8092	24.1219	0.0766043	-0.314492	-0.625677	-1.19692	-1.15167	-0.649742	-0.365569	3	2
Angptl2	18.1532	11.3171	10.6645	7.62913	6.68274	10.1622	17.0149	21.3126	-0.68172	-0.767408	-1.25063	-1.44171	-0.837011	-0.0934252	0.231483	3	2
Pdk1	26.073	22.4653	22.0141	13.7073	10.8506	14.2797	21.545	21.8683	-0.214858	-0.244129	-0.927612	-1.26478	-0.868591	-0.275203	-0.253716	3	2
Lmo2	27.3364	31.8276	30.4055	18.2053	11.7667	12.0369	12.8281	16.9023	0.219455	0.153509	-0.586465	-1.21611	-1.18336	-1.09152	-0.693604	3	2
Spint1	22.5881	17.7044	14.0078	10.1031	7.94425	9.09231	19.2335	23.3981	-0.351455	-0.689333	-1.16076	-1.50758	-1.31284	-0.231942	0.0508285	3	2
Acss2	19.1438	15.4781	13.0957	10.7068	9.20999	11.4506	21.7214	28.3267	-0.306649	-0.547784	-0.83835	-1.05561	-0.741454	0.18224	0.565285	3	2
Slc25a12	18.5817	13.4597	13.8393	10.3218	9.0491	10.4941	15.7566	17.0542	-0.465236	-0.425112	-0.848188	-1.03804	-0.824304	-0.237926	-0.123755	3	2
Ehd4	23.0435	20.657	16.4828	10.0703	8.45816	9.96356	14.6562	16.2028	-0.157729	-0.483399	-1.19425	-1.44594	-1.20963	-0.652849	-0.508117	3	2
Setd7	11.8463	12.3388	11.0694	3.91055	3.39585	4.2835	8.82001	11.7631	0.0587656	-0.0978595	-1.59899	-1.80259	-1.46757	-0.425584	-0.0101682	3	2
Dapp1	12.0663	9.3501	11.142	7.83361	5.01059	5.29954	7.4208	9.46282	-0.36793	-0.114975	-0.623234	-1.26793	-1.18704	-0.701337	-0.350641	3	2
Coro2a	16.8806	20.8185	18.7715	10.1219	7.52526	7.98499	9.54109	10.3788	0.3025	0.153178	-0.737886	-1.16555	-1.08	-0.82314	-0.701727	3	2
Alad	8.62186	5.06449	4.37792	4.50412	3.92795	5.91976	10.1405	10.9149	-0.767582	-0.977754	-0.936754	-1.13422	-0.54246	0.234058	0.340228	3	2
Urod	24.6927	17.9658	16.1906	14.5673	10.8573	11.8721	18.2843	21.2643	-0.458831	-0.608928	-0.761351	-1.18542	-1.05651	-0.433479	-0.215651	3	2
Fblim1	29.3265	27.8715	24.4775	12.5935	9.99133	13.0871	21.0541	22.6278	-0.0734143	-0.260749	-1.21953	-1.55346	-1.16406	-0.478104	-0.374109	3	2
Pik3cd	21.5074	30.8236	26.6527	8.51961	7.51912	8.81826	17.976	23.802	0.519202	0.309449	-1.33597	-1.5162	-1.28627	-0.258761	0.14625	3	2
Pop5	12.5594	10.141	7.98158	7.86739	5.43197	6.02174	10.1422	12.8795	-0.308568	-0.654021	-0.674811	-1.20922	-1.06052	-0.308397	0.036309	3	2
Taok3	16.6655	19.5237	21.0641	7.9531	7.34244	9.32951	15.6162	16.0113	0.228362	0.337922	-1.06728	-1.18253	-0.836991	-0.0938212	-0.0577742	3	2
Rfc2	17.3164	20.0038	17.5823	12.632	7.28759	7.98043	11.3811	15.0898	0.208135	0.0219848	-0.455056	-1.24863	-1.1176	-0.605499	-0.198565	3	2
Gtf3a	18.7627	13.176	10.8124	11.2111	8.6842	11.2227	15.6786	18.0245	-0.509955	-0.795181	-0.74294	-1.1114	-0.741448	-0.259071	-0.0579082	3	2
Tec	28.567	47.7139	42.0271	9.66315	8.10314	10.9384	16.1593	15.7224	0.74006	0.55697	-1.56378	-1.8178	-1.38495	-0.821985	-0.861528	3	2
Erp29	137.448	100.913	82.8651	68.4576	65.8403	66.8971	102.66	128.691	-0.445774	-0.730049	-1.0056	-1.06184	-1.03887	-0.421012	-0.0949748	3	2
Gtf2i	13.694	13.6537	12.8781	6.96448	4.41182	4.52164	10.1006	11.613	-0.00425196	-0.0886242	-0.975456	-1.6341	-1.59863	-0.439103	-0.237803	3	2
Atg7	19.5524	19.2505	20.0076	13.2779	8.99842	10.4254	14.538	15.8517	-0.0224498	0.0332024	-0.558319	-1.1196	-0.907243	-0.427517	-0.302708	3	2
Dguok	15.9116	17.7337	16.9986	9.88671	6.3432	8.40388	11.9966	13.7876	0.156415	0.095337	-0.686516	-1.3268	-0.920951	-0.407453	-0.206708	3	2
Pnkp	19.5699	21.221	19.7727	9.5544	9.33283	10.1026	14.7779	20.1252	0.116856	0.0148735	-1.0344	-1.06825	-0.95391	-0.405195	0.0403667	3	2
Echs1	30.8156	30.6663	25.2985	17.3595	11.2536	15.5324	32.2771	39.5417	-0.00700677	-0.284609	-0.827935	-1.45327	-0.98838	0.0668501	0.359714	3	2
Pddc1	19.0064	22.8278	19.0436	9.15241	7.35839	11.037	14.7574	16.444	0.264307	0.00282093	-1.05426	-1.36902	-0.784137	-0.365047	-0.208924	3	2
Nrp1	53.1249	30.187	28.0313	28.3672	24.8743	28.9531	36.349	35.6611	-0.815461	-0.92235	-0.905164	-1.09473	-0.87567	-0.547473	-0.575037	3	2
Rasa3	21.1142	17.4493	15.6347	5.67506	4.93208	6.93058	11.9019	15.1348	-0.275044	-0.433462	-1.89551	-2.09795	-1.60717	-0.827022	-0.480344	3	2
Pik3r2	10.063	6.80828	5.10468	3.53951	3.33401	4.38103	7.71007	10.1775	-0.563698	-0.979168	-1.50744	-1.59373	-1.19972	-0.384245	0.0163228	3	2
Rnf166	35.0151	29.3504	25.4959	17.5222	16.1754	18.2066	22.547	25.6177	-0.254597	-0.457712	-0.998793	-1.11418	-0.943516	-0.635042	-0.450836	3	2
Pstpip1	52.9806	62.5708	45.283	16.519	14.7142	19.3872	35.3158	44.2646	0.240025	-0.226495	-1.68134	-1.84826	-1.45036	-0.58515	-0.259311	3	2
Ccr2	25.8756	26.335	19.8373	8.73589	4.63002	6.39923	11.1728	11.3933	0.0253891	-0.383377	-1.56657	-2.4825	-2.01562	-1.2116	-1.18341	3	2
Dcps	9.20368	5.63287	4.88561	4.37111	4.00164	5.0738	10.4869	10.6566	-0.708341	-0.913672	-1.07421	-1.20162	-0.859144	0.188306	0.211464	3	2
Hmbs	13.2816	9.96978	8.20371	7.24877	5.83303	8.31297	12.1144	14.269	-0.413795	-0.695081	-0.873621	-1.18711	-0.675993	-0.132706	0.103455	3	2
Tgfbr2	17.526	17.8951	19.8001	10.9495	6.72577	6.8361	11.5545	14.465	0.0300678	0.176011	-0.678632	-1.38173	-1.35825	-0.601042	-0.27693	3	2
Abcd1	20.0727	14.258	11.9918	7.3825	6.73848	8.17455	16.9292	21.3378	-0.493463	-0.743186	-1.44305	-1.57474	-1.29602	-0.245721	0.0881767	3	2
Tsc22d3	25.3901	48.4584	27.9259	11.6958	4.96074	6.05708	9.1132	11.8526	0.932481	0.137338	-1.11828	-2.35564	-2.06757	-1.47824	-1.09906	3	2
Sept9	71.5224	69.8459	54.5191	39.7242	30.9739	34.0008	58.0494	65.456	-0.0342197	-0.391633	-0.848377	-1.20734	-1.07283	-0.301114	-0.12787	3	2
Treml1	22.8365	10.8164	8.16565	5.5949	5.34041	6.80212	10.9593	13.7104	-1.07812	-1.4837	-2.02916	-2.09632	-1.74729	-1.05919	-0.736071	3	2
Dnmt3l	9.87378	4.35274	5.30004	15.2529	26.9114	29.5587	20.6334	13.8141	-1.18168	-0.897599	0.627409	1.44654	1.58191	1.06331	0.484467	4	2
Slc1a2	0.21401	0.0350174	0.192919	2.86226	12.6234	13.328	11.9518	6.90078	-2.61153	-0.149683	3.7414	5.88228	5.96064	5.80341	5.01101	4	2
Slco3a1	3.40613	1.70204	1.50923	8.53437	55.1831	62.1601	39.2312	21.8999	-1.00087	-1.17432	1.32515	4.01802	4.18978	3.5258	2.68472	4	2
Dst	4.04086	3.34385	4.18177	4.7905	10.7229	11.6505	9.82224	7.99729	-0.273152	0.0494513	0.245514	1.40796	1.52766	1.28139	0.984849	4	2
Psmd11	38.6557	30.2374	37.0097	50.9621	69.0751	81.5075	65.2394	55.5772	-0.354347	-0.0627777	0.398744	0.837485	1.07625	0.755062	0.523812	4	2
Rnd2	5.03436	3.60793	6.11828	9.42447	12.2266	12.4529	7.42803	3.85571	-0.480637	0.281318	0.904603	1.28014	1.3066	0.561171	-0.384812	4	2
Nampt	76.9961	62.8148	94.6409	125.397	161.699	165.051	121.912	102.473	-0.293681	0.297678	0.703646	1.07045	1.10005	0.662983	0.412387	4	2
Irf9	12.6195	8.10503	9.00078	12.9395	22.1668	25.5734	20.0688	19.7277	-0.638765	-0.487533	0.0361271	0.812746	1.01899	0.6693	0.644568	4	2
Rai14	6.35328	7.65504	7.08175	10.604	14.0269	14.7113	13.4168	12.0335	0.268908	0.156604	0.739035	1.14262	1.21135	1.07847	0.921483	4	2
Parp14	7.59678	4.75404	4.30584	9.16293	17.3459	17.7222	12.4822	12.4053	-0.676234	-0.819093	0.270421	1.19113	1.2221	0.716412	0.707497	4	2
Slc3a2	193.731	164.849	216.294	356.354	445.362	464.771	409.552	318.956	-0.23291	0.158939	0.879256	1.20092	1.26247	1.07999	0.719303	4	2
Traf2	7.27058	6.04125	9.88836	14.5869	14.6382	14.6488	12.0822	11.5345	-0.267223	0.443661	1.00453	1.0096	1.01064	0.732741	0.665813	4	2
AI314180	24.4563	26.5454	30.5828	27.1263	43.828	54.0003	44.1096	35.8847	0.118256	0.322514	0.149486	0.841647	1.14276	0.850887	0.553163	4	2
Isg15	5.10391	5.21904	5.45156	9.44846	17.2838	24.9583	18.2708	17.5987	0.0321816	0.0950662	0.888476	1.75975	2.28984	1.83987	1.78579	4	2
Dck	7.37132	8.76149	8.80161	7.9978	11.6744	16.7056	10.9461	9.9856	0.249253	0.255844	0.11768	0.663354	1.18034	0.570422	0.437926	4	2
Cxcl5	6.96364	27.4333	58.5226	111.731	137.939	151.737	106.395	129.799	1.97801	3.07108	4.00404	4.30804	4.44559	3.93344	4.22029	4	2
Cav1	67.7178	35.5324	82.3712	186.248	277.141	300.742	300.373	238.554	-0.9304	0.282605	1.45962	2.03301	2.15092	2.14915	1.81671	4	2
Asns	8.20327	11.0624	12.3782	22.0152	26.0682	26.7828	12.3768	7.89653	0.431393	0.593531	1.42423	1.66802	1.70704	0.593367	-0.0549803	4	2
Hmox1	1191.58	1251.3	1948.6	3252.29	3594.87	3673.45	2123.79	1785.24	0.0705519	0.709562	1.44858	1.59306	1.62426	0.833765	0.583242	4	2
Mmp13	88.0271	79.3887	100.732	247.095	253.166	256.044	178.512	101.076	-0.149014	0.194502	1.48905	1.52406	1.54037	1.02	0.199421	4	2
Psmd10	18.0389	16.2314	21.1888	32.7432	37.9836	38.0499	33.3966	30.8038	-0.152324	0.232191	0.860084	1.07427	1.07678	0.88859	0.771997	4	2
Car4	0.865525	4.37234	11.0896	13.0653	13.7944	13.8948	12.138	9.62538	2.33676	3.67949	3.91602	3.99436	4.00483	3.80981	3.4752	4	2
Tbc1d8	16.1333	30.1609	29.2871	13.8204	8.6897	7.89675	12.1764	17.0284	0.902638	0.860224	-0.223242	-0.892663	-1.03071	-0.405954	0.0779013	4	2
Ankrd44	10.0348	12.4493	15.8569	15.0647	6.19072	4.00154	5.85293	7.04225	0.311053	0.660099	0.58616	-0.696833	-1.32638	-0.777781	-0.510904	4	2
Ifngr1	85.0554	116.538	120.035	79.2359	35.8494	32.0497	41.2727	50.5757	0.454326	0.49698	-0.102249	-1.24645	-1.40809	-1.04322	-0.749958	4	2
Ddit4	55.1029	92.8331	52.9338	43.2644	41.8683	24.7343	48.4707	80.353	0.752511	-0.057939	-0.348948	-0.39627	-1.15562	-0.185015	0.544224	4	2
Mknk2	58.362	110.026	114.753	56.7563	23.4468	21.8447	38.1513	50.1219	0.914743	0.975431	-0.0402488	-1.31564	-1.41775	-0.613297	-0.219588	4	2
Dgka	8.28981	13.7516	13.2832	8.85723	4.36514	3.87529	5.04953	6.79925	0.730189	0.680192	0.0955165	-0.925311	-1.09703	-0.71519	-0.285963	4	2
Guk1	36.449	39.3611	34.3069	28.5179	19.895	16.6701	21.1222	25.8974	0.110891	-0.0873805	-0.354011	-0.873473	-1.12862	-0.787119	-0.493072	4	2
Cd300ld	68.1696	45.1098	32.9181	32.4219	28.1113	26.5691	34.1415	34.5606	-0.595688	-1.05025	-1.07216	-1.27798	-1.35938	-0.997602	-0.98	4	2
Rin3	24.5201	34.7671	24.5301	21.1808	17.2003	11.7075	12.0705	15.4485	0.503758	0.000588252	-0.211208	-0.511531	-1.06653	-1.02248	-0.666498	4	2
Pygl	84.8524	98.8646	94.4586	61.6029	35.0675	29.3145	45.6427	70.6393	0.220499	0.154727	-0.461957	-1.27482	-1.53334	-0.894571	-0.264484	4	2
Nedd9	15.1079	18.3877	24.6666	15.9216	7.30419	5.91694	7.58204	8.87254	0.283438	0.707256	0.0756822	-1.04851	-1.35238	-0.994645	-0.767884	4	2
Auh	13.7956	26.0934	24.7283	14.9347	7.16662	5.78034	10.9065	14.0754	0.919477	0.841955	0.11446	-0.944843	-1.25498	-0.33902	0.0289677	4	2
Ltb4r1	21.908	35.4705	30.2129	22.4084	10.6752	8.58045	20.2529	39.3831	0.695162	0.463707	0.0325819	-1.03719	-1.35233	-0.113329	0.846119	4	2
Rcbtb2	61.9863	87.0612	84.5406	50.8995	22.9855	16.7324	21.0921	27.1165	0.490081	0.447695	-0.284298	-1.43123	-1.8893	-1.55525	-1.19278	4	2
Gng2	16.2078	15.7929	14.81	10.0418	6.43532	6.06195	7.01969	9.08172	-0.0374122	-0.130117	-0.69067	-1.3326	-1.41883	-1.20721	-0.835651	4	2
Pdgfb	24.0899	17.8983	13.0673	19.4676	11.5651	10.2244	14.2901	14.3093	-0.428606	-0.882467	-0.307353	-1.05865	-1.23641	-0.753412	-0.751475	4	2
Rarg	10.5482	14.2859	11.5577	8.66431	6.36034	4.36042	7.29077	8.47631	0.437595	0.131857	-0.28384	-0.729821	-1.27446	-0.532854	-0.315489	4	2
Calcoco1	11.1365	13.1566	12.9067	9.17314	5.22451	5.07998	6.73733	8.87713	0.240491	0.212824	-0.279808	-1.09193	-1.1324	-0.725047	-0.327131	4	2
Nfe2	10.5214	10.2495	5.69609	4.95817	3.66289	3.5357	4.08568	7.21605	-0.0377732	-0.885283	-1.08545	-1.52227	-1.57326	-1.36468	-0.544045	4	2
Itgb5	45.2997	46.7145	40.1996	29.8238	17.2757	13.6461	17.6139	23.1521	0.0443689	-0.17232	-0.603037	-1.39076	-1.73101	-1.36279	-0.968358	4	2
Acaa2	28.0745	21.9567	20.9757	16.5332	10.905	10.3882	15.3472	20.5397	-0.354599	-0.420541	-0.763894	-1.36427	-1.43431	-0.871285	-0.450845	4	2
Mbp	16.07	17.9805	14.394	6.91784	5.81884	5.45418	11.5847	13.8983	0.162063	-0.158902	-1.21598	-1.46557	-1.55894	-0.472149	-0.209462	4	2
Add3	9.10044	10.0341	11.3286	8.76756	5.04328	4.18406	4.8681	6.01434	0.140903	0.315961	-0.0537609	-0.851574	-1.12103	-0.902577	-0.59753	4	2
Pdcd4	13.7992	21.3803	20.9621	10.3755	6.6153	5.7554	7.96473	10.2376	0.631697	0.603199	-0.411404	-1.06071	-1.2616	-0.792887	-0.430707	4	2
Grk5	9.92149	11.351	12.9016	7.33148	4.27296	3.72976	5.34179	7.44789	0.194191	0.378921	-0.436452	-1.21532	-1.41147	-0.893234	-0.413725	4	2
Bmyc	10.4089	10.8908	11.2497	4.22002	3.9701	3.54469	5.04232	7.46302	0.0652923	0.112069	-1.3025	-1.39057	-1.55409	-1.04566	-0.479986	4	2
Pkig	24.7827	28.5039	23.4139	18.6286	12.3732	11.7283	15.8768	22.0188	0.201826	-0.0819681	-0.411814	-1.00211	-1.07934	-0.642413	-0.170598	4	2
Plcb2	11.3685	12.5278	9.76412	5.99525	4.00418	3.83106	5.70994	8.06522	0.140091	-0.21948	-0.92315	-1.50546	-1.56923	-0.993494	-0.495256	4	2
Cd93	11.6466	12.2844	12.1304	6.8122	5.52616	4.70066	4.9657	5.27936	0.0769185	0.0587183	-0.773716	-1.07556	-1.30897	-1.22984	-1.14147	4	2
Samhd1	77.193	95.0022	88.3651	67.2514	34.8879	26.9261	37.5083	53.5826	0.299491	0.195007	-0.198906	-1.14574	-1.51946	-1.04126	-0.526705	4	2
Mafb	34.5777	55.5636	49.4482	12.4151	12.2433	10.7999	18.0422	20.1986	0.684298	0.516076	-1.47775	-1.49785	-1.67882	-0.938467	-0.775587	4	2
Neurl2	11.247	15.4228	14.573	7.76783	5.33379	5.18011	6.52228	9.12652	0.455524	0.373758	-0.533957	-1.07631	-1.11849	-0.786092	-0.301403	4	2
Sirpb1a	43.826	25.6936	28.4134	22.2195	15.4194	13.9482	26.9947	33.4886	-0.770378	-0.625216	-0.979961	-1.50704	-1.65171	-0.699111	-0.388117	4	2
Polr3gl	11.5321	11.8419	10.0275	7.04146	4.99439	4.27048	7.54005	9.44922	0.0382453	-0.201693	-0.711709	-1.20727	-1.43319	-0.613009	-0.287388	4	2
Hadh	15.2418	21.8719	19.4213	13.8078	9.13485	7.10421	8.22922	10.9815	0.521045	0.349606	-0.14255	-0.73858	-1.10129	-0.889206	-0.472958	4	2
Fuca1	70.3744	49.5118	46.9646	42.7363	38.1053	32.7887	44.2634	57.4467	-0.507278	-0.583477	-0.719589	-0.885059	-1.10185	-0.668936	-0.292827	4	2
Atp6v0d2	71.2168	68.2074	70.2667	52.1414	32.1423	23.2311	26.0442	29.371	-0.0622893	-0.0193765	-0.449788	-1.14774	-1.61616	-1.45126	-1.27783	4	2
Wfs1	22.941	18.5173	12.5218	13.2152	11.6676	11.0159	12.9885	14.3007	-0.309055	-0.873486	-0.79573	-0.97542	-1.05834	-0.820693	-0.681843	4	2
Rell1	6.24051	10.1372	10.1022	7.326	3.73339	2.95124	3.82186	4.12772	0.699923	0.694934	0.231362	-0.741178	-1.08034	-0.707389	-0.596319	4	2
Hscb	11.7343	21.1338	22.7023	15.0549	7.04767	5.69327	7.78331	9.33204	0.84882	0.952107	0.359501	-0.735514	-1.0434	-0.592276	-0.330467	4	2
Lat2	49.5839	47.3054	37.996	29.2667	22.3291	21.6453	24.3679	25.3271	-0.0678669	-0.384024	-0.760612	-1.15095	-1.19582	-1.02489	-0.96919	4	2
Pdgfa	22.8304	15.993	9.81622	11.004	8.30861	7.1333	9.17679	7.86744	-0.513516	-1.21772	-1.05293	-1.45828	-1.67831	-1.31489	-1.53699	4	2
Cdkn1b	27.3314	51.0499	39.0268	19.1577	14.03	12.5885	16.9952	22.2791	0.901349	0.513906	-0.512635	-0.962044	-1.11845	-0.685432	-0.294868	4	2
Mgst1	278.802	178.913	183.722	149.785	124.916	119.644	141.325	185.529	-0.639983	-0.601717	-0.896348	-1.15828	-1.22049	-0.980224	-0.587596	4	2
Abtb1	24.818	38.6738	28.1406	15.8555	11.5147	11.2781	11.5553	14.1687	0.63997	0.181266	-0.646403	-1.10791	-1.13786	-1.10283	-0.808679	4	2
Map4k1	10.7082	10.471	8.16064	6.35397	3.96344	3.75377	5.67799	7.4454	-0.0323168	-0.391962	-0.752986	-1.43389	-1.5123	-0.915264	-0.524295	4	2
Ucp2	312.922	223.66	169.26	150.522	119.187	110.097	164.028	239.346	-0.484496	-0.886562	-1.05583	-1.39258	-1.50703	-0.931861	-0.386705	4	2
Pnpla2	39.3913	44.8585	44.7399	27.094	19.3772	16.5401	18.6246	23.2498	0.187504	0.183685	-0.539904	-1.02352	-1.25191	-1.08067	-0.760659	4	2
Tspan4	21.4892	17.8575	15.4898	12.4781	9.85333	9.76831	11.2656	12.9017	-0.267082	-0.472293	-0.784213	-1.12493	-1.13743	-0.931688	-0.736051	4	2
Apoc2	31.8541	26.7068	24.8438	21.5094	19.9542	14.5275	16.0279	15.0576	-0.254272	-0.358593	-0.566512	-0.674787	-1.13269	-0.990894	-1.08099	4	2
Uvrag	10.0973	15.9291	19.407	9.03069	3.61079	3.36541	6.40265	8.27695	0.657695	0.942608	-0.161061	-1.48358	-1.58512	-0.657229	-0.286798	4	2
Casp3	19.9727	27.6062	29.6835	18.8632	10.4347	9.05209	11.3977	13.9314	0.466963	0.571632	-0.0824549	-0.93664	-1.14171	-0.809287	-0.519689	4	2
Pla2g15	19.4413	16.4106	15.0553	10.4253	9.80142	9.51796	13.5852	16.4175	-0.244497	-0.368853	-0.899036	-0.988062	-1.0304	-0.517089	-0.24389	4	2
Gse1	15.1888	23.1509	15.1331	7.45155	6.96919	5.88367	10.2312	13.3248	0.60806	-0.00530034	-1.0274	-1.12395	-1.36822	-0.570033	-0.188894	4	2
Ssbp4	19.0579	20.3237	20.3723	16.83	12.649	8.74837	9.13106	13.0368	0.0927739	0.0962197	-0.179354	-0.591366	-1.1233	-1.06153	-0.547799	4	2
Haus8	16.2781	11.7538	10.1722	8.12057	5.82127	5.54885	7.68964	10.2749	-0.469805	-0.678301	-1.00328	-1.48353	-1.55267	-1.08194	-0.663808	4	2
Cd97	18.8584	13.1951	14.8227	11.5802	9.19913	6.49546	12.1448	16.5095	-0.515205	-0.347399	-0.703547	-1.03564	-1.5377	-0.634869	-0.191911	4	2
Myo1e	26.1221	19.4624	20.1388	22.6401	13.2375	11.4787	20.2333	19.8927	-0.424581	-0.375293	-0.206391	-0.98064	-1.18631	-0.368539	-0.393032	4	2
Nt5e	22.8846	19.8369	19.6356	12.3518	5.92891	4.55062	12.4537	16.6007	-0.20619	-0.220905	-0.889656	-1.94854	-2.33024	-0.877803	-0.463133	4	2
Gpx1	664.738	523.688	448.586	471.524	340.176	307.436	363.984	483.871	-0.344078	-0.567401	-0.495455	-0.966504	-1.1125	-0.868911	-0.458163	4	2
Rab3d	13.5922	13.7131	13.0238	8.326	5.55979	5.36555	8.6611	13.9657	0.0127758	-0.0616285	-0.707084	-1.28968	-1.34098	-0.650157	0.0391089	4	2
Alox5	16.8652	14.7989	13.4487	8.24428	3.75105	2.81978	5.40297	8.71442	-0.188559	-0.326583	-1.03258	-2.16868	-2.58039	-1.64222	-0.952573	4	2
Lbh	8.66493	11.8955	10.4772	3.82133	2.99356	2.95332	5.0509	6.66733	0.457156	0.273993	-1.18111	-1.53333	-1.55285	-0.778648	-0.378079	4	2
Matk	19.9484	14.9306	11.261	8.43867	5.52836	3.96227	4.51516	5.34054	-0.418001	-0.824938	-1.24119	-1.85135	-2.33187	-2.14342	-1.90122	4	2
Pde3b	9.98917	16.0378	18.5852	9.83692	2.58241	1.83326	3.81836	6.11249	0.68304	0.895717	-0.0221581	-1.95165	-2.44595	-1.38741	-0.708605	4	2
Smarca2	8.72899	12.9579	14.0247	6.53081	3.3348	1.99781	3.8715	4.92757	0.569945	0.684083	-0.418553	-1.38821	-2.1274	-1.17292	-0.824938	4	2
Tpcn1	8.32979	13.3909	11.5873	5.25456	2.26712	1.57837	2.81933	5.21369	0.684901	0.476192	-0.66471	-1.87742	-2.39984	-1.56293	-0.675975	4	2
Il1r1	5.61388	4.33291	6.61001	8.67053	7.51159	8.82468	14.0686	12.9914	-0.373662	0.235654	0.627122	0.42012	0.652546	1.32541	1.21049	6	3
Pla2g4a	11.5014	8.8108	11.2646	12.1629	13.7476	21.6512	24.2692	18.7346	-0.384465	-0.0300134	0.0806778	0.25737	0.912638	1.07732	0.703896	6	3
Cpd	19.2989	30.294	37.528	50.5556	58.9975	59.899	64.0067	56.1818	0.650513	0.959449	1.38935	1.61214	1.63401	1.7297	1.54158	6	3
Glrx	73.3008	47.7465	67.5533	107.177	140.336	154.543	198.204	178.342	-0.618434	-0.117803	0.548094	0.936984	1.07611	1.43509	1.28275	6	3
Mmp14	135.102	84.8652	112.358	185.617	272.033	269.279	282.939	272.789	-0.670804	-0.265946	0.45828	1.00973	0.995053	1.06644	1.01374	6	3
Fyb	21.8414	21.6028	23.328	27.725	45.6205	51.8725	67.2416	66.299	-0.015847	0.0949973	0.344122	1.06262	1.2479	1.62229	1.60192	6	3
Sla	6.24098	5.2857	11.9402	8.92914	9.66172	9.81309	13.9014	12.5858	-0.239678	0.935983	0.516749	0.630507	0.652935	1.15539	1.01195	6	3
H2-M2	12.8666	18.6089	30.2371	49.8149	72.6881	63.4212	77.7682	75.3781	0.532362	1.23269	1.95295	2.49809	2.30133	2.59555	2.55051	6	3
Gbp2	4.91507	3.97131	6.52968	18.7357	22.0614	25.7711	27.4551	24.9752	-0.307597	0.4098	1.93051	2.16624	2.39047	2.48179	2.34521	6	3
Pilrb2	13.3141	14.3408	23.4084	29.931	30.9042	29.0123	31.3637	30.1322	0.107171	0.814071	1.16869	1.21485	1.12371	1.23614	1.17835	6	3
Pilra	37.0978	36.5441	49.3195	76.7027	91.4623	86.5295	92.7892	88.7896	-0.0216951	0.410825	1.04794	1.30184	1.22186	1.32262	1.25906	6	3
Pilrb1	14.6137	14.9379	23.6765	40.512	48.7485	49.0417	53.6454	52.4423	0.0316558	0.696134	1.47103	1.73804	1.74669	1.87613	1.84341	6	3
Il20rb	3.61498	5.10472	3.36279	5.33099	10.5447	10.8289	11.2368	8.7325	0.497844	-0.104329	0.560416	1.54446	1.58283	1.63617	1.27241	6	3
Acpp	169.651	133.192	181.778	296.045	435.926	462.841	489.746	444.764	-0.349063	0.0996077	0.803247	1.36151	1.44795	1.52946	1.39047	6	3
Lox	0.886681	0.86498	1.77628	7.96714	11.4955	11.8733	16.6566	13.4202	-0.0357484	1.00237	3.16757	3.69651	3.74316	4.23153	3.91985	6	3
Ppap2a	2.75093	1.97771	1.93146	3.8224	11.4059	12.4746	14.3161	14.1508	-0.476089	-0.510228	0.474559	2.05179	2.181	2.37965	2.36289	6	3
Ptpn18	8.68667	15.4555	14.4948	12.3488	6.6915	4.48612	2.45652	3.09916	0.831245	0.73866	0.507496	-0.376474	-0.953335	-1.82219	-1.48693	6	3
Mgst3	17.1399	14.2628	12.0904	13.8771	7.58444	9.04073	7.50907	10.4763	-0.265101	-0.503497	-0.304653	-1.17624	-0.922848	-1.19065	-0.710229	6	3
H2afv	12.8463	16.5033	13.3935	13.1682	8.95518	7.43157	5.9732	8.11411	0.361402	0.0601801	0.0357053	-0.520559	-0.789614	-1.10478	-0.662848	6	3
Jup	10.588	13.7425	15.1892	12.1439	5.81515	2.82928	2.15843	3.59718	0.376214	0.520616	0.197802	-0.864542	-1.90392	-2.29438	-1.55749	6	3
Haao	11.2901	20.1258	16.5012	12.0276	6.73331	5.37451	5.07305	5.32164	0.833988	0.547513	0.0912905	-0.74567	-1.07085	-1.15413	-1.08512	6	3
Fam107b	18.9918	21.2746	32.2955	29.6899	12.8952	8.85466	8.37644	10.018	0.163755	0.765957	0.644596	-0.558542	-1.10087	-1.18097	-0.922782	6	3
Scand1	12.3856	12.534	15.0282	22.0521	20.0536	7.45185	4.61843	7.13497	0.0171831	0.279008	0.832252	0.695197	-0.732993	-1.42319	-0.795684	6	3
Fabp4	44.6096	56.5965	83.1788	75.6703	44.3455	29.3927	19.4938	19.9726	0.343359	0.898862	0.762373	-0.0085665	-0.601896	-1.19434	-1.15933	6	3
Pink1	20.3597	18.5775	15.6944	13.9414	10.7422	10.3903	9.52787	10.4454	-0.13216	-0.375466	-0.546341	-0.922427	-0.970479	-1.09549	-0.962849	6	3
Mxd4	7.20796	10.7452	11.8391	8.88322	6.05324	5.0347	3.58241	5.14156	0.576029	0.715897	0.301492	-0.251883	-0.517685	-1.00866	-0.487385	6	3
Lsr	32.4967	64.7252	59.967	45.3381	22.5436	15.2857	9.77553	12.239	0.994034	0.883876	0.480431	-0.527575	-1.08811	-1.73305	-1.40881	6	3
Fcgrt	11.0258	17.5544	15.9115	13.9667	8.23386	7.21181	4.82348	7.21826	0.670949	0.529187	0.341108	-0.421243	-0.61245	-1.19274	-0.61116	6	3
Il15	9.08742	17.1963	12.6332	6.331	3.05075	3.13225	2.91734	3.16325	0.920156	0.475277	-0.521437	-1.57471	-1.53667	-1.63922	-1.52246	6	3
Oas1a	10.0513	4.58086	3.99794	5.04617	10.9891	15.2974	20.3032	23.0124	-1.13369	-1.33005	-0.994121	0.128691	0.605904	1.01433	1.19503	8	3
Irf7	5.62853	3.83893	3.17909	2.43915	8.06238	12.3435	11.0015	12.7929	-0.552054	-0.824144	-1.20638	0.518448	1.13292	0.96687	1.18451	8	3
Zbp1	3.13694	2.0396	3.0027	1.21835	4.13003	6.91772	10.4294	11.7544	-0.621072	-0.0630976	-1.36443	0.396794	1.14094	1.73323	1.90577	8	3
Il1rl2	5.93469	5.07179	8.28313	7.38275	7.19547	8.50788	13.7683	15.1619	-0.226678	0.481003	0.314986	0.277916	0.519627	1.21411	1.35321	8	3
Chi3l1	43.4972	67.3528	111.36	137.1	154.291	130.112	160.934	161.676	0.630815	1.35624	1.65623	1.82666	1.58076	1.88747	1.89411	8	3
Nos2	20.071	37.587	35.7656	34.2232	42.0432	56.9841	94.1648	124.808	0.905121	0.83346	0.769862	1.06676	1.50545	2.23008	2.63653	8	3
Cxcl16	85.8701	71.9181	105.066	157.764	171.346	175.589	209.586	227.938	-0.255801	0.291068	0.87754	0.996685	1.03197	1.28731	1.40841	8	3
Tgfbi	100.122	117.285	94.5542	75.9474	66.2388	82.4077	288.01	428.143	0.228259	-0.0825456	-0.398687	-0.596011	-0.280908	1.52436	2.09633	8	3
Psme2	96.3279	74.6401	72.2027	119.603	153.631	185.13	190.944	194.448	-0.368003	-0.415901	0.312228	0.673444	0.942513	0.987124	1.01336	8	3
Ly6a	36.8547	19.707	19.4005	23.4244	28.4962	36.5229	49.6936	84.5227	-0.90314	-0.925755	-0.653837	-0.371079	-0.0130473	0.431211	1.19749	8	3
Slc39a4	25.4815	18.5207	20.1164	21.9895	27.6345	33.2366	44.8099	53.3582	-0.460312	-0.341078	-0.212635	0.11702	0.383323	0.814367	1.06626	8	3
Hcls1	142.959	90.7488	85.0691	106.159	172.998	231.207	319.531	351.161	-0.655651	-0.748894	-0.429375	0.275154	0.693584	1.16035	1.29653	8	3
Fpr2	98.3536	88.9978	160.401	252.495	294.738	311.735	384.029	452.921	-0.144208	0.705633	1.36021	1.58338	1.66427	1.96517	2.20321	8	3
Cfb	2.35672	3.13785	5.25341	10.2917	20.4652	20.5046	33.3101	39.8881	0.412996	1.15647	2.12663	3.11832	3.1211	3.82111	4.08111	8	3
H2-T22	8.63779	9.51404	8.04563	8.74958	10.8141	13.0777	15.8202	18.0861	0.139396	-0.102457	0.0185515	0.324179	0.598375	0.873034	1.06615	8	3
Ass1	344.061	270.356	240.263	284.323	359.538	428.464	570.095	699.833	-0.347804	-0.51805	-0.275134	0.0634799	0.31651	0.728538	1.02435	8	3
Ptpn1	63.4211	48.2556	59.5211	87.5135	136.672	151.878	155.825	162.293	-0.394267	-0.0915617	0.464543	1.10768	1.25988	1.29689	1.35557	8	3
Lcn2	81.0087	170.312	268.765	575.037	822.276	941.501	1362.65	1610.81	1.07203	1.7302	2.82751	3.34347	3.53881	4.07219	4.31357	8	3
Slpi	426.838	340.535	348.214	458.008	706.876	854.762	1027.94	1136.59	-0.325886	-0.293714	0.101684	0.727769	1.00183	1.268	1.41295	8	3
Clec4a1	26.367	15.87	19.5199	36.4792	49.9638	55.0381	66.5355	70.4862	-0.732431	-0.433788	0.468341	0.92215	1.0617	1.33539	1.41861	8	3
C1ra	10.9706	11.0179	10.0111	9.62907	12.3248	11.7414	19.4534	28.9144	0.00620684	-0.132042	-0.188174	0.167922	0.097962	0.82638	1.39815	8	3
Osbpl3	3.51785	4.03986	9.14011	9.51677	10.0863	9.97835	11.9073	12.8122	0.199611	1.37752	1.43578	1.51963	1.50411	1.75908	1.86475	8	3
Saa3	69.2877	173.058	658.438	2995.05	6820.18	6876.54	10230.2	10298.1	1.32058	3.24838	5.43384	6.62107	6.63294	7.20602	7.21556	8	3
Hp	105.152	102.023	85.9149	98.1746	231.49	345.073	794.049	952.442	-0.0435819	-0.291496	-0.0990546	1.13847	1.71443	2.91675	3.17915	8	3
Camp	10.0756	15.9703	20.2741	22.7192	18.1766	21.7614	21.6208	23.2375	0.664526	1.00877	1.17305	0.851217	1.11091	1.10155	1.20559	8	3
Cybb	223.671	234.586	351.458	376.266	444.299	420.221	475.711	475.784	0.0687387	0.651974	0.750375	0.990153	0.90977	1.08871	1.08893	8	3
Marco	6.83485	5.53015	6.89438	14.8835	39.5922	40.7489	66.0299	85.1833	-0.305591	0.0125111	1.12273	2.53423	2.57578	3.27214	3.63959	8	3
Siglece	1.83648	1.13648	1.65067	4.33202	7.93066	10.3316	18.5157	23.9116	-0.692371	-0.153891	1.2381	2.1105	2.49205	3.33373	3.7027	8	3
Cxcr2	10.1451	14.4016	12.1429	5.80569	4.76414	4.09738	3.81476	3.53193	0.505446	0.25933	-0.805244	-1.0905	-1.30801	-1.41112	-1.52225	8	3
Ctse	19.3541	21.0515	22.0034	17.1057	13.7355	12.2818	10.2229	8.21209	0.121284	0.185087	-0.178162	-0.49473	-0.656117	-0.920835	-1.23682	8	3
Mmp19	115.259	117.672	104.621	89.696	63.7202	56.656	37.4586	36.5644	0.0298917	-0.139707	-0.361764	-0.855057	-1.02458	-1.62151	-1.65637	8	3
Ccl6	592.308	451.444	456.342	431.447	384.541	291.186	239.792	181.118	-0.391801	-0.376232	-0.457164	-0.62321	-1.02441	-1.30456	-1.70942	8	3
Ckb	93.2675	89.9265	71.2266	84.1669	50.5325	38.5725	24.0997	20.8312	-0.0526281	-0.388958	-0.148121	-0.884163	-1.2738	-1.95236	-2.16263	8	3
Sepp1	50.6187	52.6021	57.6411	49.558	38.6524	31.9964	23.4961	20.906	0.0554499	0.187427	-0.0305525	-0.389112	-0.661761	-1.10725	-1.27575	8	3
Cd200r2	48.1471	30.2861	29.1981	23.9449	20.29	15.961	18.0121	13.7112	-0.668793	-0.721574	-1.00773	-1.24668	-1.5929	-1.41848	-1.81209	8	3
Macrod1	7.37705	10.5177	11.2238	10.5382	7.84785	5.25172	3.31654	3.02902	0.511703	0.605445	0.514513	0.0892535	-0.490254	-1.15337	-1.28419	8	3
Car2	16.8755	8.73161	11.247	16.6081	13.992	13.0274	9.84466	7.68849	-0.950611	-0.58539	-0.0230432	-0.270328	-0.373381	-0.777517	-1.13416	8	3
S100a9	764.813	955.549	955.788	743.284	577.642	506.177	395.205	335.005	0.321223	0.321584	-0.0411935	-0.404931	-0.595465	-0.952506	-1.19092	8	3
C1qb	84.1674	71.6007	61.699	71.2008	61.9884	46.7721	42.6698	33.1194	-0.233288	-0.448014	-0.241368	-0.441263	-0.847613	-0.980046	-1.34559	8	3
C1qc	34.1984	28.8784	25.0438	27.8911	22.6095	17.5123	16.1923	12.3394	-0.243938	-0.449475	-0.294124	-0.597	-0.96556	-1.07862	-1.47066	8	3
C1qa	14.5403	15.1798	10.8842	11.763	9.0307	6.77093	7.11373	4.62677	0.0620957	-0.417822	-0.305801	-0.687147	-1.10263	-1.03138	-1.65198	8	3
Rassf8	19.6227	29.4203	27.0658	16.1968	12.1082	13.2649	11.5536	9.17701	0.584288	0.463947	-0.276815	-0.696539	-0.56491	-0.764181	-1.09643	8	3
Lsp1	150.719	124.67	114.761	127.088	106.906	103.385	79.3805	73.277	-0.273747	-0.393229	-0.246033	-0.495518	-0.543834	-0.925005	-1.04043	8	3
Klk1b11	35.5049	46.45	48.1984	46.97	32.9276	28.167	21.216	13.6257	0.38766	0.440967	0.403721	-0.108721	-0.334012	-0.742865	-1.38169	8	3
Sell	12.705	11.1757	12.2783	8.873	7.22364	7.10142	8.90391	5.17747	-0.185031	-0.0492856	-0.517903	-0.814598	-0.839217	-0.512885	-1.29508	8	3
