# Supplementary material for: Linking Transcriptional Changes over Time in Stimulated Dendritic Cells to Identify Gene Networks Activated during the Innate Immune Response
Source: PLoS Comput Biol. 2013 Nov 7;9(11):e1003323. doi: 10.1371/journal.pcbi.1003323 (PMC3820512; doi:10.1371/journal.pcbi.1003323)
Supplement: Table S18 — Number of interactions obtained from different sources used as input network to the algorithm. (XLSX) [file pcbi.1003323.s026.xlsx]

## Sheet: Interaction count
Supporting Table S18: Number of interactions obtained from different sources used as input network to the algorithm.
Interaction type	Source	Count
Physical mouse PPIs	HitPredict/Innatedb	5116
Mouse orthologs of human PPIs	HitPredict	64311
Protein-DNA/ miRNA-RNA	TRANSFAC	1881
Pathway associations	KEGG	31910
Total		103218
Number of proteins/ complexes	12856
