# Supplementary material for: Linking Transcriptional Changes over Time in Stimulated Dendritic Cells to Identify Gene Networks Activated during the Innate Immune Response
Source: PLoS Comput Biol. 2013 Nov 7;9(11):e1003323. doi: 10.1371/journal.pcbi.1003323 (PMC3820512; doi:10.1371/journal.pcbi.1003323)
Supplement: Table S20 — Complete network used with edge scores and weights (includes complexes as separate nodes). (XLSX) [file pcbi.1003323.s028.xlsx]

## Sheet: Complete network
Supporting Table S20. Complete network used with edge scores and weights (includes complexes as separate nodes)
Gene1	Gene2	Interaction type	Source	Score	Weight
Arl6ip5	2010107G23Rik	binding/association	HTP	3.37	0.2
Caml	2010107G23Rik	binding/association	HTP	3.37	0.2
Ms4a10	2010107G23Rik	binding/association	HTP	3.37	0.2
Nipa2	2010107G23Rik	binding/association	HTP	3.37	0.2
Nphp3	2210010C04Rik	binding/association	HTP	2.575	0.1
Atoh1	Runx1t1	binding/association	HTP	3.37	0.2
Rps6ka1	Nf2	binding/association	HTP	3.37	0.2
Rps6kb1	Gramd1a	binding/association	HTP	2.575	0.1
Atp1a1	Enpep	binding/association	HTP	999	0.8
Atp1a1	Mep1b	binding/association	HTP	999	0.8
Atp1a1	Naaladl1	binding/association	HTP	999	0.8
Atp1a1	Anpep	binding/association	HTP	999	0.8
Rrn3	Taf1b	binding/association	HTP	2.575	0.1
Rrn3	Polr1b	binding/association	HTP	8.67775	0.3
Runx1t1	Id4	binding/association	HTP	3.37	0.2
Runx1t1	Neurod1	binding/association	HTP	3.37	0.2
Runx1t1	Neurog1	binding/association	HTP	3.37	0.2
Runx2	Tle1	binding/association	HTP	3.37	0.2
Runx2	Cbfb	binding/association	HTP	66.0352	0.6
Runx2	Hdac4	binding/association	HTP	8.67775	0.3
Runx2	Rb1	binding/association	HTP	3.37	0.2
Runx2	Rbl2	binding/association	HTP	3.37	0.2
Ruvbl2	Ruvbl1	binding/association	HTP	3.37	0.2
Rwdd1	Drg1	binding/association	HTP	2.575	0.1
Rwdd1	Drg2	binding/association	HTP	2.575	0.1
Rxra	Zfp423	binding/association	HTP	8.67775	0.3
Rxra	Nr1h3	binding/association	HTP	8.67775	0.3
Rxra	Nr1h4	binding/association	HTP	2.575	0.1
Rybp	Cbx2	binding/association	HTP	8.67775	0.3
Rybp	Ring1	binding/association	HTP	8.67775	0.3
Ryk	Cdc37	binding/association	HTP	999	0.8
S100a4	S100a4	binding/association	HTP	999	0.8
S100a8	S100a8	binding/association	HTP	999	0.8
S100a9	S100a8	binding/association	HTP	999	0.8
S100a9	S100a9	binding/association	HTP	999	0.8
Sall4	Ruvbl2	binding/association	HTP	3.37	0.2
Sall4	Sall2	binding/association	HTP	2.575	0.1
Sall4	Sall3	binding/association	HTP	8.67775	0.3
Sall4	Smarca4	binding/association	HTP	8.67775	0.3
Sall4	Smarcb1	binding/association	HTP	3.37	0.2
Sall4	Smarcc1	binding/association	HTP	8.67775	0.3
Sall4	Tfcp2	binding/association	HTP	2.575	0.1
Sall4	Wdr5	binding/association	HTP	2.575	0.1
Sall4	Zbtb2	binding/association	HTP	8.67775	0.3
Sall4	Zfp143	binding/association	HTP	8.67775	0.3
Sall4	Zfp219	binding/association	HTP	8.67775	0.3
Sall4	Chd4	binding/association	HTP	8.67775	0.3
Sall4	Dpf2	binding/association	HTP	2.575	0.1
Sall4	Ewsr1	binding/association	HTP	3.37	0.2
Sall4	Gatad2a	binding/association	HTP	3.37	0.2
Sall4	Gatad2b	binding/association	HTP	3.37	0.2
Sall4	Grhl2	binding/association	HTP	2.575	0.1
Sall4	Kif5a	binding/association	HTP	2.575	0.1
Sall4	Mbd3	binding/association	HTP	3.37	0.2
Sall4	Mta2	binding/association	HTP	8.67775	0.3
Sall4	Mta3	binding/association	HTP	8.67775	0.3
Sall4	Arid1a	binding/association	HTP	8.67775	0.3
Sall4	Rbbp4	binding/association	HTP	8.67775	0.3
Sall4	Rbbp7	binding/association	HTP	8.67775	0.3
Sap18	Hmga1-rs1	binding/association	HTP	999	0.8
Sap25	Sin3a	binding/association	HTP	999	0.8
Sap30	Sin3a	binding/association	HTP	8.67775	0.3
Sap30	Sin3b	binding/association	HTP	8.67775	0.3
Sap30	Hdac1	binding/association	HTP	8.67775	0.3
Sap30	Hdac2	binding/association	HTP	8.67775	0.3
Sap30	Rbbp4	binding/association	HTP	2.575	0.1
Scarb2	Gba	binding/association	HTP	999	0.8
Scarb2	Lamp2	binding/association	HTP	999	0.8
Scmh1	Scmh1	binding/association	HTP	66.0352	0.6
Scnn1a	Nedd4l	binding/association	HTP	2.575	0.1
Scrib	Cdc42	binding/association	HTP	999	0.8
Scrib	Prkcd	binding/association	HTP	999	0.8
Atp5b	Prdx1	binding/association	HTP	8.67775	0.3
Atp5b	Prdx2	binding/association	HTP	8.67775	0.3
Sdhc	Sdha	binding/association	HTP	8.67775	0.3
Sdhc	Sdhb	binding/association	HTP	8.67775	0.3
Sema4b	Gipc1	binding/association	HTP	999	0.8
Sema4b	Gipc2	binding/association	HTP	999	0.8
Sema4c	Gipc1	binding/association	HTP	999	0.8
Sema4c	Gipc2	binding/association	HTP	2.575	0.1
Sertad1	Lass2	binding/association	HTP	2.575	0.1
Sertad1	Lass5	binding/association	HTP	2.575	0.1
Sertad1	Asb6	binding/association	HTP	2.575	0.1
Set	Csnk2a1	binding/association	HTP	2.575	0.1
Atp6v0a1	Psen1	binding/association	HTP	3.37	0.2
Sf1	Egr1	binding/association	HTP	999	0.8
Sf1	Pitx1	binding/association	HTP	999	0.8
Atp6v0a2	Cyth2	binding/association	HTP	8.67775	0.3
Sfpi1	Hoxa10	binding/association	HTP	8.67775	0.3
Sfrp1	Wnt3a	binding/association	HTP	2.575	0.1
Sfrp1	Wnt8a	binding/association	HTP	2.575	0.1
Sfrp2	Wnt3a	binding/association	HTP	8.67775	0.3
Sfrp2	Bmp1	binding/association	HTP	2.575	0.1
Sfrp4	Wnt3a	binding/association	HTP	2.575	0.1
Sftpd	Sftpd	binding/association	HTP	999	0.8
Sgta	Sgta	binding/association	HTP	2.575	0.1
Sh3gl2	Adam15	binding/association	HTP	2.575	0.1
Sh3gl2	Adam9	binding/association	HTP	8.67775	0.3
Sh3rf1	Siah1a	binding/association	HTP	999	0.8
Sh3rf1	Siah2	binding/association	HTP	999	0.8
Sh3rf1	Bnip3l	binding/association	HTP	999	0.8
Sh3yl1	Sh3d19	binding/association	HTP	999	0.8
Sh3yl1	Helz	binding/association	HTP	999	0.8
Shc1	Shcbp1	binding/association	HTP	2.575	0.1
Shc1	Tax1bp1	binding/association	HTP	2.575	0.1
Shc1	Brsk1	binding/association	HTP	8.67775	0.3
Shc1	Inppl1	binding/association	HTP	3.37	0.2
Shc1	Lrrk1	binding/association	HTP	2.575	0.1
Shc1	Arntl	binding/association	HTP	8.67775	0.3
Shc3	App	binding/association	HTP	50.4571	0.5
Siah1a	Dab1	binding/association	HTP	2.575	0.1
Sin3a	Smad4	binding/association	HTP	3.37	0.2
Sin3a	Suds3	binding/association	HTP	8.67775	0.3
Sin3a	Trp53	binding/association	HTP	3.37	0.2
Sin3a	Yy1	binding/association	HTP	3.37	0.2
Sin3b	Sin3a	binding/association	HTP	3.37	0.2
Sin3b	Rnf220	binding/association	HTP	3.37	0.2
Sirt1	Ccnb1	binding/association	HTP	3.37	0.2
Sirt1	Cdk1	binding/association	HTP	3.37	0.2
Sirt1	Clock	binding/association	HTP	2.575	0.1
Sirt1	Acaca	binding/association	HTP	2.575	0.1
Sirt1	Dyrk3	binding/association	HTP	999	0.8
Sirt1	Esrra	binding/association	HTP	8.67775	0.3
Sirt1	Hnf4a	binding/association	HTP	8.67775	0.3
Sirt1	Per2	binding/association	HTP	2.575	0.1
Sirt1	Pml	binding/association	HTP	999	0.8
Sirt1	Rarb	binding/association	HTP	8.67775	0.3
Sirt1	Rela	binding/association	HTP	3.37	0.2
Sirt5	Cps1	binding/association	HTP	2.575	0.1
Skor1	Tle1	binding/association	HTP	8.67775	0.3
Skor1	Ctbp1	binding/association	HTP	3.37	0.2
Skor1	Hdac1	binding/association	HTP	8.67775	0.3
Skor1	Lbx1	binding/association	HTP	999	0.8
Skp1a	Ppp1cc	binding/association	HTP	999	0.8
Slc12a2	Stk39	binding/association	HTP	999	0.8
Slc12a2	Oxsr1	binding/association	HTP	999	0.8
Slc12a6	Stk39	binding/association	HTP	999	0.8
Slc12a6	Oxsr1	binding/association	HTP	999	0.8
Atrx	Smc1a	binding/association	HTP	2.575	0.1
Atrx	Smc3	binding/association	HTP	8.67775	0.3
Atrx	Ar	binding/association	HTP	8.67775	0.3
Slc39a11	2010107G23Rik	binding/association	HTP	3.37	0.2
Atxn3	Ubd	binding/association	HTP	999	0.8
Atxn3	Vcp	binding/association	HTP	2.575	0.1
Smad1	Smarcd3	binding/association	HTP	2.575	0.1
Smad3	Myod1	binding/association	HTP	8.67775	0.3
Smad3	Pou5f1	binding/association	HTP	8.67775	0.3
Smad4	Smarcd3	binding/association	HTP	2.575	0.1
Smad4	Snai1	binding/association	HTP	8.67775	0.3
Smad4	Tlx3	binding/association	HTP	2.575	0.1
Smad4	Foxp1	binding/association	HTP	8.67775	0.3
Smad4	Gata5	binding/association	HTP	8.67775	0.3
Smad4	Gata6	binding/association	HTP	2.575	0.1
Smarca4	Smarcb1	binding/association	HTP	3.37	0.2
Smarca4	Smarcc2	binding/association	HTP	8.67775	0.3
Smarca4	Smarcd1	binding/association	HTP	2.575	0.1
Smarca4	Smarcd3	binding/association	HTP	2.575	0.1
Smarca4	Smarce1	binding/association	HTP	3.37	0.2
Smarca4	Srrm2	binding/association	HTP	2.575	0.1
Smarca4	Ss18l1	binding/association	HTP	2.575	0.1
Smarca4	Stat6	binding/association	HTP	999	0.8
Smarca4	Bcl7a	binding/association	HTP	2.575	0.1
Smarca4	Brd9	binding/association	HTP	50.4571	0.5
Smarca4	Cdx2	binding/association	HTP	8.67775	0.3
Smarca4	Ddx5	binding/association	HTP	66.0352	0.6
Smarca4	Dpf2	binding/association	HTP	2.575	0.1
Smarca4	Actg1	binding/association	HTP	8.67775	0.3
Smarca4	Actl6a	binding/association	HTP	8.67775	0.3
Smarca4	Gltscr1	binding/association	HTP	2.575	0.1
Smarca4	Kdm6a	binding/association	HTP	2.575	0.1
Smarca4	Mybbp1a	binding/association	HTP	3.37	0.2
Smarca4	Nono	binding/association	HTP	3.37	0.2
Smarca4	Nr1h4	binding/association	HTP	2.575	0.1
Smarca4	Numa1	binding/association	HTP	2.575	0.1
Smarca4	Pbrm1	binding/association	HTP	8.67775	0.3
Smarca4	Arid1a	binding/association	HTP	8.67775	0.3
Smarca4	Arid1b	binding/association	HTP	8.67775	0.3
Smarca4	Arid2	binding/association	HTP	2.575	0.1
Smarca4	Phf10	binding/association	HTP	2.575	0.1
Smarca5	Baz1a	binding/association	HTP	2.575	0.1
Smarcb1	Smarcc1	binding/association	HTP	999	0.8
Smarcc1	Smarca4	binding/association	HTP	999	0.8
Smarcc1	Smarcd1	binding/association	HTP	999	0.8
Smarcd1	Trp53	binding/association	HTP	999	0.8
Smurf2	Dvl1	binding/association	HTP	999	0.8
Aurkb	H3f3b	binding/association	HTP	999	0.8
Snap25	Camk2a	binding/association	HTP	8.67775	0.3
Snap25	Dnajc5	binding/association	HTP	3.37	0.2
Snap25	Gria1	binding/association	HTP	3.37	0.2
Snrpb	Smn1	binding/association	HTP	999	0.8
Sntb1	Snta1	binding/association	HTP	999	0.8
Sntb1	Dmd	binding/association	HTP	8.67775	0.3
Sntb1	Dtna	binding/association	HTP	999	0.8
Sntb2	Dmd	binding/association	HTP	8.67775	0.3
Socs1	Bclaf1	binding/association	HTP	3.37	0.2
Sox15	Pou5f1	binding/association	HTP	8.67775	0.3
Sox9	Nr5a1	binding/association	HTP	8.67775	0.3
Sp1	Creb1	binding/association	HTP	3.37	0.2
Sp3	Sin3a	binding/association	HTP	3.37	0.2
Axin1	Axin1	binding/association	HTP	8.67775	0.3
Axin1	Lrp5	binding/association	HTP	2.575	0.1
Axin1	Map3k1	binding/association	HTP	8.67775	0.3
Spata24	Tbp	binding/association	HTP	2.575	0.1
Spata24	Tbpl1	binding/association	HTP	2.575	0.1
Spc25	Spc24	binding/association	HTP	170.041	0.7
Spc25	Ndc80	binding/association	HTP	8.67775	0.3
Spc25	Nuf2	binding/association	HTP	8.67775	0.3
Sqstm1	Trim30a	binding/association	HTP	8.67775	0.3
Sqstm1	Ripk1	binding/association	HTP	3.37	0.2
Srebf1	Sirt1	binding/association	HTP	3.37	0.2
Srebf1	Ppargc1b	binding/association	HTP	3.37	0.2
Srf	Six5	binding/association	HTP	66.0352	0.6
Srf	Srebf2	binding/association	HTP	3.37	0.2
Srf	Elf1	binding/association	HTP	8.67775	0.3
Ss18	H3f3b	binding/association	HTP	2.575	0.1
Ssbp2	Ssbp2	binding/association	HTP	3.37	0.2
Ssbp2	Lass2	binding/association	HTP	2.575	0.1
Ssbp2	Lmo1	binding/association	HTP	2.575	0.1
Ssbp2	Lmo3	binding/association	HTP	2.575	0.1
Ssbp2	Lmx1a	binding/association	HTP	2.575	0.1
Ssbp2	Ankrd32	binding/association	HTP	2.575	0.1
Ssbp3	Tle6	binding/association	HTP	2.575	0.1
Ssbp3	Zfp398	binding/association	HTP	2.575	0.1
Ssbp3	Zfp592	binding/association	HTP	2.575	0.1
Ssbp3	Lass2	binding/association	HTP	2.575	0.1
Ssbp3	Ankrd32	binding/association	HTP	2.575	0.1
Ssbp3	Pwp1	binding/association	HTP	2.575	0.1
Ssbp3	Rai14	binding/association	HTP	2.575	0.1
Ssbp4	Tle6	binding/association	HTP	2.575	0.1
Ssbp4	Ankrd32	binding/association	HTP	2.575	0.1
Sssca1	Sssca1	binding/association	HTP	8.67775	0.3
Sssca1	Cct7	binding/association	HTP	2.575	0.1
Stam2	Ubd	binding/association	HTP	999	0.8
Stam2	Crk	binding/association	HTP	2.575	0.1
Stat2	Sept8	binding/association	HTP	2.575	0.1
Stat2	Ssna1	binding/association	HTP	3.37	0.2
Stat2	Bcar1	binding/association	HTP	66.0352	0.6
Stat2	Zfp36	binding/association	HTP	8.67775	0.3
Stat2	Cand1	binding/association	HTP	3.37	0.2
Stat2	Cops4	binding/association	HTP	3.37	0.2
Stat2	Cyth1	binding/association	HTP	2.575	0.1
Stat2	Appl2	binding/association	HTP	2.575	0.1
Stat2	Rcn2	binding/association	HTP	8.67775	0.3
Stat3	Cryab	binding/association	HTP	8.67775	0.3
Stat3	Hax1	binding/association	HTP	3.37	0.2
Stat3	Hspb1	binding/association	HTP	8.67775	0.3
Stat3	Huwe1	binding/association	HTP	3.37	0.2
Stat3	Krt1	binding/association	HTP	8.67775	0.3
Stat3	Mlf2	binding/association	HTP	3.37	0.2
Stat3	Pcbp1	binding/association	HTP	3.37	0.2
Stat5b	Stat5a	binding/association	HTP	170.041	0.7
Stat6	Parp14	binding/association	HTP	999	0.8
Stat6	Pfn1	binding/association	HTP	3.37	0.2
B9d1	Tmem231	binding/association	HTP	2.575	0.1
B9d1	Cc2d2a	binding/association	HTP	8.67775	0.3
B9d1	Ahi1	binding/association	HTP	8.67775	0.3
B9d1	Mks1	binding/association	HTP	8.67775	0.3
B9d2	B9d1	binding/association	HTP	8.67775	0.3
B9d2	Tctn1	binding/association	HTP	2.575	0.1
B9d2	Tctn2	binding/association	HTP	8.67775	0.3
B9d2	Tmem17	binding/association	HTP	2.575	0.1
B9d2	Tmem231	binding/association	HTP	2.575	0.1
B9d2	Cc2d2a	binding/association	HTP	8.67775	0.3
B9d2	Ahi1	binding/association	HTP	8.67775	0.3
B9d2	Mks1	binding/association	HTP	8.67775	0.3
Stip1	Atp5b	binding/association	HTP	2.575	0.1
Stip1	Arhgdia	binding/association	HTP	3.37	0.2
Stip1	Prdx1	binding/association	HTP	2.575	0.1
Stip1	Prdx2	binding/association	HTP	2.575	0.1
Stk39	Wnk4	binding/association	HTP	999	0.8
Stk39	Gsn	binding/association	HTP	999	0.8
Stk39	Hsph1	binding/association	HTP	999	0.8
Stk39	Otof	binding/association	HTP	999	0.8
Strada	Stk25	binding/association	HTP	8.67775	0.3
Stub1	Ube2n	binding/association	HTP	999	0.8
Stx12	Clstn1	binding/association	HTP	3.37	0.2
Stx12	App	binding/association	HTP	3.37	0.2
Stx1a	Stx1a	binding/association	HTP	66.0352	0.6
Stx1a	Stx1b	binding/association	HTP	170.041	0.7
Stx1a	Camk2a	binding/association	HTP	8.67775	0.3
Stx1a	Dlg4	binding/association	HTP	8.67775	0.3
Stx1a	Gria1	binding/association	HTP	8.67775	0.3
Bach1	Bach1	binding/association	HTP	170.041	0.7
Stx4a	Snap23	binding/association	HTP	170.041	0.7
Stx4a	Vamp8	binding/association	HTP	170.041	0.7
Suds3	Sin3b	binding/association	HTP	8.67775	0.3
Suds3	Suds3	binding/association	HTP	3.37	0.2
Sufu	Sufu	binding/association	HTP	999	0.8
Sufu	H2afy	binding/association	HTP	999	0.8
Sufu	Hmga1-rs1	binding/association	HTP	999	0.8
Supt4h1	Supt5h	binding/association	HTP	8.67775	0.3
Bag3	Hspb8	binding/association	HTP	2.575	0.1
Suv39h1	Rbbp7	binding/association	HTP	2.575	0.1
Suz12	Jarid2	binding/association	HTP	3.37	0.2
Syn1	Camk2a	binding/association	HTP	8.67775	0.3
Synj2bp	Lrp1	binding/association	HTP	8.67775	0.3
Syp	Slc1a2	binding/association	HTP	3.37	0.2
Syp	Snap25	binding/association	HTP	3.37	0.2
Syp	Syt1	binding/association	HTP	3.37	0.2
Syp	Vamp2	binding/association	HTP	3.37	0.2
Syp	Calm3	binding/association	HTP	3.37	0.2
Syt10	Syt10	binding/association	HTP	999	0.8
Syt6	Syt10	binding/association	HTP	999	0.8
Syt6	Syt6	binding/association	HTP	999	0.8
Syt9	Syt10	binding/association	HTP	999	0.8
Syt9	Syt6	binding/association	HTP	999	0.8
Syt9	Syt9	binding/association	HTP	999	0.8
Sytl5	Rab27a	binding/association	HTP	2.575	0.1
Syvn1	Ncstn	binding/association	HTP	3.37	0.2
Taf13	Taf11	binding/association	HTP	170.041	0.7
Taf1b	Tbp	binding/association	HTP	8.67775	0.3
Taf1c	Tbp	binding/association	HTP	2.575	0.1
Taf3	Tbp	binding/association	HTP	3.37	0.2
Taf3	Ctcf	binding/association	HTP	3.37	0.2
Tal1	Trim27	binding/association	HTP	8.67775	0.3
Tal1	Ldb1	binding/association	HTP	8.67775	0.3
Tal1	Lmo3	binding/association	HTP	2.575	0.1
Tal1	Rcor2	binding/association	HTP	8.67775	0.3
Tal2	Lmo1	binding/association	HTP	2.575	0.1
Tal2	Lmo3	binding/association	HTP	2.575	0.1
Tap1	B2m	binding/association	HTP	2.575	0.1
Bak1	Mcl1	binding/association	HTP	3.37	0.2
Tardbp	Tardbp	binding/association	HTP	2.575	0.1
Tax1bp1	Ube2d3	binding/association	HTP	8.67775	0.3
Tax1bp1	Chuk	binding/association	HTP	2.575	0.1
Tax1bp3	Rtkn	binding/association	HTP	8.67775	0.3
Tax1bp3	Ctnnb1	binding/association	HTP	2.575	0.1
Bard1	Trp53	binding/association	HTP	8.67775	0.3
Bard1	Pcbd1	binding/association	HTP	8.67775	0.3
Barhl1	Gtf2a1	binding/association	HTP	2.575	0.1
Tbk1	Traf2	binding/association	HTP	2.575	0.1
Barx1	Zfp641	binding/association	HTP	2.575	0.1
Barx1	Dlx1	binding/association	HTP	2.575	0.1
Tbp	Sp3	binding/association	HTP	3.37	0.2
Tbp	Taf13	binding/association	HTP	3.37	0.2
Tbpl2	Taf3	binding/association	HTP	3.37	0.2
Tbx15	Tlx3	binding/association	HTP	2.575	0.1
Barx2	Creb1	binding/association	HTP	8.67775	0.3
Barx2	Fos	binding/association	HTP	8.67775	0.3
Barx2	Atf2	binding/association	HTP	3.37	0.2
Tbx5	Smarca4	binding/association	HTP	3.37	0.2
Tcf21	Tcf3	binding/association	HTP	170.041	0.7
Tcf3	Smarce1	binding/association	HTP	3.37	0.2
Tcf3	Tcf3	binding/association	HTP	66.0352	0.6
Tcf3	Tle6	binding/association	HTP	3.37	0.2
Tcf3	Foxp1	binding/association	HTP	3.37	0.2
Tcf3	Id3	binding/association	HTP	170.041	0.7
Tcf3	Ivns1abp	binding/association	HTP	3.37	0.2
Tcf3	Olig1	binding/association	HTP	170.041	0.7
Tcf3	Olig2	binding/association	HTP	170.041	0.7
Tcf3	Phf17	binding/association	HTP	3.37	0.2
Tcf3	Ascl3	binding/association	HTP	50.4571	0.5
Tead2	Wwtr1	binding/association	HTP	3.37	0.2
Tef	Tef	binding/association	HTP	2.575	0.1
Baz1b	Smarca5	binding/association	HTP	8.67775	0.3
Tfap2a	Tfap2d	binding/association	HTP	2.575	0.1
Tfap2d	Tfap2d	binding/association	HTP	2.575	0.1
Tfg	Tfg	binding/association	HTP	170.041	0.7
Tgfb1i1	Tlx3	binding/association	HTP	2.575	0.1
Tgfb1i1	Git1	binding/association	HTP	999	0.8
Bbs1	Bbs2	binding/association	HTP	999	0.8
Bbs1	Bbs4	binding/association	HTP	999	0.8
Bbs1	Bbs7	binding/association	HTP	999	0.8
Tgfbr1	Nes	binding/association	HTP	999	0.8
Theg	Cct5	binding/association	HTP	999	0.8
Thrb	Ncor1	binding/association	HTP	2.575	0.1
Timeless	Timeless	binding/association	HTP	3.37	0.2
Timm22	Pdcd6	binding/association	HTP	2.575	0.1
Tjp1	Actn4	binding/association	HTP	170.041	0.7
Tle1	Tle1	binding/association	HTP	170.041	0.7
Tle4	Six3	binding/association	HTP	8.67775	0.3
Tle4	Six6	binding/association	HTP	8.67775	0.3
Tle6	Zfp473	binding/association	HTP	2.575	0.1
Tle6	2410004A20Rik	binding/association	HTP	3.37	0.2
Tlx3	Tbx21	binding/association	HTP	2.575	0.1
Tlx3	Tle6	binding/association	HTP	2.575	0.1
Tlx3	Trps1	binding/association	HTP	2.575	0.1
Tlx3	Tsc22d4	binding/association	HTP	2.575	0.1
Tlx3	Brip1	binding/association	HTP	2.575	0.1
Tlx3	Abtb1	binding/association	HTP	2.575	0.1
Tlx3	Cnot8	binding/association	HTP	2.575	0.1
Tlx3	Hnf4g	binding/association	HTP	2.575	0.1
Tlx3	Ankrd6	binding/association	HTP	2.575	0.1
Tmcc2	Apoe	binding/association	HTP	999	0.8
Tmem17	Tmem231	binding/association	HTP	999	0.8
Tmem173	Tbk1	binding/association	HTP	3.37	0.2
Tmf1	Stat3	binding/association	HTP	3.37	0.2
Tmf1	Tceb1	binding/association	HTP	3.37	0.2
Tmprss11e	Serpina5	binding/association	HTP	170.041	0.7
Tnf	Fadd	binding/association	HTP	3.37	0.2
Tnf	Ripk1	binding/association	HTP	3.37	0.2
Tnfaip1	Tnfaip1	binding/association	HTP	170.041	0.7
Tnfaip3	Ssbp2	binding/association	HTP	3.37	0.2
Tnfrsf11a	Traf3	binding/association	HTP	2.575	0.1
Tnfrsf11a	Kctd15	binding/association	HTP	2.575	0.1
Tnfrsf11a	Plekhg3	binding/association	HTP	2.575	0.1
Tnfrsf1a	Sec61b	binding/association	HTP	3.37	0.2
Tnfrsf1a	Slc2a1	binding/association	HTP	8.67775	0.3
Tnfrsf1a	Slc39a7	binding/association	HTP	8.67775	0.3
Tnfrsf1a	Slc9a1	binding/association	HTP	3.37	0.2
Tnfrsf1a	Son	binding/association	HTP	8.67775	0.3
Tnfrsf1a	Vapa	binding/association	HTP	3.37	0.2
Tnfrsf1a	Birc2	binding/association	HTP	8.67775	0.3
Tnfrsf1a	Ehmt2	binding/association	HTP	8.67775	0.3
Tnfrsf1a	Fadd	binding/association	HTP	170.041	0.7
Tnfrsf1a	Irak1	binding/association	HTP	170.041	0.7
Tnfrsf1a	Kars	binding/association	HTP	2.575	0.1
Tnfrsf1a	Rnf111	binding/association	HTP	3.37	0.2
Tnfrsf9	Tnfrsf9	binding/association	HTP	170.041	0.7
Tnfrsf9	Traf1	binding/association	HTP	999	0.8
Tnfrsf9	Traf2	binding/association	HTP	999	0.8
Tnfrsf9	Traf3	binding/association	HTP	999	0.8
Tnfsf18	Tnfrsf18	binding/association	HTP	8.67775	0.3
Tpd52	Tpd52	binding/association	HTP	8.67775	0.3
Tprgl	Tprgl	binding/association	HTP	3.37	0.2
Tpt1	Ncl	binding/association	HTP	3.37	0.2
Tradd	Krt14	binding/association	HTP	8.67775	0.3
Tradd	Krt16	binding/association	HTP	2.575	0.1
Tradd	Krt17	binding/association	HTP	999	0.8
Traf2	Sharpin	binding/association	HTP	3.37	0.2
Traf2	Slmap	binding/association	HTP	2.575	0.1
Traf2	Traf2	binding/association	HTP	170.041	0.7
Traf2	Traf3	binding/association	HTP	66.0352	0.6
Traf2	Ube2d3	binding/association	HTP	8.67775	0.3
Traf2	Birc2	binding/association	HTP	999	0.8
Traf2	Zmiz1	binding/association	HTP	3.37	0.2
Traf2	Bri3bp	binding/association	HTP	2.575	0.1
Traf2	Cog2	binding/association	HTP	2.575	0.1
Traf2	Fcrla	binding/association	HTP	2.575	0.1
Traf2	Il15ra	binding/association	HTP	2.575	0.1
Traf2	Lzts2	binding/association	HTP	2.575	0.1
Traf2	Mknk2	binding/association	HTP	8.67775	0.3
Bcl10	Mib2	binding/association	HTP	2.575	0.1
Traf6	Bag6	binding/association	HTP	2.575	0.1
Traf6	Traf3ip2	binding/association	HTP	8.67775	0.3
Traf6	Calr	binding/association	HTP	8.67775	0.3
Traf6	Cdc34	binding/association	HTP	170.041	0.7
Traf6	Fhl1	binding/association	HTP	8.67775	0.3
Traf6	Irak3	binding/association	HTP	8.67775	0.3
Traf6	Pxn	binding/association	HTP	8.67775	0.3
Trappc2	Trappc3	binding/association	HTP	999	0.8
Trappc2	Trappc5	binding/association	HTP	999	0.8
Trappc5	Trappc3	binding/association	HTP	999	0.8
Trib1	Cebpa	binding/association	HTP	2.575	0.1
Trib1	Rfwd2	binding/association	HTP	2.575	0.1
Trib2	Cebpa	binding/association	HTP	2.575	0.1
Trib2	Rfwd2	binding/association	HTP	2.575	0.1
Trib3	Atf4	binding/association	HTP	999	0.8
Trib3	Rfwd2	binding/association	HTP	2.575	0.1
Trim24	Rxra	binding/association	HTP	999	0.8
Trim24	Vdr	binding/association	HTP	999	0.8
Trim24	Cbx1	binding/association	HTP	999	0.8
Trim24	Cbx5	binding/association	HTP	999	0.8
Trim24	Esr1	binding/association	HTP	999	0.8
Trim24	Rara	binding/association	HTP	999	0.8
Trim27	Tcf3	binding/association	HTP	3.37	0.2
Trim27	Myod1	binding/association	HTP	3.37	0.2
Trim28	Chaf1a	binding/association	HTP	999	0.8
Bcl2l1	Siva1	binding/association	HTP	8.67775	0.3
Bcl2l1	Bad	binding/association	HTP	170.041	0.7
Bcl2l1	Bbc3	binding/association	HTP	999	0.8
Bcl2l1	Ppp1cc	binding/association	HTP	999	0.8
Trim66	Trim66	binding/association	HTP	999	0.8
Trim66	Cbx1	binding/association	HTP	999	0.8
Trim66	Cbx5	binding/association	HTP	999	0.8
Trim71	Trim71	binding/association	HTP	999	0.8
Trim71	Dcp1a	binding/association	HTP	999	0.8
Trim71	Dicer1	binding/association	HTP	2.575	0.1
Trim71	Edc4	binding/association	HTP	999	0.8
Trim71	Mov10	binding/association	HTP	999	0.8
Trip13	Trip13	binding/association	HTP	170.041	0.7
Trip13	Chd4	binding/association	HTP	3.37	0.2
Bcl2l11	Ywhab	binding/association	HTP	2.575	0.1
Bcl2l11	Dynlrb2	binding/association	HTP	8.67775	0.3
Bcl2l11	Mcl1	binding/association	HTP	999	0.8
Trp53	Sirt1	binding/association	HTP	3.37	0.2
Trp53	Sp1	binding/association	HTP	3.37	0.2
Trp53	Trp63	binding/association	HTP	8.67775	0.3
Trp53	Trp73	binding/association	HTP	170.041	0.7
Trp53	Ube2n	binding/association	HTP	3.37	0.2
Trp53	Pin1	binding/association	HTP	3.37	0.2
Trp53	Ppp1cc	binding/association	HTP	999	0.8
Trp63	Trp63	binding/association	HTP	8.67775	0.3
Trp63	Trp73	binding/association	HTP	8.67775	0.3
Trp73	Trp73	binding/association	HTP	170.041	0.7
Trpv5	Slc9a3r2	binding/association	HTP	8.67775	0.3
Tsc1	Ppp1ca	binding/association	HTP	999	0.8
Tsc22d3	Hoxa6	binding/association	HTP	2.575	0.1
Tsc22d3	Hoxb8	binding/association	HTP	2.575	0.1
Tsg101	Tsg101	binding/association	HTP	170.041	0.7
Tsg101	Ppp1cc	binding/association	HTP	999	0.8
Bcl6	Ppard	binding/association	HTP	8.67775	0.3
Bcl6b	Bcl6	binding/association	HTP	170.041	0.7
Tspan4	Cldn11	binding/association	HTP	2.575	0.1
Tssk2	Tfg	binding/association	HTP	2.575	0.1
Ttc3	Bmyc	binding/association	HTP	8.67775	0.3
Tyr	Tyr	binding/association	HTP	999	0.8
Tyr	Tyrp1	binding/association	HTP	999	0.8
Tyrp1	Tyrp1	binding/association	HTP	999	0.8
Ube2e1	Rnf220	binding/association	HTP	8.67775	0.3
Ube2e3	Rnf220	binding/association	HTP	8.67775	0.3
Ube2i	Tcf3	binding/association	HTP	999	0.8
Ube2v1	Ube2n	binding/association	HTP	999	0.8
Ube2v2	Ube2n	binding/association	HTP	999	0.8
Ube4b	Vcp	binding/association	HTP	8.67775	0.3
Ubp1	Zbtb3	binding/association	HTP	2.575	0.1
Ubp1	Gmeb1	binding/association	HTP	2.575	0.1
Ubp1	Gmeb2	binding/association	HTP	2.575	0.1
Ubtf	Polr1b	binding/association	HTP	3.37	0.2
Ubtf	Polr1e	binding/association	HTP	999	0.8
Ubtf	Rb1	binding/association	HTP	999	0.8
Ubxn1	Ngly1	binding/association	HTP	999	0.8
Uqcrc1	Uqcr10	binding/association	HTP	8.67775	0.3
Uqcrc1	Uqcr11	binding/association	HTP	66.0352	0.6
Uqcrc1	Uqcrc2	binding/association	HTP	170.041	0.7
Uqcrc1	Uqcrfs1	binding/association	HTP	170.041	0.7
Uqcrc1	Uqcrh	binding/association	HTP	3.37	0.2
Uqcrc1	Uqcrq	binding/association	HTP	999	0.8
Uqcrc1	Cyc1	binding/association	HTP	8.67775	0.3
Uqcrc1	mt-Cytb	binding/association	HTP	8.67775	0.3
Uqcrq	Uqcr10	binding/association	HTP	8.67775	0.3
Uqcrq	Uqcrc2	binding/association	HTP	170.041	0.7
Uqcrq	Uqcrfs1	binding/association	HTP	66.0352	0.6
Uqcrq	Uqcrh	binding/association	HTP	66.0352	0.6
Uqcrq	Cyc1	binding/association	HTP	66.0352	0.6
Uqcrq	mt-Cytb	binding/association	HTP	66.0352	0.6
Usp8	Stam2	binding/association	HTP	2.575	0.1
Vamp2	Cdc42	binding/association	HTP	8.67775	0.3
Bhlhe40	Bhlhe40	binding/association	HTP	170.041	0.7
Vasp	Pfn2	binding/association	HTP	999	0.8
Vav1	Plp2	binding/association	HTP	2.575	0.1
Vav2	Smn1	binding/association	HTP	8.67775	0.3
Vav2	Grb2	binding/association	HTP	50.4571	0.5
Vax2	Gmeb2	binding/association	HTP	2.575	0.1
Vax2	Gtf2a1	binding/association	HTP	2.575	0.1
Vcl	Raver1	binding/association	HTP	999	0.8
Vcp	Ncstn	binding/association	HTP	3.37	0.2
Vdr	Ncoa1	binding/association	HTP	999	0.8
Vil1	Khk	binding/association	HTP	999	0.8
Vldlr	Dab1	binding/association	HTP	999	0.8
Vps33b	Rab11a	binding/association	HTP	999	0.8
Bid	Bcl2l1	binding/association	HTP	170.041	0.7
Bid	Bid	binding/association	HTP	999	0.8
Vsx2	Pax6	binding/association	HTP	170.041	0.7
Vsx2	Rb1	binding/association	HTP	8.67775	0.3
Was	Ipo5	binding/association	HTP	3.37	0.2
Was	Arpc2	binding/association	HTP	3.37	0.2
Was	Arpc3	binding/association	HTP	3.37	0.2
Wasf2	6720456B07Rik	binding/association	HTP	3.37	0.2
Wasf2	Cep250	binding/association	HTP	2.575	0.1
Wasf2	Golga4	binding/association	HTP	2.575	0.1
Wasl	Snx5	binding/association	HTP	2.575	0.1
Birc2	Htra2	binding/association	HTP	999	0.8
Wdfy3	Atg5	binding/association	HTP	2.575	0.1
Birc3	Traf3	binding/association	HTP	999	0.8
Birc3	Myd88	binding/association	HTP	3.37	0.2
Birc7	Htra2	binding/association	HTP	999	0.8
Wdr5	Ash2l	binding/association	HTP	999	0.8
Wdr77	Ccnd1	binding/association	HTP	8.67775	0.3
Wnt1	Kl	binding/association	HTP	8.67775	0.3
Blnk	Sh3gl1	binding/association	HTP	50.4571	0.5
Blnk	Sh3kbp1	binding/association	HTP	50.4571	0.5
Blnk	Grap2	binding/association	HTP	170.041	0.7
Wnt5a	Ryk	binding/association	HTP	3.37	0.2
Wsb1	Tceb1	binding/association	HTP	2.575	0.1
Wwp2	Egr2	binding/association	HTP	2.575	0.1
Wwtr1	Wwtr1	binding/association	HTP	170.041	0.7
Xbp1	Gmeb2	binding/association	HTP	3.37	0.2
Xiap	Htra2	binding/association	HTP	999	0.8
Xrcc6	Xrcc5	binding/association	HTP	170.041	0.7
Yap1	Wwtr1	binding/association	HTP	170.041	0.7
Bmi1	Bmi1	binding/association	HTP	3.37	0.2
Bmi1	Cbx8	binding/association	HTP	8.67775	0.3
Bmi1	Dmap1	binding/association	HTP	3.37	0.2
Bmi1	Phc2	binding/association	HTP	999	0.8
Bmi1	Ring1	binding/association	HTP	3.37	0.2
Yy1	Sp3	binding/association	HTP	8.67775	0.3
Yy1	Ctcf	binding/association	HTP	8.67775	0.3
Yy1	Gon4l	binding/association	HTP	8.67775	0.3
Zbtb33	Zbtb33	binding/association	HTP	170.041	0.7
Zbtb48	Myocd	binding/association	HTP	2.575	0.1
Zbtb7a	Hdac1	binding/association	HTP	8.67775	0.3
Zdhhc13	Zbtb39	binding/association	HTP	2.575	0.1
Zdhhc6	Ssbp3	binding/association	HTP	2.575	0.1
Zdhhc6	Ssbp4	binding/association	HTP	2.575	0.1
Zfp11	Zfp473	binding/association	HTP	2.575	0.1
Zfp111	Gmeb1	binding/association	HTP	2.575	0.1
Zfp12	Zfp473	binding/association	HTP	2.575	0.1
Zfp191	Zfp446	binding/association	HTP	2.575	0.1
Zfp263	Zfp768	binding/association	HTP	2.575	0.1
Zfp275	Tle6	binding/association	HTP	2.575	0.1
Zfp275	Zfp292	binding/association	HTP	2.575	0.1
Zfp275	Cic	binding/association	HTP	2.575	0.1
Zfp275	Hdac10	binding/association	HTP	2.575	0.1
Zfp275	Ivns1abp	binding/association	HTP	2.575	0.1
Zfp275	Lass2	binding/association	HTP	2.575	0.1
Zfp275	Polr2b	binding/association	HTP	3.37	0.2
Zfp275	Asb15	binding/association	HTP	2.575	0.1
Zfp354a	Ssbp2	binding/association	HTP	2.575	0.1
Zfp354a	Myocd	binding/association	HTP	2.575	0.1
Zfp36	Ywhab	binding/association	HTP	2.575	0.1
Zfp36l1	Pcbd1	binding/association	HTP	3.37	0.2
Zfp467	Myocd	binding/association	HTP	2.575	0.1
Zfp513	Zfp473	binding/association	HTP	2.575	0.1
Zfp513	Mzf1	binding/association	HTP	8.67775	0.3
Zfp524	Zfp641	binding/association	HTP	2.575	0.1
Zfp623	Mzf1	binding/association	HTP	2.575	0.1
Zfp64	Zfp64	binding/association	HTP	8.67775	0.3
Zfp64	Gtf2a1	binding/association	HTP	2.575	0.1
Zfp688	Mzf1	binding/association	HTP	8.67775	0.3
Zfp768	Zfp473	binding/association	HTP	2.575	0.1
Zfpm1	Ctbp1	binding/association	HTP	3.37	0.2
Zfpm1	Ctbp2	binding/association	HTP	3.37	0.2
Zfpm1	Gata1	binding/association	HTP	999	0.8
Zfpm1	Mta2	binding/association	HTP	8.67775	0.3
Zfpm1	Rbbp7	binding/association	HTP	8.67775	0.3
Zfpm1	Rbbp8	binding/association	HTP	2.575	0.1
Zfyve27	Vapa	binding/association	HTP	3.37	0.2
Zic1	Zic2	binding/association	HTP	8.67775	0.3
Zscan2	Zfp513	binding/association	HTP	2.575	0.1
Zscan2	Mzf1	binding/association	HTP	2.575	0.1
Btg1	Cnot7	binding/association	HTP	50.4571	0.5
Btg1	Cnot8	binding/association	HTP	50.4571	0.5
Btg2	Cnot8	binding/association	HTP	50.4571	0.5
Btk	Smarce1	binding/association	HTP	2.575	0.1
Btk	Tuba1a	binding/association	HTP	2.575	0.1
Btk	Cbx1	binding/association	HTP	2.575	0.1
Btk	Ddx5	binding/association	HTP	8.67775	0.3
Btk	Eef1a2	binding/association	HTP	8.67775	0.3
Btk	Glul	binding/association	HTP	8.67775	0.3
Btk	H2afz	binding/association	HTP	8.67775	0.3
Btk	Aldoa	binding/association	HTP	2.575	0.1
Btk	Lox	binding/association	HTP	3.37	0.2
Btk	Luc7l3	binding/association	HTP	3.37	0.2
Btk	Mrc1	binding/association	HTP	2.575	0.1
Btk	Ap3b1	binding/association	HTP	8.67775	0.3
Btk	Pfkp	binding/association	HTP	8.67775	0.3
Btk	Ppm1g	binding/association	HTP	8.67775	0.3
Btk	Ppp3cb	binding/association	HTP	8.67775	0.3
Btk	Rpl7	binding/association	HTP	2.575	0.1
Btrc	Cdc25b	binding/association	HTP	999	0.8
Btrc	Per1	binding/association	HTP	2.575	0.1
Btrc	Per2	binding/association	HTP	2.575	0.1
Cacna1c	Dynlt1c	binding/association	HTP	2.575	0.1
Cacnb4	Tuba1c	binding/association	HTP	2.575	0.1
Cacnb4	Tubb4a	binding/association	HTP	2.575	0.1
Cacnb4	Cacna1d	binding/association	HTP	8.67775	0.3
Cadps	Sestd1	binding/association	HTP	2.575	0.1
Calm3	6330503K22Rik	binding/association	HTP	2.575	0.1
Calm3	Cep97	binding/association	HTP	2.575	0.1
Calr	Ces2a	binding/association	HTP	999	0.8
Calr	Pgrmc1	binding/association	HTP	999	0.8
Camk2a	Bag6	binding/association	HTP	2.575	0.1
Camk2a	Camk2b	binding/association	HTP	170.041	0.7
Camk2a	Abi1	binding/association	HTP	8.67775	0.3
Camk2a	Cpsf6	binding/association	HTP	2.575	0.1
Camk2a	Kpnb1	binding/association	HTP	8.67775	0.3
Camk2a	Paip1	binding/association	HTP	8.67775	0.3
Camk2a	Pdcd6ip	binding/association	HTP	2.575	0.1
Capn1	Ptpn5	binding/association	HTP	999	0.8
Carm1	Axin1	binding/association	HTP	999	0.8
Carm1	Mef2c	binding/association	HTP	3.37	0.2
Carm1	Ncoa2	binding/association	HTP	2.575	0.1
Cask	Syn1	binding/association	HTP	3.37	0.2
Cask	Tuba1c	binding/association	HTP	2.575	0.1
Cask	Tubb5	binding/association	HTP	3.37	0.2
Cask	Calm3	binding/association	HTP	3.37	0.2
Cask	Cltc	binding/association	HTP	2.575	0.1
Cask	Actb	binding/association	HTP	3.37	0.2
Cask	Lin7b	binding/association	HTP	170.041	0.7
Cask	Lin7c	binding/association	HTP	170.041	0.7
Cask	Apba2	binding/association	HTP	50.4571	0.5
Cask	Ppfia2	binding/association	HTP	3.37	0.2
Cask	Ppfia3	binding/association	HTP	66.0352	0.6
Casp3	Birc3	binding/association	HTP	999	0.8
Casp3	D6Wsu116e	binding/association	HTP	999	0.8
Casp3	Nucks1	binding/association	HTP	999	0.8
Casp6	Irak3	binding/association	HTP	3.37	0.2
Casp7	D6Wsu116e	binding/association	HTP	999	0.8
Casp7	Acta2	binding/association	HTP	999	0.8
Casp7	Hdgf	binding/association	HTP	999	0.8
Casp7	Mybbp1a	binding/association	HTP	999	0.8
Casp7	Pkm	binding/association	HTP	999	0.8
Casp8	Sqstm1	binding/association	HTP	999	0.8
Casp8ap2	Sumo1	binding/association	HTP	3.37	0.2
Cav1	Scp2	binding/association	HTP	999	0.8
Cav1	Actb	binding/association	HTP	999	0.8
Cav3	Ptrf	binding/association	HTP	999	0.8
Cbfb	Utp3	binding/association	HTP	999	0.8
Cbl	Shc1	binding/association	HTP	8.67775	0.3
Cbln1	Nrxn1	binding/association	HTP	999	0.8
Cbln1	Nrxn3	binding/association	HTP	999	0.8
Cbx1	Cbx1	binding/association	HTP	999	0.8
Cbx1	Chaf1a	binding/association	HTP	999	0.8
Cbx1	Hist1h3g	binding/association	HTP	999	0.8
Cbx2	Bmi1	binding/association	HTP	8.67775	0.3
Cbx5	Trim28	binding/association	HTP	999	0.8
Cbx5	Cbx5	binding/association	HTP	170.041	0.7
Cbx5	Chaf1a	binding/association	HTP	19.595	0.4
Cbx5	Chaf1b	binding/association	HTP	2.575	0.1
Cbx5	Pogz	binding/association	HTP	999	0.8
Cc2d2a	Tmem231	binding/association	HTP	999	0.8
Ccdc123	Pspc1	binding/association	HTP	2.575	0.1
Ccdc91	Ccdc91	binding/association	HTP	8.67775	0.3
Ccna1	Cdk2	binding/association	HTP	170.041	0.7
Ccna2	Cdk2	binding/association	HTP	999	0.8
Ccna2	Hist1h1a	binding/association	HTP	999	0.8
Ccnb3	Cdk2	binding/association	HTP	170.041	0.7
Ccnd1	Cryab	binding/association	HTP	3.37	0.2
Ccnd1	Itgb1	binding/association	HTP	999	0.8
Ccnd1	Ppp1cc	binding/association	HTP	999	0.8
Ccnd1	Prmt5	binding/association	HTP	3.37	0.2
Ccnd1	Rala	binding/association	HTP	3.37	0.2
Ccnd1	Ralb	binding/association	HTP	999	0.8
Ccnd2	Cdk4	binding/association	HTP	170.041	0.7
Ccnd3	Cdk4	binding/association	HTP	170.041	0.7
Ccnd3	Cdk6	binding/association	HTP	170.041	0.7
Ccnd3	Ppp1ca	binding/association	HTP	999	0.8
Ccnd3	Ppp1cc	binding/association	HTP	999	0.8
Ccne1	Cdk2	binding/association	HTP	999	0.8
Cct3	Cct2	binding/association	HTP	999	0.8
Cct5	Tcp1	binding/association	HTP	999	0.8
Cct7	Cct7	binding/association	HTP	170.041	0.7
Cd27	Traf2	binding/association	HTP	8.67775	0.3
Cd274	Cd274	binding/association	HTP	999	0.8
Cd274	Cd80	binding/association	HTP	999	0.8
Cd80	Cd80	binding/association	HTP	999	0.8
Cda	Cda	binding/association	HTP	170.041	0.7
Cdc20	Sirt2	binding/association	HTP	3.37	0.2
Cdc34	Ppp1ca	binding/association	HTP	999	0.8
Cdc34	Ppp1cc	binding/association	HTP	999	0.8
Cdc42	Pard6b	binding/association	HTP	170.041	0.7
Cdc42	Prkci	binding/association	HTP	170.041	0.7
Cdc42	Rac1	binding/association	HTP	170.041	0.7
Cdh2	Ret	binding/association	HTP	999	0.8
Cdk1	Ccna1	binding/association	HTP	170.041	0.7
Cdk1	Ccna2	binding/association	HTP	999	0.8
Cdk1	Ccnb2	binding/association	HTP	170.041	0.7
Cdk1	Ccne1	binding/association	HTP	170.041	0.7
Cdk1	Cdc25c	binding/association	HTP	8.67775	0.3
Cdk1	Myod1	binding/association	HTP	999	0.8
Cdk1	Nasp	binding/association	HTP	8.67775	0.3
Cdk1	Ppp1cc	binding/association	HTP	999	0.8
Cdk2	Ccne2	binding/association	HTP	170.041	0.7
Cdk4	Smarca4	binding/association	HTP	999	0.8
Cdk4	Wdr77	binding/association	HTP	999	0.8
Cdk4	Ppp1cc	binding/association	HTP	999	0.8
Cdk4	Prmt5	binding/association	HTP	999	0.8
Cdkn1a	Ccnb1	binding/association	HTP	66.0352	0.6
Cdkn1a	Ccnd1	binding/association	HTP	170.041	0.7
Cdkn1a	Cdk1	binding/association	HTP	66.0352	0.6
Cdkn1a	Cdk4	binding/association	HTP	170.041	0.7
Cdkn2a	Sp1	binding/association	HTP	3.37	0.2
Cdkn2a	Pex19	binding/association	HTP	999	0.8
Cdkn2a	Ppp1ca	binding/association	HTP	999	0.8
Cdkn2a	Ppp1cc	binding/association	HTP	999	0.8
Cdt1	Gmnn	binding/association	HTP	999	0.8
Cdt1	Mcm2	binding/association	HTP	8.67775	0.3
Cdt1	Mcm6	binding/association	HTP	999	0.8
Cdt1	Orc2	binding/association	HTP	999	0.8
Cdx1	Zfp82	binding/association	HTP	2.575	0.1
Cdx1	Dlx1	binding/association	HTP	2.575	0.1
Cdx1	Gtf2e1	binding/association	HTP	2.575	0.1
Cdx1	Nkx2-3	binding/association	HTP	8.67775	0.3
Cdx2	Zfp292	binding/association	HTP	2.575	0.1
Cdx2	Dlx5	binding/association	HTP	170.041	0.7
Cdx2	Hltf	binding/association	HTP	2.575	0.1
Cdx4	Dlx1	binding/association	HTP	2.575	0.1
Cdx4	Gtf2a1l	binding/association	HTP	2.575	0.1
Cebpa	Ddit3	binding/association	HTP	8.67775	0.3
Cebpa	Jdp2	binding/association	HTP	8.67775	0.3
Cebpb	Hmga1-rs1	binding/association	HTP	8.67775	0.3
Abcd2	Abcd2	binding/association	HTP	999	0.8
Abcd3	Rpn1	binding/association	HTP	8.67775	0.3
Abcd3	Rpn2	binding/association	HTP	3.37	0.2
Abcd3	Rps2	binding/association	HTP	2.575	0.1
Abcd3	Rps3	binding/association	HTP	2.575	0.1
Abcd3	Rps3a	binding/association	HTP	2.575	0.1
Abcd3	Rps4x	binding/association	HTP	2.575	0.1
Abcd3	Rps8	binding/association	HTP	2.575	0.1
Abcd3	Atp1a1	binding/association	HTP	8.67775	0.3
Abcd3	Atp1a3	binding/association	HTP	8.67775	0.3
Abcd3	Atp1a4	binding/association	HTP	8.67775	0.3
Abcd3	Rtn1	binding/association	HTP	3.37	0.2
Abcd3	S1pr1	binding/association	HTP	8.67775	0.3
Abcd3	Atp2b2	binding/association	HTP	8.67775	0.3
Abcd3	Sbf1	binding/association	HTP	2.575	0.1
Abcd3	Atp2b3	binding/association	HTP	8.67775	0.3
Abcd3	Scfd1	binding/association	HTP	2.575	0.1
Abcd3	Atp5a1	binding/association	HTP	8.67775	0.3
Abcd3	Atp5b	binding/association	HTP	8.67775	0.3
Abcd3	Atp5c1	binding/association	HTP	8.67775	0.3
Abcd3	Sept11	binding/association	HTP	2.575	0.1
Abcd3	Sept2	binding/association	HTP	2.575	0.1
Abcd3	Sept3	binding/association	HTP	2.575	0.1
Abcd3	Sept4	binding/association	HTP	8.67775	0.3
Abcd3	Sept6	binding/association	HTP	2.575	0.1
Abcd3	Sept7	binding/association	HTP	2.575	0.1
Abcd3	Sept8	binding/association	HTP	2.575	0.1
Abcd3	Sept9	binding/association	HTP	2.575	0.1
Abcd3	Atp6v0a1	binding/association	HTP	8.67775	0.3
Abcd3	Sfxn1	binding/association	HTP	8.67775	0.3
Abcd3	Sfxn3	binding/association	HTP	8.67775	0.3
Abcd3	Sfxn5	binding/association	HTP	8.67775	0.3
Abcd3	Atp6v0d1	binding/association	HTP	2.575	0.1
Abcd3	Atp6v1a	binding/association	HTP	8.67775	0.3
Abcd3	Shank2	binding/association	HTP	2.575	0.1
Abcd3	Shank3	binding/association	HTP	2.575	0.1
Abcd3	Atp6v1b2	binding/association	HTP	8.67775	0.3
Abcd3	Atp6v1e1	binding/association	HTP	3.37	0.2
Abcd3	Atp6v1h	binding/association	HTP	2.575	0.1
Abcd3	Slc12a5	binding/association	HTP	8.67775	0.3
Abcd3	Slc1a2	binding/association	HTP	3.37	0.2
Abcd3	Slc25a11	binding/association	HTP	8.67775	0.3
Abcd3	Slc25a12	binding/association	HTP	8.67775	0.3
Abcd3	Slc25a13	binding/association	HTP	8.67775	0.3
Abcd3	Slc25a22	binding/association	HTP	8.67775	0.3
Abcd3	Slc25a3	binding/association	HTP	8.67775	0.3
Abcd3	Slc25a4	binding/association	HTP	8.67775	0.3
Abcd3	Slc25a5	binding/association	HTP	8.67775	0.3
Abcd3	Slc30a3	binding/association	HTP	8.67775	0.3
Abcd3	Slc4a10	binding/association	HTP	8.67775	0.3
Abcd3	Slc4a3	binding/association	HTP	8.67775	0.3
Abcd3	Slc4a4	binding/association	HTP	2.575	0.1
Abcd3	Slc8a2	binding/association	HTP	3.37	0.2
Abcd3	Snap25	binding/association	HTP	2.575	0.1
Abcd3	Snd1	binding/association	HTP	3.37	0.2
Abcd3	Spnb2	binding/association	HTP	2.575	0.1
Abcd3	Src	binding/association	HTP	8.67775	0.3
Abcd3	Ssr1	binding/association	HTP	3.37	0.2
Abcd3	Stoml2	binding/association	HTP	8.67775	0.3
Abcd3	Stub1	binding/association	HTP	2.575	0.1
Abcd3	Stx12	binding/association	HTP	8.67775	0.3
Abcd3	Stx1a	binding/association	HTP	8.67775	0.3
Abcd3	Stxbp1	binding/association	HTP	8.67775	0.3
Abcd3	Stxbp5l	binding/association	HTP	3.37	0.2
Abcd3	Sucla2	binding/association	HTP	8.67775	0.3
Abcd3	Suclg1	binding/association	HTP	8.67775	0.3
Abcd3	Sv2a	binding/association	HTP	8.67775	0.3
Abcd3	Sycp1	binding/association	HTP	2.575	0.1
Abcd3	Syn1	binding/association	HTP	8.67775	0.3
Abcd3	Syn2	binding/association	HTP	8.67775	0.3
Abcd3	Syngr1	binding/association	HTP	8.67775	0.3
Abcd3	Syngr3	binding/association	HTP	8.67775	0.3
Abcd3	Synj1	binding/association	HTP	2.575	0.1
Abcd3	Synj2	binding/association	HTP	2.575	0.1
Abcd3	Syt1	binding/association	HTP	8.67775	0.3
Abcd3	Syt7	binding/association	HTP	8.67775	0.3
Abcd3	Tbk1	binding/association	HTP	8.67775	0.3
Abcd3	Tcp1	binding/association	HTP	8.67775	0.3
Abcd3	Tjp1	binding/association	HTP	2.575	0.1
Abcd3	Tmod2	binding/association	HTP	2.575	0.1
Abcd3	Bcan	binding/association	HTP	2.575	0.1
Abcd3	Tnr	binding/association	HTP	2.575	0.1
Abcd3	Tomm70a	binding/association	HTP	8.67775	0.3
Abcd3	Tpm1	binding/association	HTP	2.575	0.1
Abcd3	Tpm3	binding/association	HTP	2.575	0.1
Abcd3	Trim3	binding/association	HTP	2.575	0.1
Abcd3	Trim32	binding/association	HTP	2.575	0.1
Abcd3	Ttc35	binding/association	HTP	3.37	0.2
Abcd3	Tuba1a	binding/association	HTP	2.575	0.1
Abcd3	Bdh1	binding/association	HTP	8.67775	0.3
Abcd3	Unc13a	binding/association	HTP	2.575	0.1
Abcd3	Uqcrc1	binding/association	HTP	2.575	0.1
Abcd3	Uqcrc2	binding/association	HTP	2.575	0.1
Abcd3	Vapa	binding/association	HTP	8.67775	0.3
Abcd3	Vcp	binding/association	HTP	8.67775	0.3
Abcd3	Vdac1	binding/association	HTP	8.67775	0.3
Abcd3	Vdac2	binding/association	HTP	8.67775	0.3
Abcd3	Vdac3	binding/association	HTP	8.67775	0.3
Abcd3	Vps33a	binding/association	HTP	2.575	0.1
Abcd3	Vps41	binding/association	HTP	2.575	0.1
Abcd3	Vps45	binding/association	HTP	2.575	0.1
Abcd3	Bin1	binding/association	HTP	2.575	0.1
Abcd3	Ywhab	binding/association	HTP	2.575	0.1
Abcd3	Ywhae	binding/association	HTP	8.67775	0.3
Abcd3	Ywhag	binding/association	HTP	2.575	0.1
Abcd3	Ywhah	binding/association	HTP	2.575	0.1
Abcd3	Ywhaq	binding/association	HTP	2.575	0.1
Abcd3	Ywhaz	binding/association	HTP	8.67775	0.3
Abcd3	6330407J23Rik	binding/association	HTP	8.67775	0.3
Abcd3	Bsg	binding/association	HTP	8.67775	0.3
Abcd3	Bsn	binding/association	HTP	8.67775	0.3
Abcd3	C230096C10Rik	binding/association	HTP	3.37	0.2
Abcd3	Cacna1a	binding/association	HTP	2.575	0.1
Abcd3	Cacna1b	binding/association	HTP	8.67775	0.3
Abcd3	Cacna1c	binding/association	HTP	2.575	0.1
Abcd3	Cacna2d1	binding/association	HTP	2.575	0.1
Abcd3	Cacna2d2	binding/association	HTP	2.575	0.1
Abcd3	Cacna2d3	binding/association	HTP	8.67775	0.3
Abcd3	Camk2a	binding/association	HTP	8.67775	0.3
Abcd3	Camk2b	binding/association	HTP	8.67775	0.3
Abcd3	Camk2g	binding/association	HTP	8.67775	0.3
Abcd3	Camkv	binding/association	HTP	8.67775	0.3
Abcd3	Canx	binding/association	HTP	8.67775	0.3
Abcd3	Cask	binding/association	HTP	8.67775	0.3
Abcd3	Caskin1	binding/association	HTP	2.575	0.1
Abcd3	Ccdc109a	binding/association	HTP	3.37	0.2
Abcd3	Aak1	binding/association	HTP	8.67775	0.3
Abcd3	Cct2	binding/association	HTP	8.67775	0.3
Abcd3	Cct3	binding/association	HTP	8.67775	0.3
Abcd3	Cct4	binding/association	HTP	3.37	0.2
Abcd3	Cct5	binding/association	HTP	8.67775	0.3
Abcd3	Cct7	binding/association	HTP	8.67775	0.3
Abcd3	Cct8	binding/association	HTP	8.67775	0.3
Abcd3	Cdc42bpb	binding/association	HTP	8.67775	0.3
Abcd3	Abcb8	binding/association	HTP	170.041	0.7
Abcd3	Cdh2	binding/association	HTP	8.67775	0.3
Abcd3	Abcd2	binding/association	HTP	170.041	0.7
Abcd3	Chchd3	binding/association	HTP	8.67775	0.3
Abcd3	Abi1	binding/association	HTP	2.575	0.1
Abcd3	Cit	binding/association	HTP	8.67775	0.3
Abcd3	Ckap4	binding/association	HTP	3.37	0.2
Abcd3	Ckmt1	binding/association	HTP	3.37	0.2
Abcd3	Clip1	binding/association	HTP	2.575	0.1
Abcd3	Clip2	binding/association	HTP	2.575	0.1
Abcd3	Clmn	binding/association	HTP	8.67775	0.3
Abcd3	Cltb	binding/association	HTP	2.575	0.1
Abcd3	Cltc	binding/association	HTP	8.67775	0.3
Abcd3	Cnksr2	binding/association	HTP	2.575	0.1
Abcd3	Cnnm1	binding/association	HTP	3.37	0.2
Abcd3	Cntfr	binding/association	HTP	2.575	0.1
Abcd3	Cntn1	binding/association	HTP	2.575	0.1
Abcd3	Cntn2	binding/association	HTP	2.575	0.1
Abcd3	Cntnap1	binding/association	HTP	2.575	0.1
Abcd3	Copb2	binding/association	HTP	2.575	0.1
Abcd3	Crmp1	binding/association	HTP	2.575	0.1
Abcd3	Crtac1	binding/association	HTP	2.575	0.1
Abcd3	Csnk1a1	binding/association	HTP	8.67775	0.3
Abcd3	Csnk1e	binding/association	HTP	8.67775	0.3
Abcd3	Csnk2a1	binding/association	HTP	8.67775	0.3
Abcd3	Cspg5	binding/association	HTP	3.37	0.2
Abcd3	Ctnnb1	binding/association	HTP	2.575	0.1
Abcd3	Ctnnd1	binding/association	HTP	2.575	0.1
Abcd3	Cyc1	binding/association	HTP	3.37	0.2
Abcd3	Cyfip1	binding/association	HTP	2.575	0.1
Abcd3	Cyfip2	binding/association	HTP	2.575	0.1
Abcd3	D1Pas1	binding/association	HTP	8.67775	0.3
Abcd3	D3Bwg0562e	binding/association	HTP	2.575	0.1
Abcd3	D630045J12Rik	binding/association	HTP	3.37	0.2
Abcd3	Daam1	binding/association	HTP	2.575	0.1
Abcd3	Dbt	binding/association	HTP	8.67775	0.3
Abcd3	Dclk1	binding/association	HTP	8.67775	0.3
Abcd3	Dctn1	binding/association	HTP	2.575	0.1
Abcd3	Ddost	binding/association	HTP	3.37	0.2
Abcd3	Ddx1	binding/association	HTP	8.67775	0.3
Abcd3	Ddx3x	binding/association	HTP	8.67775	0.3
Abcd3	Ddx5	binding/association	HTP	8.67775	0.3
Abcd3	Decr1	binding/association	HTP	8.67775	0.3
Abcd3	Dhrs7b	binding/association	HTP	8.67775	0.3
Abcd3	Diras2	binding/association	HTP	2.575	0.1
Abcd3	Dlat	binding/association	HTP	2.575	0.1
Abcd3	Dld	binding/association	HTP	8.67775	0.3
Abcd3	Dlg1	binding/association	HTP	2.575	0.1
Abcd3	Dlg3	binding/association	HTP	2.575	0.1
Abcd3	Dlg4	binding/association	HTP	2.575	0.1
Abcd3	Dlst	binding/association	HTP	8.67775	0.3
Abcd3	Dnaja1	binding/association	HTP	8.67775	0.3
Abcd3	Dnaja2	binding/association	HTP	2.575	0.1
Abcd3	Dnajb6	binding/association	HTP	2.575	0.1
Abcd3	Dnajc11	binding/association	HTP	8.67775	0.3
Abcd3	Dnajc6	binding/association	HTP	2.575	0.1
Abcd3	Dnm1	binding/association	HTP	2.575	0.1
Abcd3	Dpm1	binding/association	HTP	2.575	0.1
Abcd3	Dpp6	binding/association	HTP	3.37	0.2
Abcd3	Acaca	binding/association	HTP	8.67775	0.3
Abcd3	Dpysl2	binding/association	HTP	8.67775	0.3
Abcd3	Dpysl4	binding/association	HTP	2.575	0.1
Abcd3	Dpysl5	binding/association	HTP	2.575	0.1
Abcd3	Dtna	binding/association	HTP	2.575	0.1
Abcd3	Dync1h1	binding/association	HTP	8.67775	0.3
Abcd3	Dync1i1	binding/association	HTP	2.575	0.1
Abcd3	Dync1i2	binding/association	HTP	2.575	0.1
Abcd3	Acat1	binding/association	HTP	8.67775	0.3
Abcd3	Eef1a1	binding/association	HTP	2.575	0.1
Abcd3	Eef1a2	binding/association	HTP	2.575	0.1
Abcd3	Eef1g	binding/association	HTP	2.575	0.1
Abcd3	Eef2	binding/association	HTP	2.575	0.1
Abcd3	Ehd3	binding/association	HTP	8.67775	0.3
Abcd3	Ehmt2	binding/association	HTP	2.575	0.1
Abcd3	Acly	binding/association	HTP	8.67775	0.3
Abcd3	Aco2	binding/association	HTP	3.37	0.2
Abcd3	Endog	binding/association	HTP	3.37	0.2
Abcd3	Epb4.1l1	binding/association	HTP	2.575	0.1
Abcd3	Epb4.1l3	binding/association	HTP	2.575	0.1
Abcd3	Epn2	binding/association	HTP	2.575	0.1
Abcd3	Eps15l1	binding/association	HTP	2.575	0.1
Abcd3	Erc1	binding/association	HTP	2.575	0.1
Abcd3	Acsbg1	binding/association	HTP	8.67775	0.3
Abcd3	Acsl6	binding/association	HTP	8.67775	0.3
Abcd3	Actb	binding/association	HTP	8.67775	0.3
Abcd3	Actn1	binding/association	HTP	2.575	0.1
Abcd3	Fasn	binding/association	HTP	8.67775	0.3
Abcd3	Actn4	binding/association	HTP	2.575	0.1
Abcd3	Actr1a	binding/association	HTP	8.67775	0.3
Abcd3	Actr2	binding/association	HTP	8.67775	0.3
Abcd3	Actr3	binding/association	HTP	8.67775	0.3
Abcd3	Fes	binding/association	HTP	8.67775	0.3
Abcd3	Flot1	binding/association	HTP	2.575	0.1
Abcd3	Flot2	binding/association	HTP	2.575	0.1
Abcd3	Fmnl1	binding/association	HTP	2.575	0.1
Abcd3	Fmnl3	binding/association	HTP	2.575	0.1
Abcd3	Fyn	binding/association	HTP	8.67775	0.3
Abcd3	Adam11	binding/association	HTP	8.67775	0.3
Abcd3	Gabbr1	binding/association	HTP	8.67775	0.3
Abcd3	Gabbr2	binding/association	HTP	8.67775	0.3
Abcd3	Gad1	binding/association	HTP	8.67775	0.3
Abcd3	Adam22	binding/association	HTP	8.67775	0.3
Abcd3	Adam23	binding/association	HTP	8.67775	0.3
Abcd3	Gdap1	binding/association	HTP	2.575	0.1
Abcd3	Gdap1l1	binding/association	HTP	2.575	0.1
Abcd3	Git1	binding/association	HTP	2.575	0.1
Abcd3	Gja1	binding/association	HTP	3.37	0.2
Abcd3	Gls2	binding/association	HTP	8.67775	0.3
Abcd3	Glud1	binding/association	HTP	3.37	0.2
Abcd3	Glul	binding/association	HTP	3.37	0.2
Abcd3	Gm2574	binding/association	HTP	2.575	0.1
Abcd3	Gm5506	binding/association	HTP	2.575	0.1
Abcd3	Add1	binding/association	HTP	2.575	0.1
Abcd3	Add2	binding/association	HTP	2.575	0.1
Abcd3	Add3	binding/association	HTP	2.575	0.1
Abcd3	Gnai2	binding/association	HTP	2.575	0.1
Abcd3	Gnao1	binding/association	HTP	8.67775	0.3
Abcd3	Gnaq	binding/association	HTP	2.575	0.1
Abcd3	Gnas	binding/association	HTP	8.67775	0.3
Abcd3	Gnaz	binding/association	HTP	2.575	0.1
Abcd3	Gnb5	binding/association	HTP	2.575	0.1
Abcd3	Gpd2	binding/association	HTP	8.67775	0.3
Abcd3	Gpm6a	binding/association	HTP	8.67775	0.3
Abcd3	Gpr158	binding/association	HTP	8.67775	0.3
Abcd3	Gria1	binding/association	HTP	2.575	0.1
Abcd3	Gria2	binding/association	HTP	2.575	0.1
Abcd3	Gria3	binding/association	HTP	8.67775	0.3
Abcd3	Grin1	binding/association	HTP	2.575	0.1
Abcd3	Grin2a	binding/association	HTP	8.67775	0.3
Abcd3	Grm1	binding/association	HTP	8.67775	0.3
Abcd3	Grm3	binding/association	HTP	8.67775	0.3
Abcd3	Grm5	binding/association	HTP	8.67775	0.3
Abcd3	Grm7	binding/association	HTP	8.67775	0.3
Abcd3	Gsn	binding/association	HTP	2.575	0.1
Abcd3	Adrbk1	binding/association	HTP	8.67775	0.3
Abcd3	Hadha	binding/association	HTP	3.37	0.2
Abcd3	Hadhb	binding/association	HTP	8.67775	0.3
Abcd3	Hapln1	binding/association	HTP	2.575	0.1
Abcd3	Hcn2	binding/association	HTP	8.67775	0.3
Abcd3	Hip1r	binding/association	HTP	2.575	0.1
Abcd3	Agap2	binding/association	HTP	2.575	0.1
Abcd3	Hk1	binding/association	HTP	3.37	0.2
Abcd3	Agk	binding/association	HTP	3.37	0.2
Abcd3	Hnrnpm	binding/association	HTP	2.575	0.1
Abcd3	Agpat5	binding/association	HTP	8.67775	0.3
Abcd3	Hsd17b12	binding/association	HTP	8.67775	0.3
Abcd3	Hsp90ab1	binding/association	HTP	8.67775	0.3
Abcd3	Hsp90b1	binding/association	HTP	8.67775	0.3
Abcd3	Hspa12a	binding/association	HTP	3.37	0.2
Abcd3	Hspa1b	binding/association	HTP	8.67775	0.3
Abcd3	Hspa5	binding/association	HTP	8.67775	0.3
Abcd3	Hspa8	binding/association	HTP	8.67775	0.3
Abcd3	Hspd1	binding/association	HTP	8.67775	0.3
Abcd3	Hsph1	binding/association	HTP	8.67775	0.3
Abcd3	Idh2	binding/association	HTP	8.67775	0.3
Abcd3	Idh3a	binding/association	HTP	8.67775	0.3
Abcd3	Idh3b	binding/association	HTP	8.67775	0.3
Abcd3	Idh3g	binding/association	HTP	8.67775	0.3
Abcd3	Aifm1	binding/association	HTP	2.575	0.1
Abcd3	Ina	binding/association	HTP	2.575	0.1
Abcd3	Iqsec1	binding/association	HTP	2.575	0.1
Abcd3	Iqsec2	binding/association	HTP	2.575	0.1
Abcd3	Itfg1	binding/association	HTP	3.37	0.2
Abcd3	Itpr1	binding/association	HTP	8.67775	0.3
Abcd3	Kalrn	binding/association	HTP	8.67775	0.3
Abcd3	Kcna2	binding/association	HTP	2.575	0.1
Abcd3	Kcnab2	binding/association	HTP	8.67775	0.3
Abcd3	Kcnq2	binding/association	HTP	2.575	0.1
Abcd3	Kel	binding/association	HTP	3.37	0.2
Abcd3	Akt2	binding/association	HTP	8.67775	0.3
Abcd3	Kif2a	binding/association	HTP	8.67775	0.3
Abcd3	Kif5b	binding/association	HTP	8.67775	0.3
Abcd3	Aldh1a1	binding/association	HTP	8.67775	0.3
Abcd3	Aldh1l1	binding/association	HTP	8.67775	0.3
Abcd3	Krt5	binding/association	HTP	8.67775	0.3
Abcd3	Krt6a	binding/association	HTP	2.575	0.1
Abcd3	Lasp1	binding/association	HTP	2.575	0.1
Abcd3	Aldoa	binding/association	HTP	2.575	0.1
Abcd3	Letm1	binding/association	HTP	3.37	0.2
Abcd3	Lgi1	binding/association	HTP	2.575	0.1
Abcd3	Aldoc	binding/association	HTP	8.67775	0.3
Abcd3	Lime1	binding/association	HTP	3.37	0.2
Abcd3	Lin7a	binding/association	HTP	2.575	0.1
Abcd3	Lin7b	binding/association	HTP	2.575	0.1
Abcd3	Lphn1	binding/association	HTP	8.67775	0.3
Abcd3	Lphn3	binding/association	HTP	8.67775	0.3
Abcd3	Lrp1	binding/association	HTP	8.67775	0.3
Abcd3	Lrrc59	binding/association	HTP	8.67775	0.3
Abcd3	Lrrc7	binding/association	HTP	2.575	0.1
Abcd3	Lsamp	binding/association	HTP	2.575	0.1
Abcd3	Macf1	binding/association	HTP	2.575	0.1
Abcd3	Mag	binding/association	HTP	8.67775	0.3
Abcd3	Maoa	binding/association	HTP	3.37	0.2
Abcd3	Mapt	binding/association	HTP	2.575	0.1
Abcd3	Mark2	binding/association	HTP	8.67775	0.3
Abcd3	Mccc1	binding/association	HTP	8.67775	0.3
Abcd3	Mdh2	binding/association	HTP	8.67775	0.3
Abcd3	Mecr	binding/association	HTP	8.67775	0.3
Abcd3	Amph	binding/association	HTP	2.575	0.1
Abcd3	Mink1	binding/association	HTP	8.67775	0.3
Abcd3	Mogs	binding/association	HTP	3.37	0.2
Abcd3	Mosc2	binding/association	HTP	3.37	0.2
Abcd3	Mpp2	binding/association	HTP	2.575	0.1
Abcd3	Mpp3	binding/association	HTP	2.575	0.1
Abcd3	Mpp6	binding/association	HTP	2.575	0.1
Abcd3	Mras	binding/association	HTP	2.575	0.1
Abcd3	Mtap1a	binding/association	HTP	2.575	0.1
Abcd3	Mtap1b	binding/association	HTP	8.67775	0.3
Abcd3	Mtap2	binding/association	HTP	2.575	0.1
Abcd3	Mtap6	binding/association	HTP	2.575	0.1
Abcd3	Mtch1	binding/association	HTP	8.67775	0.3
Abcd3	Mtch2	binding/association	HTP	8.67775	0.3
Abcd3	mt-Co2	binding/association	HTP	3.37	0.2
Abcd3	Mtdh	binding/association	HTP	3.37	0.2
Abcd3	Ank2	binding/association	HTP	2.575	0.1
Abcd3	Mtx2	binding/association	HTP	8.67775	0.3
Abcd3	Myh10	binding/association	HTP	8.67775	0.3
Abcd3	Myh14	binding/association	HTP	8.67775	0.3
Abcd3	Myh9	binding/association	HTP	8.67775	0.3
Abcd3	Myo18a	binding/association	HTP	8.67775	0.3
Abcd3	Myo1b	binding/association	HTP	8.67775	0.3
Abcd3	Myo1d	binding/association	HTP	8.67775	0.3
Abcd3	Myo5a	binding/association	HTP	8.67775	0.3
Abcd3	Naca	binding/association	HTP	2.575	0.1
Abcd3	Napa	binding/association	HTP	2.575	0.1
Abcd3	Napb	binding/association	HTP	2.575	0.1
Abcd3	Napg	binding/association	HTP	2.575	0.1
Abcd3	Nbea	binding/association	HTP	2.575	0.1
Abcd3	Ncam2	binding/association	HTP	8.67775	0.3
Abcd3	Ncan	binding/association	HTP	2.575	0.1
Abcd3	Nckap1	binding/association	HTP	3.37	0.2
Abcd3	Ndufa10	binding/association	HTP	3.37	0.2
Abcd3	Ndufv2	binding/association	HTP	3.37	0.2
Abcd3	Nedd4	binding/association	HTP	2.575	0.1
Abcd3	Nefl	binding/association	HTP	2.575	0.1
Abcd3	Nefm	binding/association	HTP	2.575	0.1
Abcd3	Negr1	binding/association	HTP	2.575	0.1
Abcd3	Nfasc	binding/association	HTP	8.67775	0.3
Abcd3	Nipsnap1	binding/association	HTP	8.67775	0.3
Abcd3	Nlgn1	binding/association	HTP	2.575	0.1
Abcd3	Nlgn2	binding/association	HTP	8.67775	0.3
Abcd3	Nlgn3	binding/association	HTP	8.67775	0.3
Abcd3	Nptn	binding/association	HTP	8.67775	0.3
Abcd3	Ap1b1	binding/association	HTP	2.575	0.1
Abcd3	Nsf	binding/association	HTP	8.67775	0.3
Abcd3	Ntm	binding/association	HTP	2.575	0.1
Abcd3	Ap2a1	binding/association	HTP	2.575	0.1
Abcd3	Ap2a2	binding/association	HTP	2.575	0.1
Abcd3	Ap2b1	binding/association	HTP	2.575	0.1
Abcd3	Ap2m1	binding/association	HTP	8.67775	0.3
Abcd3	Odz4	binding/association	HTP	8.67775	0.3
Abcd3	Ogdh	binding/association	HTP	2.575	0.1
Abcd3	Olfm1	binding/association	HTP	2.575	0.1
Abcd3	Ap3d1	binding/association	HTP	2.575	0.1
Abcd3	Ap3m2	binding/association	HTP	2.575	0.1
Abcd3	App	binding/association	HTP	3.37	0.2
Abcd3	Omg	binding/association	HTP	2.575	0.1
Abcd3	Opa1	binding/association	HTP	8.67775	0.3
Abcd3	Opcml	binding/association	HTP	8.67775	0.3
Abcd3	Orc1	binding/association	HTP	3.37	0.2
Abcd3	Arhgap39	binding/association	HTP	2.575	0.1
Abcd3	Pabpc1	binding/association	HTP	2.575	0.1
Abcd3	Pcca	binding/association	HTP	8.67775	0.3
Abcd3	Pde10a	binding/association	HTP	2.575	0.1
Abcd3	Arhgef2	binding/association	HTP	2.575	0.1
Abcd3	Pde2a	binding/association	HTP	2.575	0.1
Abcd3	Pdha1	binding/association	HTP	3.37	0.2
Abcd3	Pdhb	binding/association	HTP	2.575	0.1
Abcd3	Arhgef7	binding/association	HTP	2.575	0.1
Abcd3	Pex5l	binding/association	HTP	2.575	0.1
Abcd3	Pfkl	binding/association	HTP	8.67775	0.3
Abcd3	Pfkm	binding/association	HTP	8.67775	0.3
Abcd3	Pfkp	binding/association	HTP	8.67775	0.3
Abcd3	Pgam5	binding/association	HTP	3.37	0.2
Abcd3	Pgrmc1	binding/association	HTP	8.67775	0.3
Abcd3	Phb	binding/association	HTP	8.67775	0.3
Abcd3	Phb2	binding/association	HTP	8.67775	0.3
Abcd3	Picalm	binding/association	HTP	2.575	0.1
Abcd3	Pik3ca	binding/association	HTP	8.67775	0.3
Abcd3	Pip5k1c	binding/association	HTP	3.37	0.2
Abcd3	Plec	binding/association	HTP	2.575	0.1
Abcd3	Plxna1	binding/association	HTP	8.67775	0.3
Abcd3	Plxna2	binding/association	HTP	2.575	0.1
Abcd3	Armc10	binding/association	HTP	3.37	0.2
Abcd3	Arpc1a	binding/association	HTP	2.575	0.1
Abcd3	Ppap2b	binding/association	HTP	8.67775	0.3
Abcd3	Ppp1ca	binding/association	HTP	2.575	0.1
Abcd3	Ppp1r9b	binding/association	HTP	2.575	0.1
Abcd3	Ppp2ca	binding/association	HTP	2.575	0.1
Abcd3	Ppp2r1a	binding/association	HTP	2.575	0.1
Abcd3	Ppp3ca	binding/association	HTP	8.67775	0.3
Abcd3	Prkacb	binding/association	HTP	8.67775	0.3
Abcd3	Prkar2b	binding/association	HTP	8.67775	0.3
Abcd3	Prkcb	binding/association	HTP	8.67775	0.3
Abcd3	Prkce	binding/association	HTP	8.67775	0.3
Abcd3	Prps1	binding/association	HTP	8.67775	0.3
Abcd3	Prrt1	binding/association	HTP	3.37	0.2
Abcd3	Psma4	binding/association	HTP	2.575	0.1
Abcd3	Psmd14	binding/association	HTP	2.575	0.1
Abcd3	Ptprf	binding/association	HTP	8.67775	0.3
Abcd3	Ptprs	binding/association	HTP	8.67775	0.3
Abcd3	Pura	binding/association	HTP	2.575	0.1
Abcd3	Pycr1	binding/association	HTP	3.37	0.2
Abcd3	Rab12	binding/association	HTP	2.575	0.1
Abcd3	Rab3a	binding/association	HTP	2.575	0.1
Abcd3	Rab8a	binding/association	HTP	2.575	0.1
Abcd3	Astn2	binding/association	HTP	8.67775	0.3
Abcd3	Rala	binding/association	HTP	2.575	0.1
Abcd3	Ranbp9	binding/association	HTP	2.575	0.1
Abcd3	Rapgef4	binding/association	HTP	2.575	0.1
Abcd3	Atad3a	binding/association	HTP	8.67775	0.3
Abcd3	Rhot1	binding/association	HTP	2.575	0.1
Abcd3	Rp2h	binding/association	HTP	3.37	0.2
Abcd3	Rph3a	binding/association	HTP	2.575	0.1
Abcd3	Rpl13	binding/association	HTP	2.575	0.1
Abcd3	Rpl14	binding/association	HTP	2.575	0.1
Abcd3	Rpl4	binding/association	HTP	2.575	0.1
Abcd3	Rpl5	binding/association	HTP	2.575	0.1
Abcd3	Rpl6	binding/association	HTP	2.575	0.1
Abcd3	Rpl7	binding/association	HTP	2.575	0.1
Abcd3	Rplp0	binding/association	HTP	2.575	0.1
Cep290	Tuba1b	binding/association	HTP	3.37	0.2
Cep290	Tubb5	binding/association	HTP	3.37	0.2
Cep290	Calm3	binding/association	HTP	3.37	0.2
Cep290	Ccdc110	binding/association	HTP	3.37	0.2
Cep290	Cryab	binding/association	HTP	3.37	0.2
Cep290	Hspa8	binding/association	HTP	3.37	0.2
Cep290	Jup	binding/association	HTP	3.37	0.2
Cep290	Pcm1	binding/association	HTP	3.37	0.2
Cep72	Cep72	binding/association	HTP	3.37	0.2
Chfr	Aurka	binding/association	HTP	2.575	0.1
Chga	Chgb	binding/association	HTP	999	0.8
Chgb	Stx1a	binding/association	HTP	999	0.8
Chuk	Sestd1	binding/association	HTP	2.575	0.1
Chuk	Ddx39b	binding/association	HTP	8.67775	0.3
Chuk	Git1	binding/association	HTP	170.041	0.7
Chuk	Kif20b	binding/association	HTP	8.67775	0.3
Chuk	Arfip2	binding/association	HTP	2.575	0.1
Chuk	Pbxip1	binding/association	HTP	3.37	0.2
Chuk	Pex5	binding/association	HTP	2.575	0.1
Chuk	Ptprs	binding/association	HTP	50.4571	0.5
Chuk	Rab5a	binding/association	HTP	50.4571	0.5
Ciapin1	Glrx3	binding/association	HTP	999	0.8
Ciita	Ssbp3	binding/association	HTP	2.575	0.1
Ciita	Ssbp4	binding/association	HTP	2.575	0.1
Ciita	Tcf3	binding/association	HTP	3.37	0.2
Ciita	Ewsr1	binding/association	HTP	3.37	0.2
Ciita	Hoxa2	binding/association	HTP	3.37	0.2
Abi1	Sos1	binding/association	HTP	50.4571	0.5
Abi1	Sos2	binding/association	HTP	999	0.8
Abi1	Stx4a	binding/association	HTP	8.67775	0.3
Abi1	Tpm1	binding/association	HTP	8.67775	0.3
Abi1	6720456B07Rik	binding/association	HTP	3.37	0.2
Abi1	Dlgap4	binding/association	HTP	8.67775	0.3
Abi1	Eps8	binding/association	HTP	170.041	0.7
Abi1	Mink1	binding/association	HTP	2.575	0.1
Abi1	Ncf1	binding/association	HTP	50.4571	0.5
Abi1	Pacsin2	binding/association	HTP	50.4571	0.5
Abi1	Prex1	binding/association	HTP	50.4571	0.5
Abi1	Prpf40a	binding/association	HTP	3.37	0.2
Abi1	Prrc2a	binding/association	HTP	8.67775	0.3
Abi1	Rbm3	binding/association	HTP	8.67775	0.3
Cited2	Tfap2a	binding/association	HTP	2.575	0.1
Cited4	Lass2	binding/association	HTP	2.575	0.1
Cited4	Rai14	binding/association	HTP	2.575	0.1
Abl1	Dok1	binding/association	HTP	8.67775	0.3
Clock	Cry1	binding/association	HTP	999	0.8
Clock	Cry2	binding/association	HTP	8.67775	0.3
Clock	Ezh2	binding/association	HTP	3.37	0.2
Clock	Per1	binding/association	HTP	170.041	0.7
Clock	Per2	binding/association	HTP	999	0.8
Clock	Arntl	binding/association	HTP	999	0.8
Clstn1	Atp1a1	binding/association	HTP	3.37	0.2
Clstn1	Atp1a3	binding/association	HTP	3.37	0.2
Clstn1	Scamp1	binding/association	HTP	3.37	0.2
Clstn1	Scamp3	binding/association	HTP	3.37	0.2
Clstn1	Atp6v0a1	binding/association	HTP	3.37	0.2
Clstn1	Sez6l2	binding/association	HTP	3.37	0.2
Clstn1	Slc12a5	binding/association	HTP	3.37	0.2
Clstn1	Snap25	binding/association	HTP	3.37	0.2
Clstn1	Stx6	binding/association	HTP	3.37	0.2
Clstn1	Syn3	binding/association	HTP	3.37	0.2
Clstn1	Syp	binding/association	HTP	3.37	0.2
Clstn1	Syt1	binding/association	HTP	3.37	0.2
Clstn1	Tfrc	binding/association	HTP	3.37	0.2
Clstn1	Trf	binding/association	HTP	3.37	0.2
Clstn1	Vamp2	binding/association	HTP	3.37	0.2
Clstn1	Vamp3	binding/association	HTP	3.37	0.2
Clstn1	Vapa	binding/association	HTP	3.37	0.2
Clstn1	Vps45	binding/association	HTP	3.37	0.2
Clstn1	Calr	binding/association	HTP	3.37	0.2
Clstn1	Canx	binding/association	HTP	3.37	0.2
Clstn1	Cntn1	binding/association	HTP	2.575	0.1
Clstn1	Cpd	binding/association	HTP	3.37	0.2
Clstn1	Gap43	binding/association	HTP	3.37	0.2
Clstn1	Homer1	binding/association	HTP	3.37	0.2
Clstn1	Igf2r	binding/association	HTP	3.37	0.2
Clstn1	Lrp1	binding/association	HTP	3.37	0.2
Clstn1	M6pr	binding/association	HTP	3.37	0.2
Clstn1	Mbp	binding/association	HTP	3.37	0.2
Clstn1	Napa	binding/association	HTP	3.37	0.2
Clstn1	Rab14	binding/association	HTP	3.37	0.2
Cltc	Stx1a	binding/association	HTP	8.67775	0.3
Cltc	Stx1b	binding/association	HTP	8.67775	0.3
Cltc	Camk2a	binding/association	HTP	2.575	0.1
Cmtm2a	Ar	binding/association	HTP	999	0.8
Cnn3	Lcp1	binding/association	HTP	50.4571	0.5
Cnot6l	Rqcd1	binding/association	HTP	2.575	0.1
Cnot6l	Cnot1	binding/association	HTP	2.575	0.1
Cnot6l	Cnot3	binding/association	HTP	8.67775	0.3
Cnot6l	Cnot7	binding/association	HTP	2.575	0.1
Cnst	Gga1	binding/association	HTP	999	0.8
Cnst	Gga2	binding/association	HTP	999	0.8
Cnst	Gja1	binding/association	HTP	8.67775	0.3
Cnst	Gjb1	binding/association	HTP	8.67775	0.3
Cnst	Gjb3	binding/association	HTP	8.67775	0.3
Cnst	Gjc1	binding/association	HTP	8.67775	0.3
Cntn2	Tgfbr2	binding/association	HTP	999	0.8
Cobl	Dbnl	binding/association	HTP	999	0.8
Col8a1	Col8a1	binding/association	HTP	999	0.8
Cops2	Axin1	binding/association	HTP	2.575	0.1
Cops2	Btrc	binding/association	HTP	2.575	0.1
Cops2	Cul1	binding/association	HTP	8.67775	0.3
Cops2	Lrp6	binding/association	HTP	2.575	0.1
Cops2	Rbx1	binding/association	HTP	2.575	0.1
Cops5	Vcp	binding/association	HTP	2.575	0.1
Cp	Slc40a1	binding/association	HTP	2.575	0.1
Cpeb3	Neurl1a	binding/association	HTP	999	0.8
Creb1	Creb1	binding/association	HTP	66.0352	0.6
Creb3l4	Crem	binding/association	HTP	50.4571	0.5
Creb3l4	Ddx41	binding/association	HTP	2.575	0.1
Creb3l4	Ddx5	binding/association	HTP	2.575	0.1
Crebbp	Wwtr1	binding/association	HTP	3.37	0.2
Crebbp	Ctnnb1	binding/association	HTP	3.37	0.2
Crebbp	Rela	binding/association	HTP	2.575	0.1
Crebl2	Creb1	binding/association	HTP	66.0352	0.6
Crebzf	Esrrg	binding/association	HTP	8.67775	0.3
Crem	Hira	binding/association	HTP	8.67775	0.3
Crk	Avil	binding/association	HTP	2.575	0.1
Crk	Pik3cb	binding/association	HTP	19.595	0.4
Crk	Pik3r2	binding/association	HTP	19.595	0.4
Crk	Plec	binding/association	HTP	2.575	0.1
Crkl	Nckipsd	binding/association	HTP	19.595	0.4
Cry1	Sin3b	binding/association	HTP	3.37	0.2
Cry1	Timeless	binding/association	HTP	3.37	0.2
Cry1	Cry2	binding/association	HTP	170.041	0.7
Cryge	Myh3	binding/association	HTP	2.575	0.1
Csf1	Sirpa	binding/association	HTP	8.67775	0.3
Csf1	Slc7a1	binding/association	HTP	3.37	0.2
Csf1	Src	binding/association	HTP	8.67775	0.3
Csf1	Syk	binding/association	HTP	8.67775	0.3
Csf1	Camkk2	binding/association	HTP	2.575	0.1
Csf1	Celsr3	binding/association	HTP	3.37	0.2
Csf1	Flnb	binding/association	HTP	2.575	0.1
Csf1	Ak1	binding/association	HTP	3.37	0.2
Csf1	Itm2b	binding/association	HTP	3.37	0.2
Csf1	Map3k3	binding/association	HTP	2.575	0.1
Csf1	Map3k5	binding/association	HTP	8.67775	0.3
Csf1	Mark2	binding/association	HTP	8.67775	0.3
Csf1	Mknk2	binding/association	HTP	2.575	0.1
Csf1	Myd88	binding/association	HTP	3.37	0.2
Csf1	Myh10	binding/association	HTP	2.575	0.1
Csf1	Myh9	binding/association	HTP	8.67775	0.3
Csf1	Myo1a	binding/association	HTP	2.575	0.1
Csf1	Myo1c	binding/association	HTP	2.575	0.1
Csf1	Myo1g	binding/association	HTP	2.575	0.1
Csf1	Myo5a	binding/association	HTP	8.67775	0.3
Csf1	Anxa1	binding/association	HTP	3.37	0.2
Csf1	Opa1	binding/association	HTP	3.37	0.2
Csf1	Pik3r1	binding/association	HTP	8.67775	0.3
Csf1	Ppp1r3a	binding/association	HTP	3.37	0.2
Csf1	Rgs14	binding/association	HTP	3.37	0.2
Csf1r	Csf1r	binding/association	HTP	170.041	0.7
Csf3r	Wsb1	binding/association	HTP	999	0.8
Csf3r	Wsb2	binding/association	HTP	999	0.8
Csf3r	Fzr1	binding/association	HTP	999	0.8
Csnk1a1	Cops2	binding/association	HTP	999	0.8
Csnk1e	Dvl1	binding/association	HTP	999	0.8
Csnk1e	Dvl2	binding/association	HTP	999	0.8
Csnk2b	Tcte3	binding/association	HTP	999	0.8
Ctbp1	Hdac9	binding/association	HTP	3.37	0.2
Ctbp2	Ctbp2	binding/association	HTP	999	0.8
Ctbp2	Egflam	binding/association	HTP	999	0.8
Ctbp2	Hipk1	binding/association	HTP	999	0.8
Ctbp2	Klf3	binding/association	HTP	999	0.8
Ctcf	Atrx	binding/association	HTP	8.67775	0.3
Ctcf	Chd8	binding/association	HTP	8.67775	0.3
Ctcfl	Prmt7	binding/association	HTP	999	0.8
Ctnnb1	Smarca4	binding/association	HTP	3.37	0.2
Ctnnb1	Mapk8	binding/association	HTP	2.575	0.1
Ctnnb1	Mapk9	binding/association	HTP	2.575	0.1
Ctnnb1	Rac1	binding/association	HTP	8.67775	0.3
Ctnnd1	Zbtb33	binding/association	HTP	999	0.8
Ctr9	Wdr61	binding/association	HTP	2.575	0.1
Ctr9	Ctr9	binding/association	HTP	170.041	0.7
Ctr9	Leo1	binding/association	HTP	2.575	0.1
Cttn	Wipf1	binding/association	HTP	999	0.8
Cul3	Klhl10	binding/association	HTP	2.575	0.1
Cul3	Nfe2l2	binding/association	HTP	3.37	0.2
Cul5	Socs1	binding/association	HTP	2.575	0.1
Cul5	Socs2	binding/association	HTP	2.575	0.1
Cul5	Socs4	binding/association	HTP	2.575	0.1
Cul5	Socs5	binding/association	HTP	2.575	0.1
Cul5	Socs6	binding/association	HTP	2.575	0.1
Cul5	Socs7	binding/association	HTP	2.575	0.1
Cxcr5	Ctr9	binding/association	HTP	2.575	0.1
Cxxc1	Zfp768	binding/association	HTP	2.575	0.1
Cyld	Bcl3	binding/association	HTP	999	0.8
Dab1	Aplp1	binding/association	HTP	19.595	0.4
Dab1	Aplp2	binding/association	HTP	50.4571	0.5
Dab1	Pcdh18	binding/association	HTP	2.575	0.1
Dach1	Sin3a	binding/association	HTP	8.67775	0.3
Dach1	Six1	binding/association	HTP	3.37	0.2
Dach1	Six6	binding/association	HTP	8.67775	0.3
Dact1	Dvl1	binding/association	HTP	999	0.8
Dag1	Egflam	binding/association	HTP	8.67775	0.3
Dapk1	Dlg4	binding/association	HTP	2.575	0.1
Dapk1	Grin1	binding/association	HTP	8.67775	0.3
Dapk3	Dapk3	binding/association	HTP	999	0.8
Dapk3	Pawr	binding/association	HTP	999	0.8
Dapk3	Atf4	binding/association	HTP	999	0.8
Dazl	Dazl	binding/association	HTP	999	0.8
Dbn1	Gja1	binding/association	HTP	999	0.8
Dbp	Tef	binding/association	HTP	2.575	0.1
Dbp	Hlf	binding/association	HTP	2.575	0.1
Dctn4	Ank2	binding/association	HTP	999	0.8
Ddx41	Tbk1	binding/association	HTP	8.67775	0.3
Ddx58	Ddx60	binding/association	HTP	2.575	0.1
Dffa	Dffb	binding/association	HTP	8.67775	0.3
Dgkz	Rb1	binding/association	HTP	8.67775	0.3
Dhx58	Ddx60	binding/association	HTP	2.575	0.1
Diap1	Baiap2	binding/association	HTP	999	0.8
Diap1	Htra2	binding/association	HTP	999	0.8
Disc1	Gsk3b	binding/association	HTP	2.575	0.1
Dixdc1	Axin1	binding/association	HTP	2.575	0.1
Dlg1	Dlg4	binding/association	HTP	170.041	0.7
Dlg1	Lrfn1	binding/association	HTP	999	0.8
Dlg1	Lrfn2	binding/association	HTP	999	0.8
Dlg3	Dlg4	binding/association	HTP	170.041	0.7
Dlg3	Lrfn2	binding/association	HTP	50.4571	0.5
Dlg4	Rps3	binding/association	HTP	8.67775	0.3
Dlg4	Rpsa	binding/association	HTP	8.67775	0.3
Dlg4	Atp1b1	binding/association	HTP	2.575	0.1
Dlg4	Atp1b2	binding/association	HTP	8.67775	0.3
Dlg4	Atp2b1	binding/association	HTP	2.575	0.1
Dlg4	Atp2b4	binding/association	HTP	2.575	0.1
Dlg4	Atp4a	binding/association	HTP	2.575	0.1
Dlg4	Scrn1	binding/association	HTP	3.37	0.2
Dlg4	Atp5a1	binding/association	HTP	2.575	0.1
Dlg4	Atp5b	binding/association	HTP	2.575	0.1
Dlg4	Atp5c1	binding/association	HTP	2.575	0.1
Dlg4	Sept11	binding/association	HTP	8.67775	0.3
Dlg4	Sept2	binding/association	HTP	8.67775	0.3
Dlg4	Sf3b3	binding/association	HTP	2.575	0.1
Dlg4	Atp6v0d1	binding/association	HTP	3.37	0.2
Dlg4	Sh3gl2	binding/association	HTP	170.041	0.7
Dlg4	Sh3glb2	binding/association	HTP	8.67775	0.3
Dlg4	Atp6v1a	binding/association	HTP	2.575	0.1
Dlg4	Atp6v1b2	binding/association	HTP	8.67775	0.3
Dlg4	Sirt2	binding/association	HTP	3.37	0.2
Dlg4	Slc1a2	binding/association	HTP	2.575	0.1
Dlg4	Slc1a3	binding/association	HTP	2.575	0.1
Dlg4	Slc25a12	binding/association	HTP	2.575	0.1
Dlg4	Slc25a13	binding/association	HTP	2.575	0.1
Dlg4	Slc25a22	binding/association	HTP	2.575	0.1
Dlg4	Slc25a31	binding/association	HTP	2.575	0.1
Dlg4	Slc25a4	binding/association	HTP	2.575	0.1
Dlg4	Slc25a5	binding/association	HTP	2.575	0.1
Dlg4	Slc2a1	binding/association	HTP	8.67775	0.3
Dlg4	Slc9a3r1	binding/association	HTP	170.041	0.7
Dlg4	Snap25	binding/association	HTP	999	0.8
Dlg4	Snca	binding/association	HTP	3.37	0.2
Dlg4	Sod1	binding/association	HTP	8.67775	0.3
Dlg4	Spna2	binding/association	HTP	50.4571	0.5
Dlg4	Spnb2	binding/association	HTP	2.575	0.1
Dlg4	St13	binding/association	HTP	8.67775	0.3
Dlg4	Stip1	binding/association	HTP	8.67775	0.3
Dlg4	Stx1b	binding/association	HTP	999	0.8
Dlg4	Stxbp1	binding/association	HTP	8.67775	0.3
Dlg4	Sucla2	binding/association	HTP	2.575	0.1
Dlg4	Syn1	binding/association	HTP	3.37	0.2
Dlg4	Syn2	binding/association	HTP	3.37	0.2
Dlg4	Syt1	binding/association	HTP	8.67775	0.3
Dlg4	Baiap2	binding/association	HTP	170.041	0.7
Dlg4	Basp1	binding/association	HTP	3.37	0.2
Dlg4	Traf3	binding/association	HTP	2.575	0.1
Dlg4	Tuba1b	binding/association	HTP	2.575	0.1
Dlg4	Tuba1c	binding/association	HTP	3.37	0.2
Dlg4	Tuba4a	binding/association	HTP	3.37	0.2
Dlg4	Tubb2a	binding/association	HTP	8.67775	0.3
Dlg4	Tubb4b	binding/association	HTP	3.37	0.2
Dlg4	Tubb6	binding/association	HTP	8.67775	0.3
Dlg4	Uba52	binding/association	HTP	50.4571	0.5
Dlg4	Ube2v1	binding/association	HTP	2.575	0.1
Dlg4	Ube2v2	binding/association	HTP	2.575	0.1
Dlg4	Vamp3	binding/association	HTP	3.37	0.2
Dlg4	Vdac1	binding/association	HTP	2.575	0.1
Dlg4	Vdac2	binding/association	HTP	2.575	0.1
Dlg4	Vdac3	binding/association	HTP	2.575	0.1
Dlg4	Vmac	binding/association	HTP	3.37	0.2
Dlg4	Ywhae	binding/association	HTP	2.575	0.1
Dlg4	Ywhag	binding/association	HTP	3.37	0.2
Dlg4	Btbd11	binding/association	HTP	2.575	0.1
Dlg4	Cacng2	binding/association	HTP	8.67775	0.3
Dlg4	Camk2a	binding/association	HTP	999	0.8
Dlg4	Camk2b	binding/association	HTP	2.575	0.1
Dlg4	Camk2d	binding/association	HTP	8.67775	0.3
Dlg4	Cit	binding/association	HTP	8.67775	0.3
Dlg4	Ablim1	binding/association	HTP	8.67775	0.3
Dlg4	Cltc	binding/association	HTP	8.67775	0.3
Dlg4	Abr	binding/association	HTP	50.4571	0.5
Dlg4	Cntn1	binding/association	HTP	50.4571	0.5
Dlg4	Cpne7	binding/association	HTP	2.575	0.1
Dlg4	Cs	binding/association	HTP	2.575	0.1
Dlg4	Cux2	binding/association	HTP	2.575	0.1
Dlg4	Cyfip2	binding/association	HTP	3.37	0.2
Dlg4	Dlgap1	binding/association	HTP	8.67775	0.3
Dlg4	Dlgap2	binding/association	HTP	8.67775	0.3
Dlg4	Dlgap3	binding/association	HTP	8.67775	0.3
Dlg4	Dlgap4	binding/association	HTP	8.67775	0.3
Dlg4	Dstn	binding/association	HTP	2.575	0.1
Dlg4	Eef1g	binding/association	HTP	2.575	0.1
Dlg4	Actg1	binding/association	HTP	2.575	0.1
Dlg4	Actn1	binding/association	HTP	2.575	0.1
Dlg4	Actn4	binding/association	HTP	8.67775	0.3
Dlg4	Fbxo2	binding/association	HTP	2.575	0.1
Dlg4	Fbxo6	binding/association	HTP	8.67775	0.3
Dlg4	Adam22	binding/association	HTP	2.575	0.1
Dlg4	Gnb1	binding/association	HTP	2.575	0.1
Dlg4	Grb2	binding/association	HTP	50.4571	0.5
Dlg4	Gria1	binding/association	HTP	8.67775	0.3
Dlg4	Gria2	binding/association	HTP	8.67775	0.3
Dlg4	Gria3	binding/association	HTP	8.67775	0.3
Dlg4	Grm3	binding/association	HTP	8.67775	0.3
Dlg4	Gstp1	binding/association	HTP	8.67775	0.3
Dlg4	Hist1h2bp	binding/association	HTP	2.575	0.1
Dlg4	Hsp90ab1	binding/association	HTP	8.67775	0.3
Dlg4	Hspa1l	binding/association	HTP	2.575	0.1
Dlg4	Hspa8	binding/association	HTP	2.575	0.1
Dlg4	Hspd1	binding/association	HTP	2.575	0.1
Dlg4	Ina	binding/association	HTP	8.67775	0.3
Dlg4	Iqsec1	binding/association	HTP	2.575	0.1
Dlg4	Iqsec2	binding/association	HTP	8.67775	0.3
Dlg4	Jak3	binding/association	HTP	2.575	0.1
Dlg4	Kcna1	binding/association	HTP	2.575	0.1
Dlg4	Kcnab2	binding/association	HTP	3.37	0.2
Dlg4	Kcnj16	binding/association	HTP	2.575	0.1
Dlg4	Aldh2	binding/association	HTP	2.575	0.1
Dlg4	Aldh5a1	binding/association	HTP	2.575	0.1
Dlg4	Lgi1	binding/association	HTP	3.37	0.2
Dlg4	Aldoc	binding/association	HTP	2.575	0.1
Dlg4	Lrfn2	binding/association	HTP	50.4571	0.5
Dlg4	Lrrtm1	binding/association	HTP	2.575	0.1
Dlg4	Mapk1	binding/association	HTP	8.67775	0.3
Dlg4	Mapk3	binding/association	HTP	8.67775	0.3
Dlg4	Mtap1a	binding/association	HTP	2.575	0.1
Dlg4	Mtpn	binding/association	HTP	2.575	0.1
Dlg4	Myl6	binding/association	HTP	2.575	0.1
Dlg4	Napa	binding/association	HTP	2.575	0.1
Dlg4	Napb	binding/association	HTP	2.575	0.1
Dlg4	Ncald	binding/association	HTP	2.575	0.1
Dlg4	Ncdn	binding/association	HTP	3.37	0.2
Dlg4	Anks1	binding/association	HTP	170.041	0.7
Dlg4	Nefl	binding/association	HTP	8.67775	0.3
Dlg4	Nefm	binding/association	HTP	8.67775	0.3
Dlg4	Neto1	binding/association	HTP	2.575	0.1
Dlg4	Nlgn2	binding/association	HTP	2.575	0.1
Dlg4	Nlgn3	binding/association	HTP	8.67775	0.3
Dlg4	Anxa5	binding/association	HTP	8.67775	0.3
Dlg4	Nptn	binding/association	HTP	2.575	0.1
Dlg4	Nsf	binding/association	HTP	8.67775	0.3
Dlg4	Ap2a1	binding/association	HTP	3.37	0.2
Dlg4	Arc	binding/association	HTP	3.37	0.2
Dlg4	Arf1	binding/association	HTP	2.575	0.1
Dlg4	Arf3	binding/association	HTP	2.575	0.1
Dlg4	Pcbp1	binding/association	HTP	2.575	0.1
Dlg4	Pcbp2	binding/association	HTP	8.67775	0.3
Dlg4	Pgk1	binding/association	HTP	3.37	0.2
Dlg4	Phb2	binding/association	HTP	2.575	0.1
Dlg4	Arpc4	binding/association	HTP	3.37	0.2
Dlg4	Ppp3ca	binding/association	HTP	50.4571	0.5
Dlg4	Ppp3cb	binding/association	HTP	50.4571	0.5
Dlg4	Prdx1	binding/association	HTP	2.575	0.1
Dlg4	Prdx2	binding/association	HTP	2.575	0.1
Dlg4	Rab6a	binding/association	HTP	50.4571	0.5
Dlg4	Rac1	binding/association	HTP	170.041	0.7
Dlg4	Asrgl1	binding/association	HTP	3.37	0.2
Dlx1	Sp7	binding/association	HTP	2.575	0.1
Dlx1	Tbx21	binding/association	HTP	2.575	0.1
Dlx1	Dlx2	binding/association	HTP	2.575	0.1
Dlx1	Foxa1	binding/association	HTP	2.575	0.1
Dlx1	Hoxb13	binding/association	HTP	2.575	0.1
Dlx1	Mixl1	binding/association	HTP	2.575	0.1
Dlx2	Sp7	binding/association	HTP	2.575	0.1
Dlx2	Msx1	binding/association	HTP	2.575	0.1
Dlx4	Sp7	binding/association	HTP	2.575	0.1
Dlx4	Zfp263	binding/association	HTP	2.575	0.1
Dlx5	Sp7	binding/association	HTP	2.575	0.1
Dlx5	Hnf4g	binding/association	HTP	2.575	0.1
Dlx5	Hoxb13	binding/association	HTP	170.041	0.7
Dlx5	Jdp2	binding/association	HTP	8.67775	0.3
Dlx5	Maged1	binding/association	HTP	999	0.8
Dlx5	Nfe2	binding/association	HTP	2.575	0.1
Dmap1	Ruvbl2	binding/association	HTP	3.37	0.2
Dmap1	Vps72	binding/association	HTP	8.67775	0.3
Dmap1	Yeats4	binding/association	HTP	8.67775	0.3
Dmap1	Brd8	binding/association	HTP	8.67775	0.3
Dmap1	Ep400	binding/association	HTP	8.67775	0.3
Dmap1	Epc1	binding/association	HTP	8.67775	0.3
Dmap1	Epc2	binding/association	HTP	8.67775	0.3
Dmap1	Actb	binding/association	HTP	8.67775	0.3
Dmap1	Actl6a	binding/association	HTP	8.67775	0.3
Dmap1	Actr6	binding/association	HTP	8.67775	0.3
Dmap1	Ing3	binding/association	HTP	8.67775	0.3
Dmap1	Kat5	binding/association	HTP	3.37	0.2
Dmd	Snta1	binding/association	HTP	8.67775	0.3
Dmrt1	Sox9	binding/association	HTP	999	0.8
Dmrt2	Ccdc18	binding/association	HTP	2.575	0.1
Dmrt2	Actb	binding/association	HTP	2.575	0.1
Dmrt2	Actc1	binding/association	HTP	2.575	0.1
Dmrt2	Fxr1	binding/association	HTP	2.575	0.1
Dmrt2	Fxr2	binding/association	HTP	2.575	0.1
Dmrt2	Hnrnpa1	binding/association	HTP	2.575	0.1
Dmrt2	Hnrnpab	binding/association	HTP	2.575	0.1
Dmrt2	Hnrnpd	binding/association	HTP	2.575	0.1
Dmrt2	Hnrnpf	binding/association	HTP	2.575	0.1
Dmrt2	Hnrnph2	binding/association	HTP	2.575	0.1
Dmrt2	Krt77	binding/association	HTP	2.575	0.1
Dmrt2	Krt78	binding/association	HTP	2.575	0.1
Dmrt2	Pabpc1	binding/association	HTP	2.575	0.1
Dmrt2	Pdlim7	binding/association	HTP	2.575	0.1
Dmrtc2	Abtb1	binding/association	HTP	2.575	0.1
Dmrtc2	Ivns1abp	binding/association	HTP	2.575	0.1
Dnajc5	Sgta	binding/association	HTP	2.575	0.1
Dnajc5	Dnajc5	binding/association	HTP	8.67775	0.3
Dnm1	Sh3gl2	binding/association	HTP	999	0.8
Dnm1	Tuba1a	binding/association	HTP	3.37	0.2
Dnm1	Kif5a	binding/association	HTP	3.37	0.2
Dnmt1	Hdac1	binding/association	HTP	8.67775	0.3
Dnmt3a	Dnmt3l	binding/association	HTP	999	0.8
Dock1	Elmo2	binding/association	HTP	8.67775	0.3
Dock1	Elmo3	binding/association	HTP	8.67775	0.3
Dock2	Elmo1	binding/association	HTP	8.67775	0.3
Dok1	Tec	binding/association	HTP	8.67775	0.3
Dok1	Csk	binding/association	HTP	2.575	0.1
Dok1	Grb2	binding/association	HTP	3.37	0.2
Dok1	Inpp5d	binding/association	HTP	3.37	0.2
Dok1	Nck2	binding/association	HTP	2.575	0.1
Dok1	Rasa1	binding/association	HTP	19.595	0.4
Dok2	Inpp5d	binding/association	HTP	2.575	0.1
Dok2	Rasa1	binding/association	HTP	2.575	0.1
Dok7	Dok7	binding/association	HTP	999	0.8
Dok7	Musk	binding/association	HTP	999	0.8
Dot1l	Mllt1	binding/association	HTP	999	0.8
Dph1	Dph2	binding/association	HTP	50.4571	0.5
Dpm2	H2-Eb1	binding/association	HTP	2.575	0.1
Drg1	Zc3h15	binding/association	HTP	2.575	0.1
Dtna	Dmd	binding/association	HTP	170.041	0.7
Dtnbp1	Dtna	binding/association	HTP	999	0.8
Dtnbp1	Dtnb	binding/association	HTP	999	0.8
Acadvl	Socs3	binding/association	HTP	2.575	0.1
Dvl1	Dvl1	binding/association	HTP	999	0.8
Dvl2	Dvl1	binding/association	HTP	66.0352	0.6
Dvl2	Dvl2	binding/association	HTP	999	0.8
Dync1h1	Csf1	binding/association	HTP	2.575	0.1
Dynlt3	Bub3	binding/association	HTP	999	0.8
Dyrk1a	Dyrk1a	binding/association	HTP	999	0.8
E2f1	Sp1	binding/association	HTP	8.67775	0.3
E2f2	Gata1	binding/association	HTP	3.37	0.2
E2f2	Rb1	binding/association	HTP	3.37	0.2
E2f4	Rbl1	binding/association	HTP	3.37	0.2
E4f1	Gmeb2	binding/association	HTP	2.575	0.1
E4f1	Nfe2	binding/association	HTP	2.575	0.1
Ebf1	Ebf4	binding/association	HTP	50.4571	0.5
Ebf3	Ebf4	binding/association	HTP	50.4571	0.5
Eea1	Stk4	binding/association	HTP	999	0.8
Eea1	Rassf5	binding/association	HTP	999	0.8
Eed	Setx	binding/association	HTP	2.575	0.1
Eed	Stk38	binding/association	HTP	2.575	0.1
Eed	Suz12	binding/association	HTP	8.67775	0.3
Eed	Eif2s2	binding/association	HTP	2.575	0.1
Eed	Ezh1	binding/association	HTP	50.4571	0.5
Eed	Actg1	binding/association	HTP	50.4571	0.5
Eed	Aebp2	binding/association	HTP	8.67775	0.3
Eed	Jarid2	binding/association	HTP	8.67775	0.3
Eed	Lrrfip1	binding/association	HTP	3.37	0.2
Eed	Prmt5	binding/association	HTP	8.67775	0.3
Eed	Psmc1	binding/association	HTP	2.575	0.1
Eed	Psmd6	binding/association	HTP	2.575	0.1
Eed	Rbbp4	binding/association	HTP	170.041	0.7
Eed	Rbbp7	binding/association	HTP	170.041	0.7
Egflam	Dmd	binding/association	HTP	999	0.8
Egflam	Grik2	binding/association	HTP	999	0.8
Egr1	Egr1	binding/association	HTP	8.67775	0.3
Egr1	G3bp1	binding/association	HTP	8.67775	0.3
Ehf	Nfkbiz	binding/association	HTP	2.575	0.1
Ehmt2	H3f3b	binding/association	HTP	999	0.8
Eif2c1	Trim32	binding/association	HTP	2.575	0.1
Eif2s1	Ppp1ca	binding/association	HTP	999	0.8
Eif2s1	Ppp1cc	binding/association	HTP	999	0.8
Eif4e	Eif4e	binding/association	HTP	8.67775	0.3
Elf5	Nfkbiz	binding/association	HTP	2.575	0.1
Eme1	Uhrf1	binding/association	HTP	999	0.8
Eme1	Mus81	binding/association	HTP	999	0.8
Emx1	Spdef	binding/association	HTP	2.575	0.1
Emx1	Tlx1	binding/association	HTP	2.575	0.1
Emx1	Vdr	binding/association	HTP	2.575	0.1
Emx1	Gata6	binding/association	HTP	2.575	0.1
Emx1	Gtf2a1	binding/association	HTP	2.575	0.1
Emx1	Gtf2a1l	binding/association	HTP	2.575	0.1
Emx1	Hnf1a	binding/association	HTP	2.575	0.1
Emx1	Hnf4g	binding/association	HTP	2.575	0.1
Emx1	Id3	binding/association	HTP	2.575	0.1
Emx1	Irf7	binding/association	HTP	2.575	0.1
Emx1	Irf9	binding/association	HTP	2.575	0.1
Emx1	Kdm4b	binding/association	HTP	2.575	0.1
Emx1	Meis2	binding/association	HTP	2.575	0.1
Emx1	Otx2	binding/association	HTP	2.575	0.1
Emx2	Tlx1	binding/association	HTP	2.575	0.1
Emx2	Irx6	binding/association	HTP	2.575	0.1
Emx2	Nkx2-1	binding/association	HTP	8.67775	0.3
Enam	Sep15	binding/association	HTP	999	0.8
Enam	Tmeff2	binding/association	HTP	999	0.8
Enam	Tmem66	binding/association	HTP	999	0.8
Enam	Trf	binding/association	HTP	999	0.8
Enam	Bgn	binding/association	HTP	999	0.8
Enam	Xylt2	binding/association	HTP	999	0.8
Enam	Bst2	binding/association	HTP	999	0.8
Enam	Car3	binding/association	HTP	999	0.8
Enam	Col2a1	binding/association	HTP	999	0.8
Enam	Col5a1	binding/association	HTP	999	0.8
Enam	Ctsd	binding/association	HTP	999	0.8
Enam	Ahsg	binding/association	HTP	999	0.8
Enam	AI837181	binding/association	HTP	999	0.8
Enam	Kng1	binding/association	HTP	999	0.8
Enam	Lman2	binding/association	HTP	999	0.8
Enam	Mfap5	binding/association	HTP	999	0.8
Enam	Anxa2	binding/association	HTP	999	0.8
Epcam	Atp1a1	binding/association	HTP	999	0.8
Epcam	Atp1b1	binding/association	HTP	999	0.8
Epcam	Slc15a1	binding/association	HTP	999	0.8
Epcam	Tspan8	binding/association	HTP	999	0.8
Epcam	Actr3	binding/association	HTP	999	0.8
Epha4	Chn1	binding/association	HTP	50.4571	0.5
Epha4	Efnb2	binding/association	HTP	19.595	0.4
Epha5	Efna5	binding/association	HTP	999	0.8
Ephx1	Pgrmc1	binding/association	HTP	3.37	0.2
Epor	Plcg1	binding/association	HTP	999	0.8
Eps15	Eps15	binding/association	HTP	8.67775	0.3
Eps15	Eps15l1	binding/association	HTP	8.67775	0.3
Erbb2	Erbb3	binding/association	HTP	8.67775	0.3
Ercc8	Ssbp3	binding/association	HTP	2.575	0.1
Ercc8	Ssbp4	binding/association	HTP	2.575	0.1
Erg	Hspa8	binding/association	HTP	3.37	0.2
Acsl1	Ephx1	binding/association	HTP	3.37	0.2
Acsl1	Pgrmc1	binding/association	HTP	3.37	0.2
Esr1	Foxl2	binding/association	HTP	8.67775	0.3
Esr1	Mdm2	binding/association	HTP	8.67775	0.3
Esr1	Ppp1cc	binding/association	HTP	999	0.8
Esr1	Psmd1	binding/association	HTP	999	0.8
Esr2	Fos	binding/association	HTP	8.67775	0.3
Esr2	Foxl2	binding/association	HTP	8.67775	0.3
Esrra	Kat2b	binding/association	HTP	8.67775	0.3
Esrrg	Hlf	binding/association	HTP	3.37	0.2
Ets1	Ets1	binding/association	HTP	8.67775	0.3
Ewsr1	Sirt2	binding/association	HTP	3.37	0.2
Ewsr1	Srebf1	binding/association	HTP	3.37	0.2
Ewsr1	Trps1	binding/association	HTP	3.37	0.2
Ewsr1	Chd4	binding/association	HTP	66.0352	0.6
Ewsr1	Hdac10	binding/association	HTP	3.37	0.2
Ewsr1	Jarid2	binding/association	HTP	3.37	0.2
Ewsr1	Mecp2	binding/association	HTP	3.37	0.2
Ewsr1	Mms19	binding/association	HTP	3.37	0.2
Ewsr1	Mtf2	binding/association	HTP	66.0352	0.6
Ewsr1	Naa15	binding/association	HTP	3.37	0.2
Ewsr1	Nkd2	binding/association	HTP	3.37	0.2
Ewsr1	Per1	binding/association	HTP	3.37	0.2
Ewsr1	Polr1a	binding/association	HTP	3.37	0.2
Ewsr1	Polr2b	binding/association	HTP	3.37	0.2
Ewsr1	Pou5f1	binding/association	HTP	999	0.8
Ewsr1	Pwp1	binding/association	HTP	3.37	0.2
Ewsr1	Ash1l	binding/association	HTP	19.595	0.4
Ewsr1	Rorc	binding/association	HTP	3.37	0.2
Exoc3	Ccnd1	binding/association	HTP	999	0.8
Exosc1	Ddx60	binding/association	HTP	2.575	0.1
Exosc4	Ddx60	binding/association	HTP	2.575	0.1
Eya2	Sharpin	binding/association	HTP	999	0.8
Eya2	Six4	binding/association	HTP	999	0.8
Ezh1	Suz12	binding/association	HTP	8.67775	0.3
Ezh1	Aebp2	binding/association	HTP	8.67775	0.3
Ezh1	Rbbp4	binding/association	HTP	50.4571	0.5
Ezh2	Suz12	binding/association	HTP	8.67775	0.3
Ezh2	Dnmt1	binding/association	HTP	3.37	0.2
Ezh2	Eed	binding/association	HTP	170.041	0.7
Ezh2	Aebp2	binding/association	HTP	8.67775	0.3
Ezh2	Jarid2	binding/association	HTP	8.67775	0.3
Ezh2	Rbbp4	binding/association	HTP	170.041	0.7
Ezh2	Rbbp7	binding/association	HTP	170.041	0.7
Acta2	Casp3	binding/association	HTP	999	0.8
Fabp6	Lgals2	binding/association	HTP	999	0.8
Fanci	Fancd2	binding/association	HTP	999	0.8
Fancl	Ube2w	binding/association	HTP	999	0.8
Fas	Ube2i	binding/association	HTP	999	0.8
Fas	Casp8	binding/association	HTP	8.67775	0.3
Fas	Hipk3	binding/association	HTP	999	0.8
Fbxl20	Skp1a	binding/association	HTP	50.4571	0.5
Fbxl20	Syp	binding/association	HTP	999	0.8
Fbxl20	Cul1	binding/association	HTP	50.4571	0.5
Fbxl3	Cry1	binding/association	HTP	8.67775	0.3
Fbxl3	Cry2	binding/association	HTP	8.67775	0.3
Actn4	Micall2	binding/association	HTP	50.4571	0.5
Fbxo32	Myod1	binding/association	HTP	2.575	0.1
Fbxo4	Skp1a	binding/association	HTP	3.37	0.2
Fbxo4	Ccnd1	binding/association	HTP	3.37	0.2
Fgfr1	Frs2	binding/association	HTP	999	0.8
Fhl2	Sphk1	binding/association	HTP	2.575	0.1
Fhl3	Ctbp2	binding/association	HTP	999	0.8
Flt1	Pgf	binding/association	HTP	170.041	0.7
Flt1	Pik3cg	binding/association	HTP	8.67775	0.3
Fmo5	Ephx1	binding/association	HTP	3.37	0.2
Fmr1	Thrb	binding/association	HTP	3.37	0.2
Fmr1	Eif6	binding/association	HTP	999	0.8
Fmr1	Fli1	binding/association	HTP	3.37	0.2
Fmr1	Nr1h2	binding/association	HTP	3.37	0.2
Fmr1	Pawr	binding/association	HTP	3.37	0.2
Foxh1	Fmr1	binding/association	HTP	3.37	0.2
Foxh1	Nkx2-5	binding/association	HTP	8.67775	0.3
Foxk1	Sin3b	binding/association	HTP	999	0.8
Foxm1	Nanog	binding/association	HTP	2.575	0.1
Foxn2	Tlx3	binding/association	HTP	2.575	0.1
Foxo1	Hdac4	binding/association	HTP	3.37	0.2
Foxo4	Crebbp	binding/association	HTP	8.67775	0.3
Foxp1	Tle6	binding/association	HTP	2.575	0.1
Foxp1	Foxp1	binding/association	HTP	8.67775	0.3
Foxq1	Ssbp2	binding/association	HTP	2.575	0.1
Foxq1	Ssbp3	binding/association	HTP	2.575	0.1
Frzb	Wnt3a	binding/association	HTP	8.67775	0.3
Fth1	Fth1	binding/association	HTP	170.041	0.7
Fyn	Sphk2	binding/association	HTP	8.67775	0.3
Fyn	Bcar1	binding/association	HTP	50.4571	0.5
Fyn	Uck2	binding/association	HTP	8.67775	0.3
Fyn	Hcls1	binding/association	HTP	170.041	0.7
Fyn	Khdrbs1	binding/association	HTP	8.67775	0.3
Fyn	Ptk2	binding/association	HTP	170.041	0.7
Fyn	Raver1	binding/association	HTP	2.575	0.1
Fzd1	Wnt7b	binding/association	HTP	8.67775	0.3
Fzd10	Wnt7b	binding/association	HTP	2.575	0.1
Fzd4	Wnt7b	binding/association	HTP	2.575	0.1
Fzr1	Sirt2	binding/association	HTP	3.37	0.2
Gata1	Smarca5	binding/association	HTP	2.575	0.1
Gata1	Tal1	binding/association	HTP	8.67775	0.3
Gata1	Chd4	binding/association	HTP	8.67775	0.3
Gata1	Creb1	binding/association	HTP	3.37	0.2
Gata1	Gfi1b	binding/association	HTP	8.67775	0.3
Gata1	Ldb1	binding/association	HTP	8.67775	0.3
Gata1	Lmo2	binding/association	HTP	8.67775	0.3
Gata1	Mbd2	binding/association	HTP	2.575	0.1
Gata1	Mbd3	binding/association	HTP	8.67775	0.3
Gata1	Mta2	binding/association	HTP	3.37	0.2
Gata1	Rbbp4	binding/association	HTP	2.575	0.1
Gata1	Rbbp7	binding/association	HTP	8.67775	0.3
Gata3	Tbx21	binding/association	HTP	8.67775	0.3
Gata3	Med1	binding/association	HTP	2.575	0.1
Gata5	Zfp292	binding/association	HTP	2.575	0.1
Gata5	Rorb	binding/association	HTP	2.575	0.1
Gata6	Med1	binding/association	HTP	2.575	0.1
Gata6	Nkx2-1	binding/association	HTP	2.575	0.1
Gatad2a	Sin3a	binding/association	HTP	3.37	0.2
Gda	Dlg4	binding/association	HTP	2.575	0.1
Gemin6	Gemin7	binding/association	HTP	170.041	0.7
Gfi1b	Hdac1	binding/association	HTP	8.67775	0.3
Gfi1b	Hdac2	binding/association	HTP	8.67775	0.3
Gfi1b	Kdm1a	binding/association	HTP	3.37	0.2
Gfi1b	Rcor1	binding/association	HTP	8.67775	0.3
Gfi1b	Rcor2	binding/association	HTP	8.67775	0.3
Gfi1b	Rcor3	binding/association	HTP	8.67775	0.3
Ggn	Ggnbp1	binding/association	HTP	999	0.8
Ggn	Ggnbp2	binding/association	HTP	999	0.8
Git1	Tubb4b	binding/association	HTP	3.37	0.2
Git1	Actg1	binding/association	HTP	2.575	0.1
Git1	Afg3l2	binding/association	HTP	8.67775	0.3
Git1	Pak3	binding/association	HTP	50.4571	0.5
Git1	Pum1	binding/association	HTP	3.37	0.2
Gja1	Gjc1	binding/association	HTP	170.041	0.7
Gjb2	Cnst	binding/association	HTP	999	0.8
Gjb3	Gja1	binding/association	HTP	170.041	0.7
Gjb6	Cnst	binding/association	HTP	999	0.8
Gli2	Btrc	binding/association	HTP	2.575	0.1
Gli3	Ski	binding/association	HTP	2.575	0.1
Glis2	Ctbp1	binding/association	HTP	999	0.8
Glud1	Atp1a3	binding/association	HTP	8.67775	0.3
Glud1	Atp5a1	binding/association	HTP	8.67775	0.3
Glud1	Atp5b	binding/association	HTP	8.67775	0.3
Glud1	Sept7	binding/association	HTP	3.37	0.2
Glud1	Sh3gl2	binding/association	HTP	2.575	0.1
Glud1	Atp6v1a	binding/association	HTP	8.67775	0.3
Glud1	Atp6v1b2	binding/association	HTP	8.67775	0.3
Glud1	Atp6v1e1	binding/association	HTP	3.37	0.2
Glud1	Slc25a12	binding/association	HTP	3.37	0.2
Glud1	Snap25	binding/association	HTP	3.37	0.2
Glud1	Sphk2	binding/association	HTP	3.37	0.2
Glud1	Spna2	binding/association	HTP	2.575	0.1
Glud1	Spnb2	binding/association	HTP	2.575	0.1
Glud1	Spnb3	binding/association	HTP	2.575	0.1
Glud1	Stk30	binding/association	HTP	8.67775	0.3
Glud1	Stxbp1	binding/association	HTP	3.37	0.2
Glud1	Syn1	binding/association	HTP	8.67775	0.3
Glud1	Syn2	binding/association	HTP	8.67775	0.3
Glud1	Syt1	binding/association	HTP	2.575	0.1
Glud1	Tkt	binding/association	HTP	2.575	0.1
Glud1	Tnr	binding/association	HTP	2.575	0.1
Glud1	Tuba1a	binding/association	HTP	8.67775	0.3
Glud1	Tubb2a	binding/association	HTP	8.67775	0.3
Glud1	Tubb3	binding/association	HTP	8.67775	0.3
Glud1	Tubb4a	binding/association	HTP	8.67775	0.3
Glud1	Tufm	binding/association	HTP	8.67775	0.3
Glud1	Vcp	binding/association	HTP	8.67775	0.3
Glud1	Vdac1	binding/association	HTP	8.67775	0.3
Glud1	Vdac2	binding/association	HTP	8.67775	0.3
Glud1	Ywhaz	binding/association	HTP	8.67775	0.3
Glud1	Aak1	binding/association	HTP	8.67775	0.3
Glud1	Ckb	binding/association	HTP	8.67775	0.3
Glud1	Ckmt1	binding/association	HTP	8.67775	0.3
Glud1	Cltc	binding/association	HTP	3.37	0.2
Glud1	Cntn1	binding/association	HTP	2.575	0.1
Glud1	Cs	binding/association	HTP	3.37	0.2
Glud1	Cyc1	binding/association	HTP	3.37	0.2
Glud1	Dnm1	binding/association	HTP	8.67775	0.3
Glud1	Eef2	binding/association	HTP	8.67775	0.3
Glud1	Aco2	binding/association	HTP	3.37	0.2
Glud1	Actn1	binding/association	HTP	2.575	0.1
Glud1	Fh1	binding/association	HTP	3.37	0.2
Glud1	Adam22	binding/association	HTP	2.575	0.1
Glud1	Glul	binding/association	HTP	3.37	0.2
Glud1	Gna13	binding/association	HTP	8.67775	0.3
Glud1	Gnai2	binding/association	HTP	8.67775	0.3
Glud1	Gnao1	binding/association	HTP	8.67775	0.3
Glud1	Hadhb	binding/association	HTP	3.37	0.2
Glud1	Hk1	binding/association	HTP	3.37	0.2
Glud1	Hsp90aa1	binding/association	HTP	8.67775	0.3
Glud1	Hsp90ab1	binding/association	HTP	8.67775	0.3
Glud1	Hspa5	binding/association	HTP	8.67775	0.3
Glud1	Hspa8	binding/association	HTP	8.67775	0.3
Glud1	Idh3a	binding/association	HTP	3.37	0.2
Glud1	Aldh1l1	binding/association	HTP	8.67775	0.3
Glud1	Amhr2	binding/association	HTP	8.67775	0.3
Glud1	Mdh2	binding/association	HTP	3.37	0.2
Glud1	Ank2	binding/association	HTP	2.575	0.1
Glud1	Ndufa10	binding/association	HTP	3.37	0.2
Glud1	Ndufb4	binding/association	HTP	3.37	0.2
Glud1	Nfasc	binding/association	HTP	2.575	0.1
Glud1	Ap1b1	binding/association	HTP	2.575	0.1
Glud1	Nsf	binding/association	HTP	8.67775	0.3
Glud1	Ap2a1	binding/association	HTP	2.575	0.1
Glud1	Ap2b1	binding/association	HTP	2.575	0.1
Glud1	Opa1	binding/association	HTP	8.67775	0.3
Glud1	Pacsin1	binding/association	HTP	2.575	0.1
Glud1	Papln	binding/association	HTP	2.575	0.1
Glud1	Pdha1	binding/association	HTP	3.37	0.2
Glud1	Pdhb	binding/association	HTP	8.67775	0.3
Glud1	Pfkl	binding/association	HTP	8.67775	0.3
Glud1	Pfkm	binding/association	HTP	8.67775	0.3
Glud1	Phb	binding/association	HTP	3.37	0.2
Glud1	Pink1	binding/association	HTP	8.67775	0.3
Glud1	Pkm	binding/association	HTP	3.37	0.2
Glud1	Ppp2r1a	binding/association	HTP	2.575	0.1
Glud1	Ppp3ca	binding/association	HTP	3.37	0.2
Gm10116	Fth1	binding/association	HTP	170.041	0.7
Gm10116	Gm10116	binding/association	HTP	170.041	0.7
Gm10123	Slc9a3r1	binding/association	HTP	999	0.8
Gm10123	Cdc42	binding/association	HTP	999	0.8
Gm10123	Ces1e	binding/association	HTP	999	0.8
Gm10123	Abcg3	binding/association	HTP	999	0.8
Gm10123	Dstn	binding/association	HTP	999	0.8
Gm10123	Ezr	binding/association	HTP	999	0.8
Gm10123	Agr2	binding/association	HTP	999	0.8
Gm10123	Aifm1	binding/association	HTP	3.37	0.2
Gm10123	Lgals2	binding/association	HTP	999	0.8
Gm10123	Lgals4	binding/association	HTP	999	0.8
Gm10123	Anxa4	binding/association	HTP	999	0.8
Gm10123	Pfn1	binding/association	HTP	999	0.8
Add1	Sin3a	binding/association	HTP	3.37	0.2
Gm5884	Tollip	binding/association	HTP	2.575	0.1
Gmnn	Scmh1	binding/association	HTP	999	0.8
Gmnn	Spata24	binding/association	HTP	999	0.8
Gmnn	Tbp	binding/association	HTP	3.37	0.2
Gmnn	Tbpl1	binding/association	HTP	3.37	0.2
Gmnn	Hoxa10	binding/association	HTP	2.575	0.1
Gmnn	Hoxa11	binding/association	HTP	999	0.8
Gmnn	Hoxa7	binding/association	HTP	8.67775	0.3
Gmnn	Hoxb7	binding/association	HTP	8.67775	0.3
Gmnn	Hoxc8	binding/association	HTP	8.67775	0.3
[truncated: 101,220 more rows]
