# Supplementary material for: Linking Transcriptional Changes over Time in Stimulated Dendritic Cells to Identify Gene Networks Activated during the Innate Immune Response
Source: PLoS Comput Biol. 2013 Nov 7;9(11):e1003323. doi: 10.1371/journal.pcbi.1003323 (PMC3820512; doi:10.1371/journal.pcbi.1003323)
Supplement: Table S21 — The values of and tested to obtain the optimal sub-network prediction. (XLSX) [file pcbi.1003323.s029.xlsx]

## Sheet: optimization problem
Supporting Table S21. The values of gamma1 and gamma2 tested to obtain the optimal network prediction
Gamma1	Gamma2	Predicted nodes	Total input nodes	Initial response genes	Intemediate regulators	Final effectors	Predicted edges	Predicted edges with w < 0.5	Predicted edges with w < 0.3	Fraction of nodes in predicted network	Fraction of input nodes selected	Initial response genes	Intemediate regulators	Final effectors	Predicted edges	Predicted edges with w < 0.5	Predicted edges with w < 0.3	(Fraction of nodes predicted/Fraction of edges with w<0.5)
0	0	895	382	118	138	125	2033	243	174	0.0696173	0.249185	0.257642	0.212963	0.29274	0.0196962	0.00676127	0.00509562	36.8547
0.5	0	1225	616	260	154	201	2681	332	255	0.0952862	0.401826	0.567686	0.237654	0.470726	0.0259742	0.00923762	0.00746771	43.4989
1	0	1475	793	370	162	260	3121	409	306	0.114732	0.517286	0.80786	0.25	0.608899	0.030237	0.0113801	0.00896126	45.4554
1.5	0	1639	888	422	173	292	3387	496	398	0.127489	0.579256	0.921397	0.266975	0.683841	0.032814	0.0138008	0.0116555	41.9727
0	0.5	1520	509	139	220	149	3958	488	404	0.118233	0.332029	0.303493	0.339506	0.348946	0.038346	0.0135782	0.0118312	24.4531
4.5	0	1704	917	439	174	303	3490	522	426	0.132545	0.598174	0.958515	0.268519	0.709602	0.0338119	0.0145242	0.0124755	41.1846
5	0	1708	917	439	174	303	3499	529	428	0.132856	0.598174	0.958515	0.268519	0.709602	0.0338991	0.014719	0.012534	40.6396
2	0	1689	910	434	174	301	3466	532	428	0.131378	0.593607	0.947598	0.268519	0.704918	0.0335794	0.0148024	0.012534	40.102
3	0	1710	917	439	174	303	3507	531	431	0.133012	0.598174	0.958515	0.268519	0.709602	0.0339766	0.0147746	0.0126219	40.4865
2.5	0	1709	916	438	173	304	3496	534	436	0.132934	0.597521	0.956332	0.266975	0.711944	0.0338701	0.0148581	0.0127683	40.2152
4	0	1704	917	439	174	303	3490	547	436	0.132545	0.598174	0.958515	0.268519	0.709602	0.0338119	0.0152198	0.0127683	39.3023
0	3.5	1864	514	151	192	170	4815	584	440	0.144991	0.33529	0.329694	0.296296	0.398126	0.0466488	0.0162493	0.0128855	20.6341
3.5	0	1703	917	439	174	303	3497	544	446	0.132467	0.598174	0.958515	0.268519	0.709602	0.0338797	0.0151363	0.0130612	39.519
0	3	1871	519	153	197	168	4827	590	447	0.145535	0.338552	0.334061	0.304012	0.393443	0.0467651	0.0164162	0.0130905	20.623
0	5	1863	511	152	188	170	4840	593	451	0.144913	0.333333	0.331878	0.290123	0.398126	0.046891	0.0164997	0.0132076	20.2024
0.5	0.5	1796	710	262	233	214	4558	567	460	0.139701	0.463144	0.572052	0.359568	0.501171	0.044159	0.0157763	0.0134712	29.357
0	4	1880	516	152	193	170	4854	611	463	0.146235	0.336595	0.331878	0.29784	0.398126	0.0470267	0.0170006	0.013559	19.7991
0	2.5	1840	522	157	199	165	4757	610	467	0.143124	0.340509	0.342795	0.307099	0.386417	0.0460869	0.0169727	0.0136762	20.0621
0	4.5	1865	512	153	189	169	4826	625	479	0.145068	0.333986	0.334061	0.291667	0.395785	0.0467554	0.0173901	0.0140276	19.2055
0.5	4	2095	679	269	193	216	5329	643	486	0.162959	0.442922	0.587336	0.29784	0.505855	0.0516286	0.0178909	0.0142326	24.7568
0.5	3.5	2081	682	269	196	216	5322	644	488	0.16187	0.444879	0.587336	0.302469	0.505855	0.0515608	0.0179188	0.0142912	24.8276
0.5	3	2079	682	267	198	216	5319	655	491	0.161714	0.444879	0.582969	0.305556	0.505855	0.0515317	0.0182248	0.014379	24.4106
0.5	5	2093	670	265	189	215	5343	663	499	0.162803	0.437052	0.578603	0.291667	0.503513	0.0517642	0.0184474	0.0146133	23.6918
1	0.5	2065	890	373	244	272	5047	634	507	0.160625	0.580561	0.81441	0.376543	0.637002	0.0488965	0.0176405	0.0148476	32.9107
0	2	1841	524	157	201	165	4745	657	513	0.143202	0.341813	0.342795	0.310185	0.386417	0.0459707	0.0182805	0.0150233	18.6983
0.5	2.5	2066	682	265	200	216	5268	677	517	0.160703	0.444879	0.578603	0.308642	0.505855	0.0510376	0.018837	0.0151404	23.6174
0.5	4.5	2090	674	267	190	216	5338	682	519	0.16257	0.439661	0.582969	0.29321	0.505855	0.0517158	0.0189761	0.015199	23.1692
1	5	2329	829	367	191	270	5787	718	533	0.181161	0.54077	0.80131	0.294753	0.632319	0.0560658	0.0199777	0.015609	27.0686
0	1	1757	538	148	230	159	4499	667	542	0.136668	0.350946	0.323144	0.354938	0.372365	0.0435874	0.0185587	0.0158726	18.91
1	4	2326	836	368	195	272	5775	721	544	0.180927	0.545336	0.803493	0.300926	0.637002	0.0559495	0.0200612	0.0159311	27.1836
1	3	2337	848	370	203	274	5784	726	558	0.181783	0.553164	0.80786	0.313272	0.641686	0.0560367	0.0202003	0.0163411	27.3839
1	4.5	2328	832	366	194	271	5784	732	560	0.181083	0.542727	0.799127	0.299383	0.63466	0.0560367	0.0203673	0.0163997	26.647
0.5	2	2058	690	267	203	219	5256	719	560	0.160081	0.450098	0.582969	0.313272	0.512881	0.0509214	0.0200056	0.0163997	22.4986
1	3.5	2340	838	368	198	271	5792	736	564	0.182016	0.546641	0.803493	0.305556	0.63466	0.0561142	0.0204786	0.0165168	26.6933
1.5	5	2446	905	415	192	297	5975	750	570	0.190261	0.590346	0.906114	0.296296	0.69555	0.0578872	0.0208681	0.0166925	28.2894
1	2.5	2334	853	372	208	272	5745	753	585	0.181549	0.556425	0.812227	0.320988	0.637002	0.0556589	0.0209516	0.0171318	26.5577
0	1.5	1809	529	152	213	163	4677	722	595	0.140713	0.345075	0.331878	0.328704	0.381733	0.0453119	0.020089	0.0174247	17.1773
3.5	5	2526	950	439	194	316	6102	794	601	0.196484	0.6197	0.958515	0.299383	0.740047	0.0591176	0.0220924	0.0176004	28.0504
4.5	5	2525	951	439	194	317	6122	792	605	0.196406	0.620352	0.958515	0.299383	0.742389	0.0593114	0.0220367	0.0177175	28.1508
2	3.5	2498	946	433	201	311	6077	789	611	0.194306	0.617091	0.945415	0.310185	0.728337	0.0588754	0.0219533	0.0178932	28.1093
1	2	2338	870	373	217	279	5756	786	611	0.181861	0.567515	0.81441	0.334877	0.653396	0.0557655	0.0218698	0.0178932	25.9497
1.5	3.5	2445	914	416	200	297	5998	791	612	0.190184	0.596217	0.908297	0.308642	0.69555	0.05811	0.0220089	0.0179225	27.0898
2.5	5	2529	942	437	192	312	6119	803	613	0.196717	0.614481	0.954148	0.296296	0.730679	0.0592823	0.0223428	0.0179518	27.5024
1.5	3	2450	925	416	206	302	5990	788	614	0.190572	0.603392	0.908297	0.317901	0.70726	0.0580325	0.0219254	0.0179811	27.5202
1.5	0.5	2201	967	420	248	298	5267	740	615	0.171204	0.630789	0.917031	0.382716	0.697892	0.0510279	0.0205899	0.0180104	30.6359
2	5	2493	934	432	192	309	6057	802	615	0.193917	0.609263	0.943231	0.296296	0.723653	0.0586816	0.022315	0.0180104	27.3029
4	3.5	2525	957	439	201	316	6108	793	616	0.196406	0.624266	0.958515	0.310185	0.740047	0.0591757	0.0220646	0.0180397	28.2927
4	5	2517	951	439	194	317	6121	806	618	0.195784	0.620352	0.958515	0.299383	0.742389	0.0593017	0.0224263	0.0180982	27.6619
1.5	4.5	2454	908	414	194	299	6010	801	618	0.190884	0.592303	0.90393	0.299383	0.700234	0.0582263	0.0222871	0.0180982	26.576
0.5	1	1999	722	262	237	222	5054	754	619	0.155492	0.470972	0.572052	0.365741	0.519906	0.0489643	0.0209794	0.0181275	22.4492
3	3.5	2528	958	439	201	317	6131	795	620	0.19664	0.624918	0.958515	0.310185	0.742389	0.0593986	0.0221202	0.0181568	28.251
2	4	2510	939	433	195	310	6097	801	620	0.19524	0.612524	0.945415	0.300926	0.725995	0.0590692	0.0222871	0.0181568	27.4833
5	5	2512	951	439	195	316	6100	819	622	0.195395	0.620352	0.958515	0.300926	0.740047	0.0590982	0.022788	0.0182154	27.2228
5	3.5	2530	957	439	201	316	6128	798	623	0.196795	0.624266	0.958515	0.310185	0.740047	0.0593695	0.0222037	0.0182446	28.1154
3	5	2509	949	439	194	315	6106	814	626	0.195162	0.619048	0.958515	0.299383	0.737705	0.0591563	0.0226489	0.0183325	27.3324
2.5	3.5	2517	956	438	201	316	6109	798	628	0.195784	0.623614	0.956332	0.310185	0.740047	0.0591854	0.0222037	0.0183911	28.0861
1.5	4	2444	909	415	195	298	5981	813	628	0.190106	0.592955	0.906114	0.300926	0.697892	0.0579453	0.022621	0.0183911	26.2125
2.5	3	2521	967	438	209	319	6101	802	629	0.196095	0.630789	0.956332	0.322531	0.747073	0.0591079	0.022315	0.0184204	28.2675
4.5	3.5	2519	958	439	201	317	6123	806	629	0.19594	0.624918	0.958515	0.310185	0.742389	0.059321	0.0224263	0.0184204	27.8655
4	4.5	2540	954	439	195	319	6142	805	630	0.197573	0.622309	0.958515	0.300926	0.747073	0.0595051	0.0223984	0.0184496	27.7836
2	3	2504	954	433	208	312	6076	811	631	0.194773	0.622309	0.945415	0.320988	0.730679	0.0588657	0.0225654	0.0184789	27.578
4	3	2531	967	439	209	318	6126	814	632	0.196873	0.630789	0.958515	0.322531	0.744731	0.0593501	0.0226489	0.0185082	27.8508
4	4	2519	955	439	197	318	6116	820	632	0.19594	0.622962	0.958515	0.304012	0.744731	0.0592532	0.0228158	0.0185082	27.3039
3	4	2525	955	439	197	318	6119	819	633	0.196406	0.622962	0.958515	0.304012	0.744731	0.0592823	0.022788	0.0185375	27.3373
3.5	3.5	2532	957	439	201	316	6126	806	634	0.196951	0.624266	0.958515	0.310185	0.740047	0.0593501	0.0224263	0.0185668	27.8364
4.5	4	2537	954	439	197	317	6135	819	634	0.19734	0.622309	0.958515	0.304012	0.742389	0.0594373	0.022788	0.0185668	27.3087
2	4.5	2491	935	432	194	308	6077	812	635	0.193762	0.609915	0.943231	0.299383	0.721311	0.0588754	0.0225932	0.0185961	26.9955
4	0.5	2249	1001	439	254	307	5352	768	640	0.174938	0.652968	0.958515	0.391975	0.71897	0.0518514	0.0213689	0.0187425	30.5569
3	3	2522	968	439	209	319	6096	815	641	0.196173	0.631442	0.958515	0.322531	0.747073	0.0590595	0.0226767	0.0187718	27.8454
3.5	0.5	2254	1001	439	254	307	5345	776	642	0.175327	0.652968	0.958515	0.391975	0.71897	0.0517836	0.0215915	0.0188011	30.2418
5	3	2530	967	439	209	318	6112	817	642	0.196795	0.630789	0.958515	0.322531	0.744731	0.0592145	0.0227323	0.0188011	27.7486
5	4	2529	954	439	197	317	6136	820	642	0.196717	0.622309	0.958515	0.304012	0.742389	0.059447	0.0228158	0.0188011	27.2754
2.5	0.5	2255	999	438	253	307	5356	777	643	0.175404	0.651663	0.956332	0.390432	0.71897	0.0518902	0.0216194	0.0188304	30.1426
4.5	3	2531	967	439	209	318	6120	816	643	0.196873	0.630789	0.958515	0.322531	0.744731	0.059292	0.0227045	0.0188304	27.7826
4.5	4.5	2529	954	439	195	319	6140	820	643	0.196717	0.622309	0.958515	0.300926	0.747073	0.0594857	0.0228158	0.0188304	27.2754
5	0.5	2247	1001	439	254	307	5349	774	644	0.174782	0.652968	0.958515	0.391975	0.71897	0.0518224	0.0215359	0.0188596	30.32
4.5	0.5	2253	1001	439	254	307	5352	776	645	0.175249	0.652968	0.958515	0.391975	0.71897	0.0518514	0.0215915	0.0188889	30.2418
3.5	4	2523	955	439	197	318	6125	822	645	0.196251	0.622962	0.958515	0.304012	0.744731	0.0593404	0.0228715	0.0188889	27.2375
2	0.5	2240	994	434	254	305	5333	769	646	0.174238	0.648402	0.947598	0.391975	0.714286	0.0516673	0.0213968	0.0189182	30.3037
3.5	4.5	2528	953	439	195	318	6137	816	647	0.19664	0.621657	0.958515	0.300926	0.744731	0.0594567	0.0227045	0.0189475	27.3803
2.5	4.5	2524	950	438	195	316	6121	827	647	0.196329	0.6197	0.956332	0.300926	0.740047	0.0593017	0.0230106	0.0189475	26.9311
3	0.5	2256	1002	439	255	307	5351	781	648	0.175482	0.65362	0.958515	0.393519	0.71897	0.0518417	0.0217307	0.0189768	30.0783
2.5	4	2524	953	438	197	317	6125	820	648	0.196329	0.621657	0.956332	0.304012	0.742389	0.0593404	0.0228158	0.0189768	27.2468
5	4.5	2521	954	439	195	319	6126	831	648	0.196095	0.622309	0.958515	0.300926	0.747073	0.0593501	0.0231219	0.0189768	26.9143
3	4.5	2523	954	439	195	319	6135	832	652	0.196251	0.622309	0.958515	0.300926	0.747073	0.0594373	0.0231497	0.0190939	26.882
1.5	2.5	2450	929	416	211	301	5956	834	652	0.190572	0.606001	0.908297	0.325617	0.704918	0.0577031	0.0232053	0.0190939	26.1147
0.5	1.5	2063	712	267	220	224	5231	802	657	0.16047	0.464449	0.582969	0.339506	0.52459	0.0506791	0.022315	0.0192403	20.8133
1	1	2262	890	375	238	276	5518	803	658	0.175949	0.580561	0.818777	0.367284	0.64637	0.0534597	0.0223428	0.0192696	25.9843
2	2.5	2493	961	434	213	313	6039	837	659	0.193917	0.626875	0.947598	0.328704	0.733021	0.0585072	0.0232888	0.0192989	26.9174
3.5	3	2529	968	439	210	318	6099	839	661	0.196717	0.631442	0.958515	0.324074	0.744731	0.0590885	0.0233445	0.0193575	27.0489
2.5	2.5	2506	970	438	214	317	6071	847	663	0.194928	0.632746	0.956332	0.330247	0.742389	0.0588173	0.0235671	0.0194161	26.8488
1.5	2	2440	938	417	218	302	5945	857	674	0.189795	0.611872	0.91048	0.33642	0.70726	0.0575965	0.0238453	0.0197382	25.6601
3	2.5	2508	972	439	214	318	6055	869	683	0.195084	0.634051	0.958515	0.330247	0.744731	0.0586622	0.0241792	0.0200018	26.223
4	2.5	2512	972	439	214	318	6075	872	683	0.195395	0.634051	0.958515	0.330247	0.744731	0.058856	0.0242627	0.0200018	26.1328
4.5	2.5	2527	973	439	214	319	6087	864	685	0.196562	0.634703	0.958515	0.330247	0.747073	0.0589723	0.0240401	0.0200603	26.4019
3.5	2.5	2508	972	439	214	318	6066	871	686	0.195084	0.634051	0.958515	0.330247	0.744731	0.0587688	0.0242348	0.0200896	26.1628
1	1.5	2324	877	375	224	277	5703	859	693	0.180772	0.572081	0.818777	0.345679	0.648712	0.055252	0.0239009	0.0202946	23.9355
5	2.5	2510	973	439	214	319	6073	875	696	0.19524	0.634703	0.958515	0.330247	0.747073	0.0588366	0.0243461	0.0203825	26.07
4	2	2509	977	439	219	318	6041	872	698	0.195162	0.637312	0.958515	0.337963	0.744731	0.0585266	0.0242627	0.020441	26.2672
1.5	1	2380	963	421	241	300	5737	848	700	0.185128	0.62818	0.919214	0.371914	0.702576	0.0555814	0.0235949	0.0204996	26.6236
5	2	2507	977	439	219	318	6066	880	705	0.195006	0.637312	0.958515	0.337963	0.744731	0.0587688	0.0244853	0.020646	26.0284
2	2	2485	967	435	219	312	6017	889	706	0.193295	0.630789	0.949782	0.337963	0.730679	0.0582941	0.0247357	0.0206753	25.5012
3.5	2	2511	977	439	219	318	6053	893	709	0.195317	0.637312	0.958515	0.337963	0.744731	0.0586429	0.024847	0.0207632	25.6495
2.5	2	2497	975	438	219	317	6039	898	714	0.194228	0.636008	0.956332	0.337963	0.742389	0.0585072	0.0249861	0.0209096	25.4545
4.5	2	2507	978	439	219	319	6054	897	722	0.195006	0.637965	0.958515	0.337963	0.747073	0.0586526	0.0249583	0.0211439	25.5613
3	2	2504	977	439	219	318	6044	900	722	0.194773	0.637312	0.958515	0.337963	0.744731	0.0585557	0.0250417	0.0211439	25.45
4.5	1	2445	995	439	242	313	5816	886	733	0.190184	0.649054	0.958515	0.373457	0.733021	0.0563468	0.0246522	0.021466	26.3284
2	1	2420	988	434	243	310	5793	888	737	0.188239	0.644488	0.947598	0.375	0.725995	0.0561239	0.0247078	0.0215832	26.0843
3.5	1	2441	995	439	242	313	5830	884	738	0.189872	0.649054	0.958515	0.373457	0.733021	0.0564824	0.0245965	0.0216124	26.388
4	1	2445	995	439	242	313	5822	891	738	0.190184	0.649054	0.958515	0.373457	0.733021	0.0564049	0.0247913	0.0216124	26.1807
2.5	1	2432	993	438	242	312	5822	892	739	0.189172	0.64775	0.956332	0.373457	0.730679	0.0564049	0.0248191	0.0216417	26.0988
3	1	2444	995	439	242	313	5829	894	744	0.190106	0.649054	0.958515	0.373457	0.733021	0.0564727	0.0248748	0.0217882	26.0928
5	1	2446	995	439	242	313	5831	896	749	0.190261	0.649054	0.958515	0.373457	0.733021	0.0564921	0.0249304	0.0219346	26.0346
1.5	1.5	2426	955	418	227	309	5911	933	757	0.188706	0.622962	0.912664	0.350309	0.723653	0.0572671	0.0259599	0.0221689	23.997
2	1.5	2461	982	435	230	316	5955	950	781	0.191428	0.640574	0.949782	0.354938	0.740047	0.0576934	0.0264329	0.0228717	24.2339
2.5	1.5	2476	987	438	230	318	5994	968	797	0.192595	0.643836	0.956332	0.354938	0.744731	0.0580713	0.0269338	0.0233403	23.9044
3.5	1.5	2488	990	439	231	319	6007	972	797	0.193528	0.645793	0.958515	0.356481	0.747073	0.0581972	0.0270451	0.0233403	23.8784
5	1.5	2488	990	439	231	319	5999	974	803	0.193528	0.645793	0.958515	0.356481	0.747073	0.0581197	0.0271007	0.023516	23.8293
3	1.5	2487	990	439	231	319	5988	977	804	0.193451	0.645793	0.958515	0.356481	0.747073	0.0580131	0.0271842	0.0235453	23.7562
4	1.5	2491	990	439	231	319	5998	981	811	0.193762	0.645793	0.958515	0.356481	0.747073	0.05811	0.0272955	0.0237503	23.6593
4.5	1.5	2487	990	439	231	319	5979	983	811	0.193451	0.645793	0.958515	0.356481	0.747073	0.0579259	0.0273511	0.0237503	23.6112
